# Supplementary material for: Leveraging machine learning essentiality predictions and chemogenomic interactions to identify antifungal targets
Source: Nat Commun. 2021 Nov 11;12:6497. doi: 10.1038/s41467-021-26850-3 (PMC8586148; doi:10.1038/s41467-021-26850-3)
Supplement: Supplementary file 3 — Supplementary Data 1 [file 41467_2021_26850_MOESM3_ESM.xlsx]

## Sheet: Input Features
Supplementary Dataset 1: C. albicans essentiality predictions.
Feature	Source	Definition	Note
Gene expression level	gene expression data from C. albicans co-expression network analysis (O’Meara et al. 2021)	Median of TPM	covering 6,226 genes
Gene expression variance		Variance of TPM
Co-expression degree		Number of co-expression partners for 6,226 genes calculated from binarizing the co-expression network matrix with a threshold of top 1%
CAI	Retrieved from the Candida Genome Database (http://www.candidagenome.org/download/protein_properties/C_albicans_SC5314_protein_properties.tab) (Skrzypek et al. 2017) on 27-Jul-2020	Codon adaptation index	covering 5,919 genes
Sequence variation	Wang et al. 2018	Number of SNPs per nucleotide (normalized)	covering 6,409 genes
Synthetic sick/lethal paralogs in S. cerevisiae	Costanzo et al. 2016	Ortholog is duplicated in S. cerevisiae and sister paralogs are synthetic sick/lethal	covering 6,638 genes (categorical attribute: in the search space of 4,012 C. albicans genes having S. cerevisiae orthologs, 98 genes were annotated with “1”. The other genes in the search space were annotated with “-1”, and the rest genes outside the search space were annotated with “0”.)
Ortholog essentiality in S. cerevisiae	Winzeler et al. 1999	Ortholog is essential in S. cerevisiae	covering 6,638 genes (categorical attribute: in the search space of 4,012 C. albicans genes having S. cerevisiae orthologs, 992 genes were annotated with “1”. The other genes in the search space were annotated with “-1”, and the genes outside the search space were annotated with “0”.)
Length	Segal et al. 2018	Total length of ORF coding sequence (intron-free)	covering 5,893 genes
Hits		Number of insertion sites within the ORF
Reads		Number of reads within the ORF
Freedom index		Length of longest insertion-free interval divided by ORF length
Neighborhood index		Insertion index normalized to the noncoding window (hits divided by length)
Upstream hits 100		Number of hits within 100 bp upstream of ORF start codon

## Sheet: Predictions
Feature name	Gene expression level	Gene expression variance	Co-expression degree	CAI	Sequence variation	Synthetic sick/lethal paralogs in S. cerevisiae	Ortholog essentiality in S. cerevisiae	Length	Hits	Reads	Freedom index	Neighborhood index	Upstream hits 100	GRACE (1: E; -1 NE)	GRACEv2 (1: E; -1 NE)	RF prediction (1: E; -1 NE)	RF prediction score
C5_00150C_A	140.81	12955.6	2	0.23	0.00183936	0	1	1632	4	318	0.641544	0.0460526	3	1		1	0.950776
CR_09950C_A	321.46	155507	194	0.36	0.00193548	0	1	1551	3	27	0.646035	0.0373711	0	1		1	0.946423
CR_01760C_A	233.34	39110.9	164	0.29	0.00056243	0	1	1779	2	2	0.57448	0.0228202	0	1		1	0.939182
C5_00660C_A	150.71	42857.8	1	0.3	0.00126103	0	1	1587	4	249	0.511657	0.0337462	0	1		1	0.930768
C1_01530C_A	167.08	17908.8	231	0.36	0.00107066	0	1	1869	3	81	0.433387	0.0365852	0	1		1	0.927117
C6_00370C_A	297.47	100858	194	0.36	0.00322581	0	1	1551	3	58	0.934236	0.0244963	0	1		1	0.927093
C2_03160C_A	159.78	24167.9	0	0.41	0.00234009	0	1	2565	3	5	0.881481	0.0267327	0	1		1	0.926072
C4_06830C_A	126.2	12752.4	122	0.25	0.00178678	0	1	1680	6	506	0.429762	0.0467354	0	1		1	0.925686
C1_02790W_A	264.92	60454	245	0.24	0	0	1	1053	2	3	0.946819	0.0326169	0	1		1	0.922092
C1_08090C_A	171.23	20284.4	21	0.33	0.000655093	0	1	3054	5	250	0.521611	0.015324	1	1		1	0.91289
C1_12050W_A	123.93	11121	9	0.23	0.00174947	0	1	2859	5	257	0.838405	0.0296609	1	1		1	0.911885
C1_06960W_A	220.35	43702.2	182	0.28	0.00110865	0	1	903	5	407	0.502769	0.0390945	0	1		1	0.911642
C2_09720W_A	175.62	14343.5	74	0.36	0.00277136	0	1	2166	5	12	0.634349	0.0183334	0	1		1	0.91131
CR_04660C_A	188.72	27501.3	1	0.41	0.00304507	0	1	1643	4	19	0.610113	0.0517074	1	1		1	0.911135
C7_01970C_A	312.59	48838	167	0.33	0	0	1	1173	2	7	0.946292	0.0165037	0	1		1	0.910324
C1_10620W_A	212.37	88297.9	314	0.3	0.00347463	0	1	1440	2	22	0.847222	0.0323699	0	1		1	0.906749
C1_14260C_A	238.5	180857	46	0.29	0.00238379	0	1	840	0	0	1	0	0	1		1	0.905478
CR_06150C_A	149.42	35548	6	0.39	0.00138122	0	1	1449	3	115	0.777778	0.0402792	0	1		1	0.902957
C1_11220C_A	165.69	19053.2	379	0.31	0.00425834	0	1	1410	3	3	0.639716	0.0397344	0	1		1	0.902845
C2_03060W_A	184.69	55826.6	39	0.25	0.00323887	0	1	1236	1	1	0.92233	0.0187809	0	1		1	0.902121
C4_01490W_A	84.11	7810.41	208	0.33	0.00304878	0	1	2625	5	47	0.525714	0.0368688	1	1		1	0.899725
C1_10790W_A	333.06	85927.3	3	0.39	0.00120968	0	1	2481	3	338	0.904474	0.0195255	0	1		1	0.898724
C4_02980W_A	209.47	25689.3	108	0.32	0.00244101	0	1	1230	1	155	0.915447	0.00996928	0	1		1	0.897395
C3_01990W_A	145.17	22606.5	71	0.28	0.00160772	0	1	1245	5	166	0.91245	0.0381979	2	1		1	0.896755
CR_06340C_A	689.13	642815	21	0.55	0.000605327	0	1	1653	0	0	1	0	0	1		1	0.896322
C5_00110C_A	227.96	26270.3	103	0.32	0.00283019	0	1	2121	7	361	0.49505	0.0568586	5	1		1	0.893399
CR_00520C_A	41.27	6704.9	115	0.25	0.00154369	0	1	3240	5	214	0.508642	0.0368656	0	1		1	0.893271
C7_03670W_A	264.43	40523.2	90	0.42	0.00361882	0	1	1659	0	0	1	0	1	1		1	0.89324
C6_03720W_A	117.71	5920.18	176	0.32	0.00309385	0	1	2910	1	80	0.834021	0.00317007	5	1		1	0.892453
CR_01690C_A	168.48	16676.7	30	0.35	0.00364409	0	1	3294	4	81	0.632058	0.0257079	4	1		1	0.891157
C1_12770W_A	84.06	5352.56	208	0.33	0.00429799	0	1	2793	3	240	0.872538	0.0225564	0	1		1	0.89032
C3_00250C_A	144.44	37739.5	111	0.22	0.00313972	0	1	1275	3	65	0.753725	0.0283503	1	1		1	0.889707
C2_09520C_A	147.86	18494.8	86	0.23	0.00126582	0	1	1581	4	84	0.683112	0.0200035	3	1		1	0.888917
C1_08360C_A	1338.41	1.32822e+06	2	0.36	0.000684932	0	1	1461	4	203	0.557837	0.0486157	0	1		1	0.886626
C3_01720C_A	68.89	4154.26	12	0.25	0.0010914	0	1	3666	13	569	0.489362	0.0382806	0	1		1	0.88612
C3_00290W_A	234.18	93026.7	21		0.00071582	0	1	1326	4	137	0.721719	0.0434228	0	1	1	1	0.885876
CR_00800C_A	41.25	6408.47	288	0.2	0.00216763	0	1	2769	8	248	0.703142	0.0632187	0	1		1	0.88563
C6_02220W_A	235.75	45334.8	41	0.27	0.00273973	0	1	731	0	0	1	0	0	1		1	0.884965
C3_01560W_A	40.73	4216.8	341	0.23	0.00173686	0	1	2304	4	190	0.694878	0.0217153	0	1		1	0.884446
C5_05120W_A	132.81	27237.5	76	0.29	0.00503461	0	1	1590	3	18	0.754088	0.0268317	1	1		1	0.884406
C4_02280W_A	131.58	10985.1	200	0.31	0.00234192	0	1	855	1	83	0.987135	0.0170493	0	1		1	0.883272
CR_04170W_A	86.73	12279.6	287	0.22	0.00107759	0	1	1857	4	38	0.41734	0.0353785	0	1		1	0.881937
C1_02710W_A	211.83	28991.5	264	0.32	0.00402685	0	1	1491	2	3	0.612341	0.0316887	2	1		1	0.880044
C5_02170C_A	250.81	64495.1	125	0.31	0.000623441	0	1	1605	4	189	0.645483	0.0192719	5	1		1	0.878717
CR_04810W_A	1445.77	1.44926e+06	186	0.62	0.0013245	0	1	756	1	1	0.539683	0.0307433	0	1		1	0.877731
C1_13030C_A	74.07	5892.93	105	0.25	0.00255864	0	1	2346	3	57	0.563086	0.036789	0	1		1	0.87713
CR_00580W_A	290.74	49861	277	0.41	0.0031348	0	1	639	0	0	1	0	0	1		1	0.876865
C3_06030W_A	81.23	15559.6	341	0.32	0.000520291	0	1	1923	7	195	0.814353	0.034047	2	1		1	0.873225
C2_00380C_A	103.31	10898.5	2	0.22	0.00106724	0	1	1875	4	119	0.570133	0.0273122	1	1		1	0.869983
CR_02000C_A	84.74	22978.8	0	0.33	0.00413223	0	1	1695	2	2	0.469617	0.0344986	0	1		1	0.867943
C2_05710C_A	2839.47	5.56241e+06	206	0.66	0.00256739	0	1	780	1	11	0.987654	0.0517722	0		1	1	0.863999
C1_08740C_A	140.81	14013.6	3	0.27	0.00251256	0	1	2787	3	3	0.686401	0.010588	0	1		1	0.862782
C1_03370W_A	484.87	142272	137	0.57	0.00211752	0	1	1890	2	36	0.824868	0.0198355	0	1		1	0.861134
C1_03520W_A	159.18	168353	38	0.22	0.00346021	0	1	1446	5	635	0.437759	0.0510414	0	1		1	0.860113
C1_14240W_A	72.38	4074.39	86	0.23	0.00118694	0	1	1686	3	229	0.639976	0.0378402	0	1		1	0.857844
C3_07410C_A	302.81	73355.9	106	0.53	0	0	1	1785	1	1	0.971429	0.00413485	1	1		1	0.857145
C1_05240C_A	140.88	140818	11	0.23	0	0	1	1335	2	189	0.958052	0.0228875	0	1		1	0.856998
C1_08590C_A	109.75	65028.5	20	0.22	0.000671141	0	1	1491	6	279	0.934943	0.0552754	0	1		1	0.853747
C1_00710C_A	248.41	65501	19	0.46	0.000578704	0	1	1729	2	2	0.375556	0.0261095	0	1		1	0.853636
C4_06810C_A	52.74	25446.6	25	0.21	0.00156087	0	1	1923	7	483	0.380655	0.0452295	0	1		1	0.851822
C2_09380W_A	74.62	33230.4	289	0.23	0.00260756	0	1	768	3	55	0.924479	0.0391208	0		1	1	0.850763
C7_00570W_A	74.33	6878.86	180	0.27	0.000857143	0	1	3501	6	94	0.328478	0.0152633	0	1		1	0.850687
C4_05010W_A	40.1	6605.47	328	0.19	0.00513149	0	1	1560	3	246	0.951923	0.0133913	0	1		1	0.850501
C4_02780W_A	118.78	8070.95	124	0.23	0.00244798	0	1	1635	3	114	0.840979	0.0372315	0	1		1	0.850415
CR_03030C_A	3765.17	1.2359e+07	166	0.61	0.00125	0	1	801	0	0	1	0	0	1		1	0.849829
C1_03210C_A	121.88	19196.4	41	0.3	0	0	1	1356	0	0	1	0	1	1		1	0.84852
C2_05100C_A	180.37	1.19034e+06	392	0.35	0	0	1	1311	4	60	0.456903	0.0423873	1	1		1	0.847802
C3_00720W_A	202.42	280254	3	0.7	0.00148865	0	1	2688	2	3	0.522321	0.0124538	0	1		1	0.847394
CR_08950W_A	183.81	21615.6	0	0.24	0	0	1	1242	0	0	1	0	0		-1	1	0.847305
CR_06750C_A	172.83	37444.9	43	0.21	0.00521512	0	1	768	0	0	1	0	0	1		1	0.847128
C4_00220C_A	303.04	71201.5	0	0.48	0.00217391	0	1	1381	3	3	0.415515	0.0280985	0	1		1	0.847032
C5_00190C_A	315.22	63543.6	5	0.4	0.00310813	0	1	6114	5	32	0.489859	0.0139223	0	1		1	0.846203
C1_09710C_A	45.81	20848.3	290	0.17	0.00315856	0	1	1584	6	35	0.830177	0.0524316	0	1		1	0.844968
CR_04000W_A	150.83	20201.7	36	0.24	0.00155521	0	1	1287	1	1	0.609169	0.0148775	0	1		1	0.844519
C3_06500W_A	117.48	11320	24	0.3	0.00130506	0	1	3066	4	4	0.575995	0.0124934	2	1		1	0.844211
C5_01580C_A	813.89	482102	6	0.64	0.00348985	0	1	3153	4	40	0.478909	0.0108448	0	1		1	0.843402
CR_03170W_A	216.02	18183.8	65	0.42	0.0046083	0	1	1737	3	3	0.496834	0.0276258	3	1		1	0.843076
C3_02280C_A	125.55	24391.2	18	0.34	0.0032695	0	1	2142	2	2	0.548553	0.00902208	0	1		1	0.842935
CR_05650W_A	41.97	11182.9	2	0.16	0.00361228	0	1	1662	5	104	0.552347	0.0541912	0	1		1	0.841641
C5_03070W_A	1700.19	2.73293e+06	168	0.73	0	0	1	678	0	0	1	0	0	1		1	0.840975
C3_00770C_A	147.12	37122.5	46	0.24	0.00134589	0	1	744	0	0	1	0	2	1		1	0.840511
CR_06490C_A	249.59	99639.7	48	0.47	0.00294118	0	1	1701	3	98	0.531452	0.0255078	3	1		1	0.839433
C6_04520W_A	208.87	30487.2	17	0.34	0.00061237	0	1	3267	6	43	0.409244	0.0106848	11	1		1	0.839355
C3_05160C_A	40.69	2726.32	342	0.22	0.00146735	0	1	2727	8	493	0.535387	0.0150747	28	1		1	0.839039
C3_02780W_A	245.52	32545.8	263		0.00145349	0	1	1377	1	35	0.535221	0.00570885	0	1		1	0.838875
C2_01670C_A	76.51	7607.44	19	0.22	0.0022173	0	1	2256	5	306	0.654255	0.0500641	3	1		1	0.838718
C5_04750C_A	106.46	40836.3	305	0.25	0.0023571	0	1	1698	2	7	0.600118	0.0125819	0	1		1	0.838675
C7_01030C_A	44.03	3760.7	305	0.25	0.00383247	0	1	3654	15	650	0.314176	0.047032	2	1		1	0.837466
C5_05380W_A	125.79	18285.8	6	0.24	0.00145349	0	1	1377	2	263	0.642702	0.0190623	4	1		1	0.836482
C2_08780W_A	165.03	187360	23	0.26	0.00165975	0	1	1206	3	694	0.953566	0.0193536	2	1		1	0.836308
CR_05550C_A	36.64	10279.5	125	0.23	0.00143968	0	1	3474	9	155	0.320092	0.0472374	0	1		1	0.833831
C2_05340C_A	84.08	8411.74	326	0.23	0.0029703	0	1	1011	1	1	0.847676	0.0143015	0	1		1	0.833271
C5_02030W_A	128.51	49499.5	32	0.22	0.00302419	0	1	993	3	131	0.573011	0.0232241	0	1		1	0.832294
C4_02830C_A	39.39	3347.16	355	0.2	0.00391815	0	1	2298	7	505	0.558747	0.0321022	1	1		1	0.831422
C5_04700C_A	121.83	13047.5	57	0.33	0.00578807	0	1	2247	9	535	0.494882	0.0458049	11	1		1	0.831283
C2_07380W_A	559.08	170664	52	0.58	0.00308325	0	1	1947	4	11	0.380586	0.023055	0	1		1	0.831129
C2_05750W_A	37.87	6486.27	357	0.22	0	0	1	1251	3	185	0.581934	0.0396357	0	1		1	0.831009
CR_04380C_A	95.26	7133.34	10	0.25	0.00174947	0	1	2859	2	28	0.674012	0.0153457	0	1		1	0.829505
C4_05630W_A	121.34	47046.9	4	0.21	0.00104602	0	1	957	3	273	0.83908	0.0289632	0	1		1	0.827666
C1_03560C_A	155	159512	0	0.2	0.000967118	0	1	1035	3	72	0.525604	0.0525432	0	1		1	0.827615
C1_05290W_A	223.43	29983.6	24	0.34	0.00255363	0	1	1959	2	16	0.476774	0.0102439	0			1	0.826705
C1_03350C_A	133.44	19344.4	410	0.37	0.000535332	0	1	1869	0	0	1	0	0	1		1	0.825937
C7_00550C_A	84.56	6687.28	31	0.3	0.000833681	0	1	2400	1	1	0.85125	0.00408693	6	1		1	0.825668
C7_01810W_A	133.78	12257.7	9	0.26	0.00467914	0	1	1497	4	386	0.705411	0.0226128	0	1		1	0.825156
CR_07950W_A	92.54	34299	233	0.19	0.00117509	0	1	852	5	378	0.924883	0.0417626	0	1		1	0.825028
C2_06820C_A	175.47	60345.3	8	0.27	0	0	1	858	0	0	1	0	0	1		1	0.824765
C5_05490C_A	174.51	51752.4	74	0.25	0.00465116	0	1	1506	0	0	1	0	11		1	1	0.824594
C3_04380C_A	453.61	5.56526e+07	225	0.59	0	0	1	381	0	0	1	0	0	1		1	0.82439
C7_00620W_A	169.59	12437	115	0.47	0.000918695	0	1	2178	2	62	0.515152	0.0129017	1	1		1	0.823957
C2_06310C_A	825.76	280949	50	0.54	0.00621118	0	1	645	0	0	1	0	0	1		1	0.823895
CR_07080W_A	302.57	469027	20	0.37	0	0	1	738	1	345	0.903794	0.0183454	0	1		1	0.821344
CR_02860W_A	317.3	84446.8	1	0.54	0	0	1	597	0	0	1	0	0	1		1	0.821258
C3_01000W_A	31.08	4218.76	324	0.23	0.00110132	0	1	3633	6	97	0.476466	0.0223188	3	1		1	0.821185
C2_05460W_A	1878.42	1.37957e+07	29	0.66	0.001321	0	1	1515	2	2	0.565677	0.0213342	0	1		1	0.821114
C5_01690C_A	90.71	7500.32	206	0.21	0.00242571	0	1	1650	9	866	0.869091	0.049973	0	1		1	0.821054
CR_05520W_A	68.53	11908.8	276	0.23	0.000466418	0	1	2145	9	569	0.782284	0.0529513	11	1		1	0.820619
C2_07490W_A	148.7	25026.5	1	0.22	0.000862069	0	1	1161	2	111	0.687339	0.0191599	1		-1	1	0.819671
CR_10300W_A	248.5	151784	5	0.23	0	0	1	819	1	15	0.89011	0.0327965	3	1		1	0.819229
C7_00390W_A	203.66	49096.3	2	0.24	0	0	1	1467	2	2	0.463531	0.0122754	12	1		1	0.815814
C3_02490C_A				0.23	0.00127845	0	1	3909	23	1289	0.334612	0.0634368	0	1		1	0.813375
C5_05340W_A	131.99	33327.9	131	0.2	0.00240577	0	1	1248	3	151	0.991186	0.023571	2	1		1	0.813127
C1_08560W_A	129.69	9930.59	106	0.27	0.00120192	0	1	1665	1	1	0.861862	0.00835994	0	1		1	0.812208
C6_00870C_A	523.02	400809	0	0.69	0.00249584	0	1	1203	3	21	0.46384	0.0511853	0	1		1	0.81212
C1_04130W_A	42.55	3416.76	308	0.27	0.00588466	0	1	2550	3	8	0.560784	0.0224032	0	1		1	0.811686
C1_02640C_A	225.82	30100	277	0.31	0	0	1	516	0	0	1	0	0		-1	1	0.811614
CR_09800C_A	35.08	4977.27	331	0.24	0.00114591	0	1	2619	8	353	0.583047	0.0639578	1	1		1	0.811575
CR_10680W_A	80.42	6313.97	18		0.000964134	0	1	5187	14	1371	0.378061	0.0543889	0	1		1	0.811021
C1_10660W_A	146.45	141618	0	0.2	0.00139665	0	1	717	0	0	1	0	0	1		1	0.810252
C1_00110W_A	198.85	71675.1	40	0.22	0.00431566	0	1	1623	4	213	0.375847	0.0643364	0	1		1	0.809769
C7_04130C_A	290.08	54843.1	84	0.29	0.00236686	0	1	846	1	63	0.861702	0.0121095	1	1		1	0.80975
C4_06720W_A	410.59	159864	224	0.48	0.00421053	0	1	951	2	17	0.726604	0.0275287	0		1	1	0.809617
C6_02260C_A	72.06	3463.96	32	0.24	0.00212841	0	1	2820	1	1	0.692908	0.00591798	0	1		1	0.808044
C3_01860C_A	115.68	11655.6	55	0.26	0	0	1	1623	3	38	0.798521	0.0206743	0	1		1	0.807976
C6_03640W_A	57.82	1.13355e+06	415	0.26	0.00363306	0	1	2200	7	442	0.575531	0.047462	1	1		1	0.807188
CR_04080C_A	85.5	23710.2	25	0.22	0.000494805	0	1	2022	3	3	0.697824	0.0292871	1	1		1	0.806366
C1_13580W_A	37.39	2309	106	0.23	0.00083682	0	1	2391	3	23	0.780427	0.0326843	0	1		1	0.806285
CR_07650W_A	155.39	28274.3	2	0.22	0	0	1	993	2	2	0.717019	0.021018	0			1	0.805969
CR_09120C_A	252.91	155780	30	0.52	0	0	1	1561	3	3	0.323682	0.0666785	0	1		1	0.805693
C6_04160C_A	35.6	3911.42	327	0.23	0.00433583	0	1	2538	12	901	0.411348	0.0481643	0	1		1	0.805138
C3_04060C_A	213.69	620357	33	0.29	0.00102987	0	1	972	1	6	0.925926	0.00333906	28	1		1	0.805041
C3_02130W_A	35.59	2338.39	372	0.21	0.00493052	0	1	2232	5	222	0.545699	0.018428	0	1		1	0.804741
C7_03660C_A	176.02	14867.3	133	0.38	0.00626506	0	1	2076	5	52	0.362717	0.0275595	0	1		1	0.8045
C4_06500W_A	44.94	1665.64	7	0.23	0.00439975	0	1	3183	8	46	0.428527	0.0371328	0	1		1	0.803418
C2_03010C_A	456.83	182993	0	0.43	0.0016116	0	1	1242	1	1	0.512077	0.0170295	0	1		1	0.803376
CR_05050W_A	916.77	1.22079e+06	0	0.42	0.000892061	0	1	1122	0	0	1	0	1		1	1	0.802566
C1_09510W_A	72.03	11673.5	353	0.18	0.00214286	0	1	1401	1	6	0.684511	0.0171562	0	1		1	0.801888
C1_01590C_A	72.68	7577.27	9	0.28	0.00107991	0	1	3705	4	11	0.344939	0.0208737	0	1		1	0.801596
C1_04830W_A	80.11	3930.82	10	0.29	0.00355872	0	1	2811	3	3	0.689079	0.017169	3	1		1	0.801443
C2_04580W_A	130.75	14223	65	0.3	0.00189573	0	1	1056	0	0	1	0	0	1		1	0.801392
C1_03500W_A	300.87	650972	1	0.32	0.00321027	0	1	624	0	0	1	0	0	1		1	0.800379
CR_00640W_A	160.09	1.44223e+07	2	0.35	0.00278797	0	1	6816	5	12	0.539026	0.0183432	0		1	1	0.800015
CR_04550W_A	225.02	46051.1	17	0.21	0.00320513	0	1	937	2	15	0.730412	0.0497293	7	1		1	0.799776
C2_03270W_A	2327.03	1.50506e+07	28	0.67	0.00134048	0	1	747	0	0	1	0	0	1		1	0.799022
CR_04240C_A	60.4	3891.31	269	0.23	0.000639386	0	1	3129	2	2	0.534356	0.0131313	0	1		1	0.797506
CR_02520W_A	68.88	16344.3	397	0.19	0.00759494	0	1	396	0	0	1	0	0	1		1	0.796974
C3_05100C_A	2093.7	7.96116e+06	244	0.69	0.00294406	0	1	1020	4	221	0.641711	0.031506	0		1	1	0.795101
C6_01890C_A	47.42	3346.97	346	0.2	0.00348028	0	1	1725	4	181	0.582029	0.0277617	5	1		1	0.794695
C3_07250W_A	69.34	4542.44	57	0.23	0.0033289	0	1	1503	0	0	1	0	0	1		1	0.794018
C1_07110W_A				0.18	0.001321	0	1	3783	19	1317	0.364526	0.043701	0	1		1	0.792871
CR_06120W_A	65.24	12776.1	373	0.22	0.0011274	0	1	888	2	13	0.540541	0.0440878	0	1		1	0.792276
C1_08450C_A	193.35	53269.5	54	0.24	0.00173913	0	1	576	0	0	1	0	0		1	1	0.789999
CR_04140W_A	91.06	9416.63	385	0.23	0.000722022	0	1	1386	5	32	0.386003	0.065486	0	1		1	0.789878
C7_00690W_A	56.53	20623.9	363	0.25	0.00498132	0	1	804	1	74	0.978856	0.0172118	0	1		1	0.789404
C2_10710W_A	494.78	207128	214	0.32	0	0	1	465	2	41	0.913978	0.0278728	0	1		1	0.789196
CR_09160C_A	297.05	68239.6	41	0.41	0	0	1	1356	1	1	0.608407	0.0206629	2	1		1	0.788995
C5_02120C_A	30.73	2510.83	211	0.17	0.00322191	0	1	2484	6	410	0.445652	0.0256195	0	1		1	0.788681
C6_01700W_A	2957.87	4.74971e+06	189	0.63	0.00358423	0	1	838	1	34	0.527778	0.0428686	0		1	1	0.787287
C2_07350W_A	38.66	10958.2	10	0.22	0.00265554	0	1	2637	1	7	0.989382	0.00494762	0	1		1	0.786815
C7_01790C_A	2071.9	6.0132e+06	176	0.69	0	0	1	897	1	2	0.531773	0.00891476	1	1		1	0.78618
C6_01970C_A	3740.37	6.14828e+06	230	0.59	0.00572738	0	1	874	0	0	1	0	1		1	1	0.785366
C4_07060W_A	42.04	1785.92	75	0.23	0.00161068	0	1	4347	12	1187	0.508627	0.0243867	2	1		1	0.785363
CR_02110W_A	37.4	2069.46	20	0.24	0.00227101	0	1	2643	4	4	0.502081	0.0346561	2	1		1	0.783634
C2_09320C_A	138.5	51597.7	347	0.27	0.00794101	0	1	1764	6	141	0.697279	0.0268352	1	1		1	0.783104
C5_03360W_A	133.09	1.61187e+06	414	0.28	0.00422833	0	1	474	0	0	1	0	0	1		1	0.782592
C1_01480C_A	2892.92	5.07858e+06	143	0.73	0.00133511	0	1	750	1	1	0.572	0.0438063	0	1		1	0.780332
CR_01750C_A	212.29	19257.5	0	0.25	0.00158228	0	1	633	0	0	1	0	3	1		1	0.779872
C1_04390C_A	58.21	9431.17	260	0.24	0.0058427	0	1	2226	1	65	0.966757	0.00694444	3	1		1	0.779016
C1_10970W_A	35.46	2249.44	294	0.22	0.00049554	0	1	2019	3	163	0.935612	0.0242591	6	1		1	0.777827
C6_00670W_A	33.45	58672	21	0.16	0.0011744	0	1	1704	5	796	0.397176	0.0486414	0	1		1	0.777534
C6_00650C_A	1713.63	3.05724e+06	191	0.64	0.00582072	0	1	860	1	1	0.879386	0.0364446	1		1	1	0.776351
C4_04900W_A	2846.66	5.12469e+06	224	0.6	0.00399202	0	1	502	0	0	1	0	0		1	1	0.776227
C2_07340W_A	41.15	3830.2	376	0.18	0.00236967	0	1	1689	4	79	0.60746	0.0299728	1	1		1	0.775595
C2_10360C_A	62.35	10716.2	0	0.24	0.000978474	0	1	1023	4	16	0.577713	0.0583122	0	1		1	0.774019
C4_02140C_A	244.67	61118.5	152	0.4	0	0	1	276	1	3	0.847826	0.0448718	4	1		1	0.77347
C1_13780W_A	40.47	3030.32	72	0.29	0.00106724	0	1	4686	4	123	0.507042	0.0188085	0		-1	1	0.772647
C2_04680W_A	94.65	236651	204	0.22	0	0	1	465	1	1	0.993548	0.0494883	0	1		1	0.772265
C4_00520W_A	68.66	28940.1	283	0.16	0	0	1	474	0	0	1	0	0	1		1	0.772031
CR_03200C_A	16.8	949.462	259	0.15	0.00213767	0	1	2340	6	373	0.75812	0.0499121	1	1		1	0.771935
C7_01450C_A	124.77	17177.1	220	0.29	0.00135196	0	1	2220	2	2	0.641441	0.0105858	0	-1		1	0.771597
C1_12350W_A	30.96	1625.11	245	0.21	0.00232249	0	1	3015	3	168	0.704478	0.0242102	3	1		1	0.771478
C4_02470C_A	148.91	51271.9	34	0.2	0.00407056	0	1	738	1	1	0.704607	0.0207715	0	1		1	0.771361
C2_02430W_A	40.18	3311.51	338	0.2	0.00212164	0	1	2829	0	0	1	0	0			1	0.770754
CR_05660W_A	49.31	5797.95	315	0.21	0.00175516	0	1	2280	10	612	0.587719	0.0729723	0	1		1	0.769964
C2_02710C_A	72.92	15437	426	0.16	0.00118765	0	1	843	0	0	1	0	0	1		1	0.769283
C2_09430W_A	2200.1	3.24675e+06	136	0.73	0.000855432	0	1	1170	4	238	0.947009	0.0446991	0	1		1	0.76887
C4_01770W_A	133.8	14071.9	8	0.29	0	0	1	780	0	0	1	0	1	1		1	0.768708
C1_04040C_A	29.82	4885.2	374	0.2	0.00462535	0	1	2163	3	13	0.927878	0.030895	0	1		1	0.768636
C3_04900W_A	25.19	2028.32	258	0.22	0.00316456	0	1	2529	15	603	0.410834	0.0265102	2	1		1	0.766398
C7_02790C_A	32.04	7275.16	0	0.22	0.00160462	0	1	3117	4	53	0.474816	0.0125243	9	1		1	0.765287
CR_08490W_A	69.65	16553.5	292	0.17	0.00158228	0	1	2529	3	4	0.551601	0.0148775	0	1		1	0.760375
C4_06570C_A	2255.23	3.18211e+07	25	0.6	0.00587199	-1	-1	1704	1	1	0.626761	0.00674391	0	1		1	0.75956
C1_00950C_A	57.28	2641.53	6	0.22	0.00101989	0	1	1962	4	17	0.349643	0.0389203	1	1		1	0.758796
C4_02790C_A	37.33	7837.68	230	0.22	0.00590319	0	1	1695	1	9	0.79823	0.010207	2	1		1	0.758541
C2_05230C_A	60.3	6987.4	388	0.23	0.00203459	0	1	984	2	17	0.884146	0.0357366	3	1		1	0.757466
C1_14080W_A	39.59	1518.34	107	0.21	0.00274927	0	1	5457	9	312	0.69617	0.0366367	3	1		1	0.757281
C7_04020C_A	179.85	67600.1	7	0.19	0.00587544	0	1	852	4	272	0.960094	0.0442704	0	1		1	0.756785
C5_05410C_A	188.32	49878.3	7	0.32	0.00395704	0	1	1770	3	89	0.79548	0.0203937	7	-1		1	0.755221
C5_02550C_A	32.38	2720.74	410	0.19	0.00500208	0	1	2400	8	375	0.27375	0.0248054	0	1		1	0.755015
C1_12380C_A	75.87	146590	200	0.2	0	0	1	1275	1	1	0.832157	0.0160825	0	1		1	0.754999
C2_05090W_A	39.95	6.8154e+08	236	0.19	0.00255537	0	1	2349	3	339	0.469136	0.0183219	0	1		1	0.754589
C4_07190W_A	40.13	16179	0	0.13	0.00381841	0	1	2358	6	529	0.72307	0.0364626	0	1		1	0.754318
CR_08150W_A	3148.9	5.03678e+06	259	0.76	0	0	1	360	1	1	0.616667	0.0221023	0	1		1	0.753781
C1_04210C_A	119.09	293986	75	0.31	0.002149	0	1	1400	1	1	0.50272	0.013815	0		1	1	0.751932
C5_04090C_A	410.29	160631	50	0.42	0	0	1	330	0	0	1	0	0	1		1	0.751239
C2_08810C_A	843.86	302979	4	0.6	0.00577367	0	1	867	2	20	0.67474	0.0181502	0	1		1	0.750386
C6_02360W_A	59.35	6687.91	350	0.17	0.00183486	0	1	546	0	0	1	0	0	1		1	0.749898
C4_04120C_A	14.6	639.206	133	0.17	0.00211416	0	1	1896	7	407	0.798523	0.047665	0	1		1	0.748919
C1_13700W_A	1365.21	868711	1	0.73	0	0	1	1789	2	35	0.681698	0.0325976	0		1	1	0.748145
C7_02780W_A				0.16	0.00135044	0	1	1479	6	585	0.958756	0.040274	2	1		1	0.747697
CR_06840W_A					0.00185787	0	1	2151	8	13	0.384472	0.0406466	0	1		1	0.747324
CR_08910C_A	110.74	17006.8	24	0.23	0	0	1	1203	1	1	0.537822	0.0323762	1	1		1	0.747276
C5_00070W_A	94.55	213270	8	0.28	0.000827815	0	1	1209	1	18	0.889165	0.0110666	4	1		1	0.746179
C4_06210C_A	91.46	2.10908e+06	406	0.27	0.00506329	0	1	1581	3	267	0.889943	0.0155914	0	1		1	0.745135
C1_08290C_A	36.49	7699.58	347	0.18	0.00339559	0	1	2946	11	103	0.391378	0.0408989	0	1		1	0.742809
C1_05720W_A	1765.59	4.46131e+06	197	0.73	0.00260247	1	0	1538	0	0	1	0	0		1	1	0.742076
C1_14090W_A	283.15	356481	56	0.53	0.00524934	0	1	382	0	0	1	0	1		1	1	0.742023
CR_06720W_A	82.38	12685.5	247	0.28	0.00640205	0	1	1563	2	13	0.516955	0.0108696	0	1		1	0.740931
C1_02460W_A	3256.79	7.53036e+06	20	0.65	0.00151057	0	1	663	1	1	0.696833	0.044983	0		1	1	0.739713
C3_07390C_A	82.81	34491.6	352	0.23	0	0	1	705	2	200	0.859574	0.0214259	13		-1	1	0.738175
C4_03090W_A	61.64	20136	2	0.2	0.00362757	0	1	828	2	5	0.899758	0.0313491	0	1		1	0.737911
C4_03790W_A	38.76	1637.24	234	0.22	0.00382556	0	1	1308	6	120	0.586391	0.0388754	0	1		1	0.736968
CR_10240W_A	66.3	6805.72	357	0.2	0.00104712	0	1	1911	8	533	0.642595	0.0726509	0	1		1	0.736803
CR_04780W_A	70.46	37301	272	0.15	0	0	1	447	0	0	1	0	0	1		1	0.73525
CR_09380W_A	166.42	38358.7	5	0.16	0	0	1	903	1	1	0.842593	0.043953	0	1		1	0.733898
C4_03030C_A	41.38	3203.51	353	0.18	0.00635173	0	1	2520	2	52	0.996429	0.01081	2	1		1	0.732106
C2_08180C_A	34.56	3777.37	367	0.21	0.00275292	0	1	1454	4	435	0.72283	0.0370992	0		-1	1	0.731588
C7_03630C_A	73.83	18704.9	100	0.41	0.00275482	0	1	364	1	2	0.886364	0.0353922	0	1		1	0.731464
CR_07750C_A	29.11	1822.55	303	0.17	0.00384615	0	1	1821	6	259	0.49698	0.0287002	1	1		1	0.731424
C2_09270C_A	106.64	48165.6	8	0.26	0.00402901	0	1	1242	0	0	1	0	6	1		1	0.729754
C1_10670C_A	49.22	3702.02	231	0.27	0.0030018	0	1	4998	7	59	0.271509	0.028651	0	1		1	0.727792
C2_02460W_A	44.53	4266.94	0	0.17	0.00274474	0	1	2187	5	221	0.98674	0.052077	0	1		1	0.727677
C5_03790W_A	88.28	7896.63	354	0.31	0.00699301	0	1	573	1	56	0.739965	0.0194233	0	1		1	0.727404
C3_04560W_A	59.05	8469.5	259	0.24	0.0028125	0	1	3201	29	1404	0.29522	0.0189615	6	1		1	0.726677
C4_03040W_A	165.49	587670	167	0.29	0	0	1	219	1	1	0.885845	0.0665035	1	1		1	0.725348
C2_07960C_A	49.03	17872.3	229	0.16	0.000819672	0	1	1221	4	100	0.886978	0.031122	1		1	1	0.725194
C6_02320C_A				0.14	0.00565327	0	1	1587	4	22	0.515438	0.0470326	0	1		1	0.725141
C6_03900W_A	47.29	3722.46	19	0.16	0.00626043	0	1	2397	5	285	0.513976	0.017428	2	1		1	0.72468
C3_07440W_A	1478.61	6.2473e+06	31	0.53	0	0	1	747	1	59	0.749665	0.00940589	0		-1	1	0.7245
CR_02970C_A	33.5	1582.86	1	0.18	0.0015804	0	1	2532	1	261	0.915482	0.00880677	0	1		1	0.724196
C4_02090C_A	45.97	3261.79	305	0.15	0.00138504	0	1	723	0	0	1	0	0	1		1	0.723845
CR_00100C_A	55.86	18108.6	3	0.12	0.00309597	0	1	2262	6	463	0.405836	0.0612907	0	1		1	0.722334
C1_13900C_A	66.7	3751.15	118	0.19	0.00292569	0	1	1710	1	1	0.888304	0.0157394	0	1		1	0.722299
C2_01530C_A	64.04	13152.6	2	0.21	0.00186567	0	1	2145	2	2	0.631235	0.0137251	1	1		1	0.720415
C2_10860C_A	194.06	50759.5	2	0.25	0.00552995	0	1	1086	3	7	0.538674	0.046992	3		-1	1	0.720359
C1_11170W_A	121.65	8464.85	11	0.22	0.00380807	0	1	1314	5	389	0.601218	0.0658917	0	1		1	0.719891
C1_03310W_A	74.35	9145.24	0	0.2	0.00264085	0	1	1137	0	0	1	0	0	1		1	0.719721
CR_10550W_A	61.15	6089.32	263	0.2	0.00217273	0	1	1842	5	1307	0.893594	0.0654381	10	1		1	0.718772
C1_12820C_A	59.74	17877.9	43	0.22	0.0021097	0	1	949	0	0	1	0	1	1		1	0.718665
C4_01080W_A	28.92	1388.81	206	0.21	0.00309704	0	1	2907	6	402	0.831785	0.0558623	2	1		1	0.718152
C1_01050C_A	112.86	19348	6	0.25	0.0010661	0	1	939	0	0	1	0	5	-1		1	0.717548
C2_00410C_A	23.06	7.14756e+08	201	0.16	0.00237404	0	1	3792	10	185	0.484441	0.0334484	0	1		1	0.717352
C1_12360C_A	129.19	193081	38	0.27	0.00160514	0	1	624	0	0	1	0	0	-1		1	0.717326
C4_06800W_A	93.54	6418.21	85	0.21	0.00363372	0	1	1377	1	18	0.992012	0.00918366	1	1		1	0.71729
CR_03990C_A	84.81	11763.6	157	0.18	0.00416089	0	1	1443	3	68	0.923077	0.0397074	1		1	1	0.717137
C7_04270C_A	60.68	38302.1	5	0.16	0.0108696	0	1	921	0	0	1	0	0	1		1	0.716407
C3_02020W_A				0.19	0.00158416	0	1	2526	15	2462	0.472288	0.0545595	1	1		1	0.716206
CR_04360C_A	265.69	72277.7	366	0.28	0	0	1	480	0	0	1	0	0	-1		1	0.716009
CR_01140C_A	43.22	24962.4	0	0.16	0.000961538	0	1	1041	0	0	1	0	0	1		1	0.715962
C4_01750C_A	2276.19	3.83643e+07	30	0.63	0.000926784	0	1	1080	2	3	0.824074	0.032318	0	1		1	0.715535
CR_02710W_A	26.16	1497.79	392	0.19	0.00363857	0	1	1650	1	18	0.912121	0.0162362	0	1		1	0.714276
C1_13860C_A	1198.67	921718	2	0.63	0.00274348	-1	-1	2188	3	3	0.434812	0.0451334	0	1		1	0.714005
CR_06050W_A	58.85	69936.2	6	0.17	0.00104932	0	1	954	4	50	0.443396	0.0577803	0	1		1	0.713776
C3_00560C_A	65.83	12522.9	286	0.16	0.000763359	0	1	1311	3	67	0.519451	0.0232931	1	1		1	0.713361
C2_04310W_A	256.36	111971	4	0.46	0.00165563	0	1	1209	1	6	0.989247	0.011145	1	-1		1	0.71236
C1_14460W_A	266.72	297167	5	0.14	0.00319829	0	1	939	5	1355	0.985091	0.0864794	5	1		1	0.712292
C1_10880W_A	52.73	4206.01	369	0.18	0.0015444	0	1	1296	1	261	0.891204	0.0175657	1	1		1	0.712168
C1_00900W_A	80.95	13860.9	379	0.22	0	0	1	618	0	0	1	0	0	1		1	0.711967
C4_06870W_A	185.3	62679.7	21	0.25	0.00309597	0	1	1293	6	315	0.279196	0.0608455	2	1		1	0.711818
C2_01220W_A	31	1212.62	200	0.2	0.00138792	0	1	2883	7	176	0.398196	0.0649477	1	1		1	0.711581
C3_00860W_A	50.55	9884.8	2	0.1	0.00314961	0	1	636	1	106	0.988994	0.0238226	0	1		1	0.711334
C4_03130W_A	26.67	7517.06	10	0.16	0.00214477	0	1	1866	5	162	0.931404	0.0268626	0	1		1	0.709705
C2_07320W_A	136.96	91809.3	0	0.22	0.00397141	0	1	1260	2	3	0.607143	0.0171248	0	-1		1	0.708966
C5_02710W_A	196.47	2.85323e+06	9	0.46	0.002079	0	1	963	2	15	0.843198	0.0122782	0	-1		1	0.708878
C5_04660C_A	51.29	8733.74	2	0.13	0.00662252	0	1	756	0	0	1	0	0	1		1	0.707668
C5_02230W_A	179.28	8.72354e+07	11	0.24	0.00239234	0	1	837	4	78	0.814815	0.0439807	0		1	1	0.707131
C2_03880C_A	57.31	40122.9	1	0.11	0.00221239	0	1	453	0	0	1	0	0			1	0.706692
C7_04190C_A	55.96	24242.4	313	0.18	0.00723764	0	1	1659	4	14	0.411091	0.0402502	10	1		1	0.706224
C1_13730C_A	21.94	1161.29	432	0.18	0	0	1	981	3	90	0.629969	0.0649403	0	1		1	0.705814
CR_03600C_A	108.41	19746.6	44	0.21	0.00332226	0	1	603	1	1	0.723051	0.0412095	0	1		1	0.704617
C2_03990W_A	70.68	9339.03	334	0.17	0.000911577	0	1	1098	1	17	0.892532	0.0181388	0	1		1	0.704615
C2_07310W_A	180.39	36173.3	55	0.24	0.00486027	0	1	1647	4	35	0.37037	0.0263003	2	-1		1	0.704207
C3_05370C_A	2040.89	2.76069e+06	128	0.66	0.00085034	1	0	1177	3	232	0.963104	0.0262824	0		1	1	0.70088
C1_00070W_A	223.13	52667	18	0.21	0.0070237	0	1	1140	1	4	0.998163	0.0338044	6	1		1	0.700839
C1_14150C_A	120.91	41189.1	126	0.16	0.00273973	0	1	366	1	31	0.830601	0.0650573	0	1		1	0.700356
C5_04570C_A	169.13	25543.9	205	0.34	0.00348635	-1	-1	1722	3	1189	0.722416	0.0234708	0	1		1	0.700263
C1_08500C_A	4122.65	3.5368e+07	25	0.68	0.00151286	1	0	1323	2	393	0.989418	0.0184692	0	1		1	0.700184
C7_02060W_A	30.22	17186.6	6	0.18	0.0040032	0	1	2499	8	258	0.486595	0.0291329	1	1		1	0.699917
C7_01470C_A	122	22074.3	15	0.25	0.0042735	0	1	937	4	208	0.565543	0.0545253	0		1	1	0.699148
C7_02680W_A	132.17	25322.9	129	0.26	0.0154867	0	1	453	1	31	0.737307	0.0220493	0	1		1	0.696994
C3_05530W_A	64.23	4235.2	6	0.21	0	0	1	1413	4	24	0.908705	0.0235759	3	1		1	0.69682
CR_02720C_A	34.73	10230.3	431	0.17	0.00575374	0	1	870	0	0	1	0	0	1		1	0.696708
C1_06930W_A	79.93	7626.3	8	0.2	0.00447722	0	1	3798	30	2572	0.195893	0.0511473	0	1		1	0.695939
C4_04480C_A	1880.42	2.99755e+06	87	0.69	0.00596422	0	1	1007	2	3	0.856698	0.0215116	1		-1	1	0.695403
C6_01920C_A	28.07	4712.92	66	0.16	0.000646412	0	1	1548	4	81	0.412145	0.0345482	0	1		1	0.693893
CR_02530W_A	148.82	469338	278	0.38	0.00218103	0	1	2752	5	27	0.503848	0.0804914	0	1		1	0.693543
C3_04830C_A	273.72	61910.4	2	0.41	0.00159179	0	1	5655	17	525	0.235367	0.00936685	7	1		1	0.692986
CR_01700C_A	14.61	580.541	248	0.15	0.00254823	0	1	2748	6	175	0.693231	0.0445787	0	1		1	0.692279
CR_04450C_A	40.14	1265.14	49	0.17	0.00250417	0	1	2397	4	466	0.455152	0.0387263	0	1		1	0.691444
C2_01830W_A					0.00406711	0	1	1944	3	27	0.507716	0.0375227	0		1	1	0.691379
C1_03830C_A	39.48	3259.81	283	0.16	0.00100807	0	1	993	0	0	1	0	0	1		1	0.691148
C4_00880W_A	26.95	3013.76	302	0.18	0.0119122	0	1	1596	4	274	0.611529	0.0549832	0	1		1	0.689534
C1_02480W_A	135.75	48998.8	28	0.38	0	0	1	759	1	28	0.982872	0.0343362	0	-1		1	0.689069
C5_01970C_A	21.4	4100.61	69	0.17	0.000789266	0	1	2535	7	123	0.336884	0.0201415	0	1		1	0.688926
C1_03300C_A	64.59	11473.5	9	0.16	0.00285103	0	1	1404	2	4	0.623219	0.0251263	0	1		1	0.688272
C4_06030W_A	559.38	253291	0	0.27	0.00745157	0	1	672	0	0	1	0	2		1	1	0.687863
C2_01480W_A	79.75	13627.3	9	0.2	0.00348432	0	1	2871	12	224	0.28666	0.0579486	0		-1	1	0.687662
C2_00570W_A	46.69	4562.56	8	0.18	0.00337268	0	1	1780	6	731	0.721148	0.0692616	0		-1	1	0.687529
C7_02030W_A	1117.92	1.18659e+06	1	0.63	0.000471032	1	0	2124	7	260	0.416667	0.0374315	0	1		1	0.687337
C2_08930W_A	105.28	19594.7	153	0.23	0.00720288	0	1	834	2	28	0.521583	0.0215186	1	1		1	0.686337
C4_07180W_A	4070.82	8.80242e+06	110	0.59	0.00688468	0	1	582	1	25	0.974227	0.0203307	4	1		1	0.68629
CR_03210C_A	47.94	35175.6	1	0.11	0.00147059	0	1	681	0	0	1	0	0	1		1	0.68199
C4_05330C_A	28.51	1691.96	386	0.19	0.00610169	0	1	1476	4	77	0.641599	0.0221251	0	1		1	0.681204
C5_00370W_A	694.66	280092	1	0.46	0	0	1	657	1	15	0.974178	0.0362348	2		1	1	0.67955
C4_05820W_A	80.33	17906.9	14	0.24	0	0	1	267	1	37	0.981273	0.0495194	1	1		1	0.679338
C2_06640C_A	92.49	9085.35	83	0.29	0.00327478	0	1	3360	2	11	0.752679	0.0147492	0	-1		1	0.67899
C2_06250C_A	30.08	1052.14	7	0.25	0.00228728	0	1	2187	4	25	0.394147	0.0285951	0	1		1	0.678793
C2_01120W_A	528.18	340600	0	0.49	0.00193892	0	1	2064	11	262	0.353682	0.0962126	0	1		1	0.678656
C5_05110C_A	22.95	2537.83	172	0.17	0.00509771	0	1	2355	8	245	0.551168	0.0624321	1	1		1	0.678326
C6_01100W_A	27.6	7639.38	256	0.18	0.00251256	0	1	1593	1	1	0.689266	0.012944	0	1		1	0.67773
C6_02230W_A	41.91	5369.23	182	0.23	0.00243428	0	1	2055	9	727	0.52944	0.0772674	0	1		1	0.677375
C1_00660C_A	46.75	17714.5	27	0.17	0.00197433	0	1	1014	3	4	0.504931	0.052962	0	1		1	0.677091
C2_00030W_A	47.75	7432.23	24	0.2	0.00179641	0	1	1671	1	1	0.687014	0.0235583	7	1		1	0.676666
C4_05690W_A	136.64	15852.2	11	0.25	0.00480769	0	1	2289	6	116	0.419834	0.0294444	0	-1		1	0.676114
C2_07120W_A	108.02	76624	3	0.16	0.00488998	0	1	819	3	88	0.781441	0.0528494	4	1		1	0.675562
C3_02700W_A	5.16	68.1947	99	0.22	0.00161594	0	1	3714	12	460	0.323102	0.0284969	0	1		1	0.675045
C2_08670C_A	36.61	2112.87	323	0.14	0.00314713	0	1	1272	4	207	0.712264	0.0233816	0	1		1	0.674397
C2_09900C_A	99.52	12642.3	414	0.2	0.0106707	0	1	657	1	1	0.852359	0.0221248	1	1		1	0.673191
C5_04100W_A	54.64	6220.6	2	0.18	0.00295203	0	1	1356	2	274	0.623156	0.0236815	0	1		1	0.671718
CR_04050C_A	56.5	2458.76	233	0.14	0.00107933	0	1	1854	2	46	0.687163	0.0254298	0	1		1	0.671186
C5_04670W_A	51.3	8508.2	20	0.17	0.00373367	0	1	1608	3	228	0.472637	0.0237259	0	-1		1	0.670642
CR_00460C_A	43.16	3788.1	363	0.16	0.00544465	0	1	552	0	0	1	0	0	1		1	0.670298
CR_10490W_A	379.04	90239.4	147	0.35	0	0	1	630	1	3	0.653968	0.0321526	0	-1		1	0.669592
C5_00300C_A	19.77	476.139	27	0.16	0.00121773	0	1	4107	6	62	0.416606	0.0175463	0	1		1	0.669434
C1_09460W_A	83.31	9601.29	144	0.16	0.000772201	0	1	1296	2	2	0.51929	0.0259063	1	1		1	0.669394
C2_03300W_A	95.64	18376.3	1	0.18	0.00390244	0	1	1026	0	0	1	0	1	1		1	0.6671
C3_05150W_A	94.92	53469.3	2	0.22	0.00700771	0	1	1428	6	730	0.85084	0.0207907	0		-1	1	0.666509
C2_08840W_A	51.67	4178.54	152	0.24	0.00765306	0	1	393	0	0	1	0	2	1		1	0.664799
C1_04290C_A	520.29	140074	17	0.47	0.00321854	0	1	3108	1	1	0.894633	0.00958799	1	-1		1	0.663613
C3_04670C_A	2774.2	2.85123e+08	234	0.67	0.00124533	0	1	804	4	493	0.529138	0.0249082	0		1	1	0.662356
C1_05780W_A	42.21	1556.98	5	0.19	0.00367647	0	1	1905	3	18	0.84252	0.0162332	0		-1	1	0.661779
C7_03400C_A	29.26	1166.48	291	0.25	0.00282309	0	1	3189	6	97	0.321104	0.0169011	0	1		1	0.660004
C2_01820C_A	9.05	79.2938	250	0.18	0.0032538	0	1	1845	2	67	0.758266	0.0305384	0	1		1	0.659581
C5_01780W_A	31.57	8849.7	1	0.14	0.00359928	0	1	1668	1	252	0.769784	0.00510997	0			1	0.658586
C3_00330W_A	57.72	23560.6	280	0.18	0.00191388	0	1	2091	3	255	0.714969	0.0211848	2	-1		1	0.657408
C1_03030W_A	2514.57	5.97691e+06	196	0.64	0.00397351	1	0	756	0	0	1	0	0		1	1	0.656777
C5_02070C_A	57.78	10818.3	164	0.17	0	0	1	963	4	655	0.86812	0.040827	11	1		1	0.656169
CR_04160C_A	38.7	3531.41	388	0.17	0.00146951	0	1	1362	1	1	0.860499	0.0123143	0	-1		1	0.655827
C2_10760C_A	33.68	4746.48	4	0.13	0.00387222	0	1	2067	10	164	0.41074	0.0311661	0	1		1	0.655536
C1_10380C_A	46.02	1094.02	11	0.19	0.00136488	0	1	2199	3	704	0.755343	0.0306678	0		-1	1	0.654756
C2_07670C_A	24.16	3212.29	5	0.18	0.00199734	0	1	1503	3	133	0.578842	0.0239669	0	1		1	0.65295
C3_07750W_A	101.45	10873.5	353	0.15	0.00299177	0	1	1338	2	139	0.80867	0.0173536	2		1	1	0.652794
C3_07800C_A	50.12	15928.4	191	0.2	0.00802568	0	1	624	3	457	0.876603	0.0477071	3	1		1	0.650331
C3_02370C_A	37.95	4863.55	29	0.23	0.00430262	0	1	2790	7	200	0.333692	0.0252485	0	-1		1	0.64852
C1_10100C_A	625.86	188648	43	0.37	0.00828157	0	1	484	0	0	1	0	6		-1	1	0.64735
C7_03390C_A	173.98	359552	8	0.16	0.00645161	0	1	621	0	0	1	0	0		1	1	0.646712
CR_02550C_A	36.35	5.04546e+06	397	0.15	0.00685714	0	1	876	1	1	0.518265	0.023394	0		1	1	0.646709
C1_13020C_A	64.13	60850.4	0	0.15	0	0	1	579	2	123	0.891192	0.0770617	1	1		1	0.646659
C2_01730W_A					0.00527705	0	1	759	0	0	1	0	0		-1	1	0.645733
C3_00880W_A	159.68	108048	48	0.47	0.00133779	-1	-1	2991	2	108	0.688064	0.0101843	0	1		1	0.645651
C1_12550C_A	17.62	330.049	38	0.26	0.00109569	0	1	2739	3	19	0.416575	0.0205752	0	1		1	0.645531
C1_12680W_A	92.11	18367.1	397	0.22	0.00579524	0	1	1554	1	1	0.560489	0.0100407	3	-1		1	0.644931
C4_05660C_A				0.16	0.00625838	0	1	2235	3	7	0.42774	0.0138592	2	1		1	0.643883
C1_10390C_A	3221.99	7.57843e+06	211	0.57	0.0058997	0	1	679	1	9	0.937695	0.0698272	0		1	1	0.643602
C1_10120C_A	78.75	20044	1	0.18	0.00468384	0	1	855	0	0	1	0	1	1		1	0.643314
C2_02500W_A				0.14	0.00226501	0	1	1767	12	507	0.42275	0.166738	0	1		1	0.642701
C1_12310C_A	38.53	3700.25	320	0.27	0.00113895	0	1	879	3	3	0.568828	0.0711405	0	1		1	0.64252
CR_09890C_A	34.34	2875.48	1	0.14	0	0	1	1026	5	223	0.664717	0.115738	0	1		1	0.642121
C2_03820C_A	1931.19	5.26503e+06	195	0.67	0.00473037	1	0	1058	0	0	1	0	0			1	0.641868
C1_07890C_A	97.67	21227.6	113	0.32	0.00332226	-1	-1	2409	6	219	0.199253	0.0298227	0	1		1	0.640779
C4_05760W_A	32.77	10047.8	135	0.18	0.00370645	0	1	1350	4	239	0.878519	0.0356128	2	1		1	0.640414
C4_00270W_A	2005.52	2.49088e+06	19	0.68	0	-1	-1	1925	1	1	0.950495	0.00925342	0			1	0.640037
C6_03350C_A				0.17	0.00283889	0	1	1407	0	0	1	0	2	1		1	0.639875
CR_01620C_A	430.9	233057	0	0.67	0.00173686	-1	-1	2304	1	1	0.981771	0.0108452	0	1		1	0.639693
C4_01870C_A	63.33	3699.51	8	0.14	0.0138675	0	1	1299	1	1	0.850654	0.0111159	0	1		1	0.639337
C1_09860C_A	56.74	17053.1	1	0.17	0.00253378	0	1	1185	3	5	0.859072	0.0408834	11	1		1	0.638935
C7_00960W_A	3361.84	9.4763e+06	265	0.63	0.00578035	1	0	866	0	0	1	0	0		1	1	0.63783
C5_02490C_A	64.49	5167.28	278	0.28	0.00396196	0	1	1263	1	3	0.561362	0.00784133	0			1	0.637542
C2_09020W_A	60.87	4418.31	41	0.28	0.0021322	0	1	2346	4	18	0.430946	0.0150563	1	-1		1	0.637512
C4_01270W_A	2539.4	3.79579e+06	175	0.61	0.00264317	1	0	1136	2	2	0.4782	0.043727	0		1	1	0.635841
C1_06470W_A	3499.87	3.25479e+07	114	0.66	0.00259067	-1	-1	387	0	0	1	0	0		-1	1	0.634806
C5_00260W_A	217.99	51940.2	159	0.28	0	-1	-1	1215	3	206	0.98107	0.0285486	0	1		1	0.63445
C3_03840C_A	35.98	3338.01	0	0.12	0	0	1	1470	7	258	0.811565	0.0215902	3	1		1	0.634346
C1_02420C_A	69.48	18821.1	8	0.37	0.0019322	1	0	5694	4	832	0.544608	0.0211888	0	1		1	0.633867
CR_08640C_A	76.93	11210	127	0.23	0	0	1	1764	2	79	0.689342	0.0108825	0	-1		1	0.633273
C1_03090W_A	2461.46	3.10089e+06	187	0.57	0	1	0	771	0	0	1	0	0		1	1	0.63158
C2_08760C_A	136.57	14242.7	172	0.22	0.00276583	1	0	3255	13	938	0.425192	0.028631	0		1	1	0.630001
C2_03100W_A	1673.21	1.41754e+06	28	0.73	0.00293255	1	0	2727	2	5	0.733096	0.0190733	1		1	1	0.629866
C2_09640W_A	99.75	10357.6	38	0.3	0.00301887	0	1	1326	2	13	0.520362	0.012355	0	-1		1	0.629583
C4_00240C_A	108.63	85634.6	0	0.24	0.00121359	0	1	825	4	34	0.671515	0.062777	8	1		1	0.629452
C1_07410C_A	280.96	607388	28	0.39	0.00202429	0	1	495	0	0	1	0	0	-1		1	0.627607
C1_06450C_A	2560.72	4.73126e+06	179	0.68	0.00603865	-1	-1	829	0	0	1	0	0			1	0.627425
CR_08480C_A	1768.91	3.82707e+06	65	0.66	0	1	0	171	0	0	1	0	0			1	0.627382
C1_03220C_A	1094.07	457375	0	0.45	0.00125945	1	0	795	0	0	1	0	0		-1	1	0.627239
C2_03810C_A	3141.03	5.41357e+06	141	0.67	0.00123153	1	0	812	0	0	1	0	0		1	1	0.626751
C2_01410C_A	60.06	3370.1	19	0.16	0.00067659	1	0	1479	4	253	0.93712	0.0501956	0	1		1	0.626218
C4_01050C_A	3379.75	1.10493e+07	85	0.62	0.00632911	0	0	159	0	0	1	0	0		1	1	0.626211
C7_00710W_A	2562.19	4.07942e+06	122	0.64	0.00363636	1	0	276	0	0	1	0	0		1	1	0.626211
C1_05460W_A	17.45	4135.19	44	0.15	0.00116333	0	1	4299	5	160	0.359619	0.011166	0	1		1	0.625618
C1_03110W_A	2075.1	2.99278e+06	196	0.6	0.00112108	1	0	893	0	0	1	0	1		1	1	0.625083
C4_05650W_A	52.64	5.3992e+07	272	0.17	0.00507099	0	1	987	4	295	0.451874	0.0375359	5	1		1	0.623008
C5_04720C_A	50.82	2695.98	80	0.21	0	0	1	817	0	0	1	0	0	1		1	0.622543
C1_01670C_A	6.18	66.8356	71		0.00333611	0	1	4797	7	8	0.331249	0.0345624	0	1		1	0.621669
CR_08960C_A	9.09	615.001	27	0.12	0.000482625	0	1	2073	1	35	0.931018	0.0187578	0	1		1	0.621407
C2_06240W_A	35.67	27508.8	41	0.16	0.00240964	0	1	416	0	0	1	0	0		1	1	0.620348
C3_04300C_A	19.78	912.91	34	0.19	0.000679964	0	1	4413	14	682	0.217086	0.00816723	0	1		1	0.619939
C7_00780W_A	19.53	832.138	247	0.17	0.0065388	0	1	2295	11	626	0.535948	0.0443859	0	1		1	0.619447
C5_02660C_A	102.53	15358.2	365	0.24	0.00297915	0	0	1008	4	156	0.858135	0.0322162	0	1		1	0.619369
C7_02770W_A	35.66	1520.99	5	0.17	0.0038961	0	1	3081	10	804	0.312885	0.0311279	2	1		1	0.618368
C2_10740C_A	45.73	9197.67	79	0.17	0.00436364	0	1	2751	4	6	0.310433	0.00844161	21	1		1	0.618248
C1_04610W_A	1302.69	2.00148e+06	24	0.69	0.00280112	-1	-1	2143	2	2	0.589275	0.0187806	0		-1	1	0.617338
CR_06450W_A	8.03	76.2163	309	0.13	0.00145631	0	1	2061	4	22	0.941776	0.0368922	0	1		1	0.616961
C3_00090W_A	3061.82	9.41143e+06	84	0.62	0	1	0	408	0	0	1	0	0		1	1	0.615843
C3_02110W_A	3402.53	8.35461e+06	229	0.6	0.00402414	1	0	498	0	0	1	0	0		1	1	0.615497
C1_14390W_A	498.69	2.41687e+06	7	0.17	0.00452489	0	1	222	0	0	1	0	1	1		1	0.61492
C1_01470W_A	84.67	4653.5	6	0.23	0.000772201	0	1	1296	1	1	0.66821	0.0247581	0	-1		1	0.614579
C1_09640W_A	291.47	163098	0	0.41	0.00311042	-1	-1	1287	3	4	0.727273	0.0365668	0	1		1	0.614481
C2_10790C_A	42.69	30366.9	0	0.09	0.00758725	0	1	660	5	132	0.566667	0.0467934	9	1		1	0.613627
C5_01510W_A	58.19	63775.3	3	0.09	0	0	1	321	2	220	0.956386	0.0595387	6	1		1	0.61297
C3_06100C_A	104.84	30690.2	10	0.39	0.0024777	0	1	2019	2	39	0.88311	0.00838754	1	-1		1	0.61273
C1_08320W_A	488.07	380834	3	0.58	0.00196754	-1	-1	2034	3	272	0.353982	0.0234946	0			1	0.61269
C5_01240W_A	34.44	18974	22	0.15	0.00918728	0	1	1416	12	661	0.537429	0.0852056	0	1		1	0.612367
C3_03260W_A	38.37	3351.17	15	0.15	0.000715564	0	1	2796	5	165	0.66166	0.00920139	10	1		1	0.612345
C2_03200W_A	14.07	1911.67	64	0.16	0.000746269	0	1	1341	3	13	0.609993	0.0672097	0	1		1	0.612304
C2_04570W_A	71.45	17300.6	381	0.27	0.00859375	0	1	1284	5	459	0.679907	0.128179	0	1		1	0.610963
C2_01490C_A	31.43	5538.99	1	0.14	0.00423131	0	1	1419	2	2	0.50599	0.0186813	0	1		1	0.609896
C3_00830C_A	26.09	873.44	20	0.17	0.00346021	0	1	2313	7	196	0.722871	0.037761	0	1		1	0.609597
C3_02470C_A	1626.78	1.66816e+06	190	0.65	0.00173913	-1	-1	576	0	0	1	0	0		1	1	0.608091
C2_04640C_A	10.1	148.646	322	0.17	0.00814863	0	1	3069	2	17	0.712284	0.0175682	0	1		1	0.607972
C1_11060C_A	3777.98	8.45593e+06	126	0.68	0.00513699	-1	-1	1169	1	4	0.973856	0.027047	0		1	1	0.606806
C3_06650C_A	32.99	1405.92	15	0.16	0.00384862	0	1	1560	2	70	0.834615	0.0116756	0	1		1	0.606773
C1_02860C_A	65.79	34038.9	193	0.21	0.00166113	0	1	603	1	45	0.998342	0.0303709	1	-1		1	0.606285
C2_03870W_A	57.67	3574.17	36	0.24	0	0	1	450	1	12	0.911111	0.0389361	0	1		1	0.605306
C6_01980C_A	107.04	10854.5	325	0.21	0.0139104	0	1	648	1	1	0.614198	0.024271	0	-1		1	0.605187
C2_01610C_A	4319.98	9.67018e+06	84	0.74	0.00278552	1	0	360	0	0	1	0	0		1	1	0.604673
C1_10950C_A	32.82	24390.5	263	0.17	0.00540176	0	1	1482	3	82	0.495951	0.0337109	2		-1	1	0.604555
C1_13300C_A				0.25	0.00569705	-1	-1	2982	3	67	0.563045	0.0282489	0	1		1	0.604502
C7_01920W_A	121.42	48363.4	56	0.21	0.0013624	0	1	735	3	172	0.491156	0.0318576	1	-1		1	0.603526
C2_08000C_A	249.76	938800	407	0.38	0.000546747	0	1	1830	4	177	0.327869	0.0203973	1	-1		1	0.603375
C6_04270W_A	37.98	1433.62	19	0.19	0.00512397	0	1	6051	30	1322	0.367377	0.0342459	0	1		1	0.602411
C6_03120W_A	16.71	817.884	145	0.21	0.00315756	0	1	3168	3	43	0.510732	0.0100007	0	1		1	0.602199
CR_09110C_A	47.5	11018.4	124	0.22	0.00116686	0	1	858	0	0	1	0	0	-1		1	0.601813
C3_01200W_A				0.18	0.0035976	0	1	7503	11	38	0.602692	0.0210146	1			1	0.601524
C1_06540C_A	30.57	1539.02	191	0.14	0.00178412	0	1	1125	4	74	0.608889	0.024477	0	1		1	0.601455
C2_05410W_A	2802.31	6.95047e+06	244	0.62	0.0134146	-1	-1	821	0	0	1	0	0		-1	1	0.601425
C5_00480C_A	119.5	24001	11	0.29	0	0	1	906	1	1	0.818985	0.0138144	2	-1		1	0.600609
C1_06890C_A	2445.39	7.08174e+06	192	0.72	0.00123457	-1	-1	811	0	0	1	0	1			1	0.600472
C4_06930C_A	28.57	6454.81	3	0.13	0	0	1	723	1	95	0.950207	0.0149263	3	1		1	0.600155
C1_10870W_A	2433.84	3.69282e+06	152	0.73	0.00252525	1	0	793	0	0	1	0	1		1	1	0.600083
C3_02450W_A	111.56	17641	3	0.2	0	0	1	446	1	42	0.94086	0.0339442	2		-1	1	0.599574
CR_04520W_A	78.53	10916.9	0	0.15	0.00257069	0	1	390	1	146	0.817949	0.0473158	1	1		1	0.599237
C3_07810C_A	269.77	116966	12	0.37	0.00486449	0	1	1440	5	992	0.652778	0.0346479	0	-1		1	0.599223
C2_08500W_A	52.76	13381.2	48	0.19	0.000800641	0	1	2499	4	23	0.42537	0.013877	0	-1		1	0.598947
C2_02450C_A	41.3	1922.67	290	0.19	0.00198469	0	1	3528	6	104	0.363662	0.0395509	0	-1		1	0.597305
C1_03780C_A	57.05	2507.75	51	0.2	0.00310463	1	0	3222	2	23	0.598386	0.0112216	0	1		1	0.597148
C1_01570C_A	71.09	18572.4	55	0.15	0.00575816	0	1	522	4	343	0.666667	0.123157	0	1		1	0.59685
CR_04100C_A	2805.85	5.48437e+06	160	0.69	0	-1	-1	615	0	0	1	0	0		1	1	0.596841
C1_06460C_A	2606.65	6.28987e+06	113	0.66	0	-1	-1	393	1	1	0.597964	0.0216887	0		-1	1	0.596667
CR_07520C_A	113.45	29624.8	43		0.00149701	1	0	669	2	124	0.971599	0.0340416	0	1		1	0.596291
C5_05350W_A	34.07	2595.01	8	0.15	0.00392465	0	1	1275	0	0	1	0	0	1		1	0.595941
C2_05210W_A	18.42	667034	0	0.17	0.0159151	0	1	378	1	8	0.941799	0.0435408	1	1		1	0.595827
C1_10040W_A	75.66	15030.1	1	0.25	0.00344432	0	1	1743	6	385	0.311532	0.0678633	1	-1		1	0.595779
C7_03700C_A	34.67	2526.81	421	0.21	0.00700771	0	1	1428	2	217	0.990896	0.0135792	0	-1		1	0.595512
C2_08560W_A	11.01	423.789	202	0.18	0.00341394	0	1	3516	3	20	0.800057	0.00979954	0	1		1	0.594577
CR_01110W_A	107.25	16496.3	11	0.2	0.00239521	0	1	1671	2	267	0.552364	0.0191924	1	-1		1	0.592811
C1_03010W_A	1957.09	2.73889e+06	108	0.58	0.003125	-1	-1	321	0	0	1	0	0		-1	1	0.592381
C2_07460W_A	46.88	13295.3	12	0.13	0.00183318	0	1	1092	2	2	0.377289	0.0194557	0	1		1	0.592245
C3_03750C_A	19.91	919.656	108	0.15	0.000488281	0	1	2049	3	21	0.499268	0.00695974	3	1		1	0.592006
CR_09740W_A	28.57	2073.56	352	0.21	0.00311721	0	1	1605	4	24	0.485358	0.0506853	1			1	0.591345
C5_00690C_A	11.81	467.026	46	0.18	0	0	1	1143	1	192	0.970452	0.0150176	1	1		1	0.591192
C5_00040C_A	90.85	19798.1	25	0.09	0.00182593	0	1	1644	1	1	0.881995	0.00884497	2	1		1	0.591014
C7_03850W_A	19.3	2396.93	156	0.16	0.00670541	0	1	2238	12	167	0.442359	0.0514465	0	1		1	0.589101
C2_04600C_A	1789.16	1.83382e+06	168	0.48	0	-1	-1	558	0	0	1	0	0		1	1	0.58775
C2_03960W_A	2524.77	4.08007e+06	167	0.56	0.00276243	1	0	725	0	0	1	0	0		1	1	0.587687
C4_01680W_A	39.17	10660.1	28	0.17	0.00510204	0	1	393	2	223	0.715013	0.110007	0	1		1	0.587637
C2_07470W_A	23.19	1652.2	7	0.17	0.00511654	0	1	3519	6	100	0.374822	0.0190926	0	1		1	0.587564
C2_07680W_A	75.88	15057.5	330	0.22	0.0023175	-1	-1	864	2	2	0.501157	0.03279	13	1		1	0.58742
C4_01520C_A	1946.47	1.86812e+07	196	0.56	0.0019305	1	0	519	0	0	1	0	0		1	1	0.586406
C1_09490C_A	269.55	62726.4	332	0.45	0	-1	-1	1593	4	30	0.410546	0.0524682	0	1		1	0.586251
C2_10680W_A	33.12	5.26045e+08	0	0.13	0.00165153	0	1	1212	35	2536	0.520627	0.206729	13	1		1	0.585106
C1_07690C_A	16.57	346.009	86	0.18	0.00382531	0	1	3138	1	1	0.914914	0.0052013	0	1		1	0.583658
C5_03160W_A	9.69	134.88	176	0.18	0.00211361	0	1	3786	12	129	0.348653	0.038268	0	1		1	0.583323
C5_01940W_A	33.47	1610.06	13	0.16	0.00226116	0	1	1770	4	192	0.492655	0.0149599	32	1		1	0.583272
C1_13760W_A	30.91	3143.92	23	0.23	0.000611995	0	1	1635	4	82	0.41896	0.0510364	0	-1		1	0.582271
CR_08090W_A	1919.57	1.92664e+06	87	0.73	0.00108637	-1	-1	1842	8	410	0.335505	0.0304887	0		1	1	0.58119
CR_04020C_A	37.21	7646.37	10	0.17	0.00574713	0	1	697	0	0	1	0	0	1		1	0.580964
C1_04180W_A	782.72	884195	23	0.56	0	0	0	393	0	0	1	0	0		-1	1	0.580484
C3_04370C_A	19.95	370.866	175	0.16	0	0	1	3363	31	1851	0.297354	0.0228339	2	1		1	0.580107
C3_04950W_A	769.51	237132	13	0.43	0	1	0	546	0	0	1	0	1	1		1	0.579356
C1_02880C_A	135.08	69952.3	15	0.27	0.00395778	0	1	759	4	434	0.860343	0.0925568	0	1		1	0.578488
CR_10540C_A	15.63	601.629	33	0.17	0.00118064	0	1	1695	2	2	0.679646	0.0257581	0	1		1	0.577493
CR_10610C_A	27.15	14289.5	1	0.12	0	0	1	402	5	775	0.885572	0.260188	0	1		1	0.576765
CR_05630W_A	34.83	2430.54	311	0.17	0	0	1	1323	1	1	0.679516	0.0154567	4	1		1	0.576229
C2_03280W_A	121.28	11662.3	3	0.15	0.00602968	0	1	2157	2	90	0.462216	0.0144438	1	1		1	0.576045
CR_02090C_A	57.72	6991.68	3	0.15	0.000640205	0	1	1563	0	0	1	0	2	-1		1	0.575309
C4_06790W_A	72	26973.6	1	0.14	0.00852619	0	1	822	1	24	0.847932	0.0153864	4	1		1	0.574967
C3_05200W_A	1890.5	5.11863e+06	148	0.76	0.00497512	1	0	805	1	215	0.984018	0.0125654	0		1	1	0.574944
C6_03210C_A	14.31	1554.74	330	0.19	0	0	1	993	3	23	0.60423	0.0372856	1	1		1	0.574871
C1_12390C_A	2302.05	5.00789e+06	170	0.49	0.00726392	-1	-1	827	1	1	0.557178	0.0512117	0		1	1	0.574869
C1_03020C_A	2820.52	4.68874e+06	141	0.7	0	-1	-1	609	0	0	1	0	0		1	1	0.573508
C7_00050C_A	52.13	4757.81	1	0.09	0.00217675	0	1	2298	22	1923	0.496519	0.124069	1	1		1	0.573458
C3_02320W_A	132.94	23774.5	10	0.26	0.00195027	-1	-1	2052	3	291	0.968324	0.0139114	0		1	1	0.572398
CR_05560W_A	20.45	553.64	7	0.16	0.00202156	0	1	1485	4	16	0.420875	0.0524682	0	1		1	0.572117
CR_03360W_A	52.86	13798.9	278	0.14	0.00403769	0	1	744	0	0	1	0	6	1		1	0.57136
C2_09680W_A	25.58	9574.47	15	0.1	0.00442478	0	1	453	2	68	0.933775	0.0357984	0	1		1	0.571253
C3_07780C_A	57.21	10196.3	4	0.16	0.0113636	0	1	2553	19	2311	0.809636	0.0958574	1	1		1	0.570874
C6_02570C_A	20.95	366.387	7	0.2	0.001002	0	1	999	5	1011	0.785786	0.0590717	12	1		1	0.570719
C4_04920W_A	40.59	6472.82	76	0.15	0.0107335	0	1	1119	1	7	0.946381	0.00818128	0		-1	1	0.570262
C2_06650C_A					0.00585137	0	1	1710	5	342	0.805263	0.0713213	0		-1	1	0.569755
CR_05700C_A	41.09	8675.49	23	0.17	0.0022173	0	1	903	0	0	1	0	0	1		1	0.569563
C1_08110W_A	73.49	4312.67	131	0.21	0.000610687	0	1	3276	14	2837	0.568071	0.0332619	0	-1		1	0.568919
CR_10060W_A	45.92	17948	7	0.17	0.000706714	0	1	1416	5	155	0.512712	0.0822348	11	1		1	0.568455
C5_04270C_A	636.17	184345	8	0.68	0.00591716	0	1	1353	2	14	0.451589	0.0213327	0	-1		1	0.568349
C4_01700C_A	1568.83	2.17027e+06	8	0.55	0.00359712	1	0	279	0	0	1	0	0		1	1	0.568242
C5_01540W_A	1761.42	3.37764e+06	149	0.68	0.00117647	1	0	851	1	1	0.705128	0.0203306	1		1	1	0.568131
C1_06100C_A	325.51	89686.6	15	0.41	0.000475059	1	0	2106	10	765	0.632953	0.0503872	0		1	1	0.568131
C3_07110W_A	4.97	42.3025	131	0.15	0.00421385	0	1	3798	6	51	0.368352	0.0177363	0		1	1	0.567774
C3_02690C_A	20.96	1838.85	164	0.17	0	0	1	1761	1	1	0.894946	0.00513138	1		-1	1	0.567424
CR_01350C_A	95.7	56784	25	0.18	0.00227015	0	1	882	2	3	0.517007	0.0581808	0	1		1	0.567141
C5_00200C_A	85.26	10666.1	0	0.2	0.00375763	-1	-1	2130	4	6	0.324413	0.0297777	0	1		1	0.56652
C7_00950W_A	60.98	11721	248	0.19	0.00478469	0	1	837	2	3	0.688172	0.0304821	0	-1		1	0.56624
C4_02430W_A	13.61	227.144	102	0.18	0.00398874	0	1	4263	5	16	0.747596	0.0188796	1	1		1	0.566207
C5_03830C_A				0.19	0.00286533	0	1	696	8	492	0.882184	0.15779	9	1		1	0.565976
C2_05610C_A	2862.25	2.58807e+07	131	0.72	0.0016129	1	0	621	0	0	1	0	0		1	1	0.565379
C2_06810C_A	1942.9	1.12595e+07	69	0.64	0.00218103	-1	-1	918	0	0	1	0	0		1	1	0.565313
C1_13050W_A	2057.48	1.58239e+07	228	0.54	0	-1	-1	750	0	0	1	0	1		1	1	0.565131
CR_06740W_A	6.05	56.5819	52	0.14	0.00267686	0	1	2616	5	31	0.539755	0.0177193	1	1		1	0.564627
C7_02980C_A	10.14	7004.83	3	0.14	0.0035693	0	1	3363	17	1089	0.670235	0.0398431	0	1		1	0.564014
C6_00750C_A	1896.71	1.44657e+07	27	0.64	0.00159617	0	1	1254	1	1	0.712121	0.0106926	1	-1		1	0.563768
C3_03330C_A	15.55	1225.46	0	0.15	0.00380048	0	1	2106	18	1416	0.500475	0.056873	0	1		1	0.563636
C2_06360C_A	54.65	18520.4	236	0.25	0.00527983	0	1	948	4	235	0.694093	0.0884904	0			1	0.563361
CR_08630W_A	17.92	5720.39	0	0.13	0.00114416	0	1	1749	8	265	0.358491	0.0439032	2	1		1	0.563023
CR_01120C_A	74.56	51876.4	4	0.14	0.0027248	0	1	735	0	0	1	0	0	-1		1	0.561438
C1_14440C_A	205.69	400601	1	0.29	0.00222387	0	1	1350	10	1188	0.44	0.132708	0	1		1	0.560476
C1_11360W_A	3328.48	8.33451e+06	122	0.65	0.00801282	1	0	626	0	0	1	0	1		1	1	0.560211
CR_03830C_A	20.99	490.574	11	0.26	0.00442641	0	1	2712	2	30	0.793879	0.017822	0		1	1	0.559905
C1_13710C_A	13.82	538.98	1	0.14	0	0	1	300	2	76	0.526667	0.129477	0	1		1	0.559122
C1_01350C_A	967.68	516699	47	0.63	0.00251467	1	0	1194	0	0	1	0	1		1	1	0.558911
CR_10390W_A	18.69	1048.91	2	0.12	0	0	1	747	6	1096	0.480589	0.15521	0	1		1	0.557936
C2_07940C_A	31.16	1036.14	16	0.11	0.000673854	0	1	1485	0	0	1	0	2	1		1	0.557766
C6_02070C_A	2775.22	8.92176e+06	179	0.5	0.0140086	-1	-1	929	1	1	1.36232	0.0362662	0			1	0.557758
C4_06490C_A	5.63	80.6762	74	0.17	0.00919681	0	1	1632	3	3	0.530637	0.0244904	0	1		1	0.557711
CR_07630C_A	2452.89	4.74383e+06	160	0.55	0.0058997	1	0	677	0	0	1	0	0		1	1	0.557687
C3_06700C_A	97.38	17053.9	0	0.23	0.00597501	-1	-1	1842	3	166	0.567318	0.0183794	0	1		1	0.557676
C1_01850C_A	37.61	37524.2	4	0.12	0.00361446	0	1	831	3	166	0.954272	0.0560466	5	1		1	0.557499
C1_09010W_A				0.16	0.00710771	0	1	1824	4	73	0.775219	0.0303086	1	-1		1	0.555703
CR_01230C_A	6.9	52.908	203	0.15	0.00228397	0	1	2628	3	24	0.412481	0.0318324	0		-1	1	0.555686
CR_01680C_A	59.3	8654.22	18	0.15	0.00216826	0	1	2307	3	163	0.557434	0.028367	0	-1		1	0.554354
C1_08980C_A	110.55	64059.7	155	0.27	0.0019698	-1	-1	1524	6	134	0.527559	0.0570637	0	1		1	0.552827
C5_02530W_A	39.87	2576.38	87	0.25	0.000684932	0	1	1461	2	5	0.78371	0.0112512	0	-1		1	0.551542
C1_14230C_A	15.01	760.754	16	0.18	0.00397675	0	1	3270	10	1042	0.493272	0.0624435	0	1		1	0.550569
C2_05690C_A	68.1	33235.3	18	0.16	0	0	1	648	5	1148	0.763889	0.124754	0	1		1	0.550524
CR_01990C_A	8.11	166.406	72	0.13	0.00381841	0	1	2358	1	1	0.545377	0.0129111	1	1		1	0.550482
C5_02300C_A	88.13	7412.43	32	0.24	0.00116212	0	1	1722	17	1348	0.239837	0.0844089	1	1		1	0.550473
C1_07140C_A	40.28	3226.03	1	0.19	0.00255265	0	1	3135	4	6	0.376077	0.0113439	2	-1		1	0.550112
C3_03900C_A	574.82	499844	12	0.42	0	0	1	393	3	27	0.951654	0.0382695	0	-1		1	0.549353
C1_02750C_A	50.4	1445.86	6	0.17	0.00209468	-1	-1	2388	4	16	0.555695	0.0349421	0	1		1	0.549143
C1_11090C_A	29.09	1928.74	5	0.15	0.00367872	0	1	1632	7	490	0.876838	0.0900154	3	1		1	0.548431
C1_09170W_A				0.17	0.00218818	0	1	2283	13	1633	0.310994	0.100975	0	1		1	0.548137
C6_02520W_A	85.15	47469.9	1	0.15	0.00494438	-1	-1	810	3	3	0.465432	0.0461411	0	1		1	0.54725
C2_06000W_A	21.18	4750.55	169	0.15	0.00338295	0	1	1479	2	78	0.85666	0.0189403	6	1		1	0.546912
CR_01360W_A	13.67	1919.69	6	0.13	0.00169491	0	1	591	1	1	0.876481	0.0434141	0	1		1	0.546816
CR_02700W_A	32.3	3673.5	101	0.32	0.00261097	0	1	384	0	0	1	0	0		-1	1	0.545471
C6_02780C_A	22.37	5812.82	0	0.16	0.00256082	0	1	1563	1	1	0.587332	0.00734737	1	1		1	0.545463
C2_06390C_A	467.72	975999	234	0.42	0.00551876	-1	-1	1813	0	0	1	0	1			1	0.545281
C2_05190W_A	39	11332.1	3	0.18	0.0031679	0	1	948	3	14	0.436709	0.0476994	2		-1	1	0.544809
C2_04200W_A	22.28	2167.43	98	0.16	0.00676692	0	1	2661	5	190	0.570838	0.0300435	1	1		1	0.544561
C2_05680W_A	16.54	291.295	7	0.16	0.00224803	0	1	2670	5	259	0.901498	0.0288098	2		-1	1	0.544256
C3_04470W_A	45.87	2083.01	1	0.19	0.000607349	0	1	3294	74	4037	0.109897	0.0426989	21	1		1	0.543751
C2_09910C_A	43.05	9700.1	1	0.17	0.00549451	0	0	183	0	0	1	0	0			1	0.542831
C1_08660C_A	25.58	12186.2	0	0.18	0.0012987	0	1	771	1	1	0.994812	0.0142902	1	1		1	0.542339
C5_03920C_A	37.34	5340.01	181	0.2	0.00826446	0	1	606	0	0	1	0	0			1	0.542131
C6_02910W_A	19.76	1818.65	305	0.15	0.00238379	0	1	840	1	1	0.927381	0.0115908	1	1		1	0.540987
CR_02990C_A	44.58	12775.1	0	0.2	0.00486381	-1	-1	1029	3	5	0.842566	0.0613687	0	1		1	0.540801
C4_03270W_A	82.12	29577.9	254	0.19	0.00224719	0	1	891	0	0	1	0	5		-1	1	0.54055
C5_04080C_A	29.4	7153.57	0	0.12	0.00150376	0	1	666	1	326	0.908408	0.0203479	2		-1	1	0.540107
C1_11420W_A	43.67	7610.67	365	0.27	0.00185874	0	1	1077	13	353	0.343547	0.222027	0	1		1	0.540083
C4_02460W_A	16.14	1084.17	19	0.17	0	0	1	639	1	1	0.780908	0.0234838	0	1		1	0.536941
C3_03170W_A	167.03	32651.8	8	0.16	0	0	1	897	2	35	0.502787	0.0108258	0	-1		1	0.536884
C4_02060C_A	74.12	8243.04	0	0.17	0.00219058	0	1	1827	13	1513	0.277504	0.105063	0	1		1	0.536352
CR_10820W_A	125.12	118625	18	0.1	0	0	1	351	2	134	0.680912	0.0872233	3	1		1	0.534241
C2_02300W_A				0.1	0.00273598	0	1	729	4	45	0.788752	0.109877	0	1		1	0.533497
C5_02150C_A	26.54	1235.73	3	0.15	0.00413223	0	1	1695	3	115	0.454867	0.0155276	0	1		1	0.533242
C4_00740W_A	21.78	13182.4	60	0.16	0	0	1	504	2	234	0.543651	0.0845728	9	1		1	0.53205
CR_04260W_A	79.57	43077.5	8	0.16	0.00271003	0	1	370	0	0	1	0	0	-1		1	0.532021
C2_02150C_A	20.33	728.482	39	0.19	0.00547368	0	1	2376	0	0	1	0	0	1		1	0.531586
C1_00940W_A	91.03	87450.5	64	0.16	0.00218341	0	1	459	0	0	1	0	1		1	1	0.530848
C1_03530W_A	26.26	375.162	8	0.15	0.00170068	0	1	1765	3	74	0.762073	0.0285526	7	1		1	0.530551
C7_01400C_A	6.11	99.5749	141	0.16	0.00345125	0	1	2319	12	541	0.490729	0.0564073	0			1	0.530169
CR_10850C_A	1358.02	2.80534e+06	13	0.46	0	0	1	486	1	188	0.897119	0.0313786	2	-1		1	0.528742
C2_01030W_A	129	60434.7	240	0.24	0.00312013	-1	-1	642	0	0	1	0	2	1		1	0.528469
C2_10200W_A	38.21	14298.4	12	0.16	0.00776699	0	1	516	0	0	1	0	0	-1		1	0.526725
C5_00770C_A	19.05	338.24	10	0.17	0.00253593	0	1	2367	2	77	0.664554	0.0106214	0		1	1	0.525152
C5_00590W_A	2594.95	2.6217e+07	142	0.72	0.00110497	0	1	906	3	208	0.516556	0.0437392	0	-1		1	0.524868
C1_00770C_A	21.83	10196.3	0	0.16	0	0	1	783	3	8	0.407407	0.102098	0	1		1	0.524078
C1_01580W_A	127.04	33332.3	221	0.26	0	-1	-1	531	1	74	0.962335	0.0324418	2	1		1	0.523026
C4_00510C_A	105.43	80483.5	358	0.3	0.00158983	0	1	630	1	14	0.528571	0.0286547	0	-1		1	0.522769
C2_07450C_A	69.33	9121.69	292	0.16	0.00269058	0	1	1116	3	589	0.982079	0.0300685	0	-1		1	0.522651
C1_00640C_A	39.08	2667.89	209	0.2	0.00281907	-1	-1	3903	2	7	0.641045	0.00878901	0	1		1	0.522176
C3_06870W_A	10057.9	2.43537e+08	21	0.73	0.0039722	1	0	1008	1	10	0.789683	0.0127019	0		1	1	0.521375
C3_00420W_A	27.74	4564.5	83	0.15	0.000777303	0	1	2574	4	159	0.496892	0.0200044	0	-1		1	0.520512
C2_08310W_A	49.54	12902.9	8	0.12	0	0	1	555	1	1	0.625225	0.0280144	0	1		1	0.520455
C2_00220C_A	49.48	27291.3	2	0.15	0.00174672	0	1	1146	2	2	0.400524	0.0316629	2		-1	1	0.520374
C6_01760W_A	47.57	1561.44	6	0.21	0.00118812	-1	-1	2526	6	420	0.275139	0.033536	0	1		1	0.520267
CR_10410C_A	74.17	10000.9	359	0.22	0	-1	-1	831	1	1	0.605295	0.0227164	0	1		1	0.51953
C3_07950C_A	901.39	534048	3	0.5	0.00827206	0	1	1089	3	26	0.417815	0.0698695	7	1		1	0.519218
CR_07710W_A	164.03	18612.7	45	0.24	0.00322321	-1	-1	1242	4	87	0.5781	0.0267035	30	1		1	0.518698
C5_03540C_A	4132.68	8.0679e+06	131	0.66	0.00946372	-1	-1	318	1	2	0.534591	0.0412876	0		-1	1	0.517917
C1_14110C_A	1868.48	2.20902e+06	90	0.72	0.00549954	1	0	1092	1	26	0.679487	0.0227217	0		1	1	0.515905
C1_07240W_A	82.76	13413.8	0	0.15	0	0	1	555	1	1	0.996396	0.0156432	0	-1		1	0.515325
CR_07510W_A	42.79	15365.1	1	0.15	0	0	1	451	1	15	0.994709	0.0290558	1		1	1	0.515122
C1_02240W_A	37.3	1589.69	13	0.22	0.000761325	0	1	2628	1	1	0.634323	0.00812277	0	-1		1	0.515039
C3_01490W_A	1387.15	1.40006e+06	199	0.55	0	1	0	561	1	1	0.500891	0.0197925	2			1	0.514912
C6_02610C_A	61.5	1.72656e+07	53	0.27	0.00393185	0	1	1527	8	1004	0.616896	0.0496664	0	-1	-1	1	0.514855
CR_09970W_A	599.4	299590	0	0.28	0.00225479	1	0	888	0	0	1	0	0		-1	1	0.514663
CR_02630C_A	4.38	138.774	18	0.16	0	0	1	846	1	155	0.696217	0.0375948	0		-1	1	0.513075
C2_03920C_A				0.13	0.00131277	0	1	3045	2	2	0.461741	0.0131291	0	-1		1	0.512997
C4_01740W_A	25.44	2632.5	59	0.17	0.00303951	0	1	330	3	229	0.578788	0.153616	0	1		1	0.512271
CR_03750C_A	13.18	3070.16	131	0.16	0.00254022	0	1	1182	0	0	1	0	0	1		1	0.511576
C5_01600C_A	13.86	407.368	191	0.14	0.00580475	0	1	1896	5	58	0.529536	0.0203893	0	1		1	0.511047
C1_09670C_A	73.15	4529.59	0	0.21	0.00301205	0	0	333	0	0	1	0	0		1	1	0.511019
CR_04540C_A	29.05	2927.78	1	0.14	0.00235294	0	1	426	0	0	1	0	8	1		1	0.510869
C2_02270C_A	80.11	24114.9	184	0.19	0.00642398	-1	-1	468	1	2	0.863248	0.0495604	2	1		1	0.51039
C1_11500C_A	32.59	22550.8	162	0.25	0.00248139	-1	-1	807	2	2	0.757125	0.0626589	0	1		1	0.510139
C1_12220W_A	8.13	149.852	2		0.00276817	0	1	1446	1	34	0.955048	0.010533	0	1		1	0.509515
C1_04170C_A	953.23	1.01416e+06	12	0.48	0	-1	-1	396	0	0	1	0	0		-1	1	0.508631
C7_03250C_A				0.46	0.00118906	0	1	1680	2	25	0.654167	0.0120015	0	-1		1	0.508357
CR_03930C_A	21.06	343.976	26	0.13	0.00230592	0	1	1302	6	348	0.607527	0.0862528	0	1		1	0.50821
C2_06120C_A	8.69	126.616	26	0.15	0.00191205	0	1	1047	2	56	0.99618	0.0198131	16	1		1	0.507117
C5_04590C_A	3518.85	8.67887e+06	141	0.53	0.00924499	1	0	652	0	0	1	0	1		1	1	0.50612
C2_05530C_A	62.58	3638.69	9	0.15	0.00518582	0	1	1158	1	52	0.887737	0.0151794	1		-1	1	0.505685
C3_02350W_A	34.06	3125.3	330	0.21	0.0095	0	1	2004	10	829	0.889222	0.0490189	0	-1		1	0.505105
C6_00640C_A	22.94	2893.13	0	0.15	0.00183318	0	1	1092	0	0	1	0	2	1		1	0.504643
C3_00110C_A	55.03	5287.3	5	0.1	0.00203335	0	1	2460	17	1180	0.411382	0.18677	3	1		1	0.504541
C4_05170C_A				0.14	0.00163934	0	1	1216	17	1211	0.493421	0.11561	8	1		1	0.503872
C1_12670C_A				0.18	0.00329068	0	1	2736	1	1	0.817617	0.00525045	4	-1		1	0.50378
C2_00070C_A	94.99	38279.7	142		0.00293599	0	1	1704	10	915	0.955399	0.227865	8	1		1	0.503572
C4_07220C_A	15.94	7032.24	1	0.14	0.0089172	0	1	3141	4	156	0.399873	0.0395922	0			1	0.503552
C3_02180C_A	82.01	5373.68	189	0.22	0.00175593	0	1	1140	8	529	0.87193	0.0553117	15	-1		1	0.502921
C6_00530C_A	54.07	42575.8	1	0.15	0.00384615	0	1	261	2	3	0.455939	0.124562	5	1		1	0.502817
CR_07210W_A	105.82	13240.9	2	0.18	0.00210084	0	1	477	2	138	0.962264	0.0433908	1	-1		1	0.501204
C5_01870W_A				0.22	0.00212947	-1	-1	2349	11	176	0.300128	0.0296849	0			1	0.500975
C2_04500W_A	28.62	3282.19	16	0.19	0.00295807	0	1	5748	6	55	0.246695	0.0234084	0		-1	1	0.500878
C3_01030W_A	28.3	1299.12	241	0.2	0	0	1	1455	5	157	0.43299	0.0487487	1	-1		1	0.50025
C1_02160W_A	21.59	2384.31	2	0.16	0	0	1	507	0	0	1	0	2	1		1	0.500066
C1_07910C_A	44.85	8580.14	294	0.18	0.00247117	-1	-1	1215	0	0	1	0	0	1		-1	0.499965
C6_02120W_A	79.45	5649.97	13		0.00180759	-1	-1	4980	13	190	0.277912	0.0339199	0	1		-1	0.499471
C2_07260C_A	159.71	80563.8	3	0.19	0.00227273	0	0	441	0	0	1	0	0	1		-1	0.49939
C4_03740W_A	32.67	2209.39	308	0.14	0.00328228	0	1	915	2	18	0.512568	0.0177889	0	-1		-1	0.498594
C4_01710C_A	304.79	105910	9	0.17	0.00233645	0	0	429	1	1	0.585082	0.0432092	0		-1	-1	0.498132
C1_03600W_A	74.3	4824.06	18	0.19	0.00120919	0	1	828	0	0	1	0	0	-1		-1	0.497297
C6_02590C_A	50.58	12932.1	0	0.16	0.00243605	0	1	822	1	19	0.990268	0.012784	1	-1		-1	0.494852
CR_00250W_A	1584.78	4.09996e+06	18	0.42	0.0027027	-1	-1	371	0	0	1	0	1			-1	0.494465
C3_02840W_A	11.55	610.954	78	0.12	0.00174825	0	1	573	4	95	0.455497	0.0521637	3	1		-1	0.494334
C1_01680C_A	69.86	13360.6	330	0.24	0.00390625	-1	-1	513	1	1	0.732943	0.0522525	3		-1	-1	0.494073
C5_01930W_A	16.71	2230.64	30	0.17	0	0	1	1542	4	322	0.624514	0.015851	21	1		-1	0.493318
C2_10620W_A	3007.53	5.62943e+06	126	0.69	0.00380711	0	0	789	5	724	0.908745	0.0470021	6		-1	-1	0.493257
C4_02640C_A	15.63	5065.41	50	0.2	0.00513259	0	1	1170	4	18	0.600855	0.0522577	0	1		-1	0.49258
C2_07060W_A	42.41	5179.47	17	0.12	0.00256739	0	1	780	3	296	0.926923	0.0539706	1		-1	-1	0.491322
C4_07100C_A	18.32	327.491	17	0.17	0.00218011	0	1	5964	18	406	0.438799	0.0278847	4	1		-1	0.49015
C7_00530C_A	22.48	2875.41	1	0.16	0	0	1	534	4	262	0.928839	0.080973	10		-1	-1	0.489967
CR_07420W_A	204.6	97294	71	0.45	0.00150943	-1	-1	1326	3	6	0.374057	0.0226035	0		-1	-1	0.489905
CR_03740C_A	63.69	37273.2	20	0.17	0.00377358	0	1	531	0	0	1	0	1	-1		-1	0.489657
C2_02310W_A	117	14068.8	139	0.27	0	0	0	747	2	78	0.716198	0.0535395	0		-1	-1	0.488867
C5_00920W_A	27.15	5196.15	27	0.14	0.00448431	0	1	447	6	543	0.914989	0.169258	1	1		-1	0.488862
CR_02770C_A	24.93	17557.1	7	0.14	0.0051458	0	1	1170	0	0	1	0	0	-1		-1	0.488576
C3_05560W_A	144.81	34460.4	12	0.17	0.00310559	0	1	645	3	113	0.499225	0.0405394	7		1	-1	0.486547
C7_00470C_A	35.24	2015.14	73	0.17	0.000664452	0	1	1506	4	55	0.891766	0.0284568	16			-1	0.485944
CR_04090C_A	313.84	54601.7	8	0.39	0.00168729	1	0	1779	2	2	0.62226	0.0200748	1			-1	0.485412
CR_01950W_A	74.68	12974.5	435	0.17	0.00778643	0	1	900	3	4	0.455556	0.0950575	0	1		-1	0.48506
C1_01160C_A	43.51	17272.6	430	0.12	0.00123153	-1	-1	813	1	115	0.801968	0.0264984	2	1		-1	0.48492
CR_09480W_A	15.86	690.293	75	0.15	0.00290698	0	1	1377	3	14	0.47785	0.0610419	0	1		-1	0.484554
C2_07300C_A	70.89	33257.1	326	0.17	0	-1	-1	372	2	140	0.741935	0.0561762	1	1		-1	0.482826
C4_01440W_A	41.86	839.046	151	0.18	0.00147602	0	1	1356	2	2	0.707965	0.0183266	0	-1		-1	0.48258
C5_01060C_A	26.89	30254.5	235	0.15	0.00122699	-1	-1	816	3	5	0.398284	0.0528039	0	1		-1	0.482361
C2_02730W_A	66.13	12783.7	44	0.14	0.00366636	0	1	1092	1	1	0.932234	0.0141905	1	-1		-1	0.481515
CR_09900C_A	10.21	1025.11	43	0.16	0.000940734	0	1	2127	3	18	0.696756	0.0337994	1			-1	0.481282
C2_02510W_A	126.34	205764	109	0.28	0	-1	-1	963	3	4	0.464174	0.0713968	0	1		-1	0.480341
C4_00890W_A	84.04	4590.65	4	0.27	0.00128894	-1	-1	4656	7	13	0.289089	0.0351481	7	1		-1	0.479651
C1_04880C_A	55.31	14684.7	283	0.18	0.00552486	-1	-1	363	0	0	1	0	1			-1	0.479016
CR_00860C_A	2617.98	4.68429e+06	103	0.64	0	-1	-1	504	1	1	0.789683	0.0505422	8			-1	0.478889
C3_02830W_A	12.84	534.37	121	0.16	0.00346675	0	1	3174	7	12	0.589792	0.0164287	0	-1		-1	0.478761
C5_01640W_A	31.68	5170.16	208	0.18	0.000637755	0	1	1569	8	322	0.513703	0.0463437	11			-1	0.478538
C2_09160W_A	17.2	1136.14	311	0.16	0.0029615	0	1	1014	8	748	0.804734	0.0857602	0	1		-1	0.478186
C1_13060C_A	69.87	6884.51	293	0.41	0.00131291	-1	-1	2286	3	3	0.545057	0.0530673	0	-1		-1	0.477031
CR_10290C_A	17.7	5148.43	37	0.13	0.000523013	0	1	3825	8	149	0.848627	0.0544323	0	-1		-1	0.476528
C1_03070C_A	26.49	2503.78	4	0.13	0.00124121	0	1	2418	7	210	0.385443	0.0891505	1	1		-1	0.476049
C3_03300C_A	33.85	854.01	5	0.17	0.00219459	0	1	1368	46	3379	0.584064	0.231644	8	1		-1	0.475618
C2_06830C_A	16.18	879.208	77	0.15	0.00722961	0	1	3459	6	292	0.888118	0.0278248	1		1	-1	0.475042
CR_07400C_A	582.44	277080	1	0.47	0.00135593	-1	-1	1476	6	81	0.404472	0.0373685	4	1		-1	0.47477
C7_01650W_A	71.76	23972.7	8	0.18	0.00688791	0	1	1598	8	544	0.849794	0.0440637	5	-1		-1	0.474248
CR_08010W_A	42.34	10435.8	12	0.1	0.00628931	0	1	319	2	131	0.867521	0.068633	5		1	-1	0.472716
C1_10160W_A	674.16	984014	211	0.6	0	-1	-1	924	2	23	0.755411	0.0643461	0		-1	-1	0.472682
C3_07150C_A	1805.17	3.04265e+06	212	0.64	0	-1	-1	432	4	326	0.898148	0.104261	0			-1	0.472292
CR_00350W_A	75	16207.7	0	0.2	0	1	0	1206	2	2	0.458541	0.0482436	7			-1	0.472023
C4_04390W_A	1688.46	7.18096e+06	129	0.64	0.0105708	1	0	947	1	45	0.610667	0.0240182	1			-1	0.471927
CR_06090W_A	44.95	37575.4	8	0.11	0	0	1	987	0	0	1	0	0	-1		-1	0.470204
C2_02120W_A	36.68	2445.9	294	0.17	0	-1	-1	1056	3	3	0.393939	0.0667335	1	1		-1	0.47
CR_02890C_A	21.18	1212.24	315	0.16	0.00391718	0	1	1788	3	5	0.370805	0.0445135	0	-1		-1	0.469918
C4_04510W_A	16.43	459.532	14	0.14	0.00190522	0	1	4200	14	1068	0.505952	0.0254938	1			-1	0.469606
C2_06540C_A	56.89	8240.31	6	0.29	0.00108962	-1	-1	3672	6	249	0.526688	0.0346955	0			-1	0.469501
CR_04740C_A	56.3	3149.22	66	0.27	0.00218872	-1	-1	4113	6	23	0.383905	0.0284715	0			-1	0.469472
C5_02590C_A				0.16	0.00471185	-1	-1	2757	7	163	0.483859	0.0175421	0			-1	0.469387
CR_08020C_A	376.09	144353	99	0.38	0	-1	-1	180	0	0	1	0	12	1		-1	0.468556
CR_03680C_A	12.24	734.294	86	0.2	0.00188071	0	1	3723	9	62	0.265109	0.0423944	2	1		-1	0.468393
CR_10470C_A	36.69	3773.31	276	0.19	0.000626959	0	1	1596	6	351	0.572682	0.0623349	4	-1		-1	0.467347
C2_01110C_A	133.69	34779.2	112	0.21	0.000726744	-1	-1	1380	3	84	0.647826	0.0436398	1		-1	-1	0.466046
C2_04020C_A	47.12	18782.7	76	0.18	0.00266904	0	1	1125	5	96	0.948444	0.08693	0		-1	-1	0.46545
C1_06760C_A				0.16	0.00311721	0	1	1607	8	148	0.469197	0.0447982	5	-1		-1	0.463123
C3_05240C_A	1390.23	1.55293e+06	200	0.52	0	-1	-1	789	5	166	0.457541	0.0389158	13			-1	0.462164
C3_01700W_A	33.5	795.315	146	0.2	0.00310009	0	1	2259	5	14	0.329349	0.0245187	0	-1		-1	0.462117
C3_03400C_A	57.65	15761.4	175	0.12	0.00386598	0	1	777	4	341	0.865443	0.0377284	6	-1		-1	0.460849
C6_02240C_A	2969.55	4.55614e+06	172	0.58	0.00153139	1	0	654	3	92	0.640673	0.0812196	0	1		-1	0.460614
C4_03180W_A	92.22	72895.5	0	0.3	0.00734574	0	1	2043	2	84	0.767499	0.0116939	2	-1		-1	0.460085
C3_05830W_A	47.69	17236.3	0	0.18	0.00180018	1	0	2223	6	313	0.384166	0.0226021	0	-1		-1	0.459084
C5_04070C_A	96.04	14913.2	10	0.17	0	0	1	309	0	0	1	0	0	-1		-1	0.458682
C5_03760C_A	26.6	422.151	95	0.21	0.00416811	0	1	2880	4	114	0.587153	0.0161647	0	-1		-1	0.457386
C2_10770W_A	116.04	64423.5	48	0.14	0	0	1	336	0	0	1	0	1	-1		-1	0.457002
C2_04590C_A	734.28	950342	72	0.36	0	-1	-1	288	0	0	1	0	1			-1	0.456965
CR_05780W_A	194.43	23309.9	13	0.41	0	-1	-1	1539	0	0	1	0	0		-1	-1	0.456683
C2_05670C_A	20.73	2095.66	295	0.15	0	0	1	801	2	147	0.883895	0.0377407	0	-1		-1	0.456488
CR_04010C_A	92.97	92413.8	306	0.21	0.000984252	-1	-1	1017	2	215	0.605703	0.0368532	1			-1	0.456354
CR_00720W_A	0	54.6545	0	0.16	0	0	0	324	0	0	1	0	1			-1	0.456317
C1_03230C_A	103.38	15899.3	276	0.25	0.00177096	-1	-1	1695	4	23	0.739823	0.0459964	1			-1	0.455711
C2_05500W_A	667.7	317255	57	0.44	0.00142653	-1	-1	702	0	0	1	0	0			-1	0.455389
C4_01650C_A	18.31	990.47	1	0.17	0.0013369	0	1	1497	15	947	0.57849	0.209389	0	1		-1	0.454975
CR_05080W_A	43.24	3436.02	242	0.23	0.000677507	-1	-1	1477	3	4	0.726241	0.0472248	0			-1	0.454753
C3_00410C_A	7.71	1340.96	0	0.12	0	0	0	546	0	0	1	0	0			-1	0.454742
C2_02380W_A	116.15	8907.36	9	0.2	0.00928218	0	1	1617	2	10	0.502165	0.0247617	1	-1		-1	0.454562
CR_05960W_A	19.57	7074.52	0	0.12	0	0	0	276	0	0	1	0	0			-1	0.453424
C2_01710W_A	24.83	41875.5	1	0.12	0	0	0	321	0	0	1	0	0		-1	-1	0.453333
C1_08600C_A	75.48	7038.85	107	0.17	0.00272975	0	1	2199	7	182	0.406548	0.043784	7	-1		-1	0.452974
C5_03840W_A				0.15	0.00406918	0	1	981	4	17	0.505607	0.0614193	1	-1		-1	0.452822
C1_07970C_A				0.16	0.00272183	-1	-1	3672	7	150	0.279139	0.0264907	1		-1	-1	0.452244
C5_05310W_A	233.35	294585	0	0.17	0	0	1	591	63	7505	0.164129	0.970978	48	1		-1	0.451818
C7_03120W_A	63.76	26500.4	135		0.00166389	0	1	1203	1	384	0.985037	0.00765657	6	-1		-1	0.451535
C7_01830W_A	9.03	1341.97	42	0.15	0.0101156	0	1	693	0	0	1	0	0	1		-1	0.451267
C1_03980W_A	7.47	149.394	16	0.15	0.0056926	0	1	528	2	2	0.75	0.0743473	0	1		-1	0.448282
C5_03410C_A	53.37	23275.1	374	0.19	0	-1	-1	522	1	29	0.804598	0.0308925	0		1	-1	0.44827
CR_04110W_A	24.23	5204.41	222	0.17	0.00687679	0	1	1746	11	631	0.690149	0.116651	10	1		-1	0.448218
CR_06850C_A	47.23	11244.2	0	0.18	0.00704225	-1	-1	285	1	5	0.981481	0.0491914	2			-1	0.448114
C2_05320W_A	16.34	376.177	95	0.16	0.00304568	0	1	1971	7	11	0.411466	0.0526978	0	-1		-1	0.447166
C2_05930W_A	954.41	2.61398e+06	25	0.44	0	-1	-1	186	0	0	1	0	2			-1	0.446056
C1_06080C_A	44.04	2264.99	236	0.2	0.00288462	0	1	1041	1	28	0.98463	0.00756821	0	-1		-1	0.445733
C5_02130W_A	0.19	950.267	0	0.07	0.0017301	0	0	579	0	0	1	0	0			-1	0.445184
C3_07460W_A	19.56	929.837	1	0.19	0.00303556	0	1	2307	6	118	0.671001	0.0188705	0	-1		-1	0.444894
C2_08060W_A	34.31	22336.8	0	0.11	0	0	0	210	1	17	0.6	0.0607679	0			-1	0.444536
CR_07720C_A	14.26	1264.8	21	0.16	0.00287522	0	1	1740	2	2	0.694828	0.00897922	6	1		-1	0.444201
C7_02950C_A	30.39	9767.56	39	0.15	0.00394737	0	1	1521	27	2128	0.421433	0.134839	2	1		-1	0.444071
C3_03650W_A	61.56	8726.12	281	0.18	0.00142857	0	1	1401	10	306	0.701642	0.0337459	18	-1		-1	0.442944
C7_00210C_A	15.28	1224.78	0	0.14	0.0046492	0	1	2367	2	47	0.78158	0.00913604	0	-1		-1	0.442593
C1_11380W_A	68.42	4892.5	506	0.22	0.00124533	0	1	804	2	2	0.649254	0.059787	1	-1		-1	0.442511
C3_04960W_A	1624.45	2.89301e+06	143	0.5	0.0137157	-1	-1	803	0	0	1	0	1			-1	0.442139
C7_00990W_A	2346.91	6.15223e+06	56	0.76	0.00319829	0	1	939	13	2600	0.56443	0.163465	0			-1	0.44202
C7_04300W_A	86.03	13298.9	18	0.15	0.00689655	0	1	4206	5	250	0.530908	0.0246925	1	-1		-1	0.441744
C1_12760W_A	34.37	1361.31	272	0.24	0.00725389	0	1	966	0	0	1	0	1	-1		-1	0.440623
CR_10620C_A	29.92	8049.91	6	0.13	0.000500751	0	1	1998	4	491	0.992492	0.0425116	1	-1		-1	0.440548
C3_05760W_A	18.82	2087.47	43	0.19	0.000956023	0	1	1047	3	323	0.761223	0.0272223	2			-1	0.440425
CR_03650W_A	21.75	909.196	370	0.18	0.00131796	0	1	3036	7	11	0.349144	0.0466558	0	-1		-1	0.440411
C2_06230W_A	39.85	3978.59	3	0.15	0.00612557	0	1	2613	33	3289	0.340605	0.189215	3	1		-1	0.440392
C5_03110C_A	25.39	7168.92	203	0.13	0	0	1	458	0	0	1	0	0			-1	0.440246
CR_03270W_A	6.7	1851.82	6	0.2	0.00398671	0	0	1506	1	13	0.988712	0.0162348	1	1		-1	0.439912
C2_09670C_A	65.04	36250.8	4	0.15	0.00452489	0	1	885	3	37	0.571751	0.0274735	3	-1		-1	0.437289
C1_04070C_A	6.89	230.961	281	0.17	0.00252101	0	1	1191	1	64	0.980126	0.0183995	1			-1	0.437257
C1_10960W_A	40.91	6612.99	158	0.14	0.00130719	0	1	766	1	26	0.886494	0.0213657	4			-1	0.436733
C6_01150W_A	30.49	1357.82	4	0.15	0.00262605	0	1	1905	8	324	0.928084	0.0750081	0	-1		-1	0.436299
C4_04290W_A	18.75	1312.8	59	0.17	0.00224048	0	1	2679	21	923	0.470698	0.0681615	18	1		-1	0.43612
C1_06790C_A	108.27	1.98119e+06	208	0.14	0.00232019	-1	-1	432	0	0	1	0	1			-1	0.435965
C1_00590W_A	401.18	126820	214	0.58	0.00234375	-1	-1	1281	5	193	0.355972	0.0568391	1			-1	0.43524
CR_03100W_A	12.04	540.044	69	0.17	0.00279416	0	1	3222	2	2	0.530106	0.0096724	1	-1		-1	0.435172
C4_02420C_A	15.52	362.776	4	0.15	0.00250941	0	1	798	1	1	0.736842	0.0250106	0	-1		-1	0.434925
CR_10700W_A	73.84	31451.2	12	0.16	0	0	1	972	1	1	0.610082	0.0190777	1	-1		-1	0.434693
C4_02800W_A	26.7	2788.67	219	0.17	0.00662739	0	1	1359	0	0	1	0	0	-1		-1	0.434651
C2_00310W_A	0	2159.63	0	0.1	0.00448431	0	0	447	0	0	1	0	0			-1	0.434098
C5_03140C_A	20.29	1210.35	21	0.17	0.00605578	0	1	6276	16	736	0.489802	0.0302886	0	-1		-1	0.433706
C6_03460W_A	28.93	2497.45	8	0.16	0.00803443	0	1	3486	14	930	0.598107	0.0431479	14			-1	0.432698
C7_01000C_A	0	128561	0	0.08	0.007109	0	0	423	0	0	1	0	0			-1	0.4325
C1_08520C_A	84.84	19374	229	0.23	0	-1	-1	444	0	0	1	0	4		1	-1	0.432294
C1_08550C_A	146.74	15294.8	12	0.23	0.0027137	0	0	738	3	118	0.552846	0.0553036	0		-1	-1	0.432152
C3_06750W_A	153.68	67067.7	10	0.37	0	0	1	207	1	1	0.507246	0.061783	0	-1		-1	0.431447
C1_05230W_A	31.18	11980	357	0.16	0	0	1	588	1	4	0.954082	0.0264507	0	-1		-1	0.430718
C2_01320W_A	25.95	3155.95	84	0.24	0.0016116	0	1	1242	3	11	0.360709	0.0453878	4		-1	-1	0.43058
CR_06960W_A	20.27	520.738	93	0.17	0.00402685	0	1	1491	3	122	0.470825	0.0218232	0	-1		-1	0.43038
C2_03560C_A	62.5	8338.14	326	0.25	0.00440141	-1	-1	1137	2	3	0.617414	0.0310185	9	1		-1	0.429821
C1_01090C_A	117.01	121902	86	0.14	0.00649351	-1	-1	309	0	0	1	0	0			-1	0.429739
C4_05340W_A	6.47	95.5432	77	0.14	0.00636402	0	1	2358	16	1173	0.464801	0.0594232	22	1		-1	0.42952
CR_08590W_A	26	5314.72	130	0.15	0.000869565	0	1	2301	4	7	0.499348	0.0165336	0	-1		-1	0.42916
CR_06180W_A	113.81	5673.75	5	0.28	0.00433276	0	1	1155	4	555	0.522944	0.061329	0	-1		-1	0.427307
C6_01610W_A	2759.88	3.9342e+06	93	0.66	0.00754401	0	1	1194	2	11	0.465409	0.0711108	0		1	-1	0.425968
C5_04030W_A	14.62	62199.7	1	0.2	0.00437828	0	0	1143	3	127	0.549431	0.0386186	0		-1	-1	0.425834
C6_02980C_A	32.03	1921.76	11		0.00661058	0	1	1665	7	74	0.554354	0.0412027	2		-1	-1	0.425791
C1_11410C_A	7.79	1060.19	150	0.13	0	0	0	342	1	22	0.982456	0.0518129	0			-1	0.425586
C3_06890W_A	113.55	11915.8	21	0.28	0.00692941	1	0	2310	3	301	0.959307	0.0164508	5		-1	-1	0.425574
CR_09520C_A	12.14	230.057	34	0.18	0.00324441	0	1	2775	5	58	0.761081	0.0473238	0	-1		-1	0.425206
C7_03130C_A	10.73	414.901	0	0.17	0.0017301	0	1	579	0	0	1	0	20			-1	0.42479
CR_00400C_A	31.92	4311.73	15	0.18	0.00104877	0	1	1908	1	1	0.852725	0.010025	2	-1		-1	0.424665
C1_03900W_A	12.98	358.796	75	0.12	0.00194175	0	1	516	0	0	1	0	7		-1	-1	0.424597
C1_14350W_A	95.95	66661	2	0.14	0	0	0	444	0	0	1	0	2			-1	0.423271
C3_05770C_A	8.38	153.19	200	0.14	0.000656599	0	1	1524	0	0	1	0	0	-1		-1	0.421745
C1_00620W_A	43.7	23863.8	94	0.14	0.0010627	0	1	942	2	5	0.725053	0.0366242	1	-1		-1	0.421712
C3_04520C_A	84.28	21900.5	22	0.25	0.00117233	-1	-1	1707	53	4753	0.1529	0.0552459	9	1		-1	0.421534
C1_05660C_A	44.86	2655.47	38	0.18	0.00327103	1	0	4281	15	454	0.500818	0.0319194	0		1	-1	0.420428
CR_08830W_A	13	3.5266e+06	0	0.31	0	0	0	264	0	0	1	0	1			-1	0.420342
C2_02540W_A	31.8	2254.28	215		0.00309597	0	1	5169	4	8	0.329464	0.0170168	2	-1		-1	0.420304
C5_04490C_A	104.36	553390	1	0.27	0.00629591	-1	-1	954	3	72	0.666667	0.0341051	0			-1	0.420259
C1_06580W_A	3937.84	7.63248e+06	97	0.54	0	-1	-1	438	1	65	0.712329	0.0191913	0			-1	0.420076
C3_05390C_A	3.45	34.597	16		0.0020555	0	1	1947	5	137	0.93888	0.0161551	0	-1		-1	0.420021
C1_01130W_A	25.45	8079.08	2	0.15	0.000906208	0	1	2208	3	3	0.717391	0.0336562	0	-1		-1	0.419585
C1_12480W_A	5.99	558.32	94	0.13	0	0	0	503	0	0	1	0	0			-1	0.419495
C6_02470W_A	41.05	2298.16	66	0.18	0.0031463	0	1	1908	4	120	0.955451	0.0291522	4	-1		-1	0.41909
C1_11880W_A	96.96	23733.6	268	0.14	0	-1	-1	423	0	0	1	0	0			-1	0.418881
C3_06720W_A	18.03	618.35	50	0.16	0.00602864	0	1	2655	9	656	0.27646	0.0379882	1			-1	0.41841
C4_01450W_A	70.02	4533.19	338	0.25	0.00380228	0	1	1842	11	503	0.459826	0.103106	0	-1		-1	0.41814
C5_05320C_A	215.74	72989.5	1	0.26	0.00223214	-1	-1	897	63	5908	0.147157	0.639741	34	1		-1	0.417922
C3_01300C_A	40.18	30943.3	0	0.19	0.00591716	-1	-1	846	0	0	1	0	0		-1	-1	0.417568
C3_05650W_A	136.52	81437.4	54	0.21	0.00268998	1	0	1488	4	75	0.396505	0.0231503	5		-1	-1	0.41713
C1_12340C_A	93.89	17341.7	327	0.21	0	-1	-1	1011	0	0	1	0	0			-1	0.416953
C3_01080W_A	69.11	201405	135	0.18	0.00344828	-1	-1	291	1	12	0.945017	0.0540826	0			-1	0.416679
C4_00560C_A	15.79	1513.49	51	0.14	0.0030326	-1	-1	1320	4	22	0.913636	0.0425094	0	1		-1	0.415716
C2_03950W_A	78.3	149862	330	0.2	0.00752823	-1	-1	798	0	0	1	0	6		-1	-1	0.415409
C5_05230C_A	545.77	212982	52	0.45	0.0030326	-1	-1	1320	3	23	0.562879	0.024011	0	-1		-1	0.415384
C1_04490W_A	82.5	45221.3	4	0.19	0.00356824	0	0	1122	3	9	0.561497	0.0386047	4			-1	0.414796
C1_10830W_A	23.42	1662.76	14	0.19	0.00206612	0	1	969	2	37	0.915377	0.0441226	0	-1		-1	0.414449
C1_00180W_A	2985.14	3.97138e+06	268	0.58	0.00166113	1	0	603	3	74	0.910448	0.140767	0		1	-1	0.414028
C7_03070C_A	22.89	835.222	30	0.15	0.00157729	0	1	5073	13	913	0.261187	0.0214557	0	-1		-1	0.412807
C3_06630W_A	4.27	1383.77	21		0.00723982	0	1	2211	1	1	0.624604	0.00438578	0			-1	0.412709
C6_02440C_A	10.79	4405.68	59	0.14	0.0139535	0	1	861	8	261	0.384437	0.126361	2	1		-1	0.412036
CR_09730C_A	32.14	1885.01	333	0.21	0.00594354	1	0	1347	5	104	0.765405	0.079438	0			-1	0.411803
CR_04200W_A	323.02	115837	16	0.32	0.00254022	-1	-1	1182	2	117	0.677665	0.0364831	0		-1	-1	0.411361
C1_01000C_A	19.77	652.341	0	0.14	0.00183318	0	1	1092	2	34	0.685897	0.0315556	0			-1	0.410722
C2_00200W_A	35.48	79301.4	0	0.13	0.00492611	-1	-1	813	0	0	1	0	1	1		-1	0.410508
C7_03050W_A	71.84	25530.5	105	0.21	0.00332226	0	1	603	2	280	0.580431	0.0238133	14	-1		-1	0.410292
C5_00060C_A	30.77	13940.8	5	0.09	0.000625782	0	1	1599	1	19	0.788618	0.00921391	4	-1		-1	0.40953
C4_02370C_A	6719.79	5.08236e+08	7	0.8	0.0058651	0	0	342	1	137	0.552632	0.0783115	0		-1	-1	0.408878
C2_04030C_A	328.33	205231	87	0.4	0.00301205	0	1	333	1	13	0.555556	0.0591999	3	-1		-1	0.408056
C1_08160W_A	43.97	1561.46	46	0.17	0.00283554	0	1	1059	4	207	0.482531	0.0304334	0	-1		-1	0.407448
C2_08040C_A	3905.94	2.42427e+07	224	0.71	0.00296296	-1	-1	676	4	316	0.708683	0.140164	1			-1	0.406536
C3_03390C_A	56.43	5815.26	34	0.2	0	0	1	510	3	72	0.707843	0.0366088	2	-1		-1	0.405371
CR_08900C_A	43.01	3899.66	0	0.12	0	0	1	1098	8	868	0.496357	0.303006	0	1		-1	0.40448
C7_00560C_A	24.15	5366.19	168	0.16	0.00124069	0	1	807	1	101	0.997522	0.0113381	5			-1	0.403855
C3_00120W_A	0	4888.46	0	0.07	0	0	0	627	0	0	1	0	0			-1	0.403781
C2_01740C_A	63.01	8161.34	230	0.17	0	-1	-1	342	0	0	1	0	1			-1	0.403243
C2_07100W_A	66.87	4362.04	30	0.2	0.00425834	-1	-1	1410	3	9	0.625532	0.0313539	0			-1	0.40107
CR_01310W_A	679.35	286970	26	0.47	0.000877193	-1	-1	1141	1	1	0.546893	0.0256284	1			-1	0.400807
C2_06420C_A	58.97	3018.87	1	0.16	0.0031348	-1	-1	2553	6	51	0.501763	0.0439104	0			-1	0.400276
C7_02460C_A	50.5	7137.96	22		0.00391543	0	1	1278	26	2306	0.364632	0.137949	39	1		-1	0.399022
C1_00740C_A	117.46	8332.53	189	0.25	0.00281492	-1	-1	1422	0	0	1	0	1			-1	0.398355
C1_14490C_A	30.96	17370.6	4	0.13	0.00397351	0	1	756	1	13	0.580688	0.0224046	1		-1	-1	0.396889
C3_06440W_A	71.77	9459.13	4	0.12	0.00182371	0	1	3291	15	705	0.581282	0.0431982	19	-1		-1	0.395445
C6_02340W_A	99.27	55616.7	65	0.29	0.0076864	0	1	1302	5	614	0.457757	0.0781818	0	-1		-1	0.395358
C3_03060W_A	15.64	2539.71	8	0.15	0	0	1	483	0	0	1	0	0	-1		-1	0.394734
C7_01580W_A	15.99	861.11	45	0.21	0.00502067	0	1	3387	3	131	0.465013	0.00602578	1	-1		-1	0.393886
CR_01040C_A	25.06	1453.34	81	0.18	0	0	1	603	0	0	1	0	0	-1		-1	0.393748
C1_05640C_A	31.89	1400.44	365	0.15	0.00667223	0	1	1200	7	141	0.424167	0.0445883	3	-1		-1	0.393638
C6_02370C_A	38.93	2585.91	131	0.22	0.0034459	-1	-1	1452	0	0	1	0	0		-1	-1	0.393413
C3_01850W_A	55.71	5909.13	429	0.21	0.0028436	-1	-1	1056	0	0	1	0	1		-1	-1	0.391988
C4_03150W_A	13.42	188.772	13	0.15	0.00822168	0	1	3285	4	27	0.46484	0.0137466	8	1		-1	0.391919
C2_02800W_A	90.01	1.04862e+06	0	0.13	0	-1	-1	291	0	0	1	0	1			-1	0.390826
C6_01320W_A	15.19	636.95	23	0.2	0.00244222	0	1	11466	14	39	0.337171	0.0168503	0	-1		-1	0.390441
C5_01210W_A	87.88	16463.7	11	0.29	0.000961076	-1	-1	2082	6	163	0.274736	0.0326502	0	-1		-1	0.389825
C1_11550W_A	342.74	121807	334	0.2	0.00535714	0	1	561	3	57	0.520499	0.0799157	1	-1		-1	0.389384
C1_05250W_A	10.62	4291.64	0	0.1	0	0	0	615	0	0	1	0	0			-1	0.386281
C2_04510W_A	27.7	979.711	111	0.14	0.00333611	0	1	1200	1	1	0.864167	0.0203835	0	-1		-1	0.386262
CR_03910C_A	18.55	1827.55	9	0.12	0.00577265	0	1	2253	7	444	0.63249	0.0705325	7		-1	-1	0.386079
C5_00820W_A	76.2	17970.2	327	0.17	0.00117509	-1	-1	852	3	74	0.955399	0.0532587	1	-1		-1	0.385674
C2_04220C_A	176.26	45290.5	7	0.2	0.00110011	-1	-1	910	2	6	0.611111	0.0415588	0		-1	-1	0.385357
C6_03940C_A	93.86	12764.9	15	0.19	0.00566394	-1	-1	1590	4	4	0.767925	0.0176616	0		-1	-1	0.385308
C7_01290W_A	16.76	1109.69	84	0.18	0.00197628	0	1	507	5	167	0.625247	0.0818063	0			-1	0.385302
C4_03840C_A	20.63	428.875	276	0.16	0.00541712	0	1	924	1	9	0.979437	0.0106498	3	1		-1	0.384955
C1_01940C_A	47.49	3799.57	125	0.16	0.00197628	0	1	507	1	52	0.919132	0.0535583	5		-1	-1	0.384099
C6_03770C_A	43.49	25754.1	33	0.17	0.00248139	1	0	807	2	22	0.8228	0.0254978	0		-1	-1	0.383409
C2_06670C_A	13.69	793.53	51	0.2	0.00609756	1	0	2133	4	191	0.822316	0.0469103	0		-1	-1	0.383048
CR_04470W_A	8.23	4097.16	11	0.14	0.00328228	0	1	915	6	25	0.639344	0.174617	7	1		-1	0.382909
C2_02590W_A	78.48	632931	1	0.17	0.00269784	-1	-1	1113	2	2	0.823899	0.0478231	0	-1		-1	0.382745
C2_02870W_A	44.97	3550.56	19	0.13	0	0	1	655	2	2	0.901042	0.0721012	0	-1		-1	0.382427
C3_00490W_A	28.69	4434.54	131	0.14	0	0	1	1626	2	2	0.829028	0.0124365	0	-1		-1	0.382362
C5_01550C_A	1480.74	1.78506e+06	173	0.19	0.00819672	0	0	489	3	10	0.435583	0.0592052	7			-1	0.381979
C7_04150W_A	9.29	975.963	2	0.15	0.0024113	0	1	2904	1	4	0.980716	0.00342163	2			-1	0.381609
CR_00490W_A	116.63	11741.3	216	0.2	0.00113507	-1	-1	882	2	31	0.502268	0.0574304	1			-1	0.381202
C2_00830C_A	34.21	2154.91	22	0.18	0.00104712	0	1	1911	6	172	0.503401	0.0765123	2	-1		-1	0.381041
C3_06810W_A	9.57	153.163	108	0.17	0.00866694	0	1	2424	4	337	0.513614	0.0224686	0	-1		-1	0.380809
CR_08980C_A	12.92	1296.7	1	0.12	0	0	1	1563	11	1417	0.570058	0.259645	0		-1	-1	0.380741
C7_01020C_A	77.62	28508.1	293	0.2	0.00191939	-1	-1	522	2	67	0.913793	0.0442028	17			-1	0.380343
C5_04740C_A	33.86	9429.14	10	0.15	0.00351124	0	1	1425	9	339	0.454737	0.0671818	5	-1		-1	0.379966
CR_03720W_A	1006.18	1.18358e+06	7	0.64	0.00205973	-1	-1	972	2	5	0.47428	0.0427577	0	-1		-1	0.379835
C2_05000C_A	69.58	5283.02	247	0.2	0.00352526	-1	-1	852	2	29	0.456573	0.0492774	3	1		-1	0.379398
C4_01920W_A	138.91	27040.8	6	0.2	0.0107914	0	0	279	0	0	1	0	1			-1	0.378341
C1_00450C_A	162.41	74266.1	162	0.2	0.00184502	-1	-1	543	1	15	0.768212	0.0358433	3			-1	0.37827
C4_01280C_A	23.16	1006.74	40	0.15	0.00313234	0	1	1278	3	5	0.607981	0.036636	3	1		-1	0.37746
CR_10370W_A	244.12	35212.9	125	0.29	0.00116686	-1	-1	858	1	11	0.843823	0.0259379	0		-1	-1	0.376836
C1_08650C_A	22.17	41930.7	0	0.14	0.0042735	0	1	937	0	0	1	0	11			-1	0.376617
C4_00250W_A	22.56	512135	0	0.12	0.00185529	0	0	540	2	18	0.707407	0.0479547	0			-1	0.376616
C1_07360W_A	16.02	669.849	30	0.15	0.00332396	0	1	3912	11	412	0.248722	0.0243322	0	-1		-1	0.376578
C3_06200C_A	22.24	339.475	32	0.14	0.00122249	0	1	819	4	40	0.695971	0.0486768	0	-1		-1	0.375871
C1_11980W_A	12.79	6853.28	35	0.15	0.00195312	0	1	513	1	1	0.740741	0.0361202	0	-1		-1	0.375029
C4_02870C_A	245.51	78772.4	414	0.41	0.00623539	-1	-1	1284	3	115	0.556854	0.0263398	8	-1		-1	0.37375
C1_08870C_A	37.8	63319.7	326	0.21	0.002457	0	1	1629	18	2718	0.772253	0.119091	14	-1		-1	0.373497
C2_04960C_A	40.77	2091.54	38	0.18	0.00233645	-1	-1	429	0	0	1	0	0			-1	0.373289
C2_04620W_A				0.21	0.00377358	-1	-1	2916	7	258	0.511317	0.066433	0			-1	0.372847
CR_01420W_A	28.19	2403.74	16	0.16	0.00402414	0	1	1989	5	47	0.393162	0.0685304	2			-1	0.372673
C4_04820C_A	63.55	11025.1	347	0.19	0.00515464	-1	-1	777	2	116	0.888031	0.0281834	0			-1	0.372345
C3_03810W_A	17.52	623.838	1	0.13	0.000476417	0	1	2100	28	1638	0.667619	0.0601473	2	-1		-1	0.372085
C1_01600W_A	77.4	9413.21	294	0.21	0.00113507	-1	-1	882	2	49	0.962585	0.049908	3		1	-1	0.371772
C2_07330W_A	21.15	2385.85	30	0.15	0.00295381	0	1	7449	4	10	0.377232	0.00548095	2		-1	-1	0.371502
CR_00910W_A	2906.7	1.35765e+07	0	0.61	0.00609756	0	0	165	2	121	0.672727	0.338733	0			-1	0.371073
C4_04650W_A	19.62	2248.32	26	0.13	0.00417246	0	1	720	5	187	0.7125	0.0725841	0	-1		-1	0.370709
CR_02440W_A	9.2	11304.9	0	0.12	0.0240964	0	0	333	1	23	0.75976	0.0974752	0		-1	-1	0.370556
CR_07660C_A	45.48	1562.42	22	0.17	0.00327154	0	1	918	0	0	1	0	0	-1		-1	0.37041
C2_05300C_A	104.47	165202	437	0.24	0.00570963	-1	-1	1227	0	0	1	0	5	-1		-1	0.369614
CR_10830C_A	96.33	31256.4	25	0.25	0	-1	-1	477	1	1	0.582809	0.0320311	2			-1	0.369133
CR_01660C_A	75.52	5644.19	23	0.17	0.00120919	0	1	828	1	1	0.820048	0.0283427	1	-1		-1	0.368617
C4_03930C_A	29.17	3641.94	129	0.16	0.00681818	0	1	441	1	23	0.861678	0.0249323	1		-1	-1	0.368567
CR_08100C_A	80.41	33567.8	184	0.2	0.00142552	0	1	1404	16	1427	0.380342	0.0826645	36	-1		-1	0.368434
C5_03600W_A	49.75	10797.2	10	0.18	0.00136426	-1	-1	1467	6	402	0.571915	0.0465692	0			-1	0.368197
CR_07390C_A	84.08	10635.5	278	0.21	0.00651891	-1	-1	768	2	2	0.625	0.0246538	5		1	-1	0.368101
CR_08400C_A	139.25	28297	55	0.17	0	-1	-1	369	3	264	0.845528	0.0682856	0			-1	0.3675
CR_02950C_A	112.79	13545.5	214	0.19	0.00172117	-1	-1	582	0	0	1	0	0		-1	-1	0.367414
CR_09320C_A	204.22	26454	100	0.42	0.00173913	-1	-1	576	0	0	1	0	0	-1		-1	0.366912
C5_01390C_A	15.69	1949.27	70	0.15	0.00822368	0	1	609	0	0	1	0	1		-1	-1	0.365628
C1_04360C_A	712.36	594827	41	0.56	0.00398406	0	0	252	1	1	0.865079	0.0731386	2			-1	0.364799
C2_06290C_A	858.16	519640	92	0.5	0.0128388	-1	-1	702	0	0	1	0	2			-1	0.364639
CR_02370W_A	64.96	17121.6	63	0.27	0.00215983	0	1	927	5	43	0.573894	0.134139	1			-1	0.364485
C7_00700W_A	231.67	109640	5	0.4	0.00263158	-1	-1	381	0	0	1	0	1			-1	0.364298
C1_03630W_A	7.68	308.509	19	0.14	0.00649901	0	1	3540	2	20	0.555932	0.0100431	0	-1		-1	0.363801
CR_00230W_A	38.89	978.513	24	0.16	0.00144326	0	1	5544	16	1084	0.27868	0.0609055	2	-1		-1	0.363669
C6_04240W_A	10.37	757.137	250	0.14	0.00388349	0	0	516	2	304	0.879845	0.0293966	0			-1	0.363256
C2_06300W_A	42.62	122612	1	0.12	0.0110619	0	1	453	5	921	0.816777	0.192119	0	-1		-1	0.36269
C2_08610W_A	68.53	3406.92	10	0.21	0.00520059	0	1	1347	10	517	0.547142	0.0756189	12			-1	0.362648
C1_08440C_A	22.9	1616.96	5	0.12	0	0	0	372	1	17	0.776882	0.0282754	0			-1	0.362123
C5_03010W_A	9.2	835.967	25	0.17	0.00247402	-1	-1	2022	14	366	0.546983	0.0668144	0	1		-1	0.361875
C1_08540C_A	52.21	6531.53	118	0.17	0.00280636	1	0	2139	0	0	1	0	2		-1	-1	0.361873
C4_05570C_A	13.89	2055.39	39	0.13	0.00190355	0	1	1577	13	271	0.464262	0.0795831	1			-1	0.361867
C4_05230C_A	13.32	338.711	360	0.2	0.00259853	0	1	2310	7	74	0.351082	0.0341946	3	-1		-1	0.361707
C3_01630W_A	109.53	8622.56	29	0.39	0.00103627	-1	-1	1931	1	1	0.664509	0.00530032	0			-1	0.361432
C1_09370W_A	23.99	4495.2	8	0.15	0.00327511	0	1	1833	20	1296	0.250955	0.138966	2	1		-1	0.361362
C1_05420W_A	46.75	41121.5	5	0.14	0	0	1	558	1	40	0.550179	0.0140867	0	-1		-1	0.360955
C1_09530W_A	20	575.772	59	0.19	0.00217391	0	1	921	1	85	0.998914	0.0219581	1	-1		-1	0.360093
C2_01050W_A	18	2266.6	104	0.17	0	0	0	258	0	0	1	0	6			-1	0.360091
C1_11450C_A	236.84	76128.2	7	0.38	0.00432152	1	0	1158	1	11	0.782383	0.0209894	0		1	-1	0.360037
C1_09740C_A	16.67	24560.3	1	0.17	0	0	0	219	1	11	0.616438	0.0577408	17			-1	0.358592
C6_00420W_A	157.39	85759.1	34	0.18	0.00291545	0	0	344	0	0	1	0	6			-1	0.357608
C6_04120C_A	5.93	218.962	30		0.00304507	0	1	3252	6	30	0.702952	0.017204	7			-1	0.356934
C1_01370C_A	3244.93	1.14088e+07	134	0.64	0	-1	-1	641	1	16	0.738636	0.0890559	0			-1	0.356667
C4_02400C_A	5.8	47.0012	66	0.14	0.003314	0	1	2415	11	91	0.339545	0.103717	0			-1	0.356508
C5_02270W_A	140.51	17348.3	11	0.27	0.00456919	-1	-1	1533	61	5820	0.208089	0.430465	7	1		-1	0.356279
C2_04270W_A	24.61	2563.93	247	0.17	0.00196271	0	1	1020	0	0	1	0	3	-1		-1	0.355433
C1_14590C_A	242.56	111145	3		0.025	0	0	201	1	1	0.641791	0.0767152	1			-1	0.35482
C5_05250C_A	93.47	33490.4	340	0.25	0.00397351	-1	-1	756	1	4	0.892857	0.0125256	2			-1	0.354663
C4_02710C_A	111.12	30798.5	79	0.2	0.0065703	1	0	762	0	0	1	0	0	-1		-1	0.354184
C5_00320W_A	130.66	67538.3	40	0.13	0.00682594	-1	-1	294	1	5	0.982993	0.0416001	2			-1	0.353687
CR_01430W_A	21.94	2978.94	1	0.12	0	0	1	618	4	17	0.475728	0.167395	1		-1	-1	0.353383
C2_01600C_A	78.76	13916.4	3	0.18	0	-1	-1	1560	2	200	0.822436	0.0238943	0	-1		-1	0.353302
CR_04340W_A	53.28	6727.07	5	0.2	0.00154512	-1	-1	3237	7	226	0.405622	0.035561	3		-1	-1	0.352891
CR_07350W_A	26.72	4501.63	95	0.16	0.00407664	0	1	2454	20	984	0.693969	0.0708692	24		-1	-1	0.352326
C5_01100C_A	30.02	11799.4	48	0.21	0.00644238	-1	-1	1398	8	393	0.668813	0.111338	0	1		-1	0.352083
C6_04330W_A	13.78	945.979	417		0.00579151	0	1	2067	3	11	0.569424	0.0100561	11			-1	0.351801
C1_11400C_A	26.62	1356.87	72	0.22	0.0029637	-1	-1	4050	3	17	0.579012	0.0169981	0		-1	-1	0.351196
C2_04880C_A	25.13	10349.9	1	0.16	0.00125945	0	1	749	3	208	0.40721	0.0780222	3			-1	0.351117
C3_06240C_A	61.88	14957.6	66	0.19	0	-1	-1	213	0	0	1	0	1			-1	0.351
C1_00020C_A	271.26	729207	3		0.0192926	0	0	312	1	1	0.945513	0.157307	1			-1	0.350667
C1_03650C_A	147.57	84915.3	185	0.22	0.00197628	-1	-1	507	5	253	0.682446	0.173908	3	1		-1	0.350563
C2_10640C_A	86.17	28142.3	14	0.12	0.00332226	0	1	603	1	1	0.690476	0.014245	15			-1	0.350388
C3_06770W_A	8.66	80.8928	29	0.16	0.00855513	0	1	1053	7	307	0.757835	0.0691083	0			-1	0.350099
C5_01760C_A	11.91	649.015	13	0.14	0.000348432	0	1	2871	14	675	0.234761	0.0398189	18			-1	0.350017
C5_04840C_A				0.11	0.0148048	0	1	741	9	142	0.678812	0.229947	14	-1		-1	0.349764
CR_00890C_A	48.4	4022.39	0	0.15	0	0	0	261	1	1	0.509579	0.10571	1			-1	0.349315
CR_03460W_A	32.24	15394.5	2	0.12	0	0	1	1095	7	878	0.558904	0.170423	0	-1		-1	0.349188
C3_06820C_A	34	2200.41	17	0.13	0.010989	0	0	1548	6	51	0.302972	0.0565809	1	1		-1	0.348734
C1_03340C_A	73.9	13976.9	74	0.2	0.00227015	0	1	882	4	419	0.867347	0.100218	0	-1		-1	0.348641
C1_05180C_A	119.54	33605.9	105	0.23	0.00777202	0	0	387	1	1	0.837607	0.0944861	1			-1	0.348549
C1_10920W_A	11.98	353.809	0	0.12	0.00128783	0	1	1554	1	1	0.767696	0.0140422	4	-1		-1	0.348054
C1_04100C_A	985.16	954126	30	0.48	0.00235849	1	0	849	1	47	0.510012	0.0235339	1	-1		-1	0.347858
C3_05800W_A	13.19	2721.39	299	0.16	0.00141044	0	1	1419	2	7	0.694151	0.0136108	10	-1		-1	0.34772
CR_01300W_A	186.87	62807.7	142	0.22	0	0	0	378	1	13	0.609428	0.0736532	4			-1	0.34763
C1_03060C_A	62.88	8469.82	300	0.2	0	-1	-1	630	5	461	0.679365	0.235646	1	1		-1	0.347619
C2_00280C_A	18.16	17221.8	0	0.14	0.00307692	0	1	651	11	1022	0.568356	0.26328	7	1		-1	0.347619
CR_03530W_A	167.56	14543.6	48	0.25	0.00469759	-1	-1	1704	2	180	0.747066	0.029181	2	-1		-1	0.346509
C2_06960W_A	206.13	34503.6	145	0.51	0.00111982	-1	-1	894	0	0	1	0	1			-1	0.346419
C2_04790C_A	38.54	1754.82	293	0.18	0.00180832	-1	-1	1107	2	2	0.396567	0.0287608	1			-1	0.346319
C2_06160W_A	20.13	130578	0	0.1	0.00649351	0	0	309	2	412	0.941748	0.0812657	0			-1	0.346004
C5_00130C_A	300.87	90768.5	13	0.25	0.00251256	-1	-1	399	1	1	0.609023	0.0470914	9			-1	0.345076
CR_08560C_A	227.18	352421	0	0.13	0.0030349	0	1	660	33	3148	0.745455	0.519314	6	-1		-1	0.345011
CR_07000C_A	11.75	221.823	28	0.19	0.00346647	0	1	6636	8	501	0.60865	0.0146266	0	-1		-1	0.344693
CR_00980C_A	53.4	4634.55	41	0.19	0.00136674	0	1	2196	11	827	0.402095	0.144657	2			-1	0.344497
C3_01480C_A	23.23	2278.67	25	0.24	0	0	1	723	0	0	1	0	1	-1		-1	0.343917
CR_08210C_A	699.34	760606	8	0.65	0.000428633	-1	-1	2334	3	14	0.636247	0.0103007	4	-1		-1	0.343723
CR_00510C_A	127.22	1.15693e+06	4	0.29	0.00457143	-1	-1	876	1	1	0.878995	0.0274175	3	1		-1	0.342222
C4_01880W_A	40.95	1235.33	0	0.14	0.0045489	-1	-1	1320	4	4	0.337879	0.0470348	1		1	-1	0.342105
C3_04180W_A	133.53	24005.5	10	0.23	0	0	1	816	27	2219	0.631127	0.0917034	0	-1		-1	0.341992
C3_03280C_A	277.63	68960.9	14	0.21	0	-1	-1	402	0	0	1	0	1			-1	0.341688
C3_06570C_A	46.15	6621.52	0	0.2	0.00295421	-1	-1	678	2	29	0.974926	0.0312293	0		-1	-1	0.34125
C2_00840W_A	21.38	2465.83	74	0.14	0	0	1	1770	3	3	0.552542	0.0420234	2	-1		-1	0.34078
C5_02280C_A	16.74	36970.3	7	0.17	0.00647016	0	1	1392	1	1	0.623563	0.00717905	16			-1	0.340714
C2_00950C_A	42.07	2557.14	8	0.18	0	0	1	1089	3	38	0.77135	0.0760123	3	-1		-1	0.340639
C6_00790C_A	158.82	2.2231e+06	41	0.24	0.00264901	-1	-1	756	0	0	1	0	1		-1	-1	0.340245
C5_01280C_A	12.77	1384.27	68	0.17	0.00567779	0	1	1410	1	2	0.670213	0.00636923	0	-1		-1	0.339399
C4_06690C_A	189.66	68680.2	19	0.23	0.00193424	-1	-1	518	0	0	1	0	1			-1	0.338052
C1_13280C_A	84.9	14015.9	9	0.12	0	-1	-1	591	1	581	0.98308	0.0441737	0			-1	0.336286
C1_07950C_A	18.18	1637.24	420	0.21	0.005	0	1	801	6	510	0.750312	0.105066	0	-1		-1	0.33609
C3_07710W_A	38.77	5891.46	0	0.12	0	0	1	1425	10	489	0.556491	0.0648265	13	-1		-1	0.335221
C1_02250W_A	32.76	23565.1	2	0.18	0.00275862	-1	-1	726	2	15	0.498623	0.0656866	0			-1	0.335076
C2_00710W_A	52.5	11131.9	19	0.18	0.00518903	-1	-1	1350	3	249	0.557778	0.0602597	3	1		-1	0.335049
C3_06350W_A	41.09	68785.3	0	0.09	0	0	1									-1	0.335029
C1_06070W_A	80.98	16572.5	122	0.17	0.00184502	-1	-1	543	0	0	1	0	7	1		-1	0.335016
CR_04280C_A	16.36	879.943	4	0.13	0.00474777	0	1	1686	2	122	0.995255	0.0250146	0	-1		-1	0.334821
C1_09730W_A	30.03	7713.38	0	0.13	0.00240096	0	1	834	7	399	0.279376	0.11395	0		1	-1	0.334774
C1_02510W_A	22.02	2007.85	35	0.17	0.00820793	0	1	732	1	5	0.990437	0.0365273	0			-1	0.33465
CR_02500W_A	9.13	1474.66	13	0.15	0.00709677	0	0	1551	2	4	0.602192	0.0424186	0			-1	0.334475
C2_05830C_A	14.44	508.925	212	0.18	0.00130804	0	1	1530	0	0	1	0	5	-1		-1	0.334323
C2_01420C_A	8.24	124.425	33	0.16	0.00123762	0	0	1617	2	79	0.433519	0.0243213	0			-1	0.334228
C2_02370C_A	204.99	45797.4	12	0.29	0.0100273	-1	-1	1098	15	1555	0.204918	0.270919	2	1		-1	0.33404
CR_02680W_A	4.08	37.5163	126	0.19	0.00549451	0	1	2367	6	154	0.372624	0.0764941	0		1	-1	0.333901
CR_00540C_A	86	159228	203	0.41	0.005923	-1	-1	1014	3	30	0.455621	0.0611949	3			-1	0.333782
C1_09870W_A	7.27	369.319	7	0.13	0.00575043	-1	-1	1740	3	299	0.554598	0.0296489	0		-1	-1	0.333778
C1_00560W_A	38.79	7244.95	237	0.19	0.00255973	0	1	1173	0	0	1	0	14	-1		-1	0.333463
C7_02510W_A	46.31	4960.9	113	0.13	0.0168776	0	1	474	6	151	0.788804	0.0999653	1			-1	0.332943
C1_06690W_A	22.32	481.915	1	0.16	0.00312826	0	0	926	1	1	0.510799	0.00938526	0			-1	0.332848
C6_01640W_A	28.36	7682.03	48	0.13	0.00171233	0	1	585	6	611	0.487179	0.187596	13			-1	0.332389
C7_00890C_A	109.93	10491.5	9	0.24	0.0101523	0	1	789	8	878	0.65526	0.137379	0			-1	0.331504
C6_00270W_A	53.8	8533.06	3	0.11	0.00433526	0	0	693	0	0	1	0	3			-1	0.331372
C1_11330C_A	627.94	4.6165e+07	0	0.27	0	0	1	309	2	168	0.673139	0.150614	3	-1		-1	0.331345
C2_05790C_A	48.38	2129.91	0	0.18	0.0032955	0	1	2732	10	426	0.295838	0.0627121	9	-1		-1	0.33073
C2_09840W_A	4.93	51.0337	37	0.16	0.00529661	0	1	945	6	282	0.802116	0.0640947	1		-1	-1	0.330502
C1_00700W_A	62.01	4575.34	41	0.21	0.00273973	0	0	366	1	1	0.620219	0.0469124	5	-1		-1	0.33047
C3_02960C_A	12.85	309.246	34	0.16	0.00115128	0	1	4344	26	1516	0.265424	0.0416263	2		-1	-1	0.32923
C2_04950C_A	637.17	310729	53	0.48	0.00115473	-1	-1	867	1	152	0.72203	0.0252864	2		-1	-1	0.328963
C1_05270C_A	82.3	205838	187	0.23	0	-1	-1	720	8	216	0.845833	0.138138	0			-1	0.328819
C1_03540C_A	41.04	2228.32	70	0.14	0.004914	-1	-1	408	1	5	0.987745	0.0388042	0			-1	0.327837
C7_00750W_A	403.62	7.19045e+07	17	0.3	0	-1	-1	384	0	0	1	0	3			-1	0.327798
C1_06900C_A	571.65	2.10278e+06	7	0.29	0	0	1	638	18	1053	0.26327	0.256321	29			-1	0.3273
C1_07660W_A	2.17	51.5798	11	0.17	0.00224416	0	1	2229	2	7	0.931808	0.0163986	1	-1		-1	0.326551
C4_06600W_A	23.89	500.808	22	0.22	0.00729761	0	1	4386	26	1126	0.439808	0.0722868	1	-1		-1	0.325421
C7_04230W_A	203.86	170342	0	0.16	0.00321888	-1	-1	933	3	175	0.584137	0.0638093	0			-1	0.324979
CR_05100W_A	4.41	42.4257	108	0.16	0.00547445	0	1	3837	7	496	0.317435	0.033432	4		-1	-1	0.324665
C2_03180C_A	40.4	3934.49	3		0.0025355	-1	-1	9861	15	1251	0.24967	0.0425634	1			-1	0.32459
C6_01040C_A	14.17	3344.27	472	0.21	0.01002	0	1	2496	5	11	0.352163	0.0416061	2	-1		-1	0.324491
C4_00300C_A	24.46	849.358	13	0.14	0.00404995	0	1	2964	5	197	0.757422	0.0227733	4	-1		-1	0.324484
C1_14580C_A	41.87	9463.71	1	0.19	0.0151803	0	0	528	2	474	0.592803	0.0602181	0			-1	0.324149
CR_05330W_A	72.34	35257.9	0	0.12	0	0	0	186	1	112	0.709677	0.120486	0			-1	0.323968
CR_10100C_A	2.72	176588	1	0.39	0.000640205	-1	-1	1563	2	2	0.87588	0.0313142	0	-1		-1	0.323917
C2_03090C_A	94.7	28006.2	139	0.19	0.00299401	-1	-1	669	0	0	1	0	0	-1		-1	0.323799
C1_07600W_A	229.04	60884.5	34	0.33	0.00954198	-1	-1	525	2	73	0.645714	0.0379053	0		-1	-1	0.323672
C1_01260C_A	18.73	5395.09	1	0.17	0.00221239	0	1	453	3	12	0.966887	0.111403	1	-1		-1	0.323059
C4_00130W_A	46.74	1.35505e+08	3	0.62	0	0	0	726	3	43	0.604683	0.0685763	2		-1	-1	0.322328
C1_08220W_A	40.5	9058.28	19	0.17	0.000846382	-1	-1	2364	5	50	0.48731	0.0178617	0			-1	0.321269
CR_08940W_A	46.15	3822.54	347	0.15	0	0	1	1008	3	28	0.646825	0.115366	4	-1		-1	0.320671
C5_04000W_A	31.51	1155.03	126	0.22	0.00448833	0	1	1115	5	22	0.535441	0.060325	2	-1		-1	0.320624
C2_10210C_A				0.27	0.00571429	1	0	873	0	0	1	0	0	-1		-1	0.320581
C7_03720C_A	48	4329.73	12	0.22	0.0015932	-1	-1	1884	62	4046	0.240977	0.345414	7	1		-1	0.320287
C1_04410C_A	99	22597.4	4	0.17	0.00187617	0	1	534	2	2	0.514981	0.0560187	3	-1		-1	0.319988
CR_10740W_A	44.63	3370.4	1	0.12	0	-1	-1	678	1	1	0.917404	0.0210682	1		-1	-1	0.319215
C6_00950C_A	29.32	1956.36	267	0.24	0.0029889	-1	-1	2343	2	41	0.762697	0.0140789	0			-1	0.318424
C1_00510W_A	43.6	1476.67	5	0.12	0.00107643	-1	-1	930	3	13	0.52043	0.0475073	2	1		-1	0.318125
C3_04230W_A	6.52	280.69	15	0.15	0.0019253	0	1	2598	25	2442	0.475751	0.0263216	23	-1		-1	0.318084
C2_00090W_A	38.08	20849.3	8	0.1	0	0	0	627	0	0	1	0	10		-1	-1	0.316637
C3_06760W_A	49.1	8720.97	327	0.21	0.00483676	0	1	828	7	284	0.894928	0.0942503	3	-1		-1	0.316636
C3_00280C_A	13.04	155.36	0	0.12	0.00228658	0	1	2625	30	2620	0.652571	0.163436	12		-1	-1	0.316214
C1_01490W_A	408.46	193699	0	0.37	0.00664452	0	0	603	1	475	0.606965	0.0564854	2		-1	-1	0.31621
CR_07330W_A	100.69	38013.9	0	0.16	0	0	1	291	4	278	0.611684	0.113181	0	-1		-1	0.315814
CR_07380C_A	31.81	8677.55	33	0.14	0.00107296	0	1	933	5	336	0.730975	0.0512881	8	-1		-1	0.315671
C5_03850W_A	104.37	15132.9	143	0.19	0.00765306	0	0	393	3	24	0.641221	0.12671	0			-1	0.315596
C5_03120W_A	8.64	335.387	90	0.14	0.00345304	0	1	1449	6	18	0.521049	0.0543254	0	-1		-1	0.315294
C2_05470W_A	96.28	11613.3	153	0.22	0.00652174	-1	-1	921	2	9	0.903366	0.0329671	11	-1		-1	0.315284
C7_03000C_A	96.06	15250.3	226	0.22	0.00207469	-1	-1	483	1	336	0.991718	0.0139951	4		1	-1	0.315162
CR_04330W_A	18.24	591.172	46	0.13	0.00417014	0	0	1200	0	0	1	0	0		-1	-1	0.314639
C5_00420C_A	80.57	51609.5	246	0.15	0.00557103	-1	-1	360	3	109	0.836111	0.111058	0	-1		-1	0.314278
C7_01460C_A	4.46	113.717	223	0.19	0.00298013	0	0	3021	6	154	0.60907	0.0222997	0			-1	0.31424
C4_01980C_A	162.23	25078.8	19	0.27	0.0118168	-1	-1	678	2	2	0.361357	0.0502939	0	-1		-1	0.313929
C1_00220W_A	128.03	286884	4	0.47	0.00917993	-1	-1	1635	2	2	0.658716	0.0412508	1	-1		-1	0.312857
C6_01010W_A	2.65	306.853	0	0.16	0.0265252	-1	-1	378	1	26	0.907407	0.0540901	0			-1	0.312105
C2_04370W_A	57.22	4315.82	145	0.28	0.00162338	0	0	1233	1	74	0.932685	0.0137703	1		1	-1	0.312013
CR_03770C_A	2716.31	4.89167e+06	106	0.57	0.00189753	1	0	528	2	4	0.71875	0.256204	0		1	-1	0.311536
C5_03900W_A	5066.65	6.94584e+07	5	0.71	0	0	0	255	1	136	0.592157	0.0893717	1			-1	0.310787
CR_01970C_A	205.13	44012.2	21	0.32	0.0026738	-1	-1	749	1	1	0.693098	0.0417479	2			-1	0.309549
C2_09740W_A	88.57	23349.7	22	0.28	0.00563698	1	0	888	2	2	0.756757	0.0150532	0		1	-1	0.309113
C1_01110C_A	93.57	11824.2	283	0.29	0.00261609	0	1	1530	7	27	0.328105	0.0995886	7	-1		-1	0.308608
C7_01210C_A	46.78	7894.48	337	0.16	0.00717703	0	1	837	6	110	0.369176	0.0653073	3	-1		-1	0.308088
C1_11000C_A	75.15	30695.6	183	0.19	0	-1	-1	408	0	0	1	0	6	-1		-1	0.307516
C3_04820C_A	29.82	1265.27	33	0.18	0.0023555	0	1	5520	55	3068	0.386232	0.0268504	10	-1		-1	0.306645
CR_09760W_A	16.83	3273.08	12	0.17	0	0	1	537	2	14	0.834264	0.0817182	1	-1		-1	0.305484
C3_00460W_A	779.62	469572	98	0.5	0.00162075	-1	-1	618	1	52	0.978964	0.0163344	1			-1	0.303692
C7_01280C_A	12.74	1403.36	2	0.14	0.00309597	0	1	1293	5	33	0.402939	0.0345617	1	-1		-1	0.303236
C1_01630W_A	56.47	21554.8	13	0.26	0	0	0	684	2	213	0.546784	0.0631372	1		-1	-1	0.303235
C1_07700C_A	83.1	20624	72	0.26	0.00179372	0	1	1116	9	219	0.607527	0.114862	1	-1		-1	0.303185
C7_00150W_A	263.19	74948.1	1	0.22	0.00722543	-1	-1	693	1	4	0.97114	0.0150434	16			-1	0.303131
C2_02900W_A	25.21	7384.9	9	0.12	0.00571429	0	0	351	1	40	0.997151	0.0565874	1		-1	-1	0.302859
C3_04080W_A	557.09	725884	19	0.58	0.0095057	-1	-1	527	6	208	0.242647	0.0462099	12			-1	0.302801
CR_09240C_A	212.84	160009	0	0.33	0	-1	-1	444	0	0	1	0	2	-1		-1	0.302798
C6_02770W_A	90.28	23519	400	0.24	0.00289017	-1	-1	693	3	199	0.574315	0.0470186	4	-1		-1	0.302615
C5_04530W_A	70.15	187995	290	0.18	0.00380711	-1	-1	789	1	1	0.574144	0.0174177	5	-1		-1	0.302508
C2_10700C_A	55.67	26131.9	1	0.15	0.00229358	-1	-1	873	1	1	0.524628	0.00716983	2		-1	-1	0.302412
C3_00500C_A	16.19	3153.94	0	0.14	0.000855432	0	1	1170	1	1	0.976068	0.00868102	6	-1		-1	0.302393
C4_02880C_A	37.28	1451.11	179	0.2	0.00782269	0	1	768	1	220	0.665365	0.0148363	5	-1		-1	0.301933
C1_03800W_A	8.4	607.043	264	0.12	0.00429184	0	1	933	1	1	0.996785	0.0215625	0	-1		-1	0.301911
C1_06710W_A	24.18	652.177	15	0.15	0.00387973	0	1	1032	4	78	0.562016	0.0359886	0	-1		-1	0.301792
C1_01320W_A	111.31	9966.44	35	0.23	0.00393185	-1	-1	1527	3	19	0.870989	0.0409398	1	-1		-1	0.30125
C1_02820W_A	33.58	2247.59	8	0.24	0.00166113	-1	-1	4215	57	6763	0.126928	0.227929	0	1		-1	0.301139
C1_04380W_A	55.17	22544.7	0	0.2	0.00529661	-1	-1	945	3	100	0.949206	0.0525612	0	-1		-1	0.30096
C3_03890W_A	17.21	2002.58	15	0.14	0.00124969	0	1	4002	26	2001	0.261619	0.0318216	3	-1		-1	0.300716
C2_01180W_A	32.97	23760.8	4	0.32	0	-1	-1	186	2	4	0.666667	0.247393	0			-1	0.300417
C7_00730W_A	231.04	115875	11	0.24	0.00191939	-1	-1	522	0	0	1	0	3		-1	-1	0.300298
C4_04600C_A	19.96	2277.09	13	0.13	0.00168492	0	0	1188	4	254	0.96633	0.034125	1		-1	-1	0.299967
C5_00790C_A	69	8107.78	0	0.19	0.00524809	0	1	2097	30	1738	0.428708	0.181271	1	-1		-1	0.299954
C2_05730C_A	25.93	3954.93	60	0.17	0.0082361	0	1	1458	2	2	0.66118	0.0237126	1	-1		-1	0.299759
C3_02230C_A	9.67	274.052	173	0.18	0.00476316	0	1	3780	20	817	0.555556	0.0432405	2	-1		-1	0.29929
C1_13550C_A	45.48	1517.55	56	0.11	0.00296516	0	1	1350	1	34	0.975556	0.0156565	9	-1		-1	0.299166
C3_01760W_A	54.54	2269.57	9	0.24	0.00293255	-1	-1	2388	10	836	0.570771	0.046682	2			-1	0.299097
C2_01440C_A	47.71	7743.46	22	0.18	0.00247525	-1	-1	405	0	0	1	0	3			-1	0.298852
CR_02140W_A	79.81	21392.9	32	0.16	0.00121951	-1	-1	821	1	1	0.651941	0.0282928	1		-1	-1	0.298826
C3_04810C_A	1441.24	1.0622e+06	68	0.53	0.00234926	-1	-1	1278	105	12618	0.0472637	0.290407	33			-1	0.298501
CR_01190C_A	24.56	4913.77	0	0.14	0	0	1	297	3	129	0.531987	0.292337	3	-1		-1	0.29812
C4_00140C_A	105.15	21313.5	2	0.22	0.00357711	-1	-1	2517	51	5844	0.0762813	0.337033	20	1		-1	0.297326
CR_09600C_A	105.49	245118	85	0.24	0.00397614	-1	-1	504	1	14	0.78373	0.0541096	0			-1	0.297278
C5_00900C_A	64.79	15858.7	230	0.28	0.000929368	-1	-1	1077	18	1341	0.216342	0.220934	23	1		-1	0.297198
C3_06910C_A	44.22	5712.03	264	0.26	0.0031072	-1	-1	1932	5	58	0.330228	0.0331813	2		-1	-1	0.297026
C1_14470W_A	72.14	18315.3	6	0.06	0.00137363	0	1	729	7	974	0.404664	0.149883	3	-1		-1	0.296703
C3_00350W_A	46.37	22694.1	74	0.18	0.00321027	0	1	624	0	0	1	0	11	-1		-1	0.296172
CR_10580W_A	82.42	37179	1	0.16	0	1	0	1272	14	1005	0.324686	0.255373	6	1		-1	0.295873
C7_02930C_A	55.58	3997.08	147	0.17	0.00306749	0	1	1305	1	2	0.985441	0.00627262	9	-1		-1	0.295351
C3_07420W_A	192.68	61253.7	377	0.26	0.0020284	0	0	987	9	369	0.273556	0.0660131	17		-1	-1	0.295155
C2_04650C_A				0.16	0.00123609	-1	-1	807	1	34	0.936803	0.0310128	0			-1	0.29508
C2_05620W_A	11.28	5102.21	22	0.16	0	-1	-1	213	0	0	1	0	0			-1	0.294833
C7_03540C_A	27.34	2169.62	353	0.2	0.0071048	0	1	2253	26	1951	0.425655	0.12643	0			-1	0.294782
CR_10010C_A	66.77	7544.08	227	0.21	0	-1	-1	1308	2	214	0.980887	0.0215667	0	-1		-1	0.294515
C2_06950C_A	38.51	7051.19	220	0.17	0.00698324	-1	-1	717	0	0	1	0	2			-1	0.294235
C4_04700W_A	340.21	57355.3	316	0.34	0.00493218	-1	-1	1623	12	1304	0.608749	0.0610717	11			-1	0.293621
C6_04210C_A	10.86	1688.07	23	0.15	0.00222025	0	1	2253	6	283	0.792721	0.0219662	13	-1		-1	0.293568
C4_06850C_A	103.49	25428.1	256	0.21	0.000896861	-1	-1	1116	1	1	0.650538	0.0117652	0	-1		-1	0.293172
CR_06700C_A	124.58	25829.7	0	0.23	0.0102696	-1	-1	780	1	1	0.514103	0.011931	3			-1	0.293095
C3_03090W_A	7.9	99.3424	115	0.17	0.00161377	0	0	1860	8	429	0.444624	0.0297344	1		-1	-1	0.293069
C2_00290W_A	22.34	73581.4	6	0.12	0.00476947	0	1	630	2	20	0.477778	0.048405	9	-1		-1	0.292713
C4_00660W_A	79.13	12370.4	398	0.24	0	-1	-1	741	4	261	0.704453	0.0573149	4	-1		-1	0.292513
C7_02640W_A	73.83	4052.88	39	0.3	0.00158814	-1	-1	1890	9	149	0.668254	0.0389666	0	-1		-1	0.291135
C2_02630W_A	13.03	1377.67	86	0.14	0.00304646	0	1	1314	3	3	0.488584	0.0567271	0	-1		-1	0.290461
C7_01600W_A	66.8	6143.32	295	0.24	0.00177936	-1	-1	1125	9	452	0.717333	0.0520429	0			-1	0.290371
C1_04420C_A	126.1	40989.6	20	0.27	0.00238379	0	1	840	7	359	0.385714	0.117837	1		-1	-1	0.290098
C1_09960W_A	88.76	31999.2	50	0.16	0.00471698	-1	-1	425	1	1	0.645062	0.0508264	8			-1	0.28952
C5_03400C_A	85.23	39984.6	40	0.16	0.00379507	-1	-1	527	1	1	0.645161	0.0456656	11			-1	0.289294
C1_11040W_A	2989.33	7.50382e+06	125	0.61	0	-1	-1	192	3	30	0.432292	0.330885	0			-1	0.289244
C3_04500C_A	2837.37	4.30907e+06	178	0.64	0	-1	-1	1009	23	2232	0.198953	0.0697547	18			-1	0.288966
C3_04760C_A	13.37	922.646	38	0.16	0.00165125	0	1	6057	113	10896	0.203401	0.0468266	3		-1	-1	0.288266
C6_02380W_A	87.41	9279.42	418	0.18	0.00479904	-1	-1	1668	1	24	0.752398	0.0111184	1	-1		-1	0.288085
C3_04390W_A	465.62	134043	5	0.43	0	-1	-1	781	5	273	0.73913	0.025268	13			-1	0.287997
C1_00570C_A	12.5	29617.9	2	0.12	0.00125839	-1	-1	2385	8	97	0.4826	0.0515703	0			-1	0.287667
C1_02770W_A	107.99	154587	0	0.24	0	-1	-1	297	0	0	1	0	3			-1	0.287631
C3_00640W_A	37.48	2436.34	16	0.21	0.00269542	0	0	1485	2	7	0.437037	0.0169185	0	-1		-1	0.287581
C7_02480W_A	49.72	6363.83	92	0.15	0.00582524	-1	-1	516	2	205	0.511628	0.0259697	24			-1	0.28747
C2_00160C_A	134.59	59297.4	2	0.12	0.0015674	0	1	639	3	167	0.56651	0.106252	5	-1		-1	0.287298
C5_05330C_A	32.5	21015.4	0	0.11	0.0040568	0	1	987	11	609	0.452888	0.112458	0	-1		-1	0.286595
C1_11130W_A	12.43	4445.66	0	0.13	0.00285307	0	1	702	2	410	0.777778	0.0561955	3	-1		-1	0.286554
CR_03940W_A	32.58	1512.6	261	0.15	0.00363636	0	1	1101	4	4	0.500454	0.07062	2			-1	0.285464
C4_06400C_A	79.57	6152.52	34	0.26	0.00498132	-1	-1	804	0	0	1	0	0			-1	0.285371
C1_08140W_A	20.88	9099.27	0	0.12	0.00204082	0	1	981	3	100	0.732926	0.0277656	20	-1		-1	0.285319
C2_06660W_A	12.18	3120.25	169	0.14	0.00370828	0	1	810	3	3	0.411111	0.0880779	0			-1	0.28426
C4_03730C_A	12.7	468.816	260	0.18	0.00444774	0	1	1350	5	474	0.592593	0.0308816	2	-1		-1	0.284238
C3_01600W_A	86.54	12437.1	0	0.24	0.000924214	1	0	1083	3	81	0.875346	0.0299981	1	-1		-1	0.284212
C1_00160C_A	427.88	257682	213	0.36	0.0108153	-1	-1	1203	6	127	0.353283	0.126404	2		-1	-1	0.283912
C1_12610W_A	72.7	6950.65	149	0.14	0	-1	-1	663	0	0	1	0	2			-1	0.283402
C7_02870C_A				0.15	0.004	0	1	498	12	604	0.528112	0.228328	0	-1		-1	0.283066
C4_02340W_A	138.67	653145	224	0.29	0.00522193	-1	-1	384	8	615	0.677083	0.428333	5			-1	0.282184
C1_07810C_A	4.58	1280.36	17	0.15	0.0136564	0	0	2271	7	78	0.479524	0.0257269	0			-1	0.281896
C1_06770W_A	38.64	4619.3	233	0.17	0.0026264	0	1	1524	17	1299	0.793963	0.0953255	5	-1		-1	0.281308
C4_06130W_A	13.82	596.106	26	0.19	0.00287456	-1	-1	11481	22	1136	0.247627	0.016594	0			-1	0.280625
CR_07010W_A	157.87	23277.1	1	0.37	0.00316901	-1	-1	2841	18	2189	0.386132	0.0601583	6			-1	0.280385
C2_00110W_A	32.93	59117.8	0	0.12	0.00481541	0	0	624	0	0	1	0	4	-1		-1	0.280114
C2_10280C_A	66.34	4665.9	32	0.18	0.00718133	-1	-1	2229	11	584	0.271871	0.0513031	0			-1	0.279877
C1_02660C_A	46.49	6766.64	81	0.17	0.00241838	-1	-1	828	0	0	1	0	0	-1		-1	0.27984
C2_01370C_A	31.53	8478.94	110	0.19	0.00269397	0	0	1857	3	35	0.613355	0.0262201	2			-1	0.278866
C6_04500C_A	21.44	142417	6	0.13	0.00140285	0	1	4278	65	6181	0.353904	0.0869884	11			-1	0.278571
C3_00660W_A	10.44	2244.74	92	0.15	0.00109319	0	1	3660	26	3164	0.43224	0.0673166	22	-1		-1	0.278429
C5_00650C_A	73.17	9251.82	19	0.16	0	-1	-1	1074	12	393	0.235568	0.153175	8	1		-1	0.277549
C3_06970W_A	17.84	420.879	97	0.19	0.0032967	0	1	1821	12	586	0.482702	0.0790929	1	-1		-1	0.277491
C5_03290C_A	52.73	7122.43	134	0.17	0	-1	-1	288	2	16	0.829861	0.0913696	0			-1	0.276806
CR_01390W_A	160.66	32313	29	0.36	0.00137363	0	1	729	2	2	0.514403	0.0901497	0	-1		-1	0.275899
C1_04950C_A	12.13	1132.01	15	0.18	0.00478355	0	1	4188	9	83	0.205349	0.034859	1			-1	0.275474
C1_12970C_A	18.44	741.229	58	0.17	0.00310421	0	1	2256	10	1036	0.299202	0.0742054	0	-1		-1	0.275471
C6_03450C_A	16.78	408.721	106	0.18	0.0065764	-1	-1	2586	0	0	1	0	0			-1	0.274605
CR_04370W_A	17.17	1955.74	61	0.12	0.00509554	0	0	786	2	265	0.903308	0.044254	0			-1	0.273934
CR_06480C_A	8.66	1488.35	265	0.16	0.00240964	0	1	2076	12	715	0.614162	0.0922186	0	-1		-1	0.273265
C1_01070C_A	10.46	165.438	19	0.14	0.00491573	0	0	1425	2	3	0.848421	0.0232031	0		1	-1	0.272763
C1_07710C_A	93.73	9175.26	334	0.19	0.00184615	-1	-1	1626	7	215	0.598401	0.0511889	1		-1	-1	0.271619
C2_04740C_A				0.16	0.00478469	0	0	837	1	1	0.725209	0.0215089	0		-1	-1	0.271124
C4_06110C_A	103.05	12153.3	11	0.33	0.00237192	-1	-1	2109	67	6948	0.0967283	0.295533	7	1		-1	0.271001
C4_05640C_A	29.94	1510.52	2	0.14	0.00357568	-1	-1	840	22	1340	0.177381	0.244444	27	1		-1	0.270833
C4_02320C_A	474.05	648891	0	0.55	0.00705219	-1	-1	710	1	3	0.797849	0.0380985	3			-1	0.269798
CR_07030C_A	25.9	5431.4	384	0.19	0.0035503	0	1	846	3	32	0.618203	0.0326802	12	-1		-1	0.26925
C1_02620C_A	199.5	26409.9	4	0.37	0.00278035	-1	-1	1080	2	27	0.473148	0.0367296	4	-1		-1	0.268888
CR_05840W_A	24.18	835.028	20	0.16	0	0	0	720	1	27	0.548611	0.0181491	0			-1	0.268827
C1_02310C_A	24.41	1375.21	31	0.22	0.00273973	-1	-1	366	0	0	1	0	2			-1	0.268646
CR_03350C_A	27.35	2897.19	205	0.16	0.00287026	-1	-1	1743	5	55	0.467011	0.045873	0		-1	-1	0.268588
C2_00700W_A	52.59	12288.9	13	0.23	0.00393701	-1	-1	2541	6	287	0.381346	0.0647519	0		-1	-1	0.267978
C7_00330C_A	30	14110.1	240	0.11	0.00087108	0	1	1149	3	51	0.600522	0.0230659	16	-1		-1	0.267487
C2_05270W_A	25.59	816.119	332	0.18	0.00175685	-1	-1	2847	3	69	0.561644	0.0178672	0			-1	0.267412
C6_04360C_A	62.65	2720.76	27	0.16	0.00086881	-1	-1	1152	0	0	1	0	0			-1	0.267019
CR_02650C_A	27.69	8972.32	18	0.16	0.0105777	0	1	1230	2	2	0.513008	0.0675826	1	-1		-1	0.267017
C6_03220W_A	12.84	566.964	138	0.17	0.000921659	0	0	1086	5	77	0.422652	0.0619574	0		-1	-1	0.26651
C6_01370W_A	16.07	395.147	147	0.17	0.00692042	0	1	1446	4	79	0.783541	0.0473009	3	-1		-1	0.266433
C1_00400W_A	97.78	6927.18	0	0.23	0.00174216	-1	-1	1149	3	55	0.563969	0.0551839	0	-1		-1	0.265925
C4_05220C_A	4.53	34.2567	232	0.16	0.00500835	0	1	2397	4	64	0.905298	0.0164032	7	-1		-1	0.265576
C2_04760W_A	23.61	953.124	245	0.14	0.00411215	-1	-1	2676	3	12	0.964873	0.0181551	0		-1	-1	0.2655
C3_04940W_A	24.61	4555.12	22	0.15	0.00190658	0	1	1050	3	95	0.440952	0.0142778	13	-1		-1	0.265022
C1_09840C_A	42.23	4834.02	53	0.19	0.00305188	0	1	984	10	441	0.732724	0.14894	2	-1		-1	0.264574
C3_00450C_A	156.36	53813.1	66	0.24	0.000904159	-1	-1	1107	1	1	0.936766	0.00911895	9			-1	0.263783
C2_00300C_A	79.72	54795.9	91	0.15	0.00340522	-1	-1	882	2	6	0.937642	0.0347113	8		-1	-1	0.263758
C1_12600C_A	28.67	2482.44	167	0.21	0.00260146	0	1	1923	25	1409	0.843474	0.201128	5		-1	-1	0.263647
C7_03920C_A	1354.34	1.71989e+06	48	0.63	0.0153374	-1	-1	327	5	584	0.382263	0.150227	21	-1		-1	0.263611
C4_00970C_A	12.62	726.612	9		0.00357308	0	1	15108	16	152	0.251853	0.0227256	1	-1		-1	0.263489
C3_00100W_A	32.35	6634.5	1	0.17	0.00573066	0	1	699	0	0	1	0	4	-1		-1	0.26296
C5_05370C_A	12.53	2291.76	0	0.13	0.00434783	0	1	2991	5	208	0.761284	0.0161138	4	-1		-1	0.262568
C2_08210C_A	0	25341.6	0	0.48	0.015625	0	0	129	1	179	0.930233	0.0929978	2			-1	0.2625
C3_06370C_A	79.73	16927.8	257	0.14	0	0	1									-1	0.262352
C1_12210W_A	41.52	2836.91	40	0.19	0.00320102	-1	-1	1563	15	1657	0.198976	0.151916	18	1		-1	0.262124
CR_07760W_A	78.92	7696.15	156	0.19	0	-1	-1	276	2	102	0.65942	0.0698434	19			-1	0.261604
C2_04320W_A	6.46	12172.4	141		0.00898372	0	0	1782	4	193	0.538159	0.0305815	9			-1	0.261531
C1_10630C_A	5.35	43.2072	101	0.16	0.00219619	0	0	2733	6	162	0.5397	0.0562561	1			-1	0.261335
C3_04590W_A	187.62	253211	42	0.37	0.00189155	0	1	1587	53	2596	0.121345	0.189862	18			-1	0.261257
C4_02890C_A	641.75	347878	55	0.3	0.0101523	-1	-1	198	4	183	0.742424	0.236196	15			-1	0.26125
C2_05920C_A	883.76	988698	64	0.45	0	-1	-1	282	1	30	0.549645	0.0686406	7			-1	0.260694
C2_03070C_A	11.35	666.358	97	0.15	0.00467914	0	1	1497	1	1	0.614562	0.0154364	10		-1	-1	0.260079
C4_03330W_A	18.21	3065.09	184	0.23	0.000921659	-1	-1	1086	3	7	0.356354	0.0410369	4		-1	-1	0.26
C1_02900C_A	14	222.886	53	0.12	0.00275609	0	1	2178	10	654	0.565657	0.0808669	2		-1	-1	0.259583
C1_00610W_A	74.42	6405.32	8	0.17	0.000564334	-1	-1	1773	1	3	0.996052	0.0106503	0	-1		-1	0.259433
C1_05060W_A	45.16	12163.6	239	0.23	0.00524017	-1	-1	1149	6	370	0.4604	0.0572132	0	-1		-1	0.25803
C6_03080C_A	148.89	13498.1	22	0.41	0.00479386	-1	-1	1044	0	0	1	0	2			-1	0.257669
C5_05130C_A	28.09	2410.18	1	0.17	0.00275862	0	1	726	0	0	1	0	3	-1		-1	0.25747
CR_04720C_A	21.32	1106.49	53	0.19	0.00480423	0	1	4164	10	232	0.198847	0.049288	3	-1		-1	0.256634
C2_00820W_A	17.97	2906.22	44	0.14	0.00200133	-1	-1	1500	4	4	0.396667	0.0679104	1			-1	0.256111
C4_00020W_A	158.66	173968	1	0.28	0.000956023	-1	-1	1047	1	1	0.930277	0.0204498	5			-1	0.254722
CR_06940W_A	4.53	49.3651	252	0.17	0.00783545	0	1	2043	11	113	0.351444	0.0620474	24		-1	-1	0.254591
C3_07170C_A	26.41	662.498	55	0.2	0.00298211	0	1	2013	14	218	0.481868	0.0793275	1	-1		-1	0.254096
C1_14410W_A	427.5	1.06993e+06	0	0.16	0	0	1	234	4	60	0.623932	0.438157	0	-1		-1	0.253673
CR_01370C_A	83.07	12407.7	308	0.22	0.0051975	-1	-1	963	4	393	0.939772	0.10657	0		-1	-1	0.253391
C4_01720C_A	215.01	30498.8	16	0.23	0.00864304	-1	-1	1158	5	69	0.29361	0.0736238	0		-1	-1	0.252841
C5_02020C_A	49.04	5550.22	1	0.12	0.00567108	0	1	1059	18	3288	0.468366	0.129655	0	-1		-1	0.252559
C2_07500C_A	23.22	884.414	42	0.17	0.00514933	0	1	972	5	118	0.345679	0.0573433	1	-1		-1	0.252164
C6_01170W_A	40.33	3385.15	398	0.21	0.00364631	-1	-1	1098	1	1	0.699454	0.0145076	0	-1		-1	0.251785
C7_01160C_A	194.24	911123	99	0.26	0.00719425	0	0	279	4	168	0.430108	0.137532	40			-1	0.251702
CR_08120C_A	69.22	5078.51	6	0.15	0	0	1	2724	57	5704	0.219163	0.147029	0	-1		-1	0.251683
CR_08660W_A	21.61	658.082	10	0.16	0.00165517	-1	-1	7251	13	446	0.266308	0.0155132	0			-1	0.251625
CR_02590C_A	5.52	68.151	10		0.00249066	0	1	3213	4	122	0.502957	0.0327721	5	-1		-1	0.251592
C4_07090C_A	78.36	41410	5	0.13	0.00991885	-1	-1	1110	30	2838	0.166667	0.25603	6	1		-1	0.251196
C2_10100W_A	5.97	79.593	69	0.14	0.004111	0	1	1947	8	240	0.840267	0.0396323	9	-1		-1	0.25089
CR_04560C_A	35.19	1640.02	47	0.19	0.00536673	-1	-1	1119	2	39	0.841823	0.034813	0			-1	0.250491
CR_08460W_A	603.34	355653	5	0.58	0.00458716	-1	-1	873	3	191	0.537037	0.0742486	0			-1	0.25045
C2_02810C_A	79.49	5370.22	5	0.15	0	0	1	450	2	38	0.548889	0.0940444	0	-1		-1	0.250428
C4_04830W_A	30.85	2780.78	8	0.15	0.00326976	0	1	1836	13	753	0.448257	0.0771628	10	-1		-1	0.250099
C1_08810C_A	45.59	7950.76	345	0.18	0.00348953	-1	-1	2007	2	6	0.690085	0.00935838	8		-1	-1	0.249907
C3_03800W_A	238.33	182802	0	0.28	0.000578035	-1	-1	1731	172	24619	0.0519931	0.464897	25			-1	0.249843
C2_03380W_A				0.18	0.00476985	0	1	4191	30	2678	0.166786	0.0901104	0	-1		-1	0.249659
C5_05290C_A	206.04	144919	41	0.27	0	-1	-1	348	2	2	0.436782	0.0526185	3	-1		-1	0.249497
C2_03080W_A	540.98	467374	24	0.6	0.00270514	-1	-1	1110	2	38	0.728829	0.0442804	1			-1	0.248932
C1_13360C_A	3.62	290.37	227	0.16	0.00443656	0	1	1128	6	237	0.431738	0.13483	0		-1	-1	0.248187
C4_01150W_A	12.31	293.277	36	0.14	0.00504484	0	0	1785	6	116	0.704762	0.0897499	0		-1	-1	0.248158
C1_05560W_A	137.3	34241.3	0	0.32	0.00995733	-1	-1	704	2	39	0.914654	0.0336491	21	-1		-1	0.248131
C2_04150C_A	99.92	25266.8	5	0.26	0.00280899	-1	-1	357	1	15	0.761905	0.0459037	2			-1	0.247645
CR_03400W_A	17.55	1244.75	152	0.16	0.00205409	-1	-1	2922	3	114	0.789185	0.0198231	0			-1	0.247412
C2_04240C_A	28.55	1611.75	3	0.17	0.00691017	0	1	1014	2	3	0.445759	0.0299617	1	-1		-1	0.247024
C1_08080C_A	269.74	279674	74	0.22	0	0	0	387	3	159	0.516796	0.0721081	11			-1	0.24645
C2_05540C_A	28.15	3489.41	123	0.15	0.00357462	0	1	1120	4	45	0.495211	0.0654842	2		-1	-1	0.246402
C4_04890C_A	2139.28	3.03025e+06	117	0.64	0	-1	-1	468	5	591	0.350427	0.120681	0			-1	0.245706
C1_03080C_A	19.87	944.869	12	0.12	0.00147059	0	1	681	3	34	0.537313	0.113012	0	-1		-1	0.245693
C7_00800C_A	24.81	7435.94	1	0.16	0.00922509	0	1	543	2	25	0.622468	0.0360295	1	-1		-1	0.245273
C1_11680C_A	18.72	2660.73	0	0.15	0	0	0	222	2	2	0.400901	0.193342	0			-1	0.244515
CR_01650W_A	96.19	30512	201	0.26	0.00609756	-1	-1	657	8	921	0.368341	0.285756	6	1		-1	0.244406
C1_08050W_A	228.29	41695	57	0.21	0	0	0	501	3	128	0.443114	0.0665494	4			-1	0.244286
C3_00310C_A	45.35	13623.7	0	0.17	0.00257069	-1	-1	390	1	118	0.964103	0.0393537	13		-1	-1	0.243635
C7_00380W_A	40.31	2626.41	0	0.12	0.00855746	-1	-1	819	1	1	0.510379	0.010208	7			-1	0.243397
C5_00340W_A	44.12	1765.27	30	0.14	0.0122825	0	0	978	2	174	0.665644	0.0314135	0	-1		-1	0.242947
CR_04910W_A	6.67	126.652	55	0.14	0.00433276	0	1	1155	2	16	0.651082	0.029044	2	-1		-1	0.242077
C1_00810W_A	5.7	88.1023	23	0.15	0.00567537	0	1	882	2	106	0.969388	0.0621061	1	-1		-1	0.242054
C6_01280W_A	12.95	771.823	397	0.14	0.000842105	0	1	2376	18	389	0.287879	0.0724206	2	-1		-1	0.241961
C2_04550C_A	177.26	29467.6	59	0.29	0.00203804	0	0	1473	5	256	0.864223	0.112402	2			-1	0.241944
CR_02200C_A	71.54	17968.3	0	0.25	0.00368664	-1	-1	1086	1	95	0.588398	0.0323318	5			-1	0.241732
C4_05540W_A	48.39	5934.31	6	0.25	0.00489596	-1	-1	1635	41	3694	0.12844	0.229808	9	1		-1	0.241719
C7_03940C_A	32.11	1576.32	22	0.16	0.00273973	-1	-1	1461	6	179	0.503765	0.0406363	0		-1	-1	0.24148
C4_05210W_A	28.8	3722.84	30	0.14	0	0	1	693	4	7	0.4329	0.0428381	1	-1		-1	0.241453
CR_02420W_A	38.68	2938.62	172	0.17	0.00618047	0	1	810	3	12	0.501235	0.0973357	0	-1		-1	0.241181
C7_01300C_A	13.85	772.472	19	0.19	0.0028169	0	1	711	0	0	1	0	3	-1		-1	0.240984
C2_07190C_A	159.12	30384.7	251	0.33	0.00763359	0	1	525	4	25	0.500952	0.105428	0	-1		-1	0.240427
C1_13110C_A	53.01	3122.97	2	0.25	0.00357045	0	1	3642	18	915	0.22872	0.17239	0	-1		-1	0.240254
C2_08190W_A	40.86	5935.85	252	0.2	0.000857633	-1	-1	1167	1	1	0.562982	0.0114962	0	-1		-1	0.240227
C1_05030C_A	19.69	8641.67	0	0.12	0.0100719	0	1	696	2	14	0.944444	0.0450254	9	-1		-1	0.24022
C7_01760C_A	150.16	164196	1	0.27	0	1	0	564	6	137	0.530142	0.0896952	0		-1	-1	0.240023
C1_11910W_A	5.38	46.1695	207	0.14	0.00160385	-1	-1	1248	5	133	0.942308	0.0713586	0		-1	-1	0.24
CR_01590C_A	82.12	6013.94	73	0.24	0.0030525	-1	-1	1639	16	1276	0.226896	0.226477	8	1		-1	0.239755
C1_00600W_A	11.11	439.271	20	0.14	0.00238767	0	1	4608	8	17	0.384332	0.0292647	2	-1		-1	0.239544
CR_06980W_A	8.16	994.848	26	0.15	0.0112108	0	1	447	1	80	0.997763	0.0242643	3	-1		-1	0.239134
CR_10690W_A	26.96	54770.2	219	0.12	0	0	1	747	17	839	0.827309	0.481024	0	-1		-1	0.239048
CR_03340C_A	15.69	1429.83	0	0.11	0.00657895	0	1	1065	4	640	0.646948	0.0691005	2	-1		-1	0.238784
CR_10630W_A	8.63	139.956	2	0.17	0	-1	-1	942	1	61	0.993631	0.0208209	1			-1	0.238327
C1_08880W_A	21.52	696.894	0	0.14	0.0031348	-1	-1	1596	2	2	0.565163	0.0145677	1			-1	0.238216
C1_01820C_A	21.3	466.936	22	0.13	0.00505476	0	1	1188	2	60	0.621212	0.0245614	0	-1		-1	0.237735
C2_10340W_A	19.15	7708.61	15	0.13	0.00368098	0	1	816	3	41	0.584559	0.0533	8			-1	0.23716
C1_07000W_A	17.71	1496.03	259	0.15	0.000438789	-1	-1	2280	9	536	0.867982	0.0338333	0			-1	0.236458
C5_02730C_A	47.32	1765.78	3	0.19	0.00260643	0	1	1152	0	0	1	0	12	-1		-1	0.235696
CR_02610C_A	58.89	2251.4	37	0.14	0.00115607	0	1	1731	5	25	0.415367	0.0838099	4	-1		-1	0.235592
CR_10650W_A	45.15	10187.2	271	0.21	0	-1	-1	1152	4	6	0.373264	0.0755762	7	-1	-1	-1	0.235
C4_06580W_A	64.01	11588.2	1	0.29	0.00386847	-1	-1	1035	0	0	1	0	1	-1		-1	0.233956
C2_04930C_A	23.22	4034.57	0	0.14	0.000894055	0	1	2238	22	2309	0.46202	0.218236	0	-1	-1	-1	0.233424
C4_01240C_A	21.19	6698.26	0	0.14	0	0	0	603	4	588	0.935323	0.126631	0			-1	0.232586
C2_06190W_A	73.97	22987.3	4	0.18	0.00117027	-1	-1	1710	30	2804	0.206433	0.246389	1	1		-1	0.232524
C1_05680C_A	272.27	40222.5	0	0.31	0.0116009	-1	-1	432	1	18	0.953704	0.0200146	3		-1	-1	0.232222
CR_00440C_A	28.28	903.589	52	0.15	0.00408534	-1	-1	4407	6	279	0.556841	0.0324368	0		-1	-1	0.23198
C2_00610C_A	638.77	2.26516e+06	43	0.43	0.00443459	-1	-1	452	3	307	0.820513	0.273018	1			-1	0.231813
C7_01610W_A	117.5	13292	18	0.23	0	-1	-1	338	3	285	0.546816	0.070988	24			-1	0.231776
C5_00700C_A				0.25	0.00174216	-1	-1	1146	2	55	0.95986	0.0284431	0	-1		-1	0.231511
C1_12850W_A	10.14	1.52764e+06	3	0.28	0	0	0	234	1	38	0.700855	0.0913915	5			-1	0.231399
C3_05210C_A	7.33	268.115	25	0.18	0.00240288	-1	-1	12486	13	899	0.397886	0.00627907	16		-1	-1	0.231394
C7_00040C_A	37.51	34460.3	4	0.07	0	0	0	675	5	90	0.718519	0.0935764	2			-1	0.231271
C4_04260C_A	34.36	2472.3	52	0.19	0.00457317	-1	-1	2625	11	187	0.354286	0.0379765	0	-1		-1	0.231133
C4_01410W_A	26.98	4133.31	58	0.14	0.00737619	-1	-1	1899	4	250	0.355977	0.033308	0			-1	0.23071
C3_06360C_A	430.47	177507	1	0.22	0	-1	-1	608	44	6385	0.177632	0.504607	48			-1	0.230453
C2_04530W_A	9.04	154.446	139	0.15	0.00417246	0	1	720	5	199	0.602778	0.199558	0	-1		-1	0.230437
C4_06090C_A	14.22	1421.31	3	0.12	0.00291424	0	1	2403	21	828	0.304619	0.0812967	2			-1	0.230066
C6_04030W_A	29.8	1731.82	62		0.00373972	0	1	1332	2	2	0.578829	0.0144152	15	-1		-1	0.230011
C2_01200C_A	46.56	6151.37	14	0.17	0.00395387	-1	-1	3036	5	344	0.619236	0.0393198	1		1	-1	0.22999
C1_05510C_A	37.79	949309	1	0.32	0.00403226	1	0	249	3	279	0.48996	0.124419	4			-1	0.229687
C1_12810W_A	24.27	1814.88	51	0.17	0.00437637	0	1	915	4	29	0.417486	0.0953585	0	-1		-1	0.229649
C4_03440C_A	27.38	3023.97	339		0.00724966	-1	-1	2208	5	237	0.946105	0.0319918	2		-1	-1	0.229497
CR_10430C_A	8.61	1069.6	14	0.15	0	0	1	579	5	48	0.481865	0.138169	6	-1		-1	0.228369
C5_04990W_A	20.04	1427.24	84	0.16	0.0101833	0	1	492	0	0	1	0	7	-1		-1	0.227636
C6_01140C_A	15.02	1380.96	111	0.15	0.00547445	-1	-1	549	1	1	0.939891	0.0335977	0	-1		-1	0.227344
C1_06970C_A	26.87	45425.6	18	0.15	0.00181269	0	0	1656	13	353	0.396739	0.0555458	4			-1	0.226918
CR_00480W_A	45.3	4419.33	254	0.18	0.0042796	-1	-1	702	2	441	0.703704	0.0706258	0	-1		-1	0.226642
CR_03010C_A	34.74	7772.72	6	0.15	0	0	1	608	1	5	0.557377	0.0402342	5	-1		-1	0.226112
C7_01820C_A	117.03	19744.6	10	0.16	0.00203666	-1	-1	492	1	3	0.689024	0.0168502	0	-1		-1	0.225501
C1_01330C_A	102.82	11267.5	15	0.26	0	0	1	480	2	7	0.604167	0.0901818	2	-1		-1	0.225359
C4_01910W_A	10.95	2658.94	1	0.15	0.00725115	0	1	1518	4	176	0.908432	0.0459991	7	-1		-1	0.225065
C4_07080C_A	8.84	488.648	4	0.18	0.000962773	0	0	3117	7	7	0.210459	0.0193544	0	-1		-1	0.224605
C7_02910W_A	179.28	123636	3	0.24	0.00102916	0	0	2916	81	7094	0.123114	0.231941	0			-1	0.223441
C1_08030W_A	500.65	147388	11	0.4	0	0	1	381	14	548	0.28084	0.427045	3	-1		-1	0.223133
C2_10120W_A	19.44	1050.02	19	0.2	0.00501882	0	1	798	8	299	0.686717	0.104917	0	-1		-1	0.222852
C5_02480W_A				0.16	0.00918367	0	1	981	15	831	0.379205	0.151323	4	-1		-1	0.222675
C4_02100C_A	15.23	465.659	0	0.13	0.00501672	0	1	1197	1	73	0.960735	0.0103394	4	-1		-1	0.222566
CR_07320C_A	82.02	7530.52	248	0.2	0.00107643	-1	-1	930	3	76	0.773118	0.0282547	1			-1	0.222511
C1_07260C_A	13.2	2764.01	14	0.15	0.00334076	0	1	1797	30	3257	0.710629	0.171418	11	-1		-1	0.222143
C1_11650W_A	1254.39	644480	131	0.64	0.00211416	-1	-1	474	4	85	0.675105	0.173818	8	-1		-1	0.221906
C4_07170C_A	26.35	6267.35	0	0.06	0.00413223	0	0	243	2	7	0.45679	0.0973867	26			-1	0.221538
C1_02330C_A	1198.56	4.01071e+06	121	0.46	0.00353357	-1	-1	847	3	141	0.950521	0.16646	4			-1	0.221528
CR_04040C_A	17.33	5977.97	25	0.11	0.000736377	0	1	1359	2	3	0.557763	0.0321684	5	-1		-1	0.220783
C6_03400C_A	394.9	193630	46	0.26	0	-1	-1	384	1	55	0.713542	0.0343894	6	-1	-1	-1	0.220497
C1_04520C_A	90.18	6922.43	2	0.19	0.00557103	-1	-1	1078	4	83	0.467467	0.0572249	1		-1	-1	0.220471
C4_00070C_A	56.36	19562.8	2	0.1	0.00210261	0	1	2379	21	1389	0.137032	0.249354	8			-1	0.220348
CR_01740W_A	243.97	159913	74	0.22	0	0	0	420	2	289	0.995238	0.0898668	6		-1	-1	0.219843
CR_00810W_A	28.63	1861.39	59	0.11	0.00253165	0	0	396	2	108	0.689394	0.118674	1		-1	-1	0.219806
C4_06270C_A	67.61	2766.13	0	0.18	0.00285171	0	1	1053	6	85	0.254511	0.062481	18	-1	-1	-1	0.219443
CR_08470W_A	17.31	833.93	3	0.09	0.00572656	-1	-1	1398	3	28	0.939199	0.0275615	1		-1	-1	0.219333
CR_04310C_A	43.61	46673.1	6	0.14	0.00340715	-1	-1	588	4	718	0.792517	0.123864	0			-1	0.218583
C2_01070W_A	94.29	14281	244	0.27	0.00254022	-1	-1	1182	4	42	0.437394	0.0852642	1			-1	0.218449
C2_04860W_A	12.94	184200	281	0.18	0.00161551	0	1	1239	12	1017	0.42615	0.183689	3	-1		-1	0.217344
C7_01880C_A	4.21	2105.56	140	0.12	0	-1	-1	951	4	96	0.690852	0.0350143	1			-1	0.217333
C3_01390C_A	18.34	410.61	96	0.19	0.00118238	-1	-1	3384	3	4	0.498522	0.0114643	0			-1	0.217105
C2_01260W_A	12.78	788.596	1	0.15	0.00519603	0	0	2118	4	49	0.73796	0.0415997	2		-1	-1	0.216853
C7_04010W_A	37.31	6290.97	1	0.14	0.00156576	-1	-1	1917	6	47	0.348461	0.0289012	5		-1	-1	0.216507
CR_00990W_A	40.55	3385.68	8	0.15	0	0	1	501	3	7	0.487026	0.14491	0	-1		-1	0.215897
C2_01500W_A	16.2	15062.6	0	0.13	0.00230415	0	0	435	6	345	0.866667	0.187389	0			-1	0.215411
C1_13380W_A	6.73	298.279	143	0.15	0.00118343	-1	-1	846	1	1	0.716312	0.0288817	0			-1	0.214406
C5_01320W_A	73.93	48882.2	66	0.21	0.00269397	-1	-1	1857	4	90	0.553043	0.0223363	3	-1		-1	0.214358
CR_03430W_A	50.42	9696.27	38	0.14	0.00566572	-1	-1	354	2	116	0.909605	0.143937	0		-1	-1	0.214152
C3_06520C_A	7.48	644.869	30	0.13	0.00323974	0	1	927	3	16	0.735707	0.0352113	2	-1		-1	0.213876
C1_00330C_A	96.38	180094	5	0.17	0.00182482	0	1	549	6	217	0.417122	0.321594	18	-1		-1	0.213752
C1_01450W_A	47.23	8561.63	1	0.25	0.00470588	-1	-1	1701	4	191	0.553204	0.0677308	1			-1	0.213728
CR_08360C_A	1596.2	2.84105e+06	99	0.64	0.00298063	-1	-1	672	7	766	0.382263	0.174556	30			-1	0.213242
C4_03390W_A	145.12	24864.5	0	0.26	0.0028169	0	1	711	9	273	0.308017	0.165946	15	-1		-1	0.213133
C2_00210W_A	2659.19	5.4808e+06	175	0.57	0.00423729	-1	-1	237	5	120	0.540084	0.388452	8			-1	0.212809
C2_07590W_A	181.52	97564.1	10	0.37	0.00293255	-1	-1	342	2	111	0.581871	0.0591407	0	-1		-1	0.21202
C1_08920W_A	38.45	2011.75	360	0.22	0.00676437	-1	-1	888	4	181	0.386261	0.0645597	9			-1	0.212
C1_07880C_A	32.87	5209.74	8		0.00258844	-1	-1	2319	5	91	0.578698	0.0241343	1			-1	0.211989
CR_10190C_A	7.96	109.85	61	0.16	0.000753012	0	0	1329	2	9	0.946576	0.0354985	4			-1	0.210677
C2_01510C_A	15.81	8942.55	154	0.14	0.00738916	0	1	813	4	47	0.445264	0.0699515	8	-1		-1	0.208753
C4_06000W_A	13.68	3028.24	21	0.15	0.00583942	0	1	1371	6	210	0.357403	0.036344	4	-1		-1	0.208647
CR_01440C_A	442.43	4.43341e+06	0		0.0106383	0	0	189	2	147	0.486772	0.27481	2			-1	0.208577
C7_03210W_A	11.23	515.52	162	0.17	0.00691443	0	0	1158	4	18	0.541451	0.034193	2		-1	-1	0.206707
C3_02440C_A	10.2	284.071	133	0.16	0.00656455	0	1	915	3	97	0.862295	0.0406422	1	-1		-1	0.206661
C6_01000C_A	17.82	3054.26	307	0.13	0.0272	-1	-1	1251	1	1	0.972022	0.0166206	0		-1	-1	0.206389
C4_05450C_A	123.1	18445.4	57	0.34	0.00339367	-1	-1	885	10	180	0.706215	0.115346	0			-1	0.206187
C1_07460C_A	26.2	2849.02	81	0.21	0.00347524	0	1	1152	19	1631	0.847222	0.120956	8	-1		-1	0.205891
C4_00780C_A	19.15	412.524	245	0.18	0.00186451	0	1	3219	32	1122	0.179248	0.154062	1		-1	-1	0.205341
CR_01960C_A	9.96	572.15	39	0.12	0.00284495	-1	-1	1407	1	43	0.61194	0.0211705	0			-1	0.205163
C1_11030W_A	409.48	130473	244	0.59	0.000893655	0	0	1120	3	200	0.448276	0.0809033	6	-1		-1	0.205069
C7_03180C_A	261.35	100058	13	0.46	0.0106635	-1	-1	845	11	593	0.35175	0.19271	0			-1	0.204827
C6_02160W_A	6.01	776.749	49	0.15	0.00179641	0	0	1671	5	102	0.891083	0.0408608	3		-1	-1	0.204562
CR_06160C_A	15.98	1342.35	5	0.1	0.00240385	-1	-1	417	2	41	0.889688	0.097142	0		-1	-1	0.204556
C7_04170W_A	5.2	599.109	0	0.13	0.00610501	0	0	820	4	147	0.984375	0.0570458	21			-1	0.204545
C6_02330W_A	446.13	671418	9	0.5	0.0125	0	0	561	9	682	0.370766	0.321005	2			-1	0.20441
C6_01380C_A	19.95	546.832	6		0.00488599	-1	-1	615	2	2	0.547967	0.0551707	1			-1	0.204403
C2_04990W_A	12.17	4719.01	26	0.17	0.0060024	0	1	834	1	2	0.86211	0.0246343	1	-1		-1	0.204342
C5_04600C_A	46.56	10989	9	0.18	0.00469684	-1	-1	2343	8	694	0.379428	0.0467847	9		-1	-1	0.203286
C1_08020W_A	31.78	4400.85	52	0.15	0.00106724	0	1	1875	23	1733	0.3056	0.148881	3	-1		-1	0.202853
C3_01160W_A	27.74	1949.24	132	0.15	0.00649351	0	1	2157	12	350	0.325452	0.0981436	6			-1	0.202542
C1_03280W_A	143.75	38931	144	0.19	0.00107296	-1	-1	933	0	0	1	0	2	-1		-1	0.202472
C4_01670C_A	12.25	378.735	67	0.19	0.0101609	0	1	1182	2	318	0.983926	0.036576	4	-1		-1	0.202212
C2_07560W_A	18.41	2210.38	3	0.15	0.00365482	-1	-1	4926	8	107	0.382257	0.0179533	0	-1		-1	0.20208
C1_04240C_A	1182.91	1.21668e+06	10	0.56	0.00315457	1	0	318	5	970	0.402516	0.26429	0			-1	0.20164
C3_01770C_A	9.72	246.922	3	0.17	0.00587921	0	1	1872	4	16	0.434295	0.025426	4			-1	0.201336
C3_07270C_A	1845.1	5.54371e+06	7		0.0101597	-1	-1	690	10	692	0.32029	0.177073	5			-1	0.200706
C5_05040W_A	18.56	1503.18	23	0.14	0.00276243	0	1	1449	4	44	0.561767	0.0444049	16	-1		-1	0.200573
C6_01960W_A	12.07	404.714	8	0.14	0.000593472	0	0	1686	1	1	0.590747	0.0083972	3		-1	-1	0.200558
C3_04680W_A	2546.49	5.85132e+06	76	0.68	0	-1	-1	336	17	2253	0.529762	0.13819	0			-1	0.200452
C3_00530C_A	17.01	1980.79	107	0.14	0.000684932	-1	-1	1461	1	1	0.610541	0.00698904	0			-1	0.200324
C7_03710C_A	5	242.01	290	0.15	0.00393701	-1	-1	3303	3	3	0.379655	0.00914602	0			-1	0.2
C1_13940W_A	455.85	3.04273e+06	30	0.53	0.00268336	-1	-1	1119	2	83	0.753351	0.0371723	4			-1	0.199909
C5_02650C_A	29.71	4156.89	8	0.19	0.00602183	0	0	2658	17	1137	0.25696	0.0524522	0	-1		-1	0.199865
C1_07190W_A	28	14010.4	22	0.12	0.00162272	0	1	2466	29	2210	0.237632	0.0974705	0	-1		-1	0.199785
C1_00890W_A	12.2	357.506	210	0.13	0.0027907	-1	-1	2151	7	76	0.32357	0.0684189	0		-1	-1	0.199412
CR_09720W_A	4.68	38.6376	0	0.15	0.00530035	-1	-1	567	0	0	1	0	6			-1	0.198784
C3_03930W_A	39.66	9969.42	0	0.13	0	0	1	1032	60	8616	0.385659	0.276492	0	-1		-1	0.19798
C1_04440W_A	0	786.175	0	0.12	0	0	0	369	4	176	0.859079	0.151318	0			-1	0.197554
C7_02550C_A	36.19	1349.91	4	0.17	0.00598802	0	1	669	2	182	0.977578	0.0209897	7	-1		-1	0.196825
C1_01830C_A	63.82	19446.4	167	0.17	0	-1	-1	573	3	392	0.60733	0.0778387	1			-1	0.196657
C1_04370C_A	106.77	17359.2	213	0.16	0.00166113	-1	-1	603	3	336	0.524046	0.0901774	3			-1	0.196386
CR_04180C_A	41.59	3727.96	4	0.16	0.000858369	-1	-1	2331	5	351	0.77692	0.0408068	3			-1	0.19624
CR_10530W_A	16.89	730.102	0	0.15	0.00470747	0	0	1488	2	2	0.47043	0.0282146	2			-1	0.196046
C3_07320W_A	15.35	933.431	15	0.13	0.000481812	-1	-1	4152	11	235	0.412091	0.0244277	1			-1	0.195875
C1_07830C_A	9.76	1366.87	28	0.11	0.00767263	0	1	783	2	2	0.412516	0.0219311	1	-1		-1	0.195695
C6_02680W_A	11.71	362.971	239	0.15	0.00593824	0	1	843	2	17	0.661922	0.0483605	4		-1	-1	0.195668
C1_11240C_A	71.17	23210.3	69	0.19	0.00487211	-1	-1	822	0	0	1	0	3	-1		-1	0.195532
C3_06380W_A	53	11429.2	247	0.19	0	0	1									-1	0.195315
C3_01070C_A	3.47	50.1397	210	0.15	0.000668896	-1	-1	2991	4	24	0.396523	0.0195496	0	-1		-1	0.195
C1_12690C_A	4.04	63.6466	156	0.13	0.00153846	0	0	651	2	61	0.486943	0.049601	7		-1	-1	0.19493
C6_00550W_A	80.42	5131.83	247	0.25	0.00331492	-1	-1	906	6	493	0.93819	0.100058	5		1	-1	0.194792
C1_10470W_A	103.44	34208.4	243	0.19	0.0039604	-1	-1	1011	4	1012	0.6182	0.0666571	5	-1		-1	0.194627
C5_02380W_A	211.47	230911	9	0.29	0.00278862	0	0	1794	65	6153	0.0819398	0.291708	2			-1	0.194334
C1_06180W_A	296.3	47903.4	0		0.0100503	0	0									-1	0.193634
C1_10910C_A	21.34	440.4	1	0.16	0.00137268	-1	-1	1458	3	51	0.561728	0.043807	1		-1	-1	0.193564
C1_07490C_A	10.88	179.125	31	0.19	0.00250752	0	1	1995	4	162	0.614536	0.0125156	7	-1		-1	0.193459
C3_01400W_A	22.24	615.695	373	0.19	0.0042123	-1	-1	1188	4	252	0.792088	0.0445603	0			-1	0.193412
C3_03420C_A	279.82	126442	0	0.36	0.000580046	-1	-1	1725	69	7503	0.104348	0.274732	14	-1		-1	0.193176
C2_04800C_A	11.92	240.181	54	0.12	0.00140746	-1	-1	1422	1	1	0.988748	0.0121302	0			-1	0.192941
CR_08500W_A	58.7	4162.02	341	0.15	0.00158479	-1	-1	1263	3	66	0.665875	0.0289686	3		-1	-1	0.192902
C5_01480W_A	26.39	4442.37	302	0.16	0.00934579	-1	-1	429	1	4	0.74359	0.0187521	8		-1	-1	0.192508
C1_00060W_A	274.55	92689.7	15	0.26	0.00910273	-1	-1	1539	3	14	0.550357	0.0716862	6		-1	-1	0.1925
CR_05150W_A	65.83	21125	156	0.23	0.0109091	-1	-1	276	2	142	0.507246	0.142594	6			-1	0.1925
C1_05190C_A	150.85	42666.9	110	0.29	0.00301205	0	0	333	3	5	0.61039	0.269143	5			-1	0.191906
CR_04820W_A				0.25	0.0163934	-1	-1	306	3	173	0.477124	0.224041	5			-1	0.191702
C1_07800W_A	8.07	987.146	187	0.14	0.0033541	-1	-1	2088	3	158	0.816092	0.0127063	1			-1	0.191111
C7_01890C_A	236.09	72243.2	104	0.35	0	-1	-1	198	2	138	0.449495	0.0818481	11			-1	0.190949
C1_09630W_A	797	388606	27	0.56	0.00456969	-1	-1	1314	1	44	0.984475	0.0147749	3	-1		-1	0.190946
C2_08900W_A	438.04	1.707e+06	38	0.24	0	0	0	183	6	65	0.540984	0.32755	28			-1	0.190934
CR_02740W_A	19.73	6803.04	50	0.13	0.00808489	0	1	1980	17	785	0.396465	0.207833	3			-1	0.190755
C5_02780W_A	10.5	1451.74	33	0.16	0.00163666	-1	-1	2445	24	1457	0.68998	0.0684637	0		-1	-1	0.190625
C1_01280C_A	9.86	498.641	33	0.14	0.00288184	0	0	348	2	12	0.948276	0.0978654	2	-1		-1	0.19
C3_02200W_A	5.08	1723.07	0	0.16	0	0	0	177	4	328	0.649718	0.177041	31			-1	0.19
CR_08250C_A	115.18	790788	39	0.29	0.00259355	-1	-1	2700	85	8899	0.0507407	0.269073	0		-1	-1	0.189599
C4_03170W_A	12.74	714.419	133	0.12	0.00392542	0	1	1020	3	75	0.901961	0.0326356	4		-1	-1	0.18938
C2_06790W_A	21.18	8136.01	6	0.16	0.00278552	0	1	360	9	285	0.383333	0.399362	4	-1		-1	0.188933
C3_06880W_A	3.71	133.178	0	0.15	0.00747198	0	0	804	4	37	0.722637	0.0627403	6		-1	-1	0.188886
CR_10040W_A	108.47	10168.5	7	0.11	0	0	0	315	4	1076	0.603175	0.260635	14			-1	0.188809
C6_03730C_A	43.39	3602.05	337	0.23	0.00578871	-1	-1	1383	3	53	0.385394	0.0194315	4	-1		-1	0.188571
C1_13680C_A	364.76	130893	18	0.35	0.00562852	-1	-1	534	3	23	0.762172	0.0962079	1		-1	-1	0.188194
CR_08030C_A	41.35	23139.4	1	0.16	0.00344679	-1	-1	2322	4	28	0.80534	0.0131888	14			-1	0.188183
C1_10860C_A	19.96	4553.22	0	0.19	0	-1	-1	1338	2	314	0.859492	0.0329812	1			-1	0.187661
C3_02260C_A	37.12	2068.42	28	0.14	0.00625	-1	-1	1761	9	426	0.629188	0.049268	11		-1	-1	0.187607
C2_03890W_A	5.71	42.8332	42	0.15	0.00269784	0	0	1113	2	2	0.67655	0.0334609	17		-1	-1	0.187554
C5_01430C_A	17.57	493.041	27	0.15	0.00434153	0	1	1383	9	967	0.930586	0.0545915	11	-1		-1	0.187494
CR_04030W_A	10.13	246.265	25	0.17	0.00558243	-1	-1	2688	5	6	0.473586	0.036708	3			-1	0.186874
C3_01530C_A	11.17	292.552	42	0.15	0.00117758	0	1	8493	53	6533	0.448605	0.0860486	0		-1	-1	0.186167
CR_02580W_A	36.57	1189.59	130	0.18	0.00315789	-1	-1	951	0	0	1	0	6			-1	0.186036
CR_01060W_A	44.78	3259.65	23	0.27	0.000807754	1	0	1239	1	68	0.965295	0.0123632	2	-1		-1	0.185525
C4_02750W_A	11.32	1688.09	23	0.18	0	-1	-1	447	1	92	0.975391	0.0530713	1			-1	0.185459
C6_04170C_A	6.31	168.701	278	0.17	0.00208406	0	1	2880	35	926	0.309722	0.118888	3			-1	0.185341
C1_06230C_A	14.11	21918.6	12	0.18	0.00695931	-1	-1	1872	7	513	0.332799	0.0485124	0		1	-1	0.185149
C1_03620C_A	112.87	235114	46	0.57	0.00693481	0	0	722	3	170	0.844784	0.141439	6			-1	0.18375
C2_00250W_A	596.78	2.22546e+08	44	0.35	0	-1	-1	270	3	76	0.448148	0.163918	0			-1	0.183688
C5_02400W_A	122.62	80603.6	17	0.14	0.0121547	-1	-1	906	78	8514	0.135762	0.700704	16			-1	0.183611
C3_04090W_A	458.49	185129	2	0.45	0.00117924	-1	-1	849	76	6224	0.0718492	0.271478	19			-1	0.183176
C1_03580W_A	0	0.889327	0	0.09	0.0102041	0	0	99	6	760	0.676768	1.13956	1			-1	0.182976
C1_12320C_A	435.24	243773	155	0.41	0	-1	-1	204	3	205	0.529412	0.317104	4			-1	0.182265
C1_11260C_A	0	7459.65	0	0.19	0.0145985	0	0	138	1	44	0.5	0.133933	2			-1	0.182015
C4_00330C_A	649.28	776950	162	0.26	0.00355872	-1	-1	282	3	160	0.64539	0.135391	5			-1	0.181979
CR_03110W_A	15.37	5480.53	175	0.14	0.00850229	-1	-1	1530	3	3	0.369281	0.0284703	0	-1		-1	0.181552
C3_03310C_A	28.49	15926.3	3	0.12	0.00150376	-1	-1	666	3	145	0.453453	0.0322136	14	-1		-1	0.181397
C3_02150C_A	100.52	135157	21	0.38	0.00176991	-1	-1	1131	1	27	0.970822	0.00723029	0	-1		-1	0.181099
C2_07040W_A	23.91	7190.34	78	0.13	0.00643382	0	1	1089	8	338	0.648301	0.10812	5	-1		-1	0.181019
C2_08380C_A	10.46	200.877	0	0.14	0.00931532	0	1	2148	22	1627	0.541434	0.111787	0	-1		-1	0.181
C4_04340C_A	45.33	1416.78	3	0.18	0.00562852	0	1	534	0	0	1	0	6	-1		-1	0.180277
C2_00430C_A	58.29	7845.91	4	0.18	0.00382166	0	1	786	12	277	0.394402	0.20952	12		-1	-1	0.180007
C5_01610W_A	17.37	1177.82	436	0.17	0.00340368	-1	-1	1470	10	356	0.829932	0.0530835	0	-1		-1	0.18
CR_07050C_A	73.59	11127.3	36	0.43	0.00210526	-1	-1	6651	146	12250	0.0413472	0.328653	1			-1	0.179599
C2_01620W_A	907.08	1.17541e+06	45	0.53	0	-1	-1	474	5	113	0.409283	0.208064	1		-1	-1	0.179521
C5_01050C_A	87.32	21738.9	252	0.21	0	-1	-1	607	5	475	0.303867	0.123086	7		-1	-1	0.179312
C4_04520W_A	29.05	4683.65	115	0.17	0.00843373	0	1	831	20	1738	0.369434	0.186382	11	-1		-1	0.178957
C3_04880W_A	179.1	82250.1	15	0.18	0.00116686	-1	-1	858	93	10575	0.0839161	0.410525	35			-1	0.176858
CR_05140W_A	13.02	1929.28	36	0.16	0.00701262	0	1	714	2	318	0.810924	0.0542443	2	-1		-1	0.17652
C2_02160W_A	10.07	162.826	8	0.15	0.00280374	-1	-1	1071	1	1	0.836601	0.0245797	0		-1	-1	0.176435
C5_04640C_A	31.88	788.53	0	0.18	0.0035497	-1	-1	3945	11	267	0.219772	0.0370735	2			-1	0.176303
C1_03290W_A	23.98	2992.54	3	0.13	0.00477961	-1	-1	1884	5	455	0.847134	0.0458816	0	-1		-1	0.175716
C7_00820W_A	21.56	690.508	125	0.17	0.00366636	0	1	1092	1	1	0.970696	0.00848298	4	-1		-1	0.175585
C4_00800W_A	9.56	127.313	39	0.15	0.00627803	0	1	1116	6	164	0.454301	0.0667199	14	-1		-1	0.175557
C1_12280C_A	10	518.483	108	0.2	0	-1	-1	699	1	1	0.86123	0.029141	4			-1	0.175237
CR_06500C_A	6.98	23300	134	0.16	0.004	0	0	501	3	160	0.672655	0.0805379	2			-1	0.175089
C2_05280C_A	6.74	266.626	0	0.11	0.00446429	0	1	897	20	1033	0.701226	0.354	2	-1		-1	0.174596
C2_00850W_A	46.4	5189.37	130	0.17	0.00298507	-1	-1	1341	1	1	0.90604	0.0170044	5			-1	0.174552
C1_12200W_A	11.19	218.885	22	0.18	0.00480274	0	1	2916	3	145	0.500686	0.0151069	2	-1		-1	0.173955
C5_03530C_A	16.64	693.634	202	0.15	0.0110092	-1	-1	546	1	20	0.831502	0.0234175	1			-1	0.173578
CR_06550C_A					0.0146628	0	0	330	5	72	0.39697	0.232889	2			-1	0.173513
C5_02810W_A	15.81	1409.39	0	0.14	0.00982318	0	1	510	20	1964	0.45805	0.401153	15			-1	0.1735
C1_02380C_A	4.32	1039.89	2	0.15	0.0116279	-1	-1	603	0	0	1	0	2		-1	-1	0.173216
C5_03350W_A	401.21	125476	44	0.46	0.00266904	-1	-1	1125	1	30	0.721778	0.0124366	3	-1		-1	0.173098
CR_03380W_A	17.1	575.441	323	0.15	0.00180832	-1	-1	1107	2	2	0.581752	0.0269077	2	-1		-1	0.173056
C1_07560W_A	10.86	9544.2	110	0.13	0.00834202	0	0	960	9	754	0.742708	0.0597275	42			-1	0.173042
C2_06630C_A	14.48	502162	17	0.44	0.00970874	0	0	207	10	210	0.565217	1.13043	0			-1	0.172083
C1_04260W_A	1052.6	2.16711e+06	11	0.68	0	0	0	411	4	199	0.518248	0.155436	2			-1	0.171987
CR_06810W_A	767	805508	7	0.62	0	1	0	411	7	287	0.493917	0.167645	0	-1		-1	0.171987
C1_04720W_A	62.39	21290.6	0	0.19	0	0	0	222	4	389	0.405405	0.262617	0			-1	0.171745
CR_03820C_A	11.55	1152.24	100	0.15	0.0020339	0	1	1476	6	48	0.302168	0.103612	23	-1		-1	0.171527
C2_02100W_A	27.43	872.656	4		0.00236593	-1	-1	5073	11	247	0.249951	0.0515851	3		-1	-1	0.171394
CR_06080W_A	188.13	204770	2	0.19	0.000969932	0	1	1032	16	743	0.168605	0.209637	2	-1		-1	0.171181
C2_02350C_A	15.35	1974.62	86	0.13	0.0051757	-1	-1	3672	4	258	0.499183	0.0213451	0	-1		-1	0.171125
C2_10010C_A	130.61	19441.8	37	0.31	0.0111266	-1	-1	720	18	1010	0.211111	0.263043	18		-1	-1	0.171081
CR_01610C_A	109.88	30163.3	56	0.23	0.00986547	-1	-1	1116	9	641	0.212366	0.173533	5		-1	-1	0.170379
C2_05030C_A	99.29	42083.9	13	0.18	0.00276625	0	1	724	8	1317	0.507109	0.240126	2	-1		-1	0.170013
C4_04110W_A	19.57	61372.3	0	0.17	0.00729927	0	0	138	2	206	0.637681	0.188345	4			-1	0.17
C6_02150C_A	5.46	153.234	195	0.14	0.00587803	-1	-1	1362	0	0	1	0	8	-1		-1	0.17
CR_10520C_A	9.75	954.537	3	0.2	0.0028169	0	1	711	3	9	0.436006	0.0894874	2	-1		-1	0.169721
CR_03950W_A	36.68	1536.76	245	0.21	0.00509554	-1	-1	786	1	76	0.801527	0.0248853	14		-1	-1	0.169437
C1_06590C_A	79.3	54103.1	38	0.23	0.00415973	0	1	1203	18	1196	0.213633	0.125773	23	-1		-1	0.168697
C6_00690W_A	10.72	3850.79	113	0.15	0.00327654	0	0	1527	3	27	0.753766	0.0292472	10			-1	0.168648
C3_04860W_A	59.64	9020.58	2	0.14	0.0052356	-1	-1	1338	15	739	0.257848	0.040922	2	-1		-1	0.168315
C4_06290W_A	26.81	2533.88	0	0.11	0.00675676	-1	-1	297	1	34	0.989899	0.0375312	14			-1	0.167647
C5_05300W_A	98.28	324620	23	0.29	0.00420757	0	1	714	32	3022	0.47479	0.399542	1	-1		-1	0.167391
C4_05180C_A				0.15	0.00494467	0	1	4248	79	4353	0.171139	0.150869	10		-1	-1	0.166921
C1_09820C_A	0.26	330.945	0	0.1	0	0	0	453	4	219	0.373068	0.105632	0			-1	0.166726
CR_00710C_A	9.29	270.838	0	0.09	0	-1	-1	690	1	6	0.985507	0.0342056	5			-1	0.166397
C3_07380W_A	71.67	10602.9	0	0.18	0.00152207	-1	-1	658	12	2211	0.181347	0.156531	29			-1	0.166282
C4_04220W_A	13	396.14	0	0.17	0.00582524	0	0	516	5	587	0.792636	0.098065	0		-1	-1	0.16619
C4_03880W_A				0.17	0.00682128	0	0	1467	10	1334	0.869121	0.0815087	0	-1		-1	0.166175
C3_07020W_A	82.52	20072.2	3	0.25	0.00462677	-1	-1	3243	21	1124	0.184089	0.0749503	0			-1	0.166005
CR_01080W_A	8.67	107.508	81	0.17	0.00153775	-1	-1	6504	17	1558	0.38976	0.0398727	1	-1		-1	0.165875
C3_07640C_A	197.63	468942	37		0.00195823	0	0	1533	57	7529	0.101761	0.162083	31			-1	0.165395
C6_01910W_A	427.55	110174	5	0.53	0.00133511	-1	-1	750	1	21	0.782667	0.0177037	1	-1		-1	0.164798
C5_02000C_A	197.15	262109	102	0.38	0.00190597	-1	-1	1575	61	6008	0.165714	0.294655	2			-1	0.164334
C2_03330C_A	119.69	13049.4	0	0.25	0.00617829	-1	-1	1134	5	311	0.366843	0.060688	3	-1		-1	0.164123
C2_06480W_A	34.62	7159.41	343	0.17	0.00102987	-1	-1	972	1	1	0.811728	0.0167761	6	-1		-1	0.164099
C2_08370C_A	5311.93	1.77009e+07	57		0.000726744	1	0									-1	0.163609
C4_06880C_A	195.01	113943	1	0.26	0.00355872	-1	-1	282	11	1162	0.471631	0.484256	28		-1	-1	0.16345
C1_08010W_A	176.02	85994.1	14	0.3	0.00139082	0	1	720	6	138	0.647222	0.101644	1	-1		-1	0.163257
C2_03790C_A	155.08	523703	245	0.29	0.00290698	0	0	345	8	515	0.298551	0.38341	3			-1	0.163063
CR_09510C_A	67.83	6547.96	181	0.23	0	-1	-1	801	5	260	0.39201	0.171548	2			-1	0.162899
CR_10710C_A	20.45	3411.01	0	0.14	0.000636537	-1	-1	1572	4	24	0.47201	0.0470946	3		-1	-1	0.162874
C6_03130W_A	434.56	222985	55	0.33	0	0	0	192	5	363	0.677083	0.261765	6			-1	0.162809
C2_06530W_A	6.01	452.087	69	0.17	0.00514933	0	1	972	0	0	1	0	4	-1		-1	0.16236
C6_00780W_A	19.11	506.17	88	0.17	0.00331026	0	1	3324	47	3643	0.568893	0.265341	0	-1		-1	0.162309
CR_09640C_A	257.29	72573	82	0.31	0	-1	-1	195	3	244	0.528205	0.380834	10			-1	0.162265
C5_00050W_A	26.31	2333.18	3	0.15	0.00429799	0	0	699	3	183	0.811159	0.0624083	2			-1	0.16221
CR_06800C_A	1268.21	1.67056e+06	8	0.53	0	1	0	318	14	312	0.308176	0.429861	2			-1	0.161988
C4_02630C_A	69.87	7009.65	30	0.22	0.00227273	0	1	441	8	487	0.390023	0.288513	0	-1		-1	0.161437
CR_10450C_A	32.39	4106.35	2	0.16	0.0010142	-1	-1	987	0	0	1	0	11		-1	-1	0.161279
C2_01010W_A	201.66	391306	1		0.0115012	0	0	1653	13	1301	0.451301	0.234351	4			-1	0.161273
C1_04330W_A	62.09	28702.4	7	0.19	0.00745342	-1	-1	1611	6	400	0.743637	0.0818303	3	-1		-1	0.160995
C2_01750C_A	56.14	251222	0	0.18	0.00201207	0	0	498	2	53	0.475904	0.152919	2			-1	0.160762
C1_07120W_A	178.97	204181	2	0.26	0.000548546	0	0	1824	98	14191	0.0910088	0.508829	14			-1	0.160676
C2_02660W_A	19.91	6691.3	4	0.13	0.00527705	0	0	759	1	42	0.761528	0.03046	8			-1	0.160668
CR_02980C_A	66.05	8796.85	283	0.21	0.0155521	-1	-1	1287	27	1665	0.550117	0.472288	4			-1	0.160474
C5_00210C_A	69.04	3524.12	4	0.18	0.00146699	-1	-1	2046	11	485	0.178886	0.07129	3		-1	-1	0.160409
C1_06840C_A	63.56	7699	5	0.2	0	-1	-1	294	9	965	0.683673	0.281808	5			-1	0.160379
C4_04210C_A	13.11	552.785	54	0.19	0.00681818	-1	-1	441	3	25	0.46712	0.0688456	16			-1	0.16
CR_03240C_A	8.55	177.914	150	0.2	0.0108883	-1	-1	1749	3	86	0.748428	0.0471832	6		-1	-1	0.16
C4_01190W_A	26.3	5532.18	36	0.17	0.00243408	-1	-1	2466	6	58	0.249392	0.0544482	1			-1	0.15908
C3_04400C_A	37.23	947.296	74	0.19	0.000430849	0	1	2322	131	7341	0.229543	0.134657	13	-1		-1	0.158889
C1_00650C_A	91.08	20968.6	26	0.21	0	-1	-1	681	4	18	0.618209	0.100919	0			-1	0.158079
C2_05140W_A	9.81	3027.5	97	0.13	0.00384615	0	1	3381	18	1383	0.207335	0.0767815	0	-1		-1	0.15772
C7_01370W_A	5.26	80.6535	244	0.13	0.00828729	0	0	1449	10	187	0.405797	0.0656074	1		-1	-1	0.157571
C2_08320C_A	8.17	1192.25	36	0.12	0.0027027	0	0	612	4	62	0.656863	0.0951131	0			-1	0.156925
CR_01050C_A	16.1	1507.7	198	0.16	0.00497788	0	1	1809	11	1126	0.50691	0.112925	5	-1		-1	0.15681
C1_01970W_A	0	54.893	0	0.1	0	0	0	279	5	1053	0.444444	0.500399	0			-1	0.156726
C4_03400W_A	188.21	2.67676e+06	27	0.24	0.0113852	0	0	527	2	130	0.753968	0.100869	7			-1	0.156674
CR_03570C_A	27.37	10839.3	196	0.15	0.00309917	-1	-1	969	1	1	0.55418	0.0245942	8			-1	0.156099
C5_02760W_A	42.49	4410.67	74	0.15	0.00124533	-1	-1	804	7	285	0.385572	0.0561918	0	-1		-1	0.155503
C6_03110C_A	7.15	781.513	110	0.12	0.00353045	0	1	1134	4	21	0.556437	0.0387745	19		-1	-1	0.15527
CR_02600W_A	3.45	122.693	13	0.13	0	0	0	654	3	13	0.542813	0.124654	5		-1	-1	0.155
C1_01870C_A	175.42	14966.1	259	0.42	0.00134228	-1	-1	1491	18	1800	0.31992	0.201173	10			-1	0.154407
C2_10090C_A	6.02	146.79	319	0.15	0.00338524	-1	-1	2955	3	26	0.414552	0.00940075	18		-1	-1	0.154
CR_04850C_A	3.96	90.8993	172	0.19	0.00128866	0	0	777	4	97	0.36036	0.100829	0			-1	0.15375
C2_04060C_A	7.91	1695.55	54	0.1	0.00605602	0	1	2643	33	4329	0.245176	0.221206	1	-1		-1	0.153632
C1_10320W_A	13.14	376.2	115	0.15	0.00471254	0	1	1065	2	2	0.539906	0.0428237	7	-1		-1	0.153146
C3_05000W_A	216.29	38160.4	10	0.34	0	-1	-1	612	54	7353	0.143791	0.400171	14		-1	-1	0.153108
C1_08380W_A	7923.38	3.29502e+07	64		0.00145349	1	0									-1	0.152984
CR_04440C_A	1.02	177111	0	0.38	0.00895522	0	0	336	3	283	0.508929	0.189097	2		-1	-1	0.152976
C4_05670W_A	114.39	40531.5	37	0.2	0.00145419	-1	-1	2064	14	407	0.273256	0.0706864	10			-1	0.15288
C1_00320W_A	42.11	1921.69	0	0.14	0	-1	-1	786	4	722	0.478372	0.148532	1			-1	0.152687
C5_04890C_A	7.19	83.6041	71	0.14	0.00356824	-1	-1	1122	4	39	0.614082	0.04987	1			-1	0.152661
C6_04250W_A	1087.7	2.82966e+06	22	0.53	0	-1	-1	252	4	97	0.400794	0.118156	13			-1	0.152569
C1_13370W_A	13.4	475.338	340	0.24	0.00501672	-1	-1	1175	4	42	0.531064	0.0831793	1			-1	0.1525
C3_05950W_A	8.38	470.797	15	0.14	0.00611888	0	0	2289	17	1670	0.369594	0.0489868	8		-1	-1	0.15187
C2_09370C_A	8.26	793.785	67	0.13	0.00145419	-1	-1	2064	5	878	0.756783	0.0231567	2			-1	0.151736
C3_03920W_A	127.84	91821.9	14	0.2	0	0	0	216	47	6596	0.203704	1.02794	37			-1	0.151453
C4_00610W_A	22.24	725.403	18	0.13	0.00094697	-1	-1	1057	0	0	1	0	4			-1	0.151397
C1_00980W_A	102.75	26429.7	163	0.15	0.00371747	-1	-1	270	4	264	0.525926	0.286697	14			-1	0.151015
C3_04430W_A	651.1	306667	73	0.47	0.00123457	-1	-1	811	43	2376	0.163551	0.146551	40			-1	0.150657
C7_03470W_A					0.0132939	0	0	678	8	630	0.318584	0.127012	0			-1	0.150498
C4_06680C_A	54.22	3505.04	83	0.22	0.00955882	-1	-1	2721	54	4586	0.168688	0.244132	6			-1	0.150379
CR_08820C_A	5915.46	6.51939e+10	1	0.15	0	-1	-1	270	15	362	0.188889	1.90996	0			-1	0.15001
C1_12260W_A	10.61	2608.54	79	0.18	0.00780031	-1	-1	642	3	9	0.531153	0.0899472	18		-1	-1	0.15
C4_04100C_A	32.33	5724.74	314	0.19	0.00337268	-1	-1	594	13	907	0.262626	0.278507	33		-1	-1	0.15
C1_05390C_A	26.73	658.157	94	0.17	0.00486855	0	0	2055	11	1112	0.730414	0.0418087	7		-1	-1	0.149893
C1_09940W_A	17.62	4934.38	0	0.11	0.00352113	0	0	285	4	266	0.378947	0.229365	1			-1	0.149476
C2_02770W_A	67.72	159440	6	0.16	0.0013934	-1	-1	2154	8	442	0.365831	0.0700212	8			-1	0.149287
C1_04190C_A	24.07	1266.33	126	0.11	0.000853242	-1	-1	1173	3	6	0.629156	0.0466057	5		-1	-1	0.149236
C1_14190C_A	12.04	750460	51	0.15	0.00534759	0	1	375	7	839	0.328	0.342186	3	-1		-1	0.1476
C1_00340W_A	111.49	29278.3	32	0.2	0.00268096	0	1	747	5	503	0.35743	0.186853	9	-1		-1	0.147549
C2_09730C_A	17.73	135444	39	0.17	0.00380228	-1	-1	1053	4	58	0.517569	0.0279355	14			-1	0.147368
C1_11790W_A	22.45	761.129	41	0.16	0.00445104	0	1	675	1	1	0.74963	0.0340053	4	-1		-1	0.146514
C2_03210W_A	94.63	133010	31	0.25	0.00911162	0	0	440	1	200	0.653333	0.133523	11			-1	0.146205
C1_09030C_A	509.7	255929	35	0.37	0.00402414	-1	-1	498	2	63	0.682731	0.053819	1		-1	-1	0.146187
C4_04930C_A	14.56	5962.83	0	0.14	0.0143541	0	1	837	39	3434	0.14098	0.402553	37	-1		-1	0.145833
C7_03810W_A	36.99	3897.54	173	0.22	0.00156691	-1	-1	3192	20	609	0.293546	0.0623913	2		-1	-1	0.145478
C6_01050W_A	27.55	2650.14	16	0.19	0.00797342	-1	-1	1506	3	51	0.618858	0.0439251	2			-1	0.145439
C7_02320W_A	19.54	699.343	187	0.17	0.00299273	0	1	2340	84	6477	0.361111	0.14359	3	-1		-1	0.145298
C2_07910C_A	99.43	20087	27	0.16	0	0	0	177	8	994	0.858757	0.483142	18			-1	0.145236
C1_00800C_A	61.68	8856.63	135	0.24	0.00153139	-1	-1	654	2	69	0.48318	0.0850887	0	-1		-1	0.145076
CR_04400W_A	4.44	181.944	0		0.00892857	0	0	225	4	61	0.515556	0.382304	10			-1	0.145
C7_02520W_A				0.12	0.0126422	0	0	792	22	943	0.205808	0.181376	10			-1	0.144852
C2_01990C_A	7.89	410.702	64	0.15	0.00241301	-1	-1	7875	18	1020	0.434032	0.0380621	4			-1	0.144625
C2_10290W_A	257.33	104415	6	0.22	0.00857318	0	0	1631	9	1520	0.623737	0.135811	6			-1	0.144283
C3_04100W_A				0.18	0.00208768	0	0	480	92	7716	0.09375	0.611271	45			-1	0.143525
C7_03790W_A	52.1	4366.21	315	0.22	0.000855432	-1	-1	1170	8	164	0.51453	0.0641467	3			-1	0.143522
C6_01550C_A	7.93	341.12	45	0.16	0.00271297	-1	-1	3688	8	160	0.375	0.0395586	0			-1	0.143355
C3_00510W_A	10.64	954.676	0	0.13	0.000921659	0	1	1086	23	1735	0.161142	0.233441	16		-1	-1	0.143095
C6_01820C_A	34.67	11229.8	2	0.13	0.00253165	0	0	1186	16	1657	0.223414	0.152017	34	-1		-1	0.143064
C1_11160C_A	102.49	98031.5	247	0.18	0.00327869	-1	-1	306	5	451	0.323529	0.282947	4			-1	0.143063
C2_04380C_A	28.49	545.997	56	0.17	0.00194301	-1	-1	1545	1	1	0.77411	0.0108139	1			-1	0.142661
C3_02600C_A	51.97	8129.15	12	0.18	0	-1	-1	882	3	179	0.6678	0.0266148	6	-1		-1	0.142592
C2_04170C_A	1186.52	1.74963e+06	21	0.42	0	-1	-1	231	4	186	0.406926	0.278263	7			-1	0.142519
C2_05180W_A	528.96	6.53527e+07	7	0.52	0	0	0	198	3	125	0.409091	0.219154	3			-1	0.142438
C2_10230W_A				0.14	0.0131354	1	0	1752	30	1624	0.121005	0.199376	0		-1	-1	0.142148
C2_02820C_A	22.47	19706.2	103	0.13	0.00471254	-1	-1	1062	3	634	0.396422	0.0550104	6			-1	0.141528
C5_04710W_A	18.02	609.434	7	0.13	0.00517751	-1	-1	1353	1	1	0.745011	0.00835991	1			-1	0.141111
C1_01060W_A	839.36	377747	1	0.4	0.0021978	-1	-1	456	3	58	0.666667	0.101588	7			-1	0.141065
C1_06550W_A	52.07	12577.7	0	0.4	0.00438871	-1	-1	6381	199	19819	0.0322833	0.241217	4			-1	0.140997
C7_02940C_A	18.32	2346.27	150	0.15	0.00217108	-1	-1	2304	3	11	0.307726	0.0107226	8			-1	0.140974
C1_04280C_A	7.83	759.631	55	0.13	0.00253378	0	1	1185	2	45	0.54346	0.0286254	5	-1		-1	0.140675
C5_04310W_A	8.83	194.313	248	0.13	0.0050537	0	0	1584	9	77	0.306818	0.0658835	8			-1	0.140673
C4_05020W_A	8.56	615.189	5	0.15	0	-1	-1	372	4	66	0.44086	0.0742816	1		-1	-1	0.140556
C3_07770C_A	22.18	12106.3	12	0.12	0.00329308	-1	-1	903	4	83	0.305648	0.0579593	2			-1	0.140542
C3_07480W_A	44.87	5175.69	7	0.14	0.00597015	0	1	1341	36	2381	0.149142	0.214394	17	-1		-1	0.140514
C3_04140C_A	1017.08	780656	123	0.65	0	-1	-1	537	52	5160	0.163873	0.292849	40	-1		-1	0.140175
C6_02600W_A	40.95	13720.8	1	0.18	0.00199203	0	1	2511	42	3391	0.085225	0.180645	8	-1		-1	0.140093
C6_02350C_A	21.57	15625.7	409	0.23	0.004111	-1	-1	1947	20	798	0.8646	0.20535	5			-1	0.14
CR_07580C_A	4.61	249.162	215	0.14	0.00258866	0	1	3864	31	1275	0.518375	0.0820051	14	-1		-1	0.139645
C1_12590W_A	253.59	67780.2	152	0.33	0.00581395	-1	-1	345	5	271	0.437681	0.245414	1		-1	-1	0.139394
C2_06170C_A	44.86	5024.03	1	0.28	0.00440529	-1	-1	4314	62	6595	0.0769587	0.170676	5			-1	0.138894
C2_03430W_A	25.75	3247.07	0	0.11	0.00223214	-1	-1	897	3	62	0.74136	0.0504119	1	-1		-1	0.138542
C1_04400C_A	222.89	41803.2	0	0.36	0.00683442	-1	-1	3220	53	5372	0.180901	0.287528	1			-1	0.138114
C6_01710C_A	33.29	20311.3	0	0.17	0.00287121	-1	-1	2439	9	463	0.701927	0.0627306	9	-1		-1	0.138053
C4_04180C_A	13.97	1664.54	14	0.13	0.004158	-1	-1	963	1	15	0.88785	0.0107344	0	-1		-1	0.137775
C5_05050W_A	4543.27	9.88683e+07	33	0.63	0.000953289	0	0	1053	14	792	0.588794	0.260475	1			-1	0.137081
C7_00520W_A	59.39	2886.64	2	0.18	0.000916031	-1	-1	3276	23	1094	0.16453	0.0743692	7			-1	0.136705
C1_11300C_A	13.41	2342.79	67	0.15	0.000573066	0	1	1746	7	38	0.452463	0.091812	5	-1		-1	0.136485
C3_05120C_A	69.62	34159.5	39	0.19	0.00163666	-1	-1	612	12	1450	0.374552	0.09719	29			-1	0.136431
C1_10940C_A	186.57	665508	5	0.29	0	-1	-1	719	2	23	0.747336	0.0546076	5			-1	0.134937
C2_03230C_A	94.24	8562.86	67	0.28	0.00113895	-1	-1	879	6	107	0.526735	0.170118	0	-1		-1	0.134684
C2_00920W_A	11.16	1723.72	15	0.2	0	0	0	669	4	745	0.469357	0.15169	0			-1	0.134476
C3_04690C_A	13.33	167.241	0	0.16	0	0	0	1023	55	5106	0.293255	0.150942	46			-1	0.134444
C3_05520C_A	45.49	2407.25	41	0.22	0.00269231	-1	-1	2601	23	561	0.156094	0.0630769	3			-1	0.134094
C2_05550W_A	71.56	22043.9	44	0.23	0.00257069	0	0	390	3	444	0.664103	0.142186	6			-1	0.133971
C4_02940W_A	121.72	27332.7	2	0.24	0.00359712	-1	-1	1947	37	5634	0.228557	0.223968	16			-1	0.133597
C3_04330C_A	70.8	2.27656e+06	134	0.16	0.0021978	0	0	456	132	33574	0.150127	0.815287	59			-1	0.133525
C1_01910W_A	97.26	11593	272	0.21	0.0018797	-1	-1	1065	7	384	0.618779	0.118153	10			-1	0.13342
C1_03380W_A	88.14	76712.8	70	0.19	0.00112528	-1	-1	2667	12	602	0.564679	0.0849894	0	-1		-1	0.133263
C1_12750C_A	9.11	349.167	244		0.00448143	-1	-1	1563	3	35	0.893154	0.0369288	5			-1	0.13271
C4_06460C_A	13.16	473.138	106	0.16	0.0103858	-1	-1	675	2	25	0.842963	0.0392215	23			-1	0.132593
C1_13100W_A	0.48	1.14154e+06	3	0.18	0.00465116	0	0	216	3	605	0.555556	0.552481	0			-1	0.13256
C1_02700C_A	231.42	2.62548e+06	1	0.41	0	0	0	174	2	178	0.373563	0.272689	8			-1	0.132519
C1_04670W_A	33.81	6720.35	5	0.18	0.0016116	-1	-1	1242	5	122	0.623188	0.055654	8		-1	-1	0.132325
C3_01980C_A	298.24	151391	40	0.36	0	-1	-1	171	8	506	0.789474	0.448732	20			-1	0.132188
C6_03200W_A	52.47	5394.5	221	0.16	0.0053135	0	0	942	6	570	0.550955	0.0802183	0		1	-1	0.132051
CR_00050W_A	5.87	3297.76	2	0.21	0.00175593	0	0	1140	3	104	0.37807	0.0877718	8		-1	-1	0.131955
C2_10060C_A	6.07	442.204	132	0.18	0.00413223	0	1	969	3	258	0.524252	0.0326679	21	-1		-1	0.131036
CR_09650W_A	27.79	5218.1	0	0.16	0.00560486	0	1	2142	27	1862	0.165733	0.299573	0	-1		-1	0.131
C2_08550C_A	5.79	155.931	168	0.16	0.00319767	-1	-1	3441	19	254	0.172915	0.0553508	14	-1		-1	0.130727
C5_01720C_A	8.01	87.0673	220	0.17	0.00430528	-1	-1	2556	6	431	0.581377	0.0161104	1	-1		-1	0.130625
C6_01360W_A	30.95	28595	8		0	0	0	342	7	130	0.21345	0.335694	1			-1	0.130476
C1_09040C_A				0.15	0.00956938	-1	-1	1465	9	108	0.662799	0.0910232	11	-1		-1	0.13037
C5_04170W_A	35.77	7134.32	62	0.16	0.00311139	-1	-1	1608	7	222	0.579602	0.0701222	0			-1	0.130081
C1_04090C_A	7.23	454.647	247	0.18	0.00336248	-1	-1	1488	14	452	0.893145	0.190181	1		-1	-1	0.13
C1_07510W_A	29.94	699.511	230	0.18	0.00240096	-1	-1	834	51	3879	0.125899	0.35394	28		-1	-1	0.13
C2_06850W_A	17.26	1122.82	268	0.19	0.00294551	-1	-1	680	5	276	0.755776	0.128005	12			-1	0.13
C5_01700W_A	68.81	11684.3	390	0.2	0.00474683	-1	-1	633	9	885	0.466035	0.120656	2		-1	-1	0.129838
CR_00340C_A	35.4	8327.65	0	0.19	0	0	0	192	3	177	0.354167	0.478536	6			-1	0.129697
C4_06740C_A	26.73	3470.41	52	0.18	0.00336889	-1	-1	1782	9	287	0.401235	0.0598285	0		-1	-1	0.129314
C4_03410W_A	67.1	8008.21	328	0.23	0.00685714	-1	-1	876	1	86	0.992009	0.0144528	2	-1		-1	0.128571
C1_01790W_A	22.29	1130.78	17	0.18	0.00342146	-1	-1	3216	7	558	0.412092	0.0380522	1	-1		-1	0.12798
C4_04000W_A	12.79	2269.74	0	0.15	0.011236	0	1	1158	30	2654	0.168394	0.324888	2		-1	-1	0.127632
CR_10140W_A	112.9	10660.5	30	0.29	0.000462535	0	0	2163	8	941	0.353213	0.108784	1	-1		-1	0.127564
C1_03550C_A	76.01	7267.7	0	0.16	0.00208044	-1	-1	1443	2	6	0.992377	0.0220074	5	-1		-1	0.126907
C6_04540C_A	56.76	15849.2	3	0.18	0.00174216	-1	-1	1149	13	1246	0.314186	0.0527534	16	-1		-1	0.126903
CR_03090C_A	245	293046	15	0.32	0.00401606	-1	-1	499	1	17	0.993056	0.0414104	3	-1		-1	0.126742
C3_03790W_A	82.62	10087.7	140	0.23	0.000967118	-1	-1	1035	66	7896	0.18744	0.290685	35			-1	0.12658
CR_10750C_A	124.01	60417.1	57	0.25	0	-1	-1	405	5	1540	0.422222	0.179077	9		-1	-1	0.126478
C2_02910W_A	2.79	65289.3	0	0.16	0.00380228	0	0	264	4	320	0.621212	0.292707	2			-1	0.12619
C2_09060C_A	392.04	136030	118	0.39	0.00348635	-1	-1	1722	58	5545	0.0824623	0.287762	2			-1	0.125816
C2_09780C_A	127.79	38063.7	23		0	0	0	720	22	1583	0.430556	0.234093	49			-1	0.125442
C4_02500C_A				0.14	0.0195019	-1	-1	4257	62	6086	0.157858	0.215834	6		-1	-1	0.125306
CR_05440W_A	59.6	5053.87	3	0.18	0.00194175	-1	-1	516	5	888	0.344961	0.152142	19			-1	0.125218
C3_02040C_A	66.04	29118.3	345	0.2	0.00322581	-1	-1	621	11	556	0.508857	0.130878	4			-1	0.125179
C6_04280W_A	110.02	17901.6	8	0.19	0.00286533	0	1	699	11	281	0.449213	0.107248	5	-1		-1	0.1246
C4_00750C_A				0.16	0	0	0	537	4	59	0.439479	0.172892	5			-1	0.12448
C4_07200C_A	30.34	35339.6	0	0.14	0.00415973	0	1	1203	34	5239	0.232751	0.605368	16	-1		-1	0.124444
C2_04710C_A	47.74	7429.46	23	0.2	0.00193424	-1	-1	1035	3	107	0.776812	0.0597553	4			-1	0.12435
C1_08420W_A	46.06	3044	13	0.2	0.0018797	-1	-1	2661	14	636	0.188275	0.05872	4	-1		-1	0.124269
C2_01390W_A	42.55	9523.84	54	0.19	0.00191326	1	0	1569	11	705	0.414914	0.123667	0	-1		-1	0.124172
C2_04330C_A	23.68	1384.08	86	0.12	0	-1	-1	1011	7	136	0.513353	0.0969871	1			-1	0.124
C3_06330W_A	1468.97	1.02683e+07	16	0.62	0	0	0									-1	0.123585
C2_01590W_A	1191.47	3.57601e+06	13	0.42	0	-1	-1	405	3	556	0.367901	0.138769	7			-1	0.123484
C4_02770C_A	20.64	2459.02	21	0.17	0.00771456	0	1	1038	4	20	0.414258	0.0871714	6		-1	-1	0.123189
CR_08370W_A	63.69	12203	19	0.17	0.00137268	-1	-1	1458	3	60	0.521948	0.0163323	4			-1	0.12312
C1_04030W_A	14.78	1116.47	0	0.18	0.0019084	-1	-1	2097	4	155	0.97711	0.0425834	9			-1	0.122874
C4_01160W_A	111.09	263514	1	0.41	0.00434783	0	0	231	4	429	0.463203	0.468411	3			-1	0.122555
C2_07900W_A	79.19	261928	12	0.36	0.00378549	-1	-1	3171	65	7589	0.0564491	0.219703	3	-1		-1	0.122418
C2_04870C_A	36.72	2674.89	9	0.16	0.00145048	-1	-1	4827	18	1698	0.589393	0.0686807	5		-1	-1	0.122303
C2_10110W_A	544.53	420492	59	0.51	0	-1	-1	333	3	85	0.369369	0.0913272	4			-1	0.121944
C7_02750W_A					0.00975293	0	0									-1	0.121898
CR_05070W_A					0.0103093	0	0									-1	0.121898
CR_05600C_A					0.0103093	0	0									-1	0.121898
C3_05970C_A	47.91	14939.4	16	0.17	0.0142327	-1	-1	1617	29	2201	0.390847	0.133175	4			-1	0.121556
C3_07600W_A	41.67	9636.33	272	0.2	0.00153846	-1	-1	651	27	1204	0.22427	0.357808	35	-1		-1	0.121371
C4_06410W_A	4.08	354.092	131	0.17	0.0059125	0	1	2538	19	1907	0.470055	0.0934777	16	-1		-1	0.12137
C1_03790C_A	164.64	57841.3	334	0.43	0.00625	-1	-1	1281	13	693	0.201405	0.200291	7		-1	-1	0.121343
C6_03650C_A	37.35	4965.64	21	0.16	0.00405954	-1	-1	1479	14	1036	0.759297	0.106148	0			-1	0.121326
C2_10560C_A	205.23	126020	14	0.17	0.00490998	-1	-1	612	33	5906	0.142157	0.423328	18			-1	0.120985
C1_06680W_A	7.31	251.073	137	0.16	0.00326584	-1	-1	3063	19	1828	0.261182	0.0519354	19		-1	-1	0.120625
C1_02690C_A	0	5314.45	0	0.27	0.0165563	0	0	303	4	531	0.521452	0.305875	3			-1	0.120476
C4_04330C_A	123.5	30494	0	0.17	0.0132597	0	0	906	61	4378	0.111479	0.634795	18			-1	0.120474
C5_05190W_A	9.22	7071.4	37	0.26	0.00328228	-1	-1	915	5	315	0.484153	0.0680803	7		-1	-1	0.120417
C1_09020W_A	105.54	47395.7	65	0.3	0.00675676	0	0	744	7	238	0.526882	0.118203	2	-1		-1	0.120243
C1_00350C_A	95.77	115687	0	0.27	0.00114286	-1	-1	876	4	223	0.432648	0.118814	1			-1	0.12015
C1_11760C_A	67.51	6519.3	94	0.21	0.00958466	0	0	627	6	138	0.373206	0.16601	4			-1	0.12
C3_05940C_A	14.78	278.149	47	0.16	0.00162866	-1	-1	615	12	1028	0.256911	0.117694	36			-1	0.12
C6_01850W_A	21.99	834.024	7	0.13	0.0043592	-1	-1	2295	3	99	0.572985	0.0157103	1	-1		-1	0.12
CR_01180W_A	40.4	1795.6	222	0.19	0.00356295	-1	-1	843	4	18	0.524318	0.142248	5			-1	0.12
C6_00120W_A	69.45	110849	1	0.14	0.0122449	-1	-1	246	10	579	0.5	0.634056	6			-1	0.119942
C1_12040W_A	0	11.1134	0	0.16	0.0162413	0	0	432	4	597	0.523148	0.169219	0		-1	-1	0.119226
C1_05790W_A	111.71	108592	51	0.24	0.00478469	0	0	210	3	199	0.457143	0.149165	14			-1	0.119186
C1_11280W_A	21.01	10300.4	0	0.17	0.00091659	0	1	1092	22	1461	0.277473	0.414714	6	-1		-1	0.11875
C1_11960C_A	82.52	41843.8	15	0.15	0	-1	-1	255	3	133	0.541176	0.232661	7			-1	0.118559
C1_02650W_A	235.2	68601.3	143	0.27	0	0	0	603	4	326	0.558872	0.131436	6		-1	-1	0.118021
C1_02960C_A	30.71	10824.2	26	0.14	0.00223839	-1	-1	1788	2	2	0.446868	0.0231946	6	-1		-1	0.117986
C2_09400C_A	50.01	3372	1	0.16	0.00148588	-1	-1	1347	1	1	0.797327	0.00803806	9	-1		-1	0.117862
C4_02390W_A	3236.69	1.64996e+07	1	0.8	0.00624025	0	0	642	16	1715	0.288162	0.588356	1		-1	-1	0.116177
C1_08670W_A	19.85	447.117	42	0.17	0.00502513	-1	-1	2190	4	169	0.485845	0.0195577	1	-1		-1	0.116105
CR_10350C_A	660.74	6.19261e+06	22	0.46	0	-1	-1	312	6	370	0.474359	0.485005	0	-1		-1	0.116015
C3_02190C_A	184.29	44551.2	96	0.25	0.00473934	0	0	423	6	49	0.373522	0.110626	16			-1	0.115822
C2_03470C_A	655.75	2.43806e+06	59	0.53	0.00189394	-1	-1	529	3	52	0.545254	0.148506	1			-1	0.115726
CR_03120W_A	51.85	27105.2	27	0.19	0.0113636	-1	-1	969	14	1901	0.223942	0.227216	13			-1	0.115604
C5_03890C_A	0	12870	0	0.14	0	0	0	258	7	1151	0.542636	0.598628	1			-1	0.115476
C1_06600W_A	241.34	88257.2	1	0.23	0.00671141	-1	-1	1044	46	7928	0.172414	0.3614	15			-1	0.115475
CR_03610C_A	48.61	2906.38	0	0.26	0.00254885	1	0	2355	17	1047	0.259023	0.171517	6	-1		-1	0.114972
C3_04740C_A	10.4	708.063	8	0.13	0.00105876	-1	-1	1890	30	1843	0.281481	0.0426727	10	-1		-1	0.114625
C7_03330C_A	207.28	20310.4	234	0.33	0.00405132	-1	-1	1482	20	2643	0.134278	0.132229	13			-1	0.114609
C2_07800W_A	54.78	60815.8	175	0.27	0.00295858	-1	-1	339	5	278	0.460177	0.190237	11			-1	0.114371
C2_02740C_A	239.76	52692.4	266	0.33	0.00156006	-1	-1	642	17	1934	0.260125	0.424335	5	-1		-1	0.11406
C4_03200C_A	28.69	2782.49	56	0.14	0.008	-1	-1	876	3	110	0.371005	0.0373659	15		-1	-1	0.113704
C3_00320W_A	617.54	3.72314e+06	3	0.43	0.0052356	1	0	765	14	921	0.237908	0.265546	6	-1		-1	0.113677
C6_02540C_A	13.92	3916.57	4	0.18	0	0	0	681	4	482	0.613803	0.0767884	21		-1	-1	0.113311
C2_08520C_A	0	547.947	0	0.11	0.00621118	0	0	162	4	187	0.777778	0.218562	9			-1	0.113214
C1_01030W_A	150.57	17599.4	298	0.27	0.00294406	-1	-1	1020	12	1419	0.294118	0.181234	2		-1	-1	0.113157
C1_05410C_A	131.67	48356.6	0	0.3	0.00180505	0	0	555	15	820	0.124324	0.212443	24			-1	0.112986
C3_06180C_A	1468.97	1.02683e+07	16	0.62	0.00169491	-1	-1									-1	0.11296
C1_07850C_A	5.23	49.5652	27	0.15	0.00347463	-1	-1	1440	1	116	0.899306	0.00585826	26		-1	-1	0.112874
C2_07290W_A	197.61	62332.8	31	0.31	0.00104602	-1	-1	957	11	620	0.168234	0.120101	25			-1	0.112862
CR_04300W_A	94.86	6364.22	317	0.24	0.0032695	-1	-1	2142	18	1612	0.228291	0.153008	7			-1	0.112828
C2_01340W_A	53.9	17927.3	95	0.15	0	-1	-1	1734	8	153	0.7203	0.0769031	3	-1		-1	0.112772
C3_03190C_A	17.69	3123.63	75	0.14	0	-1	-1	1410	2	114	0.704255	0.00645772	9	-1		-1	0.112593
C1_01640W_A	97.22	63569.7	47		0.00515844	1	0									-1	0.112555
C1_05450W_A	0	3495.1	0	0.11	0.0101215	0	0	495	9	1260	0.531313	0.158874	0			-1	0.1125
C2_01430W_A	180.84	32978.4	180	0.35	0.00176678	-1	-1	567	3	177	0.601411	0.101131	8			-1	0.112396
C4_01060W_A	26.67	599.162	14	0.22	0.00181884	-1	-1	5499	18	623	0.453901	0.0699493	4			-1	0.112292
C6_01210W_A	175.4	53128.5	21	0.24	0.00242718	-1	-1	413	19	1940	0.247126	0.747649	31			-1	0.11227
C4_00620C_A	45.22	8349.26	0	0.16	0	-1	-1	510	4	632	0.35098	0.0759315	13			-1	0.1121
C2_01760C_A	6.25	82.7297	55	0.14	0.00151745	0	0	660	3	65	0.642424	0.181684	7			-1	0.112083
C3_00380C_A	9.05	3052.27	99	0.13	0.00049334	-1	-1	2028	8	592	0.972387	0.0617568	17			-1	0.112
C1_12500C_A					0.0104167	0	0									-1	0.111898
C2_05600W_A					0.0104167	0	0									-1	0.111898
C1_07920W_A	196.73	168638	56	0.2	0	0	0	192	5	99	0.489583	0.346102	14			-1	0.111559
C2_06910W_A	55.25	13828	45	0.17	0.0107198	-1	-1	654	7	334	0.396024	0.148146	1		-1	-1	0.111331
CR_01010W_A	5.2	1051.58	62	0.13	0.00263158	0	0	381	7	257	0.291339	0.407602	1			-1	0.11131
C2_07030C_A	64.33	6850.84	288	0.21	0.00245399	-1	-1	816	8	444	0.631127	0.148968	3			-1	0.111195
C4_04910C_A	13.31	246.518	28	0.12	0.00942126	0	0	744	6	411	0.561828	0.0866005	3		-1	-1	0.111101
C3_06900W_A	27.41	2406.89	59	0.15	0.017192	-1	-1	699	1	5	0.995708	0.0194663	9			-1	0.111002
C5_01340W_A	30.34	3596.31	3	0.15	0.00205058	-1	-1	1464	16	1128	0.574454	0.138316	0		1	-1	0.11099
C1_14520W_A	157.65	50855.9	31		0.0113101	0	0	1062	43	4081	0.106403	0.670024	1		-1	-1	0.110972
CR_03790C_A	39.7	75959.9	4	0.13	0	-1	-1	393	6	95	0.333333	0.397393	0	-1		-1	0.110833
C2_02970C_A	753.62	7.21304e+08	0	0.52	0.00133422	-1	-1	1500	13	776	0.474667	0.163282	1			-1	0.110798
C3_07690C_A	77.56	26413	112	0.19	0.00371747	0	0	808	34	3153	0.151394	0.406518	47			-1	0.11073
C3_07230W_A	16.37	420.402	221	0.18	0.00277638	-1	-1	3963	6	306	0.797628	0.0155557	15		-1	-1	0.110625
C7_02120C_A	61.15	24266.5	270	0.16	0	-1	-1	462	16	740	0.272727	0.194879	24			-1	0.110531
C3_07700W_A	106.24	14461.1	169	0.14	0	-1	-1	780	32	3360	0.185897	0.370639	47	-1		-1	0.110453
CR_05180C_A	298.83	346708	10	0.44	0.00126422	-1	-1	792	4	129	0.614899	0.109869	1			-1	0.11044
C1_02450C_A	35.56	7763.08	338	0.17	0.00188679	-1	-1	531	2	127	0.642185	0.11185	0	-1		-1	0.110326
C1_12510W_A	11.45	688.302	77	0.17	0.00287013	-1	-1	4182	15	141	0.216165	0.0754936	0	-1		-1	0.110102
CR_04750W_A	32.43	7703.65	159	0.25	0.0037594	-1	-1	267	4	235	0.453184	0.293504	7			-1	0.110081
C1_06380C_A	27.41	11713.5	13	0.16	0.0185759	0	0	324	19	1120	0.317901	0.485826	40			-1	0.11
C1_12910W_A	13.09	312498	0	0.41	0.00609756	0	0	165	8	206	0.406061	0.871049	3			-1	0.11
C4_05100C_A	29.45	4660.44	113	0.2	0.00455696	1	0	3951	51	6076	0.573273	0.115278	0		-1	-1	0.11
C5_00490C_A	7.74	335.018	293	0.15	0.00188527	-1	-1	3714	16	468	0.393107	0.0686249	1			-1	0.11
C6_03440W_A	10.93	1371.61	258	0.14	0.000433651	-1	-1	2307	6	205	0.725618	0.0276186	9			-1	0.11
CR_09460C_A	38.01	90261.2	0	0.18	0.0102389	0	0	294	8	221	0.452381	0.888498	0			-1	0.109665
C6_01530C_A	2.06	172008	0	0.5	0	-1	-1	117	6	413	0.376068	0.951621	0			-1	0.109583
CR_01490C_A	279.93	60712	5	0.32	0.00265252	-1	-1	378	3	195	0.614583	0.317687	0			-1	0.109557
C1_10690W_A	42.09	4924.53	59	0.15	0.00205339	-1	-1	975	3	173	0.676923	0.045955	7	-1		-1	0.109393
C1_14290C_A	227.62	45810.4	0	0.31	0.00717489	-1	-1	2231	11	601	0.470499	0.105476	2			-1	0.109364
C2_04230W_A	60.1	9662.76	6	0.25	0.00592718	1	0	1182	10	447	0.340102	0.136078	6		-1	-1	0.108929
C1_08410C_A	188.44	47875.8	16	0.25	0.00106952	-1	-1	936	37	6612	0.153846	0.465623	1	-1		-1	0.108693
C2_04810W_A	14.36	5283.79	59	0.2	0.00449102	-1	-1	669	2	728	0.666667	0.0531283	1	-1		-1	0.108542
C7_02610C_A	113.39	244396	22		0.00314795	0	0	953	85	10082	0.111228	0.605671	0			-1	0.108211
C2_00320W_A	93.23	9986.18	0	0.18	0	-1	-1	600	8	837	0.32	0.204374	24		-1	-1	0.10783
C1_04590W_A	227.36	1.93428e+06	5	0.19	0	0	0	189	3	46	0.582011	0.252304	3			-1	0.107184
CR_04580W_A	133.05	14455.3	306	0.17	0.00321027	-1	-1	624	3	124	0.407051	0.108556	6			-1	0.106974
C3_04550C_A	75.11	105774	21	0.12	0.000801925	-1	-1	1248	461	103493	0.0392628	0.732266	61		-1	-1	0.106858
C2_08400C_A	0	498.358	0	0.11	0	0	0	120	5	209	0.508333	0.428241	0			-1	0.106726
C1_09690W_A	64.59	1.68263e+06	74	0.56	0.00181269	-1	-1	1656	15	1228	0.385266	0.128699	2	-1		-1	0.106505
C3_07400W_A	50.98	3839.94	365	0.2	0.00340522	-1	-1	882	15	1224	0.212018	0.122934	18		-1	-1	0.106126
C1_02930C_A	25.95	1693.81	98	0.17	0	-1	-1	1368	1	1	0.919591	0.014212	5	-1		-1	0.105724
C6_03950C_A	19.97	3841.15	79	0.13	0.00393701	-1	-1	1017	7	156	0.794494	0.0488934	0	-1		-1	0.105111
C3_06740W_A	21.47	1712.83	228	0.16	0.00509165	0	0	1965	11	171	0.33944	0.0646075	2		-1	-1	0.104949
C3_02430W_A				0.2	0.000430293	-1	-1	2325	26	1407	0.523011	0.138972	0			-1	0.10493
C2_07660W_A	15.68	1579.09	28	0.16	0.00204551	0	1	3912	38	2585	0.105317	0.113493	0	-1		-1	0.104785
C1_00270W_A	4.03	329216	3	0.21	0.0100111	0	0	900	8	540	0.422222	0.261898	0			-1	0.104583
C6_00820W_A	455.56	279089	23	0.45	0.00477707	-1	-1	1257	6	247	0.305489	0.116574	0	-1		-1	0.104496
C6_03890C_A	48.78	2225.87	0	0.14	0.00693241	-1	-1	1155	31	2514	0.222511	0.231369	29			-1	0.104371
C2_07520C_A	27.27	2530.4	6	0.14	0.00589102	-1	-1	1359	1	48	0.945548	0.00805852	6			-1	0.104271
C1_02060W_A	71.83	14997.6	0	0.15	0.00634921	-1	-1	631	3	199	0.707865	0.233416	3			-1	0.103619
C3_00370C_A	77.61	12476.9	119	0.13	0	-1	-1	660	7	549	0.440909	0.164567	13			-1	0.103563
C1_10260C_A	70.31	40696	166	0.2	0.00415512	-1	-1	723	3	118	0.503458	0.0812739	4		-1	-1	0.103194
C7_04210C_A	213.68	43626.6	0	0.18	0.00546946	0	0	1098	42	5539	0.153916	0.717026	7	-1		-1	0.102869
C5_01710C_A	3.65	211.211	228	0.15	0.00361011	0	0	2217	17	523	0.447	0.061477	13		-1	-1	0.102625
C1_09990W_A	30.14	1062.03	71	0.21	0.00161638	-1	-1	1857	9	164	0.678514	0.0889438	13			-1	0.102576
C4_07160W_A	48.83	7464.55	13	0.13	0.00558659	0	0	180	5	669	0.588889	0.32868	16			-1	0.102536
C6_00200C_A	432.83	520481	24	0.21	0	0	0	333	4	172	0.45045	0.199872	10			-1	0.102519
C3_02670W_A	12.27	2398.38	131	0.14	0.00264901	-1	-1	756	3	137	0.707672	0.0347763	34		-1	-1	0.102508
C2_10350C_A	77.59	540586	3	0.39	0.00197336	-1	-1	2028	70	7326	0.0670611	0.502824	6			-1	0.102343
CR_04650W_A	107.1	13820.1	55	0.3	0	-1	-1	288	2	191	0.524306	0.136482	11			-1	0.102264
C2_00150W_A	29.54	65466.2	9	0.14	0.000815661	-1	-1	1227	1	83	0.893236	0.0183869	7	-1		-1	0.102166
CR_00320C_A	167.19	22043.1	30	0.32	0	-1	-1	1308	9	123	0.392966	0.228841	2		-1	-1	0.101907
C1_09890C_A					0.0106383	0	0									-1	0.101898
C4_01600C_A					0.0108696	0	0									-1	0.101898
C4_01610C_A					0.0108696	0	0									-1	0.101898
C4_01620C_A					0.0108696	0	0									-1	0.101898
C5_03420W_A					0.0107527	0	0									-1	0.101898
CR_05410C_A					0.0107527	0	0									-1	0.101898
C2_05910W_A	16.15	2056.12	18	0.14	0.00286416	0	0	2445	12	1053	0.478937	0.0845127	0	-1		-1	0.101606
C2_06610C_A				0.18	0.0247934	0	0	243	11	815	0.45679	1.134	0			-1	0.101146
C7_01350C_A	15.99	828.112	224	0.21	0.00729927	-1	-1	960	2	14	0.578125	0.0206357	26	-1		-1	0.101111
C5_01910W_A	628.72	274549	51	0.5	0.00948767	-1	-1	528	26	3628	0.104167	0.289891	9			-1	0.1008
C6_00770C_A	13.12	543.822	2	0.13	0.0021645	-1	-1	1849	4	275	0.505102	0.0363332	7			-1	0.100625
C2_04490W_A	137.03	15164.5	0	0.26	0.00147711	-1	-1	678	6	149	0.684366	0.188689	9		-1	-1	0.100563
C1_05500W_A	12.85	1435	392	0.21	0.00175979	-1	-1	2274	10	238	0.30343	0.0418872	15	-1		-1	0.1
C1_09330W_A	19.15	1962.68	448	0.21	0.00834724	-1	-1	600	7	714	0.326667	0.172024	6		-1	-1	0.1
C2_05390C_A	2.41	81.0197	0	0.17	0.00721154	0	0	417	8	259	0.685851	0.296473	8			-1	0.1
C5_00740W_A	14.09	269.604	39	0.17	0.00204918	-1	-1	489	23	1426	0.271984	0.64809	34			-1	0.1
C5_01020C_A	17.34	1116.11	39	0.16	0.00363636	-1	-1	276	3	435	0.550725	0.139538	17			-1	0.1
C5_02790C_A	84.69	17145.1	5	0.18	0.00114416	0	0	1749	69	6280	0.101201	0.299546	8			-1	0.0993343
C6_04510C_A	16.62	3345.21	0	0.12	0.00206754	0	0	1452	13	2714	0.847107	0.0542317	47	-1		-1	0.0993179
C1_12400C_A	47.65	5665.41	24	0.14	0.0106101	0	0	378	5	433	0.34127	0.269683	0			-1	0.0993075
C1_05470W_A	24.09	1700.65	50	0.16	0.000953289	-1	-1	1050	1	23	0.931429	0.00963354	6			-1	0.098899
C1_08820C_A	15.51	22320.4	0	0.12	0.0110759	-1	-1	633	7	446	0.575039	0.105449	25			-1	0.09875
C5_01960C_A	75.27	9157.9	1	0.22	0.000531067	-1	-1	1884	76	5394	0.07431	0.281868	23	-1		-1	0.097872
C1_05360C_A	32.1	6441.15	273	0.17	0.000552181	1	0	1812	20	1329	0.322296	0.0797037	0		-1	-1	0.0976125
C5_00220W_A	26.62	1434.4	11	0.18	0.000764818	-1	-1	2616	9	560	0.438456	0.0452968	24		-1	-1	0.0974995
C2_01300C_A	9.36	4494.18	119	0.15	0.000469704	0	0	2130	7	594	0.46385	0.0641121	2	-1		-1	0.0970917
C7_01180W_A	14.82	2366	0	0.15	0.00622084	-1	-1	1287	9	378	0.646465	0.0681127	0	-1		-1	0.0970417
C7_03380W_A	43.03	3376.84	33	0.25	0	-1	-1	300	5	61	0.23	0.153083	4			-1	0.0968776
C3_03180C_A	67.32	5891.44	2	0.17	0.00108342	-1	-1	924	79	9955	0.123377	0.39285	44			-1	0.0968579
C1_12430W_A	9.84	459.133	221	0.14	0.00101661	0	1	2952	27	1918	0.309282	0.180794	7	-1		-1	0.0968452
C1_14480W_A	59.91	137500	4	0.07	0	0	0	315	4	311	0.339683	0.207143	1			-1	0.09683
C4_04530C_A	146.88	369314	6		0.0054678	0	0	1647	58	6250	0.0752884	0.260435	2		-1	-1	0.096302
C2_09290W_A	55.96	24247.8	2	0.18	0	-1	-1	313	10	1205	0.783333	0.314605	9			-1	0.0960263
C1_00970W_A	11.7	173.299	1	0.14	0.0114286	0	0	526	4	636	0.616558	0.158435	4			-1	0.095
C1_09480W_A	40.41	466688	0	0.15	0.004914	-1	-1	408	3	20	0.458333	0.139847	8			-1	0.095
CR_04530W_A	99.39	5015.97	0	0.29	0.00144092	-1	-1	1389	17	1042	0.208783	0.228831	5		-1	-1	0.0946584
C7_00340C_A	57	4113.8	8	0.18	0.00171527	-1	-1	2916	54	5337	0.0757888	0.159715	18		-1	-1	0.094499
C1_12030W_A	201.38	27678.1	6	0.4	0.00215672	-1	-1	1392	7	111	0.637931	0.0977938	2	-1		-1	0.0943981
C1_09970C_A	12.14	264.894	0	0.15	0.0059761	0	1	2511	18	1004	0.206292	0.129095	3	-1		-1	0.0940482
C2_10550C_A	61.35	4368.27	20	0.17	0.00248379	-1	-1	7248	173	18106	0.0423565	0.197077	26			-1	0.0938937
C3_05030W_A	108.68	26064.5	24	0.22	0	-1	-1	912	67	4897	0.101974	0.29836	30			-1	0.0936971
C4_00820W_A	23.86	4006.45	268	0.11	0.00454546	-1	-1	1101	7	495	0.555858	0.0864016	0			-1	0.0935443
C2_03000C_A	24.23	2676.23	95	0.14	0.000961538	-1	-1	1041	5	337	0.612872	0.102316	0			-1	0.0935076
C4_07240W_A	163.57	173271	4	0.1	0.00753769	-1	-1	399	15	2022	0.250627	3.18762	19			-1	0.0934351
C5_01460W_A	9.15	106.827	38	0.18	0.00342917	-1	-1	3792	31	2710	0.411656	0.0633197	10	-1		-1	0.0933942
C6_03960W_A	59.14	10563.5	49	0.27	0.000951475	-1	-1	2103	83	9055	0.0603899	0.283392	1			-1	0.0933224
C2_01040W_A	6.49	9381.02	0	0.17	0.00268817	0	0	373	5	225	0.615873	0.43283	5			-1	0.0932143
C6_02840C_A	23.68	3011.31	8	0.18	0.00374065	0	0	1605	21	1911	0.596885	0.180963	0		-1	-1	0.0932143
C1_00360W_A	11.49	644.179	4	0.12	0.000744602	0	0	1344	9	830	0.944196	0.163782	1		-1	-1	0.0931818
C1_05630C_A	164.24	18550	131	0.35	0.00240312	-1	-1	3330	56	4007	0.124925	0.150819	15			-1	0.0929707
C4_04970C_A	234.07	661266	8	0.26	0.00380228	-1	-1	264	7	608	0.515152	0.225161	12			-1	0.0928902
CR_10600C_A	138.75	45571.1	4	0.14	0.00191205	-1	-1	1047	4	543	0.832856	0.0864809	5			-1	0.0927236
C6_04290W_A				0.23	0.011242	-1	-1	1869	57	4610	0.0973783	0.222947	1			-1	0.0926668
C1_08270C_A				0.15	0.00203488	-1	-1	3438	29	1460	0.138743	0.0853286	0		-1	-1	0.0921572
C4_00350W_A	14.66	16223.1	77	0.13	0.00673149	-1	-1	1338	6	262	0.369208	0.0542601	15	-1		-1	0.0921528
CR_02540W_A	15.46	1086.25	34	0.18	0.00300075	-1	-1	2667	7	29	0.48219	0.0536617	2	-1		-1	0.0921245
CR_05390W_A	627.92	1.13529e+06	9	0.69	0	-1	-1	600	8	853	0.481667	0.239003	3		-1	-1	0.0919874
C1_00240C_A					0.0138889	0	0									-1	0.0918977
C1_06300W_A					0.0111111	0	0									-1	0.0918977
C1_11780W_A					0.018018	0	0									-1	0.0918977
C2_00040C_A					0.0140845	0	0									-1	0.0918977
C2_02480W_A					0.0136986	0	0									-1	0.0918977
C2_04890C_A					0.0140845	0	0									-1	0.0918977
C2_06500W_A					0.0116279	0	0									-1	0.0918977
C2_06560W_A					0.0133333	0	0									-1	0.0918977
C2_08300C_A				0.15	0.011194	0	0									-1	0.0918977
C2_09200W_A					0.010989	0	0									-1	0.0918977
C2_09540W_A					0.0136054	0	0									-1	0.0918977
C3_04050W_A					0.0138889	0	0									-1	0.0918977
C3_04850C_A					0.0119048	0	0									-1	0.0918977
C3_05480C_A					0.0136986	0	0									-1	0.0918977
C3_05490C_A					0.0136986	0	0									-1	0.0918977
C3_07520W_A					0.0138889	0	0									-1	0.0918977
C3_07530W_A					0.0114943	0	0									-1	0.0918977
C4_00870W_A					0.0142857	0	0									-1	0.0918977
C4_03010W_A					0.0140845	0	0									-1	0.0918977
C4_03650W_A					0.0140845	0	0									-1	0.0918977
C4_03660W_A					0.0140845	0	0									-1	0.0918977
C4_05990W_A					0.0123457	0	0									-1	0.0918977
C6_00220C_A					0.0121951	0	0									-1	0.0918977
CR_00450C_A					0.016129	0	0									-1	0.0918977
CR_00730C_A					0.0138889	0	0									-1	0.0918977
CR_01450C_A					0.0173913	0	0									-1	0.0918977
CR_02080W_A					0.0166667	0	0									-1	0.0918977
CR_02310C_A					0.0136986	0	0									-1	0.0918977
CR_05810C_A					0.0111111	0	0									-1	0.0918977
CR_06190C_A					0.0111111	0	0									-1	0.0918977
CR_08230C_A					0.0135135	0	0									-1	0.0918977
CR_08750C_A					0.0142857	0	0									-1	0.0918977
C6_00920W_A	318.7	209930	22	0.56	0.0021978	-1	-1	456	5	640	0.403509	0.201006	5			-1	0.0918944
C5_04560C_A	461.84	3.35748e+07	2	0.41	0	0	0	102	8	194	0.323529	1.06312	4			-1	0.0918633
C7_02100W_A	195.25	134667	8	0.33	0.00245098	0	0	1225	55	4021	0.127148	0.3089	28			-1	0.0918576
C1_06480C_A	110.45	22486.2	48	0.24	0.00657895	-1	-1	609	27	1515	0.221591	0.430196	24			-1	0.0917383
C2_02280W_A	42.15	5359.29	105	0.23	0.0022779	-1	-1	879	6	97	0.722412	0.149094	9			-1	0.0916234
C5_02770W_A	17.97	1311.08	157	0.12	0.00417014	-1	-1	1200	6	28	0.525	0.0339725	47	-1		-1	0.0915989
C1_10580C_A	3.92	7082.82	49	0.13	0.0060241	0	0	333	4	38	0.441441	0.252727	9			-1	0.0915385
CR_01240C_A	32.95	1169.35	54	0.15	0.00170551	1	0	3519	12	1008	0.203183	0.090586	2	-1		-1	0.0915341
C1_08330C_A	129.49	1.22245e+06	1	0.62	0.00191205	1	0	1047	30	2706	0.145177	0.464167	2		-1	-1	0.0915164
C4_05620C_A	32.38	1.73301e+06	0	0.15	0.0043384	0	0	462	7	483	0.87013	0.137186	8			-1	0.0913614
CR_00270C_A	28.67	6760.45	5	0.13	0.00856531	0	0	468	7	209	0.264957	0.389617	0			-1	0.0913095
C1_04570C_A	5.1	374.084	32	0.15	0.00572656	-1	-1	1398	7	21	0.373391	0.0770376	0	-1		-1	0.09125
C1_11190W_A				0.14	0.0155844	-1	-1	768	22	1324	0.191406	0.488793	2		-1	-1	0.0911924
C1_01800W_A	35.19	2179.49	32	0.15	0.0069541	0	0	720	8	507	0.805556	0.168127	18			-1	0.091
C5_00620W_A	6.18	206.088	95	0.19	0	-1	-1	612	3	80	0.686275	0.064033	5	-1		-1	0.0909091
C3_05310W_A	33.43	1092.51	5	0.24	0.00471698	0	0	3393	189	15686	0.0415561	0.350341	8			-1	0.0908333
C1_04820C_A	51.75	57165.3	178	0.19	0.00269542	-1	-1	372	8	136	0.298387	0.37696	2			-1	0.09054
CR_06270W_A	4.59	1338.44	43	0.13	0	0	0	495	5	120	0.369697	0.128879	3			-1	0.0904762
C1_13320C_A	55.94	3383.08	3	0.3	0.00464846	0	0	1722	8	231	0.339141	0.128938	0			-1	0.0904708
C1_08210C_A	47.64	3747.68	31	0.21	0.000829876	0	0	4821	139	13056	0.0508193	0.229093	29			-1	0.0904583
C5_03960W_A	132.73	129041	1	0.21	0.0128535	-1	-1	390	15	1853	0.238462	0.505087	2			-1	0.0903591
C5_04130C_A	189.26	533040	11	0.42	0.0119931	0	0	1752	42	3427	0.107306	0.368718	4	-1		-1	0.0903591
C1_10330C_A	12.12	530.603	125	0.13	0.00373134	-1	-1	1341	3	21	0.708427	0.0510148	12		-1	-1	0.09
C3_05440C_A	6.33	180.254	76	0.17	0.00620636	-1	-1	1290	18	210	0.427907	0.12041	28			-1	0.09
C6_04590C_A	29.83	258848	3	0.23	0.00268096	0	0	747	32	3946	0.222222	0.285805	30			-1	0.09
CR_05620C_A	19.62	689.416	334	0.17	0.00121507	-1	-1	1647	4	65	0.632058	0.0456502	9	-1		-1	0.09
CR_07860C_A	28.43	1561.67	19	0.16	0.00134589	-1	-1	744	2	41	0.388441	0.0298044	2	-1		-1	0.0896169
C5_04620C_A	23.69	2323.82	166	0.12	0.00226244	-1	-1	885	7	330	0.375141	0.11386	0			-1	0.0895076
CR_06420W_A	20.17	1722.42	233	0.14	0.000690608	-1	-1	1449	6	45	0.804693	0.0791549	3			-1	0.0894118
C2_07770C_A	2.59	214.899	0	0.18	0	0	0	297	4	236	0.552189	0.165587	0			-1	0.0892262
C5_01900C_A	27.57	21724.3	6	0.1	0.0182927	-1	-1	165	8	695	0.630303	0.295599	19			-1	0.0883333
CR_07820W_A				0.25	0.00228415	0	0	2187	68	6049	0.0864198	0.363881	0	-1		-1	0.0882106
C3_05190C_A	65.95	23905.7	0	0.23	0.00594354	-1	-1	1347	124	15606	0.0519673	0.527463	28			-1	0.0881759
C1_10030W_A	55.41	7907.16	367	0.25	0.00472255	-1	-1	1695	45	4881	0.146903	0.543061	6			-1	0.0880673
C1_07620C_A				0.25	0.00784929	0	0	1269	72	6361	0.0914106	0.649414	14			-1	0.0879293
C2_10690W_A	51.69	50869.1	32	0.15	0.00291734	-1	-1	3086	66	7085	0.0856481	0.140166	30			-1	0.0879175
C2_00140W_A	92.29	19757.3	10	0.28	0.001321	-1	-1	1515	8	273	0.377558	0.117062	1			-1	0.0877261
C1_12230W_A	36.46	1486.52	2	0.14	0.00199667	-1	-1	3006	16	874	0.281104	0.0883946	0			-1	0.0877
C3_02270W_A	15.74	2083.25	20	0.12	0.00446429	0	0	225	5	71	0.333333	0.210635	5			-1	0.0875
CR_06060W_A				0.1	0.00258732	0	0	768	7	527	0.242188	0.126032	12			-1	0.0869487
C1_11860W_A	78.56	3674.12	5	0.39	0.00409612	-1	-1	3663	26	1901	0.127491	0.160951	1			-1	0.0868917
C1_05700W_A	54.25	322755	265	0.26	0.00203666	-1	-1	492	10	307	0.276961	0.228158	6		-1	-1	0.0865389
C2_09140C_A	35.29	4963.22	5	0.32	0.00761267	-1	-1	3285	95	9641	0.0505327	0.301075	15			-1	0.0858333
C3_03340C_A	228.7	136593	42	0.2	0	0	0	285	8	209	0.284211	0.19069	25			-1	0.0857665
C1_01520C_A	238.89	239522	14	0.48	0.00284091	-1	-1	705	3	300	0.838298	0.0974826	3	-1		-1	0.0856944
C2_00400C_A	197.84	102692	98	0.25	0.00273598	0	0	732	6	177	0.601093	0.102676	3			-1	0.0856493
C1_00460W_A	228.71	204972	85	0.21	0	-1	-1	321	5	192	0.554517	0.266855	2			-1	0.0855985
C2_03310C_A	24.07	249553	69	0.17	0	-1	-1	651	3	198	0.482335	0.068403	7	-1		-1	0.0854167
C2_10080W_A	27.8	43478.6	32	0.13	0.00310318	0	1	1293	23	765	0.16396	0.176579	6	-1		-1	0.0853332
CR_07360W_A	21.07	1269.9	50	0.13	0.00294118	-1	-1	2721	17	610	0.404998	0.0564372	1	-1		-1	0.0852083
C3_00340W_A	57.75	18178.7	141	0.15	0	-1	-1	354	5	471	0.29661	0.208063	7		-1	-1	0.0852046
C5_02260C_A	23.71	1700.84	63	0.13	0.00283889	0	1	1410	53	3936	0.102837	0.395641	22	-1		-1	0.0851667
C3_01520C_A	95.34	30940.8	269	0.27	0.000942507	-1	-1	1062	23	2464	0.237288	0.223843	15			-1	0.085134
C7_01250W_A	1489.05	1.97843e+07	119	0.66	0.00247525	-1	-1	1213	15	354	0.159329	0.137965	1			-1	0.0850081
C3_05400C_A	7.98	192.787	0	0.13	0	0	0	330	7	178	0.557576	0.133441	8			-1	0.085
C5_01290C_A	76.08	7785.36	0	0.16	0.00135135	-1	-1	741	5	157	0.303644	0.0562618	1	-1		-1	0.0849534
C1_04300C_A	746.39	686597	0	0.69	0.00464636	-1	-1	1938	17	906	0.334365	0.188457	0			-1	0.084941
C2_04770W_A	11.09	1947.82	5	0.16	0.00513347	-1	-1	972	4	99	0.635802	0.0616677	5		-1	-1	0.0848745
C2_09310C_A	30.39	1745.9	13	0.1	0.00201207	-1	-1	498	3	174	0.773092	0.0455034	6			-1	0.084806
CR_03700C_A	9.47	1895.35	95	0.15	0.0022567	0	1	3546	31	2497	0.121545	0.167281	0		-1	-1	0.0847849
C2_03840C_A	26.98	28222.6	23	0.13	0.00420168	-1	-1	477	4	65	0.618321	0.169765	0			-1	0.0847222
C2_03130W_A	73.94	10694.4	237	0.18	0.00322581	-1	-1	621	16	1166	0.239936	0.625083	11			-1	0.0846847
C3_07310C_A	104.17	137562	5	0.3	0.00222655	-1	-1	3594	49	5527	0.109905	0.145794	2			-1	0.084624
C2_04400W_A	85.98	13532.6	33	0.19	0.000840336	0	0	1191	7	376	0.374475	0.108975	0			-1	0.0845726
CR_10790W_A	8.9	19123.6	0	0.2	0	-1	-1	1713	14	1587	0.190309	0.130908	20	-1		-1	0.0845485
C1_09260C_A	35.94	42306.9	0	0.13	0.00266193	-1	-1	1128	11	808	0.325355	0.121425	18		-1	-1	0.0844916
[truncated: 4,639 more rows]
