# Supplementary material for: Leveraging machine learning essentiality predictions and chemogenomic interactions to identify antifungal targets
Source: Nat Commun. 2021 Nov 11;12:6497. doi: 10.1038/s41467-021-26850-3 (PMC8586148; doi:10.1038/s41467-021-26850-3)
Supplement: Supplementary file 4 — Supplementary Data 2 [file 41467_2021_26850_MOESM4_ESM.xlsx]

## Sheet: GRACE_Verdict
Supplementary Dataset 2: Essentiality verdicts. Each strain was assigned a growth score from 0 (full growth) to 4 (no growth). See supplemental Fig. 1. Based on these scoring metrics, essentiality verdicts were assigned as NE (non-essential), E (essential),GD (growth defect), or N/A (no growth observed in No DOX condition).
Plate	Position	Merck Strain ID	orf19	Common	Feature Name	Description	No_DOX_score	DOX_Score	Essential_verdict
Plate 01	A01	731	orf19.5507	ENP1	C7_03700C_A	Protein required for pre-rRNA processing and 40S ribosomal subunit synthesis; associated with U3 and U14 snoRNAs; transposon mutation affects filamentous growth; repressed by prostaglandins; Spider biofilm induced	0	0	NE
Plate 01	A02	605	orf19.4194		C6_00640C_A	Putative TFIIH complex subunit; possibly an essential gene, disruptants not obtained by UAU1 method	0	4	E
Plate 01	A03	513	orf19.665	NEP1	C1_11380W_A	Ortholog(s) have protein homodimerization activity, rRNA binding activity	0	0.75	GD
Plate 01	A04	160	orf19.2884	CDC68	C4_06500W_A	Functional homolog of S. cerevisiae Cdc68, a transcription elongation factor; essential; possible drug target	0	3	E
Plate 01	A05	92	orf19.2314		C1_11000C_A	Protein with a role in nucleolar integrity and processing of pre-rRNA; mutation confers hypersensitivity to 5-fluorocytosine (5-FC), 5-fluorouracil (5-FU), and tubercidin (7-deazaadenosine); Hap43-induced; Spider biofilm induced	0	2.5	GD
Plate 01	A06	133	orf19.275		C3_02840W_A	Ortholog(s) have ribonuclease MRP activity, ribonuclease P activity, role in intronic box C/D snoRNA processing, mRNA cleavage and endoplasmic reticulum, nucleolar ribonuclease P complex, ribonuclease MRP complex localization	0	4	E
Plate 01	A07	584	orf19.1199	NOP5	C6_00370C_A	Ortholog of S. cerevisiae Nop58; involved in pre-rRNA process; Tn mutation affects filamentous growth; macrophage/pseudohyphal-induced; physically interacts with TAP-tagged Nop1; Spider biofilm repressed	0	4	E
Plate 01	A08	630	orf19.3243	SRP54	CR_01110W_A	Putative signal recognition particle (SRP) subunit; induced in ssr1 null; Spider biofilm repressed	0	2.25	GD
Plate 01	A09	651	orf19.1221	ALG2	C6_04030W_A	Putative mannosyltransferase involved in cell wall mannan biosynthesis; transcription is elevated in chk1, nik1, and sln1 homozygous null mutants	0	0	NE
Plate 01	A10	227	orf19.6217	PGA63	C1_06930W_A	Component COPII vesicle coat; required for vesicle formation in ER to Golgi transport; predicted GPI-anchor; Spider biofilm repressed	0	4	E
Plate 01	A11	765	orf19.7041		C7_00780W_A	Putative pre-tRNA processing protein; heterozygous null mutant exhibits hypersensitivity to parnafungin and cordycepin in the C. albicans fitness test	0	4	E
Plate 01	A12	772	orf19.6820		C3_06820C_A	Has domain(s) with predicted DNA binding activity, role in DNA-dependent transcription, initiation and transcription factor TFIID complex localization	0	4	E
Plate 01	B01	773	orf19.5531	CDC37	C6_02610C_A	Chaperone for Crk1p; interacts with Crk1p kinase domain and with Sti1p; putative phosphorylation site at Ser14; functional homolog of S. cerevisiae Cdc37p; likely to be essential for growth; regulated by Gcn2p and Gcn4p	0	0	NE
Plate 01	B02	780	orf19.2002		C2_01220W_A	Ortholog(s) have structural constituent of nuclear pore activity and role in nuclear pore organization, poly(A)+ mRNA export from nucleus, protein import into nucleus, ribosomal large subunit export from nucleus	0	3.5	E
Plate 01	B03	787	orf19.2712	HCA4	C4_02830C_A	Putative role in regulation of cell wall biogenesis; Hap43p-induced gene; possibly an essential gene, disruptants not obtained by UAU1 method; flow model and rat catheter biofilm induced	0	4	E
Plate 01	B04	790	orf19.7291		CR_08940W_A	Ortholog(s) have tRNA (adenine-N1-)-methyltransferase activity, role in tRNA methylation and cytosol, nucleus, tRNA (m1A) methyltransferase complex localization	0	0	NE
Plate 01	B05	850	orf19.6026	ERG2	C1_00800C_A	C-8 sterol isomerase; enzyme of ergosterol biosynthesis; converts fecosterol to episterol; mutant is hypersensitive to multiple drugs; ketoconazole-induced; Spider biofilm repressed	0	0	NE
Plate 01	B06	851	orf19.767	ERG3	C1_04770C_A	C-5 sterol desaturase; introduces C-5(6) double bond into episterol; some clinical isolates show increased azole resistance and defects in hyphal growth and virulence; Efg1p-repressed; fluconazole-induced	0	0	NE
Plate 01	B07	856	orf19.1031	HMG1	C1_03780C_A	HMG-CoA reductase; enzyme of sterol pathway; inhibited by lovastatin; gene not transcriptionally regulated in response to lovastatin and fluconazole	0	4	E
Plate 01	B08	857	orf19.6199		C1_07050C_A	Ortholog(s) have ATP-dependent 5'-3' DNA helicase activity and DNA helicase A complex, alpha DNA polymerase:primase complex, cytosol localization	0	0	NE
Plate 01	B09	767	orf19.5901	PKC1	C3_04470W_A	Protein kinase C; functional homolog of S. cerevisiae Pkc1p; mutant has abnormal yeast-form cell morphology and increased cell lysis; activated by phosphatidylserine; target of antifungal, cercosporamide; R400P mutant is activated	0	3.25	E
Plate 01	B10	278	orf19.6716	ABD1	C3_07710W_A	SAM-dependent RNA methyltransferase; methylates mRNA 5' cap; binds phosphorylated RNA Pol II C-term domain peptide; does not bind mRNA TPase and mRNA GTase (Cet1,Cgt1); functional homolog of S. cerevisiae Abd1; rat catheter biofilm induced	0.25	1	GD
Plate 01	B11	528	orf19.3001	TEM1	C1_03080C_A	Protein similar to S. cerevisiae Tem1p, which is a GTPase involved in termination of the M phase of the cell cycle; induced under Cdc5p depletion	0	0.5	GD
Plate 01	B12	620	orf19.6151	ARC15	CR_07210W_A	Putative ARP2/3 complex subunit; mutation confers hypersensitivity to cytochalasin D	0	0	NE
Plate 01	C01	659	orf19.274	TFC4	C3_02830W_A	Putative RNA polymerase III transcription initiation factor complex (TFIIIC) subunit; induced by Mnl1 under weak acid stress; possibly essential gene, disruptants not obtained by UAU1 method	0	0	NE
Plate 01	C02	353	orf19.5360	RPC11	C2_10770W_A	Putative RNA polymerase III subunit C11; repressed in core caspofungin response; Spider biofilm induced	0	1	GD
Plate 01	C03	556	orf19.759		C1_04830W_A	Ortholog(s) have role in ER to Golgi vesicle-mediated transport, retrograde vesicle-mediated transport, Golgi to ER and COPI vesicle coat, cytosol, endosome localization	0	4	E
Plate 01	C04	164	orf19.6862		C4_05230C_A	Hap43-induced gene; mutation confers hypersensitivity to 5-fluorocytosine (5-FC), 5-fluorouracil (5-FU), and tubercidin (7-deazaadenosine)	0	2	GD
Plate 01	C05	331	orf19.1815		CR_07080W_A	Ortholog of S. cerevisae/S. pombe Tif6; constituent of 66S pre-ribosomal particles; Spider biofilm induced	0	4	E
Plate 01	C06	337	orf19.5013	AGM1	C1_13760W_A	Phosphoacetylglucosamine mutase (N-acetylglucosamine-phosphate mutase); enzyme of UDP-N-acetylglucosamine (UDP-GlcNAc) biosynthesis	0	0	NE
Plate 01	C07	395	orf19.2937	PMM1	C1_02480W_A	Phosphomannomutase; enzyme of O- and N-linked mannosylation; interconverts mannose-6-phosphate and mannose-l-phosphate; functional homolog of S. cerevisiae Sec53; antigenic in murine infection; Hap43-induced; Spider biofilm repressed	0	0.5	GD
Plate 01	C08	397	orf19.7234		C1_14240W_A	Putative RSC chromatin remodeling complex component; possibly an essential gene, disruptants not obtained by UAU1 method	0	4	E
Plate 01	C09	406	orf19.5912	MAK21	C3_04560W_A	Putative 66S pre-ribosomal particle subunit; mutation confers hypersensitivity to tubercidin (7-deazaadenosine)	0.5	4	E
Plate 01	C10	409	orf19.4427	SKP1	C1_07410C_A	Putative subunit D of kinetochore protein complex CBF3; regulated by Gcn4p; repressed in response to amino acid starvation (3-aminotriazole treatment)	0	0.5	GD
Plate 01	C11	412	orf19.7119	RAD3	C7_00050C_A	Ortholog of S. cerevisiae Rad3; 5' to 3' DNA helicase, nucleotide excision repair and transcription, subunit of RNA polII initiation factor TFIIH and Nucleotide Excision Repair Factor 3 (NEF3)	0	4	E
Plate 01	C12	454	orf19.1387		C2_09670C_A	Ortholog(s) have 4 iron, 4 sulfur cluster binding activity, role in iron-sulfur cluster assembly, tRNA wobble uridine modification and cytoplasm localization	0	0	NE
Plate 01	D01	606	orf19.1975		C5_00920W_A	Ortholog(s) have role in mRNA splicing, via spliceosome, mitotic cell cycle G2/M transition checkpoint, regulation of mitotic metaphase/anaphase transition and U4/U6 x U5 tri-snRNP complex, U5 snRNP localization	0	4	E
Plate 01	D02	611	orf19.6860		C4_05210W_A	Ortholog(s) have CDP-diacylglycerol-inositol 3-phosphatidyltransferase activity, role in phosphatidylinositol biosynthetic process and Golgi apparatus, integral to membrane, mitochondrial outer membrane localization	0	0	NE
Plate 01	D03	613	orf19.2835		CR_02770C_A	Ortholog(s) have SUMO activating enzyme activity, role in protein sumoylation, regulation of mitotic cell cycle, response to DNA damage stimulus and SUMO activating enzyme complex, cytosol localization	0	0	NE
Plate 01	D04	419	orf19.3593	RPT6	C2_08780W_A	Putative ATPase of the 19S regulatory particle of the 26S proteasome; transcript regulated by Mig1; regulated by Gcn2 and Gcn4	0	4	E
Plate 01	D05	427	orf19.1295	VAS1	C2_06640C_A	Putative tRNA-Val synthetase; genes encoding ribosomal subunits, translation factors, and tRNA synthetases are downregulated upon phagocytosis by murine macrophage	0	0	NE
Plate 01	D06	645	orf19.1267.1		C4_05820W_A	Ortholog(s) have enzyme activator activity, role in iron-sulfur cluster assembly and extrinsic to mitochondrial inner membrane, mitochondrial matrix localization	0	4	E
Plate 01	D07	625	orf19.4640	PWP1	C4_01450W_A	Putative rRNA processing protein; Hap43-induced; repressed in core stress response	0	0	NE
Plate 01	D08	623	orf19.5691	CDC11	C5_00070W_A	Septin; required for wild-type cell and hyphal morphology, agar-invasive growth, full virulence and kidney tissue invasion in mouse, but not for kidney colonization, immunogenicity; phosphorylation is hyphal- and cell-cycle-regulated	1.25	2.5	E
Plate 01	D09	711	orf19.7392		C3_06100C_A	Predicted ATP-dependent RNA helicase; RNA strand annealing activity; Spider biofilm induced	0	1.5	GD
Plate 01	D10	696	orf19.4903		C1_10320W_A	Ortholog(s) have endoplasmic reticulum localization	0	0	NE
Plate 01	D11	648	orf19.2559	CDC4	CR_01680C_A	F-box subunit of SCF(CDC4) ubiquitin ligase; functional homolog of S. cerevisiae Cdc4; mutation/depletion causes hyperfilamentation; Sol1 is a substrate of SCF-Cdc4; Spider biofilm induced	0	0	NE
Plate 01	D12	600	orf19.3761	CDC54	C1_12550C_A	Putative pre-replication complex helicase subunit; transcript regulated by Nrg1 and Mig1; periodic mRNA expression, peak at cell-cycle M/G1 phase; Hap43-induced	0	4	E
Plate 01	E01	573	orf19.7064	GLN4	C7_00550C_A	Putative tRNA-Gln synthetase; genes encoding ribosomal subunits, translation factors, tRNA synthetases are downregulated upon phagocytosis by murine macrophage; protein present in exponential and stationary growth phase yeast cultures	0	3	E
Plate 01	E02	582	orf19.4815	YTM1	C1_09510W_A	Protein similar to S. cerevisiae Ytm1p, which is involved in biogenesis of the large ribosomal subunit; transposon mutation affects filamentous growth; protein level decreases in stationary phase cultures; Hap43p-induced gene	0	4	E
Plate 01	E03	514	orf19.4641	NMT1	C4_01440W_A	Myristoyl-CoA:protein N-myristoyltransferase; attaches the fatty acid myristate to a small number of proteins at an N-terminal Gly; essential; antifungal drug target; functional homolog of S. cerevisiae Nmt1p	0	0	NE
Plate 01	E04	254	orf19.3169		C5_02020C_A	Ortholog(s) have role in establishment of mitotic sister chromatid cohesion and cytosol, nucleus localization	0	1.75	GD
Plate 01	E05	361	orf19.3128		C4_06810C_A	Ortholog(s) have syntaxin binding activity and role in ER to Golgi vesicle-mediated transport, positive regulation of SNARE complex assembly, retrograde vesicle-mediated transport, Golgi to ER, vesicle fusion with Golgi apparatus	0	4	E
Plate 01	E06	291	orf19.3178		C5_01930W_A	Ortholog(s) have RNA binding activity, role in mRNA splicing, via spliceosome and U2-type prespliceosome localization	0	4	E
Plate 01	E07	429	orf19.7136	SPT6	C7_04300W_A	Putative transcription elongation factor; transposon mutation affects filamentous growth; transcript induced in an RHE model of oral candidiasis and in clinical isolates from oral candidiasis	0	0	NE
Plate 01	E08	333	orf19.1164	GAR1	C1_11550W_A	Putative H/ACA snoRNP pseudouridylase complex protein; mutation confers hypersensitivity to tubercidin (7-deazaadenosine); macrophage/pseudohyphal-induced; Spider biofilm repressed	0	1	GD
Plate 01	E09	655	orf19.122	CDC20	C6_01150W_A	Activator of anaphase-promoting complex/cyclosome; induced under Cdc5 depletion; member of conserved Mcm1 regulon; mRNA expression peaks at cell-cycle G2/M phase; mRNA binds She3 and is localized to buds of yeast cells and to hyphal tips	0	1.5	GD
Plate 01	E10	442	orf19.1304		C4_03740W_A	Ortholog(s) have role in U4 snRNA 3'-end processing, exonucleolytic trimming to generate mature 3'-end of 5.8S rRNA from tricistronic rRNA transcript (SSU-rRNA, 5.8S rRNA and LSU-rRNA), more	2	1	GD
Plate 01	E11	485	orf19.4851	TFA1	C1_09860C_A	Protein with polyglutamate motifs and abundant Ser/Thr residues; described as a subunit of TFIIE, which is a basal transcription initiation factor of RNA Polymerase II; possibly an essential gene, disruptants not obtained by UAU1 method	0	4	E
Plate 01	E12	487	orf19.107	SNT11	C6_01040C_A	DEAH-box ATP-dependent RNA helicase, required for 18S rRNA synthesis; rat catheter biofilm induced	0	0	NE
Plate 01	F01	48	orf19.7101		C7_00210C_A	Ortholog(s) have telomeric DNA binding activity, role in protein localization to chromosome, telomere maintenance via telomerase and ASTRA complex, nuclear telomere cap complex localization	0	0	NE
Plate 01	F02	193	orf19.2847		CR_02890C_A	Ortholog(s) have DNA-directed RNA polymerase activity, role in tRNA transcription from RNA polymerase III promoter and DNA-directed RNA polymerase III complex, spindle pole body localization	0	1.25	GD
Plate 01	F03	60	orf19.542.2	MIM1	CR_04520W_A	Predicted mitochondrial protein involved in outer membrane protein import	0	3	E
Plate 01	F04	100	orf19.3366	CSH3	C4_03390W_A	Functional homolog of S. cerevisiae Shr3p, which is a chaperone specific for amino acid permeases; localized to ER; required for wild-type amino-acid responsive hyphal growth and for mouse systemic virulence; regulated by Gcn2p and Gcn4p	0	0	NE
Plate 01	F05	112	orf19.4388		CR_03460W_A	Protein with a histone fold domain; similar to TAFII47 proteins from S. cerevisiae, Danio rerio, Drosophila melanogaster, human, and mouse	0	0.5	GD
Plate 01	F06	330	orf19.6025		C1_00810W_A	Ortholog(s) have N-acetylglucosaminyldiphosphodolichol N-acetylglucosaminyltransferase activity and role in dolichol-linked oligosaccharide biosynthetic process	0	0	NE
Plate 01	F07	583	orf19.6014	RRS1	C1_00900W_A	Putative ribosome biogenesis and nuclear export protein; Hap43p-induced gene; mutation confers hypersensitivity to 5-fluorocytosine (5-FC), 5-fluorouracil (5-FU), and tubercidin (7-deazaadenosine)	0	4	E
Plate 01	F08	589	orf19.4382		CR_03600C_A	Ortholog(s) have role in retrograde vesicle-mediated transport, Golgi to ER and COPI vesicle coat, cytosol, nucleus localization	0	4	E
Plate 01	F09	817	orf19.2504	BMS1	C3_01000W_A	Putative GTPase; Hap43-induced gene; mutation confers resistance to 5-fluorocytosine (5-FC); flucytosine induced; repressed by prostaglandins; Spider biofilm induced	0	4	E
Plate 01	F10	814	orf19.1591	ERG10	C2_04310W_A	Acetyl-CoA acetyltransferase; role in ergosterol biosynthesis; soluble in hyphae; changes in protein abundance associated with azole resistance; fluconazole or ketoconazole induced; macrophage-downregulated protein; GlcNAc-induced protein	0	1.25	GD
Plate 01	F11	824	orf19.2365	POL2	CR_07000C_A	DNA polymerase epsilon; transcript induced by interaction with macrophage; transcript is regulated by Tup1; periodic mRNA expression, peak at cell-cycle G1/S phase	0	0.5	GD
Plate 01	F12	829	orf19.7384	NOG1	C3_06030W_A	Putative GTPase; mutation confers hypersensitivity to 5-fluorocytosine (5-FC), 5-fluorouracil (5-FU), and tubercidin (7-deazaadenosine); repressed by prostaglandins; Hap43-induced	0	4	E
Plate 01	G01	838	orf19.3129		C4_06800W_A	Putative chromatin remodelling complex protein; heterozygous null mutant displays sensitivity to virgineone; Spider biofilm repressed	0	4	E
Plate 01	G02	834	orf19.4192	CDC14	C6_00670W_A	Protein involved in exit from mitosis and morphogenesis; ortholog of S. cerevisiae Cdc14p, which is a dual-specificity phosphatase and cell-cycle regulator; suppresses S. cerevisiae cdc15-lyt1, dbf2-2, and (partially) tem1 mutant phenotypes	0	4	E
Plate 01	G03	830	orf19.1738	UGP1	CR_04660C_A	UTP-glucose-1-phosphaturidyl transferase; localizes to yeast, not hyphal cell surface; Hog1-repressed; stationary phase enriched; induced in oralpharyngeal candidasis; rat catheter biofilm repressed; Bcr1-repressed in RPMI a/a biofilms	0	4	E
Plate 01	G04	837	orf19.2216	PDS5	C2_07660W_A	Putative protein with a predicted role in establishment and maintenance of sister chromatid condensation and cohesion; cell-cycle regulated periodic mRNA expression	0	0	NE
Plate 01	G05	122	orf19.7413	MMS21	C3_06200C_A	Putative MMS21-SMC5-SMC6 complex component	0	0	NE
Plate 01	G06	362	orf19.4005		C5_05130C_A	Putative dephospho-CoA kinase; protein likely to be essential for growth, based on an insertional mutagenesis strategy	0	0	NE
Plate 01	G07	852	orf19.5379	ERG4	C3_00760W_A	Protein similar to sterol C-24 reductase; shows Mob2p-dependent hyphal regulation; fluconazole-induced; caspofungin repressed; rat catheter biofilm repressed	1.5	1	GD
Plate 01	G08	94	orf19.4089	SGT1	C2_09270C_A	Putative co-chaperone protein with a predicted role in kinetochore assembly; mutation confers hypersensitivity to radicicol; sumoylation target	0	3.5	E
Plate 01	G09	447	orf19.7255	RPC10	C1_14390W_A	Putative RNA polymerase subunit ABC10-alpha of RNA polymerase complexes I, II, and III; flucytosine induced; Spider biofilm induced	0	4	E
Plate 01	G10	768	orf19.6345	RPG1A	C1_12770W_A	Putative translation initiation factor; mutation confers hypersensitivity to roridin A and verrucarin A; repressed upon phagocytosis by murine macrophage; Spider biofilm repressed	0	4	E
Plate 01	G11	769	orf19.4616	POL30	C4_01770W_A	Similar to proliferating cell nuclear antigen (PCNA); RNA abundance regulated by tyrosol, cell density; induced by flucytosine, interaction with macrophages; stationary phase enriched protein; rat catheter and Spider biofilm repressed	0	3.75	E
Plate 01	G12	770	orf19.1672		C3_01720C_A	Ortholog(s) have ubiquitin binding activity, role in ER to Golgi vesicle-mediated transport, retrograde vesicle-mediated transport, Golgi to ER and COPI vesicle coat localization	0	4	E
Plate 01	H01	782	orf19.4987	NUP49	C1_13550C_A	Nuclear pore protein	0	0.5	GD
Plate 01	H02	786	orf19.6099	CCT8	C1_00110W_A	Chaperonin-containing T-complex subunit; role in hyphal morphogenesis, particularly starvation-induced; essential; expression in S. cerevisiae inhibits Ras2-mediated pathways; CCT8 and TRP1 overlap; Spider biofilm repressed	0	3.5	E
Plate 01	H03	791	orf19.6422	SSY5	CR_08540C_A	Ortholog(s) have serine-type endopeptidase activity, role in protein processing, response to amino acid stimulus and extrinsic to plasma membrane localization	0	0	NE
Plate 01	H04	854	orf19.1631	ERG6	C3_02150C_A	Delta(24)-sterol C-methyltransferase, converts zymosterol to fecosterol, ergosterol biosynthesis; mutation confers nystatin resistance; Hap43, GlcNAc-, fluconazole-induced; upregulated in azole-resistant strain; Spider biofilm repressed	0	1	GD
Plate 01	H05	864	orf19.4346		C5_03140C_A	Ortholog(s) have protein anchor activity, role in COPII vesicle coating and ER to Golgi transport vesicle membrane localization	0	2.5	GD
Plate 01	H06	792	orf19.1915	MPP10	C2_00070C_A	Putative SSU processome and 90S preribosome component; repressed in core stress response; repressed by prostaglandins	0	4	E
Plate 01	H07	872	orf19.6171		C3_07780C_A	Ortholog(s) have adenyl-nucleotide exchange factor activity, nucleocytoplasmic transporter activity	0	4	E
Plate 01	H08	873	orf19.2116	NAT2	C2_00160C_A	Putative N-terminal acetyltransferase; Hap43p-repressed gene; mutation confers hypersensitivity to toxic ergosterol analog	0	0	NE
Plate 01	H09	876	orf19.4435		C1_07360W_A	Ortholog(s) have structural constituent of cytoskeleton activity, role in microtubule nucleation and spindle pole body localization	0	1	GD
Plate 01	H10	877	orf19.4377	KRE1	CR_03790C_A	Cell wall glycoprotein; beta glucan synthesis; increases glucan content in S. cerevisiae kre1, complements killer toxin sensitivity; caspofungin induced; Spider/rat catheter/flow model biofilm induced; Bcr1-repressed in RPMI a/a biofilms	0.5	0	NE
Plate 01	H11	879	orf19.7363	KRE6	C3_05830W_A	Essential beta-1,6-glucan synthase subunit; change in mRNA length, not abundance, at yeast-hypha transition; alkaline induced by Rim101, on cell wall regeneration; Spider biofilm induced; Bcr1-repressed in RPMI a/a biofilms	0	0	NE
Plate 01	H12	880	orf19.5861	KRE9	C3_04180W_A	Protein of beta-1,6-glucan biosynthesis; required for serum-induced hyphal growth; required for efficient utilization of galactose and for growth on glucose; similar to S. cerevisiae Kre9p and Knh1p; O-glycosylated by Pmt1p	0	0	NE
Plate 02	A01	881	orf19.1607	ALR1	C3_02370C_A	Putative transporter of divalent cations; hyphal-induced expression; rat catheter biofilm induced	0	0.25	GD
Plate 02	A02	809	orf19.5221		C1_12430W_A	Ortholog(s) have phosphatidylinositol-4,5-bisphosphate binding activity	0	0	NE
Plate 02	A03	800	orf19.5093		C1_08160W_A	Ortholog(s) have DNA translocase activity	0	2.5	GD
Plate 02	A04	805	orf19.1077	ATM1	C6_04210C_A	Member of MDR subfamily of ABC family; ortholog of S. cerevisiae ABC transporter, Atm1; induced in low iron; induced by nitric oxide independent of Yhb1	0	0	NE
Plate 02	A05	832	orf19.3341		C1_01530C_A	Putative tRNA-Arg synthetase; essential; genes encoding ribosomal subunits, translation factors, and tRNA synthetases are downregulated upon phagocytosis by murine macrophage; downregulated by growth in the mouse cecum	0	4	E
Plate 02	A06	802	orf19.6818		C3_06830C_A	Ortholog(s) have cytosol, mitochondrion localization	0	0	NE
Plate 02	A07	827	orf19.418	KOG1	C1_05460W_A	Putative TORC1 subunit; heterozygous null mutant displays sensitivity to rapamycin; likely to be essential for growth, based on an insertional mutagenesis strategy	0	4	E
Plate 02	A08	844	orf19.6356		C1_12670C_A	Ortholog(s) have role in mRNA splicing, via spliceosome and U4/U6 x U5 tri-snRNP complex localization	0	0	NE
Plate 02	A09	449	orf19.1192	DNA2	C6_00320C_A	Protein similar to S. cerevisiae Dna2p, which is a DNA replication factor involved in DNA repair; induced under hydroxyurea treatment	0	1.5	GD
Plate 02	A10	445	orf19.878	NBN1	C2_03430W_A	Subunit of the NuA4 histone acetyltransferase complex; Plc1p-regulated	0	0	NE
Plate 02	A11	482	orf19.4336	RPS5	C5_03070W_A	Ribosomal protein S5; macrophage/pseudohyphal-induced after 16 h; downregulated upon phagocytosis by murine macrophage; Hap43-induced; Spider biofilm repressed	0	4	E
Plate 02	A12	821	orf19.7655	RPO21	CR_10680W_A	Protein similar to S. cerevisiae Rpo21p, RNA polymerase II; transposon mutation affects filamentous growth	0	4	E
Plate 02	B01	771	orf19.6074	HBR1	C1_00340W_A	Essential protein involved in regulation of MTL gene expression; hemoglobin-regulated inhibitor of white-opaque switching, may affect survival in host; activator of MTLalpha1 and MTLalpha2; transcript activated by hemoglobin	0	0	NE
Plate 02	B02	775	orf19.6925	HTB1	C3_03900C_A	Histone H2B; induced by adherence to polystyrene; amphotericin B, caspofungin repressed; flucytosine, fluconazole induced; Efg1 regulated; slow growth, increased white-to opaque switch in ectopic expression strains; Spider biofilm repressed	0	0	NE
Plate 02	B03	776	orf19.2760		C4_02430W_A	Putative mRNA cleavage and polyadenylation factor; heterozygous null mutant exhibits hypersensitivity to parnafungin and cordycepin in the C. albicans fitness test	0	4	E
Plate 02	B04	778	orf19.5577		C6_02980C_A	Putative pantothenate kinase; ortholog of S. cerevisiae Cab1; transposon mutation affects filamentous growth; repressed in core stress response	0	0.875	GD
Plate 02	B05	783	orf19.3955	MES1	C5_04700C_A	Cytoplasmic methionyl-tRNA synthetase; zinc-binding motif; ribosomal subunits, translation factors, tRNA synthetases are downregulated upon phagocytosis by murine macrophage; protein present in exponential and stationary phase yeast	0	4	E
Plate 02	B06	785	orf19.4956	RPN1	C1_13300C_A	Putative 19S regulatory particle of the 26S proteasome; regulated by Gcn2p and Gcn4p	0.5	4	E
Plate 02	B07	846	orf19.2778		C1_07660W_A	Protein of unknown function; transcript is upregulated in clinical isolates from HIV+ patients with oral candidiasis	0	2	GD
Plate 02	B08	847	orf19.3301		C1_01130W_A	Putative ubiquitin ligase complex component; induced by heavy metal (cadmium) stress; Hog1-induced; transcript induced by Mnl1p under weak acid stress; flow model biofilm induced; Spider biofilm induced	0	0	NE
Plate 02	B09	848	orf19.6559		C7_01650W_A	RNA polymerase III transcription initiation factor complex (TFIIIC) subunit; growth phase regulated protein; downregulaated in stationary phase yeast cultures; Hap43-repressed; flow model biofilm induced; Spider biofilm repressed	0	0	NE
Plate 02	B10	853	orf19.5178	ERG5	C7_02840C_A	Putative C-22 sterol desaturase; fungal C-22 sterol desaturases are cytochrome P450 enzymes of ergosterol biosynthesis, catalyze formation of the C-22(23) double bond in the sterol side chain; transposon mutation affects filamentous growth	0.5	0	NE
Plate 02	B11	862	orf19.1649	RNA1	C3_01990W_A	Putative GTPase-activating protein; protein level decreases in stationary phase cultures; Spider biofilm repressed	0	4	E
Plate 02	B12	866	orf19.3996		C5_05040W_A	Putative mannosyltransferase; similar to S. cerevisiae Gpi10p; has HKEXRF motif	0	0	NE
Plate 02	C01	788	orf19.5143	TIM54	C7_03120W_A	Predicted component of the mitochondrial TIM22 complex; involved in protein import into mitochondrial inner membrane; Spider biofilm repressed	0	1	GD
Plate 02	C02	870	orf19.4015	CAG1	C5_05220W_A	Alpha subunit of heterotrimeric G protein; positive role in mating pheromone response; opaque-enriched transcript; transcript repressed by MTLa1p-MTLalpha2p complex; regulated by hemoglobin-responsive Hbr1 via MTL genes	0.5	0	NE
Plate 02	C03	784	orf19.6294	MYO1	C5_01650C_A	Component of actomyosin ring at neck of newly-emerged bud	0	0	NE
Plate 02	C04	855	orf19.1598	ERG24	C2_09400C_A	C-14 sterol reductase, has a role in ergosterol biosynthesis; mutation confers increased sensitivity to dyclonine; rat catheter and Spider biofilm repressed	0.5	0	NE
Plate 02	C05	806	orf19.2873	TOP2	C4_06600W_A	DNA topoisomerase II; catalyzes ATP-dependent DNA relaxation and decatenation in vitro; Y842 predicted to be catalytic; functional homolog of S. cerevisiae Top2p; sensitive to amsacrine or doxorubicin; farnesol-upregulated in biofilm	0	0.5	GD
Plate 02	C06	807	orf19.4451	RIA1	C1_07140C_A	Putative translation elongation factor; genes encoding ribosomal subunits, translation factors, and tRNA synthetases are downregulated upon phagocytosis by murine macrophage	0	1.75	GD
Plate 02	C07	812	orf19.1110		C5_03840W_A	Thiamine pyrophosphokinase, phosphorylates thiamine to produce the coenzyme thiamine pyrophosphate (thiamine diphosphate); active as a homodimer	0	0	NE
Plate 02	C08	808	orf19.3704		CR_07750C_A	Ortholog(s) have role in maturation of 5.8S rRNA from tricistronic rRNA transcript (SSU-rRNA, 5.8S rRNA, LSU-rRNA), maturation of LSU-rRNA from tricistronic rRNA transcript (SSU-rRNA, 5.8S rRNA, LSU-rRNA)	0	3.25	E
Plate 02	C09	804	orf19.3796	DCR1	C4_04830W_A	Putative Dicer RNAse involved in RNA interference, similar to S. cerevisiae Rnt1p but orthologous to S. castellii Dcr1p, which is not conserved in S. cerevisiae	0.25	1.5	GD
Plate 02	C10	826	orf19.5991		C3_05160C_A	Ortholog(s) have role in maturation of 5.8S rRNA from tricistronic rRNA transcript (SSU-rRNA, 5.8S rRNA, LSU-rRNA), maturation of LSU-rRNA from tricistronic rRNA transcript (SSU-rRNA, 5.8S rRNA, LSU-rRNA)	0	3.25	E
Plate 02	C11	779	orf19.7529	EPL1	CR_00100C_A	Subunit of the NuA4 histone acetyltransferase complex	0	4	E
Plate 02	C12	1233	orf19.3177		C5_01940W_A	Ortholog(s) have 2,5-diamino-6-ribitylamino-4(3H)-pyrimidinone 5'-phosphate deaminase activity, pseudouridine synthase activity, role in riboflavin biosynthetic process, tRNA pseudouridine synthesis and cytosol localization	0	2.25	E
Plate 02	D01	1224	orf19.2330		C1_10880W_A	Putative U3 snoRNA-associated protein; Hap43-induced; transposon mutation affects filamentous growth; repressed by prostaglandins	0	4	E
Plate 02	D02	1232	orf19.5608		C6_03210C_A	RNA polymerase III subunit; Spider biofilm induced	0	4	E
Plate 02	D03	1225	orf19.5650	PRO3	C4_00240C_A	Delta 1-pyrroline-5-carboxylate reductase; protein induced during the mating process; alkaline induced; stationary phase enriched protein; Spider biofilm repressed	0	3	E
Plate 02	D04	753	orf19.586	ERV46	C5_00830C_A	Putative ER-derived vesicle protein; COPII-coated vesicle complex subunit; transcript induced by filamentous growth; Spider biofilm repressed	0	0	NE
Plate 02	D05	631	orf19.5825	NCB2	C2_02810C_A	Beta subunit of NC2, heterodimeric regulator of transcription; activates CDR1 transcription; possibly an essential gene, disruptants not obtained by UAU1 method; conditional mutants show decreased susceptibility to azoles	1	0	NE
Plate 02	D06	284	orf19.7081	SPL1	C7_00390W_A	Protein similar to S. cerevisiae Spl1p, which is involved in tRNA splicing; member of pyridoxal-phosphate-dependent aminotransferase protein family; predicted to be essential	0	4	E
Plate 02	D07	127	orf19.4258		C5_02480W_A	Puttaive pre-mRNA polyadenylation factor; heterozygous null mutant exhibits hypersensitivity to parnafungin and cordycepin in the C. albicans fitness test	0	0	NE
Plate 02	D08	595	orf19.6541	RPL5	C7_01790C_A	Ribosomal protein; repressed upon phagocytosis by murine macrophages; Hap43-induced; Spider biofilm repressed	0.5	4	E
Plate 02	D09	326	orf19.5465		C3_00100W_A	Ortholog(s) have first spliceosomal transesterification activity, role in generation of catalytic spliceosome for first transesterification step and U2-type catalytic step 1 spliceosome, spindle pole body localization	0	0	NE
Plate 02	D10	797	orf19.3087	UBI3	C4_07180W_A	Fusion of ubiquitin with the S34 protein of the small ribosomal subunit; mRNA decreases upon heat shock, appears to be degraded; functional homolog of S. cerevisiae RPS31; Hap43-induced; Spider biofilm repressed	0	4	E
Plate 02	D11	744	orf19.5693		C5_00040C_A	Subunit of the GPI (glycosylphosphatidylinositol):protein transamidase complex; removes the GPI-anchor signal and attaches GPI to proteins in the ER; Spider biofilm repressed	0	4	E
Plate 02	D12	749	orf19.2013	KAR2	C2_01120W_A	Similar to Hsp70 family chaperones; role in translocation of proteins into the ER; induced in high iron; protein present in exponential and stationary growth phase yeast cultures; Spider biofilm repressed	0	4	E
Plate 02	E01	735	orf19.2029	RFC5	C2_00950C_A	Putative heteropentameric replication factor C subunit; periodic mRNA expression, peak at cell-cycle G1/S phase	0	1	GD
Plate 02	E02	763	orf19.2084	CDH1	C2_00450C_A	Protein involved in regulation of mitosis; similar to S. cerevisiae Cdh1, which is an APC/C component; transcriptionally induced by Mnl1 under weak acid stress	0	0	NE
Plate 02	E03	833	orf19.1229		C1_07690C_A	Ortholog(s) have importin-alpha export receptor activity, role in cell division, protein export from nucleus and nuclear membrane localization	0	4	E
Plate 02	E04	754	orf19.5188	CHS1	C7_02770W_A	Chitin synthase; essential; for primary septum synthesis in yeast and hyphae; 1 of several chitin synthases; enzymatically activated by proteolytic processing; complements defects of S. cerevisiae chs1 or chs2; Spider biofilm repressed	0	4	E
Plate 02	E05	496	orf19.2407	DPS1-1	CR_03170W_A	Putative tRNA-Asp synthetase; genes encoding ribosomal subunits, translation factors, tRNA synthetases are downregulated upon phagocytosis by murine macrophage; protein enriched in stationary phase yeast cultures	0	3.5	E
Plate 02	E06	839	orf19.5597	POL5	C6_03120W_A	Putative DNA Polymerase phi; F-12/CO2 early biofilm induced	0	3	E
Plate 02	E07	825	orf19.5148	CYR1	C7_03070C_A	Class III adenylyl cyclase; mutant lacks cAMP; mutant hyphal growth defect rescued by exogenous cAMP; required for mouse mucosal or systemic infection; role in macrophage sensitivity, apoptosis; downstream of Ras1p and CO2 signaling	0	0	NE
Plate 02	E08	757	orf19.3859		CR_06070W_A	Putative microsomal beta-keto-reductase; transcript upregulated by treatment with ciclopirox olamine; induced by alpha pheromone in SpiderM medium; regulated by Sef1, Sfu1, and Hap43	0	0	NE
Plate 02	E09	750	orf19.2215	GLE1	C2_07670C_A	Putative nucleoporin; moderately induced at 42 degrees C	0	4	E
Plate 02	E10	801	orf19.6568	SMC6	C7_01580W_A	Putative structural maintenance of chromosomes (SMC) protein; Hap43-induced; cell-cycle regulated periodic mRNA expression; S. cerevisiae ortholog not cell-cycle regulated; Spider biofilm induced	0	1	GD
Plate 02	E11	357	orf19.6828		C3_06760W_A	Ortholog(s) have role in rRNA processing and nucleolus, preribosome, large subunit precursor localization	0	0	NE
Plate 02	E12	607	orf19.2233	PRE2	C2_06820C_A	Putative proteasome beta-5 subunit; macrophage-induced protein	0	4	E
Plate 02	F01	748	orf19.6213	SUI2	C1_06960W_A	Translation initiation factor eIF2, alpha chain; genes encoding ribosomal subunits, translation factors, and tRNA synthetases are downregulated upon phagocytosis by murine macrophage; stationary phase enriched protein	0	4	E
Plate 02	F02	762	orf19.5779	RNR1	C2_03160C_A	Ribonucleotide reductase large subunit; induced in low iron; transposon mutation affects filamentous growth; farnesol upregulated in biofilm; regulated by cell cycle, tyrosol, cell density; regulated by Sef1, Sfu1, and Hap43	0	4	E
Plate 02	F03	756	orf19.6640	TPS1	CR_05720W_A	Trehalose-6-phosphate synthase; role in hyphal growth and virulence in mouse systemic infection; induced in presence of human neutrophils; macrophage/pseudohyphal-repressed after 16h; stationary phase enriched protein; Hap43-repressed	0	0	NE
Plate 02	F04	434	orf19.709	PUP2	CR_06750C_A	Alpha5 subunit of the 20S proteasome; macrophage/pseudohyphal-repressed; regulated by Gcn2p and Gcn4p; protein present in exponential and stationary growth phase yeast cultures	0	4	E
Plate 02	F05	526	orf19.6432		CR_08590W_A	Ortholog(s) have ATPase activity, role in response to drug, ribosomal large subunit biogenesis and cytosol, preribosome, large subunit precursor localization	0	2.5	GD
Plate 02	F06	810	orf19.5226	WRS1	C1_12380C_A	Putative tRNA-Trp synthetase; genes encoding ribosomal subunits, translation factors, tRNA synthetases are downregulated upon phagocytosis by murine macrophages	0	4	E
Plate 02	F07	793	orf19.819		C2_04030C_A	Ortholog(s) have role in lipoate biosynthetic process and mitochondrion localization	0	1	GD
Plate 02	F08	831	orf19.2629		C4_05280W_A	Ortholog(s) have role in ER to Golgi vesicle-mediated transport, Golgi vesicle docking, SNARE complex assembly and ER to Golgi transport vesicle membrane, Golgi membrane localization	0	1	GD
Plate 02	F09	823	orf19.4697	MDN1	C4_00970C_A	Putative midasin, a very large dynein-related AAA-type ATPase; induced during the mating process	0	0	NE
Plate 02	F10	741	orf19.3696	TOM22	C7_02680W_A	Putative mitochondrial import receptor subunit; colony morphology-related gene regulation by Ssn6	0	3	E
Plate 02	F11	798	orf19.3130		C4_06790W_A	Ortholog of S. cerevisiae Gpn3 a GTPase with a role in biogenesis of RNA pol II and polIII; possibly an essential gene, disruptants not obtained by UAU1 method	0	4	E
Plate 02	F12	647	orf19.3098		C4_07100C_A	Predicted RNA-dependent ATPase RNA helicase; Hap43-induced gene	0	4	E
Plate 02	G01	543	orf19.6438		CR_08640C_A	Ortholog(s) have serine C-palmitoyltransferase activity, role in sphingolipid biosynthetic process and SPOTS complex localization	0	1.25	GD
Plate 02	G02	558	orf19.6105	MVD	C1_00070W_A	Mevalonate diphosphate decarboxylase; functional homolog of S. cerevisiae Erg19; possible drug target; transcript regulated by carbon source, yeast-hypha switch, growth phase, antifungals; gene has intron; Spider biofilm repressed	0.5	4	E
Plate 02	G03	581	orf19.3168	RPN8	C5_02030W_A	Putative regulatory subunit of the 26S proteasome; mutation confers hypersensitivity to amphotericin B; regulated by Mig1, Gcn2 and Gcn4; Spider biofilm repressed	0	4	E
Plate 02	G04	224	orf19.2761		C4_02420C_A	Putative glycosylphosphatidylinositol (GPI) anchor assembly protein; transposon insertion causes decreased colony wrinkling but does not block true hyphal growth; induced by nitric oxide independent of Yhb1p	0	0	NE
Plate 02	G05	686	orf19.5487	CDC46	C2_06250C_A	Putative hexameric MCM complex subunit; predicted role in control of cell division; periodic mRNA expression. peak at cell-cycle M/G1 phase; regulated by tyrosol, cell density, Plc1; repressed by alpha pheromone in SpiderM medium	0	4	E
Plate 02	G06	699	orf19.4635	NIP1	C4_01490W_A	Putative translation initiation factor; mutation confers hypersensitivity to roridin A and verrucarin A; genes encoding ribosomal subunits, translation factors, and tRNA synthetases are downregulated upon phagocytosis by murine macrophage	0	4	E
Plate 02	G07	815	orf19.6936	RAD53	C3_03810W_A	Protein involved in regulation of DNA-damage-induced filamentous growth; putative component of cell cycle checkpoint; ortholog of S. cerevisiae Rad53p, protein kinase required for cell-cycle arrest in response to DNA damage	0.25	1	GD
Plate 02	G08	319	orf19.2369		CR_06960W_A	Ortholog(s) have ATP binding, DNA replication origin binding activity	0	1.5	GD
Plate 02	G09	703	orf19.2404		CR_03200C_A	Ortholog(s) have ribonuclease MRP activity, ribonuclease P activity, role in intronic box C/D snoRNA processing, mRNA cleavage, rRNA processing, tRNA processing and nucleolar ribonuclease P complex localization	0	4	E
Plate 02	G10	742	orf19.941	SEC14	C5_00480C_A	Essential protein; functional homolog of S. cerevisiae Sec14p, a Golgi phosphatidylinositol/phosphatidylcholine transfer protein that regulates choline-phosphate cytidyltransferase and thereby affects secretion; biofilm-regulated	0	0.25	GD
Plate 02	G11	819	orf19.1902	NOC4	C2_07340W_A	Putative nucleolar protein; Hap43-induced; mutation confers resistance to 5-fluorocytosine (5-FC), 5-fluorouracil (5-FU), and tubercidin (7-deazaadenosine); Spider biofilm induced	0	4	E
Plate 02	G12	820	orf19.4746	JIP5	C1_08870C_A	Ortholog of S. cerevisiae Jip5; predicted role in biogenesis of the large ribosomal subunit; repressed in core stress response; Hap43-induced gene	0	0	NE
Plate 02	H01	747	orf19.7035	RFC2	C7_00820W_A	Putative heteropentameric replication factor C subunit; periodic mRNA expression, peak at cell-cycle G1/S phase	0	0	NE
Plate 02	H02	32	orf19.2313		C1_11010C_A	Putative ortholog of S. cerevisiae Pex32 a peroxisomal integral membrane protein with a role in negative regulation of peroxisome size; Hap43-repressed gene	0	0	NE
Plate 02	H03	25	orf19.3447		C6_01370W_A	Ortholog(s) have mannosyltransferase activity, role in ER-associated protein catabolic process, GPI anchor biosynthetic process, protein processing and endoplasmic reticulum localization	0	0	NE
Plate 02	H04	396	orf19.7264		C1_14460W_A	Metalloprotease subunit of the 19S regulatory particle of the 26S proteasome lid; couples the deubiquitination and degradation of proteasome substrates; role in fission of mitochondria and peroxisome; Spider biofilm repressed	0	4	E
Plate 02	H05	472	orf19.4491	ERG20	C2_04580W_A	Putative farnesyl pyrophosphate synthetase involved in isoprenoid and sterol biosynthesis, based on similarity to S. cerevisiae Erg20p; likely to be essential for growth, based on an insertional mutagenesis strategy	0	4	E
Plate 02	H06	175	orf19.5765		C6_03900W_A	Linker nucleoporin of the nuclear pore complex; role in mRNA andexport from nucleus, protein import into nucleus, ribosomal large subunit export from nucleus, ribosomal small subunit export from nucleus; rat catheter biofilm repressed	0	4	E
Plate 02	H07	398	orf19.4230		C5_02230W_A	20S proteasome subunit (beta7); protein present in exponential and stationary growth phase yeast cultures	0	4	E
Plate 02	H08	845	orf19.3055	MED17	C1_03530W_A	Putative RNA polymerase II mediator complex subunit; possibly an essential gene, disruptants not obtained by UAU1 method	0	3.5	E
Plate 02	H09	169	orf19.5163	SFI1	C7_02980C_A	Putative centrin-binding protein; predicted role in spindle pole body duplication; induced by alpha pheromone in SpiderM medium; essential for growth	0	4	E
Plate 02	H10	588	orf19.1839	RPA190	C1_10670C_A	Putative RNA polymerase I subunit A190; Hap43p-induced gene; flucytosine induced	0	4	E
Plate 02	H11	587	orf19.5746	ALA1	C6_03720W_A	Alanyl-tRNA synthetase; translational regulation generates cytoplasmic and mitochondrial forms; Gcn4p-regulated; repressed by amino acid starvation (3-AT); translation-related genes downregulated upon phagocytosis by murine macrophages	0	4	E
Plate 02	H12	67	orf19.6942	ORC3	C3_03750C_A	Protein similar to S. cerevisiae Orc3p, which is a component of the origin recognition complex involved in DNA replication; mutation confers hypersensitivity to toxic ergosterol analog; induced under hydroxyurea treatment	0	3	E
Plate 03	A01	287	orf19.3651	PGK1	C6_00750C_A	Phosphoglycerate kinase; localizes to cell wall and cytoplasm; antigenic in murine/human infection; flow model biofilm, Hog1-, Hap43-, GCN-induced; repressed upon phagocytosis; repressed in Spider biofilms by Bcr1, Ndt80, Rob1, Brg1	0	1	GD
Plate 03	A02	221	orf19.2260		C2_07040W_A	Putative transcription factor with zinc finger DNA-binding motif	0	0.5	GD
Plate 03	A03	751	orf19.3561	CDC7	C2_05320W_A	Putative kinase; cell-cycle regulated periodic mRNA expression; S. cerevisiae ortholog is not cell-cycle regulated; possibly an essential gene, disruptants not obtained by UAU1 method	0	1.25	GD
Plate 03	A04	836	orf19.6046	APC1	C1_00600W_A	Putative Anaphase-Promoting Complex/Cyclosome subunit; essential for growth; periodic mRNA expression, peak at cell-cycle S/G2 phase	0	1.5	GD
Plate 03	A05	841	orf19.3058		C1_03550C_A	Ortholog(s) have role in ubiquinone biosynthetic process and mitochondrial inner membrane localization	0	0	NE
Plate 03	A06	740	orf19.4585	TFG1	C4_02060C_A	Protein similar to S. cerevisiae Tfg1p, which is part of transcription factor TFIIF; transposon mutation affects filamentous growth; possibly an essential gene, disruptants not obtained by UAU1 method	0	4	E
Plate 03	A07	759	orf19.6075		C1_00330C_A	Putative CCR4-Not complex transcription factor; ortholog of S. cerevisiae Cdc36; Hap43-repressed gene	0	0	NE
Plate 03	A08	818	orf19.7062	RPA135	C7_00570W_A	Putative RNA polymerase I subunit A135; repressed by prostaglandins	0	4	E
Plate 03	A09	760	orf19.3265	TRM1	CR_00900W_A	Putative N2,N2-dimethylguanine tRNA methyltransferase; induced upon adherence to polystyrene	0	0	NE
Plate 03	A10	822	orf19.3451	TRA1	C6_01320W_A	Subunit of the NuA4 histone acetyltransferase complex	0	0	NE
Plate 03	A11	835	orf19.6926	CSC25	C3_03890W_A	Guanyl-nucleotide exchange factor; activator of Ras/adenylyl cyclase pathway; functional homolog of S. cerevisiae Cdc25p; commonly called Cdc25; transposon mutation affects filamentous growth	0	0	NE
Plate 03	A12	816	orf19.5516		C6_02470W_A	Ortholog(s) have signal sequence binding activity, role in protein targeting to ER and cytosol, nucleus, signal recognition particle, endoplasmic reticulum targeting localization	0	2.5	GD
Plate 03	B01	189	orf19.1232	VRG4	C1_07700C_A	GDP-mannose transporter; essential; required for glycosylation, hyphal growth; functional homolog of S. cerevisiae Vrg4p, which imports GDP-mannose from cytoplasm to Golgi for protein and lipid mannosylation; no mammalian homolog	0	0	NE
Plate 03	B02	774	orf19.5947	SEC7	C3_04820C_A	Putative guanine nucleotide exchange factor (GEF); mutation confers hypersensitivity to Brefeldin A; caspofungin repressed	0	3.5	GD
Plate 03	B03	789	orf19.7215		C1_14080W_A	Ortholog(s) have snoRNA binding activity	0	3.75	E
Plate 03	B04	863	orf19.7232	IRR1	C1_14230C_A	Putative cohesin complex subunit; cell-cycle regulated periodic mRNA expression	0	4	E
Plate 03	B05	871	orf19.1491		C2_01820C_A	Ortholog(s) have RNA binding activity, role in mRNA splicing, via spliceosome and U1 snRNP, U2-type prespliceosome localization	0	4	E
Plate 03	B06	28	orf19.3062		C1_03630W_A	Ortholog(s) have role in chromatin remodeling and ASTRA complex, mitochondrion localization	0	0.75	GD
Plate 03	B07	149	orf19.7227		C1_14190C_A	Protein phosphatase inhibitor; Hap43-repressed; homozygous Tn insertion decreases colony wrinkling but does not block hyphal growth in liquid media; mutation confers hypersensitivity to toxic ergosterol analog; Spider biofilm induced	0	0	NE
Plate 03	B08	199	orf19.1633	UTP4	C3_02130W_A	Putative U3 snoRNA-associated protein; Hap43-induced; physically interacts with TAP-tagged Nop1; Spider biofilm induced	1	4	E
Plate 03	B09	301	orf19.7645		CR_10620C_A	Biotin protein ligase; catalyzes covalent attachment of biotin to biotin-dependent enzymes including acetyl CoA carboxylase and pyruvate carboxylase	0	1	GD
Plate 03	B10	394	orf19.2641	ARP1	C5_03380W_A	Putative centractin; induced upon adherence to polystyrene	0.5	1	GD
Plate 03	B11	4022	orf19.5895		C3_04440C_A	Ortholog of S. cerevisiae : YEL023C, C. glabrata CBS138 : CAGL0I03168g, C. dubliniensis CD36 : Cd36_84380, Candida tenuis NRRL Y-1498 : CANTEDRAFT_101635 and Pichia stipitis Pignal : PICST_19384	0	0	NE
Plate 03	B12	4066	orf19.6707		C7_03500W_A	Predicted vacuolar protein with a calcineurin-like phosphoesterase domain; repressed by alpha pheromone in SpiderM medium	0	0	NE
Plate 03	C01	4268	orf19.6168		C3_00910W_A	Ortholog of Debaryomyces hansenii CBS767 : DEHA2F17930g, Candida dubliniensis CD36 : CD36_80830, Candida tropicalis MYA-3404 : CTRG_04030 and Candida lusitaniae ATCC 42720 : CLUG_04224	0	0	NE
Plate 03	C02	4271	orf19.7184		C7_03970C_A	Ortholog of C. parapsilosis CDC317 : CPAR2_702340, Candida tenuis NRRL Y-1498 : CANTEDRAFT_112965, Debaryomyces hansenii CBS767 : DEHA2G16566g and Candida dubliniensis CD36 : CD36_73640	0	0	NE
Plate 03	C03	4216	orf19.4941	TYE7	C1_13140C_A	bHLH transcription factor; control of glycolysis; required for biofilm formation; hyphally regulated by Cph1, Cyr1; flucytosine, Hog1 induced; amphotericin B, caspofungin repressed; induced in flow model biofilm and planktonic cultures	0	0	NE
Plate 03	C04	4251	orf19.4414		C4_06040W_A	Ortholog of C. parapsilosis CDC317 : CPAR2_501450, Candida tenuis NRRL Y-1498 : CANTEDRAFT_105024, Debaryomyces hansenii CBS767 : DEHA2D12364g and Candida dubliniensis CD36 : CD36_45590	0	0	NE
Plate 03	C05	4262	orf19.7567		CR_09930W_A	Protein of unknown function; induced by alpha pheromone in SpiderM medium	1	0.75	GD
Plate 03	C06	4263	orf19.5067		C1_07960W_A	Predicted nuclear exosome-associated nucleic acid binding protein; rat catheter and Spider biofilm induced	0	1	GD
Plate 03	C07	4074	orf19.2671		C4_03190W_A	Protein with a predicted FAD-dependent pyridine nucleotide reductase domains; putative oxidoreductase; Plc1-regulated; possibly an essential gene, disruptants not obtained by UAU1 method	0	0	NE
Plate 03	C08	4127	orf19.7073		C7_00460W_A	Ortholog of S. cerevisiae : YCL002C, C. glabrata CBS138 : CAGL0B04719g, C. parapsilosis CDC317 : CPAR2_805360, Candida dubliniensis CD36 : CD36_70180 and Pichia stipitis Pignal : PICST_64481	0	0	NE
Plate 03	C09	4147	orf19.2653		C5_03260C_A	Protein with a transient receptor potential (TRP) ion channel domain; mutants are viable; rat catheter and Spider biofilm induced	0	0	NE
Plate 03	C10	4175	orf19.3466		C6_02250W_A	Predicted methyltransferase; downregulated by fluphenazine treatment or in an azole-resistant strain that overexpresses CDR1 and CDR2	0	0	NE
Plate 03	C11	4207	orf19.1125		C2_08200W_A	Predicted hydrolase; induced by nitric oxide	0	0	NE
Plate 03	C12	4132	orf19.3434	TRY5	C6_01500C_A	Zn(II)2Cys6 transcription factor; regulator of yeast form adherence; required for yeast cell adherence to silicone substrate	0	0	NE
Plate 03	D01	4105	orf19.645	HGT9	CR_05090C_A	Putative glucose transporter of the major facilitator superfamily; the C. albicans glucose transporter family comprises 20 members; 12 probable membrane-spanning segments; induced at low (0.2%, compared to 2%) glucose in rich media; intron	0	0	NE
Plate 03	D02	4190	orf19.703		CR_06690C_A	Ortholog(s) have 2',3'-cyclic-nucleotide 3'-phosphodiesterase activity, role in cyclic nucleotide metabolic process and clathrin-coated vesicle localization	0	0	NE
Plate 03	D03	4203	orf19.3560		C2_05300C_A	S. cerevisiae ortholog Mrps35p is a structural constituent of ribosome and localizes to mitochondrial small ribosomal subunit; the snoRNA CD39 is encoded within the MRPS35 intron	0	3.5	GD
Plate 03	D04	3813	orf19.4686		C4_01020C_A	Ortholog of S. cerevisiae : YIL151C, C. glabrata CBS138 : CAGL0H06611g, C. parapsilosis CDC317 : CPAR2_401340 and Candida tenuis NRRL Y-1498 : CANTEDRAFT_104645	0	0	NE
Plate 03	D05	3820	orf19.3536		C2_05050C_A	Ortholog(s) have acetylglucosaminyltransferase activity, role in protein N-linked glycosylation and Golgi medial cisterna localization	0.5	0	NE
Plate 03	D06	3823	orf19.2659	UCF1	C2_08290C_A	Upregulated by cAMP in filamentous growth; induced in high iron, decreased upon yeast-hypha switch; downregulation correlates with clinical fluconazole resistance; Ras1-regulated; Hap43-repressed; flow model biofilm induced	0	0	NE
Plate 03	D07	3843	orf19.6660		C5_03510C_A	Protein of unknown function; mRNA binds to She3; Hap43-repressed; rat catheter and flow model biofilm induced	0	0	NE
Plate 03	D08	3876	orf19.5629	QCR7	C6_03400C_A	Putative ubiquinol-cytochrome-c reductase, subunit 7; Hap43p-repressed gene	0	0.25	GD
Plate 03	D09	4021	orf19.7150	NRG1	C7_04230W_A	Transcription factor/repressor; regulates chlamydospore formation/hyphal gene induction/virulence and rescue/stress response genes; effects both Tup1 dependent and independent regulation; flow model biofilm induced; Spider biofilm repressed	#N/A	#N/A	#N/A
Plate 03	D10	4089	orf19.4730		C1_08710W_A	Ortholog of S. cerevisiae : YNL050C, C. glabrata CBS138 : CAGL0G01276g, C. parapsilosis CDC317 : CPAR2_804440, Candida tenuis NRRL Y-1498 : CANTEDRAFT_94168 and Debaryomyces hansenii CBS767 : DEHA2D02882g	0	0	NE
Plate 03	D11	4091	orf19.4528		C1_01950C_A	Ortholog(s) have role in vacuolar protein processing and endoplasmic reticulum localization	0	0	NE
Plate 03	D12	3748	orf19.6133	PIF1	CR_07360W_A	Putative DNA helicase; decreased transcription is observed upon fluphenazine treatment	0	0	NE
Plate 03	E01	3785	orf19.1479		C2_01680C_A	Ortholog of the mitochondria localized S. cerevisiae Pib2 protein of unknown function; has a FYVE zinc finger domain; Spider biofilm induced	0	0	NE
Plate 03	E02	3811	orf19.4629		C4_01560C_A	Ortholog(s) have ubiquitin-ubiquitin ligase activity, role in mitochondrion inheritance, protein monoubiquitination, protein polyubiquitination and plasma membrane, ubiquitin ligase complex localization	0.5	0	NE
Plate 03	E03	3851	orf19.6200		C1_07040C_A	Pry family pathogenesis-related protein; oral infection upregulated gene; mutant has reduced capacity to damage oral epithelial cells	0	0	NE
Plate 03	E04	3879	orf19.5812		C2_02930C_A	Ortholog of S. cerevisiae Ett1, a nuclear protein that inhibits replication of Brome mosaic virus; early-stage flow model biofilm induced	0	0	NE
Plate 03	E05	3895	orf19.4023	MRP2	C5_05290C_A	Protein similar to S. cerevisiae Mrp2p, which is a component of the small subunit of the mitochondrial ribosome; transposon mutation affects filamentous growth	0	0	NE
Plate 03	E06	3896	orf19.585		C5_00820W_A	Ortholog(s) have structural constituent of ribosome activity and mitochondrial large ribosomal subunit localization	0	3.25	GD
Plate 03	E07	3909	orf19.7017	YOX1	C7_00970C_A	Putative homeodomain-containing transcription factor; transcriptional repressor; periodic mRNA expression, peak at cell-cycle G1/S phase	0.5	0	NE
Plate 03	E08	3916	orf19.3406		C6_01780C_A	Predicted chloride transporter; member of conserved Mcm1 regulon; Spider biofilm repressed	0	0	NE
Plate 03	E09	3923	orf19.6055		C1_00530C_A	Ortholog of C. parapsilosis CDC317 : CPAR2_800010, Candida tenuis NRRL Y-1498 : CANTEDRAFT_125085, Debaryomyces hansenii CBS767 : DEHA2D09086g and Candida dubliniensis CD36 : CD36_00460	0	0	NE
Plate 03	E10	3928	orf19.811		C2_04100W_A	Protein of unknown function; mutant is viable; Hap43-repressed	0	0	NE
Plate 03	E11	3970	orf19.297	DTD2	C3_03010C_A	Ortholog(s) have D-leucyl-tRNA(Leu) deacylase activity, D-tyrosyl-tRNA(Tyr) deacylase activity, role in D-leucine catabolic process, D-tyrosine catabolic process and cytosol, nucleus localization	0	0	NE
Plate 03	E12	3983	orf19.4294		C5_02740W_A	Ortholog(s) have oxidoreductase activity, role in cytochrome c-heme linkage, mitochondrial membrane organization and extrinsic to mitochondrial inner membrane localization	0	0	NE
Plate 03	F01	1203	orf19.6515	HSP90	C7_02030W_A	Essential chaperone, regulates several signal transduction pathways and temperature-induced morphogenesis; activated by heat shock, stress; localizes to surface of hyphae, not yeast cells; mediates echinocandin and biofilm azole resistance	0	4	E
Plate 03	F02	1205	orf19.5934		C3_04740C_A	Ortholog(s) have DNA topoisomerase type I activity	0	0.75	GD
Plate 03	F03	1212	orf19.2706	CRH11	C4_02900C_A	GPI-anchored cell wall transglycosylase, putative ortholog of S. cerevisiae Crh1p; predicted glycosyl hydrolase domain; similar to Csf4p and to antigenic A. fumigatus Aspf9; predicted Kex2p substrate; caspofungin-induced	0.5	0	NE
Plate 03	F04	1222	orf19.2075	DFG5	C2_00520W_A	N-linked mannoprotein of cell wall and membrane; possible signal transducer; role in hyphal growth and HWP1 induction in alkaline pH; GPI modification predicted; dfg5 dcw1 double mutant is inviable; caspofungin-induced, fungal-specific	0	0	NE
Plate 03	F05	1261	orf19.3823	ZDS1	C4_04580W_A	Nonessential protein; similar to S. cerevisiae Zds1p	0	0	NE
Plate 03	F06	4128	orf19.4366		CR_03670W_A	Ortholog of Candida dubliniensis CD36 : CD36_28870, Candida tropicalis MYA-3404 : CTRG_00731 and Candida albicans WO-1 : CAWG_01703	0	0	NE
Plate 03	F07	910	orf19.7484	ADE1	CR_00510C_A	Phosphoribosylaminoimadazole succinocarboxamide synthetase, enzyme of adenine biosynthesis; not induced in GCN response, unlike the S. cerevisiae ortholog; fungal-specific (no human or murine homolog); levels decrease in stationary phase	0	4	E
Plate 03	F08	1208	orf19.6364	VSP21	CR_08060C_A	Late endosomal Rab small monomeric GTPase involved in transport of endocytosed proteins to the vacuole; involved in filamentous growth and virulence; Spider biofilm induced	0	0	NE
Plate 03	F09	887	orf19.4937	CHS3	C1_13110C_A	Major chitin synthase of yeast and hyphae; synthesizes short-chitin fibrils; Chs4-activated; transcript induced at yeast-hyphal transition; Chs1 and Chs2, but not Chs3, are inhibited by the protoberberine HWY-289; Spider biofilm induced	0	0	NE
Plate 03	F10	991	orf19.4255	ECM331	C5_02460C_A	GPI-anchored protein; mainly at plasma membrane, also at cell wall; Hap43, caspofungin-induced; Plc1-regulated; Hog1, Rim101-repressed; colony morphology-related regulated by Ssn6; induced by ketoconazole and hypoxia	0	0	NE
Plate 03	F11	940	orf19.1289	SCT1	C3_00820W_A	Putative glycerol-3-phosphate O-acyltransferase; fungal-specific (no human or murine homolog)	0	0	NE
Plate 03	F12	2273	orf19.7523	MKC1	CR_00120C_A	MAP kinase; role in biofilm formation, contact-induced invasive filamentation, systemic virulence in mouse, cell wall structure/maintenance, caspofungin response; phosphorylated on surface contact, membrane perturbation, or cell wall stress	0	1	GD
Plate 03	G01	1048	orf19.5505	HIS7	C7_03720C_A	Putative imidazole glycerol phosphate synthase; histidine biosynthesis; no human/murine homolog; transcription induced by histidine starvation; regulated by Gcn2p and Gcn4p; higher protein level in stationary phase	0	2.5	E
Plate 03	G02	1015	orf19.158		C3_01150C_A	Ortholog of S. cerevisiae Apd1; required for normal localization of actin patches and normal tolerance of sodium ions and hydrogen peroxide; Hap43-induced; Spider biofilm induced	0	0	NE
Plate 03	G03	2718	orf19.2655	BUB3	C5_03240W_A	Protein similar to S. cerevisiae Bub3; a kinetochore checkpoint component; induced by hydroxyurea treatment; flow model biofilm induced; Spider biofilm induced	0	0	NE
Plate 03	G04	3026	orf19.2678	BUB1	C4_03120C_A	Putative cell cycle checkpoint kinase; mutation confers increased sensitivity to nocodazole	0	0	NE
Plate 03	G05	1380	orf19.2283	DQD1	C2_07260C_A	Putative 3-dehydroquinate dehydratase; ketoconazole-repressed; protein abundance downregulated by macrophages; flow model biofilm induced	0	4	E
Plate 03	G06	1549	orf19.1119	MTR10	C5_03760C_A	Putative importin; member of a family of fungal-specific nuclear importins; Mig1-regulated	0	0	NE
Plate 03	G07	950	orf19.3548		C2_05170W_A	Ortholog(s) have mitochondrion localization	0	0	NE
Plate 03	G08	1556	orf19.3952		C5_04670W_A	Ortholog(s) have GTP binding, signal recognition particle binding activity, role in protein targeting to ER and cytosol, endoplasmic reticulum membrane, nucleus localization	0	1.75	GD
Plate 03	G09	2386	orf19.847	YIM1	C2_03750W_A	Protein similar to protease of mitochondrial inner membrane; increased transcription is observed upon benomyl treatment; macrophage-downregulated gene	0	0	NE
Plate 03	G10	2330	orf19.3173		C5_01980C_A	Ortholog(s) have Golgi apparatus, endoplasmic reticulum localization	0	0	NE
Plate 03	G11	2380	orf19.642		CR_05120W_A	Ortholog of C. parapsilosis CDC317 : CPAR2_203380, Candida tenuis NRRL Y-1498 : CANTEDRAFT_117493, Debaryomyces hansenii CBS767 : DEHA2G19228g and Candida dubliniensis CD36 : CD36_30470	0	0	NE
Plate 03	G12	2366	orf19.4798		C1_09360C_A	Ortholog(s) have role in establishment of protein localization to plasma membrane and mitochondrion, plasma membrane localization	#N/A	#N/A	#N/A
Plate 03	H01	2422	orf19.5634	FRP1	C4_00110C_A	Ferric reductase; alkaline-induced by Rim101; iron-chelation-induced by CCAAT-binding factor; fluconazole-repressed; ciclopirox-, hypoxia-, Hap43-induced; colony morphology-related regulation by Ssn6; Spider and flow model biofilm induced	0	0	NE
Plate 03	H02	1950	orf19.2426		CR_03020C_A	Predicted HD domain metal dependent phosphohydrolase; Spider biofilm repressed	0	0	NE
Plate 03	H03	2277	orf19.6832		C3_06710W_A	Protein of unknown function; regulated by Sef1p-, Sfu1p-, and Hap43p	0	0	NE
Plate 03	H04	2420	orf19.2876	CBF1	C4_06580W_A	Transcription factor; binds ribosomal protein gene promoters and rDNA locus with Tbf1; regulates sulfur starvation-response, respiratory, glycolytic genes; does not bind to centromeres as does S. cerevisiae Cbf1; Spider biofilm repressed	0	1.25	GD
Plate 03	H05	2517	orf19.3442		C6_01420C_A	Putative oxidoreductase; Hap43-repressed gene	1	1	GD
Plate 03	H06	2544	orf19.6685	ISY1	C7_03530C_A	Putative pre-mRNA-splicing factor; mutation confers resistance to 5-fluorocytosine (5-FC); rat catheter biofilm induced	0	0	NE
Plate 03	H07	2590	orf19.4014		C5_05210W_A	Planktonic growth-induced gene	0	0	NE
Plate 03	H08	2853	orf19.3612	PST2	C2_08640C_A	Putative NADH:quinone oxidoreductase; similar to 1,4-benzoquinone reductase; immunogenic in mice; induced by benomyl, oxidative stress via Cap1; fungal-specific; farnesol-repressed; Spider biofilm induced	0	0	NE
Plate 03	H09	2845	orf19.1310		C4_03680C_A	Ortholog(s) have role in nucleotide-excision repair and nucleus localization	0	0	NE
Plate 03	H10	2760	orf19.412	SSH1	C1_05530C_A	Protein with a role in protein translocation across membranes	0	0	NE
Plate 03	H11	2943	orf19.4309	GRP2	C5_02860C_A	Methylglyoxal reductase; regulation associated with azole resistance; induced in core stress response or by oxidative stress via Cap1, fluphenazine, benomyl, by Hap43 or with long term fluconazole treatment; Spider biofilm induced	0	0	NE
Plate 03	H12	3041	orf19.1264	CFL2	C4_05780C_A	Oxidoreductase; iron utilization; Sfu1/Sef1/Hap43/Nrg1/Tup1/Rim101 regulated; alkaline/low iron/fluphenazine/ciclopirox olamine, flucytosine, fluconazole, Spider/flow model/rat catheter biofilm induced; caspofungin/amphotericin B repressed	0	0	NE
Plate 04	A01	2924	orf19.3505		C6_02060W_A	Ortholog(s) have role in TOR signaling cascade, actin filament bundle assembly, eisosome assembly, endosomal transport, establishment or maintenance of actin cytoskeleton polarity, regulation of cell growth and plasma membrane localization	0	0	NE
Plate 04	A02	2900	orf19.4347		C5_03150W_A	Putative serine/threonine protein kinase; Hog1p-induced	0.5	0	NE
Plate 04	A03	2908	orf19.1763	IFR1	C2_10180W_A	Predicted oxidoreductase/dehydrogenase; induced by nitric oxide; rat catheter and Spider biofilm induced	0	0	NE
Plate 04	A04	2872	orf19.2753	ZCF15	C4_02490W_A	Predicted Zn(II)2Cys6 transcription factor of unknown function; rat catheter biofilm induced	0	0	NE
Plate 04	A05	2798	orf19.99	HAL21	C6_00970C_A	Putative phosphoadenosine-5'-phosphate or 3'-phosphoadenosine 5'-phosphosulfate phosphatase; possible role in sulfur recycling; ortholog of S. cerevisiae Met22; predicted Kex2 substrate; F-12/CO2 biofilm induced	0	0	NE
Plate 04	A06	2484	orf19.4939		C1_13120C_A	Ortholog(s) have guanyl-nucleotide exchange factor activity, role in Golgi to endosome transport, endocytosis, protein targeting to vacuole and Golgi apparatus, cytosol, endosome, extrinsic to membrane, trans-Golgi network localization	0.5	0	NE
Plate 04	A07	2508	orf19.2006		C2_01190C_A	Ortholog(s) have fungal-type vacuole membrane localization	0	0	NE
Plate 04	A08	2829	orf19.169	CHO2	CR_02540W_A	Putative phosphatidyl-ethanolamine N-methyltransferase; fungal-specific (no human or murine homolog); amphotericin B repressed; Hap43p-induced gene	0	0	NE
Plate 04	A09	2667	orf19.246		C3_02570W_A	Predicted metalloendopeptidase; Spider biofilm induced	0	0	NE
Plate 04	A10	3076	orf19.5826		C2_02790C_A	Has domain(s) with predicted amino acid transmembrane transporter activity, role in amino acid transmembrane transport and membrane localization	0	0	NE
Plate 04	A11	3103	orf19.5087	BUD6	C1_08120W_A	Protein required for Spitzenkorper formation in hyphal cells (wild-type localization of Mlc1p to the Spitzenkorper); localizes to polarisome	0	0	NE
Plate 04	A12	3117	orf19.1995	MNN24	C2_01300C_A	Alpha-1,2-mannosyltransferase; required for normal cell wall mannan content	0	0	NE
Plate 04	B01	3092	orf19.6094	VPS53	C1_00130C_A	Ortholog(s) have role in Golgi to vacuole transport, retrograde transport, endosome to Golgi and GARP complex localization	0	0	NE
Plate 04	B02	3121	orf19.1422	FZO1	C4_04260C_A	Putative mitochondrial biogenesis protein; rat catheter and Spider biofilm induced	0	0	NE
Plate 04	B03	3144	orf19.4231	PTH2	C5_02240W_A	Putative cAMP-independent regulatory protein; constitutive expression independent of MTL or white-opaque status; Spider biofilm induced	0	0	NE
Plate 04	B04	3370	orf19.5915	DUR35	C3_04570C_A	Putative urea transporter	0	0	NE
Plate 04	B05	4185	orf19.2958		C1_02680C_A	Planktonic growth-induced gene	#N/A	#N/A	#N/A
Plate 04	B06	4178	orf19.5655		C4_00290C_A	Has domain(s) with predicted 2 iron, 2 sulfur cluster binding, iron ion binding, oxidoreductase activity, oxidoreductase activity and acting on paired donors, more	0	0	NE
Plate 04	B07	1160	orf19.405	VCX1	C1_08580C_A	Putative H+/Ca2+ antiporter; Spider biofilm repressed	0	0	NE
Plate 04	B08	1194	orf19.2690		C4_03020W_A	Putative mitochondrial GTPase; required for mitochondrial morphology and genome maintenance; Spider biofilm induced	0	0.75	GD
Plate 04	B09	1200	orf19.4208	RAD52	C6_00510C_A	Required for homologous DNA recombination, repair of UV- or MMS-damaged DNA, telomere length, UV-induced LOH; constitutive expression, MMS-induced; weakly complements S. cerevisiae rad52 mutant; slow growth, increased white-to-opaque switch	0	0.75	GD
Plate 04	B10	1070	orf19.5639	HIS4	C4_00140C_A	Multifunctional enzyme that catalyzes three steps of histidine biosynthesis, with phosphoribosyl-AMP cyclohydrolase, phosphoribosyl-ATP diphosphatase, and histidinol dehydrogenase activities; required for wild-type adhesion to human calls	0	2.75	E
Plate 04	B11	1104	orf19.3273		CR_00820C_A	Ortholog(s) have actin monomer binding, protein kinase inhibitor activity, ribosome binding activity, role in negative regulation of protein phosphorylation and cytoplasm, nucleus, polysome, ribosome localization	0	0	NE
Plate 04	B12	1169	orf19.3071	MIH1	C3_00800W_A	Putative protein phosphatase of the PTP family (tyrosine-specific); ortholog of S. cerevisiae Mih1; mRNA binds She3	0	0	NE
Plate 04	C01	4333	orf19.3213		C5_03980W_A	Protein of unknown function; Spider biofilm induced	0	0	NE
Plate 04	C02	1554	orf19.7161	SUI3	C7_04130C_A	Putative translation initiation factor; genes encoding ribosomal subunits, translation factors, and tRNA synthetases are downregulated upon phagocytosis by murine macrophage	0.5	4	E
Plate 04	C03	1635	orf19.3803	MNN22	C4_04770C_A	Alpha-1,2-mannosyltransferase; required for normal cell wall mannan; regulated by Tsa1, Tsa1B at 37 deg; repressed in core stress response; NO, Hog1 induced; confers sensitivity to cell wall perturbing agents; Spider biofilm repressed	0	0	NE
Plate 04	C04	4070	orf19.1910		C2_00110W_A	Predicted NADH-dependent flavin oxidoreductase; Hap43-repressed gene	0	0.5	GD
Plate 04	C05	4202	orf19.7444		C3_06550C_A	Ortholog(s) have cytoplasm, holo TFIIH complex localization	0	0	NE
Plate 04	C06	1361	orf19.260	SLD1	C3_02680C_A	Sphingolipid delta-8 desaturase; catalyzes desaturation at C8 in the long-chain base moiety of ceramides in glucosylceramide synthesis, important for virulence; ketoconazole and hypoxia induced; Hap43-repressed; Spider biofilm induced	0	0	NE
Plate 04	C07	1370	orf19.2842	GZF3	CR_02850C_A	GATA-type transcription factor; oxidative stress-induced via Cap1; mutant has abnormal colony morphology and altered sensitivity to fluconazole, LiCl, and copper; Spider biofilm induced	0	0	NE
Plate 04	C08	1373	orf19.551		CR_04600W_A	Ortholog of C. parapsilosis CDC317 : CPAR2_204170, Candida tenuis NRRL Y-1498 : CANTEDRAFT_110235, Debaryomyces hansenii CBS767 : DEHA2F17072g and Candida dubliniensis CD36 : CD36_29980	0	0	NE
Plate 04	C09	1417	orf19.5499		C2_06350C_A	Has domain(s) with predicted 4-hydroxyphenylpyruvate dioxygenase activity and role in aromatic amino acid family metabolic process, oxidation-reduction process	1	1	GD
Plate 04	C10	1008	orf19.5595	SHE3	C6_03100W_A	mRNA-binding protein that localizes specific mRNAs to daughter yeast cells and to hyphal tips; required for normal filamentation and host epithelial cell damage; ortholog of S. cerevisiae She3 but target mRNAs differs	2	1	GD
Plate 04	C11	1288	orf19.667		C1_11370C_A	Essential protein required for the DNA integrity checkpoint pathway; Spider biofilm induced	0	0	NE
Plate 04	C12	4176	orf19.6952		C3_03670W_A	Ortholog(s) have DNA binding, chromatin binding, histone deacetylase activity	0	0	NE
Plate 04	D01	4354	orf19.7105	FAR1	C7_00180W_A	Protein involved in regulation of pheromone-mediated mating; repressed by A1p and Alpha2p in white-phase cells; null mutant shows no pheromone response in opaque cells; overexpression causes enhanced pheromone response and cell cycle arrest	0	0	NE
Plate 04	D02	5654	orf19.1156	FUS1	C1_11630C_A	Membrane protein required for mating; ortholog of S. cerevisiae Fus1; transcript induced by Cph1 in cells homozygous for the MTLa locus; alpha factor induced	0	0	NE
Plate 04	D03	4334	orf19.4525		C1_02000W_A	Ortholog(s) have endoplasmic reticulum, nuclear pore localization	0	0	NE
Plate 04	D04	1026	orf19.4496		C2_04540C_A	Ortholog(s) have Golgi apparatus, endoplasmic reticulum, fungal-type vacuole localization	0	0	NE
Plate 04	D05	1027	orf19.3581		C2_05510C_A	Ortholog(s) have histone binding activity, role in DNA replication-dependent nucleosome assembly and CAF-1 complex, cytoplasm localization	0	0	NE
Plate 04	D06	1036	orf19.789	PYC2	C4_03940C_A	Putative pyruvate carboxylase, binds to biotin cofactor; up-regulated in mutant lacking the Ssk1p response regulator protein, upon benomyl treatment, or in an azole-resistant strain overexpressing MDR1; stationary phase enriched protein	0	0	NE
Plate 04	D07	1039	orf19.972		C5_00230C_A	Ortholog(s) have 5'-flap endonuclease activity, role in DNA-dependent DNA replication and Slx1-Slx4 complex localization	0	0	NE
Plate 04	D08	1043	orf19.7459		C3_06700C_A	Putative mitochondrial protein with a predicted role in respiratory growth; fluconazole-induced; ketoconazole-repressed; mutants display a strong defect in flow model biofilm formation; Spider biofilm induced	0	3	E
Plate 04	D09	1045	orf19.1587	HGT20	C2_02610C_A	Putative glucose transporter of the major facilitator superfamily; the C. albicans glucose transporter family comprises 20 members; 12 probable membrane-spanning segments; regulated by Nrg1	0	0	NE
Plate 04	D10	1051	orf19.7069		C7_00490C_A	Putative AdoMet-dependent proline methyltransferase; Hap43-induced; required for normal flow model biofilm growth; Spider biofilm repressed	0	0	NE
Plate 04	D11	1114	orf19.3608		C2_08680W_A	Ortholog(s) have DNA insertion or deletion binding, Y-form DNA binding, double-strand/single-strand DNA junction binding, loop DNA binding activity	1	0	NE
Plate 04	D12	1115	orf19.5735	CDC50	C6_03660C_A	Putative endosomal protein; induced by Mnl1p under weak acid stress	0	0.5	GD
Plate 04	E01	1121	orf19.7678	ATP16	CR_10850C_A	Subunit of the mitochondrial F1F0 ATP synthase; sumoylation target; protein newly produced during adaptation to the serum; Spider biofilm repressed	0.5	1	GD
Plate 04	E02	1122	orf19.831		C2_03930C_A	Ortholog of C. parapsilosis CDC317 : CPAR2_211360, Candida tenuis NRRL Y-1498 : CANTEDRAFT_115359, Debaryomyces hansenii CBS767 : DEHA2D06886g and Candida dubliniensis CD36 : CD36_18570	0	1	GD
Plate 04	E03	1126	orf19.1069	RPN4	C1_04330W_A	C2H2 transcription factor; putative regulator of proteasome genes; DNA recognition sequence (GAAGGCAAAA) enriched in regions upstream of proteasome genes; induced in core stress response; Hap43-induced; Spider biofilm induced	0	0	NE
Plate 04	E04	1127	orf19.1756	GPD1	C2_10240W_A	Glycerol-3-phosphate dehydrogenase; glycerol biosynthesis; regulated by Efg1; regulated by Tsa1, Tsa1B under H2O2 stress conditions; Sflow model and Spider biofilm induced	0	0	NE
Plate 04	E05	1129	orf19.7245		C1_14330W_A	Ortholog(s) have tRNA (5-methylaminomethyl-2-thiouridylate)-methyltransferase activity, role in mitochondrial tRNA thio-modification and mitochondrion localization	0	0	NE
Plate 04	E06	1131	caydl037c		NA	Protein of unknown function; induced by alpha pheromone in SpiderM medium	#N/A	#N/A	#N/A
Plate 04	E07	1133	orf19.4761	HST1	C1_09050W_A	Putative histone deacetylase, involved in regulation of white-opaque switching	0	0	NE
Plate 04	E08	1135	orf19.250	SLC1	C3_02600C_A	Putative fatty acyltransferase; protein repressed during the mating process	0.5	1.75	GD
Plate 04	E09	1137	orf19.1564		C2_02410W_A	Plasma membrane-localized protein of unknown function	1.5	1	GD
Plate 04	E10	1139	orf19.5323	MDH1-3	C2_10480W_A	Predicted malate dehydrogenase; farnesol regulated; protein present in exponential and stationary growth phase yeast; Hap43p-repressed gene	0	0	NE
Plate 04	E11	1144	orf19.5171	PMT1	C7_02890C_A	Protein mannosyltransferase (PMT), required for virulence in mouse systemic infection and for adhesion to epithelial cells; role in hyphal growth and drug sensitivity; Als1p, Sec20p, Kre9p, Pir1p are substrates; one of 5 PMT family members	0.5	0	NE
Plate 04	E12	1145	orf19.1548		C2_02300W_A	Ortholog(s) have role in mRNA splicing, via spliceosome and U4/U6 x U5 tri-snRNP complex localization	0	4	E
Plate 04	F01	925	orf19.5627		C6_03380W_A	S. cerevisiae ortholog Hek2/Khd1 is a putative RNA binding protein involved in the asymmetric localization of ASH1 mRNA; Hap43-induced gene	0	0	NE
Plate 04	F02	781	orf19.5117	OLE1	C1_08360C_A	Fatty acid desaturase, essential protein involved in oleic acid synthesis; required for aerobic hyphal growth and chlamydospore formation; subject to hypoxic regulation; fluconazole-induced; caspofungin repressed; Hap43p-induced	0	4	E
Plate 04	F03	1541	orf19.829	SCH9	C2_03940C_A	Protein kinase; involved in growth control, cell size, resistance to rapamycin, cations, chlamydospore formation, filamentous growth under some conditions, and virulence; prevents hyphal growth in hypoxia at high CO2; Spider biofilm induced	0	0	NE
Plate 04	F04	3732	orf19.6000	CDR1	C3_05220W_A	Multidrug transporter of ABC superfamily; transports phospholipids in an in-to-out direction; induced by beta-estradiol, progesterone, corticosteroid, or cholesterol; Spider biofilm induced	0	0	NE
Plate 04	F05	538	orf19.4809	ERG12	C1_09460W_A	Ortholog(s) have mevalonate kinase activity and role in ergosterol biosynthetic process, farnesyl diphosphate biosynthetic process, mevalonate pathway, isopentenyl diphosphate biosynthetic process, mevalonate pathway	0	4	E
Plate 04	F06	59	orf19.2929	GSC1	C1_02420C_A	Essential beta-1,3-glucan synthase subunit; gsc1 allele determines resistance/sensitivity to echinocandins; 16 predicted membrane-spanning regions; mRNA abundance declines after yeast-to-hypha transition; Spider biofilm induced	1	4	E
Plate 04	F07	799	orf19.4152	CEF3	C5_01580C_A	Translation elongation factor 3; antigenic in humans; predicted C-term nucleotide-binding active site; protein on surface of yeast, not hyphae; polystyrene adherence induced; higher protein amount in stationary phase; possibly essential	0.5	4	E
Plate 04	F08	957	orf19.7478		CR_00570W_A	Ortholog(s) have antioxidant activity, di-trans,poly-cis-decaprenylcistransferase activity, protein heterodimerization activity, trans-hexaprenyltranstransferase activity	0	0	NE
Plate 04	F09	192	orf19.5463	SEC6	C3_00110C_A	Predicted subunit of the exocyst complex, involved in exocytosis; localizes to a crescent on the surface of the hyphal tip; Hap43p-repressed gene, overlaps orf19.5464 and orf19.5465	0	4	E
Plate 04	F10	1230	orf19.406	ERG1	C1_08590C_A	Squalene epoxidase, epoxidation of squalene to 2,3(S)-oxidosqualene; ergosterol biosynthesis; allylamine antifungal drug target; NADH reducing cofactor but S. cerevisiae Erg1 uses NADPH; flow model biofilm induced; Spider biofilm repressed	0	4	E
Plate 04	F11	196	orf19.3174	CDC24	C5_01970C_A	GDP-GTP exchange factor for Cdc42p; phosphorylated; required for maintenance of hyphal growth; misexpression blocks hyphal growth and causes avirulence in a mouse model of systemic infection; antigenic during human oral infection	0	4	E
Plate 04	F12	1193	orf19.5949	FAS2	C3_04830C_A	Alpha subunit of fatty-acid synthase; required for virulence in mouse systemic infection and rat oropharyngeal infection models; regulated by Efg1; fluconazole-induced; amphotericin B repressed; Spider biofilm repressed	0	4	E
Plate 04	G01	206	orf19.4882		C1_10120C_A	TFIIE small subunit; involved in RNA polymerase II transcription initiation; Spider biofilm induced	0	4	E
Plate 04	G02	50	orf19.6511	LIG1	C7_02060W_A	tRNA ligase; functional homolog of S. cerevisiae Trl1	0	4	E
Plate 04	G03	1521	orf19.5759	SNQ2	C6_03840C_A	Protein similar to S. cerevisiae Snq2p transporter; member of PDR subfamily of ABC family; transposon mutation affects filamentation; benomyl-induced transcription; detected at yeast-form cell plasma membrane by mass spec	0	0	NE
Plate 04	G04	3019	orf19.3740	PGA23	CR_02280W_A	Putative GPI-anchored protein of unknown function; Rim101-repressed; Cyr1-regulated; colony morphology-related gene regulation by Ssn6	0	0	NE
Plate 04	G05	828	orf19.6034	TUB2	C1_00710C_A	Beta-tubulin; functional homolog of ScTub2p; overproduction causes S. cerevisiae inviability; has two introns; hyphal-induced; fluconazole-induced; slow growth, ectopic expression causes increased white-to opaque switching; GlcNAc-induced	1	4	E
Plate 04	G06	305	orf19.4618	FBA1	C4_01750C_A	Fructose-bisphosphate aldolase; glycolytic enzyme; antigenic in murine/human infection; regulated by yeast-hypha switch; induced by Efg1, Gcn4, Hog1, fluconazole; phagocytosis-repressed; flow model biofilm induced; Spider biofilm repressed	0	4	E
Plate 04	G07	649	orf19.7265		C1_14470W_A	Putative zinc-finger domain protein with a predicted role in pre-mRNA splicing; Hap43-repressed; Spider biofilm repressed	0	0	NE
Plate 04	G08	992	orf19.7572	SPT7	CR_09980W_A	Putative SAGA transcriptional regulatory complex subunit; mutation confers hypersensitivity to toxic ergosterol analog, and to amphotericin B	1	1	GD
Plate 04	G09	988	orf19.5364		C2_10810W_A	Putative pre-mRNA splicing factor; intron in 5'-UTR; possibly an essential gene, disruptants not obtained by UAU1 method	0	0	NE
Plate 04	G10	966	orf19.1011	MNN21	CR_05300C_A	Ortholog(s) have alpha-1,2-mannosyltransferase activity, role in protein glycosylation and Golgi apparatus localization	0	0	NE
Plate 04	G11	981	orf19.136		C6_01290C_A	Predicted membrane transporter, member of the drug:proton antiporter (12 spanner) (DHA1) family, major facilitator superfamily (MFS); Hap43p-repressed gene	0	0	NE
Plate 04	G12	1083	orf19.7124	RVS161	C7_00020C_A	Protein required for endocytosis; contains a BAR domain, which is found in proteins involved in membrane curvature; null mutant exhibits defects in hyphal growth, virulence, cell wall integrity, and actin patch localization	0	0	NE
Plate 04	H01	1181	orf19.5964	ARF2	C3_04950W_A	Putative ADP-ribosylation factor; mutation confers hypersensitivity to Brefeldin A; Spider biofilm repressed	0	4	E
Plate 04	H02	1066	orf19.4650	ILV6	C4_01370W_A	Putative regulatory subunit of acetolacetate synthase; alkaline induced; regulated by Gcn2 and Gcn4; protein present in exponential and stationary growth phase yeast; Spider biofilm repressed	0	0	NE
Plate 04	H03	1053	orf19.5808		C2_02960C_A	Ortholog(s) have protein-lysine N-methyltransferase activity, role in negative regulation of G2/M transition of mitotic cell cycle, peptidyl-lysine methylation and cytosol, nucleus localization	0	0	NE
Plate 04	H04	1110	orf19.3792		C4_04870C_A	Ortholog(s) have role in chromosome segregation, cytoplasmic mRNA processing body assembly, deadenylation-dependent decapping of nuclear-transcribed mRNA and formation of translation preinitiation complex, more	0	0	NE
Plate 04	H05	1629	orf19.3363	VTC4	C4_03360C_A	Putative polyphosphate synthetase; decreased expression in hyphae compared to yeast-form cells; fungal-specific (no human or murine homolog); virulence-group-correlated expression	0	0	NE
Plate 04	H06	2049	orf19.6460	PEX1	C7_02490W_A	Ortholog(s) have ATPase activity, protein heterodimerization activity, role in protein import into peroxisome matrix, receptor recycling and cytosol, peroxisomal membrane localization	0	0	NE
Plate 04	H07	1561	orf19.6804		C3_06970W_A	Ortholog(s) have signal sequence binding activity, role in protein targeting to ER and cytosol, signal recognition particle, endoplasmic reticulum targeting localization	0	1.75	GD
Plate 04	H08	1378	orf19.2281		C2_07240C_A	Has domain(s) with predicted CoA-transferase activity and role in ketone body catabolic process	0	0	NE
Plate 04	H09	1390	orf19.1306		C4_03720C_A	Ortholog(s) have cytosol, nucleus localization	0	0	NE
Plate 04	H10	1011	orf19.3539		C2_05080C_A	Predicted nucleolar S-adenosylmethionine-dependent rRNA methyltransferase; Spider biofilm induced	0	0	NE
Plate 04	H11	1547	orf19.4930	SPC3	C1_13020C_A	Essential protein; similar to S. cerevisiae Spc3p, a component of the signal peptidase complex required for signal peptidase activity; predicted integral ER membrane protein; complements spc3 and suppresses sec61 S. cerevisiae mutants	0	4	E
Plate 04	H12	1533	orf19.6155		C3_00830C_A	Ortholog(s) have DNA ligase (ATP) activity	0	3.5	E
Plate 05	A01	1429	orf19.2462	PRN3	C1_05870W_A	Protein similar to pirin; induced by Mnl1 under weak acid stress; Hap43-repressed; Spider biofilm induced	0	0	NE
Plate 05	A02	1038	orf19.5294	PDB1	C4_04150C_A	Putative pyruvate dehydrogenase; fluconazole-induced; protein level decreases in stationary phase cultures; Spider biofilm repressed	0	0	NE
Plate 05	A03	1168	orf19.4927	BNI1	C1_12960C_A	Formin; role in cytoskeletal organization, cell polarity; role in systemic virulence in mouse; cell-cycle regulated localization to site of polarized growth, bud neck; localizes to Spitzenkorper of hyphae, minor localization at septum	0	0	NE
Plate 05	A04	1300	orf19.2501	FLC1	C3_00980W_A	Protein involved in heme uptake; putative FAD transporter, similar to S. cerevisiae Flc1; regulated by iron; macrophage-induced; mutant defective in filamentous growth; Spider biofilm induced	0	0	NE
Plate 05	A05	3827	orf19.6323	HPA2	C6_00140C_A	Ortholog(s) have D-amino-acid N-acetyltransferase activity, role in D-amino acid metabolic process and cytosol, nucleus localization	0	0	NE
Plate 05	A06	3831	orf19.5917	STP3	C3_04580C_A	Transcription factor; regulates SAP2, OPT1 expression and thereby protein catabolism for nitrogen source; activated via amino-acid-induced proteolytic processing; macrophage/pseudohyphal-repressed; Spider biofilm repressed	0	0	NE
Plate 05	A07	4084	orf19.639		CR_05160C_A	S. cerevisiae ortholog YDR370C/DXO1 has decapping and 5&#8242;-3&#8242; exoRNase activity; decreased transcription is observed upon fluphenazine treatment or in an azole-resistant strain that overexpresses CDR1 and CDR2	0	0	NE
Plate 05	A08	4151	orf19.1862		C2_07630C_A	Possible stress protein; increased transcription associated with CDR1 and CDR2 overexpression or fluphenazine treatment; regulated by Sfu1, Nrg1, Tup1; stationary phase enriched protein; Spider biofilm induced	0	0	NE
Plate 05	A09	4161	orf19.3533		C2_05020W_A	Ortholog(s) have role in ascospore formation, mitochondrial respiratory chain complex assembly, positive regulation of transcription from RNA polymerase II promoter	0	0	NE
Plate 05	A10	3780	orf19.652		CR_05010W_A	Ortholog(s) have crossover junction endodeoxyribonuclease activity, role in DNA repair and cytoplasm, nucleus localization	0	0	NE
Plate 05	A11	3782	orf19.696	STE2	CR_06610W_A	Receptor for alpha factor mating pheromone, MFalpha; required for a-type cells to respond to alpha factor, for opaque a-form mating and white a-form response; possible Kex2p substrate; a-specific, alpha-factor induced, A1p-Alpha2p repressed	0	0	NE
Plate 05	A12	3787	orf19.1528		C2_02120W_A	Putative mitochondrial RNA polymerase specificity factor; possibly an essential gene, disruptants not obtained by UAU1 method	0	3.25	E
Plate 05	B01	3798	orf19.4816		C1_09520C_A	Protein of unknown function; induced by nitric oxide	0	0	NE
Plate 05	B02	3802	orf19.4887	ECM21	C1_10180C_A	Predicted regulator of endcytosis of plasma membrane proteins; fluconazole induced, alkaline induced by Rim101; repressed by caspofungin and in azole-resistant strain overexpressing MDR1; flow model, rat catheter and Spider biofilm induced	0	0	NE
Plate 05	B03	3814	orf19.1250		C4_05650W_A	Ortholog(s) have role in maturation of SSU-rRNA from tricistronic rRNA transcript (SSU-rRNA, 5.8S rRNA, LSU-rRNA) and cytoplasm, nucleolus localization	0	3.25	E
Plate 05	B04	3858	orf19.2934		C1_02450C_A	Similar to S. cerevisiae Bud20; predicted role in cellular bud site selection; rat catheter and Spider biofilm induced	0	1	GD
Plate 05	B05	3868	orf19.3367		C4_03410W_A	Ortholog(s) have structural constituent of ribosome activity and mitochondrial large ribosomal subunit localization	0	2.75	GD
Plate 05	B06	3889	orf19.203	STB3	C2_09010W_A	Putative SIN3-binding protein 3 homolog; caspofungin induced; macrophage/pseudohyphal-repressed; rat catheter biofilm induced	0	0	NE
Plate 05	B07	3891	orf19.6717		C3_07700W_A	Putative serine hydrolase; Spider biofilm repressed	0	0	NE
Plate 05	B08	3925	orf19.7038		C7_00790W_A	Ortholog(s) have phosphatidylinositol-3-phosphate binding activity, role in protein targeting to vacuole and cytoplasm, nucleus localization	0	0	NE
Plate 05	B09	3962	orf19.414		C1_05500W_A	Predicted mitochondrial small ribosomal subunit; rat catheter and Spider biofilm induced	0	0.5	GD
Plate 05	B10	3979	orf19.415		C1_05490C_A	Putative protein of unknown function; Hap43p-repressed gene	0	0	NE
Plate 05	B11	4016	orf19.4176		C4_00660W_A	Ortholog(s) have structural constituent of ribosome activity and mitochondrial small ribosomal subunit localization	0	0	NE
Plate 05	B12	4028	orf19.386	SAM4	C1_08410C_A	Putative S-adenosylmethionine-homocysteine methyltransferase; Hap43-repressed; alkaline induced; Spider biofilm repressed	0	0	NE
Plate 05	C01	4029	orf19.6885	SPO7	C2_05740W_A	Putative regulatory subunit of Nem1-Spo7 phosphatase holoenzyme that regulates nuclear growth by controling phospholipid biosynthesis; induced by alpha pheromone in SpiderM medium	0	0	NE
Plate 05	C02	3999	orf19.4357		CR_03860C_A	Putative protein similar to S. cerevisiae Mgr3p, a subunit of the i-AAA protease supercomplex that degrades misfolded mitochondrial proteins	0	0	NE
Plate 05	C03	3788	orf19.1533		C2_02170W_A	Possible vacuolar protein; Hap43-induced gene	0	0	NE
Plate 05	C04	3800	orf19.4844		C1_09790C_A	Ortholog(s) have RNA binding, polynucleotide adenylyltransferase activity, protein binding, bridging activity	1	0	NE
Plate 05	C05	3801	orf19.4866	CPP1	C1_10000C_A	VH1 family MAPK phosphatase; regulates Cst20-Hst7-Cek1-Cph1 filamentation pathway; represses yeast-hyphal switch; required for virulence in mice; yeast-enriched; induced by alpha pheromone in SpiderM medium; Spider biofilm induced	0	0	NE
Plate 05	C06	3887	orf19.5278		C1_11890W_A	Protein of unknown function; Spider biofilm induced	0	3.25	GD
Plate 05	C07	3888	orf19.3022		C1_03280W_A	Ortholog(s) have structural constituent of ribosome activity and mitochondrial small ribosomal subunit localization	0	0	NE
Plate 05	C08	3920	orf19.2199	PHO86	C2_07820C_A	Putative endoplasmic reticulum protein; possibly adherence-induced	0	0	NE
Plate 05	C09	3938	orf19.2363		CR_07020W_A	Ortholog(s) have thiosulfate sulfurtransferase activity and mitochondrion localization	0	0	NE
Plate 05	C10	3973	orf19.6071		C1_00380C_A	Ortholog(s) have peptide alpha-N-acetyltransferase activity, role in N-terminal peptidyl-methionine acetylation, cytoskeleton organization, mitochondrion inheritance and NatB complex localization	0	0	NE
Plate 05	C11	4005	orf19.7237		C1_14270W_A	Ortholog(s) have arylformamidase activity and role in NAD biosynthetic process	0	0	NE
Plate 05	C12	4007	orf19.6851	CHL4	C1_04570C_A	Protein described as having role in chromosome segregation; RNA abundance regulated by tyrosol and cell density	0	0	NE
Plate 05	D01	4015	orf19.3659		C6_00700C_A	Putative CTD phosphatase; role in dephosphorylation of RNA polymerase II C-terminal domain, transcription from RNA polymerase II promoter; flow model biofilm induced	0	0	NE
Plate 05	D02	4027	orf19.3263	ATO10	CR_00930W_A	Putative fungal-specific transmembrane protein; rat catheter and Spider biofilm induced	0	0	NE
Plate 05	D03	1678	orf19.3954		C5_04680W_A	Ortholog(s) have phosphatidylserine decarboxylase activity and role in phosphatidylcholine biosynthetic process, phosphatidylethanolamine biosynthetic process, regulation of cell cycle cytokinesis, regulation of cell shape	0	0	NE
Plate 05	D04	3792	orf19.4722		C1_08640W_A	Ortholog(s) have sequence-specific DNA binding RNA polymerase II transcription factor activity	0.5	0.75	GD
Plate 05	D05	3804	orf19.4958	ECM25	C1_13310W_A	Non-essential protein involved in cell morphogenesis	0	0	NE
Plate 05	D06	3873	orf19.5270		C1_11950W_A	Protein of unknown function; rat catheter biofilm induced	0	0	NE
Plate 05	D07	3890	orf19.6029	ROT1	C1_00770C_A	Similar to S. cerevisiae Rot1p, which is involved in cell wall 1,6-beta-glucan biosynthesis; has predicted transmembrane region; possibly an essential gene, disruptants not obtained by UAU1 method	0	3.75	E
Plate 05	D08	3972	orf19.947	MRP17	C5_00420C_A	Predicted mitochondrial ribosomal protein	0	2.5	GD
Plate 05	D09	4001	orf19.7385		C3_06040W_A	CCCH zinc finger protein; Spider biofilm induced	0	0	NE
Plate 05	D10	3819	orf19.3624		C2_08550C_A	Ortholog(s) have exoribonuclease II activity, role in mitochondrial RNA catabolic process and mitochondrial degradosome localization	0	0	NE
Plate 05	D11	3822	orf19.3574	MDJ2	C2_05450C_A	Predicted component of the mitochondrial import motor; involved in protein import into mitochondrial matrix; early-stage flow model biofilm induced	0	0	NE
Plate 05	D12	4072	orf19.3937		C5_04520W_A	Ortholog(s) have protein phosphatase type 2A regulator activity, role in cellular response to nitrogen starvation, signal transduction and cytosol, nucleus localization	0	0	NE
Plate 05	E01	4075	orf19.4011		C5_05180W_A	Similar to S. pombe mug180, a predicted esterase/lipase; highly induced during chlamydospore formation in both C. albicans and C. dubliniensis; flow model biofilm induced	0	0	NE
Plate 05	E02	4076	orf19.6681		C5_03690W_A	Protein of unknown function; Spider biofilm induced	0	0	NE
Plate 05	E03	4078	orf19.5601		C6_03150C_A	Ortholog of C. parapsilosis CDC317 : CPAR2_601360, Candida tenuis NRRL Y-1498 : CANTEDRAFT_108198, Debaryomyces hansenii CBS767 : DEHA2C04136g and Candida dubliniensis CD36 : CD36_63910	0	0	NE
Plate 05	E04	4102	orf19.612		CR_07870W_A	Ortholog of S. cerevisiae : AIM32, C. glabrata CBS138 : CAGL0L01529g, C. parapsilosis CDC317 : CPAR2_702070, Candida tenuis NRRL Y-1498 : CANTEDRAFT_114174 and Debaryomyces hansenii CBS767 : DEHA2E10956g	0	0	NE
Plate 05	E05	4103	orf19.1773	RAP1	C2_10080W_A	Transcription factor; binds telomeres and regulatory sequences in DNA; involved in telomere maintenance; represses hyphal growth under yeast-favoring conditions; similar to (but shorter than) S. cerevisiae Rap1	0	0	NE
Plate 05	E06	4146	orf19.2060	SOD5	C2_00680C_A	Cu and Zn-containing superoxide dismutase; protects against oxidative stress; induced by neutrophils, hyphal growth, caspofungin, osmotic/oxidative stress; oralpharyngeal candidiasis induced; rat catheter and Spider biofilm induced	0	0	NE
Plate 05	E07	4165	orf19.944	IFG3	C5_00450C_A	Putative D-amino acid oxidase; Spider biofilm induced	0	0	NE
Plate 05	E08	4046	orf19.3282	BMT3	CR_00740C_A	Beta-mannosyltransferase; adds 2nd beta-mannose to the acid-stable fraction of cell wall phosphopeptidomannan, elongation of beta-mannose chains on the phosphopeptidomannan acid-labile fraction; Hap43-induced; Spider biofilm induced	0	0	NE
Plate 05	E09	4052	orf19.3362		C4_03350C_A	Has domain(s) with predicted flavin adenine dinucleotide binding, oxidoreductase activity and role in oxidation-reduction process	0	0	NE
Plate 05	E10	4053	orf19.5016		C1_13790C_A	Ortholog(s) have role in cellular response to UV and cytosol, nucleus localization	0	0	NE
Plate 05	E11	4054	orf19.1632		C3_02140C_A	Ortholog(s) have cytosol, nucleus localization	0	0	NE
Plate 05	E12	4055	orf19.2238	LTE1	C2_06860W_A	Protein similar to GDP/GTP exchange factors; repressed by alpha pheromone in SpiderM medium	0	0	NE
Plate 05	F01	4058	orf19.1681		C3_01620W_A	Ortholog of C. parapsilosis CDC317 : CPAR2_503590, Candida tenuis NRRL Y-1498 : CANTEDRAFT_115755, Debaryomyces hansenii CBS767 : DEHA2D15334g and Candida dubliniensis CD36 : CD36_81530	0	0	NE
Plate 05	F02	4059	orf19.2303	FGR16	C1_11130W_A	Protein lacking an ortholog in S. cerevisiae; transposon mutation affects filamentous growth; fluconazole-downregulated	0	0	NE
Plate 05	F03	4060	orf19.2973		C1_02850W_A	Ortholog(s) have RNA binding, flap-structured DNA binding activity and role in nuclear-transcribed mRNA poly(A) tail shortening, positive regulation of endodeoxyribonuclease activity	0	0	NE
Plate 05	F04	4061	orf19.2064		C2_00640W_A	Putative transcription factor with zinc finger DNA-binding motif	1	1	GD
Plate 05	F05	4062	orf19.2343	VPS23	C1_10760W_A	ESCRT I protein sorting complex protein; involved in proteolytic activation of Rim101, which regulates pH response; ortholog of S. cerevisiae Stp22/Vps23	0	0	NE
Plate 05	F06	4065	orf19.752		C1_04910C_A	Has domain(s) with predicted methyltransferase activity and role in metabolic process	0	0	NE
Plate 05	F07	4067	orf19.1866	VMA10	C2_07590W_A	Subunit G of the V1 peripheral membrane domain of the vacuolar H+-ATPase (V-ATPase); involved in vacuolar acidification; rat catheter biofilm repressed	0	0	NE
Plate 05	F08	4087	orf19.3170		C5_02010C_A	Ortholog(s) have role in formation of translation preinitiation complex and cytoplasm, cytosolic ribosome localization	0	0.5	GD
Plate 05	F09	4093	orf19.4577		C4_02150C_A	Ortholog(s) have GTPase activating protein binding, cAMP-dependent protein kinase inhibitor activity, signal transducer activity	0	0	NE
Plate 05	F10	4095	orf19.5250		C1_12140W_A	Has domain(s) with predicted cofactor binding, nucleotide binding activity	0	0	NE
Plate 05	F11	4097	orf19.3627		C2_08510W_A	Ortholog of C. parapsilosis CDC317 : CPAR2_406910, Candida tenuis NRRL Y-1498 : CANTEDRAFT_104937, Debaryomyces hansenii CBS767 : DEHA2D02706g and Candida dubliniensis CD36 : CD36_22640	0	0	NE
Plate 05	F12	4099	orf19.2418		CR_03080C_A	Ortholog of C. parapsilosis CDC317 : CPAR2_802530, Candida tenuis NRRL Y-1498 : CANTEDRAFT_109615, Debaryomyces hansenii CBS767 : DEHA2A12650g and Candida dubliniensis CD36 : CD36_28190	0	0	NE
Plate 05	G01	4122	orf19.1058		C1_04230W_A	Ortholog(s) have ubiquitin binding activity, role in ubiquitin-dependent protein catabolic process and proteasome regulatory particle, lid subcomplex, proteasome storage granule localization	0	0	NE
Plate 05	G02	4144	orf19.927		C5_00620W_A	Ortholog(s) have role in positive regulation of transcription from RNA polymerase II promoter, telomere maintenance and EKC/KEOPS complex, cytosol, nucleus localization	0	0	NE
Plate 05	G03	4174	orf19.4922		C1_12920C_A	Ortholog(s) have Rab GTPase binding activity and Golgi apparatus, endoplasmic reticulum localization	0	0	NE
Plate 05	G04	4179	orf19.4701		C4_00940W_A	Ortholog(s) have ATPase activity, tRNA binding activity, role in protein urmylation, regulation of transcription from RNA polymerase II promoter, tRNA wobble uridine modification and Elongator holoenzyme complex localization	0	0	NE
Plate 05	G05	4104	orf19.2564		CR_01710W_A	Ortholog(s) have role in ribosomal small subunit biogenesis and nucleolus, ribosome localization	0	0	NE
Plate 05	G06	4183	orf19.6035		C1_00700W_A	Protein of unknown function; repressed by nitric oxide	0	0	NE
Plate 05	G07	4195	orf19.4929		C1_13010W_A	Ortholog(s) have translation regulator activity and role in RNA metabolic process, aerobic respiration, mitochondrial respiratory chain complex IV biogenesis, positive regulation of mitochondrial translational initiation	0	0	NE
Plate 05	G08	4056	orf19.2961		C1_02720W_A	Putative transcription factor with zinc finger DNA-binding motif	0	0	NE
Plate 05	G09	4057	orf19.4639		C4_01460C_A	Protein present in exponential and stationary growth phase yeast cultures	0	0	NE
Plate 05	G10	4063	orf19.713		CR_06530W_A	Ortholog(s) have role in apoptotic process and cytoplasm, nucleus localization	0	0	NE
Plate 05	G11	4261	orf19.5213		C2_05910W_A	Putative protein of unknown function; transcript is upregulated in clinical isolates from HIV+ patients with oral candidiasis	0	1	GD
Plate 05	G12	4156	orf19.5646		C4_00210W_A	Ortholog of S. cerevisiae : YPL034W, C. glabrata CBS138 : CAGL0L06996g, C. parapsilosis CDC317 : CPAR2_402170 and Candida tenuis NRRL Y-1498 : CANTEDRAFT_137348	0	0	NE
Plate 05	H01	4180	orf19.273		C3_02820C_A	Ortholog(s) have unfolded protein binding activity, role in sterol biosynthetic process and endoplasmic reticulum localization	0	0	NE
Plate 05	H02	3799	orf19.4843		C1_09780C_A	Putative iron/copper reductas; involved in iron homeostasis; rat catheter and Spider biofilm induced	0	0	NE
Plate 05	H03	3874	orf19.3012	ARO80	C1_03200C_A	Zn(II)2Cys6 transcription factor; transcriptional activator of aromatic amino acid catabolism; regulator of aromatic alcohol biosynthesis via the Ehrlich pathway; mutant is viable	0	0	NE
Plate 05	H04	3918	orf19.7503	CDA2	CR_00300W_A	Putative chitin deacetylase; transcription is positively regulated by Tbf1p	0	0	NE
Plate 05	H05	3988	orf19.2308		C1_11080W_A	Putative 6-phosphofructo-2-kinase; catalyzes synthesis of fructose-2,6-bisphosphate; Hap43-repressed; flow model, rat catheter and Spider biofilm induced	0	0	NE
Plate 05	H06	4013	orf19.6869		C2_05570C_A	Putative lipid raft associated protein; Spider biofilm induced	0	0	NE
Plate 05	H07	3824	orf19.2660	EAF3	C2_08280W_A	Subunit of the NuA4 histone acetyltransferase complex; rat catheter and Spider biofilm induced	0	0	NE
Plate 05	H08	3882	orf19.577		C5_00750C_A	Predicted protein tyrosine phosphatase; rat catheter biofilm induced	0	0	NE
Plate 05	H09	4004	orf19.2400		CR_03230W_A	Ortholog(s) have role in mRNA splicing, via spliceosome, maturation of SSU-rRNA, positive regulation of ATPase activity, positive regulation of helicase activity	0	0	NE
Plate 05	H10	3540	orf19.4062	TRY2	C1_05090W_A	Transcription factor; regulator of yeast form adherence; required for yeast cell adherence to silicone substrate; Spider biofilm induced	0	0	NE
Plate 05	H11	1084	orf19.1224	FRP3	C2_06680W_A	Putative ammonium transporter; upregulated in the presence of human neutrophils; fluconazole-downregulated; repressed by nitric oxide; Spider biofilm induced	0	0	NE
Plate 05	H12	3030	orf19.1844		CR_06870C_A	Protein similar to ferric reductase Fre10p	0	0	NE
Plate 06	A01	3035	orf19.6143		CR_07250C_A	Predicted long-chain-alcohol oxidase; Spider biofilm induced	0	0	NE
Plate 06	A02	2937	orf19.2839	CIRT4B	CR_02810W_A	Cirt family transposase; transcript repressed in an azole-resistant strain that overexpresses CDR1 and CDR2; Hap43-repressed; flow model biofilm induced	0	0	NE
Plate 06	A03	2513	orf19.1568		C2_02440W_A	Ortholog(s) have Rab guanyl-nucleotide exchange factor activity, phosphatidylinositol binding activity	0	0	NE
Plate 06	A04	3482	orf19.5953		C3_04860W_A	C2H2 transcription factor; predicted regulator of ribosomal protein and biogenesis genes; possibly essential, disruptants not obtained by UAU1 method; rat catheter biofilm induced	0	0	NE
Plate 06	A05	3416	orf19.4370		CR_03710C_A	Protein of unknown function; induced by nitric oxide; oxidative stress-induced via Cap1; fungal-specific (no human or murine homolog)	0	0	NE
Plate 06	A06	3519	orf19.121	ARC18	C6_01140C_A	Putative ARP2/3 complex subunit; mutation confers hypersensitivity to cytochalasin D	0	0	NE
Plate 06	A07	3415	orf19.2881	MNN4	C4_06540W_A	Regulator of mannosylphosphorylation of N-linked mannans to cell wall proteins; no role in virulence or normal interaction with macrophages; mutant induces inflammatory cytokines in dendritic cells; rat catheter and Spider biofilm induced	2	0	NE
Plate 06	A08	3634	orf19.3226		CR_01280C_A	Ortholog(s) have role in intracellular sterol transport and fungal-type vacuole lumen localization	0	0	NE
Plate 06	A09	1319	orf19.1040	MAD2	C1_04080W_A	Protein required for the spindle assembly checkpoint of the cell cycle; necessary for survival in host cell macrophages and for virulence in a mouse model of systemic candidiasis	0	0	NE
Plate 06	A10	1416	orf19.4758		C1_09020W_A	Putative reductase or dehydrogenase; Hap43-repressed gene; alkaline repressed	0	0	NE
Plate 06	A11	3232	orf19.3986	PPR1	C5_04970C_A	Putative transcription factor with zinc cluster DNA-binding motif; has similarity to S. cerevisiae Ppr1p, which is a transcription factor involved in the regulation of uracil biosynthesis genes	#N/A	#N/A	#N/A
Plate 06	A12	3299	orf19.3237		CR_01170W_A	Ortholog(s) have cytosol, mitochondrion, nucleus localization	0	0	NE
Plate 06	B01	1581	orf19.5024	GND1	C1_13860C_A	6-phosphogluconate dehydrogenase; soluble in hyphae; farnesol, macrophage-induced protein; antigenic in mice; dual localization to cytosol and peroxisomes depends on alternative splicing; Spider biofilm repressed	0	4	E
Plate 06	B02	1570	orf19.2727	GRX3	C4_02710C_A	Putative glutaredoxin; flucytosine induced; regulated by Gcn4p; repressed in response to amino acid starvation (3-aminotriazole treatment)	0	0.75	GD
Plate 06	B03	1567	orf19.5630	APA2	C6_03410C_A	Putative ATP adenylyltransferase II; regulated by Gcn4; repressed by amino acid starvation (3-AT); induced by prostaglandins; Hap43-repressed; Spider biofilm repressed	0	0	NE
Plate 06	B04	1545	orf19.144	SNU114	C2_04640C_A	Protein similar to S. cerevisiae Snu114p, which is an RNA helicase involved in pre-mRNA splicing; likely to be essential for growth, based on an insertional mutagenesis strategy	0	4	E
Plate 06	B05	1263	orf19.3050	AGE1	C1_03480C_A	Putative GTPase activator; induced in low iron	0	0	NE
Plate 06	B06	1597	orf19.1614	MEP1	C3_02310W_A	Ammonium permease; Mep1 more efficient permease than Mep2, Mep2 has additional regulatory role; 11 predicted transmembrane regions; low mRNA abundance; hyphal downregulated; flow model biofilm induced	0	0	NE
Plate 06	B07	1622	orf19.2551	MET6	CR_01620C_A	Essential 5-methyltetrahydropteroyltriglutamate-homocysteine methyltransferase (cobalamin-independent methionine synthase); antigenic in murine/human systemic infection; heat shock, estrogen, GCN-induced; Spider biofilm repressed	0	3.5	E
Plate 06	B08	1602	orf19.1986	ARO2	CR_07710W_A	Putative chorismate synthase; fungal-specific (no human or murine homolog); protein level decreased in stationary phase yeast cultures; GlcNAc-induced protein	0	4	E
Plate 06	B09	1820	orf19.3465	RPL10A	C6_02240C_A	Predicted ribosomal protein; downregulated upon phagocytosis by murine macrophages; Hap43-induced; Spider biofilm repressed	0	4	E
Plate 06	B10	1781	orf19.1517	ARO3	C2_02030W_A	3-deoxy-D-arabinoheptulosonate-7-phosphate synthase; aromatic amino acid biosynthesis; GCN-regulated; feedback-inhibited by phenylalanine if expressed in S. cerevisiae; Aro3p and Aro4p catalyze same reaction; decreased in stationary phase	0	0	NE
Plate 06	B11	1630	orf19.3455		C6_02150C_A	Putative mitochondrial inner membrane magnesium transporter; possibly an essential gene, disruptants not obtained by UAU1 method	0	0	NE
Plate 06	B12	1908	orf19.568	SPE2	C5_00700C_A	Putative S-adenosylmethionine decarboxylase; Hap43-induced gene; possibly adherence-induced; Spider biofilm induced	0	0	NE
Plate 06	C01	1271	orf19.445		C1_05210C_A	Protein of unknown function; repressed by prostaglandins	0	0	NE
Plate 06	C02	1569	orf19.978	BDF1	C5_00200C_A	Bromodomain transcription factor; repressed upon adherence to polystyrene; reduced mRNA abundance detected in null mutant; macrophage/pseudohyphal-repressed; possibly essential, disruptants not obtained by UAU1 method	0	4	E
Plate 06	C03	1612	orf19.3175		C5_01960C_A	Putative ortholog of human electron transfer flavoprotein dehydrogenase (ETF-dH); alkaline repressed; repressed by nitric oxide; virulence-group-correlated expression; Spider biofilm induced	0	0	NE
Plate 06	C04	1696	orf19.804		C2_04180C_A	Putative mitochondrial carrier family transporter; rat catheter biofilm induced	0	0	NE
Plate 06	C05	1717	orf19.1149	MRF1	C1_11700C_A	Putative mitochondrial respiratory protein; induced by farnesol, benomyl, nitric oxide, core stress response; oxidative stress-induced via Cap1; stationary-phase enriched protein; Spider biofilm induced	0	0	NE
Plate 06	C06	1809	orf19.5220		C1_12440W_A	Putative RNA exonuclease; induced in a ssr1 null mutant	0	0	NE
Plate 06	C07	1885	orf19.5645	MET15	C4_00200C_A	O-acetylhomoserine O-acetylserine sulfhydrylase; sulfur amino acid synthesis; immunogenic; Hog1, adherence-induced; brown color of mutant in Pb(2+) medium a visual selection; chlamydospore formation induced, F-12/CO2 biofilm induced	0	0	NE
Plate 06	C08	1886	orf19.4371	TAL1	CR_03720W_A	Transaldolase; protein present in exponential and stationary growth phase yeast cultures; oxidative stress-induced via Cap1; induced by nitric oxide independent of Yhb1p; sumoylation target; rat catheter biofilm repressed	0	0	NE
Plate 06	C09	1888	orf19.58	RRP6	C1_05050C_A	Putative nuclear exosome exonuclease component; Hap43p-induced gene; mutation confers hypersensitivity to 5-fluorocytosine (5-FC), 5-fluorouracil (5-FU), and tubercidin (7-deazaadenosine)	0	1.5	GD
Plate 06	C10	1890	orf19.4754	ZWF1	C1_08980C_A	Glucose-6-phosphate dehydrogenase; antigenic in mice; activity induced by O2 or oxidizing agents H2O2, menadione, macrophage; caspofungin repressed; induced in core stress response; regulated by Gcn2, Gcn4; rat catheter biofilm repressed	0	4	E
Plate 06	C11	1892	orf19.4299	MSW1	C5_02770W_A	Protein similar to S. cerevisiae Msw1p, which is mitochondrial tryptophanyl-tRNA synthetase; Hap43p-repressed gene; likely to be essential for growth, based on an insertional mutagenesis strategy	0	0.75	GD
Plate 06	C12	1894	orf19.4306		C5_02820C_A	Ortholog(s) have role in L-methionine salvage from methylthioadenosine and cytoplasm localization	0	0	NE
Plate 06	D01	1895	orf19.4308	HSL1	C5_02840C_A	Probable protein kinase involved in determination of morphology during the cell cycle of both yeast-form and hyphal cells via regulation of Swe1p and Cdc28p; required for full virulence and kidney colonization in mouse systemic infection	0	0	NE
Plate 06	D02	1902	orf19.2580	HST2	CR_01800C_A	Putative histone deacetylase; role in regulation of white-opaque switch; Spider biofilm induced	0	0	NE
Plate 06	D03	1906	orf19.2738	SUL2	C4_02610C_A	Putative sulfate transporter; transcript negatively regulated by Sfu1; amphotericin B induced; F-12/CO2 and Spider biofilm induced	0	0	NE
Plate 06	D04	1909	orf19.578		C5_00760W_A	Ortholog(s) have Rab GTPase activator activity, role in actin filament organization and cellular bud tip, cytosol, incipient cellular bud site, polarisome localization	0	0	NE
Plate 06	D05	1910	orf19.3340	SOD2	C1_01520C_A	Mitochondrial Mn-containing superoxide dismutase; protection against oxidative stress; homotetramer active; N-terminal 34 amino acids removed on mitochondrial import; H2O2-induced via Cap1p; Hap43p-, alkaline-downregulated, farnesol-induced	0	0	NE
Plate 06	D06	208	orf19.5053		C1_07830C_A	Ortholog(s) have acetyltransferase activity, chromatin binding activity	0	1.25	GD
Plate 06	D07	209	orf19.6537		C7_01830W_A	Ortholog(s) have role in chromosome segregation and nuclear MIS12/MIND type complex, spindle pole localization	0	4	E
Plate 06	D08	1941	orf19.5610	ARG3	C6_03230W_A	Putative ornithine carbamoyltransferase; Gcn4-regulated; Hap43-induced; repressed in alkalinizing medium; rat catheter and Spider biofilm induced	0	1	GD
Plate 06	D09	1956	orf19.4807		C1_09440W_A	Ortholog(s) have inorganic diphosphatase activity, role in aerobic respiration and mitochondrion localization	0	0	NE
Plate 06	D10	1958	orf19.4813	GUA1	C1_09490C_A	Putative GMP synthase, involved in the final step of guanine biosynthesis; soluble protein in hyphae; flucytosine induced; macrophage-downregulated protein abundance; protein level decreases in stationary phase cultures	0	4	E
Plate 06	D11	1962	orf19.1362	SMM1	C2_09890W_A	Putative dihydrouridine synthase; Hap43-induced gene; rat catheter biofilm induced; Spider biofilm induced	0	0	NE
Plate 06	D12	1964	orf19.3715	ASF1	CR_07860C_A	Protein similar to S. cerevisiae Asf1p, a chromatin assembly complex component; likely to be essential for growth, based on an insertional mutagenesis strategy	0	2.75	GD
Plate 06	E01	1965	orf19.6165	KGD1	C3_00880W_A	Putative 2-oxoglutarate dehydrogenase; regulated by Efg1 under yeast but not hyphal growth conditions; transcript induced in an RHE model of oral candidiasis; stationary phase enriched protein; Hap43-repressed; rat catheter biofilm induced	0	3	E
Plate 06	E02	1974	orf19.1404		C2_09500W_A	Predicted tRNA dihydrouridine synthase; Spider biofilm induced	0	0	NE
Plate 06	E03	1989	orf19.6316		CR_04760C_A	Predicted membrane transporter, member of the L-amino acid transporter-3 (LAT3) family, major facilitator superfamily (MFS)	0	0	NE
Plate 06	E04	1995	orf19.2333		C1_10840C_A	Ortholog(s) have role in retrograde transport, endosome to Golgi and cytosol, late endosome, nucleus localization	0	0	NE
Plate 06	E05	2010	orf19.3983		C5_04950C_A	Protein with a predicted transcription factor BTF3 domain; flow model biofilm induced	0	0	NE
Plate 06	E06	2014	orf19.2987		C1_02960C_A	Ortholog(s) have role in cellular ion homeostasis, mitochondrion inheritance, regulation of cardiolipin metabolic process and mitochondrial inner membrane, nucleus localization	0	0.75	GD
Plate 06	E07	2030	orf19.3131	OYE32	C4_06780C_A	NAD(P)H oxidoreductase family protein; induced by nitric oxide, amphotericin B, oxidative stress via Cap1; upregulation associated with MDR1 overexpression or benomyl treatment; macrophage-downregulated protein; Spider biofilm induced	0	0	NE
Plate 06	E08	2105	orf19.4031		C5_05360C_A	Ortholog(s) have cytoplasm localization	0	0	NE
Plate 06	E09	2106	orf19.4035	PGA4	C5_05390C_A	GPI-anchored cell surface protein; beta-1,3-glucanosyltransferase with similarity to the A. fumigatus GEL family; transcript induced in RHE model of oral candidiasis; fluconazol-induced	0	0	NE
Plate 06	E10	2107	orf19.4040	ILV3	C5_05410C_A	Dihydroxyacid dehydratase; repressed by nitric oxide; macrophage-induced protein; protein in exponential and stationary growth phase; Sef1, Sfu1p, Hap43-regulated; farnesol-repressed; flow model biofilm induced; Spider biofilm repressed	0	0.5	GD
Plate 06	E11	2148	orf19.3038	TPS2	C1_03380W_A	Trehalose-6-phosphate (Tre6P) phosphatase; mutant heat sensitive, accumulates Tre6P, decreased mouse virulence; possible drug target; 2 conserved phospohydrolase motifs; no mammalian homolog; Hap43-repressed; flow model biofilm induced	0	0	NE
Plate 06	E12	2162	orf19.7016	PHM5	C7_00980W_A	Ortholog(s) have endopolyphosphatase activity, exopolyphosphatase activity, role in polyphosphate catabolic process and fungal-type vacuole membrane, nucleus localization	0	0	NE
Plate 06	F01	1878	orf19.2871	SDH12	C4_06610C_A	Succinate dehydrogenase; soluble protein in hyphae; macrophage-downregulated protein level; downregulated by Efg1p; repressed by nitric oxide; protein present in exponential and stationary growth phase yeast cultures; Hap43p-repressed gene	0	0	NE
Plate 06	F02	1896	orf19.5702		C6_03430C_A	Ortholog(s) have cell division site, spindle localization	0	0	NE
Plate 06	F03	1969	orf19.1576		C2_02520W_A	Ortholog(s) have nuclear localization sequence binding, ubiquitin binding activity, role in response to ethanol and cytosol localization	0	0	NE
Plate 06	F04	1991	orf19.6324	VID27	C6_00130C_A	Protein similar to S. cerevisiae Vid27p; transposon mutation affects filamentous growth; mutation confers hypersensitivity to toxic ergosterol analog; fungal-specific (no human or murine homolog)	0	0	NE
Plate 06	F05	1993	orf19.2337	ALP1	C1_10800C_A	Cystine transporter; present in pathogenic yeasts (no human or murine homolog); Spider biofilm induced	0	0	NE
Plate 06	F06	2137	orf19.5243	TRP3	C1_12210W_A	Putative bifunctional enzyme with predicted indole-3-glycerol-phosphate synthase and anthranilate synthase activities; regulated by Gcn2p and Gcn4p	0	4	E
Plate 06	F07	1913	orf19.2107	MUQ1	C2_00260C_A	Putative choline phosphate cytidylyltransferase/phosphoethanolamine cytidylyltransferase; repressed in hyphae compared vs yeast; Hap43-repressed; flow model biofilm induced; Spider biofilm repressed	0	0	NE
Plate 06	F08	1915	orf19.5628		C6_03390W_A	Mitochondrial dicarboxylate transporter; possibly an essential gene, disruptants not obtained by UAU1 method	0	0	NE
Plate 06	F09	1920	orf19.1720		C3_01310W_A	Ortholog(s) have role in mitotic recombination	0	0	NE
Plate 06	F10	1928	orf19.2844		CR_02870W_A	Predicted gamma-adaptin, large subunit of the clathrin-associated protein (AP-1) complex; that binds clathrin and is involved in vesicle mediated transport; induced in core caspofungin response	0	0	NE
Plate 06	F11	1932	orf19.4518		C2_04360W_A	Protein kinase of unknown function; mutants are viable	1.5	0	NE
Plate 06	F12	1935	orf19.3330	CRL1	C1_01420C_A	Predicted GTPase of RHO family; CAAX motif geranylgeranylated; expression in S. cerevisiae causes dominant-negative inhibition of pheromone response	0	0	NE
Plate 06	G01	1937	orf19.3325		C1_01360C_A	Putative glycogen synthesis initiator; regulated by Efg1 and Efh1; Hog1-repressed; colony morphology-related gene regulation by Ssn6; induced by prostaglandins; flow model biofilm induced	0	0	NE
Plate 06	G02	1228	orf19.3467		C6_02260C_A	Ortholog(s) have ubiquitin binding activity and role in ER to Golgi vesicle-mediated transport, late endosome to vacuole transport via multivesicular body sorting pathway, retrograde vesicle-mediated transport, Golgi to ER	0	4	E
Plate 06	G03	19	orf19.4441		C1_07260C_A	Ortholog(s) have DNA replication origin binding, double-stranded DNA binding, single-stranded DNA binding activity	0	3	GD
Plate 06	G04	1439	orf19.2133	LIP4	C6_04490W_A	Secreted lipase, member of a differentially expressed lipase gene family with possible roles in nutrition and/or in creating an acidic microenvironment; expressed more strongly during mucosal infections than during systemic infections	0	0	NE
Plate 06	G05	1082	orf19.3854		CR_06040W_A	Ortholog of S. cerevisiae Sat4; amphotericin B induced; clade-associated gene expression; Spider biofilm induced	0	0	NE
Plate 06	G06	1086	orf19.6730		C3_07600W_A	Ortholog(s) have nucleolus localization	0	0	NE
Plate 06	G07	1089	orf19.4526	HSP30	C1_01990W_A	Putative heat shock protein; fluconazole repressed; amphotericin B induced; Spider biofilm induced; rat catheter biofilm induced	0	0	NE
Plate 06	G08	1092	orf19.5994	RHB1	C3_05180W_A	Putative small G protein from the Ras superfamily involved in cell wall integrity and control of filamentous growth under nitrogen starvation	0	0	NE
Plate 06	G09	1094	orf19.5671		C4_00420C_A	Ortholog(s) have role in actin cortical patch assembly, septin cytoskeleton organization and cellular bud neck, cellular bud tip, mating projection base, mating projection tip localization	0	0	NE
Plate 06	G10	1095	orf19.908	FEN12	C2_03230C_A	Putative protein with a predicted role in the elongation of fatty acids; amphotericin B, caspofungin repressed	0	0	NE
Plate 06	G11	1099	orf19.7463		CR_00660W_A	Ortholog(s) have role in ascospore wall assembly and ascospore wall, nuclear envelope localization	0	0	NE
Plate 06	G12	1101	orf19.1966	BUD23	C5_01060C_A	Putative methyltransferase; Hap43-induced; repressed by prostaglandins	0	4	E
Plate 06	H01	1107	orf19.3407		C6_01770W_A	Putative transcription factor with zinc finger DNA-binding motif; Hap43p-repressed gene	0	0	NE
Plate 06	H02	1050	orf19.2443	RGD1	C1_06020W_A	GTPase activator protein; transcript induced in low iron; alkaline upregulated; localized to the bud emergence area in G1 phase and in the bud tip during S and G2 phases	0	0	NE
Plate 06	H03	1085	orf19.459	ADP1	CR_05950C_A	Putative PDR-subfamily ABC transporter; similar to WHITE subfamily proteins; gene used for strain identification by multilocus sequence typing	0	0	NE
Plate 06	H04	1088	orf19.7330		CR_09350C_A	Protein with a predicted heme oxygenase domain; Spider biofilm induced	0	0	NE
Plate 06	H05	1219	orf19.1671	UTR2	C3_01730C_A	Putative GPI anchored cell wall glycosidase; role in adhesion, hyphal growth on Spider (not serum) medium; chitin-binding, glycosyl hydrolase domains; induced during cell wall regeneration; mRNA in yeast-form cells; Spider biofilm induced	0	0	NE
Plate 06	H06	1334	orf19.6578		C7_01510W_A	Predicted membrane transporter; vesicular neurotransmitter (VNT) family, major facilitator superfamily (MFS); repressed in core caspofungin response; induced in oralpharyngeal candidasis; Spider biofilm induced	0	0	NE
Plate 06	H07	251	orf19.6740		C3_07480W_A	Ortholog(s) have ubiquitin-protein ligase activity and role in generation of catalytic spliceosome for first transesterification step	0	0	NE
Plate 06	H08	1509	orf19.308		C3_03110W_A	Ortholog(s) have role in nucleobase-containing compound transport and plasma membrane localization	0	0	NE
Plate 06	H09	123	orf19.1988	CDC45	CR_07720C_A	Putative DNA replication initiation factor; transcriptionally regulated by interaction with macrophage	0	3.5	E
Plate 06	H10	1146	orf19.2965		C1_02760W_A	Putative guanyl-nucleotide exchange factor; Spider biofilm repressed	0	0	NE
Plate 06	H11	1147	orf19.4160		C4_00810C_A	Ortholog(s) have serine-type endopeptidase activity, role in mitochondrial tRNA threonylcarbamoyladenosine modification and mitochondrion localization	0	0	NE
Plate 06	H12	1149	orf19.4001		C5_05090W_A	Ortholog(s) have role in protein insertion into mitochondrial membrane from inner side and extrinsic to mitochondrial inner membrane, mitochondrial matrix localization	0	0	NE
Plate 07	A01	1150	orf19.5038		C4_03830W_A	Predicted tRNA (guanine) methyltransferase activity; Spider biofilm induced	0	0	NE
Plate 07	A02	1152	orf19.6498		C7_02170C_A	Ortholog(s) have role in cellular protein complex localization, nucleocytoplasmic transport and DNA-directed RNA polymerase II, holoenzyme, cytoplasm localization	0	0	NE
Plate 07	A03	1154	orf19.1804		CR_04920W_A	Ortholog(s) have mitochondrion localization	0	0	NE
Plate 07	A04	1156	orf19.3606		C2_08700C_A	Ortholog of S. cereviae Sna4 vacuolar outer membrane protein that plays a role in sensitivity to NA+; induced by Mnl1 under weak acid stress	0	0	NE
Plate 07	A05	1158	orf19.2341	HNT1	C1_10780C_A	Protein with similarity to protein kinase C inhibitor-I; protein level decreases in stationary phase cultures	0	0	NE
Plate 07	A06	1161	orf19.7188	RPP1B	C7_03920C_A	Conserved acidic ribosomal protein, likely involved in regulation of translation elongation; interacts with Rpp2A; 1 of 4 similar C. albicans ribosomal proteins (Rpp1A, Rpp1B, Rpp2A, Rpp2B); induced by Tbf1; Spider biofilm repressed	0	0	NE
Plate 07	A07	1163	orf19.1683	PPH21	C3_01600W_A	Putative protein phosphatase of the Type 2A-related family (serine/threonine-specific), similar to S. cerevisiae Pph21p; caspofungin repressed; possibly an essential gene, disruptants not obtained by UAU1 method	0	0	NE
Plate 07	A08	1620	orf19.5061	ADE5,7	C1_07890C_A	Phosphoribosylamine-glycine ligase and phosphoribosylformylglycinamidine cyclo-ligase; interacts with Vps34p; required for hyphal growth and virulence; flucytosine induced; not induced in GCN response, in contrast to S. cerevisiae ortholog	0	3.25	E
Plate 07	A09	1275	orf19.955		C5_00340W_A	Protein of unknown function; Spider biofilm repressed	0	2.25	GD
Plate 07	A10	1251	orf19.6901		C7_01190W_A	Ortholog(s) have enzyme activator activity, m7G(5')pppN diphosphatase activity	0	0	NE
Plate 07	A11	1246	orf19.6994	BAT22	C3_05590C_A	Putative branched chain amino acid aminotransferase; regulated by Gcn4p; induced by farnesol treatment, GlcNAc, amino acid starvation (3-aminotriazole treatment); present in exponential and stationary growth phase yeast cultures	0	0	NE
Plate 07	A12	1247	orf19.7520	POT1	CR_00150C_A	Putative peroxisomal 3-oxoacyl CoA thiolase; transcript regulated by Nrg1 and Mig1; farnesol regulated; Hap43-repressed	0	0	NE
Plate 07	B01	1248	orf19.3006		C1_03130C_A	Protein involved in Golgi trafficking; Spider biofilm repressed	0	0	NE
Plate 07	B02	1249	orf19.2166	VMA5	C2_08190W_A	Putative vacuolar H(+)-ATPase; plasma membrane localized	0	0	NE
Plate 07	B03	1436	orf19.3711		CR_07820W_A	Protein with monooxygenase domains; flow model biofilm induced	0	0	NE
Plate 07	B04	1266	orf19.968	PGA14	C5_00270W_A	Putative GPI-anchored protein; induced during cell wall regeneration; regulated by Ssn6p	0	0	NE
Plate 07	B05	1350	orf19.118	FAD2	C6_01110W_A	Delta-12 fatty acid desaturase, involved in production of linoleic acid, which is a major component of membranes	0	0	NE
Plate 07	B06	1148	orf19.4000	GRF10	C5_05080W_A	Putative homeodomain transcription factor; null mutant is an adenine auxotroph; Spider biofilm induced; promoter bound by Bcr1, Tec1, Efg1, Ndt80 and Brg1	0	0	NE
Plate 07	B07	1151	orf19.6502		C7_02130W_A	Short-chain dehydrogenase/reductase; upregulation correlates with clinical development of fluconazole resistance	0	0	NE
Plate 07	B08	1226	orf19.3911	SAH1	C5_04270C_A	S-adenosyl-L-homocysteine hydrolase; sulfur amino acid metabolism; antigenic in human; alkaline-, fluconazole-induced expression; Gcn4-regulated; amino acid starvation (3-AT) repressed; flow model biofilm induced; Spider biofilm repressed	0	0.5	GD
Plate 07	B09	1279	orf19.1970		C5_01000C_A	Putative vacuole biogenesis protein	0	0	NE
Plate 07	B10	1286	orf19.5966		C3_04980W_A	Ortholog of Candida albicans WO-1 : CAWG_02810	0	0	NE
Plate 07	B11	1295	orf19.4416	VPS13	C4_06060W_A	Putative vacuolar protein sorting-associated protein; gene used for multilocus sequence typing	0	0	NE
Plate 07	B12	1526	orf19.7332	ELF1	CR_09370W_A	Putative mRNA export protein; Walker A and B (ATP/GTP binding) motifs; required for wild-type morphology, growth; expressed in hyphal, pseudohyphal, and yeast form; Hap43-induced; Spider and flow model biofilm induced	0	0	NE
Plate 07	C01	135	orf19.7011		C7_01030C_A	Ortholog(s) have 90S preribosome, nucleus, spindle pole body localization	0	4	E
Plate 07	C02	1520	orf19.4889		C1_10200C_A	Predicted MFS family membrane transporter, member of the drug:proton antiporter (12 spanner) (DHA1) family; Spider biofilm induced	0	0	NE
Plate 07	C03	1608	orf19.1977	URA4	C5_00900C_A	Dihydroorotase; protein present in exponential and stationary growth phase yeast cultures	0	4	E
Plate 07	C04	1467	orf19.5234	RBD1	C1_12290C_A	Rhomboid-like protein; similar to putative intramembrane serine proteases; role in filamentous growth; Gcn4-regulated; caspofungin repressed; Spider biofilm induced	0	0	NE
Plate 07	C05	1454	orf19.4856	LIP3	C1_09900W_A	Secreted lipase; gene family member whose members are expressed differentially in response to carbon source and infection; possible role in nutrition and/or in creating an acidic microenvironment; flow model biofilm induced	0	0	NE
Plate 07	C06	1648	orf19.1949	VPS1	C5_01210W_A	Dynamin-family GTPase-related protein; induced upon adherence to polystyrene; regulated by Gcn2p and Gcn4p	0	0	NE
Plate 07	C07	1649	orf19.691	GPD2	C6_02010C_A	Surface protein similar to glycerol 3-P dehydrogenase; binds host Factor H, FHL-1, plasminogen; regulated by Ssn6, Nrg1, Efg1; induced by cell wall regeneration, macrophage/pseudohyphal growth, core stress response; Spider biofilm induced	0	0	NE
Plate 07	C08	1652	orf19.1747	KIP2	C2_10310C_A	Putative kinesin-related motor protein involved in mitotic spindle positioning; repressed by alpha pheromone in SpiderM medium; periodic mRNA expression, peak at cell-cycle G2/M phase	0	0	NE
Plate 07	C09	1653	orf19.3526	ITR1	C2_04940C_A	MFS inositol transporter; uptake of exogenous inositol; 12 transmembrane motifs; expressed in rich medium; fluconazole, caspofungin repressed; possibly essential (UAU1 method); flow model, rat catheter and Spider biofilm induced	0	0	NE
Plate 07	C10	1656	orf19.4736		C1_08780W_A	Ortholog(s) have alkaline phosphatase activity, nucleotide phosphatase activity, role in nicotinamide nucleotide metabolic process, protein dephosphorylation and fungal-type vacuole membrane localization	0	0	NE
Plate 07	C11	1355	orf19.7396		C3_06140W_A	Protein of unknown function; Spider biofilm induced; Hap43-repressed	0	0	NE
Plate 07	C12	1356	orf19.873		C2_03480C_A	Ortholog of Candida albicans WO-1 : CAWG_04115	0	0	NE
Plate 07	D01	1359	orf19.4461		C1_03880C_A	Ortholog of Candida albicans WO-1 : CAWG_01005	0	0	NE
Plate 07	D02	1443	orf19.314		C3_03150W_A	Ortholog of S. cerevisiae : STB6, C. glabrata CBS138 : CAGL0L05016g, C. parapsilosis CDC317 : CPAR2_103210, Candida tenuis NRRL Y-1498 : CANTEDRAFT_133418 and Debaryomyces hansenii CBS767 : DEHA2G08382g	0	0	NE
Plate 07	D03	1461	orf19.6569		C7_01570C_A	Predicted transmembrane transporter; induced during chlamydospore formation in both C. albicans and C. dubliniensis	0	0	NE
Plate 07	D04	1474	orf19.5337	UBC15	C2_10580W_A	Putative E2 ubiquitin-conjugating enzyme	0	0	NE
Plate 07	D05	1507	orf19.5079	CDR4	C1_08070W_A	Putative ABC transporter superfamily; fluconazole, Sfu1, Hog1, core stress response induced; caspofungin repressed; fluconazole resistance not affected by mutation or correlated with expression; rat catheter and flow model biofilm induced	0	0	NE
Plate 07	D06	1508	orf19.6060	GCN20	C1_00480C_A	YEF3-subfamily ABC family protein, predicted not to be a transporter	0	0	NE
Plate 07	D07	1281	orf19.635		CR_04980C_A	Protein of unknown function; induced by alpha pheromone in SpiderM medium	0	0	NE
Plate 07	D08	1283	orf19.1606		C3_02390W_A	Protein of unknown function; Plc1-regulated	0	0	NE
Plate 07	D09	1285	orf19.5727		C6_03590C_A	Ortholog of C. parapsilosis CDC317 : CPAR2_601230, Candida tenuis NRRL Y-1498 : CANTEDRAFT_115908, Debaryomyces hansenii CBS767 : DEHA2E12540g and Candida dubliniensis CD36 : CD36_64130	0	0	NE
Plate 07	D10	1014	orf19.2172	ARA1	C2_08130W_A	D-Arabinose dehydrogenase; dehydro-D-arabinono-1,4-lactone synthesis; active on D-arabinose, L-fucose, L-xylose, L-galactose; inhibited by metal ions, thiol group-specific reagents; induced on polystyrene adherence; Spider biofilm induced	0	0	NE
Plate 07	D11	1054	orf19.4534		C1_01890C_A	Putative UBX-domain (ubiquitin-regulatory domain) protein; macrophage-downregulated gene	0	0	NE
Plate 07	D12	1055	orf19.3613		C2_08630C_A	Ortholog(s) have RNA polymerase II core binding, RNA polymerase II core promoter sequence-specific DNA binding transcription factor activity, TFIIF-class binding transcription factor activity, chromatin binding activity	0	0	NE
Plate 07	E01	1057	orf19.3064	MRPL27	C1_03650C_A	Putative 60S ribosomal protein L27, mitochondrial precursor	0	3.5	E
Plate 07	E02	1060	orf19.1204		C6_00430C_A	Phosphorylated protein of unknown function; transcript is upregulated clinical isolates from HIV positive patients with oral candidiasis	0	0	NE
Plate 07	E03	1063	orf19.4599	PHO89	C4_01940W_A	Putative phosphate permease; transcript regulated upon white-opaque switch; alkaline induced by Rim101; possibly adherence-induced; F-12/CO2 model, rat catheter and Spider biofilm induced	0	0	NE
Plate 07	E04	1064	orf19.3981	MAL31	C5_04930C_A	Putative high-affinity maltose transporter; transcript is upregulated in clinical isolates from HIV+ patients with oral candidiasis; alkaline induced; Spider biofilm induced	0	0	NE
Plate 07	E05	1067	orf19.7074		C7_00450C_A	Ortholog(s) have RNA polymerase II transcription factor recruiting transcription factor activity, methylated histone residue binding activity	0	0	NE
Plate 07	E06	1068	orf19.7083	DCC1	C7_00370W_A	Protein with a predicted role in sister chromatid cohesion and telomere length maintenance; cell-cycle regulated periodic mRNA expression	0	0	NE
Plate 07	E07	1072	orf19.3292		C1_01040W_A	Ortholog(s) have peptide-methionine (R)-S-oxide reductase activity, role in cellular response to oxidative stress and cytosol, mitochondrion, nucleus localization	0	0	NE
Plate 07	E08	1075	orf19.734	GLK1	CR_07150W_A	Putative glucokinase; transcript regulated upon yeast-hyphal switch; Efg1 regulated; fluconazole-induced; induced in core stress response; colony morphology-related gene regulation by Ssn6; GlcNAc-induced protein	0	0	NE
Plate 07	E09	1076	orf19.4953		C1_13270W_A	Putative ATPase; predicted role in ER-associated protein catabolism; induced during chlamydospore formation in both C. albicans and C. dubliniensis	0	0	NE
Plate 07	E10	1077	orf19.3736	KAR4	CR_02330C_A	Transcription factor; required for gene regulation in response to pheromones; ortholog of S. cerevisiae Kar4; role in karyogamy; opaque-specific, a-specific; induced by alpha factor	0	0	NE
Plate 07	E11	1080	orf19.7404		C3_06280W_A	Catabolic L-serine (L-threonine) deaminase;, catalyzes degradation of L-serine and L-threonine; required to use serine or threonine as a sole nitrogen source; Spider biofilm repressed	0	0	NE
Plate 07	E12	1081	orf19.548	CDC10	CR_04570C_A	Septin, required for wild-type cell, hyphal, or chlamydospore morphology; role in virulence and kidney tissue invasion in mouse infection; forms ring at sites of cell division and filaments in mature chlamydospore; Spider biofilm repressed	0	0	NE
Plate 07	F01	1695	orf19.807	CHS5	C2_04140W_A	Putative chitin biosynthesis protein; fungal-specific (no human or murine homolog); transcription decreases upon yeast-to-hyphal switch	0	0	NE
Plate 07	F02	1488	orf19.7522		CR_00130C_A	Protein with a pyridoxal phosphate-dependent transferase domain; Hap43-repressed; mutation confers hypersensitivity to amphotericin B; Spider biofilm repressed	0	0	NE
Plate 07	F03	1873	orf19.2194		C2_07880W_A	Phosphorylated protein of unknown function	0	0	NE
Plate 07	F04	1874	orf19.2193	PRS5	C2_07890W_A	Putative 5-phospho-ribosyl-1(alpha)-pyrophosphate synthetase; Hap43-induced; repressed during core stress response	0	0	NE
Plate 07	F05	1876	orf19.3507	MCR1	C6_02040W_A	Putative NADH-cytochrome-b5 reductase; soluble protein in hyphae; biofilm induced; alkaline downregulated; ketoconazole or flucytosine induced, farnesol-induced; protein present in exponential and stationary growth phase yeast cultures	0	0	NE
Plate 07	F06	1877	orf19.1795	PUF3	C4_05370W_A	Ortholog os S. cerevisiae Puf3; mRNA-binding protein involved in RNA catabolism; mutant is viable	0	0	NE
Plate 07	F07	1883	orf19.5640	PEX5	C4_00150C_A	Pex5p family protein; required for PTS1-mediated peroxisomal protein import, fatty acid beta-oxidation; similar to S. cerevisiae Pas10p peroxisomal targeting receptor; macrophage/pseudohyphal-repressed; Hap43p-repressed	0	0	NE
Plate 07	F08	525	orf19.6176	SEC61	C3_07810C_A	ER protein-translocation complex subunit; essential; 10 predicted transmembrane regions; chimeric mutant partially functionally complements S. cerevisiae sec61 defects; Spider biofilm repressed	0	1	GD
Plate 07	F09	524	orf19.3681		C1_02240W_A	Ortholog(s) have Ran guanyl-nucleotide exchange factor activity, protein transporter activity	0	1	GD
Plate 07	F10	471	orf19.150	TIM17	C2_04680W_A	Predicted component of the Translocase of the Inner Mitochondrial membrane (TIM23 complex), involved in protein import into mitochondria	0	4	E
Plate 07	F11	537	orf19.2967	TIF34	C1_02790W_A	Putative translation initiation factor eIF3, p39 subunit; mutation confers hypersensitivity to roridin A, verrucarin A; downregulated upon phagocytosis by murine macrophages; Spider biofilm repressed	0	3.25	E
Plate 07	F12	540	orf19.1578		C2_02540W_A	Ortholog of S. cereviaie Rrp5, an RNA binding protein involved in synthesis of 18S and 5.8S rRNAs; Hap43-induced gene	0	0	NE
Plate 07	G01	430	orf19.2694	TYS1	C4_02980W_A	Putative tRNA-Tyr synthetase; downregulated upon phagocytosis by murine macrophages; stationary phase enriched protein; Spider biofilm repressed	0	4	E
Plate 07	G02	424	orf19.1261	CGT1	C4_05760W_A	mRNA 5' guanylyltransferase; small subunit of mRNA capping enzyme; binds an RNA Pol II C-terminal domain peptide; Cet1p and Cgt1p form a 2:1 complex; functional homolog of S. cerevisiae Ceg1p	0	3	E
Plate 07	G03	413	orf19.4367	SMC1	CR_03680C_A	Protein similar to chromosomal ATPases; RNA abundance regulated by tyrosol and cell density; cell-cycle regulated periodic mRNA expression	0	4	E
Plate 07	G04	436	orf19.4577.3	TIM10	C4_02140C_A	Predicted protein of the mitochondrial intermembrane space with role in protein import into mitochondrial inner membrane	0	3.5	E
Plate 07	G05	467	orf19.5623	ARP4	C6_03350C_A	Subunit of the NuA4 histone acetyltransferase complex	0	3.5	E
Plate 07	G06	464	orf19.1335		C7_03400C_A	Ortholog of S. cerevisiae Mtr4, an ATP-dependent 3'-5' RNA helicase of the DEAD-box family; Hap43-induced gene; Spider biofilm induced	0	4	E
Plate 07	G07	532	orf19.7307		CR_09110C_A	Putative oxidoreductase; similar to S. cerevisiae Pga3p; possible Kex2p substrate	0	0	NE
Plate 07	G08	536	orf19.6355		C1_12680W_A	Ortholog(s) have role in ribosome biogenesis and cytosol, nucleolus localization	0	1	GD
Plate 07	G09	530	orf19.7335	PRE8	CR_09380W_A	Putative alpha-2_sc subunit of proteasome; macrophage-induced protein; regulated by Gcn2p and Gcn4p; transcription is positively regulated by Tbf1p; stationary phase enriched protein	0	4	E
Plate 07	G10	539	orf19.4799		C1_09370W_A	Putative mRNA splicing factor; ortholog is essential in S. cerevisiae; Spider biofilm induced	0	4	E
Plate 07	G11	534	orf19.6908		C7_01280C_A	Dihydrofolate synthetase involved in folic acid biosynthesis	0	0	NE
Plate 07	G12	469	orf19.7222	PAM16	C1_14150C_A	Putative maltase; regulated by Gcn4; repressed by amino acid starvation (3-AT); rat catheter biofilm induced	0	4	E
Plate 07	H01	466	orf19.262	SMC3	C3_02700W_A	Protein similar to S. cerevisiae Smc3p, which is an ATPase involved in sister chromatid cohesion; likely to be essential for growth, based on an insertional mutagenesis strategy	0	3	E
Plate 07	H02	461	orf19.3259		CR_00990W_A	Ortholog(s) have peptidase activity, role in protein targeting to ER, signal peptide processing and signal peptidase complex localization	0	0	NE
Plate 07	H03	421	orf19.5184		C7_02780W_A	Putative Ran guanyl-nucleotide exchange factor; probable signal transducer; Spider biofilm repressed	0	4	E
Plate 07	H04	268	orf19.4993	SEC18	C1_13580W_A	Functional homolog of S. cerevisiae Sec18p, which acts in protein transport; conserved ATP binding site; not glycosylated	0	4	E
Plate 07	H05	463	orf19.4004	CCT3	C5_05120W_A	Putative cytosolic chaperonin Cct ring complex subunit; mutation confers hypersensitivity to cytochalasin D	0	4	E
Plate 07	H06	433	orf19.6649	BRF1	CR_05650W_A	Component of the general transcription factor for RNA polymerase III (TFIIIB); possibly an essential gene, disruptants not obtained by UAU1 method	0	4	E
Plate 07	H07	531	orf19.7552		CR_09800C_A	Putative U3-containing small subunit processome complex protein; Hap43-induced gene; repressed in core stress response; Spider biofilm induced	0	3.5	E
Plate 07	H08	171	orf19.718	RRN11	CR_06480C_A	Putative RNA polymerase I subunit; rat catheter biofilm induced; Spider biofilm induced	0	0	NE
Plate 07	H09	272	orf19.3541	ERF1	C2_05100C_A	Putative translation release factor 1, which interacts with stop codons and promotes release of nascent peptides from ribosomes; Hap43p-induced gene	0	4	E
Plate 07	H10	277	orf19.3873	ARC40	CR_06180W_A	Protein similar to S. cerevisiae Arc40; involved in actin filament organization in S. cerevisiae; transposon mutation affects filamentous growth; Spider biofilm repressed	0	0	NE
Plate 07	H11	400	orf19.213		C2_08930W_A	Ortholog(s) have role in ubiquitin-dependent protein catabolic process and nucleus, proteasome regulatory particle, lid subcomplex, proteasome storage granule localization	0	4	E
Plate 07	H12	401	orf19.1283	MEC1	C5_04060C_A	Cell cycle checkpoint protein with a role in genome integrity; RNA abundance regulated by tyrosol and cell density	0	0	NE
Plate 08	A01	404	orf19.5959	NOP14	C3_04900W_A	Putative nucleolar protein; Hap43-induced; mutation confers resistance to 5-fluorocytosine (5-FC), 5-fluorouracil (5-FU), and tubercidin (7-deazaadenosine); heterozygous mutant is resistant to parnafungin; Spider biofilm induced	0	4	E
Plate 08	A02	452	orf19.6652	DBP8	CR_05630W_A	Protein similar to S. cerevisiae Dbp8p, an ATP-dependent helicase involved in rRNA processing; oxidative stress-repressed via Cap1p; flucytosine repressed; likely to be essential for growth, based on insertional mutagenesis	0	4	E
Plate 08	A03	455	orf19.1248		C4_05630W_A	Putative RNA polymerase II subunit B44; heterozygous null mutant exhibits resistance to parnafungin in the C. albicans fitness test; Spider biofilm repressed	0	4	E
Plate 08	A04	456	orf19.5260	RPN2	C1_12050W_A	Putative 26S proteasome subunit; transcript regulated by Mig1; caspofungin repressed; regulated by Gcn2 and Gcn4; gene used for strain identification by multilocus sequence typing	0	4	E
Plate 08	A05	457	orf19.5685	THS1	C5_00110C_A	Putative threonyl-tRNA synthetase; transcript regulated by Mig1 and Tup1; repressed upon phagocytosis by murine macrophages; stationary phase enriched protein; Spider biofilm repressed	0	4	E
Plate 08	A06	393	orf19.3052	YPT1	C1_03500W_A	Functional homolog of S. cerevisiae Ypt1p, which is an essential small Ras-type GTPase involved in protein secretion at ER-to-Golgi; dominant-negative mutation causes SAP secretion defect and accumulation of intracellular secretory vesicles	0	4	E
Plate 08	A07	596	orf19.487	SPT14	CR_04040C_A	Putative DNA-binding transcription factor; predicted role in regulation of biogenesis of the cell wall; upregulated in biofilm; protein newly produced during adaptation to the serum	0	0	NE
Plate 08	A08	716	orf19.6584	PRT1	C7_01450C_A	Putative translation initiation factor eIF3; mutation confers hypersensitivity to roridin A, verrucarin A; genes encoding ribosomal subunits, translation factors, tRNA synthetases are downregulated upon phagocytosis by murine macrophages	0	0	NE
Plate 08	A09	590	orf19.538		CR_04470W_A	Ortholog(s) have role in GPI anchor biosynthetic process and glycosylphosphatidylinositol-N-acetylglucosaminyltransferase (GPI-GnT) complex localization	0	3	E
Plate 08	A10	653	orf19.747	NBP35	C4_05170C_A	Similar to nucleotide-binding proteins; increased transcription is observed upon benomyl treatment; transcription is induced upon filamentous growth	0	3	E
Plate 08	A11	707	orf19.544.1	PRE6	CR_04550W_A	Putative alpha-4 subunit of the proteasome; reported as macrophage-induced protein and macrophage/pseudohyphal-repressed gene; regulated by Gcn2p and Gcn4p; removed from/reinstated in Assembly 20 (see Locus History)	0	4	E
Plate 08	A12	715	orf19.485		CR_04020C_A	Ortholog(s) have structural constituent of cytoskeleton activity	0	4	E
Plate 08	B01	652	orf19.4775	CTA8	C1_09170W_A	Essential transcription factor, mediates heat shock transcriptional induction; in the absence of heat stress, Cta8p levels are modulated by growth temperature to regulate basal expression of genes involved in protein folding	0	4	E
Plate 08	B02	271	orf19.3540	MAK5	C2_05090W_A	Putative nucleolar DEAD-box RNA helicase; oxidative stress-repressed via Cap1; repressed by prostaglandins	0	3.5	E
Plate 08	B03	300	orf19.1674	CDC53	C3_01700W_A	Cullin, a scaffold subunit of the SCF ubiquitin-ligase complexes; depletion leads to increased filamentous growth and premature cell death	0	0.75	GD
Plate 08	B04	709	orf19.1701	RKI1	C3_01480C_A	Ortholog(s) have ribose-5-phosphate isomerase activity, role in pentose-phosphate shunt, pyridoxine biosynthetic process and cytoplasm, nucleus localization	0	0	NE
Plate 08	B05	411	orf19.7261		C1_14440C_A	Putative Rab GDP-dissociation inhibitor; GlcNAc-induced protein; Spider biofilm repressed	0	3.5	E
Plate 08	B06	255	orf19.2105		C2_00280C_A	Putative pre-mRNA-splicing factor; possibly an essential gene, disruptants not obtained by UAU1 method	0	3.5	E
Plate 08	B07	270	orf19.1282	CKS1	C5_04070C_A	Ortholog(s) have histone binding, protein kinase activator activity, ubiquitin binding activity	0	0	NE
Plate 08	B08	335	orf19.2677		C4_03130W_A	Putative GPI transamidase component; possibly an essential gene, disruptants not obtained by UAU1 method	0	3	E
Plate 08	B09	403	orf19.4032	RPN5	C5_05380W_A	Putative COP9 signalosome component; macrophage/pseudohyphal-repressed	0	4	E
Plate 08	B10	275	orf19.536		CR_04450C_A	Ortholog(s) have chromatin binding, protein complex scaffold, ubiquitin binding activity and role in histone acetylation, transcription from RNA polymerase II promoter	0	4	E
Plate 08	B11	656	orf19.2611	MCM6	CR_02110W_A	Putative MCM DNA replication initiation complex component; mRNA expression peak at cell-cycle M/G1 phase; regulated by tyrosol and cell density; repressed by alpha pheromone in SpiderM medium; Hap43-induced gene	0	4	E
Plate 08	B12	657	orf19.7057		C7_00620W_A	Putative glutamine-tRNA ligase; stationary phase enriched protein; Spider biofilm repressed	0	4	E
Plate 08	C01	658	orf19.7441		C3_06520C_A	Ortholog(s) have role in cellular lipid metabolic process, mRNA export from nucleus, protein export from nucleus and nuclear envelope localization	0	2	GD
Plate 08	C02	662	orf19.5436	UTP8	C3_00330W_A	Essential nucleolar protein; involved in tRNA export from the nucleus and ribosomal small subunit biogenesis; physically interacts with TAP-tagged Nop1; Spider biofilm induced	0	0	NE
Plate 08	C03	663	orf19.1460		C2_01530C_A	Putative glutamine-dependent NAD synthetase, involved in NAD salvage pathway	0	3.5	E
Plate 08	C04	666	orf19.239		C3_02490C_A	Putative ATP-dependent helicase; induced by nitric oxide	0	4	E
Plate 08	C05	667	orf19.886	PAN1	C2_03380W_A	Essential protein involved in endocytosis and polarized growth; ortholog of S. cerevisiae Pan1, which is a part of a complex that regulates actin cytoskeleton; Spider biofilm repressed	0	0	NE
Plate 08	C06	668	orf19.4479		C1_04040C_A	Putative U3-containing 90S preribosome subunit; Hap43-induced; repressed in core stress response; Spider biofilm induced	0	4	E
Plate 08	C07	670	orf19.5801	RNR21	C2_03010C_A	Ribonucleoside-diphosphate reductase; regulated by tyrosol and cell density; ciclopirox olamine, fluconazole or flucytosine induced; regulated by Sef1, Sfu1, and Hap43	0	4	E
Plate 08	C08	671	orf19.7511		CR_00230W_A	Ortholog(s) have structural constituent of nuclear pore activity and role in cell division, nuclear pore organization, regulation of mitotic cell cycle	0	0	NE
Plate 08	C09	674	orf19.3234.1	SFT1	CR_01190C_A	Putative Golgi v-SNARE; Plc1-regulated; Spider biofilm induced	0	0	NE
Plate 08	C10	675	orf19.6163	CSE4	C3_00860W_A	Centromeric histone H3 variant; role in structural changes of centromeric nucleosomes during cell cycle; 4 nucleosomes bind 1 centromere, each has 1 Cse4 molecule during most of cell cycle, 2 molecules in anaphase; Spider biofilm repressed	0	4	E
Plate 08	C11	676	orf19.903	GPM1	C2_03270W_A	Phosphoglycerate mutase; surface protein that binds host complement Factor H and FHL-1; antigenic; fluconazole, or amino acid starvation (3-AT) induced, farnesol-repressed; Hap43, flow model biofilm induced; Spider biofilm repressed	0	4	E
Plate 08	C12	677	orf19.6284		CR_07660C_A	Ortholog(s) have GTP binding, signal recognition particle binding activity, role in protein targeting to ER and integral to endoplasmic reticulum membrane localization	0	0	NE
Plate 08	D01	678	orf19.5244	MCD4	C1_12200W_A	Protein of major facilitator superfamily; has phosphodiesterase/nucleotide pyrophosphatase domain; similar to S. cerevisiae Mcd4p, which acts in GPI anchor biosynthesis; possibly an essential gene, disruptants not obtained by UAU1 method	0	0	NE
Plate 08	D02	683	orf19.325		C3_03260W_A	Putative mRNA cleavage and polyadenlylation factor; heterozygous null mutant exhibits hypersensitivity to parnafungin and cordycepin in the C. albicans fitness test	0	4	E
Plate 08	D03	685	orf19.4281	IFH1	C5_02650C_A	Transcription factor; forms a heterodimer with Fhl11 that is tethered to promoters by Tbf1; positively regulates rRNA and ribosomal protein gene transcription; Spider biofilm induced	0	0	NE
Plate 08	D04	688	orf19.5391		C3_00660W_A	Predicted RNA splicing and ER to Golgi transport protein; Hap43-induced gene	0	0	NE
Plate 08	D05	689	orf19.3000	ORC1	C1_03070C_A	Putative origin recognition complex large subunit; essential for viability; similar to S. cerevisiae Orc1p origin recognition complex subunit	0.5	4	E
Plate 08	D06	691	orf19.6010	CDC5	C1_00950C_A	Polo-like kinase; member of conserved Mcm1 regulon; depletion causes defects in spindle elongation and Cdc35-dependent filamentation; virulence-group-correlated expression; likely essential (UAU1 method); Spider biofilm repressed	0	4	E
Plate 08	D07	697	orf19.2675		C4_03150W_A	Ortholog(s) have mRNA binding activity, role in spliceosomal complex assembly and U2 snRNP, U2-type prespliceosome localization	0	4	E
Plate 08	D08	723	orf19.3059	SUA71	C1_03560C_A	Transcription factor TFIIB; required for transcription initiation and start site selection by RNA polymerase II; downregulated during planktonic growth, whereas related SUA72 is induced; induced by Tbf1; rat catheter, Spider biofilm induced	0	4	E
Plate 08	D09	619	orf19.2672	NCP1	C4_03180W_A	NADPH-cytochrome P450 reductase, acts with Erg11p in sterol 14 alpha-demethylation in ergosterol biosynthesis; subject to hypoxic regulation; ketoconazole-induced; caspofungin repressed	0	0	NE
Plate 08	D10	321	orf19.603	IMP4	CR_07950W_A	Putative SSU processome component; Hap43-induced; repressed by prostaglandins; Spider biofilm induced	0	4	E
Plate 08	D11	720	orf19.3474	IPL1	C6_02320C_A	Putative Aurora kinase; Hap43-induced; induced during planktonic growth; possibly an essential gene, disruptants not obtained by UAU1 method	0	4	E
Plate 08	D12	633	orf19.5358		C2_10760C_A	Phosphorylated protein of unknown function	0	3.5	E
Plate 08	E01	545	orf19.7178	PRE5	C7_04020C_A	Alpha6 subunit of the 20S proteasome; regulated by Gcn4; induced in response to amino acid starvation (3-AT); Spider biofilm repressed	0	4	E
Plate 08	E02	428	orf19.4093	PES1	C2_09320C_A	Pescadillo homolog required for yeast cell growth, lateral yeast growth on filamentous cells and virulence in mice; hyphal cells grow normally in mutant; mutation confers hypersensitivity to 5-fluorocytosine, 5-fluorouracil, tubercidin	0	4	E
Plate 08	E03	718	orf19.5413		C3_00500C_A	Ortholog(s) have role in mRNA splicing, via spliceosome and Prp19 complex, spliceosomal complex localization	0	0.75	GD
Plate 08	E04	629	orf19.2437	ARC35	C1_06080C_A	Putative ARP2/3 complex subunit; shows colony morphology-related gene regulation by Ssn6p; mutation confers hypersensitivity to cytochalasin D	0	0	NE
Plate 08	E05	638	orf19.1085		C6_04280W_A	Ortholog(s) have ubiquitin-protein ligase activity and role in ER-associated protein catabolic process, protein ubiquitination involved in ubiquitin-dependent protein catabolic process, vesicle organization	0	0	NE
Plate 08	E06	717	orf19.6783		C3_07170C_A	Putative geranylgeranyltransferase regulatory component	0.25	0	NE
Plate 08	E07	529	orf19.1560	POB3	C2_02380W_A	Protein similar to S. cerevisiae Pob3p, which is involved in chromatin assembly and disassembly; transposon mutation affects filamentous growth	0	0.5	GD
Plate 08	E08	541	orf19.7581		CR_10060W_A	Protein with a predicted role in assembly of U2 snRNP into the spliceosome; Spider biofilm induced	0	3	E
Plate 08	E09	470	orf19.3206	CCT7	C5_01690C_A	Cytosolic chaperonin Cct ring complex; protein is present in exponential and stationary growth phase yeast cultures; sumoylation target	0	4	E
Plate 08	E10	3750	orf19.757		C1_04860W_A	Ortholog of S. cerevisiae : YPR089W, C. glabrata CBS138 : CAGL0K08008g, C. parapsilosis CDC317 : CPAR2_105630 and Candida tenuis NRRL Y-1498 : CANTEDRAFT_129373	0	0	NE
Plate 08	E11	3760	orf19.2468		C1_05830W_A	Ortholog(s) have trans-aconitate 3-methyltransferase activity and cytosol, nucleus localization	0	0	NE
Plate 08	E12	3765	orf19.2751		C4_02510W_A	Predicted membrane transporter; member of the monocarboxylate porter (MCP) family, major facilitator superfamily; Hap43-induced gene; alkaline upregulated by Rim101; possibly an essential gene, disruptants not obtained by UAU1 method	0	0	NE
Plate 08	F01	3768	orf19.1089	PEX11	C6_04310W_A	Putative peroxisomal membrane protein; role in fatty acid oxidation; expression is Tac1-regulated; Hms1p-dependent induction by geldamycin; Spider biofilm induced	0	0	NE
Plate 08	F02	3770	orf19.3142		C4_06670W_A	Ortholog of C. parapsilosis CDC317 : CPAR2_501210, Candida tenuis NRRL Y-1498 : CANTEDRAFT_97195, Debaryomyces hansenii CBS767 : DEHA2E08800g and Candida dubliniensis CD36 : CD36_46140	0	0	NE
Plate 08	F03	3773	orf19.1010	MNT3	CR_05290W_A	Mannosyltransferase; transcription elevated in cyr1, chk1, nik1, and sln1 homozygous null mutants; fungal-specific (no human or murine homolog)	0	0	NE
Plate 08	F04	3778	orf19.2781		C1_07640C_A	Protein with predicted serine/threonine kinase and tyrosine kinase domains; possibly an essential gene, disruptants not obtained by UAU1 method; Spider biofilm induced	0	0	NE
Plate 08	F05	3869	orf19.4459		C1_03870C_A	Predicted heme-binding stress-related protein; Tn mutation affects filamentous growth; induced during chlamydospore formation in C. albicans and C. dubliniensis; Spider biofilm induced	0	0	NE
Plate 08	F06	3894	orf19.2665	MSN5	C4_03280W_A	Predicted karyopherin involved in nuclear import and export of proteins; flow model biofilm induced; Spider biofilm induced	0	0	NE
Plate 08	F07	3991	orf19.59	REI1	C1_05060W_A	Putative cytoplasmic pre-60S factor; Hap43-induced; repressed by prostaglandins	0	0	NE
Plate 08	F08	3998	orf19.1114		C5_03800W_A	Cytochrome c oxidase subunit; membrane-localized protein; rat catheter biofilm induced	0	0	NE
Plate 08	F09	3908	orf19.6736		C3_07550C_A	Protein required for mitochondrial ribosome small subunit biogenesis; role in maturation of SSU-rRNA; Spider biofilm induced	0	0	NE
Plate 08	F10	3971	orf19.2304		C1_11120C_A	Protein similar to S. cerevisiae Gvp36p; transposon mutation affects filamentous growth	0	0	NE
Plate 08	F11	3734	orf19.1537		C2_02200W_A	Putative vacuolar transporter; Hap43-induced; required for normal filamentous growth; mRNA binds She3 and is localized to hyphal tips	0	0	NE
Plate 08	F12	3739	orf19.1339	CPY1	C7_03360W_A	Carboxypeptidase Y; transcript regulated at yeast-hypha transition or macrophage response; induced human neutrophils; regulated by Gcn2 and Gcn4; putative N-glycosylation	0	0	NE
Plate 08	G01	3740	orf19.4466		C1_03920C_A	Ortholog(s) have palmitoyltransferase activity and role in ascospore formation, protein palmitoylation, protein targeting to membrane	0	0	NE
Plate 08	G02	3759	orf19.6738	VAN1	C3_07500W_A	Member of Mnn9 family of mannosyltransferases; ortholog of S. cerevisiae Van1p; fungal-specific (no human or murine homolog)	1	0.5	GD
Plate 08	G03	3761	orf19.2474	PRC3	C1_05770C_A	Putative carboxypeptidase Y precursor; transcript regulated by Nrg1 and Mig1; regulated by Gcn2 and Gcn4	0	0	NE
Plate 08	G04	3762	orf19.2538	PTC2	CR_01520W_A	Protein phosphatase of the Type 2C-related family (serine/threonine-specific) with a potential role in DNA damage checkpoint control; localizes to both cytoplasm and mitochondria; mutant shows virulence defect	0	0	NE
Plate 08	G05	3763	orf19.2709	ZUO1	C4_02870C_A	Ortholog of S. cerevisiae Zuo1; a cytosolic ribosome-associated chaperone; likely to be essential for growth, based on an insertional mutagenesis strategy; Spider biofilm repressed	0	2	GD
Plate 08	G06	3766	orf19.6538	VMA11	C7_01820C_A	Predicted ortholog of S. cerevisiae Tfp3/Vma11; c' subunit of the V0 subcomplex of the vacuolar ATPase; required for hemoglobin-iron utilization; Spider biofilm repressed	0	0	NE
Plate 08	G07	3767	orf19.1084	CDC39	C6_04270W_A	Protein similar to S. cerevisiae Cdc39p, which is part of the CCR4-NOT transcription regulatory complex; transposon mutation affects filamentous growth	0	4	E
Plate 08	G08	3769	orf19.1161	PLD1	C1_11590W_A	Phospholipase D1; required for phosphatidic acid and for most diacylglycerol production; required for wild-type mouse virulence, but not rat oral virulence; mutant defect in hyphal growth on solid substrates; similar to S. cerevisiae Spo14p	0	0	NE
Plate 08	G09	3775	orf19.799	STE4	C2_04210W_A	Beta subunit of heterotrimeric G protein of mating signal transduction pathway; required for mating; transcript is specific to cells homozygous at MTL; induced by alpha pheromone; ortholog of S. cerevisiae Ste4	0	0	NE
Plate 08	G10	3749	orf19.1734		CR_04720C_A	Putative ATPase and nucleosome spacing factor; heterozygous null mutant displays sensitivity to virgineone	0	0	NE
Plate 08	G11	3781	orf19.671	PSP1	C1_11310C_A	Protein repressed during the mating process	0.5	0	NE
Plate 08	G12	3797	orf19.4778	LYS142	C1_09200W_A	Zn(II)2Cys6 transcription factor; has similarity to S. cerevisiae Lys14, involved in the regulation of lysine biosynthesis genes; fungal-specific	0	0	NE
Plate 08	H01	3809	orf19.4563		C4_02260C_A	Protein of unknown function; repressed by prostaglandins; Hap43-induced, Spider biofilm induced	0	0	NE
Plate 08	H02	3883	orf19.2094	PDR6	C2_00370W_A	Putative pleiotropic drug resistance regulatory protein 6; transcript regulated by Nrg1; induced by alpha pheromone in SpiderM medium	0	0	NE
Plate 08	H03	3886	orf19.7460		CR_00670C_A	Putative 2'-O-methyltransferase with a predicted role in tRNA modification; transcription is activated in the presence of elevated CO2	0	0	NE
Plate 08	H04	3921	orf19.2887		C4_06470W_A	Ortholog in S. cerevisiae is localizedto the bud, mating projection tip, and associates with ribosomes; Spider biofilm induced	0	0	NE
Plate 08	H05	3930	orf19.758		C1_04840C_A	Ortholog(s) have signal sequence binding activity, role in vacuolar transport and late endosome localization	0	0	NE
Plate 08	H06	3966	orf19.4279	MNN1	C5_02630C_A	Putative alpha-1,3-mannosyltransferase; of the mannosyltransferase complex; negatively regulated by Rim101; transcript elevated in chk1 and nik1 mutants, but not in sln1 mutant; Spider and flow model biofilm induced	0	0	NE
Plate 08	H07	4006	orf19.6082		C1_00210C_A	Ortholog(s) have unfolded protein binding activity, role in protein folding, protein localization to cell surface and integral to endoplasmic reticulum membrane, mitochondrial outer membrane localization	0	0	NE
Plate 08	H08	4008	orf19.7096		C7_00260C_A	Ortholog(s) have fungal-type vacuole membrane, mitochondrion localization	0	0	NE
Plate 08	H09	4012	orf19.425		C1_05400C_A	Has domain(s) with predicted translation release factor activity and role in translational termination	0	0	NE
Plate 08	H10	4023	orf19.1016		NA	Ortholog(s) have role in proteasome regulatory particle assembly and cytosol, nucleus localization	#N/A	#N/A	#N/A
Plate 08	H11	719	orf19.3476		C6_02340W_A	Predicted protein serine/threonine kinase; Spider biofilm induced	0	1	GD
Plate 08	H12	722	orf19.2040		C2_00840W_A	Ortholog(s) have oxidoreductase activity, acting on NADH or NADPH activity, role in iron-sulfur cluster assembly, oxidation-reduction process and mitochondrion localization	0	0	NE
Plate 09	A01	423	orf19.1687		C3_01560W_A	Ortholog of S. cerevisiae Prp43, an RNA helicase in the DEAH-box family that functions in both RNA polymerase I and polymerase II transcript metabolism; Hap43-induced gene	0	3.5	E
Plate 09	A02	727	orf19.1254	SEC23	C4_05690W_A	Putative GTPase-activating protein; regulated upon yeast-hypha switch; Spider biofilm repressed	0	0	NE
Plate 09	A03	724	orf19.2230		C2_06790W_A	Putative pre-mRNA-splicing factor; decreased transcription is observed upon benomyl treatment	0	0	NE
Plate 09	A04	640	orf19.4293		C5_02730C_A	Ortholog(s) have role in iron-sulfur cluster assembly, ribosomal large subunit export from nucleus, tRNA wobble uridine modification and cytosol, nucleus localization	0	0	NE
Plate 09	A05	624	orf19.3251	ARC19	CR_01040C_A	Putative ARP2/3 complex subunit; Hap43p-induced gene; mutation confers hypersensitivity to cytochalasin D	0	0	NE
Plate 09	A06	626	orf19.1883	YCS4	C2_07470W_A	Putative condensin complex subunit; cell-cycle regulated periodic mRNA expression	0	4	E
Plate 09	A07	497	orf19.1457		C2_01490C_A	Putative RNA polymerase transcription factor TFIIH core component; possibly an essential gene, disruptants not obtained by UAU1 method	0	4	E
Plate 09	A08	634	orf19.6340		C1_12820C_A	Ortholog(s) have DNA-directed RNA polymerase activity, RNA-directed RNA polymerase activity	0	4	E
Plate 09	A09	632	orf19.5513		C6_02440C_A	Protein required for pre-mRNA splicing; Spider biofilm induced	0	4	E
Plate 09	A10	725	orf19.3524	CRK1	C2_04930C_A	Protein kinase of the Cdc2 subfamily involved in hyphal development, virulence; promotes hyphal development independently of Cph1 and Efg1; functionally complements pheromone hypersensitivity of S. cerevisiae sgv1 mutant; Hap43p-repressed	0	0	NE
Plate 09	A11	690	orf19.5174	TAF19	C7_02870C_A	Putative TFIID subunit; mutation confers hypersensitivity to amphotericin B; rat catheter biofilm induced	0	0	NE
Plate 09	A12	3733	orf19.1444		C2_01390W_A	Ortholog(s) have phosphatidylinositol-4,5-bisphosphate binding activity, role in actin cortical patch assembly, actin filament organization, endocytosis and actin cortical patch, mating projection tip localization	0	0	NE
Plate 09	B01	3738	orf19.3545		C2_05140W_A	Ortholog(s) have protein serine/threonine kinase activity, role in meiotic anaphase II, protein phosphorylation, septation initiation signaling cascade and nucleus, spindle pole body localization	0	0	NE
Plate 09	B02	3805	orf19.4961	STP2	C1_13350W_A	Amino-acid-regulated transcription factor; activates transcription of amino acid permease genes; activated by amino-acid-induced proteolytic processing (Ssy1, Csh3 dependent); required for alkalinization of medium; Spider biofilm induced	0	0	NE
Plate 09	B03	3807	orf19.4967	COX19	C1_13410W_A	Putative cytochrome c oxidase assembly protein; Plc1-regulated; rat catheter biofilm induced	0	0	NE
Plate 09	B04	3826	orf19.5214	VPS33	C2_05940C_A	Ortholog(s) have ATP binding, phosphatidylinositol binding activity	0	0	NE
Plate 09	B05	3897	orf19.2106		C2_00270C_A	Putative protein of unknown function; Hap43p-repressed gene	0	0	NE
Plate 09	B06	3952	orf19.3799		C4_04800W_A	Ortholog(s) have role in endoplasmic reticulum tubular network maintenance, nuclear pore complex assembly and Golgi apparatus, cortical endoplasmic reticulum, integral to endoplasmic reticulum membrane, mitochondrion localization	0	0	NE
Plate 09	B07	3963	orf19.3176	RIM21	C5_01950C_A	Plasma membrane pH-sensor involved in the Rim101 pH response pathway; required for processing and activation of Rim101 and for alkaline pH-induced hyphal growth; Spider biofilm induced	0	0	NE
Plate 09	B08	3987	orf19.307		C3_03100C_A	Ortholog(s) have transcription coactivator activity, role in histone acetylation, transcription from RNA polymerase II promoter and Ada2/Gcn5/Ada3 transcription activator complex, SAGA complex, SLIK (SAGA-like) complex localization	0	0	NE
Plate 09	B09	4003	orf19.351		C3_03530W_A	Ortholog of S. cerevisiae : YPR153W, C. glabrata CBS138 : CAGL0L08382g, C. parapsilosis CDC317 : CPAR2_404520 and Candida tenuis NRRL Y-1498 : CANTEDRAFT_115795	0	0	NE
Plate 09	B10	3779	orf19.2782		C1_07630W_A	Ortholog(s) have disulfide oxidoreductase activity, role in cellular response to oxidative stress, response to osmotic stress and mitochondrial matrix localization	0	1	GD
Plate 09	B11	4182	orf19.3557	GPI19	C2_05280C_A	Subunit of GPI-GlcNAc transferase; role in synthesis of N-acetylglucosaminyl phosphatidylinositol (GlcNAc-PI), the first intermediate in GPI anchor synthesis; complements S. cerevisiae gpi19 mutant; flow model biofilm induced	0	0	NE
Plate 09	B12	4239	orf19.3785		C4_04930C_A	DnaJ chaperone domain protein; role in pre-mRNA splicing; Spider biofilm induced	0	0	NE
Plate 09	C01	4265	orf19.2266		C2_07110C_A	Ortholog(s) have ATPase activity, DNA binding, nucleosome binding activity, role in chromatin remodeling and ISW1 complex localization	0	0	NE
Plate 09	C02	4269	orf19.1634		C3_02120W_A	Has domain(s) with predicted fatty-acyl-CoA binding activity	0	0	NE
Plate 09	C03	4277	orf19.4195		C6_00630W_A	Has domain(s) with predicted nucleic acid binding, zinc ion binding activity and intracellular localization	0	0	NE
Plate 09	C04	4278	orf19.3697		C7_02670W_A	Ortholog(s) have role in re-entry into mitotic cell cycle after pheromone arrest	0	0	NE
Plate 09	C05	4283	orf19.7568		CR_09940W_A	Ortholog of S. cerevisiae : SPS4, C. glabrata CBS138 : CAGL0I09834g, C. parapsilosis CDC317 : CPAR2_200810, Candida tenuis NRRL Y-1498 : CANTEDRAFT_112327 and Debaryomyces hansenii CBS767 : DEHA2G06336g	0	0	NE
Plate 09	C06	4291	orf19.719		CR_06470W_A	Ortholog(s) have ubiquitin-protein ligase activity and role in ER-associated protein catabolic process, fungal-type cell wall organization, negative regulation of transcription by transcription factor catabolism	0	0	NE
Plate 09	C07	4305	orf19.7386		C3_06050C_A	Ortholog(s) have ribosome binding activity	0	0	NE
Plate 09	C08	4310	orf19.720	GST3	CR_06460W_A	Glutathione S-transferase; expression regulated upon white-opaque switch; induced by human neutrophils; peroxide-induced; induced by alpha pheromone in SpiderM medium; Spider biofilm induced	0	0	NE
Plate 09	C09	4320	orf19.7598		CR_10230W_A	Ortholog(s) have histone acetyltransferase activity, role in histone acetylation and Ada2/Gcn5/Ada3 transcription activator complex localization	0	0	NE
Plate 09	C10	4321	orf19.3589	SPO11	C2_08820C_A	DNA endonuclease; required for genetic recombination between homologous chromosomes during the parasexual cycle; produced in mitotically dividing cells; similar to S. cerevisiae Spo11 which functions in recombination during meiosis	0	0	NE
Plate 09	C11	4327	orf19.2439		C1_06060C_A	Fatty acid biosynthetic protein; shows colony morphology-related gene regulation by Ssn6p; protein newly produced during adaptation to the serum	0	0	NE
Plate 09	C12	3795	orf19.4766	ARG81	C1_09090C_A	Zn(II)2Cys6 transcription factor; required for utilization of ornithine as a nitrogen source and for wild-type resistance to caffeine; required for yeast cell adherence to silicone substrate	0	0	NE
Plate 09	D01	4184	orf19.6756		C3_07350W_A	Ortholog(s) have Rab GTPase binding activity and Golgi apparatus, endoplasmic reticulum localization	0	0	NE
Plate 09	D02	4284	orf19.5078		C1_08060W_A	Protein of unknown function; Hap43-repressed gene	0	0	NE
Plate 09	D03	4331	orf19.6508		C7_02090C_A	Ortholog(s) have protein transporter activity, role in Golgi to plasma membrane transport, intracellular protein transport and vesicle coat localization	0	0	NE
Plate 09	D04	1041	orf19.5772		C6_03950C_A	Ortholog(s) have role in histone exchange and Swr1 complex localization	0	0	NE
Plate 09	D05	1167	orf19.4725	SWI6	C1_08670W_A	Putative component of the MBF and SBF transcription complexes involved in G1/S cell-cycle progression; periodic mRNA expression, peak at cell-cycle G1/S phase	0	0	NE
Plate 09	D06	1174	orf19.4242	CST20	C5_02340C_A	Protein kinase of Ste20p/p65PAK family, required for wild-type mating efficiency and virulence in a mouse model; Cst20p-Hst7p-Cek1p-Cph1p MAPK pathway regulates some hyphal growth; involved in Cdc42p growth regulation	0	0	NE
Plate 09	D07	1183	orf19.1490	MSB2	C2_01780W_A	Mucin family adhesin-like protein; cell wall damage sensor; required for Cek1 phosphorylation by cell wall stress; Rim101-repressed; activation releases extracellular domain into medium; Spider biofilm induced	0	0	NE
Plate 09	D08	1185	orf19.6801	RPD31	C3_07000W_A	Putative histone deacetylase; involved in regulation of white-opaque switch; Spider biofilm repressed	0	0	NE
Plate 09	D09	1186	orf19.1792		C4_05340W_A	Ortholog(s) have ubiquitin-protein ligase activity	0	4	E
Plate 09	D10	1187	orf19.171	DBP2	CR_02530W_A	Putative DEAD-box family ATP-dependent RNA helicase; flucytosine induced; repressed in core stress response	0	4	E
Plate 09	D11	1191	orf19.5447	HGT19	C3_00220W_A	Putative MFS glucose/myo-inositol transporter; 20 member family; 12 transmembrane segments, extended N terminus; expressed in rich medium; Hap43, phagocytosis, rat catheter, Spider and flow model biofilm induced	0	0	NE
Plate 09	D12	1199	orf19.3642	SUN41	C6_00820W_A	Cell wall glycosidase; role in biofilm formation and cell separation; possibly secreted; hypoxia, hyphal induced; caspofungin repressed; Efg1, Cph1 regulated; O-glycosylated, possible Kex2 substrate; 5'-UTR intron; Spider biofilm induced	0	1	GD
Plate 09	E01	1534	orf19.814	SSY1	C2_04060C_A	Amino acid sensor; required for wild-type hyphal growth on solid serum or Lees media, not under all conditions; 12 predicted membrane spanning regions; Hap43-repressed; Spider biofilm induced	0	0	NE
Plate 09	E02	1548	orf19.7433		C3_06440W_A	Ortholog(s) have nucleocytoplasmic transporter activity, structural constituent of nuclear pore activity	0	0	NE
Plate 09	E03	4198	orf19.5664	HOF1	C4_00370W_A	Ortholog of S. cerevisiae Hof1; a protein localized to the bud neck and required for cytokinesis in S. cerevisiae; periodic mRNA expression, peak at cell-cycle G2/M phase; mutant is viable	0	0	NE
Plate 09	E04	4255	orf19.4013		C5_05200C_A	Putative protein of unknown function; Hap43p-repressed gene; S. cerevisiae ortholog YHR045W localizes to the endoplasmic reticulum	0	0	NE
Plate 09	E05	4332	orf19.5680		C5_00170W_A	Protein with predicted hydrolase domains; similar to a universal stress protein family protein; possibly essential, disruptants not obtained by UAU1 method; Spider biofilm repressed	0	0	NE
Plate 09	E06	378	orf19.5885		C3_04380C_A	Putative U3 snoRNP protein; flucytosine induced	0	4	E
Plate 09	E07	316	orf19.4373		CR_03740C_A	Protein similar to S. cerevisiae Fmn1p, which is riboflavin kinase; predicted Kex2p substrate; Hap43p-repressed gene	0	0	NE
Plate 09	E08	544	orf19.5085		C1_08110W_A	Ortholog(s) have nuclear localization sequence binding, protein transporter activity and role in mRNA export from nucleus, protein import into nucleus, regulation of mitosis, regulation of protein desumoylation	0	0	NE
Plate 09	E09	387	orf19.2736	HFL2	C4_02630C_A	HAP5-like; ortholog of S. cerevisiae Bur6, a heterodimeric NC2 transcription regulator complex subunit; flucytosine induced	0	0	NE
Plate 09	E10	639	orf19.4374	PRP42	CR_03750C_A	Putative component of the U1 snRNP, involved in splicing; ortholog of S. cerevisiae PRP42	0	4	E
Plate 09	E11	416	orf19.5378	SCL1	C3_00770C_A	Proteasome subunit YC7alpha; protein present in exponential and stationary growth phase yeast cultures; Spider biofilm repressed	0	4	E
Plate 09	E12	420	orf19.2275		C2_07190C_A	Putative mitochondrial ribosomal protein; predicted role in aerobic respiration; Spider biofilm repressed	0	0	NE
Plate 09	F01	137	orf19.5963		C3_04940W_A	Putative prenyltransferase; essential gene in S. cerevisiae; Spider biofilm induced	0	0	NE
Plate 09	F02	273	orf19.3856	CDC28	CR_06050W_A	Cyclin-dependent protein kinase; interacts with regulatory subunit Cyb1; determination of cell morphology during the cell cycle; phosphorylated mostly by Swe1 and phosphorylation is regulated by Hsl1; 5'-UTR intron; Spider biofilm repressed	0	3	E
Plate 09	F03	415	orf19.5383	PMA1	C3_00720W_A	Plasma membrane H(+)-ATPase; highly expressed, comprises 20-40% of total plasma membrane protein; levels increase at stationary phase transition; fluconazole induced; caspofungin repressed; upregulated in RHE model; Spider biofilm repressed	0	4	E
Plate 09	F04	390	orf19.2571	SEC4	CR_01750C_A	Small GTPase of Rab family; role in post-Golgi secretion; possible C-terminal palmitoylation; downregulated on adherence to polystyrene; localizes to the Spitzenkorper during hyphal growth; functional homolog of S. cerevisiae Sec4p	0	4	E
Plate 09	F05	269	orf19.4620	TIM12	C4_01740W_A	Predicted component of the TIM22 complex, involved in protein import into mitochondrial inner membrane; flow model biofilm induced	0	3	E
Plate 09	F06	276	orf19.202	CDC47	C2_09020W_A	Phosphorylated protein described as having role in control of cell division; RNA abundance regulated by tyrosol and cell density; merged with orf19.201 in Assembly 20; unmerged from orf19.201 in a revision of Assembly 21	0	1	GD
Plate 09	F07	739	orf19.3211	RCF3	C5_04000W_A	Putative heteropentameric replication factor C subunit; transcription is induced upon filamentous growth	0	0	NE
Plate 09	F08	736	orf19.5833		C2_02730W_A	Ortholog(s) have polyubiquitin binding activity	0	2	GD
Plate 09	F09	733	orf19.2885	PRI2	C4_06490C_A	Putative DNA primase; gene adjacent to and divergently transcribed with CDC68; Hap43-induced; Spider biofilm repressed	0	4	E
Plate 09	F10	732	orf19.4732	SEC24	C1_08740C_A	Protein with a possible role in ER to Golgi transport; induced upon yeast-hyphal switch; sumoylation target; Spider biofilm repressed	0	4	E
Plate 09	F11	738	orf19.1771		C2_10100W_A	Predicted spliceosome-associated protein; role in pre-mRNA splicing; Spider biofilm induced	0	0	NE
Plate 09	F12	737	orf19.488	MEX67	CR_04050C_A	Nuclear export protein; has NTF2-like domain; interacts with Mtr2p via the NTF2-like domain	0	4	E
Plate 09	G01	635	orf19.7293	MPS1	CR_08960C_A	Monopolar spindle protein, a putative kinase; essential for growth; periodic mRNA expression, peak at cell-cycle S/G2 phase	0	4	E
Plate 09	G02	274	orf19.3888	PGI1	CR_06340C_A	Glucose-6-phosphate isomerase; enzyme of glycolysis; antigenic in human; Efg1-regulated; induced upon adherence to polystyrene; repressed by phagocytosis, expoure to human neutrophils; flow model biofilm induced; Spider biofilm repressed	0	4	E
Plate 09	G03	527	orf19.6135.1	SMX4	CR_07330W_A	Component of heteroheptameric complexes (Lsm1p, Lsm8p) involved in RNA processing and decay; flucytosine induced	0	0	NE
Plate 09	G04	431	orf19.3300	ZPR1	C1_01110C_A	Protein with putative zinc finger; regulated by Gcn4p; repressed in response to amino acid starvation (3-aminotriazole treatment); upregulation correlates with clinical development of fluconazole resistance	0	0	NE
Plate 09	G05	661	orf19.6776	GCD2	C3_07250W_A	Putative translation initiation factor; genes encoding ribosomal subunits, translation factors, and tRNA synthetases are downregulated upon phagocytosis by murine macrophage	0	4	E
Plate 09	G06	672	orf19.900	NSP1	C2_03280W_A	Essential component of the nuclear pore complex; sumoylation target; stationary phase enriched protein	0	4	E
Plate 09	G07	679	orf19.969		C5_00260W_A	Ortholog(s) have ribose phosphate diphosphokinase activity, role in 5-phosphoribose 1-diphosphate biosynthetic process, fungal-type cell wall organization and cytosol, nucleus localization	0	3	E
Plate 09	G08	682	orf19.964	SMC4	C5_00300C_A	Ortholog(s) have chromatin binding activity, role in mitotic chromosome condensation, tRNA gene clustering and SMC loading complex, condensed chromosome inner kinetochore, cytosol, nuclear condensin complex, nucleolus localization	0	4	E
Plate 09	G09	680	orf19.796	HYM1	C2_04240C_A	Protein of RAM cell wall integrity signaling network; involved in regulation of Ace2 activity and cellular morphogenesis; role in cell separation, azole sensitivity; required for hyphal growth	0	0	NE
Plate 09	G10	694	orf19.6909		C7_01290W_A	Ortholog(s) have TFIIH-class transcription factor binding, TFIIH-class transcription factor recruiting transcription factor activity	#N/A	#N/A	#N/A
Plate 09	G11	698	orf19.3962	HAS1	C5_04750C_A	Functional homolog of S. cerevisiae Has1p, which is a nucleolar protein of the DEAD-box ATP-dependent RNA helicase family that is involved in biogenesis of the ribosome, particularly the small (40S) subunit; caspofungin-downregulated	0	4	E
Plate 09	G12	334	orf19.337		C3_03400C_A	Ortholog(s) have SNAP receptor activity and role in Golgi to vacuole transport, intra-Golgi vesicle-mediated transport, vacuole fusion, non-autophagic, vesicle fusion	0	0	NE
Plate 09	H01	705	orf19.2307		C1_11090C_A	Ortholog(s) have role in mRNA cleavage, mRNA polyadenylation, mitotic sister chromatid segregation, regulation of G1/S transition of mitotic cell cycle and cytosol, mRNA cleavage and polyadenylation specificity factor complex localization	0	3.5	E
Plate 09	H02	458	orf19.1402	CCT2	C2_09520C_A	Chaperonin of the cytosolic TCP1 ring complex; protein present in exponential and stationary-phase yeast cells, but higher amounts in stationary phase; GlcNAc-induced protein	0	4	E
Plate 09	H03	713	orf19.6861		C4_05220C_A	Ortholog(s) have ubiquitin-protein ligase activity and role in anaphase-promoting complex-dependent proteasomal ubiquitin-dependent protein catabolic process, chromatin assembly, protein ubiquitination	0	0	NE
Plate 09	H04	710	orf19.6598	WAL1	CR_09650W_A	Protein required for hyphal growth and for wild-type cell morphology, polarized budding, endocytosis, vacuole morphology; similar to Wiskott-Aldrich syndrome protein; localizes to cortical actin patches and hyphal tips	0	0	NE
Plate 09	H05	594	orf19.5846		CR_05560W_A	Putative TFIIH and nucleotide excision repair factor 3 complex subunit; possibly an essential gene, disruptants not obtained by UAU1 method	0	4	E
Plate 09	H06	644	orf19.4033	PRP22	C5_05370C_A	Putative RNA-dependent ATPase; induced upon adherence to polystyrene; induced by Mnl1p under weak acid stress	0	1.75	GD
Plate 09	H07	597	orf19.3478	NIP7	C6_02360W_A	Putative nucleolar protein with role in ribosomal assembly; hyphal-induced; Hap43-induced; Spider biofilm induced	0	4	E
Plate 09	H08	706	orf19.5732	NOG2	C6_03640W_A	Putative nucleolar GTPase; repressed by prostaglandins; Hap43-induced, rat catheter and Spider biofilm induced	0	4	E
Plate 09	H09	598	orf19.6539		C7_01810W_A	Putative trancription modulator; RuvB-like protein family member; heterozygous null mutant displays sensitivity to virgineone	0	4	E
Plate 09	H10	592	orf19.3031	SEC62	C1_03340C_A	Putative endoplasmic reticulum (ER) protein-translocation complex subunit	0	0	NE
Plate 09	H11	700	orf19.2528		CR_01420W_A	Putative RNA polymerase III transcription factor (TFIIIB) subunit; flucytosine repressed	#N/A	#N/A	#N/A
Plate 09	H12	650	orf19.3623	SMC2	C2_08560W_A	Protein similar to S. cerevisiae Smc2p, which is a component of the condensin complex involved in mitotic chromosome condensation; induced under hydroxyurea treatment	0	3.5	E
Plate 10	A01	601	orf19.4542		C1_01820C_A	Ortholog(s) have cyclin-dependent protein kinase inhibitor activity	0	2.25	GD
Plate 10	A02	616	orf19.2643	RPO26	C5_03360W_A	Putative RNA polymerase subunit; heterozygous null mutant exhibits resistance to parnafungin in the C. albicans fitness test	0	4	E
Plate 10	A03	646	orf19.7256		C1_14410W_A	Ortholog of S. cerevisisae/S. pombe Lsm5; Lsm (Like Sm) protein involved in mRNA decay; Predicted ORF from Assembly 19; removed from Assembly 20; restored based on comparative genome analysis; flucytosine induced	0	0	NE
Plate 10	A04	714	orf19.6931		C3_03840C_A	Putative cleavage factor I subunit; heterozygous null mutant exhibits hypersensitivity to parnafungin and cordycepin in the C. albicans fitness test	0	4	E
Plate 10	A05	702	orf19.6234		C1_06760C_A	Putative U2 snRNP component; mutation confers hypersensitivity to 5-fluorocytosine (5-FC), 5-fluorouracil (5-FU), and tubercidin (7-deazaadenosine); Hap43-induced, Spider biofilm induced	0	0	NE
Plate 10	A06	45	orf19.2843	RHO1	CR_02860W_A	Small GTPase of Rho family; regulates beta-1,3-glucan synthesis activity and binds Gsc1p; essential; expected to be geranylgeranylated by geranylgeranyltransferase type I; plasma membrane-localized	0	4	E
Plate 10	A07	24	orf19.4120	LAS1	C2_06000W_A	Putative bud formation and morphogenesis protein; mutation confers hypersensitivity to 5-fluorocytosine (5-FC), 5-fluorouracil (5-FU); macrophage-induced; Spider biofilm induced	0	4	E
Plate 10	A08	46	orf19.922	ERG11	C5_00660C_A	Lanosterol 14-alpha-demethylase; cytochrome P450 family; role in ergosterol biosynthesis; target of azole antifungals; may contribute to drug resistance; azole or flow model biofilm induced; drug treated biofilm induced; hypoxia regulated	0	4	E
Plate 10	A09	54	orf19.2609	CET1	CR_02090C_A	mRNA 5'-triphosphatase; large subunit of mRNA capping enzyme; positively regulates Ceg1 activity; functional homolog of S. cerevisiae Cet1; Cet1 and Cgt1 form a 2:1 complex; flow model biofilm induced	0	0	NE
Plate 10	A10	55	orf19.2560	CDC60	CR_01690C_A	Cytosolic leucyl tRNA synthetase; conserved amino acid and ATP binding class I signature, tRNA binding, proofreading motifs; likely essential for growth; interacts with benzoxaborole antifungals; present in exponential and stationary phase	0	4	E
Plate 10	A11	63	orf19.5692		C5_00060C_A	Ortholog(s) have ubiquitin-protein ligase activity, role in anaphase-promoting complex-dependent proteasomal ubiquitin-dependent protein catabolic process, protein ubiquitination and anaphase-promoting complex localization	0	2.25	GD
Plate 10	A12	70	orf19.708		CR_06740W_A	Ortholog(s) have structural constituent of cytoskeleton activity	0	4	E
Plate 10	B01	68	orf19.7141	UFE1	C7_04270C_A	Protein interacting with Sec20p, possibly involved in retrograde transport between the Golgi and the endoplasmic reticulum; functional homolog of S. cerevisiae Ufe1p, which is an ER t-SNARE that mediates the retrograde traffic	0	4	E
Plate 10	B02	65	orf19.5166	DBF4	C7_02950C_A	Putative Cdc7p-Dbf4p kinase complex regulatory subunit; Hap43p-induced gene; macrophage/pseudohyphal-repressed; cell-cycle regulated periodic mRNA expression; S. cerevisiae ortholog is not cell-cycle regulated	0	4	E
Plate 10	B03	66	orf19.7492	SWC4	CR_00400C_A	Subunit of the NuA4 histone acetyltransferase complex	0	1	GD
Plate 10	B04	15	orf19.5884		C3_04370C_A	Putative nucleolar preribosomal-associated protein; decreased transcription is observed upon benomyl treatment or in an azole-resistant strain that overexpresses MDR1; Spider biofilm induced	0	4	E
Plate 10	B05	2	orf19.1434		C2_08380C_A	Ortholog(s) have protein kinase activator activity	0	0	NE
Plate 10	B06	36	orf19.4443	YPD1	C1_07240W_A	Phosphohistidine intermediate protein in a phosphorelay signal transduction pathway; residue His69 is the phosphoacceptor histidine; predicted to be soluble and cytosolic; functional homolog of S. cerevisiae Ypd1p	0	0	NE
Plate 10	B07	4	orf19.2831	RPC31	CR_02720C_A	Putative RNA polymerase III subunit C31; repressed by nitric oxide; induced during infection of murine kidney, compared to growth in vitro; has murine homolog	0	4	E
Plate 10	B08	14	orf19.7620		CR_10430C_A	Ortholog(s) have role in mRNA splicing, via spliceosome and spliceosomal complex localization	0	0	NE
Plate 10	B09	16	orf19.1569	UTP22	C2_02450C_A	Putative U3 snoRNP protein; Ssr1-induced; repressed by prostaglandins; heterozygous null mutant is resistant to parnafungin	0	0	NE
Plate 10	B10	26	orf19.3724		CR_02420W_A	Ortholog(s) have role in endonucleolytic cleavage in 5'-ETS of tricistronic rRNA transcript (SSU-rRNA, 5.8S rRNA and LSU-rRNA), more	0	1	GD
Plate 10	B11	39	orf19.801	TBF1	C2_04200W_A	Essential transcription factor; induces ribosomal protein genes and the rDNA locus; acts with Cbf1 at subset of promoters; recruits Fhl1 and Ifh1 to promoters; role is analogous to that of S. cerevisiae Rap1; Spider biofilm induced	0	3.5	E
Plate 10	B12	40	orf19.677	CHO1	C1_11240C_A	Putative phosphatidylserine synthase; ortholog of S. transposon mutation affects filamentous growth; regulated by Nrg1, Tup1	0	0	NE
Plate 10	C01	41	orf19.6489	FMP45	C7_02240W_A	Predicted membrane protein induced during mating; mutation confers hypersensitivity to toxic ergosterol analog, to amphotericin B; alkaline repressed; repressed by alpha pheromone in SpiderM medium; rat catheter, Spider biofilm induced	#N/A	#N/A	#N/A
Plate 10	C02	42	orf19.1945	AUR1	C5_01240W_A	Inositolphosphorylceramide (IPC) synthase; catalyzes the key step in sphingolipid biosynthesis; antifungal drug target; flow model biofilm induced; Spider biofilm induced	0	3.5	E
Plate 10	C03	43	orf19.29		C2_06530W_A	Ortholog of S. cerevisiae Tah11, a DNA replication licensing factor required for pre-replication complex assembly; rat catheter, flow model and Spider biofilm induced	0	0	NE
Plate 10	C04	44	orf19.4566		C4_02240C_A	Protein similar to S. cerevisiae Rot1p, which has roles in cytoskeletal dynamics and cell wall biosynthesis; predicted Kex2p substrate	0	0	NE
Plate 10	C05	13	orf19.5363		C2_10790C_A	Component of UDP-GlcNAc transferase; required for the 2nd step of dolichyl-linked oligosaccharide synthesis; Spider biofilm induced	0	4	E
Plate 10	C06	1	orf19.4161		C4_00800W_A	Ortholog(s) have role in DNA repair and Smc5-Smc6 complex, nucleus localization	0	0.5	GD
Plate 10	C07	58	orf19.2187	ALG7	C2_07940C_A	Protein involved in cell wall mannan biosynthesis; mutation confers hypersensitivity to tunicamycin; transcript elevated in chk1, nik1, and sln1 homozygous null mutants; possibly essential gene, disruptants not obtained by UAU1 method	0	4	E
Plate 10	C08	57	orf19.7308	TUB1	CR_09120C_A	Alpha-tubulin; gene has intron; complements cold-sensitivity of S. cerevisiae tub1 mutant; C. albicans has single alpha-tubulin gene, whereas S. cerevisiae has two (TUB1, TUB3); farnesol-upregulated in biofilm; sumoylation target	0	4	E
Plate 10	C09	33	orf19.7599	UTP5	CR_10240W_A	Putative U3 snoRNA-associated protein; Hap43p-induced gene; mutation confers resistance to 5-fluorocytosine (5-FC), 5-fluorouracil (5-FU), and tubercidin (7-deazaadenosine); physically interacts with TAP-tagged Nop1p	0	3.5	E
Plate 10	C10	30	orf19.4849		C1_09840C_A	Protein required for localizing proteasomes to the nucleus; involved in ubiquitin-mediated protein degradation; possibly an essential gene, disruptants not obtained by UAU1 method; Spider biofilm induced	0	0	NE
Plate 10	C11	21	orf19.6341		C1_12810W_A	Ortholog(s) have 5-amino-6-(5-phosphoribosylamino)uracil reductase activity, role in riboflavin biosynthetic process and cytosol, nucleus localization	0	0	NE
Plate 10	C12	20	orf19.4601		C4_01910W_A	Putative RNA polymerase III transcription initiation factor complex (TFIIIC) subunit; possibly an essential gene, disruptants not obtained by UAU1 method	0	0	NE
Plate 10	D01	35	orf19.1776		C2_10060C_A	Ortholog(s) have role in coenzyme A biosynthetic process and cytosol, nucleus localization	0	0	NE
Plate 10	D02	10	orf19.6346		C1_12760W_A	Putative nuclear export protein; Hap43p-induced gene; decreased transcription is observed in an azole-resistant strain that overexpresses MDR1	0	0	NE
Plate 10	D03	7	orf19.579	FOL1	C5_00770C_A	Putative dihydroneopterin aldolase (dihydro-6-hydroxymethylpterin pyrophosphokinase); fungal-specific (no human or murine homolog)	#N/A	#N/A	#N/A
Plate 10	D04	27	orf19.7019	YML6	C7_00950W_A	Putative mitochondrial ribosomal protein; induced upon adherence to polystyrene	0	2.5	GD
Plate 10	D05	37	orf19.6880		C2_05680W_A	Ortholog(s) have role in CVT pathway, macroautophagy, peroxisome degradation, retrograde transport, vesicle recycling within Golgi and Golgi transport complex, cell division site, cell tip, nucleus localization	#N/A	#N/A	#N/A
Plate 10	D06	29	orf19.5526	SEC20	C6_02570C_A	Essential protein; similar to S. cerevisiae Sec20p; depletion causes membrane accumulation and drug sensitivity; expression regulated by growth phase; O-mannosylation regulates proteolysis; does not complement S. cerevisiae sec20-1 mutant	0	3	E
Plate 10	D07	18	orf19.379		NA	Deleted from genome assembly	#N/A	#N/A	#N/A
Plate 10	D08	38	orf19.2717	SAS10	C4_02790C_A	Putative U3-containing small subunit processome complex subunit; Hap43p-induced gene; mutation confers resistance to 5-fluorocytosine (5-FC); repressed upon high-level peroxide stress	0	4	E
Plate 10	D09	3	orf19.6821		C3_06810W_A	Ortholog(s) have ubiquitin-protein ligase activity	0	0	NE
Plate 10	D10	5	orf19.7361		C3_05800W_A	Ortholog(s) have tRNA-intron endonuclease activity, role in tRNA-type intron splice site recognition and cleavage and mitochondrial outer membrane, tRNA-intron endonuclease complex localization	0	0	NE
Plate 10	D11	478	orf19.1136		C1_11800C_A	Ortholog(s) have cytosol, nucleus localization	0	0	NE
Plate 10	D12	473	orf19.5242	CDC6	C1_12220W_A	Putative ATP-binding protein with a predicted role in DNA replication; member of conserved Mcm1p regulon; periodic mRNA expression, peak at cell-cycle M/G1 phase	0	4	E
Plate 10	E01	474	orf19.3960	HYS2	C5_04740C_A	Putative DNA polymerase III (delta) subunit with a predicted role in DNA replication and DNA repair; cell-cycle regulated periodic mRNA expression	0	1	GD
Plate 10	E02	476	orf19.5196	ESS1	C1_04410C_A	Prolyl isomerase (parvulin class); essential; involved in yeast-hyphal switching, Cph1p pathway; has inflexible linker between WW and isomerase domains, unlike human homolog; functional homolog of S. cerevisiae Ess1p	0	0	NE
Plate 10	E03	460	orf19.4030		C5_05350W_A	Ortholog(s) have DNA primase activity, single-stranded DNA binding activity, role in DNA replication, synthesis of RNA primer, telomere maintenance and alpha DNA polymerase:primase complex localization	0	4	E
Plate 10	E04	608	orf19.6881	YTH1	C2_05690C_A	Putative mRNA cleavage and polyadenylation specificity factor; transcription is regulated upon yeast-hyphal switch; decreased expression in hyphae compared to yeast-form cells; fluconazole or flucytosine induced	0	4	E
Plate 10	E05	407	orf19.5027	LCB2	C1_13900C_A	Putative serine palmitoyltransferase component; mutation confers hypersensitivity to aureobasidin A	0	4	E
Plate 10	E06	593	orf19.2775	IDI1	C4_02280W_A	Ortholog(s) have isopentenyl-diphosphate delta-isomerase activity, role in farnesyl diphosphate biosynthetic process and cytosol, nucleus localization	0	4	E
Plate 10	E07	603	orf19.3027		C1_03310W_A	Putative DNA translocase; Spider biofilm repressed	0	4	E
Plate 10	E08	477	orf19.1137		C1_11790W_A	Ortholog(s) have thymidylate kinase activity, uridylate kinase activity, role in dTDP biosynthetic process, dTTP biosynthetic process, dUDP biosynthetic process, nucleotide phosphorylation and cytosol, nucleus localization	0	0	NE
Plate 10	E09	479	orf19.2288	CCT5	C2_07310W_A	T-complex protein 1, epsilon subunit; protein present in exponential and stationary growth phase yeast cultures; Spider biofilm repressed	0	1	GD
Plate 10	E10	480	orf19.2289	ARP3	C2_07320W_A	Protein with Myo5p-dependent localization to cortical actin patches at hyphal tip; mutation confers hypersensitivity to cytochalasin D; Spider biofilm repressed	0	0	NE
Plate 10	E11	484	orf19.4817	RAM2	C1_09530W_A	Alpha subunit of heterodimeric protein geranylgeranyltransferase type I and farnesyltransferase; a-specific transcription; lovastatin and fluconazole regulated; GGTase I enzyme binds zinc, is Mg-dependent; Cdc42p is GGTase I substrate	0	3.75	GD
Plate 10	E12	410	orf19.4223	GCD11	C5_02170C_A	Gamma subunit of translation initiation factor eIF2; involved in identification of the start codon; likely essential for growth, based on an insertional mutagenesis strategy; Spider biofilm repressed	0	4	E
Plate 10	F01	437	orf19.6702	DED81	C7_03670W_A	Putative tRNA-Asn synthetase; genes encoding ribosomal subunits, translation factors, tRNA synthetases are downregulated upon phagocytosis by murine macrophage; protein enriched in stationary phase yeast cultures	0	4	E
Plate 10	F02	438	orf19.6701		C7_03660C_A	Protein with similarity to amino acid-tRNA ligase; stationary phase enriched protein; GlcNAc-induced protein	0	4	E
Plate 10	F03	440	orf19.1029		C1_03800W_A	Putative ortholog of S. cerevisiae Rpp1; subunit of both RNase MRP and nuclear RNase P; rat catheter and Spider biofilm induced	0	1	GD
Plate 10	F04	441	orf19.1626		C3_02180C_A	Deoxyhypusine synthase; catalyzes formation of deoxyhypusine, the first step in hypusine biosynthesis; Spider biofilm repressed	0	0.5	GD
Plate 10	F05	443	orf19.1570	ERG7	C2_02460W_A	2,3-epoxysqualene-lanosterol cyclase (lanosterol synthase), conversion of 2,3-oxidosqualene to lanosterol in sterol biosynthesis; fluconazole-induced; possibly essential, disruptants not obtained by UAU1 method; rat catheter biofilm induced	0	4	E
Plate 10	F06	444	orf19.596.1	NOP10	CR_08020C_A	Small nucleolar ribonucleoprotein; flucytosine induced	0	4	E
Plate 10	F07	446	orf19.6455		C7_02550C_A	Protein of unknown function, transcript is upregulated in clinical isolates from HIV+ patients with oral candidiasis	0	0	NE
Plate 10	F08	448	orf19.7488		CR_00460C_A	Component of the SSU processome; predicted role in pre-18S rRNA processing; Spider biofilm induced	0	4	E
Plate 10	F09	486	orf19.4625	TOA2	C4_01680W_A	Putative TFIIA small subunit; protein abundance decreased in CAI4 strain compared to the SC5314 strain, abundance not affected by reintegration of URA3 in CAI4; flucytosine induced; possibly an essential gene (UAU1 method)	0	3.5	E
Plate 10	F10	488	orf19.1618	GFA1	C3_02280C_A	Glucosamine-6-phosphate synthase, homotetrameric enzyme of chitin/hexosamine biosynthesis; inhibited by UDP-GlcNAc, FMDP, N-acyl peptide, kanosamine-6-P; functional homolog of S. cerevisiae Gfa1p; Cagrowth-phase regulated; catalytic Cys	0	4	E
Plate 10	F11	489	orf19.443		C1_05230W_A	Ortholog(s) have DNA-directed RNA polymerase activity, role in tRNA transcription from RNA polymerase III promoter, transcription initiation from RNA polymerase III promoter and DNA-directed RNA polymerase III complex, cytosol localization	0	0	NE
Plate 10	F12	490	orf19.441	RPT1	C1_05240C_A	Putative 26S proteasome regulatory subunit 7; Hap43p-repressed gene; regulated by Gcn2p and Gcn4p; overlaps orf19.442	0	4	E
Plate 10	G01	491	orf19.4492		C2_04570W_A	Ortholog(s) have role in nuclear division, rRNA processing and nuclear periphery, nucleolus, preribosome, large subunit precursor, spindle pole body localization	0	4	E
Plate 10	G02	492	orf19.2974	YKT6	C1_02860C_A	Putative protein of the vacuolar SNARE complex with a predicted role in vacuolar fusion	0	0	NE
Plate 10	G03	493	orf19.7438	UBA1	C3_06500W_A	Ubiquitin-activating enzyme; protein level decreases in stationary phase cultures	0	4	E
Plate 10	G04	494	orf19.5425		C3_00420W_A	Ortholog(s) have 3'-tRNA processing endoribonuclease activity, role in tRNA 3'-trailer cleavage, endonucleolytic and mitochondrion, nucleus localization	0	0.5	GD
Plate 10	G05	495	orf19.2818		CR_02590C_A	Ortholog(s) have RNA-dependent ATPase activity, second spliceosomal transesterification activity, role in generation of catalytic spliceosome for second transesterification step and U2-type catalytic step 2 spliceosome localization	0	0	NE
Plate 10	G06	546	orf19.3867	RPL7	CR_06120W_A	Ribosomal protein L7; repressed upon phagocytosis by murine macrophages; Hap43-induced; rat catheter and Spider biofilm induced	0	4	E
Plate 10	G07	547	orf19.3862		CR_06090W_A	Putative intracellular transport protein; heterozygous null mutant displays sensitivity to rapamycin; expression upregulated during growth in the mouse cecum	0	0.5	GD
Plate 10	G08	548	orf19.3861	SIS1	CR_06080W_A	Putative Type II HSP40 co-chaperone; macrophage/pseudohyphal-repressed; heavy metal (cadmium) stress-induced; heterozygous null mutant displays sensitivity to virgineone; rat catheter biofilm induced	0	0	NE
Plate 10	G09	549	orf19.501		CR_04170W_A	Ortholog(s) have nucleus, preribosome, large subunit precursor localization	0	4	E
Plate 10	G10	550	orf19.5873	POL1	C3_04300C_A	Putative DNA directed DNA polymerase alpha; RNA abundance regulated by cell cycle, tyrosol and cell density; rat catheter biofilm induced	0	4	E
Plate 10	G11	551	orf19.172	RPC19	CR_02520W_A	Putative RNA polymerases I and III subunit AC19; Hap43-induced; rat catheter biofilm induced	0	3	E
Plate 10	G12	552	orf19.6312	RPS3	CR_04810W_A	Ribosomal protein S3; Hog1, Hap43-induced; grepressed upon phagocytosis by murine macrophage; present in exponential and stationary phase cells; Spider biofilm repressed	0	4	E
Plate 10	H01	553	orf19.5682		C5_00150C_A	Ortholog(s) have protein binding, bridging, protein transporter activity	0	4	E
Plate 10	H02	554	orf19.1280	SUI1	C5_04090C_A	Putative translation initiation factor; flucytosine induced; genes encoding ribosomal subunits, translation factors, and tRNA synthetases are downregulated upon phagocytosis by murine macrophage	0	4	E
Plate 10	H03	129	orf19.5835		C2_02710C_A	Ortholog(s) have role in rRNA processing, ribosomal small subunit assembly and CURI complex, UTP-C complex, cytosol localization	0	4	E
Plate 10	H04	130	orf19.3898		C5_04150C_A	Ortholog(s) have SNAP receptor activity, role in endocytosis, vesicle fusion and Golgi apparatus, SNARE complex, endoplasmic reticulum, endosome, trans-Golgi network localization	0	0	NE
Plate 10	H05	136	orf19.512		CR_04240C_A	Ortholog of S. cerevisiae Kre33; essential; S. cerevisiae ortholog is essential and is required for biogenesis of the small ribosomal subunit	0	4	E
Plate 10	H06	139	orf19.7154	UTP18	C7_04190C_A	Putative U3 snoRNA-associated protein; Hap43-induced; repressed in core stress response; physically interacts with TAP-tagged Nop1	0	4	E
Plate 10	H07	140	orf19.7358	SAM50	C3_05770C_A	Predicted component of the SAM complex involved in mitochondrial protein import	0	0	NE
Plate 10	H08	142	orf19.1026		C1_03830C_A	Ortholog(s) have role in exonucleolytic trimming to generate mature 3'-end of 5.8S rRNA from tricistronic rRNA transcript (SSU-rRNA, 5.8S rRNA and LSU-rRNA), more	0	4	E
Plate 10	H09	138	orf19.7631	SLD5	CR_10520C_A	Putative GINS complex subunit; cell-cycle regulated periodic mRNA expression	0	0.75	GD
Plate 10	H10	95	orf19.5444	TIM44	C3_00250C_A	Protein involved in transport across membranes; Spider biofilm repressed	0	3.5	E
Plate 10	H11	98	orf19.2179	SIT1	C2_08050C_A	Transporter of ferrichrome siderophores, not ferrioxamine B; required for human epithelial cell invasion in vitro, not for mouse systemic infection; regulated by iron, Sfu1, Rfg1, Tup1, Hap43; rat catheter and Spider biofilm induced	0	0	NE
Plate 10	H12	194	orf19.1878	MED4	C2_07500C_A	RNA polymerase II core mediator complex subunit	0	0	NE
Plate 11	A01	197	orf19.1574		C2_02500W_A	Putative TFIID subunit involved in RNA polymerase II transcription initiation; possibly an essential gene, disruptants not obtained by UAU1 method	0	3.5	E
Plate 11	A02	198	orf19.5198	NOP4	C1_04390C_A	Putative nucleolar protein; Hap43-induced; mutation confers hypersensitivity to 5-fluorocytosine (5-FC), 5-fluorouracil (5-FU), and tubercidin (7-deazaadenosine); represses in core stress response	0	3	E
Plate 11	A03	200	orf19.5168		C7_02930C_A	Ortholog(s) have role in maturation of SSU-rRNA and cytosol, nucleolus localization	0	0.75	GD
Plate 11	A04	202	orf19.5722		C6_03550C_A	Ortholog(s) have DNA binding activity and role in chromatin silencing at rDNA, negative regulation of extrachromosomal rDNA circle accumulation involved in replicative cell aging, termination of RNA polymerase I transcription	0	0	NE
Plate 11	A05	203	orf19.7285		CR_08900C_A	Ortholog(s) have role in mRNA cleavage, mRNA polyadenylation, snoRNA 3'-end processing, termination of RNA polymerase II transcription, exosome-dependent, termination of RNA polymerase II transcription, poly(A)-coupled	0	4	E
Plate 11	A06	101	orf19.5008.1	DAD1	C1_13710C_A	Subunit of the Dam1 (DASH) complex, which acts in chromosome segregation by coupling kinetochores to spindle microtubules	0	4	E
Plate 11	A07	117	orf19.4133		C5_01430C_A	Protein wth a predicted role in transcription from RNA polymerase II promoters; Spider biofilm induced	0	0.5	GD
Plate 11	A08	62	orf19.3970		C5_04840C_A	Putative ribosome biogenesis factor; possibly essential, disruptants not obtained by UAU1 method; rat catheter and Spider biofilm induced	0	0.75	GD
Plate 11	A09	108	orf19.2325		C1_10920W_A	Ortholog(s) have RNA polymerase III type 1 promoter sequence-specific DNA binding and RNA polymerase III type 1 promoter sequence-specific DNA binding TFIIIB recruiting transcription factor activity, more	0	0	NE
Plate 11	A10	74	orf19.3333		C1_01470W_A	Ortholog(s) have poly(A) RNA binding activity, role in mRNA polyadenylation, poly(A)+ mRNA export from nucleus, regulation of mRNA stability and cytoplasm, nucleus localization	0	0	NE
Plate 11	A11	97	orf19.5850	NOC2	CR_05520W_A	Putative nucleolar complex protein; Hap43-induced; transposon mutation affects filamentous growth; mutation confers hypersensitivity to 5-fluorouracil (5-FU), tubercidin (7-deazaadenosine); repressed in core stress response	0	4	E
Plate 11	A12	109	orf19.88	ILV5	C6_00870C_A	Ketol-acid reductoisomerase; antigenic in human/murine infection; regulated by Gcn4; GlcNAc, amino acid starvation (3-AT)-induced; macrophage-repressed protein; protein present in exponential and stationary phase; Spider biofilm repressed	0	3.5	E
Plate 11	B01	113	orf19.2389		CR_03340C_A	Ortholog(s) have DNA replication origin binding, single-stranded DNA binding activity	0	0	NE
Plate 11	B02	116	orf19.6373	DCP2	CR_08120C_A	Ortholog(s) have m7G(5')pppN diphosphatase activity, mRNA binding activity and role in deadenylation-dependent decapping of nuclear-transcribed mRNA, deadenylation-independent decapping of nuclear-transcribed mRNA, stress granule assembly	0	0	NE
Plate 11	B03	146	orf19.6648	SDA1	CR_05660W_A	Predicted nuclear protein involved in actin cytoskeleton organization, passage through Start, 60S ribosome biogenesis; rat catheter biofilm induced; Hap43-induced	0	4	E
Plate 11	B04	150	orf19.3553	RPF2	C2_05230C_A	Putative pre-rRNA processing protein; Hap43p-induced gene; mutation confers hypersensitivity to 5-fluorocytosine (5-FC), 5-fluorouracil (5-FU), and tubercidin (7-deazaadenosine)	0	4	E
Plate 11	B05	174	orf19.7197		C7_03850W_A	Putative intranuclear transport and DNA replication mediator; heterozygous null mutant exhibits resistance to parnafungin in the C. albicans fitness test; Spider biofilm induced	0	4	E
Plate 11	B06	179	orf19.4203		C6_00560W_A	Ortholog(s) have role in nuclear pore organization, spindle pole body duplication associated with nuclear envelope and nuclear pore transmembrane ring, spindle pole body localization	0	0	NE
Plate 11	B07	128	orf19.410.3		C1_05560W_A	Lumazine synthase (6,7-dimethyl-8-ribityllumazine synthase, DMRL synthase); catalyzes the penultimate step in the synthesis of riboflavin; Hap43-induced; Spider biofilm repressed	0	0	NE
Plate 11	B08	617	orf19.3334	RPS21	C1_01480C_A	Protein component of the small (40S) subunit; repressed upon phagocytosis by murine macrophage; positively regulated by Tbf1; Spider biofilm repressed	0	4	E
Plate 11	B09	643	orf19.1901	MCM3	C2_07350W_A	Putative DNA replication protein; periodic mRNA expression, peak at cell-cycle M/G1 phase; Spider biofilm induced	0	4	E
Plate 11	B10	641	orf19.567	TFB3	C5_00690C_A	Putative C3HC4 zinc finger transcription factor; transcript positively regulated by Tbf1; Spider biofilm induced	0	4	E
Plate 11	B11	609	orf19.7286	RPN7	CR_08910C_A	Subunit of the proteasome regulatory particle; regulated by Gcn2p and Gcn4p; protein present in exponential and stationary growth phase yeast cultures	0	4	E
Plate 11	B12	610	orf19.3564	RPC40	C2_05340C_A	Puttive RNA polymerase; protein level decreases in stationary phase cultures; Hap43p-induced gene	0	3.5	E
Plate 11	C01	604	orf19.3647	SEC8	C6_00780W_A	Predicted subunit of the exocyst complex, involved in exocytosis; localizes to a crescent on the surface of the hyphal tip	0	1.25	GD
Plate 11	C02	642	orf19.670	SMT3	C1_11330C_A	SUMO, small ubiquitin-like protein; Smt3p-conjugated proteins localize to septation site and mother side of bud neck; C. albicans septins appear not to be Smt3p-modified, in contrast to S. cerevisiae septins	0	0	NE
Plate 11	C03	654	orf19.2425.2	RPL28	CR_03030C_A	Putative ribosomal protein; Plc1-regulated; downregulated upon phagocytosis by murine macrophage; Spider biofilm repressed	0	4	E
Plate 11	C04	599	orf19.336	YAH1	C3_03390C_A	Protein similar to oxidoreductases; induced in high iron; Hap43-repressed	0	0	NE
Plate 11	C05	451	orf19.6437	CDC23	CR_08630W_A	Similar to anaphase-promoting complex component; possibly transcriptionally regulated by Tac1p	0	3.5	E
Plate 11	C06	614	orf19.5073	DPM1	C1_08010W_A	Putative dolichol phosphate mannose synthase; filament induced; Tup1-regulated	0	0	NE
Plate 11	C07	612	orf19.7563	BET2	CR_09890C_A	Putative Type II geranylgeranyltransferase beta subunit; transcript regulated by Mig1	0	4	E
Plate 11	C08	615	orf19.4125		C2_04860W_A	C2H2 transcription factor; Hap43-induced; rat catheter and Spider biofilm induced	0	0	NE
Plate 11	C09	408	orf19.407	GCD6	C1_08600C_A	Ortholog of S. cerevisiae Gcd6; catalytic epsilon subunit of the translation initiation factor eIF2B; genes encoding translation factors are repressed by phagocytosis by murine macrophages	0	2.5	GD
Plate 11	C10	187	orf19.7449		C3_06600C_A	Ortholog(s) have role in mitochondrial genome maintenance, plasmid maintenance and cytosol, mitochondrion localization	0	0	NE
Plate 11	C11	515	orf19.7569	SIK1	CR_09950C_A	Putative U3 snoRNP protein; Hap43p-induced gene; physically interacts with TAP-tagged Nop1p	0	4	E
Plate 11	C12	517	orf19.4268	UTP13	C5_02550C_A	Putative U3 snoRNA-associated protein; Hap43-induced; repressed in core stress response; physically interacts with TAP-tagged Nop1	0	3.5	E
Plate 11	D01	660	orf19.7673		CR_10820W_A	Ortholog(s) have mRNA binding activity, role in mRNA splicing, via spliceosome and U1 snRNP, U2-type prespliceosome, U4/U6 x U5 tri-snRNP complex, U5 snRNP, commitment complex localization	0	4	E
Plate 11	D02	665	orf19.3013	CDC12	C1_03210C_A	Septin; essential for viability; forms ring at sites of cell division and also forms filaments in mature chlamydospore; filamentous growth induced; regulated by Nrg1, Tup1, tyrosol and cell density; rat catheter biofilm repressed	0	3.5	E
Plate 11	D03	669	orf19.3990		C5_04990W_A	Ortholog(s) have DNA-directed RNA polymerase activity, role in tRNA transcription from RNA polymerase III promoter, transcription initiation from RNA polymerase III promoter and DNA-directed RNA polymerase III complex, cytosol localization	0	0	NE
Plate 11	D04	673	orf19.1896	SSC1	C2_07380W_A	Heat shock protein; at yeast-form cell surface, not hyphae; antigenic; Gcn4-regulated; induced by amino acid starvation (3-AT) or by adherence to polystyrene; macrophage-repressed; sumoylation target; possibly essential	0	4	E
Plate 11	D05	687	orf19.4363	SGD1	CR_03650W_A	Predicted small ribosomal subunit biogenesis protein; repressed in core stress response; transcript increases in populations of cells exposed to fluconazole over multiple generations; Spider biofilm induced	0	1	GD
Plate 11	D06	91	orf19.6369	RIO2	CR_08100C_A	Putative serine kinase with a predicted role in the processing of the 20S pre-rRNA into mature 18S rRNA; null mutants are hypersensitive to caspofungin	0	0	NE
Plate 11	D07	229	orf19.640		CR_05140W_A	Integral membrane protein of the ER; role in the synthesis of beta-1,6-glucan in the cell wall; S. cerevisiae ortholog required for cell viability; Spider biofilm induced	0.25	0.75	GD
Plate 11	D08	238	orf19.4659		C4_01280C_A	Ortholog(s) have RNA binding activity, role in mRNA splicing, via spliceosome and U2-type prespliceosome localization	0	4	E
Plate 11	D09	245	orf19.4499	RIM2	C2_04510W_A	Putative mitochondrial carrier protein; induced by alpha pheromone in SpiderM medium; Spider biofilm induced	0	0	NE
Plate 11	D10	250	orf19.1352	TIM22	C2_08310W_A	Mitochondrial inner membrane protein; predicted role in protein import; Hap43-repressed gene; flow model biofilm induced; Spider biofilm repressed	0	3	E
Plate 11	D11	75	orf19.2362		CR_07030C_A	Putative 90S preribosome component; Hap43p-induced gene; possibly an essential gene, disruptants not obtained by UAU1 method	0	0.75	GD
Plate 11	D12	77	orf19.2825		CR_02650C_A	Putative cytosolic Fe-S protein assembly protein; a-specific transcript; regulated by Sef1, Sfu1, and Hap43; rat catheter and Spider biofilm induced	0	0	NE
Plate 11	E01	79	orf19.5066		C1_07950C_A	Putative pre-60S pre-ribosomal particle subunit; essential gene; S. cerevisiae ortholog RRP17 is essential; Hap43p-induced; rat catheter biofilm induced	0	0	NE
Plate 11	E02	80	orf19.6903		C7_01210C_A	Predicted RNA polymerase III subunit C37; Spider biofilm induced	0	2.25	GD
Plate 11	E03	81	orf19.2519		CR_01360W_A	Ortholog(s) have role in chromosome segregation and nuclear MIS12/MIND type complex localization	0	4	E
Plate 11	E04	82	orf19.7072	PEL1	C7_00470C_A	Predicted enzyme of mitochondrial phospholipid biosynthesis; rat catheter and flow model biofilm induced	#N/A	#N/A	#N/A
Plate 11	E05	84	orf19.3551	DAD2	C2_05210W_A	Essential subunit of the Dam1 (DASH) complex, which acts in chromosome segregation by coupling kinetochores to spindle microtubules	0	4	E
Plate 11	E06	555	orf19.4931		C1_13030C_A	Putative tRNA-Cys synthetase; induced by alpha pheromone in SpiderM medium; ribosomal subunits, translation factors, tRNA synthetases are downregulated upon phagocytosis by murine macrophage	0	4	E
Plate 11	E07	726	orf19.7343		CR_09480W_A	Ortholog(s) have role in mRNA splicing, via spliceosome and U4/U6 x U5 tri-snRNP complex localization	0	3	E
Plate 11	E08	622	orf19.2287	RPA12	C2_07300C_A	Putative DNA-directed RNA polymerase I; induced upon adherence to polystyrene	0	3	E
Plate 11	E09	730	orf19.7548	MED21	CR_09760W_A	Ortholog(s) have RNA polymerase II repressing transcription factor binding, RNA polymerase II transcription coactivator activity, RNA polymerase II transcription corepressor activity	0	0	NE
Plate 11	E10	483	orf19.3250		CR_01050C_A	Ortholog(s) have RNA binding activity, role in mRNA cis splicing, via spliceosome and U1 snRNP, U2-type prespliceosome localization	0	0	NE
Plate 11	E11	627	orf19.2557	SEC65	CR_01660C_A	Component of the protein-targeting Signal Recognition Particle (SRP); similar to mammalian Srp19; functional homolog of S. cerevisiae Sec65; Tbf1-induced	0	0	NE
Plate 11	E12	481	orf19.6463		C7_02460C_A	Putative ortholog of S. cerevisiae Npa3p; possibly essential for growth (however, depletion mutant is viable)	0	3.5	E
Plate 11	F01	637	orf19.6479	SEC1	C7_02320W_A	Ortholog(s) have SNARE binding activity and role in positive regulation of vesicle fusion, vesicle docking involved in exocytosis	0	0	NE
Plate 11	F02	621	orf19.5887	NUP85	C3_04400C_A	Ortholog of S. cerevisiae Nup85; a structural constituent of the nuclear pore; required for alkaline-induced hyphal morphogenesis and for SD or Spider media biofilm formation	0	0	NE
Plate 11	F03	533	orf19.7312	ERG13	CR_09160C_A	3-hydroxy-3-methylglutaryl coenzyme A synthase; ergosterol biosynthesis; sumoylation target; Tn mutation affects filamentation; amphotericin B, caspofungin repressed; exponential, stationary growth phase expressed; Spider biofilm repressed	0	4	E
Plate 11	F04	560	orf19.1886	RCL1	C2_07450C_A	Putative U3-containing 90S preribosome processome complex subunit; Hap43-induced; essential; S. cerevisiae ortholog is essential; represses in core stress response;	0	1	GD
Plate 11	F05	561	orf19.7658	RFC4	CR_10700W_A	Putative heteropentameric replication factor C subunit; flucytosine induced; periodic mRNA expression, peak at cell-cycle G1/S phase	0	0	NE
Plate 11	F06	562	orf19.7626	EIF4E	CR_10490W_A	Translation initiation factor eIF4E; genes encoding ribosomal subunits, translation factors, tRNA synthetases downregulated by phagocytosis by macrophage; alternatively spliced intron in 5' UTR; protein levels decrease in stationary phase	0	0	NE
Plate 11	F07	563	orf19.4681	RAT1	C4_01080W_A	5'-->3' exoribonuclease; similar to S. cerevisiae nuclear exoribonuclease Rat1p; suppresses S. cerevisiae kem1 mutant slow growth, mating defect, and haploid invasive growth defect	0	3.5	E
Plate 11	F08	564	orf19.6955	HBR3	C3_03650W_A	Essential protein; regulated by hemoglobin; S. cerevisiae ortholog is essential; Hap43p-induced gene	0	0.75	GD
Plate 11	F09	565	orf19.1601	RPL3	C2_09430W_A	Ribosomal protein, large subunit; induced by ciclopirox olamine treatment; genes encoding cytoplasmic ribosomal subunits are downregulated upon phagocytosis by murine macrophages; Hap43-induced gene; Spider biofilm repressed	0	4	E
Plate 11	F10	566	orf19.3817		C4_04650W_A	Ortholog(s) have cytoplasm, nucleolus localization	0	0	NE
Plate 11	F11	567	orf19.1761		C2_10200W_A	Predicted olichyl-diphosphooligosaccharide-protein glycotransferase; role in protein N-linked glycosylation; Spider biofilm repressed	0	0.5	GD
Plate 11	F12	568	orf19.3103		C4_07060W_A	Ortholog(s) have DNA-directed RNA polymerase activity, role in tRNA transcription from RNA polymerase III promoter and DNA-directed RNA polymerase III complex, cytoplasm localization	0	4	E
Plate 11	G01	569	orf19.3123	RPT5	C4_06870W_A	26S proteasome regulatory subunit; transcript regulated by Nrg1 and Mig1; regulated by Gcn2 and Gcn4; protein level decreases in stationary phase	0	4	E
Plate 11	G02	570	orf19.3349		C1_01590C_A	Putative RNA polymerase II subunit B150; heterozygous null mutant exhibits resistance to parnafungin in the C. albicans fitness test	0	4	E
Plate 11	G03	571	orf19.7605	PUP1	CR_10300W_A	Putative beta 2 subunit of the 20S proteasome; macrophage/pseudohyphal-repressed; Spider biofilm repressed	0	4	E
Plate 11	G04	572	orf19.4205.1		C6_00530C_A	Ortholog(s) have role in mRNA splicing, via spliceosome and U1 snRNP, U2-type prespliceosome, U4/U6 x U5 tri-snRNP complex, U5 snRNP, cytosol localization	0	4	E
Plate 11	G05	574	orf19.2682		C4_03090W_A	Ortholog(s) have TBP-class protein binding, TBP-class protein binding RNA polymerase II transcription factor activity involved in preinitiation complex assembly activity	0	3.5	E
Plate 11	G06	575	orf19.5847		CR_05550C_A	Ortholog(s) have DNA-directed RNA polymerase activity, role in tRNA transcription from RNA polymerase III promoter and DNA-directed RNA polymerase III complex, cytosol localization	0	4	E
Plate 11	G07	576	orf19.2687.1		C4_03040W_A	Ortholog(s) have DNA-directed RNA polymerase activity, RNA-directed RNA polymerase activity	0	4	E
Plate 11	G08	577	orf19.6891	RFC1	C2_05790C_A	Protein similar to S. cerevisiae Rfc1p, a subunit of DNA replication factor C; likely to be essential for growth, based on an insertional mutagenesis strategy	0	0	NE
Plate 11	G09	578	orf19.6314	RPB8	CR_04780W_A	Putative subunit of RNA polymerases I, II, and III; regulated by Gcn4p; repressed in response to amino acid starvation (3-aminotriazole treatment); heterozygous null mutant exhibits resistance to parnafungin	0	4	E
Plate 11	G10	579	orf19.2524	MGE1	CR_01390W_A	Putative mitochondrial matrix cochaperone; macrophage/pseudohyphal-repressed	0	2.5	GD
Plate 11	G11	580	orf19.482	RPT4	CR_04000W_A	26S proteasome regulatory subunit; regulated by Gcn2p and Gcn4p; protein level decreases in stationary phase cultures	0	4	E
Plate 11	G12	542	orf19.5351	TIF11	C2_10710W_A	Translation initiation factor eIF1a; possibly transcriptionally regulated upon hyphal formation; genes encoding ribosomal subunits, translation factors, and tRNA synthetases are downregulated upon phagocytosis by murine macrophage	0	4	E
Plate 11	H01	701	orf19.7050	NOP15	C7_00690W_A	Nucleolar ribosome biogenesis factor; hyphal-induced expression; Hap43-induced; rat catheter biofilm induced	0	4	E
Plate 11	H02	76	orf19.3060		C1_03600W_A	OPutative dolichyl-diphosphooligosaccharide-protein glycotransferase; role in protein N-linked glycosylation; Spider biofilm repressed	0	0.5	GD
Plate 11	H03	83	orf19.6742		C3_07460W_A	Ortholog(s) have CTD phosphatase activity and role in cellular protein complex assembly, dephosphorylation of RNA polymerase II C-terminal domain, negative regulation of G0 to G1 transition, regulation of cell cycle cytokinesis	0	2.25	GD
Plate 11	H04	86	orf19.6233		C1_06770W_A	Ortholog(s) have endoplasmic reticulum, nuclear envelope localization	0	3.25	GD
Plate 11	H05	87	orf19.2367		CR_06980W_A	Putative protein of unknown function; Hap43-induced; repressed by Rim101; Spider biofilm induced	0	0.75	GD
Plate 11	H06	88	orf19.6884	GWT1	C2_05730C_A	Inositol acyltransferase with role in early steps of GPI anchor biosynthetic process; antifungal drug target	0	0	NE
Plate 11	H07	93	orf19.6917		C7_01360C_A	Putative heat shock protein with a zinc finger motif; required for protein import into mitochondria in S. cerevisiae; Spider biofilm induced	0	0	NE
Plate 11	H08	99	orf19.4168		C4_00740W_A	Ortholog(s) have ribonuclease MRP activity, ribonuclease P activity, role in intronic box C/D snoRNA processing, mRNA cleavage and nucleolar ribonuclease P complex, ribonuclease MRP complex localization	0	3	E
Plate 11	H09	152	orf19.5268	MED10	C1_11980W_A	RNA polymerase II mediator complex subunit; possibly an essential gene, disruptants not obtained by UAU1 method	0	0	NE
Plate 11	H10	64	orf19.6512	EXO70	C7_02050C_A	Predicted subunit of the exocyst complex, involved in exocytosis; localizes to a crescent on the surface of the hyphal tip	0	0	NE
Plate 11	H11	102	orf19.700	SEO1	CR_06660W_A	Protein with similarity to permeases; Sfu1-repressed; flucytosine induced; induced by Mnl1 under weak acid stress	0	0	NE
Plate 11	H12	103	orf19.688		C6_01980C_A	Mitochondrial ribosomal protein of the small subunit; S. cerevisiae ortholog is essential for viability; Spider biofilm repressed	0	0.75	GD
Plate 12	A01	110	orf19.2735	SEN2	C4_02640C_A	Putative tRNA splicing endonuclease subunit; mutation confers hypersensitivity to toxic ergosterol analog and to amphotericin B; 5'-UTR intron; Hap43-induced; Spider biofilm induced	0	4	E
Plate 12	A02	115	orf19.5346		C2_10680W_A	Ortholog(s) have role in transcription from RNA polymerase II promoter and transcription factor TFIID complex localization	0	4	E
Plate 12	A03	211	orf19.5551	MIF2	C6_02780C_A	Centromere-associated protein; similar to CENP-C proteins; Cse4p and Mif2p colocalize at C. albicans centromeres	0	4	E
Plate 12	A04	222	orf19.6923		C3_03930W_A	Ortholog(s) have chromatin binding activity, role in RNA polymerase II transcriptional preinitiation complex assembly and transcription factor TFIID complex localization	0	0	NE
Plate 12	A05	220	orf19.832	GPI13	C2_03920C_A	Major facilitator superfamily protein; has phosphodiesterase/nucleotide pyrophosphatase domain; similar to S. cerevisiae Gpi13p, which acts in GPI anchor biosynthesis; Hap43p-induced gene	0	0	NE
Plate 12	A06	218	orf19.124	CIC1	C6_01170W_A	Putative proteasome-interacting protein; rat catheter biofilm induced	0	0	NE
Plate 12	A07	212	orf19.4626		C4_01670C_A	Ortholog(s) have role in TOR signaling cascade, positive regulation of transcription from RNA polymerase I promoter and cytosol, extrinsic to membrane, nucleus localization	0	0	NE
Plate 12	A08	223	orf19.1386		C2_09680W_A	Ortholog(s) have SNAP receptor activity and role in ER to Golgi vesicle-mediated transport, retrograde vesicle-mediated transport, Golgi to ER, vesicle fusion	0	4	E
Plate 12	A09	217	orf19.5039		C4_03840C_A	Putative exosome non-catalytic core component; involved in 3'-5' RNA processing; rat catheter biofilm induced	0	4	E
Plate 12	A10	214	orf19.7624		CR_10470C_A	Ortholog(s) have role in rRNA processing and 90S preribosome, nucleolus localization	0	0	NE
Plate 12	A11	201	orf19.1941	NUF2	C5_01280C_A	Kinetochore component; amount of Nuf2p and Mtw1p protein detected at each centromere is consistent with a single kinetochore microtubule attachment site	0	0	NE
Plate 12	A12	204	orf19.7634	MCD1	CR_10540C_A	Alpha-kleisin cohesin complex subunit; for sister chromatid cohesion in mitosis and meiosis; repressed by alpha pheromone in SpiderM medium; periodic cell-cycle expression; Hap43-repressed; rat catheter and Spider biofilm repressed	0	4	E
Plate 12	B01	230	orf19.1361	TIM23	C2_09900C_A	Protein involved in mitochondrial matrix protein import	0	4	E
Plate 12	B02	231	orf19.491		CR_04080C_A	Endoplasmic reticulum (ER) protein-translocation complex subunit	0	4	E
Plate 12	B03	232	orf19.793	CAK1	C2_04270W_A	Monomeric CDK-activating kinase; functional homolog of S. cerevisiae Cak1p; phosphorylates cyclin-free human CDK2; lacks glycine loop motif; conserved lysine (K36) not required for activity; possibly essential gene (by UAU1 method)	0	0	NE
Plate 12	B04	234	orf19.4353	ULP2	CR_03820C_A	SUMO deconjugation enzyme; removes the small ubiquitin-like modifier (SUMO) from proteins; Spider biofilm induced	0	0	NE
Plate 12	B05	235	orf19.2267	RFA2	C2_07120W_A	Putative DNA replication factor A; RNA abundance regulated by cell cycle, tyrosol and cell density	0	4	E
Plate 12	B06	236	orf19.6052	CNS1	C1_00560W_A	Putative co-chaperone; Hap43p-induced gene; mutation confers hypersensitivity to radicicol	0	1	GD
Plate 12	B07	237	orf19.3831		C4_04520W_A	Ortholog(s) have telomerase inhibitor activity, role in box C/D snoRNA 3'-end processing, negative regulation of telomere maintenance via telomerase and nucleolus, nucleoplasm localization	0	0	NE
Plate 12	B08	6	orf19.474		CR_03930C_A	Ortholog(s) have role in mRNA export from nucleus, nuclear envelope organization, protein export from nucleus and endoplasmic reticulum, nuclear envelope localization	0	3.5	E
Plate 12	B09	9	orf19.423		C1_05420W_A	Ortholog(s) have enzyme activator activity, m7G(5')pppN diphosphatase activity, mRNA binding activity, role in deadenylation-dependent decapping of nuclear-transcribed mRNA and cytoplasmic mRNA processing body localization	0	0	NE
Plate 12	B10	195	orf19.2715	RPC53	C4_02800W_A	Ortholog(s) have DNA-directed RNA polymerase activity, role in tRNA transcription from RNA polymerase III promoter and DNA-directed RNA polymerase III complex localization	0	1	GD
Plate 12	B11	154	orf19.4190	PAM18	C4_00520W_A	Predicted component of the presequence translocase-associated import motor (PAM complex) involved in protein import into mitochondrial matrix; rat catheter biofilm induced	0	4	E
Plate 12	B12	155	orf19.3304		C1_01160C_A	Exosome non-catalytic core component; involved in 3'-5' RNA processing and degradation in the nucleus and cytoplasm; Spider biofilm induced	0	4	E
Plate 12	C01	159	orf19.910		C2_03200W_A	Predicted splicing factor, component of the U4/U6-U5 snRNP complex; Hap43-induced gene; rat catheter biofilm induced	0	3.5	E
Plate 12	C02	157	orf19.7615		CR_10390W_A	Protein involved in endoplasmic reticulum (ER) to Golgi vesicle-mediated transport; putative subunit of the transport protein particle (TRAPP) complex of the cis-Golgi; Spider biofilm induced	0	4	E
Plate 12	C03	168	orf19.1622	YCG1	C3_02230C_A	Putative condensin G	0	2.75	GD
Plate 12	C04	162	orf19.544		CR_04540C_A	Ortholog(s) have ribonuclease P activity, role in intronic box C/D snoRNA processing and cytosol, nucleolar ribonuclease P complex localization	0	4	E
Plate 12	C05	163	orf19.3531		C2_04990W_A	Ortholog(s) have role in regulation of DNA-dependent DNA replication initiation and DNA replication preinitiation complex, endoplasmic reticulum, nuclear envelope, spindle pole body localization	0	0	NE
Plate 12	C06	165	orf19.232		C3_02440C_A	RNA polymerase II mediator complex subunit; possibly an essential gene, disruptants not obtained by UAU1 method	0	0	NE
Plate 12	C07	177	orf19.6544	LPI9	C7_01780W_A	Protein phosphatase type 1 regulator; role in chromosome segregation, regulation of phosphoprotein phosphatase activity; rat catheter and Spider biofilm induced	0	0	NE
Plate 12	C08	2476	orf19.24	RTA2	C2_06470W_A	Putative flippase; sphingolipid long chain base release; mediates calcineurin-dependent resistance to azoles; stress-associated protein; Ca2+, calcineurin-regulated; ketoconazole, caspofungin induced; Plc1-regulated; Spider biofilm induced	0	0	NE
Plate 12	C09	3394	orf19.1152		C1_11670W_A	Protein of unknown function; induced in core stress response; Gcn2 and Gcn4 regulated; flow model biofilm induced; Spider biofilm induced	0	0	NE
Plate 12	C10	2036	orf19.2246		C2_06920C_A	Ortholog(s) have cytosol, nucleus localization	0	0	NE
Plate 12	C11	3403	orf19.6477		C7_02340C_A	Ortholog(s) have tRNA (guanine-N7-)-methyltransferase activity, role in tRNA methylation and cytosol, nucleus, tRNA methyltransferase complex localization	0	0	NE
Plate 12	C12	2104	orf19.4026	HIS1	C5_05320C_A	ATP phosphoribosyl transferase; enzyme of histidine biosynthesis; acid upregulated/alkaline repressed by Rim101; regulated by Gcn2, Gcn4; strain CA9 is a his1 mutant; flow model biofilm induced; Spider biofilm repressed	0	2	E
Plate 12	D01	2365	orf19.4884	WOR1	C1_10150W_A	Transcription factor ("master switch") of white-opaque phenotypic switching; required to establish and maintain the opaque state; opaque-specific, nuclear; regulates its own expression; suggested role in regulation of adhesion factors	0	0	NE
Plate 12	D02	2116	orf19.3810		C4_04720W_A	Ortholog(s) have methylenetetrahydrofolate dehydrogenase (NAD+) activity, role in folic acid-containing compound biosynthetic process, one-carbon metabolic process, purine nucleobase biosynthetic process and cytosol, nucleus localization	0	0	NE
Plate 12	D03	2252	orf19.7412	MUB1	C3_06210C_A	Predicted protein required for ubiquitination; role in meiosis, regulation of cell budding in S. cereviae; Spider biofilm induced	0	0	NE
Plate 12	D04	3422	orf19.2581		CR_01810C_A	Protein with a predicted epimerase/dehydratase domain; Hap43-repressed gene	0	0	NE
Plate 12	D05	2555	orf19.5665		C4_00380W_A	Ortholog(s) have D-arabinose 1-dehydrogenase [NAD(P)+] activity and role in dehydro-D-arabinono-1,4-lactone biosynthetic process	0.5	0	NE
Plate 12	D06	2455	orf19.1366		C2_09850C_A	Has domain(s) with predicted oxidoreductase activity, acting on paired donors, with incorporation or reduction of molecular oxygen, 2-oxoglutarate as one donor, and incorporation of one atom each of oxygen into both donors activity	0	0	NE
Plate 12	D07	3410	orf19.3763		C1_12530C_A	Ortholog of Candida tenuis NRRL Y-1498 : CANTEDRAFT_112512, Debaryomyces hansenii CBS767 : DEHA2E16808g, Candida dubliniensis CD36 : CD36_11710 and Pichia stipitis Pignal : PICST_53617	0	0	NE
Plate 12	D08	3464	orf19.6995	ATO6	C3_05600W_A	Putative fungal-specific transmembrane protein	0	0	NE
Plate 12	D09	3427	orf19.2137		C6_04510C_A	Ortholog(s) have mitochondrion localization	0	0	NE
Plate 12	D10	2205	orf19.942	KRE62	C5_00470C_A	Putative subunit of glucan synthase; macrophage-induced gene; Bcr1-regulated in a/a RPMI biofilms	0	0	NE
Plate 12	D11	2097	orf19.4846		C1_09810W_A	GlcNAc-induced protein	0	0	NE
Plate 12	D12	3390	orf19.3938		C5_04530W_A	Putative mitochondrial ribosomal protein of the small subunit; mutation confers hypersensitivity to 5-fluorocytosine (5-FC), 5-fluorouracil (5-FU), and tubercidin (7-deazaadenosine)	0	1.5	GD
Plate 12	E01	2114	orf19.2065		C2_00630C_A	Ortholog(s) have role in allantoin catabolic process and cytosol, nucleus localization	0	0	NE
Plate 12	E02	3378	orf19.1805	PEX14	CR_04930W_A	Ortholog(s) have protein binding, bridging activity, role in protein import into peroxisome matrix, docking and peroxisomal membrane localization	0	0	NE
Plate 12	E03	3397	orf19.4524	ZCF24	C1_02010C_A	Predicted Zn(II)2Cys6 transcription factor; caspofungin induced; Hap43-repressed	0	0	NE
Plate 12	E04	3385	orf19.2666	MSN5	C4_03280W_A	Predicted karyopherin involved in nuclear import and export of proteins; flow model biofilm induced; Spider biofilm induced	0	0	NE
Plate 12	E05	3414	orf19.1793		C4_05350W_A	Ortholog(s) have phosphatidylinositol binding activity, role in cellular response to nitrogen starvation, piecemeal microautophagy of nucleus and Golgi apparatus, endosome, extrinsic to membrane, fungal-type vacuole localization	0	0	NE
Plate 12	E06	1856	orf19.1375	LEU42	C2_09750W_A	Putative alpha-isopropylmalate synthase; fungal-specific; induced by human blood or polymorphonuclear cells; regulated by Gcn2 and Gcn4; stationary phase enriched protein; Spider biofilm induced	0	0	NE
Plate 12	E07	1865	orf19.4898		C1_10280C_A	Putative protein of unknown function; induced by prostaglandins	0	0	NE
Plate 12	E08	1912	orf19.2115		C2_00170C_A	Putative molybdopterin-converting factor; fungal-specific (no human or murine homolog)	0	0	NE
Plate 12	E09	1889	orf19.2810	AAP1	C3_03990C_A	Putative amino acid permease; fungal-specific; possibly essential, disruptants not obtained by UAU1 method; Spider biofilm induced	0	0	NE
Plate 12	E10	1866	orf19.2214		C2_07680W_A	Ortholog(s) have structural constituent of ribosome activity and mitochondrial large ribosomal subunit localization	0	3	E
Plate 12	E11	3249	orf19.6068	SVF1	C1_00400W_A	Putative survival factor; stationary phase enriched protein; fluconazole-induced; regulated by Gcn4p; repressed in response to amino acid starvation (3-AT treatment); fungal-specific (no human or murine homolog)	0	0	NE
Plate 12	E12	2696	orf19.1523	FMO1	C2_02060C_A	Putative oxidoreductase; mutation confers hypersensitivity to toxic ergosterol analog, and to amphotericin B	0	0	NE
Plate 12	F01	3277	orf19.4614		C4_01790W_A	Adapter protein for pexophagy and the cytoplasm-to-vacuole targeting (Cvt) pathway; Spider biofilm induced	0	0	NE
Plate 12	F02	2689	orf19.2241	PST1	C2_06870C_A	Putative 1,4-benzoquinone reductase; hyphal-induced; regulated by Cyr1, Ras1, Efg1, Nrg1, Rfg1, Tup1; Hap43-induced; Spider biofilm induced	0	0	NE
Plate 12	F03	2670	orf19.153	TPO5	C2_04690C_A	Putative polyamine transporter; mutation confers hypersensitivity to toxic ergosterol analog; hyphal induced; macrophage induced	0	0	NE
Plate 12	F04	2676	orf19.1442	PLB4.5	C2_01380W_A	Phospholipase B; Hog1-induced; regulated by Ssn6; putative GPI-anchor; repressed during cell wall regeneration; clade-associated gene expression; Hap43-induced; rat catheter and Spider biofilm repressed	0	0	NE
Plate 12	F05	3476	orf19.3247		CR_01080W_A	Putative ortholog of S. cerevisiae Laa1p; likely to be essential for growth, based on an insertional mutagenesis strategy	0	0	NE
Plate 12	F06	2663	orf19.318		C3_03190C_A	Ortholog(s) have role in iron-sulfur cluster assembly and mitochondrial matrix localization	0	1.25	GD
Plate 12	F07	3468	orf19.3051		C1_03490W_A	Protein of unknown function; S. pombe ortholog SPAC17A2.02c plays a role in resistance to cadmium; colony morphology-related gene regulation by Ssn6; Spider biofilm repressed	0	0	NE
Plate 12	F08	2660	orf19.2458		C1_05910W_A	Protein of unknown function; flow model, rat catheter and Spider biofilm induced	0	0	NE
Plate 12	F09	3263	orf19.3023	NGG1	C1_03290W_A	Ortholog(s) have histone acetyltransferase activity and role in histone acetylation, regulation of transcription from RNA polymerase II promoter	0	0	NE
Plate 12	F10	3455	orf19.4003	TIP20	C5_05110C_A	Protein interacting with Sec20p, possibly involved in retrograde transport between the Golgi and the endoplasmic reticulum; similar to S. cerevisiae Tip20p	0	4	E
Plate 12	F11	2677	orf19.3923	PGA37	C5_04370C_A	Putative GPI-anchored protein; Hap43-repressed; Spider biofilm induced	0	0	NE
Plate 12	F12	3420	orf19.5498	EFH1	C2_06340W_A	APSES transcription factor; homodimer; minor role in transcriptional regulation vs Efg1; regulates filamentous growth, phenotypic switch; EFG1 and EFH1 genetically interact; expression interferes with mouse intestinal tract colonization	0	0	NE
Plate 12	G01	2702	orf19.1991		C2_01340W_A	Ortholog(s) have cytoplasm localization	0	0	NE
Plate 12	G02	3393	orf19.805		C2_04160W_A	Putative protein of unknown function; possibly mitochondrial; Hap43-repressed; Spider biofilm repressed	0	0	NE
Plate 12	G03	3424	orf19.4520		C2_04340C_A	Putative gluconokinase; rat catheter biofilm induced	0	0	NE
Plate 12	G04	3454	orf19.4850		C1_09850C_A	Ortholog(s) have cytosol, nucleus localization	0	0	NE
Plate 12	G05	3413	orf19.2217		C2_07650C_A	Has domain(s) with predicted peptidase activity and role in proteolysis	0	0	NE
Plate 12	G06	3432	orf19.6348		C1_12740W_A	Predicted cysteine proteinase domain; mutants are viable	0	0	NE
Plate 12	G07	3451	orf19.3302		C1_01140C_A	Putative type-1 protein phosphatase targeting subunit; transcript repressed by yeast-hyphal switch; transcript induced by Mnl1p under weak acid stress; flow model biofilm induced	0	0	NE
Plate 12	G08	3449	orf19.511		CR_04230W_A	Ortholog(s) have ribosylnicotinamide kinase activity, role in NAD biosynthesis via nicotinamide riboside salvage pathway, nicotinamide riboside metabolic process and cytosol, nucleus localization	0	0	NE
Plate 12	G09	3470	orf19.7033		C7_00840C_A	Putative dual specificity protein phosphatase, similar to S. cerevisiae Pps1p	0	0	NE
Plate 12	G10	3438	orf19.3669	SHA3	C1_02120C_A	Putative ser/thr kinase involved in glucose transport; Tn mutation affects filamentous growth; fluconazole-induced; ketoconazole-repressed; induced in by alpha pheromone in SpiderM; possibly essential; flow model biofilm induced	0	0	NE
Plate 12	G11	3480	orf19.6744		C3_07450C_A	Ortholog(s) have role in regulation of mitotic metaphase/anaphase transition and cytosol, nucleus localization	0	0	NE
Plate 12	G12	3442	orf19.6705		C7_03480W_A	Putative guanyl nucleotide exchange factor with Sec7 domain; required for normal filamentous growth; regulated by yeast-hyphal switch; filament induced; regulated by Nrg1, Tup1, Mob2, Hap43; mRNA binds She3; Spider biofilm induced	0	0	NE
Plate 12	H01	3434	orf19.4923		C1_12930C_A	Predicted membrane transporter; sugar porter (SP) family member, major facilitator superfamily; caspofungin induced; Spider biofilm induced	0	0	NE
Plate 12	H02	1968	orf19.1585	ZRT2	C2_02590W_A	Zinc transporter; ciclopirox olamine, fluconazole, alkaline repressed; transcript induced by amphotericin B, interaction with macrophages; possibly essential (UAU1 method); induced in oralpharyngeal candidiasis; Spider biofilm induced	0	0	NE
Plate 12	H03	1794	orf19.2209	YVC1	C2_07730W_A	Putative vacuolar cation channel shock; repressed by alpha pheromone in SpiderM medium	0	0	NE
Plate 12	H04	1523	orf19.473	TPO4	CR_03920C_A	Putative sperimidine transporter; fungal-specific (no human or murine homolog); Spider biofilm induced; promoter bound by Tec1 and Ndt80; Bcr1-repressed in RPMI a/a biofilms	0	0	NE
Plate 12	H05	1961	orf19.3003		C1_03100W_A	Putative lipid-binding protein with a predicted role in calcium-dependent phospholipid-binding	0	0	NE
Plate 12	H06	1687	orf19.3950	MSM1	C5_04650C_A	Mitochondrial methionyl-tRNA synthetase (MetRS); functionally complements methionine auxotrophy of an E. coli MetRS mutant; transcript regulated by Nrg1; flow model biofilm induced	0	0	NE
Plate 12	H07	1801	orf19.2445		C1_06000W_A	Putative dicarboxylic amino acid permease; fungal-specific (no human or murine homolog); induced by alpha pheromone in SpiderM medium	0	0	NE
Plate 12	H08	1524	orf19.2350		C1_10710C_A	Protein similar to S. cerevisiae Yor378w; MFS family transporter; transposon mutation affects filamentous growth; null mutants are viable; fungal-specific (no human or murine homolog)	0	0	NE
Plate 12	H09	1839	orf19.5815	SCT2	C2_02890W_A	Putative glycerol-3-phosphate acyltransferase; fungal-specific (no human or murine homolog)	0	0	NE
Plate 12	H10	71	orf19.3083		C4_07200C_A	Putative lipid phosphatase of the endoplasmic reticulum; role in DNA repair, actin cytoskeleton organization, cellular manganese ion homeostasis; Spider biofilm repressed	0	0	NE
Plate 12	H11	899	orf19.4612		C4_01800W_A	Protein with a dienelactone hydrolase domain; Hap43-repressed gene	0	0	NE
Plate 12	H12	3096	orf19.6081	PHR2	C1_00220W_A	Glycosidase; role in vaginal not systemic infection (low pH not neutral); low pH, high iron, fluconazole, Hap43-induced; Rim101-repressed at pH8; rat catheter biofilm induced; Bcr1-repressed in RPMI a/a biofilms	0	0	NE
Plate 13	A01	3114	orf19.2003	HNM1	C2_01210C_A	Putative choline/ethanolamine transporter; mutation confers hypersensitivity to toxic ergosterol analog; colony morphology-related gene regulation by Ssn6; clade-associated gene expression	0	0	NE
Plate 13	A02	3218	orf19.339	NDE1	C3_03420C_A	Putative NADH dehydrogenase; may act alternatively to complex I in respiration; caspofungin repressed; rat catheter biofilm induced; Spider biofilm repressed	0	0	NE
Plate 13	A03	2726	orf19.986	GLY1	C1_10450W_A	L-threonine aldolase; complements glycine auxotrophy of S. cerevisiae shm1 shm2 gly1-1 triple mutant; macrophage/pseudohyphal-induced; the GLY1 locus has an RFLP and is triploid in strain SGY269; flow model biofilm induced	0	0	NE
Plate 13	A04	2781	orf19.3895	CHT2	C5_04130C_A	GPI-linked chitinase; required for normal filamentous growth; repressed in core caspofungin response; fluconazole, Cyr1, Efg1, pH-regulated; mRNA binds She3 and is localized to yeast-form buds and hyphal tips; Spider biofilm repressed	0	0	NE
Plate 13	A05	3067	orf19.2908		C4_06280C_A	Predicted oxidoreductase; rat catheter biofilm induced	0	0	NE
Plate 13	A06	3444	orf19.5676		C4_00470C_A	Ortholog(s) have cytosol, nucleus localization	0	0	NE
Plate 13	A07	3471	orf19.7128	SYS1	C7_04330C_A	Putative Golgi integral membrane protein; transcript regulated by Mig1	0	0	NE
Plate 13	A08	2488	orf19.2175		C2_08100W_A	Putative mitochondrial cell death effector; induced by nitric oxide; Spider biofilm induced; rat catheter biofilm repressed	0	0	NE
Plate 13	A09	2103	orf19.3991		C5_05000C_A	Ortholog(s) have role in cellular lipid metabolic process and cytosol localization	0	0	NE
Plate 13	A10	3194	orf19.3099	TRP4	C4_07090C_A	Predicted enzyme of amino acid biosynthesis; upregulated in biofilm; regulated by Gcn2p and Gcn4p; S. cerevisiae ortholog is Gcn4p regulated	0	3.5	E
Plate 13	A11	3308	orf19.7310		CR_09140C_A	Protein with a role in directing meiotic recombination events to homologous chromatids; induced by ciclopirox olamine; positively regulated by Sfu1; Hog1, fluconazole-repressed; Hap43-induced; Spider biofilm induced	0	0	NE
Plate 13	A12	3147	orf19.5796	SHE9	C2_03050W_A	Protein with similarity to S. cerevisiae She9p, which inhibits growth when overproduced; gene has possible growth-regulation element; fungal-specific (no human or murine homolog)	0	0	NE
Plate 13	B01	3421	orf19.2575		CR_01780W_A	Putative S-adenosylmethionine-dependent methyltransferase; Hap43p-induced gene	0	0	NE
Plate 13	B02	3481	orf19.7661	HMI1	CR_10720W_A	ATP-dependent 3' - 5' helicase involved in maintenance of mitochondrial DNA; ortholog of S. cerevisiae Hmi1p	0	0	NE
Plate 13	B03	3437	orf19.3441	FRP6	C6_01430C_A	Putative ammonia transport protein; regulated by Nrg1 and Tup1; regulated by Ssn6; induced by human neutrophils	0	0	NE
Plate 13	B04	3433	orf19.989		C1_10470W_A	Mitochondrial ribosomal protein of the small subunit; Spider biofilm repressed	0	0	NE
Plate 13	B05	3141	orf19.673		C1_11290W_A	Has domain(s) with predicted FMN binding, oxidoreductase activity and role in oxidation-reduction process	0	0	NE
Plate 13	B06	3192	orf19.3111	PRA1	C4_06980W_A	Cell surface protein that sequesters zinc from host tissue; enriched at hyphal tips; released extracellularly; binds to host complement regulators; mediates leukocyte adhesion and migration; immunogenic in mouse; produced at ambient pH	0	0	NE
Plate 13	B07	3337	orf19.6809		C3_06920W_A	Putative phosphomutase-like protein; protein present in exponential and stationary growth phase yeast; Hap43-repressed; Spider biofilm repressed	0	0	NE
Plate 13	B08	3379	orf19.5757		C6_03820C_A	Ortholog(s) have cytoplasm, nucleus localization	0	0	NE
Plate 13	B09	2461	orf19.4678		C4_01120C_A	Predicted triglyceride lipase; Spider biofilm induced	0	0	NE
Plate 13	B10	3332	orf19.5459		C3_00130C_A	mRNA polyadenylation regulating protein; Hap43-repressed; transcript is upregulated in RHE model of oral candidiasis and in clinical isolates from HIV+ patients with oral candidiasis; Spider biofilm repressed	0	0	NE
Plate 13	B11	1605	orf19.5755		C6_03810W_A	Ortholog(s) have cyclin-dependent protein kinase regulator activity	0	0	NE
Plate 13	B12	1642	orf19.2446		C1_05990C_A	Ortholog(s) have cell division site, cell tip, cytoplasm, nucleus localization	0	0	NE
Plate 13	C01	1747	orf19.1220	RVS167	C6_04040C_A	SH3-domain- and BAR domain-containing protein involved in endocytosis; null mutant exhibits defects in hyphal growth, virulence, cell wall integrity, and actin patch localization; cosediments with phosphorylated Myo5p	0	0	NE
Plate 13	C02	1811	orf19.689	PLB1	C6_01990W_A	Phospholipase B; host cell penetration and virulence in mouse systemic infection; Hog1-induced; signal sequence, N-glycosylation, and Tyr phosphorylation site; induced in fluconazole-resistant strains; rat catheter biofilm repressed	0	0	NE
Plate 13	C03	2082	orf19.341		C3_03440C_A	Putative spermidine export pump; fungal-specific (no human or murine homolog)	0	0	NE
Plate 13	C04	2144	orf19.6993	GAP2	C3_05580C_A	General amino acid permease; ketoconazole, flucytosine repressed; Ssy1-dependent histidine induction; regulated by Nrg1, Tup1; colony morphology-related gene regulation by Ssn6; Spider and flow model biofilm induced	0	0	NE
Plate 13	C05	2758	orf19.1388		C2_09660W_A	Putative 66S pre-ribosomal particle component; Hap43-induced; F-12/CO2 early biofilm induced	0	0	NE
Plate 13	C06	2710	orf19.166	ASG1	CR_02560C_A	Gal4p family zinc-finger transcription factor with similarity to S. cerevisiae Asg1p	0	0	NE
Plate 13	C07	2738	orf19.681	HAP43	C1_11210C_A	CCAAT-binding factor-dependent transcription factor; repressor; also called CAP2; required for low iron response; similar to bZIP transcription factor AP-1; repressed by Sfu1; ciclopirox olamine induced; rat catheter, Spider biofilm induced	0	0	NE
Plate 13	C08	2779	orf19.3355	ISN1	C1_01650W_A	Putative inosine 5'-monophosphate 5'-nucleotidase; fungal-specific (no human or murine homolog)	0	0	NE
Plate 13	C09	2773	orf19.2284		C2_07270W_A	Protein with an FMN-binding domain; Hap43-repressed; flow model biofilm induced	0	0	NE
Plate 13	C10	2772	orf19.3348		C1_01580W_A	Ortholog(s) have structural constituent of ribosome activity and mitochondrial large ribosomal subunit localization	0	3.5	E
Plate 13	C11	1900	orf19.2574		CR_01770C_A	Ortholog(s) have Golgi apparatus localization	0	0	NE
Plate 13	C12	1625	orf19.4699		C4_00950C_A	Putative phospholipase of patatin family; similar to S. cerevisiae Tgl3p; predicted Kex2p substrate	0	0	NE
Plate 13	D01	1660	orf19.2016		C2_01090C_A	Ortholog(s) have protein binding, bridging activity, role in ergosterol biosynthetic process and endoplasmic reticulum membrane localization	0	0	NE
Plate 13	D02	1692	orf19.3607		C2_08690C_A	Ortholog of C. parapsilosis CDC317 : CPAR2_806540, Candida tenuis NRRL Y-1498 : CANTEDRAFT_108823, Debaryomyces hansenii CBS767 : DEHA2B13596g and Candida dubliniensis CD36 : CD36_22860	0	0	NE
Plate 13	D03	1746	orf19.3795	AGP3	C4_04840C_A	Putative serine transporter; possible role in assimilation of sulfur; F-12/CO2 early biofilm induced	0	0	NE
Plate 13	D04	1093	orf19.5535		C6_02650C_A	Predicted membrane transporter, member of the anion:cation symporter (ACS) family, major facilitator superfamily (MFS)	0	0	NE
Plate 13	D05	2549	orf19.6719		C3_07680W_A	Putative nucleosome assembly protein; homozygous transposon insertion causes decreased colony wrinkling under filamentous growth-inducing conditions, but does not block true hyphal formation in liquid media	0	0	NE
Plate 13	D06	2541	orf19.541		CR_04500C_A	Has domain(s) with predicted oxidoreductase activity, acting on paired donors, with incorporation or reduction of molecular oxygen, 2-oxoglutarate as one donor, and incorporation of one atom each of oxygen into both donors activity	0	0	NE
Plate 13	D07	2634	orf19.7403		C3_06290W_A	Ortholog of S. cerevisiae : YML020W, C. glabrata CBS138 : CAGL0G07062g, C. parapsilosis CDC317 : CPAR2_404740 and Candida tenuis NRRL Y-1498 : CANTEDRAFT_107670	0	0	NE
Plate 13	D08	2168	orf19.5026		C1_13880C_A	C2H2 transcription factor; Spider biofilm induced	0	0	NE
Plate 13	D09	2393	orf19.5292	AXL2	C4_04170C_A	Ortholog of S. cerevisiae Axl2; a plasma membrane protein involved in determination of budding pattern; O-glycosylated by Pmt4; mutant is viable	0	0	NE
Plate 13	D10	2644	orf19.7518	ZCF38	CR_00170W_A	Putative Zn(II)2Cys6 transcription factor	0	0	NE
Plate 13	D11	2629	orf19.7364		C3_05840W_A	Has domain(s) with predicted N,N-dimethylaniline monooxygenase activity, NADP binding, flavin adenine dinucleotide binding activity and role in oxidation-reduction process	0	0	NE
Plate 13	D12	2490	orf19.5839	PDR17	C2_02680W_A	Fungal-specific protein (no human or murine homolog); role in sensitivity to fluconazole, specifically	0	0	NE
Plate 13	E01	2241	orf19.7370		C3_05900W_A	Possible G-protein coupled receptor; vacuolar membrane transporter for cationic amino acids; PQ-loop motif; rat catheter and Spider biofilm induced	0	0	NE
Plate 13	E02	2413	orf19.4471		C1_03960C_A	Ortholog(s) have role in protein targeting to vacuole, re-entry into mitotic cell cycle after pheromone arrest and endoplasmic reticulum membrane localization	0	0	NE
Plate 13	E03	2655	orf19.5970		C3_05010C_A	Putative DNA repair helicase; transcriptionally induced by interaction with macrophage; fungal-specific (no human or murine homolog)	0	0	NE
Plate 13	E04	2069	orf19.1445	ESC4	C2_01400C_A	Protein similar to S. cerevisiae Esc4; a protein that represses transposition; transposon mutation affects filamentation; rat catheter biofilm repressed	0	0	NE
Plate 13	E05	2631	orf19.7377	ASE1	C3_05960W_A	Putative microtubule-associated protein; member of conserved Mcm1p regulon; periodic mRNA expression, peak at cell-cycle G2/M phase	0.5	0	NE
Plate 13	E06	2046	orf19.2045		C2_00790C_A	Ortholog(s) have diacylglycerol kinase activity, role in phosphatidic acid biosynthetic process and integral to endoplasmic reticulum membrane localization	0	0	NE
Plate 13	E07	2597	orf19.6444		CR_08680C_A	Ortholog(s) have role in cellular response to amino acid starvation, meiosis, regulation of TOR signaling cascade and Seh1-associated complex, cytosol, extrinsic to fungal-type vacuolar membrane localization	0	0	NE
Plate 13	E08	2492	orf19.5837		C2_02700C_A	Ortholog(s) have 4-amino-4-deoxychorismate lyase activity, role in folic acid biosynthetic process and cytoplasm localization	0	0	NE
Plate 13	E09	2072	orf19.6882	OSM1	C2_05700W_A	Putative flavoprotein subunit of fumarate reductase; soluble protein in hyphae; caspofungin repressed; stationary phase enriched protein; flow model biofilm induced; Spider biofilm repressed	0	0	NE
Plate 13	E10	2576	orf19.6899		C7_01170C_A	Putative oxidoreductase; mutation confers hypersensitivity to toxic ergosterol analog; rat catheter and Spider biofilm induced	0	0	NE
Plate 13	E11	1710	orf19.644	HGT9	CR_05090C_A	Putative glucose transporter of the major facilitator superfamily; the C. albicans glucose transporter family comprises 20 members; 12 probable membrane-spanning segments; induced at low (0.2%, compared to 2%) glucose in rich media; intron	0	0	NE
Plate 13	E12	2351	orf19.3759		C1_12570C_A	Putative elongator complex subunit; for modification of wobble nucleosides in tRNA; Spider biofilm induced	0	0	NE
Plate 13	F01	2419	orf19.2875		C4_06590W_A	Ortholog of S. pombe SPAC1071.09c DNAJ domain protein; Hap43-induced gene	0	0	NE
Plate 13	F02	2341	orf19.3150	GRE2	C2_06720W_A	Putative reductase; Nrg1 and Tup1-regulated; benomyl- and hyphal-induced; macrophage/pseudohyphal-repressed; repressed by low iron; possibly involved in osmotic stress response; stationary phase enriched protein; Spider biofilm induced	0	0	NE
Plate 13	F03	2469	orf19.2983	CDC73	C1_02920W_A	Putative transcription elongation factor; cdc73 kap114 double transposon mutation affects filamentous growth; Spider biofilm repressed	0	0	NE
Plate 13	F04	2666	orf19.4396		CR_03530W_A	Mitochondrial inner membrane protein; mammalian mitofilin domain; Spider biofilm repressed	0	0	NE
Plate 13	F05	2642	orf19.7495		CR_00380W_A	Protein with NADPH oxidoreductase containing flavin mononucleotide (FMN) domain; induced by nitric oxide	0	0	NE
Plate 13	F06	2637	orf19.7437		C3_06490W_A	Putative protein of unknown function; Hap43p-repressed gene; ortholog of S. cerevisiae YJL218W	0	0	NE
Plate 13	F07	2161	orf19.4617		C4_01760W_A	Predicted peptide alpha-N-acetyltransferase; flow model biofilm induced	0	0	NE
Plate 13	F08	2682	orf19.778	PIL1	C1_04680W_A	Eisosome component; predicted role in endocytosis; echinocandin-binding protein; localizes to cell surface of hyphae, but not yeast-form cells; biofilm induced; Hap43-induced	0	0	NE
Plate 13	F09	2115	orf19.2055	NPL6	C2_00710W_A	Putative nuclear protein localization factor; Hap43-induced; Spider biofilm repressed	0	3.5	E
Plate 13	F10	2260	orf19.5426		C3_00400C_A	Putative patatin-like phospholipase; macrophage-regulated gene; fungal-specific (no human or murine homolog)	0	0	NE
Plate 13	F11	2151	orf19.3066	ENG1	C1_03680W_A	Endo-1,3-beta-glucanase; ortholog of S. cerevisiae Dse4 required for cell separation; caspofungin, fluconazole repressed; fungal-specific; repressed by alpha pheromone in SpiderM medium; flow model biofilm induced	0	0	NE
Plate 13	F12	2755	orf19.367	CNH1	C4_00040W_A	Na+/H+ antiporter; required for wild-type growth, cell morphology, and virulence in a mouse model of systemic infection; not transcriptionally regulated by NaCl; fungal-specific (no human or murine homolog)	0	0	NE
Plate 13	G01	2100	orf19.4833	MLS1	C1_09690W_A	Malate synthase; glyoxylate cycle enzyme; no mammalian homolog; regulated upon white-opaque switch; phagocytosis, strong oxidative stress induced; stationary phase enriched; flow model biofilm repressed; rat catheter, Spider biofilm induced	0	0	NE
Plate 13	G02	2112	orf19.2072		C2_00550W_A	Ortholog(s) have choline transmembrane transporter activity, ethanolamine transmembrane transporter activity and role in choline transport, ethanolamine transport, glycine betaine transport	0	0	NE
Plate 13	G03	2793	orf19.1980	GIT4	C5_00870C_A	Putative glycerophosphoinositol permease; fungal-specific (no human or murine homolog); possibly an essential gene, disruptants not obtained by UAU1 method; Hap43p-repressed gene	0	0	NE
Plate 13	G04	2794	orf19.1979	GIT3	C5_00880C_A	Putative glycerophosphoinositol permease; white cell specific transcript; fungal-specific; alkaline repressed; caspofungin, macrophage/pseudohyphal-repressed; flow model biofilm induced; Spider biofilm induced	0	0	NE
Plate 13	G05	2712	orf19.4781	GRP1	C1_09230C_A	Protein similar to dihydroflavonol-4-reductases	0	0	NE
Plate 13	G06	2727	orf19.988		C1_10460W_A	Protein of unknown function; oral infection upregulated gene; upregulated in strains from HIV+ patients with oral candidiasis; mutants have reduced ability to damage oral epithelial cells; transcript possibly regulated upon hyphal formation	0	0	NE
Plate 13	G07	2728	orf19.3149	LSP1	C2_06730W_A	Eisosome component with a predicted role in endocytosis; protein present in exponential and stationary growth phase yeast cultures; caspofungin repressed; biofilm induced; fungal-specific (no human/murine homolog); sumoylation target	0	0	NE
Plate 13	G08	2761	orf19.2019		C2_01030W_A	Ortholog(s) have structural constituent of ribosome activity and mitochondrial large ribosomal subunit localization	0	2.25	E
Plate 13	G09	2780	orf19.3352		C1_01620C_A	Has domain(s) with predicted nucleotide binding, oxidoreductase activity and role in oxidation-reduction process	0	0	NE
Plate 13	G10	2432	orf19.2113		C2_00190C_A	Putative integral peroxisomal membrane protein; Hap43p-repressed gene	0	0	NE
Plate 13	G11	2377	orf19.5205		C2_05820W_A	Protein of unknown function; Hap43-repressed gene	0	0.5	GD
Plate 13	G12	2600	orf19.4584	PHO114	C4_02070W_A	Acid phosphatase; induced by Mnl1 under weak acid stress; Spider biofilm induced	0	0	NE
Plate 13	H01	2399	orf19.3926	RNY11	C5_04400W_A	Ortholog(s) have endoribonuclease activity, role in RNA catabolic process, apoptotic process, cell morphogenesis and cytosol, extracellular region, vacuole localization	0	0	NE
Plate 13	H02	2554	orf19.5663	RCH1	C4_00360C_A	Plasma membrane protein; involved in regulation of cytosolic calcium homeostasis; null mutation confers sensitivity to calcium and resistance to azoles and terbinafine; rat catheter biofilm induced	0	0	NE
Plate 13	H03	2395	orf19.3764	GSG1	C1_12520W_A	Putative subunit of the TRAPP complex; involved in targeting of ER-to-Golgi transport vesicles; flow model biofilm induced	0	0	NE
Plate 13	H04	2345	orf19.3592	JEM1	C2_08790W_A	Functional homolog of S. cerevisiae Jem1p, which acts with Scj1p and Kar2p (BiP) in protein folding and ER-associated degradation of misfolded proteins, and also has a role in karyogamy; has J domain and 4 tetratricopeptide repeats	0	0	NE
Plate 13	H05	2501	orf19.6091	RIM8	C1_00150C_A	Beta-arrestin-like protein; involved in pH response; required for pathogenesis, activation of Rim101 and alkaline pH-induced hyphal growth; colony morphology-related gene regulation by Ssn6p negative feedback regulation target	0	0	NE
Plate 13	H06	2976	orf19.4213	FET31	C6_00460C_A	Putative iron transport multicopper oxidase precursor; flucytosine induced; caspofungin repressed	0	0	NE
Plate 13	H07	2998	orf19.4805		C1_09430W_A	Putative membrane protein; induced by alpha pheromone in SpiderM medium; Hap4-induced gene; Spider biofilm induced	0	0	NE
Plate 13	H08	1736	orf19.1249		C4_05640C_A	Ortholog(s) have 1-(5-phosphoribosyl)-5-[(5-phosphoribosylamino)methylideneamino]imidazole-4-carboxamide isomerase activity, role in histidine biosynthetic process and cytosol, nucleus localization	0	2.75	E
Plate 13	H09	1824	orf19.4874	MNN23	C1_10070C_A	Alpha-1,2-mannosyltransferase; mutants hypersensitive to toxic ergosterol analog, amphotericin B, calcofluor white, growth at 42 degrees and have decreased cell wall mannan; flow model biofilm induced	0	0	NE
Plate 13	H10	2890	orf19.2930		C1_02430C_A	Predicted translation initiation factor; role in translational initiation; Spider biofilm repressed	0	0	NE
Plate 13	H11	3043	orf19.1665	MNT1	C3_01810C_A	Alpha-1,2-mannosyl transferase; predicted type II Golgi membrane protein; adds 2nd mannose during cell-wall mannoprotein biosynthesis; required for wild-type virulence and adherence to epithelial cells; Hap43-induced	0	0	NE
Plate 13	H12	1860	orf19.2352		C1_10690W_A	Ortholog(s) have mitochondrion localization	0	0	NE
Plate 14	A01	1922	orf19.5777		C2_03170W_A	Protein of unknown function; F-12/CO2 early biofilm induced	0	0	NE
Plate 14	A02	2905	orf19.3922		C5_04360C_A	Possible pyrimidine 5' nucleotidase; protein present in exponential and stationary growth phase yeast cultures; Hap43p-repressed gene	0	0	NE
Plate 14	A03	2922	orf19.3399		C6_01850W_A	Ortholog(s) have histone binding activity, role in histone exchange and Swr1 complex, cytoplasm localization	0	0	NE
Plate 14	A04	2944	orf19.1185		C6_00260W_A	Ortholog(s) have ubiquitin-protein ligase activity and role in establishment of mitotic spindle orientation, mitotic cell cycle spindle assembly checkpoint, protein autoubiquitination, septin ring assembly	0	0	NE
Plate 14	A05	2969	orf19.2848		CR_02910W_A	Predicted regulatory subunit of the Atg1 signaling complex; required for vesicle formation during autophagy and the cytoplasm-to-vacuole targeting (Cvt) pathway; Spider biofilm induced	0	0	NE
Plate 14	A06	2679	orf19.3212	MID1	C5_03990W_A	Putative stretch-activated Ca2+ channel of the high affinity calcium uptake system; role in thigmotropism; decreased transcription is observed upon fluphenazine treatment or in an azole-resistant strain with CDR1 and CDR2 overexpression	0	0	NE
Plate 14	A07	2182	orf19.7176	NPT1	C7_04040C_A	Putative nicotinate phosphoribosyltransferase, involved in NAD salvage pathway; fungal-specific (no human or murine homolog)	1.5	1	GD
Plate 14	A08	2198	orf19.7243		C1_14310W_A	Deoxycytidine monophosphate (dCMP) deaminase; role in dUMP and dTMP biosynthesis; Spider biofilm repressed	0	0	NE
Plate 14	A09	2671	orf19.151	TPO5	C2_04690C_A	Putative polyamine transporter; mutation confers hypersensitivity to toxic ergosterol analog; hyphal induced; macrophage induced	0	0	NE
Plate 14	A10	2788	orf19.4573	ZCF26	C4_02180C_A	Zn2-Cys6 transcription factor of unknown function; induced by alpha pheromone in SpiderM medium	0	0	NE
Plate 14	A11	2809	orf19.3365	DAO2	C4_03380C_A	Putative D-amino acid oxidase; rat catheter biofilm induced	0	0	NE
Plate 14	A12	2824	orf19.3449		C6_01350W_A	Ortholog(s) have cytoplasm, ribosome localization	0	0	NE
Plate 14	B01	2883	orf19.2396	IFR2	CR_03280W_A	Zinc-binding dehydrogenase; induced by benomyl, ciclopirox olamine or alpha pheromone; regulated by oxidative stress via Cap1 and osmotic stress via Hog1; protein present in exponential and stationary phase; Hap43-induced	0	0	NE
Plate 14	B02	2884	orf19.2394		CR_03300C_A	Ortholog(s) have cytoplasm, nucleus localization	0	0	NE
Plate 14	B03	1926	orf19.4788	ARG5,6	C1_09290C_A	Arginine biosynthetic enzyme; processed in S. cerevisiae into 2 polypeptides with acetylglutamate kinase (Arg6) activity and acetylglutamate-phosphate reductase (Arg5) activity; Gcn4 regulated; alkaline repressed; Spider biofilm induced	0	1.25	GD
Plate 14	B04	1671	orf19.1800		C4_05440C_A	Protein of unknown function; Spider biofilm induced	0	0	NE
Plate 14	B05	502	orf19.2573	FRS1	CR_01760C_A	Phenylalanyl-tRNA synthetase; possible role in early cell wall biosynthesis; downregulated by phagocytosis by macrophages; possibly essential gene, disruptants not obtained by UAU1 method; protein present in exponential and stationary phase	0	4	E
Plate 14	B06	506	orf19.329		C3_03300C_A	Putative pre-mRNA branch point binding protein; role in mRNA splicing via spliceosome; Spider biofilm repressed	0	4	E
Plate 14	B07	507	orf19.332		C3_03330C_A	Member of a complex that contains Prp19; stabilizes U6 snRNA in catalytic forms of the spliceosome containing U2, U5, and U6 snRNAs; Spider biofilm induced	0	4	E
Plate 14	B08	508	orf19.5106	DIP2	C1_08290C_A	Putative small ribonucleoprotein complex; Tn mutation affects filamentous growth; physically interacts with TAP-tagged Nop1; heterozygous null mutant exhibits resistance to parnafungin; Hap43-induced gene; Spider biofilm induced	0	4	E
Plate 14	B09	509	orf19.4146	SMD3	C5_01510W_A	Putative core snRNP protein; induced upon adherence to polystyrene	0	4	E
Plate 14	B10	510	orf19.1064	ACS2	C1_04290C_A	Acetyl-CoA synthetase; antigenic during human and murine infection; induced by Efg1; macrophage-induced protein; soluble protein in hyphae; gene contains intron; Spider biofilm repressed	0	1	GD
Plate 14	B11	511	orf19.3026	MAS1	C1_03300C_A	Putative mitochondrial processing protease; Hap43-repressed; transcript regulated by Nrg1; oxidative stress-induced via Cap1	0	4	E
Plate 14	B12	512	orf19.1833		C1_10620W_A	Ortholog(s) have pseudouridine synthase activity, role in box H/ACA snoRNA 3'-end processing, rRNA pseudouridine synthesis, snRNA pseudouridine synthesis and 90S preribosome, box H/ACA snoRNP complex, cytosol localization	0	4	E
Plate 14	C01	516	orf19.316	SEC13	C3_03170W_A	Putative protein transport factor; antigenic during murine systemic infection; macrophage-downregulated protein; protein level decreases in stationary phase cultures; Spider biofilm repressed	0	0.75	GD
Plate 14	C02	518	orf19.717	HSP60	CR_06490C_A	Heat shock protein; soluble in hyphae; regulated by Nrg1 and by iron; induced in high iron; heavy metal (cadmium) stress-induced; sumoylation target; protein present in exponential and stationary phase cells; Hap43-repressed	0	4	E
Plate 14	C03	519	orf19.3393		C6_01890C_A	Putative DEAD-box helicase; Hap43-induced; Spider biofilm induced	0	3.5	E
Plate 14	C04	520	orf19.5486		C2_06230W_A	Putative endoribonuclease; heterozygous null mutant exhibits hypersensitivity to parnafungin and cordycepin in the C. albicans fitness test	0	4	E
Plate 14	C05	521	orf19.825	GCD7	C2_03990W_A	Putative translation initiator; downregulated in the presence of human whole blood or polymorphonuclear (PMN) cells	0	4	E
Plate 14	C06	522	orf19.5493	GSP1	C2_06310C_A	Small RAN G-protein; essential; no prenylation predicted; can rescue S. cerevisiae gsp1 viability; macrophage/pseudohyphal-induced; transcript not regulated by white-opaque, yeast-hypha switching; GlcNAc-induced; Spider biofilm repressed	0	4	E
Plate 14	C07	425	orf19.2863.1	ERV1	CR_03010C_A	Predicted component of the mitochondrial intermembrane space (IMS), involved in protein import into mitochondrial intermembrane space	0	0	NE
Plate 14	C08	432	orf19.7483	CRM1	CR_00520C_A	Functional homolog of S. cerevisiae Crm1, which acts in protein nuclear export; predicted to be resistant to antifungal drug leptomycin B; partially suppresses signal transduction defects of S. cerevisiae ste20 mutant	0	4	E
Plate 14	C09	422	orf19.7454	TAF60	C3_06650C_A	Putative TFIID and SAGA complex subunit; mutation confers hypersensitivity to amphotericin B	0	4	E
Plate 14	C10	418	orf19.4538		C1_01850C_A	Ortholog(s) have mRNA binding, protein heterodimerization activity, role in mRNA cleavage, mRNA polyadenylation and mRNA cleavage factor complex localization	0	4	E
Plate 14	C11	426	orf19.4631	ERG251	C4_01530C_A	C-4 sterol methyl oxidase; role in ergosterol biosynthesis; Hap43-induced; ketoconazole-induced; amphotericin B, caspofungin repressed; possibly essential gene, disruptants not obtained by UAU1 method; Spider biofilm repressed	0	0	NE
Plate 14	C12	380	orf19.2917		C4_06210C_A	Putative GTPase; heterozygous null mutant exhibits resistance to parnafungin in the C. albicans fitness test; Hap43p-induced gene	0	4	E
Plate 14	D01	391	orf19.837	GNA1	C2_03870W_A	Glucosamine-6-phosphate acetyltransferase; enzyme of UDP-GlcNAc biosynthesis; required for viability in absence of GlcNAc supplementation; required for persistent infection and wild-type virulence in mouse systemic infection	0	4	E
Plate 14	D02	379	orf19.1390	PMI1	C2_09640W_A	Phosphomannose isomerase; cell wall biosynthesis enzyme; drug target; functional homolog of S. cerevisiae, E. coli phosphomannose isomerase; Gcn4-regulated; induced on adherence to polystyrene, phagocytosis; 3-AT, Spider biofilm repressed	0	0	NE
Plate 14	D03	383	orf19.2183	KRE30	C2_08000C_A	YEF3-subfamily ABC family protein; predicted not to be a transporter; repressed in core stress response; mutation confers hypersensitivity to amphotericin B	0	2.75	GD
Plate 14	D04	435	orf19.6375	RPS20	CR_08150W_A	Putative ribosomal protein; repressed upon phagocytosis by murine macrophage; transcript positively regulated by Tbf1; Spider biofilm repressed	0	4	E
Plate 14	D05	417	orf19.1478	STT3	C2_01670C_A	Putative oligosaccharyltransferase complex component	0	4	E
Plate 14	D06	1592	orf19.4262		C5_02500C_A	Ortholog(s) have mRNA binding activity and role in cellular protein complex localization, establishment of mitochondrion localization, nuclear-transcribed mRNA catabolic process, deadenylation-dependent decay	0	0	NE
Plate 14	D07	2479	orf19.6459	DPP3	C7_02500C_A	Protein similar to S. cerevisiae pyrophosphate phosphatase Dpp1; required for farnesol biosynthesis; repressed by 17-beta-estradiol, ethynyl estradiol; Spider biofilm induced	0	0	NE
Plate 14	D08	2487	orf19.2182	BLM3	C2_08010W_A	Putative proteasome activator; binds core proteasome and stimulates proteasome-mediated protein degradation by inducing gate opening; ortholog of S. cerevisiae Blm10; transcript regulated by Nrg1 and Mig1	0	0	NE
Plate 14	D09	2464	orf19.2302		C1_11140W_A	Ortholog(s) have enzyme regulator activity, role in cellular calcium ion homeostasis and integral to endoplasmic reticulum membrane localization	0	0	NE
Plate 14	D10	2462	orf19.2695	UBR1	C4_02970C_A	Protein similar to S. cerevisiae Ubr1p ubiquitin-protein ligase; transposon mutation affects filamentous growth; Spider biofilm induced	0	0	NE
Plate 14	D11	2440	orf19.2991	HOL1	C1_03000W_A	Putative MFS transporter; regulated by Nrg1; macrophage/pseudohyphal-repressed; induced by alpha pheromone in SpiderM medium; possibly an essential gene, disruptants not obtained by UAU1 method	0	0	NE
Plate 14	D12	2428	orf19.3546	PEX2	C2_05150W_A	Ortholog(s) have ubiquitin-protein ligase activity, role in protein import into peroxisome matrix and peroxisomal membrane localization	0	0	NE
Plate 14	E01	2430	orf19.4655	OPT6	C4_01320C_A	Putative oligopeptide transporter; fungal-specific (no human or murine homolog); expression of OPT6, OPT7, or OPT8 does not suppress defect of mutant lacking Opt1p, Opt2p, and Opt3p; alleles are nonidentical	0	0	NE
Plate 14	E02	2453	orf19.6551		C7_01740C_A	Ortholog(s) have SNAP receptor activity, role in Golgi vesicle transport, vesicle fusion and Golgi medial cisterna, SNARE complex localization	0	0	NE
Plate 14	E03	1593	orf19.2242	PRB1	C2_06880C_A	Endoprotease B; regulated by heat, carbon source (GlcNAc-induced), nitrogen, macrophage response, human neutrophils; similar to (does not replace) S. cerevisiae vacuolar B protease Prb1p; flow model biofilm induced; Spider biofilm induced	0	0	NE
Plate 14	E04	2160	orf19.4608	PDC12	C4_01850C_A	Putative pyruvate decarboxylase; fungal-specific (no human or murine homolog)	0	0	NE
Plate 14	E05	2559	orf19.3124		C4_06850C_A	Ortholog(s) have mRNA binding, metalloaminopeptidase activity, role in negative regulation of gene expression, protein initiator methionine removal involved in protein maturation and cytosolic ribosome, nucleolus localization	0	0.5	GD
Plate 14	E06	2683	orf19.1291	ABZ1	C4_05290W_A	Ortholog(s) have 4-amino-4-deoxychorismate synthase activity, role in para-aminobenzoic acid biosynthetic process and cytosol, nucleus localization	0	0	NE
Plate 14	E07	2706	orf19.2292	OPT4	CR_02490W_A	Oligopeptide transporter; detected at germ tube plasma membrane; transcript inducede during phagocytosis by macrophages; fungal-specific; Hap43-repressed; merged with orf19.2292 in Assembly 20; rat catheter and Spider biofilm induced	0	0	NE
Plate 14	E08	2697	orf19.333	FCY2	C3_03360W_A	Purine-cytosine permease of pyrimidine salvage; mutation associated with resistance to flucytosine in clinical isolates; transposon mutation affects filamentation; farnesol-upregulated in biofilm	0	0	NE
Plate 14	E09	2312	orf19.5932		C3_04720C_A	Protein of unknown function; Spider biofilm induced	0	0	NE
Plate 14	E10	2170	orf19.5023	DAL7	C1_13850C_A	Putative allantoate permease; mutant is viable	0	0	NE
Plate 14	E11	2176	orf19.4985	GUP1	C1_13540W_A	Putative O-acyltransferase with a role in glycerol uptake; functionally complements growth of S. cerevisiae gup1 mutant under salt stress; required for normal ergosterol distribution, hyphal growth, biofilm formation	0	0	NE
Plate 14	E12	2206	orf19.943	FET33	C5_00460C_A	Putative multicopper ferro-O2-oxidoreductase; repressed in core caspofungin response; fails to complement S. cerevisiae fet3 iron-related phenotypes; rat catheter and Spider biofilm induced	0	0	NE
Plate 14	F01	2287	orf19.7551	ALO1	CR_09790W_A	D-Arabinono-1,4-lactone oxidase involved in biosynthesis of dehydro-D-arabinono-1,4-lactone, which has a protective role against oxidative damage; plasma membrane-localized;required for full virulence in a mouse model of systemic infection	0	0	NE
Plate 14	F02	2685	orf19.1357	FCY21	C2_09950W_A	High affinity, high capacity, hypoxanthine-adenine-guanine-cytosine/H+ symporter; similar to S. cerevisiae Fcy2; mutation confers resistance to 5-fluorocytosine (5-FC); flow model biofilm induced	0	0	NE
Plate 14	F03	1714	orf19.4199		C6_00590W_A	Protein involved in ER-to-Golgi transport; rat catheter and Spider biofilm induced	0	0	NE
Plate 14	F04	1761	orf19.4077	MIT1	C2_09150W_A	Mannosylinositol phosphorylceramide (MIPC) synthase catalytic subunit; sphingolipid biosynthesis; fluconazole, caspofungin induced; macrophage-repressed; Spider biofilm induced	0	0	NE
Plate 14	F05	1725	orf19.923	THR1	C5_00650C_A	Putative homoserine kinase; regulated by Tup1; amphotericin B repressed; regulated by Gcn2 and Gcn4; Spider biofilm repressed	0	4	E
Plate 14	F06	1758	orf19.4318	MIG1	C5_02940C_A	C2H2 transcription factor; repressor; regulates genes for carbon source utilization; Tup1-dependent and independent functions; hyphal, Hap43 and caspofungin repressed; Spider and flow model biofilm induced	0	0	NE
Plate 14	F07	1771	orf19.3658		C6_00710W_A	Ortholog(s) have role in protein folding in endoplasmic reticulum and Golgi apparatus, endoplasmic reticulum, mitochondrion localization	0	0	NE
Plate 14	F08	1786	orf19.1167		C1_11530C_A	Ortholog(s) have sulfonate dioxygenase activity and role in sulfur compound catabolic process	0	0	NE
Plate 14	F09	1833	orf19.2939		C1_02500W_A	Ortholog(s) have mitochondrion localization	0	0	NE
Plate 14	F10	1835	orf19.2943	DIP5	C1_02530C_A	Dicarboxylic amino acid permease; mutation confers hypersensitivity to toxic ergosterol analog; induced upon phagocytosis by macrophage; Gcn4-regulated; upregulated by Rim101 at pH 8; rat catheter and Spider biofilm induced	0	0	NE
Plate 14	F11	1822	orf19.2555	URA5	CR_01650W_A	Putative orotate phosphoribosyltransferase; protein abundance is affected by URA3 expression in the CAI-4 strain background; flucytosine induced; protein level decreased in stationary phase cultures	0	3.5	E
Plate 14	F12	1800	orf19.2444	CHS7	C1_06010W_A	Protein required for wild-type chitin synthase III activity; similar to (but not functional homolog of) S. cerevisiae Chs7p, which effects ER export of Chs3p; induced cyr1 mutant hyphae and ras1 yeast-form cells; Spider biofilm induced	0	0	NE
Plate 14	G01	1838	orf19.5818	SUR2	C2_02860W_A	Putative ceramide hydroxylase; predicted enzyme of sphingolipid biosynthesis; regulated by Tsa1, Tsa1B under H2O2 stress conditions; Spider and flow model biofilm induced	0	0	NE
Plate 14	G02	2795	orf19.1978	GIT2	C5_00890C_A	Putative glycerophosphoinositol permease; fungal-specific; repressed by alpha pheromone in SpiderM medium; Hap43-repressed; Spider biofilm induced	0	0	NE
Plate 14	G03	2797	orf19.97	CAN1	C6_00960W_A	Basic amino acid permease; complements lysine transport mutation; 10 predicted transmembrane regions, 3 predicted N-glycosylation sites; phagocytosis by macrophages induces transcript; rat catheter, Spider and flow model biofilm induced	0	0	NE
Plate 14	G04	2805	orf19.111	CAN2	C6_01060C_A	Basic amino acid permease; arginine metabolism; regulated by Nrg1/Tup1; caspofungin, flucytosine induced; colony morphology-related regulation by Ssn6; Hap43-repressed; rat catheter and Spider biofilm induced; promoter bound by Efg1	0	0	NE
Plate 14	G05	2846	orf19.1153	GAD1	C1_11660W_A	Putative glutamate decarboxylase; alkaline, macrophage-downregulated gene; amphotericin B induced; induced by Mnl1 under weak acid stress; stationary phase enriched protein	0	0	NE
Plate 14	G06	2875	orf19.2602	OPT1	CR_02020C_A	Oligopeptide transporter; transports 3-to-5-residue peptides; alleles are distinct, one has intron; suppresses S. cerevisiae ptr2-2 mutant defects; induced by BSA or peptides; Stp3p, Hog1p regulated; flow model biofilm induced	0	0	NE
Plate 14	G07	2934	orf19.309	DAL5	C3_03120C_A	Allantoate permease; nitrogen catabolite repressed, induced in absence of preferred N sources; nitrogen source regulation requires Gat1; possibly essential gene (by UAU1 method); Hap43-repressed	0	0	NE
Plate 14	G08	2947	orf19.5713	YMX6	C6_03480W_A	Putative NADH dehydrogenase; macrophage-downregulated gene; induced by nitric oxide; rat catheter biofilm induced	0	0	NE
Plate 14	G09	2837	orf19.4063	GPT1	C1_05080W_A	GABA/polyamine transporter; 9 to 11 membrane spanning segments; complements GABA uptake defect of an S. cerevisiae uga4 put4 gap1 triple mutant; complements growth of an S. cerevisiae spe1 mutant under polyamine limitation	0	0.75	GD
Plate 14	G10	3063	orf19.2170	PHM7	C2_08140C_A	Putative transporter; fungal-specific; Hog1-repressed; repressed by 17-beta-estradiol, ethynyl estradiol; Hap43-induced; Spider biofilm induced	0	0	NE
Plate 14	G11	2368	orf19.1311	SPO75	C4_03670W_A	Ortholog(s) have role in ascospore wall assembly	0	0	NE
Plate 14	G12	2373	orf19.5037	HRQ2	C4_03820C_A	Protein of unknown function; mutants are viable; rat catheter and Spider biofilm induced	0	0	NE
Plate 14	H01	1987	orf19.6305		CR_04880W_A	Hydroxytrimethyllysine aldolase, the second enzyme in the carnitine biosynthesis pathway	0	0	NE
Plate 14	H02	2018	orf19.3577	COQ5	C2_05470W_A	Putative methyltransferase of ubiquinone biosynthesis; regulated by Gcn4; repressed by amino acid starvation (3-AT), Hap43; induced upon adherence to polystyrene; Spider biofilm repressed	0	0	NE
Plate 14	H03	2257	orf19.5384	CHS8	C3_00710W_A	Chitin synthase required for synthesis of long-chitin fibrils; nonessential; 8 or 9 membrane spanning regions; mRNA present in yeast and hyphae; induced during cell wall regeneration; fungal-specific (no human or murine homologs)	0	0	NE
Plate 14	H04	2289	orf19.7566		CR_09920W_A	Predicted amino acid transport domain; transcript upregulated in clinical strains from HIV+ patients with oral candidiasis; alkaline upregulated by Rim101; rat catheter, Spider and flow model biofilm induced	0	0	NE
Plate 14	H05	386	orf19.1837	TBP1	C1_10660W_A	Transcription initiation factor; binds TATA box sequence, binding does not require TFIIA; caspofungin repressed; functional homolog of S. cerevisiae and human TATA-binding proteins; Spider biofilm induced	0	4	E
Plate 14	H06	323	orf19.5232	CSI2	C1_12310C_A	Putative 66S pre-ribosomal particle component; Hap43-induced; essential for growth; transposon mutation affects filamentous growth; Spider biofilm induced	0	4	E
Plate 14	H07	349	orf19.2488	FAL1	C1_05640C_A	eIF4A subfamily of DEAD-box ATP-dependent RNA helicases; predicted nucleolar protein required for maturation of 18S rRNA; Spider biofilm induced	0	0	NE
Plate 14	H08	365	orf19.672		C1_11300C_A	Ortholog(s) have U5 snRNP localization	0	0	NE
Plate 14	H09	498	orf19.4191	RLP24	C4_00510C_A	Putative ribosomal protein; Hap43-induced; essential gene; heterozygous mutation confers hypersensitivity to 5-fluorocytosine (5-FC), 5-fluorouracil (5-FU), and tubercidin (7-deazaadenosine); Spider biofilm induced	0	0	NE
Plate 14	H10	499	orf19.2708		C4_02880C_A	Ortholog(s) have role in mature ribosome assembly and cytosol, nucleolus, polysome, preribosome, large subunit precursor localization	0	0	NE
Plate 14	H11	500	orf19.6039		C1_00660C_A	Ortholog(s) have SNAP receptor activity, role in ER to Golgi vesicle-mediated transport, intra-Golgi vesicle-mediated transport, vesicle fusion with Golgi apparatus and SNARE complex, cis-Golgi network, integral to membrane localization	0	4	E
Plate 14	H12	501	orf19.6175		C3_07800C_A	Putative 35S rRNA processing protein; Hap43-induced; repressed by prostaglandins; Spider biofilm induced	0	4	E
Plate 15	A01	314	orf19.2402	SSU72	CR_03210C_A	Ortholog(s) have CTD phosphatase activity, protein tyrosine phosphatase activity	0	4	E
Plate 15	A02	322	orf19.7618		CR_10410C_A	Putative nucleolar protein with a predicted role in pre-18S rRNA processing; Plc1p-regulated; Spider biofilm induced	0	4	E
Plate 15	A03	264	orf19.2518		CR_01350C_A	Ortholog(s) have ATPase activator activity, soluble NSF attachment protein activity	0	4	E
Plate 15	A04	324	orf19.5567	POP4	C6_02910W_A	Ortholog of S. cerevisiae Pop4; a subunit of both RNase MRP and nuclear RNase P; filament induced; regulated by Nrg1, Tup1; likely essential, based on UAU1 strategy; rat catheter and Spider biofilm induced	0	3	E
Plate 15	A05	325	orf19.706	NMD3	CR_06720W_A	Putative nonsense-mediated mRNA decay protein; repressed in core stress response; repressed by prostaglandins	0	4	E
Plate 15	A06	317	orf19.516		CR_04280C_A	S. cerevisiae ortholog Rft1p has role in glycolipid translocation, protein N-linked glycosylation and localizes to endoplasmic reticulum membrane; regulated by Sef1p-, Sfu1p-, and Hap43p	0	0	NE
Plate 15	A07	307	orf19.4582		C4_02090C_A	Ortholog(s) have role in U1 snRNA 3'-end processing, U4 snRNA 3'-end processing and U5 snRNA 3'-end processing, more	0	4	E
Plate 15	A08	205	orf19.684		C6_01920C_A	Putative transcription factor with zinc finger DNA-binding motif; heterozygous null mutant exhibits hypersensitivity to parnafungin and cordycepin in the C. albicans fitness test	0	4	E
Plate 15	A09	213	orf19.2104		C2_00290W_A	Ortholog(s) have chaperone binding activity, role in aerobic respiration, iron-sulfur cluster assembly and mitochondrion localization	0	0	NE
Plate 15	A10	106	orf19.7657	POP3	CR_10690W_A	Putative RNase MRP and nuclear RNase P component; decreased repressed by prostaglandins; Spider biofilm induced	0	0	NE
Plate 15	A11	147	orf19.4221	ORC4	C5_02150C_A	Phosphorylated protein similar to S. cerevisiae Orc4, subunit of the origin recognition complex (ORC); induced by alpha pheromone in SpiderM medium	0	4	E
Plate 15	A12	286	orf19.76	SPB1	C6_04160C_A	Putative AdoMet-dependent methyltransferase; Hap43-induced; repressed by prostaglandins; possibly essential gene, disruptants not obtained by UAU1 method; Spider biofilm induced	0	4	E
Plate 15	B01	288	orf19.3276	PWP2	CR_00800C_A	Putative 90S pre-ribosomal component; repressed in core stress response; repressed by prostaglandins; physically interacts with TAP-tagged Nop1; Hap43-induced	0	4	E
Plate 15	B02	295	orf19.6417	TSR1	CR_08490W_A	Component of 20S pre-rRNA processing unit; repressed by prostaglandins	0	3	E
Plate 15	B03	302	orf19.4628		C4_01650C_A	Putative cleavage and polyadenylation factor; heterozygous null mutant exhibits hypersensitivity to parnafungin and cordycepin in the C. albicans fitness test; possibly an essential gene, disruptants not obtained by UAU1 method	0	4	E
Plate 15	B04	304	orf19.6239		C1_06710W_A	Putative serine/threonine protein kinase; possibly an essential gene, disruptants not obtained by UAU1 method	0	1	GD
Plate 15	B05	305	orf19.4618	FBA1	C4_01750C_A	Fructose-bisphosphate aldolase; glycolytic enzyme; antigenic in murine/human infection; regulated by yeast-hypha switch; induced by Efg1, Gcn4, Hog1, fluconazole; phagocytosis-repressed; flow model biofilm induced; Spider biofilm repressed	0	4	E
Plate 15	B06	306	orf19.1305		C4_03730C_A	Ortholog(s) have tRNA (guanine) methyltransferase activity, role in tRNA methylation and mitochondrial matrix, nucleus localization	0	0.75	GD
Plate 15	B07	310	orf19.5432	TPT1	C3_00350W_A	tRNA 2'-phosphotransferase; enzyme of tRNA splicing; functionally complements viability of S. cerevisiae tpt1 null mutant	0	0	NE
Plate 15	B08	338	orf19.6879		C2_05670C_A	Ortholog(s) have tRNA-intron endonuclease activity, role in tRNA-type intron splice site recognition and cleavage and mitochondrial outer membrane, tRNA-intron endonuclease complex localization	0	0	NE
Plate 15	B09	339	orf19.3590	IPP1	C2_08810C_A	Putative inorganic pyrophosphatase; antigenic; soluble protein in hyphae; macrophage-induced protein; protein present in exponential and stationary phase yeast; possibly essential (UAU1 method); sumoylation target; Spider biofilm repressed	0	4	E
Plate 15	B10	340	orf19.661	KRR1	C1_11420W_A	Putative nucleolar protein; repressed benomyl treatment or in an azole-resistant strain that overexpresses MDR1; F-12/CO2 early biofilm induced	0	4	E
Plate 15	B11	341	orf19.7644		CR_10610C_A	Ortholog(s) have ubiquitin-protein ligase activity, role in anaphase-promoting complex-dependent proteasomal ubiquitin-dependent protein catabolic process, protein ubiquitination and anaphase-promoting complex localization	0	4	E
Plate 15	B12	342	orf19.6424		CR_08560C_A	Ortholog(s) have SUMO ligase activity and role in cell cycle checkpoint, mitotic spindle elongation, protein sumoylation, regulation of mitotic cell cycle, response to DNA damage stimulus	0	0	NE
Plate 15	C01	343	orf19.1299	RPN6	C4_03790W_A	Putative 26S proteasome subunit; Hap43p-induced gene; regulated by Gcn2p and Gcn4p	0	4	E
Plate 15	C02	344	orf19.2720		C4_02780W_A	Cytosolic chaperonin Cct ring complex subunit; role in the assembly of actin and tubulins; Spider biofilm repressed	0	4	E
Plate 15	C03	345	orf19.1742	HEM3	C2_10360C_A	Hydroxymethylbilane synthase; converts 4-porphobilinogen to hydroxymethylbilane in heme biosynthesis; induced in high iron, CO2; alkaline repressed; regulated by Sef1, Sfu1, and Hap43; rat catheter and Spider biofilm induced	0	4	E
Plate 15	C04	346	orf19.526	NHP2	CR_04360C_A	Putative H/ACA snoRNP protein; macrophage/pseudohyphal-induced	0	0	NE
Plate 15	C05	347	orf19.7477	YRB1	CR_00580W_A	Functional homolog of S. cerevisiae Yrb1p; regulates Gsp1 GTPase activity and thereby affects nucleocytoplasmic transport and cytoskeletal dynamics; transcript is not regulated by white-opaque switch or by dimorphic transition	0	4	E
Plate 15	C06	348	orf19.6910	PSF1	C7_01300C_A	Putative GINS complex subunit which is localized to DNA replication origins; implicated in assembly of the DNA replication machinery; flow model biofilm induced	0	1	GD
Plate 15	C07	350	orf19.269	SES1	C3_02780W_A	Seryl-tRNA synthetase; charges the tRNA that recognizes the CUG codon, which typically specifies Leu, but specifies Ser in C. albicans; complements S. cerevisiae ses1 mutant viability; soluble protein in hyphae; macrophage-regulated	0	4	E
Plate 15	C08	351	orf19.6749	KRS1	C3_07410C_A	Putative tRNA-Lys synthetase; repressed upon phagocytosis by murine macrophages; stationary phase enriched protein; Spider biofilm repressed	0	4	E
Plate 15	C09	363	orf19.401	TCP1	C1_08560W_A	Chaperonin-containing T-complex subunit, induced by alpha pheromone in SpiderM medium; stationary phase enriched protein	0	4	E
Plate 15	C10	364	orf19.528	SEC26	CR_04380C_A	Secretory vesicles coatomer complex protein	0	4	E
Plate 15	C11	366	orf19.4078		C2_09160W_A	Ortholog(s) have role in U1 snRNA 3'-end processing, U4 snRNA 3'-end processing and U5 snRNA 3'-end processing, more	0	4	E
Plate 15	C12	367	orf19.2799	GPI8	C1_07460C_A	Protein similar to S. cerevisiae Gpi8p, which is a subunit of the GPI transamidase complex that adds GPI anchors to proteins; likely to be essential for growth, based on an insertional mutagenesis strategy	0	1	GD
Plate 15	D01	368	orf19.4726		C1_08680C_A	Ortholog(s) have calcium ion binding, enzyme activator activity, role in regulation of conjugation with cellular fusion, regulation of signal transduction and Golgi membrane, cytosol, nucleus, plasma membrane localization	0	0	NE
Plate 15	D02	370	orf19.5074		C1_08020W_A	Ortholog(s) have SUMO activating enzyme activity, role in protein sumoylation and SUMO activating enzyme complex localization	0	0	NE
Plate 15	D03	371	orf19.5793	PR26	C2_03060W_A	Protein with similarity to proteasomal 26S regulatory subunit of S. cerevisiae, H. sapiens, Methanobacterium thermoautotrophicum (Archaebacterium)	0	4	E
Plate 15	D04	372	orf19.3347	RPB7	C1_01570C_A	Functional homolog of S. cerevisiae Rpb7; essential subunit of RNA Polymerase II; enhances hyperfilamentation of an S. cerevisiae rpb4 mutant; suppresses defects of S. cerevisiae rpb4 and ess1 mutants; Spider biofilm repressed	0	4	E
Plate 15	D05	373	orf19.2893		C4_06410W_A	Protein of unknown function; regulation correlates with clinical development of fluconazole resistance; transcript is upregulated in an RHE model of oral candidiasis	0	0	NE
Plate 15	D06	374	orf19.7236	TIF35	C1_14260C_A	Putative translation initiation factor; repressed upon phagocytosis by murine macrophage; Spider biofilm repressed	0	4	E
Plate 15	D07	369	orf19.410		NA	Deleted from genome assembly	#N/A	#N/A	#N/A
Plate 15	D08	375	orf19.1115	GUK1	C5_03790W_A	Putative guanylate kinase; identified in extracts from biofilm and planktonic cells; protein level decrease in stationary phase cultures; Hap43p-induced gene	0	4	E
Plate 15	D09	377	orf19.6696	TIM9	C7_03630C_A	Predicted protein of the mitochondrial intermembrane space; rat catheter biofilm induced; Spider biofilm repressed	0	4	E
Plate 15	D10	392	orf19.2960	FRS2	C1_02710W_A	Putative tRNA-Phe synthetase; downregulated upon phagocytosis by murine macrophage; protein present in exponential and stationary growth phase yeast cultures; Spider biofilm repressed	0	4	E
Plate 15	D11	385	orf19.3628	RSP5	C2_08500W_A	Putative NEDD4 family E3 ubiquitin ligase; induced during infection of murine kidney, compared to growth in vitro; has murine homolog; possibly an essential gene, disruptants not obtained by UAU1 method	0	0	NE
Plate 15	D12	381	orf19.4025	PRE1	C5_05310W_A	Putative beta 4 subunit of the 20S proteasome; Rim101-induced at acid pH; flucytosine induced; amphotericin B repressed	0	4	E
Plate 15	E01	382	orf19.3054	RPN3	C1_03520W_A	Putative non-ATPase regulatory subunit of the 26S proteasome lid; amphotericin B repressed; oxidative stress-induced via Cap1p	0	4	E
Plate 15	E02	389	orf19.4154		C5_01600C_A	Ortholog(s) have pseudouridine synthase activity, role in tRNA pseudouridine synthesis and cytosol, nucleus localization	0	3.5	E
Plate 15	E03	215	orf19.2417	SMC5	CR_03100W_A	Protein similar to S. cerevisiae Smc5p, which is involved in DNA repair; transposon mutation affects filamentous growth	0	2.75	GD
Plate 15	E04	266	orf19.4028		C5_05330C_A	Putative cis-prenyltransferase involved in dolichol synthesis; participates in endoplasmic reticulum (ER) protein sorting; flow model biofilm induced	0	1	GD
Plate 15	E05	267	orf19.1279	CDS1	C5_04100W_A	Protein similar to S. cerevisiae Cds1p; transposon mutation affects filamentous growth	0	3.5	E
Plate 15	E06	263	orf19.2756		C4_02460W_A	Ortholog(s) have HDEL sequence binding activity, role in ER to Golgi vesicle-mediated transport, protein retention in ER lumen and Golgi apparatus, integral to endoplasmic reticulum membrane localization	0	4	E
Plate 15	E07	262	orf19.2796		C1_07490C_A	Ortholog(s) have DNA-directed DNA polymerase activity, role in DNA replication initiation, telomere capping and alpha DNA polymerase:primase complex, cytosol, nuclear envelope localization	0	2.5	GD
Plate 15	E08	318	orf19.5528	MOB1	C6_02590C_A	Putative mitotic exit network component; periodic mRNA expression, peak at cell-cycle G2/M phase	0	0	NE
Plate 15	E09	258	orf19.2093	RFA1	C2_00380C_A	Putative DNA replication factor A; RNA abundance regulated by cell cycle, tyrosol and cell density	0	4	E
Plate 15	E10	260	orf19.514	SNP3	CR_04260W_A	Putative U6 snRNA-associated protein; transcript regulated by Mig1	0	1.25	GD
Plate 15	E11	261	orf19.930	PET9	C5_00590W_A	Mitochondrial ADP/ATP carrier protein involved in ATP biosynthesis; possible lipid raft component; 3 predicted transmembrane helices; flucytosine induced; ketoconazole-induced; downregulated by Efg1p	0	0	NE
Plate 15	E12	265	orf19.2138	ILS1	C6_04520W_A	Putative isoleucyl-tRNA synthetase, the target of drugs including the cyclic beta-amino acid icofungipen/PLD-118/BAY-10-8888 and mupirocin; protein present in exponential and stationary growth phase yeast cultures	0	4	E
Plate 15	F01	320	orf19.3673		C1_02160W_A	Ortholog(s) have Rab guanyl-nucleotide exchange factor activity, role in ER to Golgi vesicle-mediated transport, chromosome organization and TRAPP complex, cytosol, nucleus localization	0	4	E
Plate 15	F02	173	orf19.2688	NAN1	C4_03030C_A	Putative U3 snoRNP protein; Hap43p-induced gene; physically interacts with TAP-tagged Nop1p	0	4	E
Plate 15	F03	226	orf19.6252		C1_06590C_A	Ortholog(s) have RNA polymerase II transcription factor binding transcription factor activity, core RNA polymerase II binding transcription factor activity	0	0	NE
Plate 15	F04	327	orf19.5076	PFY1	C1_08030W_A	Profilin; functional homolog of S. cerevisiae Pfy1; hyphae, macrophage/pseudohyphal-induced; regulated by Nrg1, Tup1; gene lacks intron (unlike S. cerevisiae PFY1); complements growth of S. cerevisiae srv2 mutant; nonessential	0	0	NE
Plate 15	F05	328	orf19.6642		CR_05700C_A	Ortholog(s) have role in ER to Golgi vesicle-mediated transport, negative regulation of G0 to G1 transition and ER to Golgi transport vesicle, endoplasmic reticulum membrane, integral to Golgi membrane localization	0	4	E
Plate 15	F06	329	orf19.5817		C2_02870W_A	Ortholog(s) have Rab guanyl-nucleotide exchange factor activity, role in ER to Golgi vesicle-mediated transport, intra-Golgi vesicle-mediated transport and TRAPP complex, cis-Golgi network membrane, cytosol, nucleus localization	0	0	NE
Plate 15	F07	332	orf19.3951	TIP1	C5_04660C_A	Protein with a predicted role in biogenesis of ER-derived COPII transport vesicles; mutation confers hypersensitivity to toxic ergosterol analog	0	4	E
Plate 15	F08	336	orf19.5010	DIM1	C1_13730C_A	Putative 18S rRNA dimethylase; predicted role in rRNA modification and processing; Hap43-induced; likely to be essential for growth based on insertional mutagenesis strategy; F-12/CO2 early biofilm induced	0	3.5	E
Plate 15	F09	313	orf19.1814	STT4	CR_07090W_A	Putative phosphatidylinositol-4-kinase	0	0	NE
Plate 15	F10	233	orf19.6131	KSR1	CR_07380C_A	3-ketosphinganine reductase, catalyzes the second step in phytosphingosine synthesis	0	0	NE
Plate 15	F11	31	orf19.4606	ERG8	C4_01870C_A	Putative phosphomevalonate kinase; enzyme of the mevalonate pathway of isoprenoid biosynthesis; transcript regulated by Nrg1; possible drug target; not conserved in H. sapiens	0	4	E
Plate 15	F12	181	orf19.4863	PDC2	C1_09970C_A	Homeodomain-like transcription factor; regulator of pyruvate decarboxylase; contains a putative C-terminal activation domain, Glu- and Pro-rich; complements glucose utilization defect of S. cerevisiae pdc2 mutant	0	0	NE
Plate 15	G01	182	orf19.3256	SLN1	CR_01000C_A	Histidine kinase involved in a two-component signaling pathway that regulates cell wall biosynthesis; mutants are sensitive to growth on H2O2 medium; rat catheter and Spider biofilm induced	0	0	NE
Plate 15	G02	183	orf19.1589		C2_02630W_A	Putative transcription factor component of the core factor (CF) rDNA transcription factor complex; Spider biofilm induced	0	1.25	GD
Plate 15	G03	184	orf19.4448	SOG2	C1_07190W_A	Leucine-rich-repeat domain protein of RAM cell wall integrity signaling network; role in cell separation, azole sensitivity; required for hyphal growth; lacks orthologs in higher eukaryotes	0	0	NE
Plate 15	G04	185	orf19.2041		C2_00830C_A	Ortholog(s) have DNA translocase activity, histone acetyl-lysine binding activity	0	0	NE
Plate 15	G05	186	orf19.2507	ARP9	C3_01030W_A	Protein similar to S. cerevisiae Arp3p, a component of the Arp2/3 complex involved in actin-dependent processes; likely to be essential for growth, based on an insertional mutagenesis strategy	0	1	GD
Plate 15	G06	188	orf19.5356		C2_10740C_A	Protein with a predicted role in cell wall integrity; repressed in core stress response	0	4	E
Plate 15	G07	190	orf19.1609		C3_02350W_A	Ortholog(s) have role in endonucleolytic cleavage in ITS1 to separate SSU-rRNA from 5.8S rRNA and LSU-rRNA from tricistronic rRNA transcript (SSU-rRNA, 5.8S rRNA, LSU-rRNA) and nucleolus, spindle pole body localization	0	1.25	GD
Plate 15	G08	297	orf19.3116	EXM2	C4_06930C_A	Putative U1 snRNP complex compotent; decreased transcription is observed upon fluphenazine treatment	0	4	E
Plate 15	G09	69	orf19.1885	TAF4	C2_07460W_A	Putative TFIID subunit; mutation confers hypersensitivity to toxic ergosterol analog	0	4	E
Plate 15	G10	225	orf19.2922		C4_06150C_A	Ortholog(s) have double-stranded DNA binding activity, role in reciprocal meiotic recombination, synapsis and condensed nuclear chromosome localization	0	0	NE
Plate 15	G11	141	orf19.680	TIM50	C1_11220C_A	Predicted component of the Translocase of the Inner Mitochondrial membrane (TIM23 complex); involved in mitochondrial protein import; Spider biofilm repressed	0	3.5	E
Plate 15	G12	216	orf19.2820		CR_02610C_A	Ortholog(s) have nucleocytoplasmic transporter activity, structural constituent of nuclear pore activity	0	0.5	GD
Plate 15	H01	132	orf19.4871	ERO1	C1_10040W_A	Ortholog of S. cerevisiae Ero1; role in formation of disulfide bonds in the endoplasmic reticulum; fluconazole-induced; induced by Mnl1 under weak acid stress; Spider biofilm induced	0	0	NE
Plate 15	H02	105	orf19.7037	YAE1	C7_00800C_A	Ortholog(s) have cytoplasm, nucleus localization	0	0	NE
Plate 15	H03	107	orf19.135	EXO84	C6_01280W_A	Predicted subunit of the exocyst complex, involved in exocytosis; localizes to a crescent on the surface of the hyphal tip	0	0	NE
Plate 15	H04	280	orf19.3322	DUT1	C1_01330C_A	dUTP pyrophosphatase; cell-cycle regulated if expressed in S. cerevisiae; upstream MluI and SCB elements; induced by 17-beta-estradiol, ethynyl estradiol, macrophages; levels decrease in stationary phase yeast; Spider biofilm repressed	0	0	NE
Plate 15	H05	281	orf19.3317	MED22	C1_01280C_A	RNA polymerase II mediator complex subunit	0	1.75	GD
Plate 15	H06	282	orf19.3314		C1_01260C_A	Ortholog(s) have role in ER to Golgi vesicle-mediated transport and TRAPP complex, cytosol, nucleus localization	0	0	NE
Plate 15	H07	285	orf19.5130	PDI1	C7_03250C_A	Putative protein disulfide-isomerase; antigenic in human infection; soluble protein in hyphae; transcription induced upon filamentous growth; protein present in exponential and stationary growth phase yeast cultures	0	0	NE
Plate 15	H08	289	orf19.3778		C4_05010W_A	Protein with a predicted role in ribosome biogenesis; mutation confers hypersensitivity to 5-fluorocytosine (5-FC), 5-fluorouracil (5-FU); repressed in core stress response; repressed by prostaglandins; Hap43-induced	0	4	E
Plate 15	H09	292	orf19.4724		C1_08660C_A	Ortholog(s) have RNA binding activity, role in spliceosomal complex assembly and U2-type prespliceosome localization	0	4	E
Plate 15	H10	293	orf19.5200	SIT4	C1_04380W_A	Serine/threonine protein phosphatase catalytic subunit; has a role in cell wall maintenance, hyphal growth, and virulence in a mouse systemic infection model	0	0	NE
Plate 15	H11	296	orf19.5647	SUB2	C4_00220C_A	Putative TREX complex component with a predicted role in nuclear mRNA export; transcription is regulated by Mig1; Hap43-induced gene; Spider biofilm repressed	0	4	E
Plate 15	H12	96	orf19.6524	TOM40	C7_01970C_A	Protein involved in mitochondrial protein import; Spider biofilm repressed	0	4	E
Plate 16	A01	241	orf19.2830	RRP9	CR_02710W_A	Ribosomal protein; mutation confers resistance to 5-fluorocytosine (5-FC), 5-fluorouracil (5-FU), and tubercidin (7-deazaadenosine); physically interacts with TAP-tagged Nop1; Hap43-induced; Spider biofilm induced	0	4	E
Plate 16	A02	242	orf19.1769		C2_10120W_A	Ortholog(s) have G-protein beta/gamma-subunit complex binding, actin binding activity, role in positive regulation of transcription from RNA polymerase II promoter by pheromones, protein folding and cytoplasm localization	0	0.5	GD
Plate 16	A03	243	orf19.5492		C2_06300W_A	Ortholog(s) have mRNA binding activity, role in mRNA splicing, via spliceosome and U1 snRNP, U2-type prespliceosome, commitment complex localization	0	0.75	GD
Plate 16	A04	244	orf19.302		C3_03060W_A	Ortholog(s) have Rab guanyl-nucleotide exchange factor activity, role in ER to Golgi vesicle-mediated transport and TRAPP complex, cytosol, nucleus localization	0	0	NE
Plate 16	A05	247	orf19.1646		C3_02020W_A	Ortholog(s) have role in endonucleolytic cleavage in 5'-ETS of tricistronic rRNA transcript (SSU-rRNA, 5.8S rRNA and LSU-rRNA), more	0	4	E
Plate 16	A06	248	orf19.5407	SOF1	C3_00560C_A	Putative protein with a predicted role in 40S ribosomal subunit biogenesis; rat catheter biofilm induced	0	4	E
Plate 16	A07	249	orf19.4835		C1_09710C_A	Ortholog(s) have role in endonucleolytic cleavage in 5'-ETS of tricistronic rRNA transcript (SSU-rRNA, 5.8S rRNA and LSU-rRNA), more	0	4	E
Plate 16	A08	252	orf19.6044	MOB2	C1_00620W_A	Mob1/phocein domain protein of RAM signaling network; cell wall integrity; role in cell separation, cortical actin polarization; required for hyphal growth; phosphorylated by Cdc28 on hyphal induction; activates Cbk1; mRNA binds She3	0	0.75	GD
Plate 16	A09	2572	orf19.498		CR_04140W_A	Putative mitochondrial ribosomal component of the small subunit; possibly an essential gene, disruptants not obtained by UAU1 method; Spider biofilm repressed	0	3	E
Plate 16	A10	2650	orf19.7597	PGA12	CR_10210W_A	Putative GPI-anchored protein	0	0	NE
Plate 16	A11	257	orf19.3575	CDC19	C2_05460W_A	Pyruvate kinase at yeast cell surface; Gcn4/Hog1/GlcNAc regulated; Hap43/polystyrene adherence induced; repressed by phagocytosis/farnesol; hyphal growth role; stationary phase enriched; flow model biofilm induced; Spider biofilm repressed	0	4	E
Plate 16	A12	1074	orf19.5131		C7_03240W_A	Ortholog of S. cerevisiae Gid7, a GID complex protein; involved in proteasome-dependent catabolite inactivation of fructose-1,6-bisphosphatase; Hap43-repressed gene	0	0	NE
Plate 16	B01	1911	orf19.2117	LEU5	C2_00150W_A	Putative mitochondrial carrier protein; Hap43-repressed; rat catheter biofilm induced	0	1.75	GD
Plate 16	B02	1938	orf19.3324	TIF	C1_01350C_A	Translation initiation factor; upregulated in highly virulent strain compared to less virulent strain; antigenic in human; flucytosine induced; downregulated upon phagocytosis by macrophages; Spider biofilm repressed	0	4	E
Plate 16	B03	1939	orf19.5858	EGD2	C3_04140C_A	Nascent polypeptide associated complex protein alpha subunit; soluble protein in hyphae; macrophage/pseudohyphal-induced; protein level decrease in stationary phase cultures; GlcNAc-induced protein; Spider biofilm repressed	0	0	NE
Plate 16	B04	2024	orf19.984	PHO8	C1_10430W_A	Putative repressible vacuolar alkaline phosphatase; Rim101-induced transcript; regulated by Tsa1, Tsa1B in minimal media at 37 deg; possibly adherence-induced	0	0	NE
Plate 16	B05	1327	orf19.2607		CR_02060W_A	Protein of unknown function; Spider biofilm induced	0	0	NE
Plate 16	B06	34	orf19.4106		C2_06120C_A	Ortholog of S. cerevisiae : YJR141W, C. glabrata CBS138 : CAGL0M00264g, C. parapsilosis CDC317 : CPAR2_104880 and Candida tenuis NRRL Y-1498 : CANTEDRAFT_126860	0	3.5	E
Plate 16	B07	352	orf19.2803	HEM13	C3_04060C_A	Coproporphyrinogen III oxidase; antigenic; on yeast cell surface, not hyphae; iron-regulated expression; Hap43, macrophage-repressed; farnesol-induced; possibly essential; flow model biofilm induced; rat catheter, Spider biofilm repressed	0	3	E
Plate 16	B08	3296	orf19.936		C5_00530W_A	Ortholog of C. parapsilosis CDC317 : CPAR2_303990, Candida tenuis NRRL Y-1498 : CANTEDRAFT_107934, Candida dubliniensis CD36 : CD36_50530 and Pichia stipitis Pignal : PICST_63283	0	0	NE
Plate 16	B09	3321	orf19.7382	CAM1	C3_06010W_A	Putative translation elongation factor eEF1 gamma; protein level decreased in stationary phase cultures; Spider biofilm repressed	0	0	NE
Plate 16	B10	3348	orf19.7561	DEF1	CR_09880W_A	RNA polymerase II regulator; role in filamentation, epithelial cell escape, dissemination in RHE model; induced by fluconazole, high cell density; Efg1/hyphal regulated; role in adhesion, hyphal growth on solid media; Spider biofilm induced	0	0	NE
Plate 16	B11	3368	orf19.5926	ARG11	C3_04660C_A	Putative ornithine transporter of the mitochondrial inner membrane; induced during the mating process	0	0	NE
Plate 16	B12	3400	orf19.641		CR_05130C_A	Ortholog(s) have role in protein folding and endoplasmic reticulum localization	0	0	NE
Plate 16	C01	3426	orf19.6169	ATO1	C3_00920W_A	Putative fungal-specific transmembrane protein; induced by Rgt1; Spider biofilm induced	0	0	NE
Plate 16	C02	3446	orf19.6858	EDC3	C4_05190C_A	Ortholog(s) have role in cytoplasmic mRNA processing body assembly, deadenylation-independent decapping of nuclear-transcribed mRNA and cytoplasmic mRNA processing body localization	0	0	NE
Plate 16	C03	3474	orf19.7269		C1_14500C_A	Putative polyamine acetyltransferase; acetylates polyamines (e.g. putrescine, spermidine, spermine) and aralkylamines (e.g. tryptamine, phenylethylamine); Spider biofilm repressed	0	0	NE
Plate 16	C04	3731	orf19.4195.1	FCA1	C6_00620W_A	Cytosine deaminase; enzyme of pyrimidine salvage; functional homolog of S. cerevisiae Fcy1p; mutation is associated with resistance to flucytosine (5-FC) in a clinical isolate; hyphal downregulated; gene has intron	0	0	NE
Plate 16	C05	3737	orf19.3534	RHO3	C2_05030C_A	Putative Rho family GTPase; possible substrate of protein farnesyltransferase and geranylgeranyltransferase type I; greater transcription in hyphal form than yeast form; plasma membrane-localized	0	0	NE
Plate 16	C06	3741	orf19.4274	PUT1	C5_02600W_A	Putative proline oxidase; alkaline upregulated by Rim101; flow model biofilm induced; Spider biofilm induced	0	0	NE
Plate 16	C07	1971	orf19.1395		C2_09590C_A	Ortholog(s) have inorganic phosphate transmembrane transporter activity, role in phosphate ion transport, transmembrane transport and mitochondrion localization	0	0	NE
Plate 16	C08	2109	orf19.2095		C2_00360C_A	Ortholog(s) have role in negative regulation of transcription from RNA polymerase II promoter in response to iron and cytosol, nucleus localization	0	0	NE
Plate 16	C09	2149	orf19.3047		C1_03450C_A	Protein kinase-related protein, required for normal sensitivity to caspofungin	0	0	NE
Plate 16	C10	3010	orf19.2131		C6_04470C_A	Ortholog(s) have ubiquitin-protein ligase activity, role in protein ubiquitination, ubiquitin-dependent protein catabolic process via the multivesicular body sorting pathway and Golgi apparatus, endoplasmic reticulum localization	0	0	NE
Plate 16	C11	3011	orf19.2143		C6_04530C_A	Ortholog(s) have role in endocytic recycling and cytosol, endosome, nucleus localization	0	0	NE
Plate 16	C12	3012	orf19.2146	HAT2	C6_04540C_A	Putative Hat1-Hat2 histone acetyltransferase complex subunit; role in DNA damage repair and morphogenesis; mutations cause constitutive pseudohyphal growth, caspofungin sensitivity; Spider biofilm repressed	0	0	NE
Plate 16	D01	3022	orf19.6322	ARD	C6_00150W_A	D-arabitol dehydrogenase, NAD-dependent (ArDH); enzyme of D-arabitol and D-arabinose catabolism; D-arabitol is a marker for active infection in humans; rat catheter and Spider biofilm induced	2	2	GD
Plate 16	D02	3024	orf19.2311	RPL82	C1_11030W_A	Predicted ribosomal protein; genes encoding cytoplasmic ribosomal subunits, translation factors, and tRNA synthetases are downregulated upon phagocytosis by murine macrophage	0	0	NE
Plate 16	D03	3054	orf19.28		C2_06520C_A	Putative thiamine transmembrane transporter; Spider biofilm induced	0	0	NE
Plate 16	D04	3085	orf19.5760	IHD1	C6_03850C_A	GPI-anchored protein; alkaline, hypha-induced; regulated by Nrg1, Rfg1, Tup1 and Tsa1, Tsa1B in minimal media at 37; oralpharyngeal candidasis induced ; Spider biofilm induced; regulated in Spider biofilms by Tec1, Efg1, Ndt80, Rob1, Brg1	0	0	NE
Plate 16	D05	2027	orf19.6382		CR_08200C_A	Putative MRP/CFTR-subfamily ABC transporter; member of multidrug resistance-associated protein (MRP) subfamily of ABC family; similar to S. cerevisiae Bpt1p	0	0	NE
Plate 16	D06	2039	orf19.2028	MXR1	C2_00960C_A	Putative methionine sulfoxide reductase; Plc1-regulated; induced by human neutrophils, flucytosine; macrophage regulated (gene induced, protein decreased); possibly adherence-induced; Spider biofilm induced	0	0	NE
Plate 16	D07	2108	orf19.2098	ARO8	C2_00340C_A	Aromatic transaminase of the Ehrlich fusel oil pathway of aromatic alcohol biosynthesis; Rim101 independent alkaline induction; protein abundance affected by URA3 expression in CAI-4 strain; Gcn4-regulated; stationary phase enriched	0	0	NE
Plate 16	D08	2126	orf19.6045		C1_00610W_A	Putative phosphatidylserine decarboxylase; involved in phosphatidylethanolamine; Spider biofilm repressed	0	1.5	GD
Plate 16	D09	3294	orf19.7231	FTR2	C1_14220C_A	High-affinity iron permease; probably interacts with ferrous oxidase; regulated by iron level, ciclopirox olamine, amphotericin B, caspofungin; complements S. cerevisiae ftr1 iron transport defect; Hap43-repressed; Spider biofilm induced	0	0	NE
Plate 16	D10	1188	orf19.5229		C1_12350W_A	Ortholog(s) have 3'-5'-exoribonuclease activity, endoribonuclease activity, tRNA binding activity	0	4	E
Plate 16	D11	73	orf19.4497	MED8	C2_04530W_A	Ortholog(s) have RNA polymerase II core promoter proximal region sequence-specific DNA binding, RNA polymerase II transcription corepressor activity, TBP-class protein binding, structural molecule activity	0	1	GD
Plate 16	D12	695	orf19.1111		C5_03830C_A	Ortholog(s) have chromatin binding, protein complex scaffold activity and role in RNA polymerase II transcriptional preinitiation complex assembly, histone acetylation	0	3.5	E
Plate 16	E01	708	orf19.1661	DBP5	C3_01860C_A	Ortholog(s) have RNA helicase activity, RNA-dependent ATPase activity, inositol hexakisphosphate binding activity and role in mRNA export from nucleus, translational termination	0	4	E
Plate 16	E02	712	orf19.5416	ESA1	C3_00490W_A	Subunit of the NuA4 histone acetyltransferase complex; member of MYST family; Spider biofilm induced	0	2.75	GD
Plate 16	E03	745	orf19.7635	DRS1	CR_10550W_A	Putative nucleolar DEAD-box protein; Hap43-induced; mutation confers hypersensitivity to 5-fluorouracil (5-FU), tubercidin (7-deazaadenosine); Tbf1-induced; repressed in core stress response	0	4	E
Plate 16	E04	758	orf19.1413	YFH1	C4_04340C_A	Frataxin; may be required for iron storage or delivery; role in oxidative stress resistance; transcript regulated by Nrg1, repressed if iron absent induced by macrophage interaction; Hap43-repressed gene	0	0	NE
Plate 16	E05	761	orf19.6913	GCN2	C7_01330C_A	Translation initiation factor 2-alpha (eIF2alpha) kinase; has nonessential role in amino acid starvation response, in contrast to S. cerevisiae homolog; similar to S. cerevisiae Gcn2p	0	0	NE
Plate 16	E06	803	orf19.4341		C5_03120W_A	Ortholog(s) have GPI-anchor transamidase complex localization	0	0.75	GD
Plate 16	E07	1880	orf19.3207	CCN1	C5_01680C_A	G1 cyclin; required for hyphal growth maintenance (not initiation); cell-cycle regulated transcription (G1/S); Cdc28p-Ccn1p initiates Cdc11p S394 phosphorylation on hyphal induction; expression in S. cerevisiae inhibits pheromone response	0	0	NE
Plate 16	E08	465	orf19.57	PSF2	C1_05030C_A	Ortholog(s) have role in DNA replication initiation, GINS complex assembly, double-strand break repair via break-induced replication, meiotic chromosome segregation, protein localization to nucleus	0	0	NE
Plate 16	E09	414	orf19.2909	ERG26	C4_06270C_A	C-3 sterol dehydrogenase, catalyzes the 2nd of 3 steps required to remove 2 C-4 methyl groups from an intermediate in ergosterol biosynthesis; amphotericin B, caspofungin repressed; Spider biofilm repressed	0	2.83333	GD
Plate 16	E10	468	orf19.5156		C7_03050W_A	Protein similar to S. cerevisiae Phs1p, which is required for growth; has six putative membrane-spanning regions	2	2	GD
Plate 16	E11	355	orf19.6529	CDC34	C7_01920W_A	Putative ubiquitin-protein ligase; transcript regulated by Nrg1 and Tup1, and by Gcn2 and Gcn4; rat catheter biofilm induced	0	0	NE
Plate 16	E12	308	orf19.3166		C5_02050W_A	Ortholog(s) have role in Golgi to endosome transport, cell morphogenesis, endoplasmic reticulum organization and endosome, mitochondrion, trans-Golgi network localization	0	0	NE
Plate 16	F01	312	orf19.1803	CDC43	CR_04910W_A	Beta subunit of heterodimeric protein geranylgeranyltransferase type I; GGTase I enzyme binds zinc, is Mg-dependent; Cdc42p is GGTase I substrate	0	0	NE
Plate 16	F02	2013	orf19.583		C5_00800C_A	Indoleamine 2,3-dioxygenase (IDO); rate-limiting enzyme of tryptophan catabolism via kynurenine; enzyme inhibition by 1-methyl-D,L-tryptophan increases hyphal growth; expressed in yeast and hyphae; rat catheter and Spider biofilm induced	0	0	NE
Plate 16	F03	2020	orf19.3567	BIO32	C2_05360C_A	Putative class III aminotransferase with a predicted role in biotin biosynthesis; Spider biofilm induced	0	0	NE
Plate 16	F04	2733	orf19.1180		C6_00210W_A	Putative 2-aminoadipate transaminase; rat catheter and Spider biofilm repressed	0	0	NE
Plate 16	F05	2753	orf19.4899	GCA1	C1_10290W_A	Extracellular/plasma membrane-associated glucoamylase; expressed in rat oral infection; regulated by carbohydrates, pH, galactose; promotes biofilm matrix formation; flow model biofilm induced; Bcr1 repressed in RPMI a/a biofilms	1.75	2	GD
Plate 16	F06	2800	orf19.4128		C2_04830W_A	Ortholog of C. parapsilosis CDC317 : CPAR2_209600, Candida tenuis NRRL Y-1498 : CANTEDRAFT_134010, Debaryomyces hansenii CBS767 : DEHA2C14960g and Candida dubliniensis CD36 : CD36_19390	0	0	NE
Plate 16	F07	2814	orf19.2626	RGD3	CR_07560W_A	Putative Rho GTPase activating protein; fungal-specific (no human or murine homolog)	0	0	NE
Plate 16	F08	2058	orf19.1891	APR1	C2_07400C_A	Vacuolar aspartic proteinase; transcript equivalent in yeast-form and mycelial cells but is elevated at lower growth temperatures; upregulated iby human neutrophils; protein enriched in stationary phase; Spider biofilm induced	0	0	NE
Plate 16	F09	2059	orf19.1881		C2_07480W_A	Ortholog(s) have 1-acylglycerol-3-phosphate O-acyltransferase activity, 1-acylglycerophosphocholine O-acyltransferase activity, role in glycerophospholipid biosynthetic process and endoplasmic reticulum, ribosome localization	0	0	NE
Plate 16	F10	2061	orf19.1871		C2_07560W_A	Ortholog(s) have structural molecule activity, role in histone exchange and Swr1 complex localization	0	0	NE
Plate 16	F11	2062	orf19.1865		C2_07600C_A	S. cerevisiae ortholog Mcs7 has a role in reciprocal meiotic recombination; Spider biofilm repressed	0	0	NE
Plate 16	F12	2063	orf19.496		CR_04120C_A	Ortholog(s) have DNA-dependent ATPase activity, dinucleotide insertion or deletion binding, guanine/thymine mispair binding activity, role in mismatch repair, mitochondrial DNA repair and mitochondrion localization	0	0	NE
Plate 16	G01	2065	orf19.1477		C2_01660C_A	Protein of unknown function; possible ER protein; Hap43p-repressed; Spider biofilm induced	0	0	NE
Plate 16	G02	2066	orf19.1468		C2_01600C_A	Ortholog(s) have protein phosphatase type 2A regulator activity	0	0	NE
Plate 16	G03	2067	orf19.1462	SMP2	C2_01550W_A	Putative Mg2+-dependent phosphatidate phosphatase; transcript regulated by Nrg1	0	0	NE
Plate 16	G04	2071	orf19.6875	VPS35	C2_05650W_A	Putative role in vacuolar sorting; downregulated in biofilm; induced upon adherence to polystyrene	0	0	NE
Plate 16	G05	2076	orf19.6904	GCN3	C7_01220W_A	Putative translation initiator; downregulated in the presence of human whole blood or polymorphonuclear (PMN) cells	0	0	NE
Plate 16	G06	2079	orf19.6915	MRE11	C7_01340W_A	Putative DNA double-strand break repair factor; involved in response to oxidative stress and drug resistance	0	0	NE
Plate 16	G07	2080	orf19.3298	CCH1	C1_01100W_A	Voltage-gated Ca2+ channel of the high affinity calcium uptake system; roles in thigmotropism, establishment of galvanotropism; transcript regulated by Nrg1 and Mig1	0	0	NE
Plate 16	G08	2081	orf19.3307		C1_01190C_A	Flavin-containing monooxygenase; catalyzes oxidation of biological thiols to maintain the ER redox buffer ratio for correct folding of disulfide-bonded proteins; Spider biofilm repressed	0	0	NE
Plate 16	G09	2084	orf19.350	PRE9	C3_03520C_A	Alpha3 (C9) subunit of the 20S proteasome; transcript regulated by Mig1	0	0	NE
Plate 16	G10	2088	orf19.4447	YMC1	C1_07200W_A	Putative inner mitochondrial membrane transporter; flucytosine induced; Spider biofilm repressed	0	0	NE
Plate 16	G11	2091	orf19.897	VPS20	C2_03310C_A	ESCRT III complex protein; role in multivesicular body (MVB) trafficking; required for processing of Rim8; Bcr1-repressed in RPMI a/a biofilms	0	0	NE
Plate 16	G12	2094	orf19.6933		C3_03830W_A	Ortholog(s) have peptidyl-prolyl cis-trans isomerase activity, protein phosphatase type 2A regulator activity and role in mitotic spindle organization in nucleus, response to osmotic stress	0	0	NE
Plate 16	H01	2098	orf19.4845		C1_09800C_A	Putative integral membrane protein; fluconazole-induced	0	0	NE
Plate 16	H02	2141	orf19.6981		C3_05430W_A	Ortholog of S. cerevisiae : YKR051W, C. glabrata CBS138 : CAGL0K08228g, C. parapsilosis CDC317 : CPAR2_405720 and Candida tenuis NRRL Y-1498 : CANTEDRAFT_124861	0	0	NE
Plate 16	H03	2143	orf19.6990		C3_05550C_A	Putative peptidyl-prolyl cis-trans isomerase; predicted endoplasmic reticulum (ER) localization	0	0	NE
Plate 16	H04	2146	orf19.3029		C1_03320C_A	Predicted 3-hydroxyisobutyryl-CoA hydrolase; mitochondrially localized; Spider biofilm induced	0	0	NE
Plate 16	H05	2147	orf19.3035		C1_03360W_A	Ortholog(s) have ATP-dependent DNA helicase activity, chromatin DNA binding, methylated histone residue binding, rDNA binding activity	0	0	NE
Plate 16	H06	2150	orf19.3049		C1_03470C_A	Ortholog(s) have protein kinase activity, role in activation of bipolar cell growth, ascospore wall assembly, protein phosphorylation and cell division site, cytosol, nucleus, prospore membrane localization	0	0	NE
Plate 16	H07	2152	orf19.6425		CR_08570W_A	Ortholog(s) have role in nuclear-transcribed mRNA catabolic process, 3'-5' exonucleolytic nonsense-mediated decay, nuclear-transcribed mRNA catabolic process, non-stop decay and Ski complex, cytosol localization	0	0	NE
Plate 16	H08	2157	orf19.4587	HGH1	C4_02050W_A	Putative HMG1/2-related protein; transcript regulated by Mig1	0	0	NE
Plate 16	H09	2166	orf19.7029		C7_00870W_A	Putative guanine deaminase; mutation confers hypersensitivity to toxic ergosterol analog; Spider biofilm induced	0	0	NE
Plate 16	H10	2169	orf19.5025	MET3	C1_13870W_A	ATP sulfurlyase; sulfate assimilation; repressed by Met, Cys, Sfu1, or in fluconazole-resistant isolate; Hog1, caspofungin, white phase-induced; induced on biofilm formation, even in presence of Met and Cys; Spider, F-12/CO2 biofilm induced	0	0	NE
Plate 16	H11	2175	orf19.5004	RAD54	C1_13660W_A	Putative DNA-dependent ATPase involved in DNA repair; induced under hydroxyurea treatment; plays an essential role during mitotic growth; mutants display aberrant cell and nuclear morphology	0	0	NE
Plate 16	H12	2178	orf19.7152		C7_04210C_A	Protein similar to Aspergillus CYSK O-acetylserine sulfhydrylase, suggesting that C. albicans uses an O-acetyl-serine (OAS) pathway of sulfur assimilation; upregulated in biofilm; protein level decreases in stationary phase cultures	0	0	NE
Plate 17	A01	2179	orf19.7156	FAA2-3	C7_04180W_A	Predicted acyl CoA synthetase	0	0	NE
Plate 17	A02	2388	orf19.5720		C6_03540W_A	Predicted membrane transporter, member of the monocarboxylate porter (MCP) family, major facilitator superfamily (MFS); ketoconazole or caspofungin repressed; Spider biofilm induced	0	0	NE
Plate 17	A03	2414	orf19.3402	FPG1	C6_01820C_A	Formamidopyrimidine DNA glycosylase, involved in repair of gamma-irradiated DNA; Hap43p-repressed gene	0	0	NE
Plate 17	A04	2437	orf19.1719	SGA1	C3_01320C_A	Putative glucoamylase; induced in oralpharyngeal candidasis; rat catheter and Spider biofilm induced	0	2	GD
Plate 17	A05	2458	orf19.6195		C1_07090C_A	Ortholog(s) have 3'-5'-exoribonuclease activity	0	0	NE
Plate 17	A06	2466	orf19.6138		CR_07300W_A	Protein similar to ferric reductase Fre10p; possibly an essential gene, disruptants not obtained by UAU1 method	0	0	NE
Plate 17	A07	2494	orf19.2484		C1_05670W_A	Has domain(s) with predicted peptidase activity and role in proteolysis	0	0	NE
Plate 17	A08	2506	orf19.2008		C2_01160W_A	Ortholog(s) have S-methyl-5-thioribose-1-phosphate isomerase activity, role in L-methionine salvage from methylthioadenosine and cytosol, nucleus localization	0	0	NE
Plate 17	A09	2546	orf19.6699		C7_03650W_A	Ortholog(s) have histidinol-phosphatase activity, role in histidine biosynthetic process and cytosol, nucleus localization	0	0	NE
Plate 17	A10	2552	orf19.5658	MNN10	C4_00310C_A	Ortholog(s) have alpha-1,6-mannosyltransferase activity, role in barrier septum assembly and alpha-1,6-mannosyltransferase complex localization	0	0	NE
Plate 17	A11	294	orf19.6190	SRB1	C3_07950C_A	Essential GDP-mannose pyrophosphorylase; makes GDP-mannose for protein glycosylation; functional in S. cerevisiae psa1; on yeast-form, not hyphal cell surface; alkaline induced; induced on adherence to polystyrene; Spider biofilm repressed	0	4	E
Plate 17	A12	356	orf19.6828.1		C3_06750W_A	Ortholog(s) have P-P-bond-hydrolysis-driven protein transmembrane transporter activity, structural molecule activity	0	1.5	GD
Plate 17	B01	358	orf19.3034	RLI1	C1_03350C_A	Member of RNase L inhibitor (RLI) subfamily of ABC family; predicted not to be a transporter; regulated by Sef1p, Sfu1p, and Hap43p	0	4	E
Plate 17	B02	359	orf19.3242		CR_01120C_A	Putative TFIID and SAGA complex subunit; possibly an essential gene, disruptants not obtained by UAU1 method	0	0	NE
Plate 17	B03	360	orf19.1378	SUP35	C2_09720W_A	Translation factor eRF3; shows prion-like aggregation in some, not all, studies; partially complements S. cerevisiae sup35 mutant translation defect; species barrier with S. cerevisiae Sup35p prion; gene not regulated by yeast-hyphal switch	0	4	E
Plate 17	B04	1853	orf19.744	GDB1	C4_05140C_A	Putative glycogen debranching enzyme; expression is regulated upon white-opaque switch; regulated by Nrg1, Tup1; rat catheter biofilm repressed	0	0.5	GD
Plate 17	B05	1855	orf19.5377	HOS2	C3_00780W_A	Putative histone deacetylase; mutations affect filamentous growth; genetic evidence suggests that Set3p and Hos2p function together as a complex involved in regulation of white-opaque switching, morphogenesis, and virulence	0	0	NE
Plate 17	B06	1857	orf19.5480	ILV1	C2_06190W_A	Putative threonine dehydratase; regulated by Gcn4 and Gcn2; induced by amino acid starvation (3-AT); protein present in yeast exponential and stationary phase cultures; early-stage flow model biofilm induced	0.5	3	E
Plate 17	B07	1859	orf19.5484	SER1	C2_06210C_A	Putative 3-phosphoserine aminotransferase; predicted role in serine and glycine biosynthesis; protein present in exponential and stationary yeast growth phases; Spider biofilm repressed	0	0	NE
Plate 17	B08	1864	orf19.3751		CR_02210W_A	Putative serine/threonine protein kinase; possibly an essential gene, disruptants not obtained by UAU1 method	0	0	NE
Plate 17	B09	1869	orf19.3542	LEM3	C2_05110W_A	Putative membrane protein; mutation increases resistance to miltefosine; early-stage flow model biofilm induced	0	0	NE
Plate 17	B10	1870	orf19.299	ECM14	C3_03030C_A	Ortholog(s) have role in fungal-type cell wall organization and endoplasmic reticulum, fungal-type vacuole localization	0	0	NE
Plate 17	B11	2053	orf19.4940		C1_13130C_A	Putative histidine permease; fungal-specific (no human or murine homolog); Hap43p-induced gene	0	0	NE
Plate 17	B12	11	orf19.7604		CR_10290C_A	Ortholog(s) have Rab guanyl-nucleotide exchange factor activity and role in early endosome to Golgi transport, intra-Golgi vesicle-mediated transport, regulation of Rab GTPase activity	0	0.5	GD
Plate 17	C01	1916	orf19.607		CR_07910C_A	Protein involved in transcription-coupled nucleotide excision repair of UV-induced DNA lesions; Spider biofilm induced	0	0	NE
Plate 17	C02	1940	orf19.5865		C3_04230W_A	Ortholog(s) have RNA-dependent ATPase activity, role in generation of catalytic spliceosome for first transesterification step and U2-type catalytic step 1 spliceosome localization	0	1	GD
Plate 17	C03	2099	orf19.4841	SHY1	C1_09760C_A	Cytochrome c oxidase biosynthesis protein; transcript regulated by Nrg1 and Mig1	0	0	NE
Plate 17	C04	2101	orf19.4827	ADE12	C1_09640W_A	Adenylosuccinate synthase; upregulated in biofilm; decreased expression in hyphae vs yeast-form cells; not induced during GCN response, in contrast to S. cerevisiae ADE12, which is induced by Gcn4p; stationary phase-enriched protein	0	4	E
Plate 17	C05	2102	orf19.4826	IDH1	C1_09630W_A	Putative mitochondrial NAD-isocitrate dehydrogenase subunit 1; soluble protein in hyphae; protein level decrease in stationary phase cultures	0	0	NE
Plate 17	C06	2110	orf19.2092		C2_00390C_A	Putative peroxisomal cystathionine beta-lyase; Gcn4p-regulated	0	0	NE
Plate 17	C07	2111	orf19.2073		C2_00540W_A	Protein with a multidrug and toxin extrusion protein domain; induced by Mnl1 under weak acid stress	0	0	NE
Plate 17	C08	2113	orf19.2067		C2_00600C_A	Protein with a predicted role in mitochondrial iron metabolism; Hap43-repressed; expression upregulated during growth in the mouse cecum; Spider biofilm induced	0	0	NE
Plate 17	C09	2117	orf19.3811	GYP1	C4_04710W_A	Putative Cis-golgi GTPase-activating protein; transcript regulated by Nrg1, Mig1, and Tup1	0	0	NE
Plate 17	C10	2119	orf19.3822	SCS7	C4_04590W_A	Putative ceramide hydroxylase; regulated by Nrg1; induced in high iron; fluconazole-induced; Hap43-repressed; Spider biofilm induced	0	0	NE
Plate 17	C11	2121	orf19.3841		C4_04450C_A	Putative protein serine/threonine kinase; predicted role in vesicle formation in autophagy and the cytoplasm-to-vacuole targeting (Cvt) pathway; Spider biofilm induced	0	0	NE
Plate 17	C12	2122	orf19.6558		C7_01660C_A	Has domain(s) with predicted zinc ion binding activity, role in ER to Golgi vesicle-mediated transport, intracellular protein transport and COPII vesicle coat localization	0	0	NE
Plate 17	D01	2123	orf19.6561	LAT1	C7_01640W_A	Putative dihydrolipoamide acetyltransferase component (E2) of pyruvate dehydrogenase complex; sumoylation target; Spider biofilm repressed	0	0	NE
Plate 17	D02	2124	orf19.6041	RPO41	C1_00640C_A	Putative mitochondrial RNA polymerase; repressed in core stress response; Spider biofilm induced	0	4	E
Plate 17	D03	2127	orf19.6058	GLO1	C1_00500C_A	Putative monomeric glyoxalase I; oxidative stress-induced via Cap1p	0	0	NE
Plate 17	D04	2129	orf19.6070	ENA2	C1_00390W_A	Putative sodium transporter; induced by ciclopirox olamine; alkaline induced by Rim101; repressed by high-level peroxide stress; induced in oral candidiasis clinical isolates; possibly essential gene; rat catheter and Spider biofilm induced	0	0	NE
Plate 17	D05	2131	orf19.6533	MSK1	C7_01870W_A	Putative mitochondrial lysine-tRNA synthetase; flucytosine repressed	0	1	GD
Plate 17	D06	2133	orf19.5280	MUP1	C1_11870W_A	Putative high affinity methionine permease; alkaline upregulated by Rim101; Spider biofilm induced	0	0	NE
Plate 17	D07	2134	orf19.5265	KIP4	C1_12010C_A	S. cerevisiae Smy1 ortholog; Tn mutation affects filamentous growth; filament induced; has Mob2-dependent hyphal regulation; regulated by Nrg1, Tup1; oralpharyngeal candidasis induced; Spider biofilm induced	0	0	NE
Plate 17	D08	2135	orf19.5263	SER33	C1_12030W_A	Predicted enzyme of amino acid biosynthesis; Gcn4p-regulated; upregulated in biofilm; protein present in exponential and stationary growth phase yeast cultures; S. cerevisiae ortholog is Gcn4p regulated	0	1.75	GD
Plate 17	D09	2136	orf19.5253		C1_12120W_A	Has domain(s) with predicted ATP binding, protein serine/threonine kinase activity and role in protein phosphorylation	0	0	NE
Plate 17	D10	1891	orf19.4297	CKB2	C5_02760W_A	Regulatory subunit of protein kinase CK2 (casein kinase II), beta' subunit; null mutants are hypersensitive to caspofungin	0	0	NE
Plate 17	D11	1917	orf19.606		CR_07920W_A	Protein of unknown function; Hap43-induced; Spider biofilm induced	0.75	1	GD
Plate 17	D12	1925	orf19.1324	RAD2	C4_03550W_A	Ortholog of S. cerevisiae Rad2, a nucleotide excision repair nuclease; null mutant is extremely sensitive to UV irradiation; transcript induced by interaction with macrophages	0	0	NE
Plate 17	E01	2028	orf19.6385	ACO1	CR_08210C_A	Aconitase; induced in high iron; 2 upstream CCAAT motifs; amino acid starvation (3-AT), amphotericin B, phagocytosis, farnesol induced; Hap43, fluconazole-repressed; Gcn4-regulated; antigenic in infection; Spider biofilm repressed	0	0	NE
Plate 17	E02	2029	orf19.3870	ADE13	CR_06150C_A	Adenylosuccinate lyase; enzyme of adenine biosynthesis; soluble protein in hyphae; not induced during GCN response, in contrast to the S. cerevisiae ortholog; repressed by nitric oxide	0	3.25	E
Plate 17	E03	2034	orf19.2251	AAH1	C2_06970W_A	Adenine deaminase; purine salvage and nitrogen catabolism; colony morphology-related regulation by Ssn6; Hog1, CO2-induced; chlamydospore formation repressed in C. albicans and C. dubliniensis; rat catheter and F-12/CO2 biofilm induced	0	0	NE
Plate 17	E04	2038	orf19.4932		C1_13060C_A	Ortholog(s) have role in mitochondrial translation and mitochondrion localization	0	1	GD
Plate 17	E05	2041	orf19.2031	VPS24	C2_00930C_A	Protein similar to S. cerevisiae Vps24p, which is a member of the ESCRT III protein sorting complex; downregulated upon adherence to polystyrene	0	0	NE
Plate 17	E06	2045	orf19.2043		C2_00810C_A	Has domain(s) with predicted ATP binding, nucleoside-triphosphatase activity	0	0	NE
Plate 17	E07	2047	orf19.2046	POT1-2	C2_00780W_A	Putative peroxisomal 3-ketoacyl CoA thiolase; Hap43-repressed	0	0	NE
Plate 17	E08	2048	orf19.2050		C2_00740C_A	Ortholog(s) have sterol esterase activity, role in cellular lipid metabolic process, sterol metabolic process and fungal-type vacuole, integral to membrane, lipid particle localization	0	0	NE
Plate 17	E09	2052	orf19.4945	MSH6	C1_13170C_A	Protein similar to S. cerevisiae Msh6p, which is involved in mismatch repair; repressed under Cdc5p depletion; Hap43p-induced gene	0	0	NE
Plate 17	E10	2128	orf19.6063	UBP6	C1_00440W_A	Putative ubiquitin-specific protease of the 26S proteasome; oxidative stress-induced via Cap1p	0	0	NE
Plate 17	E11	1945	orf19.6237	RAC1	C1_06730W_A	G-protein of RAC subfamily; required for embedded filamentous growth, not for serum-induced hyphal growth; dynamic localization at plasma membrane and nucleus; similar to, but not interchangeable with, Cdc42p; lacks S. cerevisiae homolog	0	0	NE
Plate 17	E12	1988	orf19.6306		CR_04870C_A	Trimethylaminobutyraldehyde dehydrogenase, the third enzyme of the carnitine biosynthesis pathway	0	0	NE
Plate 17	F01	1992	orf19.2306		C1_11100W_A	Ortholog(s) have oxidoreductase activity, acting on single donors with incorporation of molecular oxygen, incorporation of two atoms of oxygen activity and role in L-methionine salvage from methylthioadenosine	0	0	NE
Plate 17	F02	1998	orf19.1936	SNF1	C5_01320W_A	Essential protein; functional homolog of S. cerevisiae Snf1p regulator of sugar metabolism; constitutively expressed; Thr208 phosphorylation may have regulatory role; up-regulation associated with azole resistance; has polyhistidine tract	0	1	GD
Plate 17	F03	2009	orf19.3982		C5_04940W_A	Maltase; induced during growth on sucrose; induced by alpha pheromone in SpiderM medium; early-stage flow model biofilm indced	0	0	NE
Plate 17	F04	1942	orf19.6011	SIN3	C1_00930C_A	Protein similar to S. cerevisiae Sin3p (transcriptional corepressor involved in histone deacetylase recruitment); has paired amphipathic helix PAH1 domain; interacts with ScOpi1p, not CaOpi1p; transposon mutation affects filamentous growth	0	0	NE
Plate 17	F05	1951	orf19.2425	HGT18	CR_03040C_A	Putative glucose transporter of the major facilitator superfamily; the C. albicans glucose transporter family comprises 20 members; 12 probable membrane-spanning segments; expressed in rich medium with 2% glucose	0	0	NE
Plate 17	F06	1953	orf19.2415		CR_03110W_A	Ortholog(s) have role in mitochondrial translation and mitochondrion localization	0	0.5	GD
Plate 17	F07	1979	orf19.6178	FBP1	C3_07830W_A	Fructose-1,6-bisphosphatase; key gluconeogenesis enzyme; regulated by Efg1, Ssn6; induced by phagocytosis; effects switch from glycolysis to gluconeogenesis in macrophage; rat flow model biofilm induced; overlaps orf19.6179	0	0	NE
Plate 17	F08	1984	orf19.6287	AAT21	CR_07620W_A	Putative aspartate aminotransferase; stationary phase enriched protein; Gcn4-regulated; Spider biofilm induced	0	0	NE
Plate 17	F09	2245	orf19.7390	REV3	C3_06080W_A	Ortholog(s) have DNA-directed DNA polymerase activity, role in error-free translesion synthesis, error-prone translesion synthesis and cytosol, mitochondrion, nuclear chromatin, nucleus, zeta DNA polymerase complex localization	0	0	NE
Plate 17	F10	2327	orf19.2124		C6_04410C_A	Predicted alcohol dehydrogenase; Spider biofilm induced	0	0	NE
Plate 17	F11	2304	orf19.5986	THI4	C3_05130C_A	Thiamine biosynthetic enzyme precursor; repressed during the mating process; stationary phase enriched protein; Spider biofilm induced	0	0	NE
Plate 17	F12	1056	orf19.5752		C6_03780C_A	Ortholog(s) have ubiquitin-protein ligase activity, role in SCF-dependent proteasomal ubiquitin-dependent protein catabolic process and SCF ubiquitin ligase complex localization	0	0	NE
Plate 17	G01	2363	orf19.5747		C6_03730C_A	Ortholog(s) have structural constituent of ribosome activity and mitochondrial small ribosomal subunit localization	0	1.25	GD
Plate 17	G02	2443	orf19.3482		C6_02410W_A	Ortholog(s) have NAD+ diphosphatase activity, role in NADH metabolic process and cytosol, nucleus, peroxisome localization	0	0	NE
Plate 17	G03	2445	orf19.5862	AFP99	C3_04200W_A	Protein related to arginases; downregulated upon adherence to polystyrene; regulated by Gcn2p and Gcn4p	0	0	NE
Plate 17	G04	2451	orf19.4283		C5_02660C_A	Ortholog(s) have role in translational initiation and cytosol, eukaryotic 43S preinitiation complex, eukaryotic translation initiation factor 3 complex, eIF3e, eukaryotic translation initiation factor 3 complex, eIF3m, nucleus localization	0	3	E
Plate 17	G05	2456	orf19.3710	YHB5	CR_07810W_A	Flavohemoglobin-related protein; not required for normal NO resistance; predicted globin/FAD-binding/NAD(P)-binding domains but lacks some conserved residues of flavohemoglobins; filament induced; rat catheter and Spider biofilm induced	0	0	NE
Plate 17	G06	2465	orf19.6152		CR_07200W_A	Ortholog of C. parapsilosis CDC317 : CPAR2_205930, Candida tenuis NRRL Y-1498 : CANTEDRAFT_115846, Debaryomyces hansenii CBS767 : DEHA2E06072g and Candida dubliniensis CD36 : CD36_32830	0	0	NE
Plate 17	G07	1655	orf19.4630	CPA1	C4_01550C_A	Putative carbamoyl-phosphate synthase subunit; alkaline repressed; rat catheter, Spider and flow model biofilm induced	0	0	NE
Plate 17	G08	2192	orf19.7213		C1_14050C_A	Putative ATP-dependent RNA helicase; fungal-specific (no human or murine homolog)	0	0	NE
Plate 17	G09	2213	orf19.3249	LAG1	CR_01060W_A	Putative ceramide synthase component; Hap43p-repressed gene; amphotericin B repressed	0	0	NE
Plate 17	G10	1884	orf19.5641	CAR2	C4_00160C_A	Ornithine aminotransferase; arginine metabolism; alkaline induced; mutant sensitivite to toxic ergosterol analog, to amphotericin B; exponential and stationary phase yeast; flow model biofilm induced; rat catheter, Spider biofilm repressed	0	0	NE
Plate 17	G11	1934	orf19.4201	NHX1	C6_00570C_A	Protein similar to S. cerevisiae Nhx1p, which is an Na+/H+ exchanger required for intracellular sequestration of Na+	0	0	NE
Plate 17	G12	2582	orf19.354		C3_03560W_A	Ortholog(s) have aminopeptidase activity, role in protein processing, protein stabilization and extrinsic to mitochondrial inner membrane, nucleus localization	0	0	NE
Plate 17	H01	2584	orf19.4446		C1_07210C_A	Protein similar to ammomium permeases that is probably inactive, as a mep2 mep3 double homozygous null mutation abolishes cellular ammomium permease activity; fungal-specific (no human or murine homolog)	0	0	NE
Plate 17	H02	2586	orf19.6928	SAP9	C3_03870C_A	Secreted aspartyl protease; roles in adhesion, cell surface integrity; induced by antifungal drugs, stationary phase, or in white-phase cells; farnesol-downregulated in biofilm; autocatalytic processing; GPI-anchor; Spider biofilm induced	0	0	NE
Plate 17	H03	2603	orf19.4610		C4_01830C_A	Has domain(s) with predicted metallocarboxypeptidase activity and role in proteolysis	0	0	NE
Plate 17	H04	2605	orf19.7010		C7_01040C_A	Ortholog(s) have cytosol, ubiquitin ligase complex localization	0	0	NE
Plate 17	H05	2609	orf19.7218	RBE1	C1_14120C_A	Pry family cell wall protein; repressed by Rim101, Efg1, Ssn6, alkaline conditions; O-glycosylation; no GPI anchor predicted; ketoconazol induced; regulated by Sef1, Sfu1, Hap4; flow model biofilm induced; Spider biofilm repressed	0	0	NE
Plate 17	H06	2620	orf19.7336		CR_09390C_A	Predicted membrane transporter; member of the drug:proton antiporter (14 spanner) (DHA2) family, major facilitator superfamily (MFS); Spider biofilm induced	0	0.5	GD
Plate 17	H07	2623	orf19.7095		C7_00270W_A	Ortholog(s) have endoplasmic reticulum localization	0	0	NE
Plate 17	H08	2509	orf19.1415	FRE10	C4_04320W_A	Major cell-surface ferric reductase under low-iron conditions; 7 transmembrane regions and a secretion signal predicted; Tup1, Rim101, Ssn6, Hog1, caspofungin repressed; ciclopirox olamine induced; rat catheter biofilm induced	0	0	NE
Plate 17	H09	2512	orf19.1545		C2_02270C_A	Ortholog(s) have structural constituent of ribosome activity and mitochondrial small ribosomal subunit localization	0	3	E
Plate 17	H10	2540	orf19.524		CR_04350C_A	Ortholog(s) have role in mitotic sister chromatid segregation and cytosol, nucleus localization	0	0	NE
Plate 17	H11	2551	orf19.5656		C4_00290C_A	Has domain(s) with predicted 2 iron, 2 sulfur cluster binding, iron ion binding, oxidoreductase activity, oxidoreductase activity and acting on paired donors	0	0	NE
Plate 17	H12	2553	orf19.5661	PTC7	C4_00340W_A	Protein phosphatase, type 2C; has S/T phosphatase activity, Mn2+/Mg2+ dependent; predicted membrane-spanning segment and mitochondrion-targeting signal	0	0	NE
Plate 18	A01	2557	orf19.5673	OPT7	C4_00440C_A	Putative oligopeptide transporter; possibly transports GSH or related compounds; Hog1-induced; expression of OPT6, -7, or -8 does not suppress defect of mutant lacking OPT1-3; Hap43-repressed; F-12/CO2 early biofilm induced	0	0	NE
Plate 18	A02	2558	orf19.5677	DUR4	C4_00480W_A	Putative urea permease; fungal-specific (no human or murine homolog); possibly an essential gene, disruptants not obtained by UAU1 method	0	0	NE
Plate 18	A03	2565	orf19.5160		C7_03010W_A	Ortholog(s) have role in G1/S transition of mitotic cell cycle, TOR signaling cascade, dephosphorylation, regulation of chromosome segregation, tRNA wobble uridine modification and centromeric heterochromatin, cytosol, nucleus localization	0	0	NE
Plate 18	A04	2575	orf19.6886		C2_05750W_A	Ortholog(s) have rRNA binding activity, role in maturation of LSU-rRNA from tricistronic rRNA transcript (SSU-rRNA, 5.8S rRNA, LSU-rRNA), ribosomal large subunit export from nucleus and nucleolus localization	0	4	E
Plate 18	A05	2577	orf19.6900		C7_01180W_A	Ortholog(s) have role in mitochondrial genome maintenance, mitochondrion inheritance, phospholipid transport, protein import into mitochondrial outer membrane and ERMES complex, cytosol, nucleus localization	0	0.75	GD
Plate 18	A06	1798	orf19.2436		C1_06090C_A	Predicted protein serine/threonine kinase; Spider biofilm induced	0	0	NE
Plate 18	A07	1799	orf19.2438		C1_06070W_A	Ortholog(s) have mitochondrion, ribosome localization	0	3	E
Plate 18	A08	1802	orf19.4186	PCT1	C4_00570C_A	Putative choline-phosphate cytidylyl transferase, antigenic during human oral infection	0	0	NE
Plate 18	A09	1805	orf19.763		C1_04790W_A	Small subunit of the heterodimeric cap binding complex; component of the spliceosomal commitment complex; Spider biofilm repressed	0	0	NE
Plate 18	A10	1810	orf19.5224		C1_12410C_A	Putative serine/threonine protein kinase; predicted role in sphingolipid-mediated signaling pathway that controls endocytosis; mRNA binds She3 and is localized to hyphal tips	0	0	NE
Plate 18	A11	1812	orf19.685	YHM1	C6_01930W_A	Putative mitochondrial carrier protein; fungal-specific (no human or murine homolog); Hap43p-repressed gene	0	0	NE
Plate 18	A12	1816	orf19.3089		C4_07140W_A	Predicted mitochondrial intermembrane space protein; predicted role in phospholipid metabolism; rat catheter and Spider biofilm induced	0	0	NE
Plate 18	B01	1819	orf19.3463		C6_02230W_A	Putative GTPase; role in 60S ribosomal subunit biogenesis; Spider biofilm induced	0	3.5	E
Plate 18	B02	1821	orf19.4356	HGT3	CR_03850W_A	Putative glucose transporter of the major facilitator superfamily; the C. albicans glucose transporter family comprises 20 members; 12 probable membrane-spanning segments, extended C terminus; expressed in rich medium with 2% glucose	0	0	NE
Plate 18	B03	1823	orf19.2640	FUR1	C5_03390C_A	Uracil phosphoribosyltransferase; predicted tetrameric enzyme of pyrimidine salvage; mutations associated with flucytosine resistance in clade I clinical isolates; flucytosine, macrophage-induced protein; levels decrease in stationary phase	0	0	NE
Plate 18	B04	1842	orf19.1760	RAS1	C2_10210C_A	RAS signal transduction GTPase; regulates cAMP and MAP kinase pathways; role in hyphal induction, virulence, apoptosis, heat-shock sensitivity; nonessential; plasma membrane-localized; complements viability of S. cerevisiae ras1 ras2 mutant	0	0.5	GD
Plate 18	B05	1845	orf19.2601	HEM1	CR_02000C_A	Putative 5-aminolevulinate synthase; caspofungin repressed; induced by high iron, nitric oxide; regulated by Ssn6; Hap43-repressed; Spider biofilm induced	0	4	E
Plate 18	B06	1851	orf19.5550	MRT4	C6_02770W_A	Putative mRNA turnover protein; Hap43-induced; mutation confers hypersensitivity to tubercidin (7-deazaadenosine); rat catheter biofilm induced	0	0	NE
Plate 18	B07	1852	orf19.742	ALD6	C4_05130C_A	Putative aldehyde dehydrogenase; stationary phase enriched protein; expression regulated upon white-opaque switch; rat catheter biofilm induced; rat catheter and Spider biofilm induced	0	0	NE
Plate 18	B08	2407	orf19.4897		C1_10270C_A	Putative phosphatidylinositol transporter; Spider biofilm repressed	0	0	NE
Plate 18	B09	1103	orf19.4233	THR4	C5_02270W_A	Putative threonine synthase; protein present in exponential and stationary growth phase yeast cultures; Gcn4p-regulated; sumoylation target	0	3.5	E
Plate 18	B10	1946	orf19.6230		C1_06800W_A	Ortholog(s) have enzyme regulator activity, m7G(5')pppN diphosphatase activity	0	0	NE
Plate 18	B11	3428	orf19.6328		C6_00090W_A	Putative protein of the mitochondrial intermembrane space; predicted role in acetate utilization and gluconeogenesis; Spider biofilm repressed	0	0	NE
Plate 18	B12	2965	orf19.2998	TSR2	C1_03060C_A	Protein with a predicted role in pre-rRNA processing; repressed by prostaglandins	0	3.5	E
Plate 18	C01	1887	orf19.4375		CR_03760W_A	Ortholog(s) have S-adenosylmethionine-dependent methyltransferase activity, role in chromatin silencing at rDNA, nicotinamide metabolic process and cytosol localization	0	0	NE
Plate 18	C02	2392	orf19.1333	SNG3	C7_03420C_A	Putative membrane transporter; Hap43p-induced gene; mutation confers hypersensitivity to toxic ergosterol analog; shows colony morphology-related gene regulation by Ssn6p	0	0	NE
Plate 18	C03	1918	orf19.600	TRK1	CR_07960C_A	Potassium transporter; mediates K+ and Cl- influx; role in sensitivity to cationic antimicrobial peptides, not by direct uptake, possibly related to membrane permeability; contains 5' UTR intron; Spider biofilm induced	0	0	NE
Plate 18	C04	3297	orf19.956		C5_00330C_A	Ortholog(s) have role in fermentation and mitochondrion localization	0	0	NE
Plate 18	C05	3391	orf19.4569		C4_02210W_A	Ortholog of Debaryomyces hansenii CBS767 : DEHA2C14850g, Candida dubliniensis CD36 : CD36_42100, Pichia stipitis Pignal : PICST_52615 and Spathaspora passalidarum NRRL Y-27907 : SPAPADRAFT_58608	0	0	NE
Plate 18	C06	3252	orf19.6522		C7_01990C_A	Putative allantoate permease; Gcn4-regulated; Spider biofilm induced	0	0	NE
Plate 18	C07	1899	orf19.5495		C2_06320W_A	Putative RNA-binding protein; induced by alpha pheromone in SpiderM medium	0	0	NE
Plate 18	C08	1119	orf19.5517		C6_02480W_A	Similar to alcohol dehydrogenases; induced by benomyl treatment, nitric oxide; induced in core stress response; oxidative stress-induced via Cap1; Spider biofilm repressed	0	0	NE
Plate 18	C09	1162	orf19.4506	LYS22	C2_04460W_A	Putative homocitrate synthase; repressed by nitric oxide and by hypoxia; protein level decreases in stationary phase cultures; induced by ketoconazole, Spider biofilm induced	0	0	NE
Plate 18	C10	2939	orf19.6214	ATC1	C1_06940C_A	Cell wall acid trehalase; catalyzes hydrolysis of the disaccharide trehalose; similar to S. cerevisiae vacuolar acid trehalase (Ath1p); Hap43p-repressed gene	0	0	NE
Plate 18	C11	3441	orf19.2953	TOM20	C1_02640C_A	Putative mitochondrial primary import receptor	#N/A	#N/A	#N/A
Plate 18	C12	2987	orf19.1235	HOM3	C4_05540W_A	Putative L-aspartate 4-P-transferase; fungal-specific (no human or murine homolog); regulated by Gcn2 and Gcn4; early-stage flow model biofilm induced	0	3.5	E
Plate 18	D01	884	orf19.7298	CHS2	CR_09020C_A	Chitin synthase; nonessential; required for wild-type chitin deposition in hyphae; transcript regulated during dimorphic transition; Chs1 and Chs2, but not Chs3, are inhibited by the protoberberine HWY-289	0	0	NE
Plate 18	D02	926	orf19.2862	RIB1	CR_02990C_A	Putative GTP cyclohydrolase II; enzyme of riboflavin biosynthesis; fungal-specific (no human or murine homolog); regulated by Sef1p-, Sfu1p-, and Hap43p	0	4	E
Plate 18	D03	932	orf19.2534	PIN4	CR_01500W_A	Protein with similarity to S. cerevisiae Pin4p; transposon mutation affects filamentous growth	0	0	NE
Plate 18	D04	1009	orf19.4679	AGP2	C4_01100C_A	Amino acid permease; hyphal repressed; white-opaque switch regulated; induced in core caspofungin response, during cell wall regeneration, by flucytosine; regulated by Sef1, Sfu1, and Hap43; rat catheter and Spider biofilm induced	0	0	NE
Plate 18	D05	1058	orf19.3591	APE3	C2_08800C_A	Putative vacuolar aminopeptidase Y,; regulated by Gcn2 and Gcn4; rat catheter and Spider biofilm repressed	0	0	NE
Plate 18	D06	1062	orf19.1308		C4_03700W_A	Predicted membrane transporter, member of the drug:proton antiporter (14 spanner) (DHA2) family, major facilitator superfamily (MFS)	0	0	NE
Plate 18	D07	1096	orf19.2454	PHO87	C1_05940W_A	Putative phosphate permease; transcript repressed by Rim101 at pH 8; regulated by white-opaque switch; caspofungin repressed; virulence-group-correlated expression; flow model biofilm induced	0	0	NE
Plate 18	D08	1362	orf19.2821		CR_02620C_A	Protein of unknown function; Hap43-repressed gene; repressed by nitric oxide	0	0	NE
Plate 18	D09	1412	orf19.633		CR_04960C_A	Putative methyltransferase; decreased expression in hyphae compared to yeast; expression regulated during planktonic growth; flow model biofilm induced; Hap43-repressed gene	0	0	NE
Plate 18	D10	1512	orf19.3395		C6_01870C_A	Predicted MFS membrane transporter, member of the drug:proton antiporter (12 spanner) (DHA1) family; induced by nitric oxide, oxidative stress, alpha pheromone; fungal-specific; Hap43-repressed; Spider biofilm induced	0	0	NE
Plate 18	D11	1578	orf19.2964		C1_02750C_A	Ortholog(s) have DNA translocase activity	0	4	E
Plate 18	D12	1633	orf19.4633		C4_01510W_A	Ortholog(s) have carbonyl reductase (NADPH) activity, oxidoreductase activity, acting on the aldehyde or oxo group of donors, NAD or NADP as acceptor activity and cytosol, nucleus, ribosome localization	0	0	NE
Plate 18	E01	1980	orf19.785	FLC2	CR_07100W_A	Protein involved in heme uptake; putative FAD transporter, similar to S. cerevisiae Flc2p	0	0	NE
Plate 18	E02	1985	orf19.2693	GST2	C4_02990C_A	Glutathione S transferase; induced by benomyl and in populations of cells exposed to fluconazole over multiple generations; regulated by Nrg1, Tup1; induced by nitric oxide; stationary phase enriched; Spider biofilm induced	0	0	NE
Plate 18	E03	2125	orf19.6043		C1_00630W_A	Has domain(s) with predicted UDP-N-acetylmuramate dehydrogenase activity, flavin adenine dinucleotide binding activity and role in oxidation-reduction process	0	0	NE
Plate 18	E04	2174	orf19.5005	OSM2	C1_13670W_A	Putative mitochondrial fumarate reductase; regulated by Ssn6p, Gcn2p, and Gcn4p; Hog1p-downregulated; stationary phase enriched protein; Hap43p-repressed gene	0	0	NE
Plate 18	E05	2249	orf19.7397		C3_06150W_A	Ortholog(s) have sequence-specific DNA binding activity and cytoplasm, nucleus, spindle localization	0	0	NE
Plate 18	E06	2326	orf19.1658		C3_01890C_A	Ortholog(s) have cell cortex, cellular bud neck, mating projection tip localization	0	0	NE
Plate 18	E07	2556	orf19.5672	MEP2	C4_00430W_A	Ammonium permease and regulator of nitrogen starvation-induced filamentation; 11 predicted transmembrane regions; in low nitrogen cytoplasmic C-terminus activates Ras/cAMP and MAPK signal transduction pathways to induce filamentation	0	0	NE
Plate 18	E08	2561	orf19.3121	GST1	C4_06900W_A	Putative glutathione S-transferase; upregulated in the presence of human neutrophils; expression is regulated upon white-opaque switching; increased transcription is observed upon benomyl treatment	0	0	NE
Plate 18	E09	2646	orf19.6766		C3_07300W_A	Ortholog of S. cerevisiae Nop13; a nucleolar protein found in preribosomal complexes; Hap43-induced gene; rat catheter biofilm induced	0	0	NE
Plate 18	E10	2842	orf19.4802	FTH1	C1_09400C_A	Protein similar to S. cerevisiae Fth1p, a high affinity iron transporter for intravacuolar stores of iron; repressed by Sfu1p, amphotericin B, caspofungin; induced by alkaline pH, ciclopirox olamine; regulated by Sef1p, Sfu1p, and Hap43p	0	0	NE
Plate 18	E11	3219	orf19.355		C3_03570C_A	Has domain(s) with predicted oxidoreductase activity and role in oxidation-reduction process	0	0	NE
Plate 18	E12	1986	orf19.2703		C4_02920W_A	Specificity factor required for ubiquitination and sorting of specific cargo proteins at the multivesicular body; ortholog of S. cerevisiae Ear1; transcript regulated by iron; Ssr1-represssed; Spider biofilm induced	0	0	NE
Plate 18	F01	1023	orf19.6057		C1_00510W_A	Ortholog(s) have 3-methyl-2-oxobutanoate hydroxymethyltransferase activity, role in pantothenate biosynthetic process and mitochondrion localization	0	4	E
Plate 18	F02	1028	orf19.4475	KTR4	C1_04000C_A	Mannosyltransferase; induced during cell wall regeneration; fungal-specific (no human or murine homolog); Bcr1-repressed in RPMI a/a biofilms	0	0	NE
Plate 18	F03	2507	orf19.2007		C2_01170C_A	Ortholog(s) have role in Golgi to vacuole transport, ascospore wall assembly, retrograde transport, endosome to Golgi and GARP complex, mitochondrion localization	1.5	1.75	GD
Plate 18	F04	2777	orf19.3770	ARG8	C4_05070C_A	Putative acetylornithine aminotransferase; Gcn2, Gcn4 regulated; rat catheter biofilm induced; Spider biofilm induced	0	0	NE
Plate 18	F05	970	orf19.313	DAL4	C3_03140C_A	Putative allantoin permease; fungal-specific (no human or murine homolog)	0	0	NE
Plate 18	F06	2527	orf19.2771	BEM3	C4_02310W_A	Putative GTPase-activating protein (GAP) for Rho-type GTPase Cdc42p; involved in cell signaling pathways that control cell polarity; similar to S. cerevisiae Bem3p	0	0	NE
Plate 18	F07	2928	orf19.3208	DAL52	C5_01670W_A	Putative allantoate permease; mutant is viable; similar but not orthologous to S. cerevisiae Dal5	0	0	NE
Plate 18	F08	72	orf19.4705		C4_00880W_A	Ortholog(s) have tRNA adenylyltransferase activity, role in tRNA 3'-terminal CCA addition and cytosol, mitochondrial matrix localization	0	4	E
Plate 18	F09	896	orf19.1960	CLN3	C5_01100C_A	G1 cyclin; depletion abolishes budding and causes hyphal growth defects; farnesol regulated, functional in S. cerevisiae; possibly essential (UAU1 method); other biofilm induced; Spider biofilm induced	0	3	E
Plate 18	F10	980	orf19.137		C6_01300W_A	Putative transferase involved in phospholipid biosynthesis; induced by alpha pheromone in SpiderM medium	0	0	NE
Plate 18	F11	997	orf19.3649		C6_00760W_A	Ortholog(s) have adenyl-nucleotide exchange factor activity, role in cytoplasmic translation and cytosolic ribosome, nucleus localization	0	0	NE
Plate 18	F12	1000	orf19.7327	PHO88	CR_09320C_A	Protein with a role in phosphate transport; biofilm-regulated expression; amphotericin B repressed	0	0	NE
Plate 18	G01	1013	orf19.1364		C2_09870W_A	Ortholog of S. pombe Stm1 G-protein coupled receptor; PQ-loop domains; constitutive expression independent of MTL or white-opaque status; Hap43-repressed	0	0	NE
Plate 18	G02	1025	orf19.553		CR_04620C_A	Predicted membrane transporter, member of the drug:proton antiporter (12 spanner) (DHA1) family, major facilitator superfamily (MFS)	0	0	NE
Plate 18	G03	1032	orf19.5118	SDS24	C1_08370W_A	Protein similar to S. cerevisiae Sds24 involved in cell separation during budding; transcript regulated by Mig1 and Tup1; fluconazole-induced; flow model biofilm induced	0	0	NE
Plate 18	G04	1061	orf19.5869		C3_04260W_A	Ortholog(s) have role in metal ion transport, protein targeting to vacuole, ubiquitin-dependent protein catabolic process and endoplasmic reticulum, fungal-type vacuole membrane localization	0	0	NE
Plate 18	G05	1087	orf19.4548	MAK32	C1_01770W_A	Putative protein involved in the structural stability of L-A double-stranded RNA-containing particles; downregulated upon adherence to polystyrene	0	0	NE
Plate 18	G06	1125	orf19.3558		C2_05290C_A	Ortholog(s) have Golgi apparatus, endoplasmic reticulum localization	0	0	NE
Plate 18	G07	1155	orf19.7367	UBP1	C3_05870C_A	Ortholog(s) have ubiquitin-specific protease activity, role in protein deubiquitination and endoplasmic reticulum localization	0	0	NE
Plate 18	G08	1159	orf19.403	PCL2	C1_08570C_A	Cyclin homolog; reduced expression observed upon depletion of Cln3; farnesol regulated; periodic mRNA expression, peak at cell-cycle G1/S phase; Hap43-induced; rat catheter biofilm repressed	0	0	NE
Plate 18	G09	1587	orf19.52		C1_04980C_A	Ortholog(s) have role in cellular iron ion homeostasis and mitochondrion localization	0	0	NE
Plate 18	G10	2033	orf19.3139		C4_06710W_A	Putative NADP-dependent oxidoreductase; Hap43-repressed; induced by benomyl treatment; oxidative stress-induced via Cap1; rat catheter biofilm repressed	0	0	NE
Plate 18	G11	2239	orf19.7359	CRZ1	C3_05780C_A	Calcineurin-regulated C2H2 transcription factor; role in maintenance of membrane integrity, azole tolerance; not required for mouse virulence; repressed by low iron; regulates Ca++ influx during alkaline pH response; Spider biofilm induced	0	0	NE
Plate 18	G12	2272	orf19.7517	CHT1	CR_00180C_A	Chitinase; putative N-terminal catalytic domain; has secretory signal sequence; lacks S/T region and N-glycosylation motifs of Chs2p and Chs3p; alkaline downregulated; expression not detected in yeast-form or hyphal cells	0	0	NE
Plate 18	H01	2321	orf19.4769	IPT1	C1_09120W_A	Inositol phosphoryl transferase; catalyzes the synthesis of the most abundant sphingolipid, mannose-(inositol-P)2-ceramide, M(IP)2C, from MIPC; required for wild-type membrane localization of Cdr1; Spider biofilm induced	0	0	NE
Plate 18	H02	2745	orf19.3930	YUH2	C5_04430C_A	Putative ubiquitin C-terminal hydrolase; sumoylation target	0	0	NE
Plate 18	H03	2823	orf19.3415	PTK2	C6_01710C_A	Putative protein kinase of polyamine import; mutation confers hypersensitivity to high concentrations of tunicamycin; YPD flow model biofilm induced; rat catheter and Spider biofilm induced	0	0	NE
Plate 18	H04	2839	orf19.1699	BZZ1	C3_01500C_A	Protein similar to S. cerevisiae Bzz1p, which is an SH3 domain protein involved in the regulation of actin polymerization	0	0	NE
Plate 18	H05	2986	orf19.1236		C4_05550C_A	Ortholog(s) have role in endocytosis, establishment or maintenance of actin cytoskeleton polarity, vacuole organization and integral to Golgi membrane localization	0	0	NE
Plate 18	H06	3425	orf19.212	VPS28	C2_08940C_A	ESCRT I protein sorting complex subunit; involved in Rim8 processing and proteolytic activation of Rim101, which regulates pH response; role in echinocandin, azole sensitivity	0	0	NE
Plate 18	H07	3435	orf19.4183	MUC1	C4_00600C_A	Protein similar to S. cerevisiae Muc1; a cell surface glycoprotein involved in filamentous growth; repressed by benomyl treatment; mutant is viable	0	0	NE
Plate 18	H08	3483	orf19.5903	RAX1	C3_04490W_A	Protein with a predicted role in bud site selection; hypha-induced expression; Spider biofilm induced	0	0	NE
Plate 18	H09	3488	orf6.2225	MFG1	C2_08730W_A	Regulator of filamentous growth; required for biofilm formation, virulence; interacts with Flo8 and Mss11	0	0	NE
Plate 18	H10	3123	orf19.1555	SAC3	C2_02350C_A	Putative nuclear pore-associated protein, required for small ribosomal subunit biogenesis; possibly an essential gene, disruptants not obtained by UAU1 method	0	0.5	GD
Plate 18	H11	3507	orf19.6877	PNG2	C2_05660W_A	Putative peptide:N-glycanase; gene has variable numbers of 12-bp repeats; induced by caspofungin, ciclopirox olamine, ketoconazole or hypoxia; gene of core caspofungin response; Hap43-induced; Spider biofilm induced	0	0	NE
Plate 18	H12	504	orf19.2940		C1_02510W_A	Putative v-SNARE of the endoplasmic reticulum membrane; possibly an essential gene, disruptants not obtained by UAU1 method	#N/A	#N/A	#N/A
Plate 19	A01	240	orf19.3609	UTP15	C2_08670C_A	Small subunit (SSU) processome component; mutation confers resistance to 5-fluorocytosine (5-FC); physically interacts with TAP-tagged Nop1p	0	4	E
Plate 19	A02	167	orf19.979	FAS1	C5_00190C_A	Beta subunit of fatty-acid synthase; multifunctional enzyme; Hap43, fluconazole-induced; amphotericin B, caspofungin repressed; macrophage/pseudohyphal-induced; Spider biofilm repressed	0	4	E
Plate 19	A03	2915	orf19.1285		C5_04050W_A	Plasma membrane-localized protein of unknown function; Hap43p-repressed gene	0	0	NE
Plate 19	A04	2904	orf19.5816	EBP7	C2_02880C_A	Putative NADPH oxidoreductase; mutation confers hypersensitivity to toxic ergosterol analog; oxidative stress-induced via Cap1p	0	0	NE
Plate 19	A05	1098	orf19.4240		C5_02320C_A	Ortholog(s) have role in GPI anchor biosynthetic process, cellular manganese ion homeostasis and endoplasmic reticulum, fungal-type vacuole membrane localization	0	0	NE
Plate 19	A06	2669	orf19.1639		C3_02070C_A	Has domain(s) with predicted oxidoreductase activity and role in oxidation-reduction process	0	0	NE
Plate 19	A07	2550	orf19.6727	RIT1	C3_07620C_A	Putative initiator tRNA methionine ribosyltransferase; fungal-specific (no human or murine homolog)	0	0	NE
Plate 19	A08	2581	orf19.349		C3_03510C_A	Ortholog(s) have role in aerobic respiration, mRNA metabolic process and mitochondrial outer membrane localization	0	0	NE
Plate 19	A09	2648	orf19.7577	MSS51	CR_10010C_A	Putative mRNA maturation factor; fungal-specific (no human or murine homolog)	0	0	NE
Plate 19	A10	2675	orf19.1130		NA	Protein of unknown function; rat catheter biofilm repressed	#N/A	#N/A	#N/A
Plate 19	A11	2657	orf19.5925		C3_04650W_A	Ortholog of S. cerevisiae : AIM6, C. glabrata CBS138 : CAGL0C05533g, C. parapsilosis CDC317 : CPAR2_404550, Candida tenuis NRRL Y-1498 : CANTEDRAFT_115337 and Debaryomyces hansenii CBS767 : DEHA2G13552g	0	0	NE
Plate 19	A12	3336	orf19.7516		CR_00190W_A	Putative glycoside hydrolase; Hap43-induced gene	0	0	NE
Plate 19	B01	2978	orf19.4211	FET3	C6_00480C_A	Multicopper oxidase; for growth in low iron, prostaglandin E2 synthesis; ketoconazole/caspofungin/amphotericin B repressed; Sef1/Sfu1/Hap43 regulated; reports differ if functional homolog of ScFet3; rat catheter and Spider biofilm induced	0	0	NE
Plate 19	B02	2942	orf19.4760		C1_09040C_A	Putative protein-histidine N-methyltransferase; Spider biofilm induced	0	0	NE
Plate 19	B03	2993	orf19.216		C2_08910C_A	Protein with a metallo-dependent phosphatase domain; ketoconazole-induced; upregulation correlates with clinical development of fluconazole resistance	0	0	NE
Plate 19	B04	1930	orf19.5849	CWT1	CR_05530C_A	Zn2Cys6 transcription factor involved in negative regulation of nitrosative stress response; mutant has cell wall defects; transcription increased at stationary phase; has predicted PAS domain; similar to S. cerevisiae Rds2p	0	0	NE
Plate 19	B05	1952	orf19.2423	ZCF11	CR_03050C_A	Zn(II)2Cys6 transcription factor; required for wild-type filamentous growth; mRNA binds She3	0	0	NE
Plate 19	B06	2023	orf19.991	DJP1	C1_10480W_A	Similar to bacterial DnaJ; reported to have a role in peroxisome biogenesis; induced in low iron and upon adherence to polystyrene	0	0	NE
Plate 19	B07	3382	orf19.1493	RAD7	C2_01840C_A	Protein similar to S. cerevisiae Rad7p, which is a subunit of the Nucleotide Excision Repair Factor 4; induced under hydroxyurea treatment	0	0	NE
Plate 19	B08	3360	orf19.5978		C3_05080W_A	Has domain(s) with predicted nucleotide binding, oxidoreductase activity, zinc ion binding activity and role in oxidation-reduction process	0	0	NE
Plate 19	B09	3160	orf19.4546	HOL4	C1_01780C_A	Putative ion transporter; alkaline induced by Rim101; Plc1-regulated; caspofungin repressed; rat catheter and Spider biofilm induced	0	0	NE
Plate 19	B10	1231	orf19.1799	GAP5	C4_05430C_A	Putative general amino acid permease; fungal-specific (no human or murine homolog)	0	0	NE
Plate 19	B11	1367	orf19.4287		C5_02690W_A	Putative oxidoreductase; Hap43-repressed gene; clade-associated gene expression	0	0	NE
Plate 19	B12	1369	orf19.5592		C6_03090W_A	Ortholog of Candida tenuis NRRL Y-1498 : CANTEDRAFT_115187, Candida dubliniensis CD36 : CD36_63980, Candida tropicalis MYA-3404 : CTRG_02719 and Candida albicans WO-1 : CAWG_05060	0	0	NE
Plate 19	C01	1403	orf19.1171		C1_11490C_A	Ortholog of C. parapsilosis CDC317 : CPAR2_208080, Candida tenuis NRRL Y-1498 : CANTEDRAFT_120956, Debaryomyces hansenii CBS767 : DEHA2F24508g and Candida dubliniensis CD36 : CD36_10780	0	0	NE
Plate 19	C02	1469	orf19.6449		CR_08720W_A	Ortholog of Candida dubliniensis CD36 : CD36_34310	0	0	NE
Plate 19	C03	1641	orf19.3929		C5_04420W_A	Ortholog(s) have mitochondrion localization	0	0	NE
Plate 19	C04	1659	orf19.5749	SBA1	C6_03750C_A	Similar to co-chaperones; induced in high iron; farnesol-, heavy metal (cadmium) stress-induced; protein level decreases in stationary phase cultures; Hap43-repressed	0	0	NE
Plate 19	C05	2153	orf19.6398		CR_08310C_A	S. pombe ortholog SPBC460.04c is a predicted sulfonate/alpha-ketoglutare dioxygenase; induced by nitric oxide; Spider biofilm induced	0	0	NE
Plate 19	C06	1700	orf19.125	EBP1	C6_01180C_A	NADPH oxidoreductase; interacts with phenolic substrates (17beta-estradiol); possible role in estrogen response; induced by oxidative, weak acid stress, NO, benomyl, GlcNAc; Cap1, Mnl1 induced; Hap43-repressed; rat catheter biofilm induced	0	0	NE
Plate 19	C07	1738	orf19.4060	ARO4	C1_05110C_A	3-deoxy-D-arabinoheptulosonate-7-phosphate synthase; aromatic amino acid biosynthesis; GCN-regulated; feedback-inhibited by tyrosine if produced in S. cerevisiae Aro3p and Aro4p catalyze same reaction; protein decreases in stationary phase	0	0	NE
Plate 19	C08	1978	orf19.2151	NAG6	C6_04570W_A	Protein required for wild-type mouse virulence and wild-type cycloheximide resistance; putative GTP-binding motif; similar to S. cerevisiae Yor165Wp; in gene cluster that encodes enzymes of GlcNAc catabolism; no human or murine homolog	0	0	NE
Plate 19	C09	1784	orf19.1823		C1_06270W_A	Predicted membrane protein; transcript repressed by ciclopirox olamine	0	0	NE
Plate 19	C10	1966	orf19.6166		C3_00890C_A	Has domain(s) with predicted hydrolase activity, acting on ester bonds activity and role in lipid catabolic process	0	0	NE
Plate 19	C11	2180	orf19.7158		C7_04160W_A	Protein of allantoate permease family; fungal-specific (no human or murine homolog); Hap43p-repressed gene	0	0	NE
Plate 19	C12	2699	orf19.857	FMO2	C2_03610W_A	Protein with a monooxygenase domain; Spider biofilm induced	0	0	NE
Plate 19	D01	2263	orf19.5455		C3_00170C_A	Ortholog(s) have mRNA binding, small GTPase regulator activity	0	0	NE
Plate 19	D02	2960	orf19.2681	RBT7	C4_03100W_A	Protein with similarity to RNase T2 enzymes; has putative secretion signal; expression is Tup1-repressed	0	0	NE
Plate 19	D03	2963	orf19.5780		C2_03150C_A	Putative protein of unknown function; Hap43p-repressed gene	0	0	NE
Plate 19	D04	2982	orf19.5859	DAL8	C3_04160W_A	Putative allantoate permease; fungal-specific (no human or murine homolog)	0	0	NE
Plate 19	D05	2979	orf19.4210		C6_00490W_A	Ortholog(s) have phospholipase A2 activity, role in cardiolipin acyl-chain remodeling and mitochondrion localization	0	0	NE
Plate 19	D06	2736	orf19.4688	DAG7	C4_01010C_A	Secretory protein; a-specific, alpha-factor induced; mutation confers hypersensitivity to toxic ergosterol analog; fluconazole-induced; induced during chlamydospore formation in C. albicans and C. dubliniensis	0	0	NE
Plate 19	D07	3042	orf19.1663	MNT2	C3_01830C_A	Alpha-1,2-mannosyl transferase; adds 3rd mannose in cell-wall mannoprotein biosynthesis; partially redundant with Mnt1; role in adherence and virulence; expressed in yeast and hyphae; fungal-specific; Hap43-induced; Spider biofilm induced	0	0	NE
Plate 19	D08	2799	orf19.105	HAL22	C6_01030W_A	Putative phosphoadenosine-5'-phosphate or 3'-phosphoadenosine 5'-phosphosulfate phosphatase; possible role in sulfur recycling; Hap43-repressed; F-12/CO2 biofilm induced	0	0	NE
Plate 19	D09	2929	orf19.3203	RCY1	C5_01720C_A	Putative F-box protein involved in endocytic membrane traffic and/or recycling; fungal-specific (no human or murine homolog)	0	0	NE
Plate 19	D10	2940	orf19.56	ARG2	C1_05020C_A	Putative enzyme of arginine biosynthesis; transcription of genes of arginine biosynthesis pathway, except for ARG2, is induced upon phagocytosis by macrophage	0	0	NE
Plate 19	D11	3058	orf19.4171		C4_00710W_A	Has domain(s) with predicted ATP binding activity	0	0	NE
Plate 19	D12	2457	orf19.1583		C2_02570W_A	Predicted membrane transporter; member of the drug:proton antiporter (12 spanner) (DHA1) family, major facilitator superfamily (MFS); mRNA binds She3	0	0	NE
Plate 19	E01	1959	orf19.4142		C5_01470C_A	Putative transporter; decreased transcription is observed upon fluphenazine treatment	0	0	NE
Plate 19	E02	1981	orf19.6185		C3_07910W_A	Putative pseudouridine-5'-phosphate glycosidase; overlaps orf19.6186 and orf19.6187; Spider biofilm repressed	0	0	NE
Plate 19	E03	2011	orf19.592		CR_08040W_A	Ortholog of S. cerevisiae YNL092W and S. pombe SPBC1778.07; a putative N2227-like methyltransferase; Hap43-repressed gene	0	0	NE
Plate 19	E04	2200	orf19.7247	RIM101	C1_14340C_A	Transcription factor; alkaline pH response; required for alkaline-induced hyphal growth; role in virulence in mice; activated by C-terminal proteolytic cleavage; mediates both positive and negative regulation; Spider biofilm induced	0	0	NE
Plate 19	E05	2323	orf19.183	HIS3	C2_04810W_A	Imidazoleglycerol-phosphate dehydratase, enzyme of histidine biosynthesis; functionally complements S. cerevisiae his3-1 mutation; hyphal-induced expression; regulated by Gcn2p and Gcn4p; fungal-specific (no human or murine homolog)	0	0	NE
Plate 19	E06	2325	orf19.238	CCP1	C3_02480C_A	Similar to cytochrome-c peroxidase N terminus; repressed by Rim101 or alkaline pH; transcript induced by interaction with macrophage or low iron; oxygen-induced activity; regulated by Sef1, Sfu1, and Hap43; Spider biofilm induced	0	0	NE
Plate 19	E07	2342	orf19.3151		C2_06710W_A	Has domain(s) with predicted catalytic activity, coenzyme binding, nucleotide binding activity and role in cellular metabolic process	0	0	NE
Plate 19	E08	3341	orf19.6772	EMC29	C3_07260C_A	Putative scaffold protein; assists in association of the proteasome core particle with the regulatory particle; ortholog of S. cerevisiae Ecm29; transposon mutation affects filamentous growth; flow model biofilm repressed	0	0	NE
Plate 19	E09	3389	orf19.1946		C5_01230C_A	Similar to an aldose 1-epimerase-related protein; antigenic during murine systemic infection; protein present in exponential and stationary phase yeast cultures; Hap43-induced; Spider biofilm repressed	0	0	NE
Plate 19	E10	3376	orf19.5615	AYR2	C6_03270C_A	Putative NADPH-dependent 1-acyl dihydroxyacetone phosphate reductase; shows colony morphology-related gene regulation by Ssn6p	0	0	NE
Plate 19	E11	3333	orf19.7475	PHO81	CR_00590W_A	Protein involved in regulation of hyphal development; required for response to farnesoic acid; possibly adherence-induced	0	0	NE
Plate 19	E12	3361	orf19.5971		C3_05020W_A	Ortholog of S. cerevisiae : MTC6, C. glabrata CBS138 : CAGL0I01892g, C. parapsilosis CDC317 : CPAR2_405620, Candida tenuis NRRL Y-1498 : CANTEDRAFT_99433 and Debaryomyces hansenii CBS767 : DEHA2B14432g	0	0	NE
Plate 19	F01	3295	orf19.7257		C1_14400C_A	Ortholog(s) have role in mismatch repair, reciprocal meiotic recombination and MutLbeta complex localization	0	0	NE
Plate 19	F02	3404	orf19.2563		CR_01700C_A	Ortholog(s) have U6 snRNA binding activity, role in assembly of spliceosomal tri-snRNP, spliceosomal complex assembly and U6 snRNP localization	0	4	E
Plate 19	F03	3371	orf19.5894		C3_04440C_A	Ortholog of S. cerevisiae : YEL023C, C. glabrata CBS138 : CAGL0I03168g, Candida tenuis NRRL Y-1498 : CANTEDRAFT_101635, Candida dubliniensis CD36 : CD36_84380 and Pichia stipitis Pignal : PICST_19384	0	0	NE
Plate 19	F04	3402	orf19.4743	AFG1	C1_08850C_A	Putative mitochondrial ATPase of the AAA family; similar but not orthologous to S. cerevisiae Afg1; mutant is viable; regulated by Sef1, Sfu1, and Hap43	0	0	NE
Plate 19	F05	3126	orf19.1641		C3_02060W_A	Ortholog(s) have cytosol, nucleus localization	0	0	NE
Plate 19	F06	2826	orf19.4351	PRP13	CR_03810W_A	Putative integral inner mitochondrial membrane protein with similarity to exonucleases	0	0	NE
Plate 19	F07	3411	orf19.4771		C1_09130W_A	Protein of unknown function; Spider biofilm induced	0	0	NE
Plate 19	F08	3354	orf19.7650	LTV1	CR_10650W_A	Putative GSE complex component; repressed by prostaglandins	0	0.6	GD
Plate 19	F09	3292	orf19.7219	FTR1	C1_14130W_A	High-affinity iron permease; required for mouse virulence, low-iron growth; iron, amphotericin B, caspofungin, ciclopirox, Hog1p, Sef1p, Sfu1p, and Hap43p regulated; complements S. cerevisiae ftr1 iron transport; Hap43p-repressed	0	0	NE
Plate 19	F10	3395	orf19.4424	PHO100	C1_07430W_A	Putative inducible acid phosphatase; DTT-extractable and observed in culture supernatant in low-phosphate conditions; slight effect on murine virulence; virulence-group-correlated expression; N-glycosylated; F-12/CO2 early biofilm induced	0	0	NE
Plate 19	F11	3405	orf19.835		C2_03900C_A	Ortholog(s) have role in nucleosome mobilization and Ino80 complex localization	0	0	NE
Plate 19	F12	1059	orf19.733		CR_07160C_A	Ortholog(s) have endoplasmic reticulum localization	0	0	NE
Plate 19	G01	1389	orf19.1345	LIP8	C7_03300C_A	Secreted lipase, member of a differentially expressed lipase gene family with possible roles in nutrition and/or in creating an acidic microenvironment; LIP5 and LIP8 are expressed at all stages of both mucosal and systemic infection	0	0	NE
Plate 19	G02	1666	orf19.1142		C1_11750W_A	Putative vacuolar transporter of large neutral amino acids; induced by alpha pheromone in SpiderM medium	0	0	NE
Plate 19	G03	1720	orf19.1193	GNP1	C6_00330C_A	Similar to asparagine and glutamine permease; fluconazole, caspofungin induced; regulated by Nrg1, Mig1, Tup1, Gcn2, Gcn4, and alkaline regulated by Rim101; repressed during chlamydospore formation; rat catheter, flow model biofilm induced	0	0	NE
Plate 19	G04	1815	orf19.2798		C1_07470C_A	Putative helicase; fungal-specific (no human or murine homolog)	0	0	NE
Plate 19	G05	2266	orf19.7486	MRPL6	CR_00480W_A	Putative mitochondrial ribosomal protein	0	2	GD
Plate 19	G06	3346	orf19.6747		C3_07430W_A	Ortholog(s) have acid phosphatase activity, role in dephosphorylation, intracellular sterol transport and cytoplasm, nucleus localization	0	2	GD
Plate 19	G07	3417	orf19.4376		CR_03780C_A	Protein of unknown function; Spider biofilm induced	0	0	NE
Plate 19	G08	3352	orf19.7629		CR_10510W_A	Ortholog(s) have Seh1-associated complex, cytosol, extrinsic to fungal-type vacuolar membrane, ribosome localization	0	0	NE
Plate 19	G09	3091	orf19.6096	TRP1	C1_00120C_A	Phosphoribosylanthranilate isomerase; tryptophan biosynthesis; expected unifunctional, unlike trifunctional enzyme of some other fungi; complements E. coli trpC, S. cerevisiae trp1 mutant; CCT1 and TRP1 overlap; Spider biofilm repressed	1.5	1	GD
Plate 19	G10	3407	orf19.2385	KTI12	CR_03370C_A	Protein similar to S. cerevisiae Kti12p, which associates with Elongator complex; has a role in resistance to killer toxin; predicted Kex2p substrate; Hap43p-induced gene	0	0	NE
Plate 19	G11	3383	orf19.851		C2_03690C_A	Protein of unknown function; repressed by Rim101; negatively modulates intracellular ATP levels during the development of azole resistance; induced by Ca(2+) in a calcineurin-dependent manner; Spider biofilm induced	0	0	NE
Plate 19	G12	3436	orf19.2496	ATO2	C3_00930W_A	Putative fungal-specific transmembrane protein; fluconazole repressed, Hap43-repressed; flow model biofilm induced; Spider biofilm induced	0	0	NE
Plate 19	H01	3406	orf19.2391		CR_03330W_A	Putative protein of unknown function; Hap43p-repressed gene; S. cerevisiae ortholog YKR023W localizes to mitochondria	0	0	NE
Plate 19	H02	3312	orf19.7111		C7_00120W_A	Putative mitochondrial outer membrane protein membrane fission effector; possibly an essential gene, disruptants not obtained by UAU1 method	0	0	NE
Plate 19	H03	3381	orf19.457		CR_05980W_A	Ortholog(s) have ubiquitin-specific protease activity, role in protein deubiquitination, ubiquitin-dependent protein catabolic process via the multivesicular body sorting pathway and cytosol localization	0	0	NE
Plate 19	H04	3423	orf19.2996		C1_03050W_A	Ortholog(s) have role in fungal-type cell wall organization and cytoplasm localization	0	0	NE
Plate 19	H05	3460	orf19.6061		C1_00470C_A	Ortholog(s) have role in N-acylethanolamine metabolic process, N-acylphosphatidylethanolamine metabolic process and integral to mitochondrial inner membrane localization	0	0	NE
Plate 19	H06	958	orf19.1063		C1_04280C_A	Ortholog(s) have dolichyl-phosphate-mannose-glycolipid alpha-mannosyltransferase activity, role in GPI anchor biosynthetic process and integral to endoplasmic reticulum membrane, mannosyltransferase complex, mitochondrion localization	0	0	NE
Plate 19	H07	2881	orf19.764		C1_04780C_A	Ortholog(s) have clathrin-coated vesicle, cytoplasm localization	0	0	NE
Plate 19	H08	2834	orf19.795	VPS36	C2_04250W_A	ESCRT II protein sorting complex subunit; involved in Rim8 processing and proteolytic activation of Rim101, which regulates pH response; role in uptake of Histatin-5 into vacuole	0	0	NE
Plate 19	H09	2844	orf19.4560	BFR1	C4_02270C_A	Protein involved in the maintenance of normal ploidy; S. cerevisiae ortholog cofers Brefeldin A resistance; stationary phase enriched protein; Spider biofilm repressed	0	0	NE
Plate 19	H10	2838	orf19.1698		C3_01510W_A	Ortholog(s) have role in actin cytoskeleton organization and actin cortical patch localization	0	0	NE
Plate 19	H11	1111	orf19.3705	PTC6	CR_07770C_A	Mitochondrial protein phosphatase of the Type 2C-related family (serine/threonine-specific), functional homolog of S. cerevisiae Ptc6p; mutant shows virulence defect	0	0	NE
Plate 19	H12	1515	orf19.4779		C1_09210C_A	Putative transporter; slightly similar to the Sit1p siderophore transporter; Gcn4p-regulated; fungal-specific; induced by Mnl1p under weak acid stress	0	0	NE
Plate 20	A01	2887	orf19.2791	BBC1	C1_07540C_A	Putative SH3-domain-containing protein	0	0	NE
Plate 20	A02	3155	orf19.2945	PUT4	C1_02570C_A	Putative proline permease; fungal-specific (no human or murine homolog); repressed during the mating process	0	0	NE
Plate 20	A03	2903	orf19.5103		C1_08240C_A	Protein with a predicted phosphoglycerate mutase family domain; Hap43-repressed; clade-associated gene expression; induced by hypoxia	0	0	NE
Plate 20	A04	2851	orf19.4326		C5_03010W_A	Ortholog(s) have role in mRNA cis splicing, via spliceosome, maturation of 5S rRNA and U4/U6 x U5 tri-snRNP complex localization	0	4	E
Plate 20	A05	3227	orf19.6956	DAL9	C3_03640W_A	Putative allantoate permease; fungal-specific (no human or murine homolog)	0	0	NE
Plate 20	A06	3302	orf19.5307	JEN2	C4_04030W_A	Dicarboxylic acid transporter; regulated by glucose repression; induced by Rgt1; disruptants not obtained by UAU1 method; rat catheter and Spider biofilm induced	0	0	NE
Plate 20	A07	2739	orf19.3458		C6_02180W_A	Ortholog(s) have role in late endosome to vacuole transport via multivesicular body sorting pathway, protein targeting to vacuole and Golgi apparatus, Vps55/Vps68 complex, fungal-type vacuole membrane, mitochondrion localization	0	0	NE
Plate 20	A08	3038	orf19.2977	MIA40	C1_02880C_A	Predicted component of the mitochondrial intermembrane space import machinery; Hap43p-repressed gene	0	3	E
Plate 20	A09	2992	orf19.3910		C5_04260W_A	Has domain(s) with predicted RNA binding, ribonuclease T2 activity	0	0	NE
Plate 20	A10	3031	orf19.1847	ARO10	CR_06860C_A	Aromatic decarboxylase; Ehrlich fusel oil pathway of aromatic alcohol biosynthesis; alkaline repressed; protein abundance affected by URA3 expression in CAI-4 strain; Spider biofilm induced	0	0	NE
Plate 20	A11	3025	orf19.2309		C1_11070W_A	Protein with a predicted role in 5'-end processing of mitochondrial RNAs; ortholog of S. cerevisiae Pet127; Hap43-induced; rat catheter and Spider biofilm induced	0	0	NE
Plate 20	A12	3104	orf19.5071	NRP1	C1_08000W_A	Ortholog(s) have cytoplasmic stress granule, nucleolus localization	0	0	NE
Plate 20	B01	2711	orf19.4783		C1_09240C_A	Protein of unknown function; induced during chlamydospore formation in both C. albicans and C. dubliniensis	0	0	NE
Plate 20	B02	3053	orf19.23	RTA3	C2_06460W_A	Similar to S. cerevisiae Rta1 (role in 7-aminocholesterol resistance) and Rsb1 (flippase); putative drug-responsive regulatory site; induced by fluphenazine, estradiol, ketoconazole, caspofungin; rat catheter biofilm induced	0	0	NE
Plate 20	B03	3000	orf19.4151	SPO1	C5_01570C_A	Protein similar to phospholipase B; fungal-specific (no human or murine homolog)	0	0	NE
Plate 20	B04	3002	orf19.4136	YBL053	C5_01460W_A	Ortholog(s) have protein heterodimerization activity	0	1	GD
Plate 20	B05	1713	orf19.3417	ACF2	C6_01690W_A	Putative endo-1,3-beta-glucanase; fungal-specific (no human or murine homolog)	0	0	NE
Plate 20	B06	1785	orf19.1170	ARO7	C1_11500C_A	Putative chorismate mutase; fungal-specific (no human or murine homolog); alkaline upregulated	0	4	E
Plate 20	B07	1803	orf19.4187		C4_00560C_A	Ortholog(s) have role in mitochondrial genome maintenance, phospholipid transport, protein import into mitochondrial outer membrane and ERMES complex, integral to endoplasmic reticulum membrane localization	0	3	E
Plate 20	B08	1751	orf19.1160		C1_11600W_A	Ortholog(s) have COPII adaptor activity and role in ER to Golgi vesicle-mediated transport, fungal-type cell wall organization, protein glycosylation, protein retention in Golgi apparatus	0	0	NE
Plate 20	B09	3443	orf19.5662	PEP7	C4_00350W_A	Vesicle transport protein; acts in endosomal transport; roles in metal ion resistance, virulence, adhesion, hyphal growth, chlamydospore formation; similar to S. cerevisiae Pep7p	0	0	NE
Plate 20	B10	1834	orf19.2942	DIP5	C1_02530C_A	Dicarboxylic amino acid permease; mutation confers hypersensitivity to toxic ergosterol analog; induced upon phagocytosis by macrophage; Gcn4-regulated; upregulated by Rim101 at pH 8; rat catheter and Spider biofilm induced	0	0	NE
Plate 20	B11	1830	orf19.6020		C1_00860W_A	Ortholog(s) have Atg8 ligase activity and role in C-terminal protein lipidation, CVT pathway, autophagic vacuole assembly, cellular response to nitrogen starvation, mitochondrion degradation, piecemeal microautophagy of nucleus	0	0	NE
Plate 20	B12	1791	orf19.3966	CRH12	C5_04800W_A	CRH family cell wall protein; transcript regulated by Nrg1 and Tup1; alkaline induced by Rim101; repressed during cell wall regeneration; flow model biofilm induced	0	0	NE
Plate 20	C01	1827	orf19.3689		C1_02320C_A	Putative protein similar to 6-phosphofructo-2-kinase/fructose-2,6-bisphosphatase; expression downregulated in an ssr1 null mutant	0	0	NE
Plate 20	C02	3440	orf19.658	GIN1	C1_11440C_A	Protein involved in regulation of DNA-damage-induced filamentous growth; putative component of DNA replication checkpoint; ortholog of S. cerevisiae Mrc1p, an S-phase checkpoint protein; Hap43p-induced gene	0	0.75	GD
Plate 20	C03	1756	orf19.4312		C5_02900W_A	Ortholog(s) have TBP-class protein binding, transcription cofactor activity	0.5	0.75	GD
Plate 20	C04	1731	orf19.4494	KTR2	C2_04560W_A	Mannosyltransferase; transcription elevated in chk1, nik1, and sln1 homozygous null mutants; fungal-specific (no human or murine homolog); possibly an essential gene, disruptants not obtained by UAU1 method	0	0	NE
Plate 20	C05	1840	orf19.3920		C5_04340W_A	Ortholog(s) have protein disulfide isomerase activity, protein disulfide oxidoreductase activity, role in protein folding and fungal-type vacuole localization	0	0	NE
Plate 20	C06	1689	orf19.5228	RIB3	C1_12360C_A	3,4-Dihydroxy-2-butanone 4-phosphate synthase; homodimeric enzyme of riboflavin biosynthesis; converts ribulose 5-phosphate to L-3,4-dihydroxy-2-butanone 4-phosphate; transcription regulated on yeast-hyphal switch, macrophage interaction	0	0	NE
Plate 20	C07	1750	orf19.1159		C1_11610C_A	Protein similar to A. nidulans CysA serine O-trans-acetylase; suggests that C. albicans uses an O-acetyl-serine (OAS) pathway of sulfur assimilation; F-12/CO2 early biofilm induced; Spider biofilm induced	0	0	NE
Plate 20	C08	2429	orf19.5496	AVT1	C2_06330C_A	Putative vacuolar transporter; promoter bound by a1p and alpha2p by ChIP-chip analysis	0	0	NE
Plate 20	C09	2415	orf19.2198	FLC3	C2_07830W_A	Protein involved in heme uptake; putative FAD transporter, similar to S. cerevisiae Flc3p	0	0	NE
Plate 20	C10	2450	orf19.2411		CR_03140C_A	Putative endosomal SNARE; role in protein transport; rat catheter and Spider biofilm induced	0	0	NE
Plate 20	C11	2068	orf19.1449		C2_01450C_A	Protein of unknown function; induced in azole-resistant strain that overexpresses MDR1; protein present in exponential and stationary growth phase yeast cultures; Spider biofilm induced	0	0	NE
Plate 20	C12	1955	orf19.234	PHA2	C3_02460C_A	Putative prephenate dehydratase; Hap43p-repressed gene; expression downregulated in an ssr1 null mutant	0	0	NE
Plate 20	D01	2021	orf19.983		C1_10420C_A	Ortholog(s) have ubiquitin protein ligase binding activity, role in ubiquitin-dependent endocytosis and Golgi apparatus, clathrin-coated vesicle, cytosol, nucleus, plasma membrane localization	0	0	NE
Plate 20	D02	1967	orf19.6167	AYR1	C3_00900C_A	Putative oxidoreductase; transcriptionally induced by interaction with macrophage	0	0	NE
Plate 20	D03	1976	orf19.6202	RBT4	C1_07030C_A	Pry family protein; required for virulence in mouse systemic/rabbit corneal infections; not filamentation; mRNA binds She3, is localized to hyphal tips; Hap43-induced; in both yeast and hyphal culture supernatants; Spider biofilm induced	0	0	NE
Plate 20	D04	1862	orf19.2347	MNN2	C1_10720C_A	Alpha-1,2-mannosyltransferase; similar to S. cerevisiae Mnn2; role in cell wall integrity, temperature sensitivity; iron utilization in low iron; Tn mutation affects filamentous growth; filament induced; increased chitin exposes beta-glucan	0	0	NE
Plate 20	D05	1963	orf19.1363		C2_09880C_A	Putative protein of unknown function; Plc1-regulated; transcript induced by Mnl1 under weak acid stress; flow model, rat catheter, Spider biofilm induced	0	0	NE
Plate 20	D06	2416	orf19.2197		C2_07840W_A	Has domain(s) with predicted N,N-dimethylaniline monooxygenase activity, NADP binding, flavin adenine dinucleotide binding activity and role in oxidation-reduction process	0	0	NE
Plate 20	D07	2405	orf19.1381		C2_09710C_A	Ortholog of S. cerevisiae/S. pombe Lsb5; predicted role in actin cortical patch localization, actin filament organization, endocytosis; flow model biofilm induced; Spider biofilm repressed	0	0	NE
Plate 20	D08	2459	orf19.6297		C5_01610W_A	Ortholog(s) have pseudouridine synthase activity, role in tRNA pseudouridine synthesis and cytosol, nucleus localization	0	0	NE
Plate 20	D09	2408	orf19.1832	FCY23	C1_10610W_A	Putative transporter; Gcn4p-regulated; more similar to S. cerevisiae Tpn1p, which is a vitamin B6 transporter, than to purine-cytosine permeases	0	0	NE
Plate 20	D10	2077	orf19.6905		C7_01230C_A	Ortholog of S. cerevisiae : YNL011C, C. glabrata CBS138 : CAGL0H03619g, C. parapsilosis CDC317 : CPAR2_300420 and Candida tenuis NRRL Y-1498 : CANTEDRAFT_111980	0	0	NE
Plate 20	D11	1903	orf19.2583	PTR2	CR_01830C_A	Oligopeptide transporter involved in uptake of di-/tripeptides; highly induced during chlamydospore formation in both C. albicans and C. dubliniensis	0	0	NE
Plate 20	D12	1923	orf19.5789	ADE8	C2_03090C_A	Putative phosphoribosylglycinamide formyl-transferase, enzyme of amino acid biosynthesis pathway; upregulated in biofilm; S. cerevisiae ortholog is Gcn4p regulated; protein enriched in stationary phase yeast-form cultures	0	0	NE
Plate 20	E01	1904	orf19.5064	MRPL3	C1_07910C_A	Ribosomal protein of the large subunit, mitochondrial; repressed in core stress response; protein present in exponential and stationary growth phase yeast cultures	0	3.5	E
Plate 20	E02	1882	orf19.304		C3_03070W_A	Putative transporter similar to MDR proteins; fungal-specific; Spider biofilm induced	0	0	NE
Plate 20	E03	2261	orf19.5437	RHR2	C3_00320W_A	Glycerol 3-phosphatase; roles in osmotic tolerance, glycerol accumulation in response to salt; Spider/flow model biofilm induced; regulated by macrophage, stress, yeast-hyphal switch, pheromone, Gcn4, Hog1, Nrg1, Tup1	0	0	NE
Plate 20	E04	2315	orf19.5906	ADE2	C3_04520C_A	Phosphoribosylaminoimadazole carboxylase; role in adenine biosynthesis; required for normal growth and virulence in immunosuppressed mouse infection; not induced in GCN response, in contrast to S. cerevisiae ADE2; stationary phase-enriched	0	4	E
Plate 20	E05	1382	orf19.3852		CR_06030C_A	Has domain(s) with predicted catalytic activity	0	0	NE
Plate 20	E06	1377	orf19.6464		C7_02450W_A	Protein of unknown function; induced upon adherence to polystyrene; oxidative stress-induced via Cap1	0	0	NE
Plate 20	E07	1392	orf19.2882	XUT1	C4_06530C_A	Putative high-affinity, high-capacity xanthine-uric acid/H+ symporter; similar to A. nidulans UapA; member of the Nucleobase-Ascorbate Transporter/Nucleobase-Cation Symporter (NAT/NCS2) family; rat catheter biofilm induced	0	0	NE
Plate 20	E08	1357	orf19.1365		C2_09860C_A	Putative monooxygenase; mutation confers hypersensitivity to toxic ergosterol analog; constitutive expression independent of MTL or white-opaque status	1.5	0	NE
Plate 20	E09	1321	orf19.4229		C5_02220C_A	Putative polyphosphate phosphatase; role in hydrolysis of diphosphorylated inositol polyphosphates and diadenosine polyphosphates; Spider biofilm induced	0	0	NE
Plate 20	E10	1457	orf19.4823	LIP6	C1_09600C_A	Secreted lipase, member of family of lipase genes expressed differentially in response to carbon source and during infection; may have a role in nutrition and/or in creating an acidic microenvironment; induced on adherence to polystyrene	0	0	NE
Plate 20	E11	1395	orf19.1709		C3_01420C_A	Sterol carrier domain protein; alkaline downregulated; colony morphology-related gene regulation by Ssn6; Spider biofilm induced	0	0	NE
Plate 20	E12	2318	orf19.1954	PUS4	C5_01180W_A	Putative pseudouridine synthase; transcript regulated by Nrg1, Mig1, and Tup1	0	0	NE
Plate 20	F01	2767	orf19.1270	FRE3	C4_05840W_A	Protein with similarity to ferric reductase Fre10p; possibly an essential gene, disruptants not obtained by UAU1 method	0	0	NE
Plate 20	F02	2868	orf19.651	LYP1	CR_05020W_A	Putative permease; amphotericin B induced; flucytosine repressed; possibly an essential gene, disruptants not obtained by UAU1 method	0	0	NE
Plate 20	F03	2791	orf19.2158	NAG3	C6_04610C_A	Putative MFS transporter; similar to Nag4; required for wild-type mouse virulence and cycloheximide resistance; in gene cluster that includes genes encoding enzymes of GlcNAc catabolism; Spider biofilm repressed	0	0	NE
Plate 20	F04	2869	orf19.1504		C2_01920C_A	Putative patatin-like phospholipase; fungal-specific (no human or murine homolog)	0	0	NE
Plate 20	F05	3064	orf19.3422	FMP27	C6_01650C_A	Putative mitochondrial protein; mRNA binds She3	0	0	NE
Plate 20	F06	2913	orf19.1382	YEA4	C2_09700W_A	Putative uridine diphosphate-N-acetylglucosamine (UDP-GlcNAc) transporter; required for cell wall chitin synthesis; induced by alpha pheromone in SpiderM medium	0	0	NE
Plate 20	F07	2897	orf19.1509	ROD1	C2_01970C_A	Protein similar to S. cerevisiae Rod1;a membrane protein with a role in drug tolerance; repressed by Rgt1; mutant is viable	0	0	NE
Plate 20	F08	2497	orf19.6592		CR_09700W_A	Predicted membrane transporter, member of the aromatic acid:proton symporter (AAHS) family, major facilitator superfamily (MFS)	0	0	NE
Plate 20	F09	2803	orf19.2749		C4_02520C_A	BTB/POZ domain protein; induced by Mnl1 under weak acid stress; flow model biofilm induced; Spider biofilm induced	0	0	NE
Plate 20	F10	2742	orf19.1984		CR_07700W_A	Has aminoglycoside phosphotransferase and protein kinase domains; rat catheter and flow model biofilm induced	#N/A	#N/A	#N/A
Plate 20	F11	3744	orf19.4079	SLP2	C2_09170W_A	Protein similar to stomatin mechanoreception protein	0	0	NE
Plate 20	F12	3777	orf19.841		C2_03800C_A	Ortholog(s) have role in Golgi vesicle transport and Golgi membrane localization	0	0	NE
Plate 20	G01	5021	orf19.4288	CTA7	C5_02700W_A	Zn(II)2Cys6 transcription factor; activates transcription in 1-hybrid assay in S. cerevisiae; has similarity to S. cerevisiae Stb4	0	0	NE
Plate 20	G02	399	orf19.4236	RET2	C5_02300C_A	Delta subunit of the coatomer complex (COPI); coats Golgi-derived transport vesicles; involved in retrograde transport between Golgi and ER; interacts with Crk1 in the two-hybrid system; Spider biofilm repressed	0	4	E
Plate 20	G03	959	orf19.3586		C2_08830W_A	Ortholog(s) have role in fungal-type cell wall organization, vesicle-mediated transport and integral to endoplasmic reticulum membrane localization	0	0	NE
Plate 20	G04	962	orf19.5604	MDR1	C6_03170C_A	Plasma membrane MDR/MFS multidrug efflux pump; methotrexate is preferred substrate; overexpression in drug-resistant clinical isolates confers fluconazole resistance; repressed in young biofilms; rat catheter biofilm induced	0	0	NE
Plate 20	G05	964	orf19.1853	HHT2	CR_06810W_A	Putative histone H3; farnesol regulated; Hap43-induced; rat catheter and Spider biofilm repressed	0	0	NE
Plate 20	G06	972	orf19.754	YBN5	C1_04890W_A	P-loop ATPase with similarity to human OLA1 and bacterial YchF; Spider biofilm repressed	0.25	0.75	GD
Plate 20	G07	1977	orf19.2149		C6_04550C_A	Putative sulfate permease; S. cerevisiae ortholog YPR003C localizes to the endoplasmic reticulum; regulated by Sef1p-, Sfu1p-, and Hap43p	0	0	NE
Plate 20	G08	2975	orf19.4519	SUV3	C2_04350C_A	RNA helicase; mitochondrial RNA catabolism; required for chlamydospore formation, embedded hyphal growth, wild-type respiratory growth, alkaline-induced morphogenesis and SD or Spider biofilm formation; rat catheter biofilm induced	1	1	GD
Plate 20	G09	2022	orf19.6358		C1_12650C_A	Ortholog(s) have protein homodimerization activity, ubiquitin-protein ligase activity and role in cellular response to ionizing radiation, free ubiquitin chain polymerization, postreplication repair, protein K63-linked ubiquitination	0	0	NE
Plate 20	G10	3211	orf19.478		CR_03960C_A	Protein required for fusion of cvt-vesicles and autophagosomes with the vacuole; plays a role in autophagy, protein targeting to vacuole and vesicle docking; flow model biofilm induced	0	0	NE
Plate 20	G11	1105	orf19.4855	BUD31	C1_09880C_A	Bud31 ortholog; not subject to mating-type regulation, in contrast to S. cerevisiae Bud31 which has a role in specifying the bud site; Spider biofilm induced	0	0	NE
Plate 20	G12	1113	orf19.1394		C2_09600C_A	Putative protein of unknown function; mutant is viable; protein level decreases in stationary phase cultures; Spider biofilm induced	0	0	NE
Plate 20	H01	1948	orf19.3915		C5_04300C_A	Putative metallodipeptidase; protein present in exponential and stationary growth phase yeast; Hog1-induced; Hap43-repressed; sumoylation target; Spider biofilm repressed	0	0	NE
Plate 20	H02	1997	orf19.1940		C5_01290C_A	Ortholog(s) have role in ubiquinone biosynthetic process and mitochondrial inner membrane localization	0	0	NE
Plate 20	H03	2000	orf19.1849		CR_06840W_A	Ortholog(s) have U3 snoRNA binding, rRNA binding activity, role in maturation of SSU-rRNA from tricistronic rRNA transcript (SSU-rRNA, 5.8S rRNA, LSU-rRNA) and nucleolus, small-subunit processome localization	0	3.5	E
Plate 20	H04	2008	orf19.3980		C5_04920C_A	Ortholog(s) have role in cytoplasmic translation, regulation of translation and cytosol, polysomal ribosome localization	0	0	NE
Plate 20	H05	2015	orf19.2984	MST1	C1_02930C_A	Ortholog(s) have role in mitochondrial threonyl-tRNA aminoacylation and mitochondrion localization	0	0	NE
Plate 20	H06	2016	orf19.1659	ALG8	C3_01880W_A	Putative glucosyltransferase involved in cell wall mannan biosynthesis; transcription is elevated in nik1 and sln1 homozygous null mutants, but not in the chk1 null mutant; possibly an essential gene, disruptants not obtained by UAU1 method	0	0	NE
Plate 20	H07	2229	orf19.7324	THI13	CR_09290W_A	Thiamin pyrimidine synthase; synthesis of the thiamine precursor hydroxymethylpyrimidine phosphate; single-turnover enzyme that provides histidine for HMP-P formation; induced by nitric oxide independent of Yhb1; Spider biofilm induced	0	0	NE
Plate 20	H08	2246	orf19.7391	OCH1	C3_06090C_A	Alpha-1,6-mannosyltransferase; initiates N-glycan outer chain branch addition; similar to S. cerevisiae Och1p; required for wild-type virulence in mouse intravenous infection; fungal-specific (no human or murine homolog)	0	0	NE
Plate 20	H09	2347	orf19.1078	HBR2	C6_04220C_A	Putative alanine glyoxylate aminotransferase; regulated by Gcn4p and hemoglobin; stationary phase enriched protein	0	0	NE
Plate 20	H10	2350	orf19.656	DPP1	C1_11470C_A	Putative diacylglycerol pyrophosphate phosphatase of diacylglycerol production for phospholipid biosynthesis; downregulation correlates with clinical development of fluconazole resistance	0	0	NE
Plate 20	H11	3742	orf19.4339	VPS4	C5_03090W_A	AAA-ATPase involved in transport from MVB to the vacuole and ESCRT-III complex disassembly; mutation decreases SAP secretion and virulence in murine intravenous infection; regulated by Gcn2p, Gcn4p; required for normal Rim8p processing	0	0	NE
Plate 20	H12	1970	orf19.1575	PRS1	C2_02510W_A	Phosphoribosylpyrophosphate synthetase; enzyme of purine, pyrimidine, histidine, and tryptophan biosynthesis; essential; flucytosine induced; macrophage/pseudohyphal-induced	0	3.5	E
Plate 21	A01	2730	orf19.4334	PGA58	C5_03050C_A	Putative GPI-anchored protein; transcription is positively regulated by Tbf1p	0	0	NE
Plate 21	A02	2789	orf19.4365		CR_03660C_A	Has domain(s) with predicted RNA methyltransferase activity and role in RNA processing, tRNA processing	0	0	NE
Plate 21	A03	2792	orf19.2160	NAG4	C6_04620C_A	Putative transporter; fungal-specific; similar to Nag3p and to S. cerevisiae Ypr156Cp and Ygr138Cp; required for wild-type mouse virulence and wild-type cycloheximide resistance; gene cluster encodes enzymes of GlcNAc catabolism	0	1	GD
Plate 21	A04	2811	orf19.4131		C5_01410C_A	Ortholog(s) have role in protein folding in endoplasmic reticulum and ER membrane protein complex localization	0	0	NE
Plate 21	A05	3088	orf19.6595	RTA4	CR_09680C_A	Protein similar to S. cerevisiae Rsb1p, involved in fatty acid transport; transposon mutation affects filamentous growth; alkaline downregulated; caspofungin induced; possibly an essential gene; Hap43p-repressed	1.25	1.5	GD
Plate 21	A06	3124	orf19.1559	HOM2	C2_02370C_A	Aspartate-semialdehyde dehydrogenase; forms a homodimer; conserved in bacteria, archaea, and fungi but not in mammals; ketoconazole-repressed; protein present in exponential and stationary growth phase yeast cultures; GlcNAc-induced protein	0	4	E
Plate 21	A07	3189	orf19.5667	MNR2	C4_00400W_A	Putative ion transporter; fungal-specific (no human or murine homolog)	0	0	NE
Plate 21	A08	905	orf19.769	IFE1	C1_04750W_A	Putative medium-chain alcohol dehydrogenase; rat catheter and Spider biofilm repressed	0	0	NE
Plate 21	A09	909	orf19.3555	BUD14	C2_05260W_A	Putative SH3-domain-containing protein; predicted role in bud-site selection; Spider biofilm induced	0	0	NE
Plate 21	A10	919	orf19.2886	CEK1	C4_06480C_A	ERK-family protein kinase; required for wild-type yeast-hypha switch, mating efficiency, virulence in mice; Cst20-Hst7-Cek1-Cph1 MAPK pathway regulates mating, and invasive hyphal growth under some conditions; Spider biofilm induced	0	0	NE
Plate 21	A11	920	orf19.1836	APN2	C1_10650W_A	Putative class II abasic (AP) endonuclease; flucytosine induced	0	0	NE
Plate 21	A12	921	orf19.517	HAP31	CR_04290W_A	CCAAT-binding transcription factor; regulates CYC1; required for resistance to rapamycin, copper; induced in high iron; repressed in low iron; Sef1, Sfu1, and Hap43 regulated; rat catheter and Spider biofilm induced	0	0	NE
Plate 21	B01	2002	orf19.331		C3_03310C_A	Ortholog(s) have S-adenosylmethionine-dependent methyltransferase activity, protein methyltransferase activity and role in peptidyl-glutamine methylation, regulation of translation	0	1	GD
Plate 21	B02	210	orf19.2600	SPC98	CR_01990C_A	Putative component of the microtubule-nucleating Tub4p (gamma-tubulin) complex; periodic mRNA expression, peak at cell-cycle S/G2 phase	0	3.75	E
Plate 21	B03	912	orf19.4551	CTN1	C1_01740W_A	Carnitine acetyl transferase; required for growth on nonfermentable carbon sources, not for hyphal growth or virulence in mice; induced in macrophage; macrophage/pseudohyphal-repressed after 16 hr; rat catheter, Spider biofilm induced	0	0	NE
Plate 21	B04	929	orf19.3941	URA7	C5_04570C_A	CTP synthase 1; flucytosine induced; protein present in exponential and stationary growth phase yeast cultures	0	4	E
Plate 21	B05	930	orf19.4016		C5_05230C_A	Putative ubiquinol-cytochrome-c reductase; amphotericin B induced; repressed by nitric oxide; protein level decreases in stationary phase cultures; Hap43-repressed; Spider biofilm repressed	0	0	NE
Plate 21	B06	931	orf19.3369	MOH1	C4_03430W_A	Ortholog of S. cerevisiae Moh1, essential for staionary phase growth; induced by alpha pheromone in SpiderM medium and by Mnl1 under weak acid stress; possibly essential (UAU1 method); flow model biofilm induced; Spider biofilm induced	0	0	NE
Plate 21	B07	49	orf19.4410	ALG1	C4_06000W_A	Protein similar to S. cerevisiae Alg1p, a mannosyltransferase involved in N-linked protein glycosylation; likely to be essential for growth, based on an insertional mutagenesis strategy	0	0	NE
Plate 21	B08	61	orf19.4473	SPC19	C1_03980W_A	Essential subunit of the Dam1 (DASH) complex, which acts in chromosome segregation by coupling kinetochores to spindle microtubules	0	4	E
Plate 21	B09	376	orf19.2298	WBP1	C1_11170W_A	Putative oligosaccharyltransferase subunit; Spider biofilm repressed	0	4	E
Plate 21	B10	388	orf19.3037		C1_03370W_A	Putative poly(A)-binding protein; regulated by Gcn4p; induced in response to amino acid starvation (3-AT treatment); protein present in exponential and stationary growth phase yeast cultures	0	4	E
Plate 21	B11	459	orf19.2857		CR_02970C_A	Ortholog(s) have ATP-dependent DNA helicase activity	0	4	E
Plate 21	B12	535	orf19.2090		C2_00410C_A	Ortholog of S. cerevisiae Ecm16, an essential DEAH-box ATP-dependent RNA helicase specific to the U3 snoRNP required for 18S rRNA synthesis; Hap43-induced; Spider biofilm induced	0	4	E
Plate 21	C01	684	orf19.3086		C4_07190W_A	Ortholog(s) have role in Golgi to plasma membrane transport, cytokinetic cell separation, exocytosis and cell cortex of cell tip, cell division site, cytosol, exocyst, mating projection tip, nucleus, spindle pole body localization	0	4	E
Plate 21	C02	693	orf19.1531		C2_02150C_A	Ortholog(s) have RNA binding, protein heterodimerization activity, role in mRNA cleavage, mRNA polyadenylation and mRNA cleavage factor complex, mitochondrion localization	1	4	E
Plate 21	C03	2057	orf19.6863	VPH1	C4_05240C_A	Vacuolar H(+)-ATPase; transcription regulated by Nrg1, Mig1, and Tup1	0	0	NE
Plate 21	C04	2074	orf19.6889	MKK2	C2_05780C_A	Ortholog of S. cerevisiae Mkk2; MAP kinase kinase involved in signal transduction; macrophage-downregulated; mutants are viable and hypersensitive to caspofungin	0	0	NE
Plate 21	C05	2757	orf19.3641	CAN3	C6_00830C_A	Predicted amino acid transmembrane transporter; transcript regulated by white-opaque switch; Hap43-repressed gene	0	0	NE
Plate 21	C06	1585	orf19.1033	STR2	C1_03760C_A	Ortholog(s) have cystathionine gamma-synthase activity, role in transsulfuration and cytosol, nucleus localization	0	0	NE
Plate 21	C07	1552	orf19.5530	NAB3	C6_02600W_A	Putative nuclear polyadenylated RNA-binding protein; flucytosine repressed	0	0	NE
Plate 21	C08	1580	orf19.7611	TRX1	CR_10350C_A	Thioredoxin; involved in response to reactive oxygen species; biofilm, benomyl, flucytosine, peroxide, Hap43 induced; amphotericin B, caspofungin repressed; induced by human neutrophils; macrophage-repressed gene	0	0	NE
Plate 21	C09	1419	orf19.2114		C2_00180C_A	Predicted uricase; ortholog of S. pombe SPCC1223.09; Spider biofilm induced	0	0	NE
Plate 21	C10	1563	orf19.5006.1		C1_13690C_A	Ortholog(s) have SNAP receptor activity and role in Golgi to plasma membrane transport, cell cycle cytokinesis, endocytosis, exocytosis, vesicle fusion	0	0	NE
Plate 21	C11	1582	orf19.3700	TOM70	C7_02640W_A	Ortholog(s) have mitochondrion targeting sequence binding, protein channel activity and role in protein import into mitochondrial inner membrane, protein import into mitochondrial matrix	0	0	NE
Plate 21	C12	1371	orf19.3290		C1_01010W_A	Plasma membrane-localized protein; repressed by nitric oxide; Hap43p-repressed gene	0	0	NE
Plate 21	D01	1543	orf19.6988	OST1	C3_05530W_A	Alpha subunit of the oligosaccharyltransferase complex of the ER lumen; catalyzes asparagine-linked glycosylation of newly synthesized proteins; Spider biofilm repressed	0	4	E
Plate 21	D02	1437	orf19.1586	FGR22	C2_02600C_A	Putative phosphatidylinositol-specific phospholipase C (PI-PLC); predicted type 2 membrane protein; no S. cerevisiae ortholog; role in, and regulated by, filamentation, Hap43p; almost identical to orf19.5797	0	0	NE
Plate 21	D03	1530	orf19.2755		C4_02470C_A	Ortholog(s) have role in proteasomal ubiquitin-dependent protein catabolic process, proteasomal ubiquitin-independent protein catabolic process and cytosol, nucleus, proteasome core complex, beta-subunit complex localization	0	4	E
Plate 21	D04	1446	orf19.1664		C3_01820W_A	Protein of unknown function; expression downregulated in an ssr1 null mutant	0	0	NE
Plate 21	D05	1289	orf19.7594		CR_10180W_A	Protein of unknown function; Spider biofilm induced	0	0	NE
Plate 21	D06	1423	orf19.5784	AMO1	C2_03120W_A	Putative peroxisomal copper amine oxidase	0	0	NE
Plate 21	D07	1430	orf19.2461	PRN4	C1_05880W_A	Protein with similarity to pirins; increased transcription is observed upon benomyl treatment	0	0	NE
Plate 21	D08	1217	orf19.3765	RAX2	C1_12510W_A	Plasma membrane protein; detected at yeast-form cell plasma membrane by mass spec; filament induced, repressed by Rim101, Tup1; Hap43-induced; Spider biofilm induced	0	0	NE
Plate 21	D09	1555	orf19.1480		C2_01690W_A	Putative succinate dehydrogenase; enzyme of citric acid cycle; repressed by nitric oxide; Efg1, Hap43 repressed	0	0	NE
Plate 21	D10	1551	orf19.5657	SWI1	C4_00300C_A	Protein involved in transcription regulation; ortholog of S. cerevisiae Swi1p, which is a subunit of the SWI/SNF chromatin remodeling complex; interacts with Snf2p; SWI/SNF complex is essential for hyphal growth and virulence	0	0.5	GD
Plate 21	D11	1558	orf19.395	ENO1	C1_08500C_A	Enolase; glycolysis and gluconeogenesis; major cell-surface antigen; binds host plasmin/plasminogen; immunoprotective; Hap43, phagocytosis induced; farnesol-repressed; flow model biofilm induced; Spider biofilm repressed; may be essential	0	4	E
Plate 21	D12	1560	orf19.494		CR_04110W_A	Putative RNA-binding protein; role in assembly of box H/ACA snoRNPs and thus pre-rRNA processing; Spider biofilm induced	0	3	E
Plate 21	E01	1458	orf19.4822	LIP10	C1_09590C_A	Secreted lipase, member of a lipase gene family whose members are expressed differentially in response to carbon source and during infection; may have a role in nutrition and/or in creating an acidic microenvironment	0	0	NE
Plate 21	E02	1172	orf19.6977	GPI1	C3_05390C_A	Putative protein of GPI synthesis; expression is reduced in a fluconazole-resistant isolate	0	0	NE
Plate 21	E03	1365	orf19.10	ALK8	CR_07130C_A	Alkane-inducible cytochrome P450; catalyzes hydroxylation of lauric acid to hydroxylauric acid; overproduction causes fluconazole resistance in WT and causes multidrug resistance in a cdr1 cdr2 double mutant; rat catheter biofilm repressed	0	0	NE
Plate 21	E04	1432	orf19.211		C2_08950W_A	Predicted homeodomain-like transcription factor; also has a metal-binding Ada DNA repair protein domain; Spider biofilm induced	0	0	NE
Plate 21	E05	1497	orf19.5921		C3_04630W_A	Ortholog of C. parapsilosis CDC317 : CPAR2_404290, Candida tenuis NRRL Y-1498 : CANTEDRAFT_115338, Debaryomyces hansenii CBS767 : DEHA2G13596g and Candida dubliniensis CD36 : CD36_84580	0	0	NE
Plate 21	E06	2402	orf19.781	DUR31	C1_04650W_A	High affinity spermidine transporter; expression is induced by urea; fungal-specific (no human or murine homolog); not required for virulence in a mouse intravenous model	0	0	NE
Plate 21	E07	2595	orf19.7002		C3_05660C_A	Ortholog of C. parapsilosis CDC317 : CPAR2_806990, Candida tenuis NRRL Y-1498 : CANTEDRAFT_122709, Debaryomyces hansenii CBS767 : DEHA2E00110g and Candida dubliniensis CD36 : CD36_85625	0	0	NE
Plate 21	E08	2389	orf19.2644	QCR2	C5_03350W_A	Ubiquinol-cytochrome-c reductase; antigenic; induced by interaction with macrophage; repressed by nitric oxide; in detergent-resistant membrane fraction (possible lipid raft component); levels decrease in stationary phase; Hap43p-repressed	0	0	NE
Plate 21	E09	2372	orf19.4325		C5_03000C_A	Ortholog of C. parapsilosis CDC317 : CPAR2_303150, Candida tenuis NRRL Y-1498 : CANTEDRAFT_133407, Debaryomyces hansenii CBS767 : DEHA2G08030g and Candida dubliniensis CD36 : CD36_52760	0	0	NE
Plate 21	E10	2340	orf19.4905		C1_10340W_A	Putative MFS transporter; Hap43p-induced gene; also regulated by regulated by Sef1p and Sfu1p; repressed in a ssr1 null mutant	0	0	NE
Plate 21	E11	2520	orf19.428		C1_05370C_A	Putative serine/threonine kinase; induced during planktonic growth; rat catheter biofilm repressed	0	0	NE
Plate 21	E12	2411	orf19.3544		C2_05130W_A	Putative protein of unknown function; Hap43p-repressed gene	0	0	NE
Plate 21	F01	2526	orf19.2772	HOS3	C4_02300W_A	Histone deacetylase; similar to S. cerevisiae Hos3p; greater expression and longer mRNA in white cells, compared to opaque cells; has conserved deacetylation motif	0	0	NE
Plate 21	F02	2521	orf19.444		C1_05220C_A	Has domain(s) with predicted nucleic acid binding, nucleotide binding activity	0	0	NE
Plate 21	F03	2588	orf19.4006		C5_05140W_A	Ortholog(s) have cytosol, nucleus localization	0	0	NE
Plate 21	F04	2403	orf19.5553		C6_02800W_A	Ortholog(s) have methionine-R-sulfoxide reductase activity, role in cellular response to oxidative stress and cytoplasm, nucleus localization	0	0	NE
Plate 21	F05	2528	orf19.2762	AHP1	C4_02410C_A	Alkyl hydroperoxide reductase; immunogenic; fluconazole-induced; amphotericin B, caspofungin, alkaline repressed; core stress response induced; Ssk1/Nrg1/Tup1/Ssn6/Hog1 regulated; flow model biofilm induced; rat catheter biofilm repressed	0	0	NE
Plate 21	F06	2418	orf19.1797		C4_05400C_A	D-arabinose 5-phosphate isomerase; has GutQ domain which is associated with phosphosugar binding; other biofilm induced; rat catheter and Spider biofilm induced; F-12/CO2 early biofilm induced	0	0	NE
Plate 21	F07	1190	orf19.866	RAD32	C2_03540W_A	Protein similar to S. cerevisiae protein with role in nucleotide excision repair; down-regulation associated with azole resistance; Hap43p-repressed gene	0	0	NE
Plate 21	F08	1499	orf19.4718	TRP5	C4_06110C_A	Predicted tryptophan synthase; identified in detergent-resistant membrane fraction (possible lipid raft component); predicted N-terminal acetylation; Gcn4p-regulated; S. cerevisiae ortholog is Gcn4p regulated; upregulated in biofilm;	0	3	E
Plate 21	F09	1496	orf19.5924	ZCF31	C3_04640W_A	Zn(II)2Cys6 transcription factor of unknown function; mutant is sensitive to copper and SDS, and resistant to Calcofluor White; required for yeast cell adherence to silicone substrate	0	0	NE
[truncated: 411 more rows]

## Sheet: GRACEv2_Verdict
Supplementary Dataset 2
[truncated: 931 more rows]
