# Supplementary material for: Leveraging machine learning essentiality predictions and chemogenomic interactions to identify antifungal targets
Source: Nat Commun. 2021 Nov 11;12:6497. doi: 10.1038/s41467-021-26850-3 (PMC8586148; doi:10.1038/s41467-021-26850-3)
Supplement: Supplementary file 6 — Supplementary Data 4 [file 41467_2021_26850_MOESM6_ESM.xlsx]

## Sheet: sup4_Sac
Supplementary Dataset 4: Fungal-Specific Essential Genes
Feature Name	C.albicans Standard Name	Human_orthologs_MetaPhOrs	Human_orthologs_InParanoid	S.cerevisiae_ortholog_name	S.cerevisiae_ortholog_common	Fungal specific	S.cerevisiae ortholog
C1_00070W_A	MVD	P53602	P53602	YNR043W	MVD1	No	Yes
C1_00110W_A	CCT8	P50990	P50990	YJL008C	CCT8	No	Yes
C1_00180W_A	RPL16A		P40429	YIL133C	RPL16A	No	Yes
C1_00510W_A				YBR176W	ECM31	Yes	Yes
C1_00640C_A	RPO41	O00411		YFL036W	RPO41	No	Yes
C1_00660C_A		Q13190	Q13190	YLR026C	SED5	No	Yes
C1_00710C_A	TUB2	P07437	P04350	YFL037W	TUB2	No	Yes
C1_00770C_A	ROT1			YMR200W	ROT1	Yes	Yes
C1_00900W_A	RRS1	Q15050		YOR294W	RRS1	No	Yes
C1_00940W_A	RPB11			YOL005C	RPB11	Yes	Yes
C1_00950C_A	CDC5	A0A024QZV1	P53350	YMR001C	CDC5	No	Yes
C1_01070C_A				NA	NA	Yes	No
C1_01160C_A		Q9NQT5	Q9NQT5	YOL142W	RRP40	No	Yes
C1_01350C_A	TIF	P60842		YJL138C	TIF2	No	Yes
C1_01480C_A	RPS21	P15880	P15880	YGL123W	RPS2	No	Yes
C1_01530C_A		Q5T160	Q5T160	YDR341C	YDR341C	No	Yes
C1_01570C_A	RPB7	P62487	P62487	YDR404C	RPB7	No	Yes
C1_01580W_A		Q9BYD1	Q9BYD1	YOR150W	MRPL23	No	Yes
C1_01590C_A		P30876	P30876	YOR151C	RPB2	No	Yes
C1_01600W_A	MRP20	M!06692507		YDR405W	MRP20	No	Yes
C1_01670C_A	ESP1			YGR098C	ESP1	Yes	Yes
C1_01850C_A		E7EWR4		YGL044C	RNA15	No	Yes
C1_02160W_A			Q9Y296	YDR246W	TRS23	No	Yes
C1_02420C_A	GSC1			YGR032W	GSC2	Yes	Yes
C1_02460W_A	RPL10	X5D2T3	P27635	YLR075W	RPL10	No	Yes
C1_02710W_A	FRS2		Q9Y285	YFL022C	FRS2	No	Yes
C1_02750C_A		Q86U86		YLR357W	RSC2	No	Yes
C1_02790W_A	TIF34		Q13347	YMR146C	TIF34	No	Yes
C1_02820W_A	LYS2	Q8WVX9		YBR115C	LYS2	No	Yes
C1_02880C_A	MIA40			YKL195W	MIA40	Yes	Yes
C1_03020C_A	RPL13		P26373	YDL082W	RPL13A	No	Yes
C1_03030W_A	RPS16A			YMR143W	RPS16A	Yes	Yes
C1_03060C_A	TSR2	A0A024R9U9	Q969E8	YLR435W	TSR2	No	Yes
C1_03070C_A	ORC1	Q13415	Q13415	YML065W	ORC1	No	Yes
C1_03090W_A	RPS1		P61247	YML063W	RPS1B	No	Yes
C1_03110W_A	RPL6	A0A024RBK3		YLR448W	RPL6B	No	Yes
C1_03210C_A	CDC12			YHR107C	CDC12	Yes	Yes
C1_03300C_A	MAS1	G3V0E4	O75439	YLR163C	MAS1	No	Yes
C1_03310W_A		O96019		YPR034W	ARP7	No	Yes
C1_03350C_A	RLI1	P61221	P61221	YDR091C	RLI1	No	Yes
C1_03370W_A			P11940	YER165W	PAB1	No	Yes
C1_03500W_A	YPT1	Q9H0U4	P62820	YFL038C	YPT1	No	Yes
C1_03520W_A	RPN3	Q9UNS2	O43242	YER021W	RPN3	No	Yes
C1_03530W_A	MED17			YER022W	SRB4	Yes	Yes
C1_03560C_A	SUA71	Q00403	Q00403	YPR086W	SUA7	No	Yes
C1_03650C_A	MRPL27			YBR282W	MRPL27	Yes	Yes
C1_03780C_A	HMG1	A0A024RAP2	P04035	YML075C	HMG1	No	Yes
C1_03830C_A		Q9Y3B2		YNL232W	CSL4	No	Yes
C1_03980W_A	SPC19			YDR201W	SPC19	Yes	Yes
C1_04040C_A		Q86U38	Q86U38	YJL010C	NOP9	No	Yes
C1_04130W_A	ERB1	Q14137	Q14137	YMR049C	ERB1	No	Yes
C1_04210C_A	CDC3		Q16181	YLR314C	CDC3	No	Yes
C1_04390C_A	NOP4	A0A024R753	Q9NW13	YPL043W	NOP4	No	Yes
C1_04830W_A	SEC21	Q9Y678	Q9UBF2;Q9Y678	YNL287W	SEC21	No	Yes
C1_05240C_A	RPT1	P35998	P35998	YKL145W	RPT1	No	Yes
C1_05460W_A	KOG1	Q8N122	Q8N122	YHR186C	KOG1	No	Yes
C1_05660C_A		A0A024R071	O75694	YBL079W	NUP170	No	Yes
C1_05720W_A				YGL076C	RPL7A	Yes	Yes
C1_06070W_A			O15235	YNR036C	MRPS12	No	Yes
C1_06100C_A	MSI3	A0A024RDS1;P34932;O95757	P34932	YPL106C	SSE1	No	Yes
C1_06230C_A	MDM34			YGL219C	MDM34	Yes	Yes
C1_06540C_A				YCR035C	RRP43	Yes	Yes
C1_06930W_A	PGA63	Q9NQW1	Q9NQW1	YDL195W	SEC31	No	Yes
C1_06960W_A	SUI2	P05198	P05198	YJR007W	SUI2	No	Yes
C1_07110W_A	TAF145			YGR274C	TAF1	Yes	Yes
C1_07690C_A		P55060		YGL238W	CSE1	No	Yes
C1_07890C_A	ADE5,7			YGL234W	ADE5,7	Yes	Yes
C1_07910C_A	MRPL3	A0A024R473		YMR024W	MRPL3	No	Yes
C1_08090C_A	FUN12	O60841	O60841	YAL035W	FUN12	No	Yes
C1_08290C_A	DIP2	Q5TDG3	Q9UNX4	YLR129W	DIP2	No	Yes
C1_08360C_A	OLE1	O00767	O00767	YGL055W	OLE1	No	Yes
C1_08450C_A	CDC42		P60953	YLR229C	CDC42	No	Yes
C1_08500C_A	ENO1		P06733	YGR254W	ENO1	No	Yes
C1_08520C_A				YDR462W	MRPL28	Yes	Yes
C1_08560W_A	TCP1	P17987	P17987	YDR212W	TCP1	No	Yes
C1_08590C_A	ERG1		Q14534	YGR175C	ERG1	No	Yes
C1_08660C_A		Q15428		YDL043C	PRP11	No	Yes
C1_08740C_A	SEC24		O95486	YIL109C	SEC24	No	Yes
C1_08980C_A	ZWF1	M!06694297		YNL241C	ZWF1	No	Yes
C1_09170W_A	CTA8	A0A024R6X7	Q00613	YGL073W	HSF1	No	Yes
C1_09370W_A	CEF1	Q99459	Q99459	YMR213W	CEF1	No	Yes
C1_09460W_A	ERG12	B2RDU6	Q03426	YMR208W	ERG12	No	Yes
C1_09490C_A	GUA1		P49915	YMR217W	GUA1	No	Yes
C1_09510W_A	YTM1		Q9GZL7	YOR272W	YTM1	No	Yes
C1_09640W_A	ADE12		Q8N142	YNL220W	ADE12	No	Yes
C1_09670C_A				NA	NA	Yes	No
C1_09710C_A		M!06699623	O15213	YER082C	UTP7	No	Yes
C1_09730W_A	DAM1			YGR113W	DAM1	Yes	Yes
C1_09860C_A	TFA1	P29083	P29083	YKL028W	TFA1	No	Yes
C1_10120C_A		P29084		YKR062W	TFA2	No	Yes
C1_10390C_A	RPL42			YNL162W	RPL42A	Yes	Yes
C1_10620W_A			O60832	YLR175W	CBF5	No	Yes
C1_10660W_A	TBP1		P20226	YER148W	SPT15	No	Yes
C1_10670C_A	RPA190	O95602	O95602	YOR341W	RPA190	No	Yes
C1_10790W_A	CDC48	Q9NVI7	P55072	YDL126C	CDC48	No	Yes
C1_10870W_A	RPS17B			YDR447C	RPS17B	Yes	Yes
C1_10880W_A		Q9NYH9		YDR449C	UTP6	No	Yes
C1_10970W_A		Q9H501	Q9H501	YDR365C	ESF1	No	Yes
C1_11060C_A	RPL2			YFR031C-A	RPL2A	Yes	Yes
C1_11090C_A				YNL317W	PFS2	Yes	Yes
C1_11170W_A	WBP1	P39656	P39656	YEL002C	WBP1	No	Yes
C1_11220C_A	TIM50			YPL063W	TIM50	Yes	Yes
C1_11360W_A	RPL37B			YDR500C	RPL37B	Yes	Yes
C1_11420W_A	KRR1	Q13601	Q13601	YCL059C	KRR1	No	Yes
C1_11450C_A	SAM2	P31153	P31153	YDR502C	SAM2	No	Yes
C1_11500C_A	ARO7			YPR060C	ARO7	Yes	Yes
C1_12050W_A	RPN2	Q99460	Q99460	YIL075C	RPN2	No	Yes
C1_12210W_A	TRP3	P27708		YKL211C	TRP3	No	Yes
C1_12220W_A	CDC6	A0A024R1S2		YJL194W	CDC6	No	Yes
C1_12310C_A	CSI2	Q8TDN6	Q8TDN6	YOL077C	BRX1	No	Yes
C1_12350W_A		Q9Y2L1	Q9Y2L1	YOL021C	DIS3	No	Yes
C1_12380C_A	WRS1	A0A024R6K8	P23381	YOL097C	WRS1	No	Yes
C1_12390C_A	RPL27A			YHR010W	RPL27A	Yes	Yes
C1_12550C_A	CDC54	P33991	P33991	YPR019W	MCM4	No	Yes
C1_12770W_A	RPG1A	Q92614	Q14152	YBR079C	RPG1	No	Yes
C1_12820C_A		E5KT65	P19388	YBR154C	RPB5	No	Yes
C1_13020C_A	SPC3	P61009	P61009	YLR066W	SPC3	No	Yes
C1_13030C_A		M!06696173	P49589	YNL247W	YNL247W	No	Yes
C1_13050W_A	RPL14			YHL001W	RPL14B	Yes	Yes
C1_13300C_A	RPN1	Q13200		YHR027C	RPN1	No	Yes
C1_13580W_A	SEC18	P46459		YBR080C	SEC18	No	Yes
C1_13700W_A	ACT1			YFL039C	ACT1	Yes	Yes
C1_13710C_A	DAD1			YDR016C	DAD1	Yes	Yes
C1_13730C_A	DIM1	Q9UNQ2	Q9UNQ2	YPL266W	DIM1	No	Yes
C1_13860C_A	GND1	P52209	O15270	YHR183W	GND1	No	Yes
C1_13900C_A	LCB2	A0A024R6H1		YDR062W	LCB2	No	Yes
C1_14080W_A		Q9H583	Q9H583	YJL109C	UTP10	No	Yes
C1_14090W_A				YOR020C	HSP10	Yes	Yes
C1_14110C_A	RPL4B	P36578	P36578	YDR012W	RPL4B	No	Yes
C1_14150C_A	PAM16		Q9Y3D7	YJL104W	PAM16	No	Yes
C1_14230C_A	IRR1	D6W5U7		YIL026C	IRR1	No	Yes
C1_14240W_A		Q92922		YFR037C	RSC8	No	Yes
C1_14260C_A	TIF35		O75821	YDR429C	TIF35	No	Yes
C1_14390W_A	RPC10			YHR143W-A	RPC10	Yes	Yes
C1_14440C_A	GDI1	P31150	P31150	YER136W	GDI1	No	Yes
C1_14460W_A	RPN11	O00487	O00487	YFR004W	RPN11	No	Yes
C2_00030W_A	RRN3	Q9NYV6	Q9NYV6	YKL125W	RRN3	No	Yes
C2_00070C_A	MPP10	O00566	O00566	YJR002W	MPP10	No	Yes
C2_00200W_A		Q99633		YGR006W	PRP18	No	Yes
C2_00280C_A				YLR323C	CWC24	Yes	Yes
C2_00380C_A	RFA1	P27694	P27694	YAR007C	RFA1	No	Yes
C2_00410C_A		Q8IY37	Q8IY37	YMR128W	ECM16	No	Yes
C2_00710W_A	NPL6			YMR091C	NPL6	Yes	Yes
C2_01030W_A		Q9NX20		YBL038W	MRPL16	No	Yes
C2_01120W_A	KAR2	P11021	P11021	YJL034W	KAR2	No	Yes
C2_01200C_A	REG1			YDR028C	REG1	Yes	Yes
C2_01220W_A				YFR002W	NIC96	Yes	Yes
C2_01410C_A	CLB2		O95067	YPR119W	CLB2	No	Yes
C2_01490C_A		Q6P1K8	Q6P1K8	YLR005W	SSL1	No	Yes
C2_01530C_A		Q6IA69	Q6IA69	YHR074W	QNS1	No	Yes
C2_01610C_A	RPS26A	A0A024RB14	P62854	YGL189C	RPS26A	No	Yes
C2_01670C_A	STT3	Q8TCJ2	Q8TCJ2	YGL022W	STT3	No	Yes
C2_01820C_A				YGR013W	SNU71	Yes	Yes
C2_01830W_A	PRP39	Q9BZJ0		YML046W	PRP39	No	Yes
C2_02120W_A		E5KTM5		YMR228W	MTF1	No	Yes
C2_02150C_A		Q12996	Q12996	YMR061W	RNA14	No	Yes
C2_02270C_A				YMR158W	MRPS8	Yes	Yes
C2_02300W_A		Q96NC0	Q96NC0	YDL098C	SNU23	No	Yes
C2_02370C_A	HOM2			YDR158W	HOM2	Yes	Yes
C2_02460W_A	ERG7		P48449	YHR072W	ERG7	No	Yes
C2_02500W_A		Q15545		YMR227C	TAF7	No	Yes
C2_02510W_A	PRS1	A0A0B4J207		YHL011C	PRS3	No	Yes
C2_02710C_A		Q9Y3A4	Q9Y3A4	YCL031C	RRP7	No	Yes
C2_03010C_A	RNR21	M!06692467	P31350	YJL026W	RNR2	No	Yes
C2_03060W_A	PR26	A8K2M0	P43686	YDR394W	RPT3	No	Yes
C2_03100W_A	EFT2		P13639	YOR133W	EFT1	No	Yes
C2_03160C_A	RNR1	P23921	P23921	YER070W	RNR1	No	Yes
C2_03200W_A	PRP3	O43395	O43395	YDR473C	PRP3	No	Yes
C2_03270W_A	GPM1		P15259	YKL152C	GPM1	No	Yes
C2_03280W_A	NSP1	A0A024QZF1	P37198	YJL041W	NSP1	No	Yes
C2_03300W_A	HEM2	P13716	P13716	YGL040C	HEM2	No	Yes
C2_03560C_A		Q96DV4		YDR322W	MRPL35	No	Yes
C2_03810C_A	RPL21A	P46778		YBR191W	RPL21A	No	Yes
C2_03870W_A	GNA1	A0A024R649	Q96EK6	YFL017C	GNA1	No	Yes
C2_03960W_A	RPL39	Q9Y3U8		YMR194W	RPL36A	No	Yes
C2_03990W_A	GCD7	P49770	P49770	YLR291C	GCD7	No	Yes
C2_04200W_A	TBF1			YPL128C	TBF1	Yes	Yes
C2_04370W_A		Q7L2H7		NA	NA	No	No
C2_04570W_A			Q99848	YKL172W	EBP2	No	Yes
C2_04580W_A	ERG20	P14324	P14324	YJL167W	ERG20	No	Yes
C2_04600C_A	RPL17B	A0A024R261	P18621	YJL177W	RPL17B	No	Yes
C2_04640C_A	SNU114	Q15029		YKL173W	SNU114	No	Yes
C2_04680W_A	TIM17	Q99595	O60830	YJL143W	TIM17	No	Yes
C2_05000C_A	MRPL10	Q9P015	Q9P015	YNL284C	MRPL10	No	Yes
C2_05090W_A	MAK5	Q9GZR7	Q9GZR7	YBR142W	MAK5	No	Yes
C2_05100C_A	ERF1	P62495	P62495	YBR143C	SUP45	No	Yes
C2_05210W_A	DAD2			YKR083C	DAD2	Yes	Yes
C2_05230C_A	RPF2	Q9H7B2	Q9H7B2	YKR081C	RPF2	No	Yes
C2_05340C_A	RPC40	O15160	O15160	YPR110C	RPC40	No	Yes
C2_05460W_A	CDC19		P14618	YAL038W	CDC19	No	Yes
C2_05610C_A	RPS8A	P62241	P62241	YER102W	RPS8B	No	Yes
C2_05690C_A	YTH1		O95639	YPR107C	YTH1	No	Yes
C2_05710C_A				YPL143W	RPL33A	Yes	Yes
C2_05750W_A		Q9NZM5	Q9NZM5	YPL146C	NOP53	No	Yes
C2_06000W_A	LAS1	Q9Y4W2		YKR063C	LAS1	No	Yes
C2_06120C_A		Q7Z6J8		YJR141W	YJR141W	No	Yes
C2_06190W_A	ILV1		Q9GZT4	YER086W	ILV1	No	Yes
C2_06230W_A			Q9UKF6	YLR277C	YSH1	No	Yes
C2_06240W_A	SMD2			YLR275W	SMD2	Yes	Yes
C2_06250C_A	CDC46	B1AHB0	P33992	YLR274W	MCM5	No	Yes
C2_06310C_A	GSP1		P62826	YLR293C	GSP1	No	Yes
C2_06810C_A	RPL11	P62913		YGR085C	RPL11B	No	Yes
C2_06820C_A	PRE2	P28074	P28074	YPR103W	PRE2	No	Yes
C2_06830C_A	FHL1			YPR104C	FHL1	Yes	Yes
C2_07120W_A	RFA2	Q13156	P15927	YNL312W	RFA2	No	Yes
C2_07260C_A	DQD1			NA	NA	Yes	No
C2_07300C_A	RPA12	Q2L6J2	Q9P1U0	YJR063W	RPA12	No	Yes
C2_07340W_A	NOC4	Q9BVI4	Q9BVI4	YPR144C	NOC4	No	Yes
C2_07350W_A	MCM3		P25205	YEL032W	MCM3	No	Yes
C2_07380W_A	SSC1		P38646	YJR045C	SSC1	No	Yes
C2_07460W_A	TAF4	J3KTH2		YMR005W	TAF4	No	Yes
C2_07470W_A	YCS4	Q15021	Q15021	YLR272C	YCS4	No	Yes
C2_07670C_A	GLE1	Q53GS7	Q53GS7	YDL207W	GLE1	No	Yes
C2_07680W_A		P62913		YDR237W	MRPL7	No	Yes
C2_07940C_A	ALG7	A0A024R3H8	Q9H3H5	YBR243C	ALG7	No	Yes
C2_07960C_A	NSA1		Q6RFH5	YGL111W	NSA1	No	Yes
C2_08310W_A	TIM22	Q9Y584	Q9Y584	YDL217C	TIM22	No	Yes
C2_08560W_A	SMC2	A0A024R158	O95347	YFR031C	SMC2	No	Yes
C2_08670C_A	UTP15		Q8TED0	YMR093W	UTP15	No	Yes
C2_08760C_A	TIF4631	D3DQV9;M!06685252		YGR162W	TIF4631	No	Yes
C2_08780W_A	RPT6	P62195		YGL048C	RPT6	No	Yes
C2_08810C_A	IPP1		Q15181	YBR011C	IPP1	No	Yes
C2_08840W_A		A0A024R565	Q9UI30	YNR046W	TRM112	No	Yes
C2_08930W_A	RPN12	P48556	P48556	YFR052W	RPN12	No	Yes
C2_09160W_A			Q06265	YDR280W	RRP45	No	Yes
C2_09270C_A	SGT1	A0A024R904		YOR057W	SGT1	No	Yes
C2_09320C_A	PES1		O00541	YGR103W	NOP7	No	Yes
C2_09380W_A	RRP15	Q9Y3B9		YPR143W	RRP15	No	Yes
C2_09430W_A	RPL3	Q92901	P39023	YOR063W	RPL3	No	Yes
C2_09520C_A	CCT2	P78371	P78371	YIL142W	CCT2	No	Yes
C2_09680W_A				YIL004C	BET1	Yes	Yes
C2_09720W_A	SUP35	M!06690518	P15170	YDR172W	SUP35	No	Yes
C2_09740W_A	SSO2	Q9P2W9;Q8N4C7;O75558;P32856;Q12846;P61266;Q13277;Q16623;Q8N6V9	Q16623	YMR183C	SSO2	No	Yes
C2_09900C_A	TIM23	Q99595	O14925	YNR017W	TIM23	No	Yes
C2_10360C_A	HEM3		P08397	YDL205C	HEM3	No	Yes
C2_10680W_A				YML114C	TAF8	Yes	Yes
C2_10710W_A	TIF11	P47813	O14602;P47813	YMR260C	TIF11	No	Yes
C2_10740C_A		Q6P3X3	Q6P3X3	YNL313C	EMW1	No	Yes
C2_10760C_A		A0A024R411	Q13416	YBR060C	ORC2	No	Yes
C2_10790C_A			Q96F25	YBR070C	ALG14	No	Yes
C3_00090W_A	RPS24		P62847	YIL069C	RPS24B	No	Yes
C3_00110C_A	SEC6	A0A024QYZ6	O60645	YIL068C	SEC6	No	Yes
C3_00250C_A	TIM44	O43615	O43615	YIL022W	TIM44	No	Yes
C3_00290W_A	RPT2	P62191	P62191	YDL007W	RPT2	No	Yes
C3_00560C_A	SOF1	A0A087WT20	Q9NV06	YLL011W	SOF1	No	Yes
C3_00720W_A	PMA1			YGL008C	PMA1	Yes	Yes
C3_00770C_A	SCL1			YGL011C	SCL1	Yes	Yes
C3_00830C_A		P18858	P18858	YDL164C	CDC9	No	Yes
C3_00860W_A	CSE4			YKL049C	CSE4	Yes	Yes
C3_00880W_A	KGD1	E9PCR7	Q02218	YIL125W	KGD1	No	Yes
C3_01000W_A	BMS1	Q14692	Q14692	YPL217C	BMS1	No	Yes
C3_01560W_A		Q7L7V1	O43143	YGL120C	PRP43	No	Yes
C3_01720C_A		Q9NW08	P53621	YDL145C	COP1	No	Yes
C3_01860C_A	DBP5	F6QDS0	Q9NUU7	YOR046C	DBP5	No	Yes
C3_01990W_A	RNA1	A0A024R1U0		YMR235C	RNA1	No	Yes
C3_02020W_A		Q9Y4C8	Q9Y4C8	YPR112C	MRD1	No	Yes
C3_02110W_A	RPL12	P30050	P30050	YEL054C	RPL12A	No	Yes
C3_02130W_A	UTP4		Q969X6	YDR324C	UTP4	No	Yes
C3_02280C_A	GFA1		O94808	YKL104C	GFA1	No	Yes
C3_02320W_A	ILV2			YMR108W	ILV2	Yes	Yes
C3_02470C_A	RPL9B	P32969	P32969	YNL067W	RPL9B	No	Yes
C3_02490C_A		P51531	P51532	YIL126W	STH1	No	Yes
C3_02700W_A	SMC3	Q9UQE7	Q9UQE7	YJL074C	SMC3	No	Yes
C3_02780W_A	SES1		P49591	YDR023W	SES1	No	Yes
C3_02840W_A		Q969H6	Q969H6	YAL033W	POP5	No	Yes
C3_03260W_A		A0A024R6H0	Q9P2I0	YLR115W	CFT2	No	Yes
C3_03300C_A			Q15637	YLR116W	MSL5	No	Yes
C3_03330C_A			Q9BZJ0	YLR117C	CLF1	No	Yes
C3_03750C_A	ORC3	M!06688815	Q9UBD5	YLL004W	ORC3	No	Yes
C3_03840C_A				YOR250C	CLP1	Yes	Yes
C3_04060C_A	HEM13	P36551	P36551	YDR044W	HEM13	No	Yes
C3_04300C_A	POL1	A6NMQ1	P09884	YNL102W	POL1	No	Yes
C3_04370C_A				YJR041C	URB2	Yes	Yes
C3_04380C_A			P55769	YEL026W	SNU13	No	Yes
C3_04470W_A	PKC1	Q6VAB6	Q02156	YBL105C	PKC1	No	Yes
C3_04520C_A	ADE2			YOR128C	ADE2	Yes	Yes
C3_04560W_A	MAK21	Q03701	Q03701	YDR060W	MAK21	No	Yes
C3_04670C_A	RPS15			YOL040C	RPS15	Yes	Yes
C3_04830C_A	FAS2			YPL231W	FAS2	Yes	Yes
C3_04900W_A	NOP14	P78316	P78316	YDL148C	NOP14	No	Yes
C3_04950W_A	ARF2	A0A024R0Y6	P84077	YDL137W	ARF2	No	Yes
C3_05100C_A	RPL18	J3QQ67		YOL120C	RPL18A	No	Yes
C3_05160C_A		M!06693432	Q8TDD1	YDL031W	DBP10	No	Yes
C3_05200W_A	RPS19A			YOL121C	RPS19A	Yes	Yes
C3_05370C_A	YST1	M!06690070	P08865	YGR214W	RPS0A	No	Yes
C3_05530W_A	OST1	P04843	P04843	YJL002C	OST1	No	Yes
C3_05560W_A	PRE3	P28072	P28072	YJL001W	PRE3	No	Yes
C3_06030W_A	NOG1	D2CFK9	Q9BZE4	YPL093W	NOG1	No	Yes
C3_06500W_A	UBA1	P41226		YKL210W	UBA1	No	Yes
C3_06650C_A	TAF60	J3KR72	P49848	YGL112C	TAF6	No	Yes
C3_06700C_A				YBR238C	YBR238C	Yes	Yes
C3_06820C_A	TAF12	Q16514		NA	NA	No	No
C3_06870W_A	TDH3	A0A0K0K1K1	P04406	YGR192C	TDH3	No	Yes
C3_07110W_A		Q6UXK5		YOR373W	NUD1	No	Yes
C3_07250W_A	GCD2		Q9UI10	YGR083C	GCD2	No	Yes
C3_07410C_A	KRS1	M!06697806	Q15046	YDR037W	KRS1	No	Yes
C3_07750W_A	UTP9			YHR196W	UTP9	Yes	Yes
C3_07780C_A	NUP159			YIL115C	NUP159	Yes	Yes
C3_07800C_A				YLR051C	FCF2	Yes	Yes
C3_07950C_A	SRB1		Q9Y5P6	YDL055C	PSA1	No	Yes
C4_00140C_A	HIS4			YCL030C	HIS4	Yes	Yes
C4_00220C_A	SUB2	O00148	Q13838	YDL084W	SUB2	No	Yes
C4_00240C_A	PRO3	Q96C36		YER023W	PRO3	No	Yes
C4_00520W_A	PAM18			YLR008C	PAM18	Yes	Yes
C4_00560C_A	MMM1			YLL006W	MMM1	Yes	Yes
C4_00740W_A				YBR167C	POP7	Yes	Yes
C4_00880W_A		Q96Q11		YER168C	CCA1	No	Yes
C4_00890W_A	ARO1			YDR127W	ARO1	Yes	Yes
C4_01050C_A	RPL40B			NA	NA	Yes	No
C4_01080W_A	RAT1			YOR048C	RAT1	Yes	Yes
C4_01270W_A	RPS6A	A2A3R6		YPL090C	RPS6A	No	Yes
C4_01280C_A		A0A024R1K8		YJL203W	PRP21	No	Yes
C4_01490W_A	NIP1	A0A024QYU9	Q99613	YMR309C	NIP1	No	Yes
C4_01520C_A	RPL20B	Q02543		YOR312C	RPL20B	No	Yes
C4_01650C_A		Q7Z6E9		YKL059C	MPE1	No	Yes
C4_01680W_A	TOA2	A0A024R5Z5	P52657	YKL058W	TOA2	No	Yes
C4_01700C_A	NHP6A			YPR052C	NHP6A	Yes	Yes
C4_01740W_A	TIM12	A0A024R648	P62072	YBR091C	TIM12	No	Yes
C4_01750C_A	FBA1			YKL060C	FBA1	Yes	Yes
C4_01770W_A	POL30	P12004	P12004	YBR088C	POL30	No	Yes
C4_01870C_A	ERG8			YMR220W	ERG8	Yes	Yes
C4_01880W_A	TYR1			YBR166C	TYR1	Yes	Yes
C4_02060C_A	TFG1			YGR186W	TFG1	Yes	Yes
C4_02090C_A			Q9NPD3	YGR195W	SKI6	No	Yes
C4_02140C_A	TIM10	P62072		YHR005C-A	TIM10	No	Yes
C4_02280W_A	IDI1	M!06689585	Q13907	YPL117C	IDI1	No	Yes
C4_02430W_A		Q10570	Q10570	YDR301W	CFT1	No	Yes
C4_02460W_A		A0A024QZT7	P33947	YBL040C	ERD2	No	Yes
C4_02470C_A	PRE7	P20618		YBL041W	PRE7	No	Yes
C4_02640C_A	SEN2	A0A024R2H2	Q8NCE0	YLR105C	SEN2	No	Yes
C4_02780W_A		P50991		YDL143W	CCT4	No	Yes
C4_02790C_A	SAS10		Q9NQZ2	YDL153C	SAS10	No	Yes
C4_02830C_A	HCA4		Q13206	YJL033W	HCA4	No	Yes
C4_02980W_A	TYS1	P54577	P54577	YGR185C	TYS1	No	Yes
C4_03030C_A	NAN1	Q8IWA0	Q8IWA0	YPL126W	NAN1	No	Yes
C4_03040W_A				YOR210W	RPB10	Yes	Yes
C4_03090W_A		P52655	Q9UNN4	YOR194C	TOA1	No	Yes
C4_03130W_A		Q969N2	Q969N2	YHR188C	GPI16	No	Yes
C4_03150W_A		O75533	O75533	YMR288W	HSH155	No	Yes
C4_03790W_A	RPN6	O00231	O00231	YDL097C	RPN6	No	Yes
C4_03840C_A	RRP42	A0A024R2P7		YDL111C	RRP42	No	Yes
C4_04120C_A		P32780	P32780	YDR311W	TFB1	No	Yes
C4_04290W_A	SEC15	Q8TAG9	Q8TAG9	YGL233W	SEC15	No	Yes
C4_04900W_A	RPL30			YGL030W	RPL30	Yes	Yes
C4_05010W_A				YCR072C	RSA4	Yes	Yes
C4_05170C_A	NBP35		P53384	YGL091C	NBP35	No	Yes
C4_05330C_A				YKL021C	MAK11	Yes	Yes
C4_05340W_A		A0A024RDZ2	Q13042	YKL022C	CDC16	No	Yes
C4_05540W_A	HOM3			YER052C	HOM3	Yes	Yes
C4_05630W_A		P19387	P19387	YIL021W	RPB3	No	Yes
C4_05640C_A				YIL020C	HIS6	Yes	Yes
C4_05650W_A				YIL019W	FAF1	Yes	Yes
C4_05660C_A	BRN1	Q15003	Q15003	YBL097W	BRN1	No	Yes
C4_05760W_A	CGT1	O60942		YGL130W	CEG1	No	Yes
C4_05820W_A				YER048W-A	ISD11	Yes	Yes
C4_06030W_A	CMD1	P33763	P62158	YBR109C	CMD1	No	Yes
C4_06110C_A	TRP5	P20132		YGL026C	TRP5	No	Yes
C4_06210C_A		Q9BVP2	Q9BVP2	YER006W	NUG1	No	Yes
C4_06490C_A	PRI2	P49643	P49643	YKL045W	PRI2	No	Yes
C4_06500W_A	CDC68	Q9Y5B9	Q9Y5B9	YGL207W	SPT16	No	Yes
C4_06570C_A	PDC11			YLR044C	PDC1	Yes	Yes
C4_06720W_A	NOP1	P22087		YDL014W	NOP1	No	Yes
C4_06790W_A			Q9UHW5	YLR243W	GPN3	No	Yes
C4_06800W_A	RVB1		Q9Y265	YDR190C	RVB1	No	Yes
C4_06810C_A		Q8WVM8	Q8WVM8	YDR189W	SLY1	No	Yes
C4_06830C_A	CCT6	Q92526	P40227	YDR188W	CCT6	No	Yes
C4_06870W_A	RPT5	P17980	P17980	YOR117W	RPT5	No	Yes
C4_06930C_A	EXM2	Q9Y383	Q9Y383	YDL087C	LUC7	No	Yes
C4_07060W_A		O14802		YOR116C	RPO31	No	Yes
C4_07090C_A	TRP4			YDR354W	TRP4	Yes	Yes
C4_07100C_A		O75643	O75643	YER172C	BRR2	No	Yes
C4_07180W_A	UBI3	B2RDW1	P62979	YLR167W	RPS31	No	Yes
C4_07190W_A	SEC10	A0A0A0MSI8	O00471	YLR166C	SEC10	No	Yes
C5_00040C_A		O43292	O43292	YLR088W	GAA1	No	Yes
C5_00070W_A	CDC11			YJR076C	CDC11	Yes	Yes
C5_00110C_A	THS1	M!06691238	P26639	YIL078W	THS1	No	Yes
C5_00150C_A		M!06699855	O60684;P52294	YNL189W	SRP1	No	Yes
C5_00190C_A	FAS1			YKL182W	FAS1	Yes	Yes
C5_00200C_A	BDF1	O60885	Q58F21	YLR399C	BDF1	No	Yes
C5_00260W_A		A0A024QYY3		YKL181W	PRS1	No	Yes
C5_00300C_A	SMC4	O00291	Q9NTJ3	YLR086W	SMC4	No	Yes
C5_00370W_A	COF1			YLL050C	COF1	Yes	Yes
C5_00650C_A	THR1			YHR025W	THR1	Yes	Yes
C5_00660C_A	ERG11		Q16850	YHR007C	ERG11	No	Yes
C5_00690C_A	TFB3	A0A024R688	P51948	YDR460W	TFB3	No	Yes
C5_00770C_A	FOL1			YNL256W	FOL1	Yes	Yes
C5_00900C_A	URA4			YLR420W	URA4	Yes	Yes
C5_00920W_A		P83876	P83876	YPR082C	DIB1	No	Yes
C5_01060C_A	BUD23	M!06681818	O43709	YCR047C	BUD23	No	Yes
C5_01100C_A	CLN3			YAL040C	CLN3	Yes	Yes
C5_01240W_A	AUR1			YKL004W	AUR1	Yes	Yes
C5_01340W_A	HST3			YOR025W	HST3	Yes	Yes
C5_01510W_A	SMD3	P62318	P62318	YLR147C	SMD3	No	Yes
C5_01540W_A				YDR025W	RPS11A	Yes	Yes
C5_01580C_A	CEF3			YLR249W	YEF3	Yes	Yes
C5_01600C_A	SPB4		Q8NHQ9	YFL002C	SPB4	No	Yes
C5_01690C_A	CCT7	Q99832	Q99832	YJL111W	CCT7	No	Yes
C5_01930W_A		Q12874	Q12874	YDL030W	PRP9	No	Yes
C5_01940W_A	RIB2	Q8IZ73	Q8IZ73	YOL066C	RIB2	No	Yes
C5_01970C_A	CDC24	Q13009		YAL041W	CDC24	No	Yes
C5_02030W_A	RPN8	P51665	P51665	YOR261C	RPN8	No	Yes
C5_02070C_A				YNR054C	ESF2	Yes	Yes
C5_02120C_A	RIX7	O15381	O15381	YLL034C	RIX7	No	Yes
C5_02150C_A	ORC4	O43929	O43929	YPR162C	ORC4	No	Yes
C5_02170C_A	GCD11	A0A024RBY4	P41091	YER025W	GCD11	No	Yes
C5_02230W_A	PRE4	P28070		YFR050C	PRE4	No	Yes
C5_02270W_A	THR4	Q86YJ6	Q86YJ6	YCR053W	THR4	No	Yes
C5_02300C_A	RET2	B0YIW6	P48444	YFR051C	RET2	No	Yes
C5_02550C_A	UTP13	Q12788	Q12788	YLR222C	UTP13	No	Yes
C5_02660C_A		O00303		NA	NA	No	No
C5_03010W_A			O43290	YOR308C	SNU66	No	Yes
C5_03070W_A	RPS5		P46782	YJR123W	RPS5	No	Yes
C5_03160W_A	MED14			YLR071C	RGR1	Yes	Yes
C5_03360W_A	RPO26		P61218	YPR187W	RPO26	No	Yes
C5_03410C_A				YKR085C	MRPL20	Yes	Yes
C5_03790W_A	GUK1	O14936	Q16774	YDR454C	GUK1	No	Yes
C5_03830C_A		Q9HBM6		YMR236W	TAF9	No	Yes
C5_04090C_A	SUI1	O60739	O60739	YNL244C	SUI1	No	Yes
C5_04100W_A	CDS1	O95674	Q92903	YBR029C	CDS1	No	Yes
C5_04570C_A	URA7	P17812	P17812	YBL039C	URA7	No	Yes
C5_04590C_A	RPL43A			YPR043W	RPL43A	Yes	Yes
C5_04660C_A	TIP1	Q969M3	Q969M3	YGR172C	YIP1	No	Yes
C5_04700C_A	MES1	P56192	P56192	YGR264C	MES1	No	Yes
C5_04720C_A		A0A024R642	P30793	YGR267C	FOL2	No	Yes
C5_04750C_A	HAS1		Q9NVP1	YMR290C	HAS1	No	Yes
C5_05110C_A	TIP20	Q6NUQ1	Q6NUQ1	YGL145W	TIP20	No	Yes
C5_05120W_A	CCT3	P49368	P49368	YJL014W	CCT3	No	Yes
C5_05310W_A	PRE1	P49721	P49721	YER012W	PRE1	No	Yes
C5_05320C_A	HIS1			YER055C	HIS1	Yes	Yes
C5_05340W_A		C9JEH3	Q13685	YIR012W	SQT1	No	Yes
C5_05350W_A		P49642	P49642	YIR008C	PRI1	No	Yes
C5_05380W_A	RPN5	O00232		YDL147W	RPN5	No	Yes
C5_05490C_A	HTS1	P49590	P12081	YPR033C	HTS1	No	Yes
C6_00370C_A	NOP5		Q9Y2X3	YOR310C	NOP58	No	Yes
C6_00530C_A		P62304		YOR159C	SME1	No	Yes
C6_00550W_A				YOR158W	PET123	Yes	Yes
C6_00640C_A		Q13889	Q13889	YPR056W	TFB4	No	Yes
C6_00650C_A	RPS13			YDR064W	RPS13	Yes	Yes
C6_00670W_A	CDC14	A0A024RBC1	O60729	YFR028C	CDC14	No	Yes
C6_00870C_A	ILV5			YLR355C	ILV5	Yes	Yes
C6_01100W_A	SEC9			YGR009C	SEC9	Yes	Yes
C6_01610W_A	ANB1	Q9GZV4	P63241	YEL034W	HYP2	No	Yes
C6_01700W_A	RPL32			YBL092W	RPL32	Yes	Yes
C6_01760W_A	SEC12	P26436		YCR067C	SED4	No	Yes
C6_01890C_A		Q9NY93	Q9NY93	YLR276C	DBP9	No	Yes
C6_01920C_A				YDR228C	PCF11	Yes	Yes
C6_01970C_A	RPL25			YOL127W	RPL25	Yes	Yes
C6_02120W_A	CHC1	P53675	Q00610	YGL206C	CHC1	No	Yes
C6_02220W_A	SAR1		Q9Y6B6	YPL218W	SAR1	No	Yes
C6_02230W_A		Q9H089	Q9H089	YGL099W	LSG1	No	Yes
C6_02240C_A	RPL10A		P62906	YPL220W	RPL1A	No	Yes
C6_02260C_A	SEC27	P35606	P53621	YGL137W	SEC27	No	Yes
C6_02320C_A	IPL1		O14965	YPL209C	IPL1	No	Yes
C6_02360W_A	NIP7	Q9Y221	Q9Y221	YPL211W	NIP7	No	Yes
C6_02440C_A	PRP45			YAL032C	PRP45	Yes	Yes
C6_02520W_A	ISA1	Q9BUE6	Q86U28	YLL027W	ISA1	No	Yes
C6_02570C_A	SEC20			YDR498C	SEC20	Yes	Yes
C6_02780C_A	MIF2			YKL089W	MIF2	Yes	Yes
C6_02910W_A	POP4	O95707	O95707	YBR257W	POP4	No	Yes
C6_03120W_A	POL5	M!06696278	Q9BQG0	YEL055C	POL5	No	Yes
C6_03200W_A				NA	NA	Yes	No
C6_03210C_A		Q9H1D9	Q9H1D9	YNR003C	RPC34	No	Yes
C6_03350C_A	ARP4			YJL081C	ARP4	Yes	Yes
C6_03640W_A	NOG2			YNR053C	NOG2	Yes	Yes
C6_03720W_A	ALA1		P49588	YOR335C	ALA1	No	Yes
C6_03900W_A	NUP82			YJL061W	NUP82	Yes	Yes
C6_04160C_A	SPB1	Q8IY81	Q8IY81	YCL054W	SPB1	No	Yes
C6_04270W_A	CDC39	A5YKK6	A5YKK6	YCR093W	CDC39	No	Yes
C6_04520W_A	ILS1	P41252	P41252	YBL076C	ILS1	No	Yes
C7_00050C_A	RAD3	P18074	P18074	YER171W	RAD3	No	Yes
C7_00390W_A	SPL1		Q9Y697	YCL017C	NFS1	No	Yes
C7_00550C_A	GLN4	P47897	P47897	YOR168W	GLN4	No	Yes
C7_00570W_A	RPA135		Q9H9Y6	YPR010C	RPA135	No	Yes
C7_00620W_A	GUS1	P07814		YGL245W	GUS1	No	Yes
C7_00690W_A	NOP15	Q9BYG3	Q9BYG3	YNL110C	NOP15	No	Yes
C7_00710W_A	RPS28B			YLR264W	RPS28B	Yes	Yes
C7_00780W_A		A0A024R0R6		YAL043C	PTA1	No	Yes
C7_00960W_A	RPS18			YML026C	RPS18B	Yes	Yes
C7_01030C_A		Q5JTH9	Q5JTH9	YPL012W	RRP12	No	Yes
C7_01470C_A	PRE10		P25788	YOR362C	PRE10	No	Yes
C7_01790C_A	RPL5	A2RUM7	P46777	YPL131W	RPL5	No	Yes
C7_01810W_A	RVB2		Q9Y230	YPL235W	RVB2	No	Yes
C7_01830W_A				YPL233W	NSL1	Yes	Yes
C7_01970C_A	TOM40	A0A024R0P9	O96008	YMR203W	TOM40	No	Yes
C7_02030W_A	HSP90		P07900	YMR186W	HSC82	No	Yes
C7_02060W_A	LIG1			YJL087C	TRL1	Yes	Yes
C7_02460C_A				YJR072C	NPA3	Yes	Yes
C7_02680W_A	TOM22			YNL131W	TOM22	Yes	Yes
C7_02770W_A	CHS1			YBR038W	CHS2	Yes	Yes
C7_02780W_A		M!06692238		YGL097W	SRM1	No	Yes
C7_02790C_A	POL3			YDL102W	POL3	Yes	Yes
C7_02950C_A	DBF4			YDR052C	DBF4	Yes	Yes
C7_02980C_A	SFI1			YLL003W	SFI1	Yes	Yes
C7_03000C_A				YJL096W	MRPL49	Yes	Yes
C7_03390C_A	PUP3	P49720		YER094C	PUP3	No	Yes
C7_03400C_A		P42285	P42285	YJL050W	MTR4	No	Yes
C7_03630C_A	TIM9		Q9Y5J7	YEL020W-A	TIM9	No	Yes
C7_03660C_A		P07814		YHR020W	YHR020W	No	Yes
C7_03670W_A	DED81	O43776	O43776	YHR019C	DED81	No	Yes
C7_03720C_A	HIS7			YBR248C	HIS7	Yes	Yes
C7_03850W_A		Q8WTT2	Q8WTT2	YLR002C	NOC3	No	Yes
C7_04020C_A	PRE5	M!06692663	P25786	YMR314W	PRE5	No	Yes
C7_04130C_A	SUI3	P20042	P20042	YPL237W	SUI3	No	Yes
C7_04190C_A	UTP18	Q9Y5J1	Q9Y5J1	YJL069C	UTP18	No	Yes
C7_04270C_A	UFE1	Q9P2W9		YOR075W	UFE1	No	Yes
CR_00100C_A	EPL1			YFL024C	EPL1	Yes	Yes
CR_00460C_A		Q9NV31	Q9NV31	YHR148W	IMP3	No	Yes
CR_00510C_A	ADE1	M!06689778		YAR015W	ADE1	No	Yes
CR_00520C_A	CRM1	O43592	O14980	YGR218W	CRM1	No	Yes
CR_00580W_A	YRB1	O14715	P43487	YDR002W	YRB1	No	Yes
CR_00640W_A	ACC1	O00763	Q13085	YNR016C	ACC1	No	Yes
CR_00800C_A	PWP2	A0A024R0H7	Q15269	YCR057C	PWP2	No	Yes
CR_01140C_A	ERG27	A0A024R913	P56937	YLR100W	ERG27	No	Yes
CR_01350C_A		A0A024R0R9	P54920	YBL050W	SEC17	No	Yes
CR_01360W_A				YJR112W	NNF1	Yes	Yes
CR_01590C_A	TRP2			YER090W	TRP2	Yes	Yes
CR_01620C_A	MET6			YER091C	MET6	Yes	Yes
CR_01650W_A	URA5	A8K5J1		YML106W	URA5	No	Yes
CR_01690C_A	CDC60			YPL160W	CDC60	Yes	Yes
CR_01700C_A		Q15020	Q15020	YMR268C	PRP24	No	Yes
CR_01750C_A	SEC4		Q92930	YFL005W	SEC4	No	Yes
CR_01760C_A	FRS1	A0A024R4G1	Q9NSD9	YLR060W	FRS1	No	Yes
CR_01950W_A		Q3B726	Q3B726	YOR340C	RPA43	No	Yes
CR_01990C_A	SPC98		Q96CW5	YNL126W	SPC98	No	Yes
CR_02000C_A	HEM1		P22557	YDR232W	HEM1	No	Yes
CR_02110W_A	MCM6	Q14566	Q14566	YGL201C	MCM6	No	Yes
CR_02520W_A	RPC19		Q9Y2S0	YNL113W	RPC19	No	Yes
CR_02530W_A	DBP2		Q92841	YNL112W	DBP2	No	Yes
CR_02550C_A		Q5RKV6		YGR158C	MTR3	No	Yes
CR_02680W_A		A8K031	O14777	YIL144W	NDC80	No	Yes
CR_02710W_A	RRP9	O43818	O43818	YPR137W	RRP9	No	Yes
CR_02720C_A	RPC31			YNL151C	RPC31	Yes	Yes
CR_02860W_A	RHO1		P61586	YPR165W	RHO1	No	Yes
CR_02970C_A		P19447	P19447	YIL143C	SSL2	No	Yes
CR_02990C_A	RIB1			YBL033C	RIB1	Yes	Yes
CR_03030C_A	RPL28			YGL103W	RPL28	Yes	Yes
CR_03170W_A	DPS1-1	P14868	P14868	YLL018C	DPS1	No	Yes
CR_03200C_A		Q99575	Q99575	YNL221C	POP1	No	Yes
CR_03210C_A	SSU72	Q9NP77	Q9NP77	YNL222W	SSU72	No	Yes
CR_03270W_A	VHT1	Q9NRA2	Q9BYT1	NA	NA	No	No
CR_03360W_A		Q9Y3A2	Q9Y3A2	YKL099C	UTP11	No	Yes
CR_03600C_A		Q9P299	P61923	YPL010W	RET3	No	Yes
CR_03680C_A	SMC1	M!06691048	Q14683	YFL008W	SMC1	No	Yes
CR_03750C_A	PRP42	Q86UA1		YDR235W	PRP42	No	Yes
CR_03770C_A	RPS30			YOR182C	RPS30B	Yes	Yes
CR_03830C_A	MCM2	P49736	P49736	YBL023C	MCM2	No	Yes
CR_03930C_A				YHR036W	BRL1	Yes	Yes
CR_03990C_A	GCD1	Q9NR50	Q9NR50	YOR260W	GCD1	No	Yes
CR_04000W_A	RPT4	A0A087X2I1	P62333	YOR259C	RPT4	No	Yes
CR_04020C_A			O15182	YOR257W	CDC31	No	Yes
CR_04050C_A	MEX67		Q9UBU9	YPL169C	MEX67	No	Yes
CR_04080C_A	SEC63	Q9UGP8	Q9UGP8	YOR254C	SEC63	No	Yes
CR_04100C_A	RPL15A	A0A024R2Q4	P61313	YMR121C	RPL15B	No	Yes
CR_04110W_A		Q96HR8	Q96HR8	YNL124W	NAF1	No	Yes
CR_04140W_A				YNL137C	NAM9	Yes	Yes
CR_04170W_A			P46087	YNL061W	NOP2	No	Yes
CR_04240C_A		Q9H0A0	Q9H0A0	YNL132W	KRE33	No	Yes
CR_04380C_A	SEC26	P53618	P53618	YDR238C	SEC26	No	Yes
CR_04450C_A		Q15542	Q15542	YBR198C	TAF5	No	Yes
CR_04470W_A	GPI2	Q92535	Q92535	YPL076W	GPI2	No	Yes
CR_04520W_A	MIM1			YOL026C	MIM1	Yes	Yes
CR_04540C_A	RPR2	M!06684163	Q9H633	YIR015W	RPR2	No	Yes
CR_04550W_A	PRE6			YOL038W	PRE6	Yes	Yes
CR_04660C_A	UGP1		Q16851	YKL035W	UGP1	No	Yes
CR_04780W_A	RPB8		P52434	YOR224C	RPB8	No	Yes
CR_04810W_A	RPS3		P23396	YNL178W	RPS3	No	Yes
CR_05050W_A	GLN1	A8YXX4		YPR035W	GLN1	No	Yes
CR_05520W_A	NOC2	Q9Y3T9	Q9Y3T9	YOR206W	NOC2	No	Yes
CR_05550C_A				YOR207C	RET1	Yes	Yes
CR_05560W_A		Q92759	Q92759	YPL122C	TFB2	No	Yes
CR_05630W_A	DBP8		Q9Y6V7	YHR169W	DBP8	No	Yes
CR_05650W_A	BRF1		Q92994	YGR246C	BRF1	No	Yes
CR_05660W_A	SDA1	Q9NVU7	Q9NVU7	YGR245C	SDA1	No	Yes
CR_05700C_A		O95070	Q5BJH7	YNL263C	YIF1	No	Yes
CR_06050W_A	CDC28		P06493	YBR160W	CDC28	No	Yes
CR_06120W_A	RPL7		P18124;Q6DKI1	YNL002C	RLP7	No	Yes
CR_06150C_A	ADE13		P30566	YLR359W	ADE13	No	Yes
CR_06340C_A	PGI1		P06744	YBR196C	PGI1	No	Yes
CR_06450W_A		Q5SY16		YLL035W	GRC3	No	Yes
CR_06490C_A	HSP60		P10809	YLR259C	HSP60	No	Yes
CR_06720W_A	NMD3		Q96D46	YHR170W	NMD3	No	Yes
CR_06740W_A			Q9BSJ2	YHR172W	SPC97	No	Yes
CR_06750C_A	PUP2	P28066	P28066	YGR253C	PUP2	No	Yes
CR_06840W_A		Q68CQ4	Q68CQ4	YIL091C	UTP25	No	Yes
CR_07080W_A			P56537	YPR016C	TIF6	No	Yes
CR_07390C_A	MRPL8	Q9NRX2		YJL063C	MRPL8	No	Yes
CR_07400C_A	LPD1	A0A024R713	P09622	YFL018C	LPD1	No	Yes
CR_07510W_A				YER029C	SMB1	Yes	Yes
CR_07520C_A	YPT31			YGL210W	YPT32	Yes	Yes
CR_07630C_A	RPS27			YHR021C	RPS27B	Yes	Yes
CR_07710W_A	ARO2			YGL148W	ARO2	Yes	Yes
CR_07720C_A	CDC45			YLR103C	CDC45	Yes	Yes
CR_07750C_A		Q8N8A6	Q8N8A6	YNR038W	DBP6	No	Yes
CR_07950W_A	IMP4	Q96G21	Q96G21	YNL075W	IMP4	No	Yes
CR_08010W_A	DAD4			YDR320C-A	DAD4	Yes	Yes
CR_08020C_A	NOP10			YHR072W-A	NOP10	Yes	Yes
CR_08090W_A	SSB1			YNL209W	SSB2	Yes	Yes
CR_08150W_A	RPS20		P60866	YHL015W	RPS20	No	Yes
CR_08490W_A	TSR1	Q2NL82	Q2NL82	YDL060W	TSR1	No	Yes
CR_08630W_A	CDC23	Q9UJX2	Q9UJX2	YHR166C	CDC23	No	Yes
CR_08900C_A		Q9H0L4		YGR156W	PTI1	No	Yes
CR_08910C_A	RPN7	M!06682506	Q15008	YPR108W	RPN7	No	Yes
CR_08960C_A	MPS1	P05129	P33981	YDL028C	MPS1	No	Yes
CR_09120C_A	TUB1			YML085C	TUB1	Yes	Yes
CR_09160C_A	ERG13	A0A024R059	Q01581	YML126C	ERG13	No	Yes
CR_09380W_A	PRE8	A0A024RA52	P25787	YML092C	PRE8	No	Yes
CR_09480W_A		O43172	O43172	YPR178W	PRP4	No	Yes
CR_09800C_A		Q9BVJ6	Q9BVJ6	YML093W	UTP14	No	Yes
CR_09890C_A	BET2	P53611	P53611	YPR176C	BET2	No	Yes
CR_09950C_A	SIK1	O00567	O00567	YLR197W	NOP56	No	Yes
CR_10060W_A		Q13435		YMR240C	CUS1	No	Yes
CR_10240W_A	UTP5	Q15061		YDR398W	UTP5	No	Yes
CR_10300W_A	PUP1	P40306	Q99436	YOR157C	PUP1	No	Yes
CR_10390W_A		Q8IUR0	Q8IUR0	YDR472W	TRS31	No	Yes
CR_10410C_A			Q9NRX1	YOR145C	PNO1	No	Yes
CR_10540C_A	MCD1		O60216	YDL003W	MCD1	No	Yes
CR_10550W_A	DRS1		Q96GQ7	YLL008W	DRS1	No	Yes
CR_10580W_A	PRO1	P54886		YDR300C	PRO1	No	Yes
CR_10610C_A			Q9NYG5	YDL008W	APC11	No	Yes
CR_10680W_A	RPO21		P24928	YDL140C	RPO21	No	Yes
CR_10820W_A		P62314	P62314	YGR074W	SMD1	No	Yes
