# Supplementary material for: Leveraging machine learning essentiality predictions and chemogenomic interactions to identify antifungal targets
Source: Nat Commun. 2021 Nov 11;12:6497. doi: 10.1038/s41467-021-26850-3 (PMC8586148; doi:10.1038/s41467-021-26850-3)
Supplement: Supplementary file 7 — Supplementary Data 5 [file 41467_2021_26850_MOESM7_ESM.xlsx]

## Sheet: Summary
Supplementary Dataset 5: Putative cellular targets of pharmacologically active compounds.
Systematic name	Gene	Description	Protein	S. cerevisiae Ortholog	GRACE&GRACEv2 essentiality (1: essential, -1: nonessential)	Predicted essentiality (1: essential, -1: nonessential)	Human ortholog	Source of target	Drug name	Highest status	Bioassay hits
C4_01750C_A	FBA1	fructose-bisphosphate aldolase	Q9URB4	FBA1	1	1		PubChem			https://pubchem.ncbi.nlm.nih.gov/gene/3635585#section=BioAssays
C2_02460W_A	ERG7	lanosterol synthase	Q04782	ERG7	1	1	P48449	PubChem	Oxiconazole	Approved	https://pubchem.ncbi.nlm.nih.gov/gene/3635761#section=BioAssays
C5_01240W_A	AUR1	inositol phosphorylceramide synthase	O13332	AUR1	1	1		PubChem			https://pubchem.ncbi.nlm.nih.gov/gene/3642617#section=BioAssays
C5_00660C_A	ERG11	sterol 14-demethylase	P10613	ERG11	1	1	Q16850	PubChem; Therapeutic Target Database	Embeconazole	Phase 1	https://pubchem.ncbi.nlm.nih.gov/gene/3641571#section=BioAssays
C5_00660C_A	ERG11	sterol 14-demethylase	P10613	ERG11	1	1	Q16850	PubChem; Therapeutic Target Database	Genaconazole	Phase 1	https://pubchem.ncbi.nlm.nih.gov/gene/3641571#section=BioAssays
C5_00660C_A	ERG11	sterol 14-demethylase	P10613	ERG11	1	1	Q16850	PubChem; Therapeutic Target Database	citric acid	Investigative	https://pubchem.ncbi.nlm.nih.gov/gene/3641571#section=BioAssays
C5_00660C_A	ERG11	sterol 14-demethylase	P10613	ERG11	1	1	Q16850	PubChem; Therapeutic Target Database	Tioconazole	Approved	https://pubchem.ncbi.nlm.nih.gov/gene/3641571#section=BioAssays
C5_00660C_A	ERG11	sterol 14-demethylase	P10613	ERG11	1	1	Q16850	PubChem; Therapeutic Target Database	Abafungin	Discontinued in Phase 3	https://pubchem.ncbi.nlm.nih.gov/gene/3641571#section=BioAssays
C5_00660C_A	ERG11	sterol 14-demethylase	P10613	ERG11	1	1	Q16850	PubChem; Therapeutic Target Database	Posaconazole	Approved	https://pubchem.ncbi.nlm.nih.gov/gene/3641571#section=BioAssays
C5_00660C_A	ERG11	sterol 14-demethylase	P10613	ERG11	1	1	Q16850	PubChem; Therapeutic Target Database	ANALOGUE A	Investigative	https://pubchem.ncbi.nlm.nih.gov/gene/3641571#section=BioAssays
C5_00660C_A	ERG11	sterol 14-demethylase	P10613	ERG11	1	1	Q16850	PubChem; Therapeutic Target Database	CP-320626	Investigative	https://pubchem.ncbi.nlm.nih.gov/gene/3641571#section=BioAssays
C5_00660C_A	ERG11	sterol 14-demethylase	P10613	ERG11	1	1	Q16850	PubChem; Therapeutic Target Database	Econazole	Approved	https://pubchem.ncbi.nlm.nih.gov/gene/3641571#section=BioAssays
C5_00660C_A	ERG11	sterol 14-demethylase	P10613	ERG11	1	1	Q16850	PubChem; Therapeutic Target Database	Sertaconazole	Approved	https://pubchem.ncbi.nlm.nih.gov/gene/3641571#section=BioAssays
C5_00660C_A	ERG11	sterol 14-demethylase	P10613	ERG11	1	1	Q16850	PubChem; Therapeutic Target Database	Terconazole	Approved	https://pubchem.ncbi.nlm.nih.gov/gene/3641571#section=BioAssays
C5_00660C_A	ERG11	sterol 14-demethylase	P10613	ERG11	1	1	Q16850	PubChem; Therapeutic Target Database	Ketoconazole	Approved	https://pubchem.ncbi.nlm.nih.gov/gene/3641571#section=BioAssays
C5_00660C_A	ERG11	sterol 14-demethylase	P10613	ERG11	1	1	Q16850	PubChem; Therapeutic Target Database	EcoNail	Phase 2	https://pubchem.ncbi.nlm.nih.gov/gene/3641571#section=BioAssays
C5_00660C_A	ERG11	sterol 14-demethylase	P10613	ERG11	1	1	Q16850	PubChem; Therapeutic Target Database	Butoconazole	Approved	https://pubchem.ncbi.nlm.nih.gov/gene/3641571#section=BioAssays
C5_00660C_A	ERG11	sterol 14-demethylase	P10613	ERG11	1	1	Q16850	PubChem; Therapeutic Target Database	E-1224	Phase 2	https://pubchem.ncbi.nlm.nih.gov/gene/3641571#section=BioAssays
C5_00660C_A	ERG11	sterol 14-demethylase	P10613	ERG11	1	1	Q16850	PubChem; Therapeutic Target Database	CHLORIDE	Phase 3	https://pubchem.ncbi.nlm.nih.gov/gene/3641571#section=BioAssays
C5_00660C_A	ERG11	sterol 14-demethylase	P10613	ERG11	1	1	Q16850	PubChem; Therapeutic Target Database	Fluconazole	Approved	https://pubchem.ncbi.nlm.nih.gov/gene/3641571#section=BioAssays
C5_00660C_A	ERG11	sterol 14-demethylase	P10613	ERG11	1	1	Q16850	PubChem; Therapeutic Target Database	Itraconazole	Approved	https://pubchem.ncbi.nlm.nih.gov/gene/3641571#section=BioAssays
C5_00660C_A	ERG11	sterol 14-demethylase	P10613	ERG11	1	1	Q16850	PubChem; Therapeutic Target Database	Miconazole	Approved	https://pubchem.ncbi.nlm.nih.gov/gene/3641571#section=BioAssays
C5_00660C_A	ERG11	sterol 14-demethylase	P10613	ERG11	1	1	Q16850	PubChem; Therapeutic Target Database	Voriconazole	Approved	https://pubchem.ncbi.nlm.nih.gov/gene/3641571#section=BioAssays
C5_00660C_A	ERG11	sterol 14-demethylase	P10613	ERG11	1	1	Q16850	PubChem; Therapeutic Target Database	Luliconazole 10%	Phase 2/3	https://pubchem.ncbi.nlm.nih.gov/gene/3641571#section=BioAssays
C5_00660C_A	ERG11	sterol 14-demethylase	P10613	ERG11	1	1	Q16850	PubChem; Therapeutic Target Database	Pramiconazole	Phase 2	https://pubchem.ncbi.nlm.nih.gov/gene/3641571#section=BioAssays
C5_00660C_A	ERG11	sterol 14-demethylase	P10613	ERG11	1	1	Q16850	PubChem; Therapeutic Target Database	AZALANSTAT	Discontinued in Phase 2	https://pubchem.ncbi.nlm.nih.gov/gene/3641571#section=BioAssays
C5_00660C_A	ERG11	sterol 14-demethylase	P10613	ERG11	1	1	Q16850	PubChem; Therapeutic Target Database	Bifonazole	Approved	https://pubchem.ncbi.nlm.nih.gov/gene/3641571#section=BioAssays
C5_00660C_A	ERG11	sterol 14-demethylase	P10613	ERG11	1	1	Q16850	PubChem; Therapeutic Target Database	Efinaconazole	Approved	https://pubchem.ncbi.nlm.nih.gov/gene/3641571#section=BioAssays
C5_00660C_A	ERG11	sterol 14-demethylase	P10613	ERG11	1	1	Q16850	PubChem; Therapeutic Target Database	Luliconazole	Approved	https://pubchem.ncbi.nlm.nih.gov/gene/3641571#section=BioAssays
C5_00660C_A	ERG11	sterol 14-demethylase	P10613	ERG11	1	1	Q16850	PubChem; Therapeutic Target Database	Oxiconazole	Approved	https://pubchem.ncbi.nlm.nih.gov/gene/3641571#section=BioAssays
C2_09640W_A	PMI1	mannose-6-phosphate isomerase	P34948	PMI40	-1	1	P34949	PubChem; Therapeutic Target Database	Acetate Ion	Investigative	https://pubchem.ncbi.nlm.nih.gov/gene/3643795#section=BioAssays
C2_09640W_A	PMI1	mannose-6-phosphate isomerase	P34948	PMI40	-1	1	P34949	PubChem; Therapeutic Target Database	Formic Acid	Investigative	https://pubchem.ncbi.nlm.nih.gov/gene/3643795#section=BioAssays
C2_09640W_A	PMI1	mannose-6-phosphate isomerase	P34948	PMI40	-1	1	P34949	PubChem; Therapeutic Target Database	Sulfacetamide	Approved	https://pubchem.ncbi.nlm.nih.gov/gene/3643795#section=BioAssays
C2_09640W_A	PMI1	mannose-6-phosphate isomerase	P34948	PMI40	-1	1	P34949	PubChem; Therapeutic Target Database	Sulfoxone	Approved	https://pubchem.ncbi.nlm.nih.gov/gene/3643795#section=BioAssays
C2_09640W_A	PMI1	mannose-6-phosphate isomerase	P34948	PMI40	-1	1	P34949	PubChem; Therapeutic Target Database	GNF-PF-2272	Investigative	https://pubchem.ncbi.nlm.nih.gov/gene/3643795#section=BioAssays
C2_09640W_A	PMI1	mannose-6-phosphate isomerase	P34948	PMI40	-1	1	P34949	PubChem; Therapeutic Target Database	GNF-PF-5134	Investigative	https://pubchem.ncbi.nlm.nih.gov/gene/3643795#section=BioAssays
C2_09640W_A	PMI1	mannose-6-phosphate isomerase	P34948	PMI40	-1	1	P34949	PubChem; Therapeutic Target Database	NSC-66209	Investigative	https://pubchem.ncbi.nlm.nih.gov/gene/3643795#section=BioAssays
C2_05190W_A	CDC21	putative thymidylate synthase (alias: TMP1)	P12461	CDC21	-1	1	P04818	Therapeutic Target Database	DFP-11207	Phase 1
C2_05190W_A	CDC21	putative thymidylate synthase (alias: TMP1)	P12461	CDC21	-1	1	P04818	Therapeutic Target Database	FO-152	Discontinued in Phase 2
C2_05190W_A	CDC21	putative thymidylate synthase (alias: TMP1)	P12461	CDC21	-1	1	P04818	Therapeutic Target Database	OVI-117	Investigative
C2_05190W_A	CDC21	putative thymidylate synthase (alias: TMP1)	P12461	CDC21	-1	1	P04818	Therapeutic Target Database	Nolatrexed	Phase 3
C2_05190W_A	CDC21	putative thymidylate synthase (alias: TMP1)	P12461	CDC21	-1	1	P04818	Therapeutic Target Database	Floxuridine	Approved
C2_05190W_A	CDC21	putative thymidylate synthase (alias: TMP1)	P12461	CDC21	-1	1	P04818	Therapeutic Target Database	3-DIPHENOL-6-NITRO-3H-BENZO[DE]ISOCHROMEN-1-ONE	Investigative
C2_05190W_A	CDC21	putative thymidylate synthase (alias: TMP1)	P12461	CDC21	-1	1	P04818	Therapeutic Target Database	6-ETHYL-5-PHENYLPYRIMIDINE-2,4-DIAMINE	Investigative
C2_05190W_A	CDC21	putative thymidylate synthase (alias: TMP1)	P12461	CDC21	-1	1	P04818	Therapeutic Target Database	Methionine Sulfoxide	Investigative
C2_05190W_A	CDC21	putative thymidylate synthase (alias: TMP1)	P12461	CDC21	-1	1	P04818	Therapeutic Target Database	Ciprofloxacin XR	Approved
C2_05190W_A	CDC21	putative thymidylate synthase (alias: TMP1)	P12461	CDC21	-1	1	P04818	Therapeutic Target Database	NB1011	Phase 1/2
C2_05190W_A	CDC21	putative thymidylate synthase (alias: TMP1)	P12461	CDC21	-1	1	P04818	Therapeutic Target Database	Capecitabine	Approved
C2_05190W_A	CDC21	putative thymidylate synthase (alias: TMP1)	P12461	CDC21	-1	1	P04818	Therapeutic Target Database	PREMETREXED	Phase 2
C2_05190W_A	CDC21	putative thymidylate synthase (alias: TMP1)	P12461	CDC21	-1	1	P04818	Therapeutic Target Database	Flucytosine	Approved
C2_05190W_A	CDC21	putative thymidylate synthase (alias: TMP1)	P12461	CDC21	-1	1	P04818	Therapeutic Target Database	(6s)-5,6,7,8-Tetrahydrofolate	Investigative
C2_05190W_A	CDC21	putative thymidylate synthase (alias: TMP1)	P12461	CDC21	-1	1	P04818	Therapeutic Target Database	1,4-Dithiothreitol	Investigative
C2_05190W_A	CDC21	putative thymidylate synthase (alias: TMP1)	P12461	CDC21	-1	1	P04818	Therapeutic Target Database	10-Propargyl-5,8-Dideazafolic Acid	Investigative
C2_05190W_A	CDC21	putative thymidylate synthase (alias: TMP1)	P12461	CDC21	-1	1	P04818	Therapeutic Target Database	2'-Deoxycytidine-5'-Monophosphate	Investigative
C2_05190W_A	CDC21	putative thymidylate synthase (alias: TMP1)	P12461	CDC21	-1	1	P04818	Therapeutic Target Database	2'-Deoxyguanosine-5'-Monophosphate	Investigative
C2_05190W_A	CDC21	putative thymidylate synthase (alias: TMP1)	P12461	CDC21	-1	1	P04818	Therapeutic Target Database	2'-Deoxyuridine	Investigative
C2_05190W_A	CDC21	putative thymidylate synthase (alias: TMP1)	P12461	CDC21	-1	1	P04818	Therapeutic Target Database	2'-deoxyuridylic acid	Investigative
C2_05190W_A	CDC21	putative thymidylate synthase (alias: TMP1)	P12461	CDC21	-1	1	P04818	Therapeutic Target Database	2-Sulfhydryl-Ethanol	Investigative
C2_05190W_A	CDC21	putative thymidylate synthase (alias: TMP1)	P12461	CDC21	-1	1	P04818	Therapeutic Target Database	5,10-Methylene-6-Hydrofolic Acid	Investigative
C2_05190W_A	CDC21	putative thymidylate synthase (alias: TMP1)	P12461	CDC21	-1	1	P04818	Therapeutic Target Database	5-Fluoro-2'-Deoxyuridine-5'-Monophosphate	Investigative
C2_05190W_A	CDC21	putative thymidylate synthase (alias: TMP1)	P12461	CDC21	-1	1	P04818	Therapeutic Target Database	Ly231514 Tetra Glu	Investigative
C2_05190W_A	CDC21	putative thymidylate synthase (alias: TMP1)	P12461	CDC21	-1	1	P04818	Therapeutic Target Database	LY341770	Investigative
C2_05190W_A	CDC21	putative thymidylate synthase (alias: TMP1)	P12461	CDC21	-1	1	P04818	Therapeutic Target Database	N,O-Didansyl-L-Tyrosine	Investigative
C2_05190W_A	CDC21	putative thymidylate synthase (alias: TMP1)	P12461	CDC21	-1	1	P04818	Therapeutic Target Database	N-[Tosyl-D-Prolinyl]Amino-Ethanethiol	Investigative
C2_05190W_A	CDC21	putative thymidylate synthase (alias: TMP1)	P12461	CDC21	-1	1	P04818	Therapeutic Target Database	N-Carboxymethionine	Investigative
C2_05190W_A	CDC21	putative thymidylate synthase (alias: TMP1)	P12461	CDC21	-1	1	P04818	Therapeutic Target Database	S,S-(2-Hydroxyethyl)Thiocysteine	Investigative
C2_05190W_A	CDC21	putative thymidylate synthase (alias: TMP1)	P12461	CDC21	-1	1	P04818	Therapeutic Target Database	Sp-722	Investigative
C2_05190W_A	CDC21	putative thymidylate synthase (alias: TMP1)	P12461	CDC21	-1	1	P04818	Therapeutic Target Database	Sp-876	Investigative
C2_05190W_A	CDC21	putative thymidylate synthase (alias: TMP1)	P12461	CDC21	-1	1	P04818	Therapeutic Target Database	Thymidine-5'-Phosphate	Investigative
C2_05190W_A	CDC21	putative thymidylate synthase (alias: TMP1)	P12461	CDC21	-1	1	P04818	Therapeutic Target Database	Tosyl-D-Proline	Investigative
C2_05190W_A	CDC21	putative thymidylate synthase (alias: TMP1)	P12461	CDC21	-1	1	P04818	Therapeutic Target Database	Uridine-5'-Monophosphate	Investigative
C2_05190W_A	CDC21	putative thymidylate synthase (alias: TMP1)	P12461	CDC21	-1	1	P04818	Therapeutic Target Database	Plevitrexed	Phase 2
C2_05190W_A	CDC21	putative thymidylate synthase (alias: TMP1)	P12461	CDC21	-1	1	P04818	Therapeutic Target Database	Plevitrexed (R)-isomer	Phase 2
C2_05190W_A	CDC21	putative thymidylate synthase (alias: TMP1)	P12461	CDC21	-1	1	P04818	Therapeutic Target Database	Trifluridine	Approved
C2_05190W_A	CDC21	putative thymidylate synthase (alias: TMP1)	P12461	CDC21	-1	1	P04818	Therapeutic Target Database	Fosfluridine tidoxil	Terminated
C2_05190W_A	CDC21	putative thymidylate synthase (alias: TMP1)	P12461	CDC21	-1	1	P04818	Therapeutic Target Database	EMITEFUR	Discontinued in Preregistration
C2_05190W_A	CDC21	putative thymidylate synthase (alias: TMP1)	P12461	CDC21	-1	1	P04818	Therapeutic Target Database	Pemetrexed	Approved
C2_05190W_A	CDC21	putative thymidylate synthase (alias: TMP1)	P12461	CDC21	-1	1	P04818	Therapeutic Target Database	1,3-propanediphosphonic acid	Investigative
C2_05190W_A	CDC21	putative thymidylate synthase (alias: TMP1)	P12461	CDC21	-1	1	P04818	Therapeutic Target Database	2'-5'dideoxyuridine	Investigative
C2_05190W_A	CDC21	putative thymidylate synthase (alias: TMP1)	P12461	CDC21	-1	1	P04818	Therapeutic Target Database	2-bromophenol	Investigative
C2_05190W_A	CDC21	putative thymidylate synthase (alias: TMP1)	P12461	CDC21	-1	1	P04818	Therapeutic Target Database	4-CHLORO-3',3''-DIBROMOPHENOL-1,8-NAPHTHALEIN	Investigative
C2_05190W_A	CDC21	putative thymidylate synthase (alias: TMP1)	P12461	CDC21	-1	1	P04818	Therapeutic Target Database	UFT/leucovorin calcium	Phase 2
C2_05190W_A	CDC21	putative thymidylate synthase (alias: TMP1)	P12461	CDC21	-1	1	P04818	Therapeutic Target Database	DMPDDF	Terminated
C2_05190W_A	CDC21	putative thymidylate synthase (alias: TMP1)	P12461	CDC21	-1	1	P04818	Therapeutic Target Database	3-Amino-5,6-dihydro-2H-benzo[f]quinazolin-1-one	Investigative
C2_05190W_A	CDC21	putative thymidylate synthase (alias: TMP1)	P12461	CDC21	-1	1	P04818	Therapeutic Target Database	3-Methyl-2H-benzo[f]quinazolin-1-one	Investigative
C2_05190W_A	CDC21	putative thymidylate synthase (alias: TMP1)	P12461	CDC21	-1	1	P04818	Therapeutic Target Database	GALOCITABINE	Discontinued in Phase 3
C2_05190W_A	CDC21	putative thymidylate synthase (alias: TMP1)	P12461	CDC21	-1	1	P04818	Therapeutic Target Database	ZD1604	Investigative
C2_05190W_A	CDC21	putative thymidylate synthase (alias: TMP1)	P12461	CDC21	-1	1	P04818	Therapeutic Target Database	AG-331	Discontinued in Phase 1
C2_05190W_A	CDC21	putative thymidylate synthase (alias: TMP1)	P12461	CDC21	-1	1	P04818	Therapeutic Target Database	TT-62	Discontinued in Phase 2
C2_05190W_A	CDC21	putative thymidylate synthase (alias: TMP1)	P12461	CDC21	-1	1	P04818	Therapeutic Target Database	Fluorouracil	Approved
C2_05190W_A	CDC21	putative thymidylate synthase (alias: TMP1)	P12461	CDC21	-1	1	P04818	Therapeutic Target Database	Leucovorin/5-fluorouracil	Approved
C2_05190W_A	CDC21	putative thymidylate synthase (alias: TMP1)	P12461	CDC21	-1	1	P04818	Therapeutic Target Database	Raltitrexed	Approved
C2_05190W_A	CDC21	putative thymidylate synthase (alias: TMP1)	P12461	CDC21	-1	1	P04818	Therapeutic Target Database	CB-3717	Investigative
C1_08590C_A	ERG1	squalene epoxidase, epoxidation of squalene to 2,3(S)-oxidosqualene	Q92206	ERG1	1	1	Q14534	Therapeutic Target Database	Butenafine	Approved
C1_08590C_A	ERG1	squalene epoxidase, epoxidation of squalene to 2,3(S)-oxidosqualene	Q92206	ERG1	1	1	Q14534	Therapeutic Target Database	Terbinafine	Approved
C2_03100W_A	EFT2	Elongation Factor 2 (eEF2); GTPase; essential; highly expressed; target of sordarin antifungals	Q5A0M4	EFT1	1	1	P13639	Therapeutic Target Database	Adenosine-5-Diphosphoribose	Investigative
C2_03100W_A	EFT2	Elongation Factor 2 (eEF2); GTPase; essential; highly expressed; target of sordarin antifungals	Q5A0M4	EFT1	1	1	P13639	Therapeutic Target Database	Guanosine-5'-Diphosphate	Investigative
C2_03100W_A	EFT2	Elongation Factor 2 (eEF2); GTPase; essential; highly expressed; target of sordarin antifungals	Q5A0M4	EFT1	1	1	P13639	Therapeutic Target Database	Diphthamide	Investigative
CR_01690C_A	CDC60	cytosolic leucyl tRNA synthetase	Q9HGT2	CDC60	1	1		Candida Genome Database (CGD)	Tavaborole	Approved
