# Supplementary material for: Leveraging machine learning essentiality predictions and chemogenomic interactions to identify antifungal targets
Source: Nat Commun. 2021 Nov 11;12:6497. doi: 10.1038/s41467-021-26850-3 (PMC8586148; doi:10.1038/s41467-021-26850-3)
Supplement: Supplementary file 8 — Supplementary Data 6 [file 41467_2021_26850_MOESM8_ESM.xlsx]

## Sheet: NBCC00037_comparisonview
Supplementary Dataset 6: Mass spectrometry analysis; Krp1 interactome.
				ENO1_BR2	ENO1_BR1	KRP1_BR1	KRP2_BR2
Gene ID	Gene Name	LocusTag	Protein ID	Total Peptide Number	Total Peptide Number	Total Peptide Number	Total Peptide Number
3643310	NPL3	CAALFM_C114280CA	XP_715038.1	288	391	446	361
3641752	DED1	CAALFM_C306100CA	XP_716633.1	232	247	185	135
3642887	NOP1	CaO19.10650	XP_715517.1	231	257	284	186
3642548	CaO19.10345	CaO19.10345	XP_715808.1	205	194
3647974	CAALFM_C604120CA	CAALFM_C604120CA	XP_710427.1	200	203
3638925	SIK1	CAALFM_CR09950CA	XP_719331.1	192	186	164	131
3639947	CaO19.10805	CaO19.10805	XP_718387.1	179	157
3636654	CAALFM_C302160CA	CAALFM_C302160CA	XP_721707.1	171	181	140	82
3640757	TEF3	CaO19.5119	XP_717655.1	164	161	132	239
3647692	DBP2	CAALFM_CR02530WA	XP_710708.1	155	168	120	65
3646084	NOP5	CAALFM_C600370CA	XP_712316.1	151	147	140	93
3647103	CAALFM_CR09520CA	CAALFM_CR09520CA	XP_711309.1	150	122
3645922	NOP58	CaO19.8790	XP_712460.1	149	145
3638744	RFA1	CaO19.9640	XP_719663.1	141	132
3642095	SSB1	CAALFM_CR08090WA	XP_716208.1	132	140	135	178
3642613	NUF2	CAALFM_C501280CA	XP_715704.1	132	124
3647643	RPA190	CaO19.9397	XP_710761.1	117	122	78	100
3635191	ZCF31	CAALFM_C304640WA	XP_723136.1	115	95	43	17
3647637	CBF5	CaO19.9391	XP_710755.1	105	122	72	46
3635820	CAALFM_C202540WA	CAALFM_C202540WA	XP_722620.1	103	105	70	103
3644653	SSA2	CaO19.8667	XP_713714.1	94	91	45	53
3637996	RPA135	CAALFM_C700570WA	XP_720354.1	91	101	55	62
3644635	HTB2	CaO19.8654	XP_713701.1	91	83	20	16
3643345	CAALFM_C114080WA	CAALFM_C114080WA	XP_715016.1	89	94	33	22
3637053	CAALFM_C701830WA	CAALFM_C701830WA	XP_721375.1	86	97
3643715	MTW1	CaO19.8947	XP_714637.1	77	80
3640713	FUN12	CAALFM_C108090CA	XP_717619.1	75	92	104	103
3646476	GCR3	CaO19.8017	XP_711904.1	75	86	2
3639378	RPO41	CAALFM_C100640CA	XP_719003.1	75	68
3639917	TIF1	CaO19.10834	XP_718416.1	74	72	35	21
3636073	HSP70	CaO19.12447	XP_722300.1	72	64		43
3647355	CaO19.9399	CaO19.9399	XP_711026.1	72	75
3634868	DBP3	CAALFM_C110030WA	XP_723554.1	71	77	96	83
3642741	SPT16	CaO19.10402	XP_715596.1	69	72	8	15
3643506	RFA2	CAALFM_C207120WA	XP_714857.1	68	69
3647314	CAALFM_CR06920WA	CAALFM_CR06920WA	XP_711070.1	67	66
3639341	CAALFM_C100160CA	CAALFM_C100160CA	XP_719050.1	66	56	62	57
3646200	CaO19.13949	CaO19.13949	XP_712168.1	65	67
3647719	RPL3	CAALFM_C209430WA	XP_710682.1	64	59	19	15
3636302	YTA7	CaO19.11431	XP_722018.1	64	52
3638718	NDT801	CaO19.9667	XP_719690.1	61	69	40	13
3636573	RPS7A	CAALFM_C301490WA	XP_721772.1	61	61	45	33
3636891	CAALFM_C103370WA	CAALFM_C103370WA	XP_721535.1	61	55	15	3
P00761	P00761		P00761	59	60	56	57
3643130	SUI3	CAALFM_C704130CA	XP_715210.1	58	79	86	82
3640028	NNF1	CaO19.10055	XP_718287.1	58	51
3644647	HHF1	CaO19.8661	XP_713708.1	58	67	11	7
3641504	CaO19.8591	CaO19.8591	XP_716874.1	56	61	28
3641247	RPS4A	CAALFM_C210620WA	XP_717144.1	56	65	40
3636022	KEM1	CaO19.12434	XP_722291.1	56	55	13	29
3635198	RPL8B	CAALFM_C305240CA	XP_723211.1	55	46	33	19
3635447	CaO19.12145	CaO19.12145	XP_722890.1	55	48
3636924	RPS1	CAALFM_C103090WA	XP_721500.1	55	62	50	56
3635280	SBP1	CAALFM_C304090WA	XP_723070.1	53	40	8	5
3635147	MAK21	CAALFM_C304560WA	XP_723125.1	53	58	21	15
3635760	UTP22	CAALFM_C202450CA	XP_722611.1	53	47	33	41
3635732	CAALFM_C201730WA	CAALFM_C201730WA	XP_722533.1	53	52
3635172	CAALFM_C304370CA	CAALFM_C304370CA	XP_723100.1	52	43	5
3637928	CAALFM_C403080WA	CAALFM_C403080WA	XP_720437.1	52	24
3644034	TOP1	CAALFM_C600950CA	XP_714305.1	51	49	3	5
3848	KRT1		P04264	51	296	26	28
3641072	CaO19.11268	CaO19.11268	XP_717268.1	51	35
3639078	MIF2	CaO19.12997	XP_719231.1	50	45
3638764	KAR2	CaO19.9564	XP_719590.1	49	58	42	81
3640848	CaO19.8143	CaO19.8143	XP_717465.1	49	59	35	43
3647454	SRB1	CAALFM_C307950CA	XP_710946.1	49	51	35	23
3639765	RIM1	CaO19.10019	XP_718587.1	48	47
3637619	GCD11	CaO19.11699	XP_720662.1	47	77	73	89
3643347	RPL4B	CAALFM_C114110CA	XP_715018.1	47	49	17	21
3647287	RPS3	CaO19.13689	XP_711114.1	47	42	28	18
3638023	RPP0	CAALFM_C700990WA	XP_720309.1	45	43	17	14
3642722	TOP2	CaO19.10391	XP_715586.1	43	35
3635827	POB3	CAALFM_C202380WA	XP_722602.1	43	41		9
3638019	CAALFM_C701030CA	CAALFM_C701030CA	XP_720305.1	42	43	14	14
3646217	HMO1	CaO19.13966	XP_712185.1	42	43	33	51
3637932	NAN1	CAALFM_C403030CA	XP_720441.1	41	40	23	26
3635540	BFR1	CaO19.12029	XP_722778.1	41	63	108	150
3639047	CaO19.12956	CaO19.12956	XP_719192.1	41	43
3645536	CaO19.14166	CaO19.14166	XP_712835.1	40	33	38	22
3636361	HAS1	CaO19.11444	XP_722031.1	40	41	30	20
3635746	CAALFM_C202120WA	CAALFM_C202120WA	XP_722572.1	40	37		10
3858	KRT10		P13645	39	109	33	22
3642886	RPO3	CaO19.10615	XP_715482.1	39	38
3645843	RPL1	CaO19.10969	XP_712535.1	38	41	17	5
3642069	DCP2	CAALFM_CR08120CA	XP_716213.1	38	30
3644105	PES1	CAALFM_C209320CA	XP_714264.1	38	40	26	21
3644671	CaO19.8649	CaO19.8649	XP_713696.1	38	28	11	5
3647040	CEF3	CAALFM_C501580CA	XP_711356.1	37		68	160
3638290	STH1	CaO19.7869	XP_720068.1	37	26
3647006	CEF3	CaO19.11629	XP_711404.1	37	71	68	161
3637055	RVB2	CAALFM_C701810WA	XP_721377.1	37	32
3636319	CaO19.11504	CaO19.11504	XP_722090.1	36	27
3636657	UTP4	CAALFM_C302130WA	XP_721710.1	36	33	27	27
3635173	CAALFM_C304380CA	CAALFM_C304380CA	XP_723101.1	35	24	20	20
3635543	CaO19.12032	CaO19.12032	XP_722781.1	35	31	8	7
3644252	ISW1	CaO19.11916	XP_714082.1	35	42	7	29
3641531	PET9	CaO19.8545	XP_716829.1	34	33	13	7
3640416	PWP2	CAALFM_CR00800CA	XP_717966.1	34	24	13	6
3640442	CAALFM_CR00700WA	CAALFM_CR00700WA	XP_717975.1	34	26
3647585	CaO19.13272	CaO19.13272	XP_710816.1	34	32	26	26
3647528	CAALFM_C104970WA	CAALFM_C104970WA	XP_710862.1	34	86	117	187
3857	KRT9		P35527	33	209		21
3638767	RPA49	CaO19.9567	XP_719593.1	33	29	20	22
3639569	SUI2	CAALFM_C106960WA	XP_718803.1	33	43	54	68
3637636	CaO19.11744	CaO19.11744	XP_720704.1	33	22	15	11
3638540	TDH3	CAALFM_C306870WA	XP_719909.1	33	35	20	28
3638922	UTP5	CAALFM_CR10240WA	XP_719361.1	32	32	11	13
3638451	UTP9	CAALFM_C307750WA	XP_719810.1	32	31	20	17
3642864	RVB1	CaO19.10641	XP_715508.1	32	31
3634792	MSS116	CAALFM_C108810CA	XP_723426.1	32	9
3643306	CAALFM_C114240WA	CAALFM_C114240WA	XP_715034.1	32	25
3641258	SGS1	CAALFM_C210570WA	XP_717138.1	31	35
3635251	CAALFM_C304740CA	CAALFM_C304740CA	XP_723146.1	30	19
3640547	UTP8	CAALFM_C300330WA	XP_717808.1	30	33	29	26
3635615	RPL20B	CAALFM_C401520CA	XP_722704.1	30	30	16	14
3646054	PIF1	CAALFM_CR07360WA	XP_712340.1	30	19
3637570	RPS5	CaO19.11812	XP_720769.1	29	27	19	14
3644340	CaO19.9855	CaO19.9855	XP_713982.1	29	24	34	23
3639551	RPS22A	CAALFM_C106460CA	XP_718852.1	28	30	30	28
3647691	CaO19.170	CaO19.170	XP_710707.1	28	31	33	21
3636053	CaO19.12424	CaO19.12424	XP_722281.1	28	22
3646290	NOP8	CAALFM_C604330WA	XP_712104.1	28	20	4
3643382	RPC40	CaO19.11048	XP_714986.1	27	27	25	17
3640762	DIP2	CAALFM_C108290CA	XP_717643.1	27	25	10	12
3643465	DAD2	CAALFM_C205210WA	XP_714910.1	27	25
3636841	RPL13	CAALFM_C103020CA	XP_721492.1	27	32	12	6
3638670	CaO19.9617	CaO19.9617	XP_719641.1	26	11
3647558	RPL23A	CAALFM_C602070CA	XP_710842.1	26	24	39	29
3645550	RFC1	CaO19.14180	XP_712849.1	26	29	15	28
3641073	RPL24	CaO19.11269	XP_717269.1	26	37	17	12
3635787	RPS26A	CAALFM_C201610CA	XP_722520.1	26	20	11	6
3646423	SPC19	CAALFM_C103980WA	XP_711967.1	26	23
3646484	ENO1	CaO19.8025	XP_711912.1	25	23	3137	2643
3646152	EDC3	CAALFM_C405190CA	XP_712246.1	25	22	2
3639967	RPS2	CaO19.10845	XP_718427.1	25	31	15	10
3634765	YTM1	CAALFM_C109510WA	XP_723501.1	25	21	11	9
3646472	CaO19.8030	CaO19.8030	XP_711917.1	25	22	10	24
3647980	NOP4	CaO19.12665	XP_710417.1	25	24	18	7
3646651	CaO19.10294	CaO19.10294	XP_711742.1	25	26	3
3643847	CaO19.11092	CaO19.11092	XP_714502.1	24	30	8	10
3644646	FPR3	CaO19.8632	XP_713680.1	24	27	23	29
3638287	RPL9	CaO19.7866	XP_720065.1	24	22	21	16
3645441	CAALFM_C204570WA	CAALFM_C204570WA	XP_712918.1	24	20	10	11
3637979	CAALFM_C700250CA	CAALFM_C700250CA	XP_720388.1	24	24	30	30
3645186	CaO19.9452	CaO19.9452	XP_713199.1	24	28	5	16
3638209	HTZ1	CaO19.7959	XP_720154.1	24	25
3644634	HTA2	CaO19.8653	XP_713700.1	24	26	10	8
3645164	CaO19.9458	CaO19.9458	XP_713205.1	24	20	5	5
3636659	RPL12	CAALFM_C302110WA	XP_721712.1	24	22	15	6
3636951	HSP90	CAALFM_C702030WA	XP_721353.1	24	17	4	6
3644972	ATP2	CaO19.13098	XP_713381.1	24	16
3634820	DAM1	CAALFM_C109730WA	XP_723523.1	24	15
3639338	RPL16A	CAALFM_C100180WA	XP_719047.1	23	24	15	4
3643409	CDC19	CaO19.11059	XP_714997.1	23	23	11	6
3641736	NOG1	CAALFM_C306030WA	XP_716625.1	23	13
3647582	CaO19.13269	CaO19.13269	XP_710813.1	23	20
3641035	SSZ1	CaO19.11293	XP_717293.1	22	45	54	106
3647750	CSE4	CAALFM_C300860WA	XP_710644.1	22	25
3645298	GAR1	CaO19.8757	XP_713063.1	22	21	33	23
3644667	POR1	CaO19.8644	XP_713692.1	22	6
3645658	HTA1	CAALFM_C303910WA	XP_712725.1	22	26	13	6
3635757	UTP21	CAALFM_C202430WA	XP_722608.1	21	21	4	10
3640926	RPL15	CaO19.8123	XP_717445.1	21	22	13	7
3635456	PWP1	CaO19.12110	XP_722858.1	21	13	4	17
3639053	CaO19.13050	CaO19.13050	XP_719282.1	21	21		4
3636636	CAALFM_C302260CA	CAALFM_C302260CA	XP_721698.1	21	28
3635156	RPL18	CAALFM_C305100CA	XP_723193.1	21	20	7	6
3636828	CAALFM_C102750CA	CAALFM_C102750CA	XP_721463.1	21	13
3637230	NOP12	CaO19.8429	XP_721055.1	21	22	2	3
3647328	CaO19.11188	CaO19.11188	XP_711056.1	21	20
3646206	VMA2	CaO19.13955	XP_712174.1	21	12	5
3643489	RPL11	CAALFM_C206810CA	XP_714823.1	21	23	17	20
3635476	RPS6	CaO19.12130	XP_722877.1	20	20	14	14
3639801	BMS1	CaO19.10040	XP_718605.1	20	21	2	6
3642509	RRP9	CaO19.10348	XP_715811.1	20	21	15	11
3638001	CAALFM_C700520WA	CAALFM_C700520WA	XP_720359.1	20	42	58	85
6335362	RPL7	CAALFM_CR06120WA	XP_441054.1	20	16	14	17
3647912	MPP10	CAALFM_C200070CA	XP_710480.1	20		20
3636557	GFA1	CAALFM_C302280CA	XP_721697.1	19	17	4
3637939	RFC2	CAALFM_C700820WA	XP_720328.1	19	20	10	15
3643880	TIF4631	CAALFM_C208760CA	XP_714443.1	19	16
3646816	RPG1A	CAALFM_C112770WA	XP_711563.1	19
3639513	CAALFM_C106600WA	CAALFM_C106600WA	XP_718839.1	19	31	31	19
3636387	ADH1	CaO19.11480	XP_722066.1	19	26	12	10
3636030	ACT1	CaO19.12474	XP_722325.1	19	14	2	8
3645713	GAG1	CaO19.9907	XP_712681.1	19	21	20	22
3634818	CAALFM_C109710CA	CAALFM_C109710CA	XP_723521.1	19	20	9	7
3642538	SRP40	CaO19.10377	XP_715840.1	19	18	13	11
3644059	CIC1	CAALFM_C601170WA	XP_714330.1	18	19	11
3635194	RPS15	CAALFM_C304670CA	XP_723139.1	18	20	16	12
3644649	HHT1	CaO19.8663	XP_713710.1	18	21
3640568	RPS24	CAALFM_C300090WA	XP_717837.1	18	22	16	6
3639740	KAP123	CaO19.10025	XP_718593.1	18	19	3
3636959	PRT1	CAALFM_C701450CA	XP_721420.1	18	14	3	21
3639808	CaO19.10010	CaO19.10010	XP_718578.1	18	8
3641489	NAM7	CaO19.8554	XP_716838.1	18	17
3647429	RFC3	CaO19.10723	XP_710962.1	17	14	13	15
3643358	MAK5	CaO19.11024	XP_714962.1	17	7	5	2
3640585	SOF1	CAALFM_C300560CA	XP_717779.1	17	14	5	6
3644742	CBC2	CaO19.8383	XP_713608.1	17	10	8	7
3645908	CAALFM_C701270CA	CAALFM_C701270CA	XP_712479.1	17	16
3639769	ARP9	CaO19.10043	XP_718608.1	17	18
3636669	CAALFM_C301560WA	CAALFM_C301560WA	XP_721764.1	17	18	15	27
3645295	SVL3	CaO19.8732	XP_713042.1	16	17	15	17
3644384	UTP6	CaO19.9866	XP_713993.1	16	15	4	7
3647872	CAALFM_C500150CA	CAALFM_C500150CA	XP_710511.1	16	15		2
3648425	CaO19.37	CaO19.37	XP_709976.1	16	13
3646134	ATP1	CAALFM_C104610WA	XP_712242.1	16	10	4	4
3643365	CaO19.11031	CaO19.11031	XP_714969.1	16	10	6
3641598	CAALFM_C601890CA	CAALFM_C601890CA	XP_716703.1	16	17	13
3645844	CaO19.10970	CaO19.10970	XP_712536.1	16	10
3638785	RFC5	CaO19.9577	XP_719603.1	16	16	13
3639490	DHH1	CAALFM_C107070CA	XP_718788.1	16	15	4	3
3637266	AMD1	CaO19.8510	XP_721133.1	16	34	42	81
3635847	SPT5	CAALFM_C201480WA	XP_722503.1	16	11		2
3635435	NIP1	CaO19.12105	XP_722853.1	16	15	3	17
3643504	CAALFM_C207100WA	CAALFM_C207100WA	XP_714855.1	15	14
3640246	CAALFM_C603550CA	CAALFM_C603550CA	XP_718060.1	15	14	17	12
3642724	CBF1	CaO19.10394	XP_715588.1	15	15		4
3634782	MIR1	CAALFM_C110160WA	XP_723568.1	15	8
3641648	ANB1	CAALFM_C601610WA	XP_716733.1	15	19	28	103
3645187	CaO19.9453	CaO19.9453	XP_713200.1	15	13
3637953	RPS18	CAALFM_C700960WA	XP_720312.1	15	16	11	5
3647601	CHR1	CAALFM_C112600CA	XP_710786.1	15	15	6	5
3645532	RPS8	CaO19.14162	XP_712831.1	15	16	11	10
3641207	CAALFM_C210700CA	CAALFM_C210700CA	XP_717153.1	15	10
3638950	TRX1	CAALFM_CR10350CA	XP_719372.1	15	17	12	3
3638984	CAALFM_CR09800CA	CAALFM_CR09800CA	XP_719314.1	14	22	23	30
3639942	ARP8	CaO19.10867	XP_718449.1	14	18
3641194	NCE4	CAALFM_C210450WA	XP_717123.1	14	13
3642519	RPC82	CaO19.10366	XP_715829.1	14	13
3640714	DRG1	CAALFM_C108100WA	XP_717620.1	14	17	9	16
3644754	CaO19.8395	CaO19.8395	XP_713620.1	14	10
3644522	KRR1	CaO19.8277	XP_713834.1	14	16	13	7
3641930	TUB1	CAALFM_CR09120CA	XP_716442.1	14	10	5	4
3637908	ZUO1	CAALFM_C402870CA	XP_720460.1	14	41	58	84
3704165	CaJ7_0366	CaO19_5137.5	XP_888925.1	14	15	11	11
3636810	BMH1	CAALFM_C103220CA	XP_721512.1	14	11		6
3642247	CAALFM_C306700CA	CAALFM_C306700CA	XP_716120.1	13	8		3
3643699	SGN11	CaO19.8967	XP_714655.1	13	15	11
3636311	CaO19.11461	CaO19.11461	XP_722048.1	13	10	4	2
3635266	NOP14	CAALFM_C304900WA	XP_723170.1	13	17	7	7
3642998	EFT2	CAALFM_C203100WA	XP_715329.1	13	13	2	10
3634872	CAALFM_C109670CA	CAALFM_C109670CA	XP_723516.1	13	14
3642767	CaO19.10434	CaO19.10434	XP_715626.1	13	12	4	10
3642725	CaO19.10395	CaO19.10395	XP_715589.1	13	13	4	2
3636872	TIF34	CAALFM_C102790WA	XP_721466.1	13	5	3	11
3641090	CaO19.11312	CaO19.11312	XP_717311.1	13	10	16	15
3642311	KRE30	CAALFM_C208000CA	XP_716024.1	13	19	20	59
3639329	TUB2	CAALFM_C100710CA	XP_718996.1	12	11	9	4
3646972	RPS25B	CAALFM_C503540CA	XP_711416.1	12	15	12	13
3643359	SUP45	CaO19.11025	XP_714963.1	12	10		5
3643123	UTP18	CAALFM_C704190CA	XP_715203.1	12	13	7	8
3643394	RPF2	CaO19.11036	XP_714974.1	12	11	3	7
3639131	ARP4	CaO19.13069	XP_719300.1	12	18
3637227	RPL21	CaO19.8460	XP_721086.1	12	14	8	6
3634883	RPA34	CAALFM_C110260CA	XP_723578.1	12	14	15	16
3640872	NHP2	CaO19.8159	XP_717481.1	12	8	12	31
3644738	SEC21	CaO19.8379	XP_713604.1	12	9
3637222	CaO19.8455	CaO19.8455	XP_721081.1	12	8
3645439	RPL17B	CAALFM_C204600CA	XP_712916.1	12	13	8	3
3636588	CAALFM_C301770CA	CAALFM_C301770CA	XP_721745.1	11	11
3638739	DPB4	CaO19.9635	XP_719658.1	11	8
3640706	CAALFM_C107790CA	CAALFM_C107790CA	XP_717587.1	11	10	3	7
3636850	RPL10	CAALFM_C102460WA	XP_721434.1	11	13	5	3
3849	KRT2		P35908	11	109	19	9
3639085	RBF1	CaO19.13004	XP_719238.1	11	8
3637966	NOP15	CAALFM_C700690WA	XP_720342.1	11	12	5	7
Q9U6Y5	Q9U6Y5		Q9U6Y5	11
3637899	SAS10	CAALFM_C402790CA	XP_720467.1	11	10	6	8
3641798	CaO19.1226	CaO19.1226	XP_716534.1	11	15
3644809	CaO19.11352	CaO19.11352	XP_713537.1	11	10
3636089	MYO2	CaO19.12482	XP_722333.1	11	7
3643728	CaO19.8966	CaO19.8966	XP_714654.1	11	8	5	6
3636552	ILV2	CAALFM_C302320WA	XP_721692.1	11	6
3643923	SET2	CAALFM_C210250CA	XP_714401.1	10	7	15	10
3644138	IMP4	CAALFM_CR07950WA	XP_714230.1	10	14	5	5
3646337	CAM1	CaO19.10174	XP_712054.1	10	6	3	24
3641520	CaO19.8577	CaO19.8577	XP_716860.1	10	11	16	19
3648140	CAALFM_CR04720CA	CAALFM_CR04720CA	XP_710254.1	10	9
3636714	KRI1	CaO19.9177	XP_721568.1	10
3643831	CaO19.11082	CaO19.11082	XP_714492.1	10
3647816	CaO19.8798	CaO19.8798	XP_710572.1	10	16
3637234	CaO19.8433	CaO19.8433	XP_721059.1	10	8
3644597	CAALFM_C102240WA	CAALFM_C102240WA	XP_713775.1	10	12
3642235	ISW2	CAALFM_C306310CA	XP_716066.1	10	6
3637911	HCA4	CAALFM_C402830CA	XP_720463.1	10	11	7	14
3638981	EIF4E	CAALFM_CR10490WA	XP_719387.1	10	14	9	18
3639813	SSE1	CaO19.9971	XP_718541.1	10	5		9
3647156	SNL1	CaO19.8612	XP_711238.1	9	6
3643937	CYC1	CAALFM_C210110WA	XP_714415.1	9	13	15	29
3645545	CaO19.14175	CaO19.14175	XP_712844.1	9	13	19	25
3646459	GCD6	CaO19.8037	XP_711924.1	9	7	4	6
3644966	SUB2	CaO19.13092	XP_713375.1	9	7	3
3636889	CAALFM_C103360WA	CAALFM_C103360WA	XP_721533.1	9	10	6	13
3645711	URA2	CaO19.9896	XP_712670.1	9	4
3647461	CAALFM_C307800CA	CAALFM_C307800CA	XP_710931.1	9	7	4	5
3636856	CAALFM_C103310WA	CAALFM_C103310WA	XP_721525.1	9	5
3638994	RFC4	CAALFM_CR10700WA	XP_719417.1	9	19	8	17
3638979	CAALFM_CR10470CA	CAALFM_CR10470CA	XP_719385.1	9	5	3	8
3636883	HFL1	CAALFM_C103640CA	XP_721561.1	9	6
3647964	CAALFM_CR07080WA	CAALFM_CR07080WA	XP_710434.1	9	6	3
3639726	CAALFM_CR00460CA	CAALFM_CR00460CA	XP_718645.1	9	11	8	7
3638933	AHA1	CAALFM_CR10270CA	XP_719364.1	9	5
3637056	PFK2	CAALFM_C701800CA	XP_721378.1	9	5
6335358	CAALFM_CR06060WA	CAALFM_CR06060WA	XP_441044.1	9	9	12
3642848	UBI3	CaO19.10599	XP_715467.1	9	8	7	4
3635162	CAALFM_C305150WA	CAALFM_C305150WA	XP_723199.1	9	10	9	3
3643026	ALD5	CAALFM_C202970CA	XP_715347.1	8
3642071	RPS20	CAALFM_CR08150WA	XP_716215.1	8	7	9	4
3639724	MRPL6	CAALFM_CR00480WA	XP_718643.1	8	7	13	16
3640912	NOP2	CaO19.8131	XP_717453.1	8	6	2	7
3641903	ELF1	CAALFM_CR09370WA	XP_716466.1	8	6		8
3647257	GLC7	CAALFM_CR07650WA	XP_711142.1	8	8	11	16
3641748	PBS2	CAALFM_C306070CA	XP_716629.1	8
3634785	CAALFM_C110190WA	CAALFM_C110190WA	XP_723571.1	8	6	7	5
3636570	CAALFM_C301520CA	CAALFM_C301520CA	XP_721769.1	8	12	9	15
3639008	CAALFM_CR09740WA	CAALFM_CR09740WA	XP_719308.1	8	12	10	16
3644666	CaO19.8643	CaO19.8643	XP_713691.1	8	6
3643857	RRP8	CaO19.11113	XP_714521.1	8	7	6	5
3637898	RPC53	CAALFM_C402800WA	XP_720466.1	8	7
3647038	PGK1	CaO19.11135	XP_711371.1	8	32	27	87
3640708	CAALFM_C107810CA	CAALFM_C107810CA	XP_717589.1	8	4
3636601	CAALFM_C301720CA	CAALFM_C301720CA	XP_721749.1	8	2
3635546	POL30	CaO19.12086	XP_722834.1	8
3639045	DRS1	CAALFM_CR10550WA	XP_719395.1	8	8	2	15
3639311	CAALFM_C100510WA	CAALFM_C100510WA	XP_719019.1	8	11	9	10
3861	KRT14		P02533	8	186
3852	KRT5		P13647	8	178	6
3645845	SEC27	CaO19.10971	XP_712537.1	8	5
3643477	RPA12	CAALFM_C207300CA	XP_714876.1	8	9		18
3640733	CAALFM_C108160WA	CAALFM_C108160WA	XP_717630.1	8	5
3640716	CAALFM_C108110WA	CAALFM_C108110WA	XP_717622.1	8	7
3639647	RPS23	CaO19.13632	XP_718756.1	8	9	5
3638752	NPL6	CaO19.9602	XP_719628.1	7	8
3637592	STB4	CaO19.11764	XP_720724.1	7	2
3641913	CAALFM_CR08930CA	CAALFM_CR08930CA	XP_716425.1	7	4
3638772	RSC4	CaO19.9589	XP_719615.1	7	4
3640044	RPA43	CaO19.10125	XP_718354.1	7	5	3	3
3640862	CDC31	CaO19.8115	XP_717437.1	7	3
3635723	CAALFM_C201370CA	CAALFM_C201370CA	XP_722491.1	7	6
3645853	HRR25	CaO19.10980	XP_712545.1	7
3638438	RPS12	CAALFM_C307150CA	XP_719881.1	7	8	6	5
3637954	YML6	CAALFM_C700950WA	XP_720313.1	7
3645840	SAR1	CaO19.10966	XP_712532.1	7	2
3637223	CaO19.8456	CaO19.8456	XP_721082.1	7	3
3642853	MSH2	CaO19.10605	XP_715472.1	7	8
3645285	CaO19.8736	CaO19.8736	XP_713046.1	7	6
3636820	MGM101	CAALFM_C102660CA	XP_721455.1	7	5		2
3642263	APN1	CAALFM_C306430WA	XP_716092.1	7	6		10
3637887	CAALFM_C403290WA	CAALFM_C403290WA	XP_720417.1	7	6
3646858	DUO1	CAALFM_C404220WA	XP_711555.1	7	8
3648018	SLB2	CaO19.10659	XP_710381.1	7	8	11	26
3639324	CCT8	CAALFM_C100110WA	XP_719058.1	7	9	20	38
3639090	RNH12	CaO19.13010	XP_719243.1	7	6
3639719	CAALFM_CR00280CA	CAALFM_CR00280CA	XP_718663.1	7
3880	KRT19		P08727	7		6
3639714	NAP1	CAALFM_CR00320CA	XP_718658.1	6	4
3636564	DBP5	CAALFM_C301860CA	XP_721738.1	6	7
3645597	CaO19.11640	CaO19.11640	XP_712768.1	6	12	16	36
3645798	CAALFM_C208910CA	CAALFM_C208910CA	XP_712600.1	6	4
3645699	CaO19.9898	CaO19.9898	XP_712672.1	6	4	6	3
3646609	ECM32	CaO19.8321	XP_711793.1	6	3	5	14
3647953	UTP20	CaO19.10668	XP_710448.1	6	2	2	2
3636287	EST1	CaO19.11527	XP_722113.1	6	5	2	8
3635552	CaO19.12092	CaO19.12092	XP_722840.1	6	11	18	37
3643031	CAALFM_C202770WA	CAALFM_C202770WA	XP_715369.1	6
3646234	ENP2	CAALFM_C703540CA	XP_712139.1	6	2
3646473	TCP1	CaO19.8031	XP_711918.1	6	19	31	57
3635257	RPL19A	CAALFM_C304500CA	XP_723118.1	6	6	5	4
3646935	MAK11	CaO19.9357	XP_711456.1	6	21	18	35
3636327	CCT3	CaO19.11487	XP_722073.1	6	10	10	24
3637312	TAF14	CaO19.8418	XP_721044.1	6	5		7
3645929	CaO19.8780	CaO19.8780	XP_712451.1	6	4
3645855	NIP7	CaO19.10982	XP_712547.1	6	4
3647861	ENP1	CAALFM_C703700CA	XP_710535.1	6	5
3634893	IDH1	CAALFM_C109630WA	XP_723512.1	6	4
3637958	CAALFM_C700910CA	CAALFM_C700910CA	XP_720317.1	6	5		4
3641650	CAALFM_C601590WA	CAALFM_C601590WA	XP_716735.1	6	6	6	19
3640531	PMA1	CAALFM_C300720WA	XP_717759.1	6	4
3639037	ZCF39	CAALFM_CR10070CA	XP_719345.1	6	9		7
3638502	CAALFM_C306760WA	CAALFM_C306760WA	XP_719920.1	6	4
3644526	NEP1	CaO19.8282	XP_713838.1	6	5
3642258	CAALFM_C306370CA	CAALFM_C306370CA	XP_716087.1	6	3
3641208	TIF11	CAALFM_C210710WA	XP_717154.1	6	10	14	11
3641365	CAALFM_C703270WA	CAALFM_C703270WA	XP_716951.1	6	5	3	2
3639102	MRT4	CaO19.12996	XP_719230.1	6	3	2
3643513	CAALFM_C207190CA	CAALFM_C207190CA	XP_714864.1	6	6
3639054	RPC34	CaO19.13051	XP_719283.1	6	7
3639018	CKA1	CAALFM_CR10660WA	XP_719411.1	6	10	9	12
3643103	MAM33	CAALFM_C703930CA	XP_715236.1	6	4
3645460	CAALFM_C204370WA	CAALFM_C204370WA	XP_712942.1	6	5		8
3643003	CAALFM_C202710CA	CAALFM_C202710CA	XP_715375.1	6	7	5	7
3647606	CDC54	CAALFM_C112550CA	XP_710791.1	5	2
3638770	HXT63	CaO19.9570	XP_719596.1	5	4
3647879	CAALFM_C500030WA	CAALFM_C500030WA	XP_710527.1	5	4	4	9
3638985	CAALFM_CR09810WA	CAALFM_CR09810WA	XP_719315.1	5	3
3635841	CAALFM_C201420CA	CAALFM_C201420CA	XP_722497.1	5	2
3636481	CAALFM_C504340WA	CAALFM_C504340WA	XP_721830.1	5	11	8
3643626	CCT7	CaO19.10718	XP_714755.1	5	4	5	16
3637057	RPL5	CAALFM_C701790CA	XP_721379.1	5	9
3639369	TUP1	CAALFM_C100060WA	XP_719068.1	5	2
3642414	RPC25	CaO19.8073	XP_715928.1	5	3
3646900	MAK16	CaO19.12955	XP_711515.1	5	3
3639282	SIN3	CAALFM_C100930CA	XP_718973.1	5	5
3641959	BRX1	CaO19.12697	XP_716363.1	5	5
3644014	CAALFM_C601040CA	CAALFM_C601040CA	XP_714316.1	5	5	6	7
3643827	RPT6	CaO19.11075	XP_714488.1	5	4
3637851	CAALFM_C402400CA	CAALFM_C402400CA	XP_720513.1	5
3645157	RCL1	CaO19.9442	XP_713189.1	5	7		2
3638512	TPD3	CAALFM_C306910CA	XP_719905.1	5	6
3647085	SSF1	CAALFM_CR09730CA	XP_711291.1	5	2
3640541	BUD21	CAALFM_C300370CA	XP_717802.1	5	7	4	13
3703883	CaJ7_0319	CaO19_5182	XP_888889.1	5	8	16	34
3640767	TKL1	CAALFM_C108320WA	XP_717648.1	5
3647289	RPB8	CaO19.13691	XP_711116.1	5
3642656	VPS1	CAALFM_C501210WA	XP_715712.1	5
3637599	TIF5	CaO19.11737	XP_720697.1	5	9	29	36
3635229	CAALFM_C305160CA	CAALFM_C305160CA	XP_723201.1	5		2	6
3645904	CAALFM_C701210CA	CAALFM_C701210CA	XP_712475.1	5	4
3642861	CCT6	CaO19.10638	XP_715505.1	4	10	10	20
3636825	CAALFM_C102720WA	CAALFM_C102720WA	XP_721460.1	4	5
3639134	CaO19.13072	CaO19.13072	XP_719303.1	4	2
3647733	MEC1	CAALFM_C504060CA	XP_710664.1	4
3638029	GUS1	CAALFM_C700620WA	XP_720349.1	4	23	43	91
3639557	CAALFM_C106400CA	CAALFM_C106400CA	XP_718858.1	4
3636612	CAALFM_C301210CA	CAALFM_C301210CA	XP_721802.1	4
3636613	CaO19.1732	CaO19.1732	XP_721803.1	4
3648397	RRP15	CAALFM_C209380WA	XP_710002.1	4	5
3639352	RRS1	CAALFM_C100900WA	XP_718976.1	4	2
3636561	CAALFM_C301890CA	CAALFM_C301890CA	XP_721735.1	4	7	17	17
3636863	YKT6	CAALFM_C102860CA	XP_721473.1	4
3640064	LYS12	CaO19.10060	XP_718292.1	4	3
3635284	EGD2	CAALFM_C304140CA	XP_723074.1	4	8	19	55
3640891	SEC26	CaO19.8161	XP_717483.1	4
3635730	HSK3	CAALFM_C201710WA	XP_722531.1	4	4
3640391	BUD22	CAALFM_CR00680WA	XP_717977.1	4
3640883	YDJ1	CaO19.8136	XP_717458.1	4	8	3	7
3639507	NOP6	CAALFM_C106740CA	XP_718825.1	4	7	5	12
3641256	GCN1	CAALFM_C210550CA	XP_717136.1	4	3
3647807	UTP30	CaO19.7793	XP_710591.1	4	7	5	18
3636592	CAALFM_C302020WA	CAALFM_C302020WA	XP_721723.1	4	4	3	8
3642510	RPC31	CaO19.10349	XP_715812.1	4	5
3635548	FBA1	CaO19.12088	XP_722836.1	4	6
3639360	TUF1	CAALFM_C100590WA	XP_719009.1	4
3638942	CAALFM_CR10750CA	CAALFM_CR10750CA	XP_719423.1	4	5	8	6
3646330	RPO26	CaO19.10166	XP_712047.1	4	4
3647437	CaO19.10731	CaO19.10731	XP_710970.1	4	2
3643622	CaO19.10670	CaO19.10670	XP_714709.1	4		9
3645249	CaO19.8348	CaO19.8348	XP_713111.1	4	2
3645163	MCM3	CaO19.9457	XP_713204.1	4	2
3647123	RAD52	CaO19.11684	XP_711283.1	4	4
3637902	CAALFM_C402780WA	CAALFM_C402780WA	XP_720470.1	4	5	12	23
3645072	CaO19.9922	CaO19.9922	XP_713270.1	4	7	5	2
3638957	CAALFM_CR10410CA	CAALFM_CR10410CA	XP_719379.1	4	4	2	2
3644963	CaO19.13116	CaO19.13116	XP_713399.1	4
3638917	CAALFM_CR10180WA	CAALFM_CR10180WA	XP_719356.1	4	3
3646151	ELC1	CAALFM_C104550WA	XP_712237.1	4	7
3638539	CAALFM_C306880WA	CAALFM_C306880WA	XP_719908.1	4
3644489	SMT3	CaO19.8287	XP_713843.1	4	2
3638769	MRPL16	CaO19.9569	XP_719595.1	4	2		3
3646894	GSP1	CaO19.12948	XP_711509.1	4			7
3645841	LSG1	CaO19.10967	XP_712533.1	4	5	8	14
3636839	RPP1A	CAALFM_C103010WA	XP_721490.1	4	4
3645792	CAALFM_C209040WA	CAALFM_C209040WA	XP_712585.1	4	10	10	22
3644272	SKP1	CaO19.11905	XP_714072.1	4	5	3	4
3645407	CAALFM_C101800WA	CAALFM_C101800WA	XP_712969.1	4	4
3645426	CAALFM_C101900CA	CAALFM_C101900CA	XP_712958.1	4	11	21	32
3647552	CHC1	CAALFM_C602120WA	XP_710836.1	4	4
3638011	CAALFM_C700070CA	CAALFM_C700070CA	XP_720406.1	4	12	18	36
DECOY9600	DECOY9600		DECOY9600	3
3638677	NIC96	CaO19.9553	XP_719580.1	3	3
3645593	RLP24	CaO19.11668	XP_712796.1	3	5	3	3
3641354	CaO19.5126	CaO19.5126	XP_716949.1	3	3
3646429	CAALFM_C104040CA	CAALFM_C104040CA	XP_711973.1	3	5	5	16
3638529	CAALFM_C307480WA	CAALFM_C307480WA	XP_719838.1	3	8	20	24
3640722	MRPL3	CAALFM_C107910CA	XP_717602.1	3
3641646	TIF3	CAALFM_C601630WA	XP_716731.1	3	2	10	13
3641644	TRA1	CAALFM_C601320WA	XP_716758.1	3	3
3644899	CaO19.11208	CaO19.11208	XP_713449.1	3	5	6	5
3642762	CaO19.10419	CaO19.10419	XP_715612.1	3	3
3645780	CDC47	CAALFM_C209020WA	XP_712587.1	3
3645438	CAALFM_C204620WA	CAALFM_C204620WA	XP_712915.1	3
3642236	DOT1	CAALFM_C306300WA	XP_716067.1	3	4
3646999	CaO19.11619	CaO19.11619	XP_711394.1	3	3	7	11
3646810	DOT4	CAALFM_C403440CA	XP_711590.1	3	3	5	7
3640880	RRF1	CaO19.8108	XP_717430.1	3	11	13	28
3641652	CAALFM_C601560WA	CAALFM_C601560WA	XP_716737.1	3	2
3641888	MPS1	CAALFM_CR08960CA	XP_716428.1	3
3635195	RPP2B	CAALFM_C304680WA	XP_723140.1	3	4
3641881	ERG13	CAALFM_CR09160CA	XP_716446.1	3	3
3635854	CAALFM_C202090WA	CAALFM_C202090WA	XP_722569.1	3
3639106	SRP72	CaO19.12962	XP_719198.1	3	12	39	44
3643292	RPC10	CAALFM_C114390WA	XP_715053.1	3	5		2
3646888	CDC46	CaO19.12942	XP_711503.1	3
3636830	CDC73	CAALFM_C102920WA	XP_721481.1	3	10	19	27
3636614	UTP20	CaO19.1733	XP_721804.1	3	3
3643678	YST1	CAALFM_C305370CA	XP_714681.1	3	5	3
3636633	CAALFM_C301430WA	CAALFM_C301430WA	XP_721779.1	3		4	7
3638941	CAALFM_CR10740WA	CAALFM_CR10740WA	XP_719422.1	3	5		5
3643671	TEA1	CAALFM_C305470WA	XP_714691.1	3	4
3642979	IDH2	CAALFM_C203080WA	XP_715332.1	3	4
3635833	RAD7	CAALFM_C201840CA	XP_722541.1	3	3
3646638	LHP1	CaO19.10313	XP_711761.1	3
3639067	NAB3	CaO19.12976	XP_719211.1	3	3	3
3647641	TBP1	CaO19.9395	XP_710759.1	3
3636794	GSC1	CAALFM_C102420CA	XP_721429.1	3	2
3641814	CAALFM_C405650WA	CAALFM_C405650WA	XP_716558.1	3			3
3643641	NAT1	CaO19.10695	XP_714733.1	3	9	16	43
3636978	CYP1	CAALFM_C702380CA	XP_721313.1	3	8
3641076	CaO19.11272	CaO19.11272	XP_717272.1	3	2
3641493	BDF1	CaO19.8593	XP_716876.1	2	2	6	27
3641186	PDB1	CAALFM_C404150CA	XP_717098.1	2			2
3639946	MBF1	CaO19.10804	XP_718386.1	2	4	12	16
3646280	CAALFM_C604290WA	CAALFM_C604290WA	XP_712099.1	2
3647550	CTF5	CAALFM_C602130CA	XP_710834.1	2	3
3643101	UME1	CAALFM_C703960CA	XP_715234.1	2	2
3647886	CAALFM_C500080CA	CAALFM_C500080CA	XP_710518.1	2
3637587	CaO19.11759	CaO19.11759	XP_720719.1	2	2		3
3634929	RTG1	CAALFM_C108640WA	XP_723409.1	2
3643197	MCM2	CAALFM_CR03830CA	XP_715131.1	2
3643149	SLA2	CAALFM_C703810WA	XP_715249.1	2	2	20	25
3642284	AAF1	CAALFM_C306470WA	XP_716097.1	2
3648087	TRP5	CAALFM_C406110CA	XP_710312.1	2
3644981	CaO19.13102	CaO19.13102	XP_713385.1	2	2
3641737	CAALFM_C305880CA	CAALFM_C305880CA	XP_716609.1	2
3637289	GCD7	CaO19.8445	XP_721071.1	2	2		2
3641041	MRP8	CaO19.11325	XP_717324.1	2
3638710	CKB1	CaO19.9650	XP_719673.1	2		2	4
3637248	MRPL35	CaO19.8482	XP_721107.1	2
3641478	XDJ1	CaO19.8569	XP_716852.1	2
3641767	CAALFM_C107690CA	CAALFM_C107690CA	XP_716539.1	2
3641796	CAALFM_C405900CA	CAALFM_C405900CA	XP_716585.1	2	2
3636370	CaO19.11410	CaO19.11410	XP_721998.1	2
3641977	CaO19.12699	CaO19.12699	XP_716365.1	2	3
3645174	SWR1	CaO19.9427	XP_713174.1	2
3640921	MEX67	CaO19.8118	XP_717440.1	2
3640299	NOG2	CAALFM_C603640WA	XP_718070.1	2			2
3641370	ZCF29	CAALFM_C703220CA	XP_716956.1	2
3636874	RAD16	CAALFM_C102810WA	XP_721468.1	2
3637019	CAALFM_C702120CA	CAALFM_C702120CA	XP_721341.1	2	3		11
3645907	ASC1	CAALFM_C701250WA	XP_712478.1	2	2
3641743	CTA4	CAALFM_C305930WA	XP_716615.1	2	2
3646430	CaO19.4480	CaO19.4480	XP_711974.1	2			5
3853	KRT6A		P02538		192
3868	KRT16		P08779		188
3854	KRT6B		P04259		187
3872	KRT17		Q04695		88
3866	KRT15		P19012		68
16666	Krt16		Q3ZAW8		61
101117682	LOC101117682		K1C15_SHEEP		60
3850	KRT3		P12035		56
51350	KRT76		Q01546		48
3851	KRT4		P19013		30
16669	Krt19		P19001		29
3647941	MPP10	CaO19.9471	XP_710461.1		24		17
374454	KRT77		Q7Z794		23
196374	KRT78		Q7RTT2		21
3642770	CaO19.10437	CaO19.10437	XP_715629.1		19	19	35
388697	HRNR		Q86YZ3		18
16664	Krt14		Q61782		16
3645050	DPS1	CaO19.9945	XP_713293.1		15	23	68
3646756	RPG1	CaO19.13701	XP_711631.1		12	5	19
3636888	RLI1	CAALFM_C103350CA	XP_721532.1		11	18	53
192666	KRT24		Q2M2I5		11
3645306	EGD1	CaO19.8746	XP_713053.1		10	12	38
3636846	CAALFM_C102430CA	CAALFM_C102430CA	XP_721430.1		9	9	63
GFP_AEQVI	GFP_AEQVI		GFP_AEQVI		8	73	62
3645092	ARC1	CaO19.9960	XP_713308.1		8	24	51
DECOY2347	DECOY2347		DECOY2347		7	5
3637276	GPM1	CaO19.8522	XP_721143.1		7
3640854	NCL1	CaO19.8149	XP_717471.1		7	10	49
3643478	CCT5	CAALFM_C207310WA	XP_714877.1		7	16	31
3636618	CAALFM_C302350WA	CAALFM_C302350WA	XP_721688.1		6	5
3642884	CaO19.10613	CaO19.10613	XP_715480.1		5
3636348	CaO19.11525	CaO19.11525	XP_722111.1		5	4	9
3643851	PAF1	CaO19.11096	XP_714506.1		5	23	30
3644364	CaO19.9846	CaO19.9846	XP_713973.1		5
3645617	YAP180	CaO19.11660	XP_712788.1		5	10	13
3640904	RAD27	CaO19.8182	XP_717504.1		5	5	18
3641727	RCT1	CAALFM_C305710WA	XP_716591.1		5	4	4
3644124	CAALFM_C500780CA	CAALFM_C500780CA	XP_714208.1		5	5	8
3637023	CAALFM_C702100WA	CAALFM_C702100WA	XP_721345.1		5	3	21
3640005	SEC65	CaO19.10089	XP_718320.1		4	5	19
3641495	CaO19.8595	CaO19.8595	XP_716878.1		4	5	20
3645422	CAALFM_C101940CA	CAALFM_C101940CA	XP_712954.1		4	4	8
3638248	APL5	CaO19.7879	XP_720078.1		4	8	21
3646480	ECM22	CaO19.8021	XP_711908.1		4
3639138	SRC1	CaO19.13015	XP_719248.1		4
DECOY4260	DECOY4260		DECOY4260		4
3637963	CaO19.7047	CaO19.7047	XP_720339.1		4
3636910	CAALFM_C103450CA	CAALFM_C103450CA	XP_721545.1		4
3644657	CaO19.8634	CaO19.8634	XP_713682.1		4
3637246	CaO19.8480	CaO19.8480	XP_721105.1		3
3641345	CAALFM_C703160WA	CAALFM_C703160WA	XP_716962.1		3
3636084	DIM1	CaO19.12477	XP_722328.1		3		11
3643746	CAALFM_C502070CA	CAALFM_C502070CA	XP_714579.1		3		7
3640907	MSH1	CaO19.8126	XP_717448.1		3		9
388698	FLG2		Q5D862		3
3640915	ARP5	CaO19.8134	XP_717456.1		3
3645858	CaO19.10985	CaO19.10985	XP_712550.1		3	2	12
3642556	DAL80	CaO19.10361	XP_715824.1		3
3643373	CKA2	CaO19.11014	XP_714952.1		3	5	6
3636039	CHA4	CaO19.12465	XP_722317.1		3
3645903	DBP7	CAALFM_C701200CA	XP_712474.1		3
3635196	CAALFM_C304690CA	CAALFM_C304690CA	XP_723141.1		2
3636359	CaO19.11442	CaO19.11442	XP_722029.1		2	11	17
3646135	CAALFM_C104620WA	CAALFM_C104620WA	XP_712243.1		2		6
3642000	CAF120	CaO19.12739	XP_716405.1		2
3638469	NOP13	CAALFM_C307300WA	XP_719862.1		2
3647823	CaO19.8806	CaO19.8806	XP_710579.1		2	2	23
3644096	PMT4	CAALFM_C206100WA	XP_714280.1		2
3634802	CAALFM_C109330WA	CAALFM_C109330WA	XP_723479.1		2	2	9
3646973	CAALFM_C503550WA	CAALFM_C503550WA	XP_711417.1		2
3642723	CaO19.10393	CaO19.10393	XP_715587.1		2		23
3636913	AGE1	CAALFM_C103480CA	XP_721548.1		2	2	7
3640377	SRP54	CAALFM_CR01110WA	XP_717934.1		2	16	24
3640703	PFY1	CAALFM_C108030WA	XP_717614.1		2
3638456	ABD1	CAALFM_C307710WA	XP_719815.1		2
3642269	TSA1	CAALFM_C306180CA	XP_716082.1		2
3643002	CAALFM_C202720WA	CAALFM_C202720WA	XP_715374.1		2
3645373	CAALFM_C403560WA	CAALFM_C403560WA	XP_709962.1		2	4	5
3646466	GCV2	CaO19.8015	XP_711902.1		2	9	50
3643191	SGD1	CAALFM_CR03650WA	XP_715139.1		2
3646220	CaO19.13969	CaO19.13969	XP_712188.1		2	5	11
3637992	GBP2	CAALFM_C700440CA	XP_720367.1		2
3638506	CAALFM_C306970WA	CAALFM_C306970WA	XP_719899.1			21	36
3704041	CaJ7_0085	CaO19_7047	XP_888703.1			17	30
3637656	CKB2	CaO19.11773	XP_720732.1			15	7
3646191	DBP8	CaO19.13973	XP_712192.1			8	18
3644759	SLB1	CaO19.8400	XP_713625.1			8	20
3643685	CCT2	CaO19.8980	XP_714667.1			8	24
3640066	CaO19.10062	CaO19.10062	XP_718294.1			7	27
3638444	HHT1	CAALFM_C307090WA	XP_719887.1			7	6
3640873	HST7	CaO19.8100	XP_717423.1			7	16
3645430	CAALFM_C101860WA	CAALFM_C101860WA	XP_712962.1			6	13
3639978	CaO19.10096	CaO19.10096	XP_718327.1			6	4
3648338	VAS1	CaO19.8875	XP_710062.1			6	58
3636083	KEL3	CaO19.12476	XP_722327.1			5	19
3647824	RVS167	CaO19.8807	XP_710580.1			5	7
3643280	RIM101	CAALFM_C114340CA	XP_715047.1			5	6
3638956	CAALFM_CR10400WA	CAALFM_CR10400WA	XP_719378.1			5	16
3639995	CaO19.10114	CaO19.10114	XP_718344.1			5	15
3645924	DIA4	CaO19.8792	XP_712462.1			5	12
3643722	SUP35	CaO19.8958	XP_714648.1			4	16
3645462	CAALFM_C204500WA	CAALFM_C204500WA	XP_712928.1			4	31
3636293	HTS1	CaO19.11533	XP_722119.1			4	28
3647730	SUI1	CAALFM_C504090CA	XP_710661.1			4	8
3647731	CAALFM_C504080CA	CAALFM_C504080CA	XP_710662.1			3
3645087	SMC5	CaO19.9955	XP_713303.1			3	17
3636572	BZZ1	CAALFM_C301500CA	XP_721771.1			3	7
3648125	CAALFM_CR05310WA	CAALFM_CR05310WA	XP_710277.1			3	7
3640724	CAALFM_C107950CA	CAALFM_C107950CA	XP_717604.1			3
3644827	CaO19.11365	CaO19.11365	XP_713550.1			3	2
3647882	THS1	CAALFM_C500110CA	XP_710514.1			3	54
3648174	SPB1	CaO19.7727	XP_710229.1			3	10
3637641	CaO19.11749	CaO19.11749	XP_720709.1			2	2
3636342	APM1	CaO19.11519	XP_722105.1			2	5
3641911	CAALFM_CR08920WA	CAALFM_CR08920WA	XP_716423.1			2
3639940	CaO19.10865	CaO19.10865	XP_718447.1			2	6
3639122	POL5	CaO19.13042	XP_719274.1			2	4
3637039	SMC6	CAALFM_C701580WA	XP_721404.1			2	21
3638005	RVS161	CAALFM_C700020CA	XP_720414.1			2	8
3639937	RPS42	CaO19.10862	XP_718444.1				46
3638486	KRS1	CAALFM_C307410CA	XP_719846.1				33
3636253	MES1	CaO19.11437	XP_722024.1				26
3642228	HSP104	CaO19.13747	XP_716146.1				25
3647828	CAALFM_C604060WA	CAALFM_C604060WA	XP_710567.1				22
3637893	LAB5	CAALFM_C402290WA	XP_720524.1				21
3647819	MAP2	CaO19.8802	XP_710575.1				18
3634805	CAALFM_C109350WA	CAALFM_C109350WA	XP_723482.1				17
3642516	APL4	CaO19.10363	XP_715826.1				16
3638890	RFC5	CAALFM_C200950CA	XP_719478.1				15
3644330	CaO19.7771	CaO19.7771	XP_714055.1				15
3641953	WRS1	CaO19.12691	XP_716357.1				15
3639567	CAALFM_C106970CA	CAALFM_C106970CA	XP_718801.1				15
3646724	SHM1	CAALFM_C703330CA	XP_711682.1				14
3643608	PAP1	CaO19.10713	XP_714750.1				13
3636603	CDC53	CAALFM_C301700WA	XP_721751.1				13
3643206	VTC3	CAALFM_CR03610CA	XP_715157.1				13
3635144	POL1	CAALFM_C304300CA	XP_723089.1				13
3641063	EFB1	CaO19.11319	XP_717318.1				13
3645588	PCT1	CaO19.11663	XP_712791.1				13
3636105	CaO19.12397	CaO19.12397	XP_722256.1				12
3638221	APL2	CaO19.7861	XP_720060.1				12
3639669	MIS12	CAALFM_CR00080WA	XP_718690.1				12
3639782	CaO19.10002	CaO19.10002	XP_718571.1				12
3638190	SMC3	CaO19.7895	XP_720093.1				12
3640067	BDP1	CaO19.10063	XP_718295.1				12
3648144	UGP1	CAALFM_CR04660CA	XP_710258.1				11
3636235	MPD1	CaO19.11402	XP_721990.1				11
3636634	CAALFM_C301420CA	CAALFM_C301420CA	XP_721780.1				10
3646310	BRE5	CaO19.8687	XP_712074.1				10
3639488	CAALFM_C107090CA	CAALFM_C107090CA	XP_718786.1				10
3635753	CAALFM_C202190CA	CAALFM_C202190CA	XP_722579.1				9
3647322	CAALFM_CR06840WA	CAALFM_CR06840WA	XP_711078.1				9
3641389	IFM1	CAALFM_C702940CA	XP_716989.1				9
3644341	RIO1	CaO19.9856	XP_713983.1				9
3643794	CAALFM_C209650WA	CAALFM_C209650WA	XP_714561.1				8
3640273	CAALFM_C603430CA	CAALFM_C603430CA	XP_718045.1				8
3640923	NAT5	CaO19.8120	XP_717442.1				8
3638437	GCD2	CAALFM_C307250WA	XP_719872.1				8
3638543	CAALFM_C306830CA	CAALFM_C306830CA	XP_719912.1				8
3637840	CAALFM_C403170WA	CAALFM_C403170WA	XP_720426.1				7
3642265	MMS21	CAALFM_C306200CA	XP_716078.1				7
3642419	CaO19.8079	CaO19.8079	XP_715933.1				7
3640054	CaO19.10135	CaO19.10135	XP_718364.1				7
3634796	BUD31	CAALFM_C109880CA	XP_723540.1				7
3640399	TMA19	CAALFM_CR00860CA	XP_717958.1				7
3644523	CaO19.8278	CaO19.8278	XP_713835.1				7
3643311	MDG1	CAALFM_C114290CA	XP_715039.1				6
3639739	FAL1	CaO19.10024	XP_718592.1				6
3646750	RRB1	CaO19.13712	XP_711642.1				6
3647869	VIP1	CaO19.5679	XP_710508.1				6
3634779	CAALFM_C110120CA	CAALFM_C110120CA	XP_723565.1				6
3642846	USP1	CaO19.10648	XP_715515.1				6
3637907	CAALFM_C402880CA	CAALFM_C402880CA	XP_720459.1				5
3634808	CEF1	CAALFM_C109370WA	XP_723485.1				5
3635255	SEN1	CAALFM_C304760CA	XP_723150.1				5
3638214	CLF1	CaO19.7964	XP_720159.1				5
3640418	ARC19	CAALFM_CR01040CA	XP_717942.1				5
3639807	CaO19.10009	CaO19.10009	XP_718577.1				5
3643222	CAALFM_CR03690WA	CAALFM_CR03690WA	XP_715144.1				5
3641367	PDI1	CAALFM_C703250CA	XP_716953.1				5
3640404	BOI2	CAALFM_CR01240CA	XP_717921.1				5
3640010	CaO19.10076	CaO19.10076	XP_718308.1				5
3642142	CAALFM_CR08560CA	CAALFM_CR08560CA	XP_716262.1				5
3643763	PAP1	CAALFM_C501780WA	XP_714613.1				5
3644958	CaO19.13111	CaO19.13111	XP_713394.1				4
3643221	SMC1	CAALFM_CR03680CA	XP_715143.1				4
3636255	FOL2	CaO19.11439	XP_722026.1				4
DECOY4248	DECOY4248		DECOY4248				4
3643841	CaO19.11086	CaO19.11086	XP_714496.1				4
3635475	SAP114	CaO19.12129	XP_722876.1				4
3646646	APL3	CaO19.10302	XP_711750.1				4
3636901	CAALFM_C103280WA	CAALFM_C103280WA	XP_721520.1				4
3645926	SRO77	CaO19.8794	XP_712464.1				4
3638721	TFG2	CaO19.9659	XP_719682.1				4
3647116	CDC14	CaO19.11669	XP_711268.1				4
3646770	SPA2	CaO19.13719	XP_711649.1				4
3646752	MAD1	CaO19.13714	XP_711644.1				4
3641734	CAM1	CAALFM_C306010WA	XP_716623.1				4
3646639	POL12	CaO19.10314	XP_711762.1				4
3638951	CTM1	CAALFM_CR10360CA	XP_719373.1				4
3637863	CAALFM_C402520CA	CAALFM_C402520CA	XP_720499.1				3
3641040	RTS2	CaO19.11298	XP_717298.1				3
3640055	PRK1	CaO19.10136	XP_718365.1				3
3648401	CAALFM_C301150CA	CAALFM_C301150CA	XP_710000.1				3
3638525	CAALFM_C307550CA	CAALFM_C307550CA	XP_719834.1				3
3635525	RGA2	CaO19.12062	XP_722810.1				3
3643145	CAALFM_C703850WA	CAALFM_C703850WA	XP_715245.1				3
3643342	CAALFM_C114040WA	CAALFM_C114040WA	XP_715013.1				3
3647245	CaO19.6291	CaO19.6291	XP_711148.1				3
3637244	CaO19.8503	CaO19.8503	XP_721128.1				3
3645594	QRI2	CaO19.11637	XP_712765.1				3
3647559	SLM2	CAALFM_C602060WA	XP_710843.1				3
3645857	RSM23	CaO19.10984	XP_712549.1				3
3645702	POL2	CaO19.9901	XP_712675.1				3
3639788	RGD1	CaO19.9979	XP_718549.1				3
3638294	CaO19.7987	CaO19.7987	XP_720182.1				3
3641224	ECM1	CAALFM_C404100CA	XP_717103.1				3
3636364	CaO19.11447	CaO19.11447	XP_722034.1				3
3635739	SLA1	CAALFM_C201640WA	XP_722523.1				3
3634928	CAALFM_C108630WA	CAALFM_C108630WA	XP_723408.1				2
3645905	GCN3	CAALFM_C701220WA	XP_712476.1				2
3646197	CaO19.13946	CaO19.13946	XP_712165.1				2
3639515	RPS23A	CAALFM_C106580WA	XP_718841.1				2
DECOY11906	DECOY11906		DECOY11906				2
3639663	YRB1	CAALFM_CR00580WA	XP_718634.1				2
3638035	SPL1	CAALFM_C700390WA	XP_720372.1				2
3634850	TFA1	CAALFM_C109860CA	XP_723537.1				2
3646227	DED81	CAALFM_C703670WA	XP_712154.1				2
3637622	CaO19.11703	CaO19.11703	XP_720665.1				2
3634936	CAALFM_C108700WA	CAALFM_C108700WA	XP_723416.1				2
3640593	CAALFM_C300130CA	CAALFM_C300130CA	XP_717830.1				2
3636313	SLH1	CaO19.11463	XP_722050.1				2
3640515	CAALFM_C300500CA	CAALFM_C300500CA	XP_717785.1				2
3646226	CAALFM_C703660CA	CAALFM_C703660CA	XP_712153.1				2
3646889	CaO19.12943	CaO19.12943	XP_711504.1				2
3644823	SIS1	CaO19.11342	XP_713528.1				2
3638952	HCR1	CAALFM_CR10370WA	XP_719374.1				2
3637664	CaO19.11720	CaO19.11720	XP_720681.1				2
3639284	CAALFM_C100910WA	CAALFM_C100910WA	XP_718975.1				2
3642859	MAP1	CaO19.10636	XP_715503.1				2
3638741	ECM16	CaO19.9637	XP_719660.1				2
3635241	CAALFM_C305060WA	CAALFM_C305060WA	XP_723187.1				2

## Sheet: SAINTID 5210
Bait	Prey	PreyGene	Spec	SpecSum	AvgSpec	NumReplicates	ctrlCounts	AvgP	MaxP	TopoAvgP	TopoMaxP	SaintScore	logOddsScore	FoldChange	BFDR	boosted_by	UniqueSpec	UniqueSpecSum	UniqueAvgSpec	PreySequenceLength	UniProtID
CAALFM_C101070CA (KRP1)	XP_723426.1	MSS116	9|32	41	20.5	2	0|0	1	1	1	1	1	15.73	205	0		9|32	41	20.5	668	MS116_CANAL
CAALFM_C101070CA (KRP1)	XP_723512.1	IDH1	4|6	10	5	2	0|0	1	1	1	1	1	7.67	50	0		4|6	10	5	193
CAALFM_C101070CA (KRP1)	XP_723516.1	CAALFM_C109670CA	14|13	27	13.5	2	0|0	1	1	1	1	1	21.85	135	0		14|13	27	13.5	110
CAALFM_C101070CA (KRP1)	XP_723523.1	DAM1	15|24	39	19.5	2	0|0	1	1	1	1	1	24.85	195	0		15|24	39	19.5	277	DAM1_CANAL
CAALFM_C101070CA (KRP1)	XP_723568.1	MIR1	8|15	23	11.5	2	0|0	1	1	1	1	1	14.17	115	0		8|15	23	11.5	307
CAALFM_C101070CA (KRP1)	XP_723070.1	SBP1	40|53	93	46.5	2	8|5	1	1	1	1	1	26.33	7.15	0		40|53	93	46.5	282
CAALFM_C101070CA (KRP1)	XP_723100.1	CAALFM_C304370CA	43|52	95	47.5	2	5|0	1	1	1	1	1	8.93	19	0		43|52	95	47.5	1120
CAALFM_C101070CA (KRP1)	XP_723125.1	MAK21	58|53	111	55.5	2	21|15	1	1	1	1	1	8.98	3.08	0		58|53	111	55.5	1066
CAALFM_C101070CA (KRP1)	XP_723140.1	RPP2B	4|3	7	3.5	2	0|0	1	1	1	1	1	5.92	35	0		4|3	7	3.5	111
CAALFM_C101070CA (KRP1)	XP_723146.1	CAALFM_C304740CA	19|30	49	24.5	2	0|0	1	1	1	1	1	30.8	245	0		19|30	49	24.5	629
CAALFM_C101070CA (KRP1)	XP_723193.1	RPL18	20|21	41	20.5	2	7|6	0.99	1	0.99	1	0.99	4.36	3.15	0		20|21	41	20.5	154
CAALFM_C101070CA (KRP1)	XP_722781.1	CaO19.12032	31|35	66	33	2	8|7	1	1	1	1	1	14.09	4.4	0		31|35	66	33	371
CAALFM_C101070CA (KRP1)	XP_722836.1	FBA1	6|4	10	5	2	0|0	1	1	1	1	1	7.67	50	0		6|4	10	5	359
CAALFM_C101070CA (KRP1)	XP_722890.1	CaO19.12145	48|55	103	51.5	2	0|0	1	1	1	1	1	72.82	515	0		48|55	103	51.5	594
CAALFM_C101070CA (KRP1)	XP_722491.1	CAALFM_C201370CA	6|7	13	6.5	2	0|0	1	1	1	1	1	10.98	65	0		6|7	13	6.5	618
CAALFM_C101070CA (KRP1)	XP_722503.1	SPT5	11|16	27	13.5	2	0|2	1	1	1	1	1	6.15	13.5	0		11|16	27	13.5	956	SPT5_CANAL
CAALFM_C101070CA (KRP1)	XP_722531.1	HSK3	4|4	8	4	2	0|0	1	1	1	1	1	7.67	40	0		4|4	8	4	106
CAALFM_C101070CA (KRP1)	XP_722533.1	CAALFM_C201730WA	52|53	105	52.5	2	0|0	1	1	1	1	1	78.55	525	0		52|53	105	52.5	252	SPC24_CANAL
CAALFM_C101070CA (KRP1)	XP_722541.1	RAD7	3|3	6	3	2	0|0	1	1	1	1	1	5.92	30	0		3|3	6	3	652
CAALFM_C101070CA (KRP1)	XP_722572.1	CAALFM_C202120WA	37|40	77	38.5	2	0|10	0.99	0.99	0.99	0.99	0.99	4.52	7.7	0		37|40	77	38.5	351
CAALFM_C101070CA (KRP1)	XP_722602.1	POB3	41|43	84	42	2	0|9	1	1	1	1	1	5.32	9.33	0		41|43	84	42	538	POB3_CANAL
CAALFM_C101070CA (KRP1)	XP_722281.1	CaO19.12424	22|28	50	25	2	0|0	1	1	1	1	1	35.22	250	0		22|28	50	25	573
CAALFM_C101070CA (KRP1)	XP_722333.1	MYO2	7|11	18	9	2	0|0	1	1	1	1	1	12.59	90	0		7|11	18	9	1561
CAALFM_C101070CA (KRP1)	XP_722018.1	YTA7	52|64	116	58	2	0|0	1	1	1	1	1	78.55	580	0		52|64	116	58	1314
CAALFM_C101070CA (KRP1)	XP_722048.1	CaO19.11461	10|13	23	11.5	2	4|2	0.98	1	0.98	1	0.98	3	3.83	0		10|13	23	11.5	237
CAALFM_C101070CA (KRP1)	XP_722090.1	CaO19.11504	27|36	63	31.5	2	0|0	1	1	1	1	1	42.53	315	0		27|36	63	31.5	303
CAALFM_C101070CA (KRP1)	XP_721692.1	ILV2	6|11	17	8.5	2	0|0	1	1	1	1	1	10.98	85	0		6|11	17	8.5	683
CAALFM_C101070CA (KRP1)	XP_721697.1	GFA1	17|19	36	18	2	4|0	0.99	0.99	0.99	0.99	0.99	4.7	9	0		17|19	36	18	713	GFA1_CANAL
CAALFM_C101070CA (KRP1)	XP_721738.1	DBP5	7|6	13	6.5	2	0|0	1	1	1	1	1	10.98	65	0		7|6	13	6.5	540	DBP5_CANAL
CAALFM_C101070CA (KRP1)	XP_721745.1	CAALFM_C301770CA	11|11	22	11	2	0|0	1	1	1	1	1	18.81	110	0		11|11	22	11	623
CAALFM_C101070CA (KRP1)	XP_721804.1	UTP20	3|3	6	3	2	0|0	1	1	1	1	1	5.92	30	0		3|3	6	3	508
CAALFM_C101070CA (KRP1)	XP_721429.1	GSC1	2|3	5	2.5	2	0|0	0.99	1	0.99	1	0.99	4.08	25	0		2|3	5	2.5	1897
CAALFM_C101070CA (KRP1)	XP_721455.1	MGM101	5|7	12	6	2	0|2	0.94	0.97	0.94	0.97	0.94	2.26	6	0		5|7	12	6	275	MG101_CANAL
CAALFM_C101070CA (KRP1)	XP_721460.1	CAALFM_C102720WA	5|4	9	4.5	2	0|0	1	1	1	1	1	7.67	45	0		5|4	9	4.5	397
CAALFM_C101070CA (KRP1)	XP_721463.1	CAALFM_C102750CA	13|21	34	17	2	0|0	1	1	1	1	1	21.85	170	0		13|21	34	17	795
CAALFM_C101070CA (KRP1)	XP_721490.1	RPP1A	4|4	8	4	2	0|0	1	1	1	1	1	7.67	40	0		4|4	8	4	106	RLA1_CANAL
CAALFM_C101070CA (KRP1)	XP_721492.1	RPL13	32|27	59	29.5	2	12|6	0.92	1	0.92	1	0.92	1.62	3.28	0		32|27	59	29.5	202	RL13_CANAL
CAALFM_C101070CA (KRP1)	XP_721512.1	BMH1	11|14	25	12.5	2	0|6	0.9	0.94	0.9	0.94	0.9	1.79	4.17	0		11|14	25	12.5	264	1433_CANAL
CAALFM_C101070CA (KRP1)	XP_721525.1	CAALFM_C103310WA	5|9	14	7	2	0|0	1	1	1	1	1	9.35	70	0		5|9	14	7	428
CAALFM_C101070CA (KRP1)	XP_721535.1	CAALFM_C103370WA	55|61	116	58	2	15|3	1	1	1	1	1	5.41	6.44	0		55|61	116	58	629	PABP_CANAL
CAALFM_C101070CA (KRP1)	XP_721561.1	HFL1	6|9	15	7.5	2	0|0	1	1	1	1	1	10.98	75	0		6|9	15	7.5	237
CAALFM_C101070CA (KRP1)	XP_721353.1	HSP90	17|24	41	20.5	2	4|6	1	1	1	1	1	5.3	4.1	0		17|24	41	20.5	707	HSP90_CANAL
CAALFM_C101070CA (KRP1)	XP_721375.1	CAALFM_C701830WA	97|86	183	91.5	2	0|0	1	1	1	1	1	126.98	915	0		97|86	183	91.5	230
CAALFM_C101070CA (KRP1)	XP_721377.1	RVB2	32|37	69	34.5	2	0|0	1	1	1	1	1	49.79	345	0		32|37	69	34.5	498	RUVB2_CANAL
CAALFM_C101070CA (KRP1)	XP_721378.1	PFK2	5|9	14	7	2	0|0	1	1	1	1	1	9.35	70	0		5|9	14	7	946
CAALFM_C101070CA (KRP1)	XP_721379.1	RPL5	9|5	14	7	2	0|0	1	1	1	1	1	9.35	70	0		9|5	14	7	298
CAALFM_C101070CA (KRP1)	XP_721055.1	NOP12	22|21	43	21.5	2	2|3	1	1	1	1	1	17.14	8.6	0		22|21	43	21.5	454
CAALFM_C101070CA (KRP1)	XP_721059.1	CaO19.8433	8|10	18	9	2	0|0	1	1	1	1	1	14.17	90	0		8|10	18	9	692
CAALFM_C101070CA (KRP1)	XP_721081.1	CaO19.8455	8|12	20	10	2	0|0	1	1	1	1	1	14.17	100	0		8|12	20	10	786
CAALFM_C101070CA (KRP1)	XP_721082.1	CaO19.8456	3|7	10	5	2	0|0	1	1	1	1	1	5.92	50	0		3|7	10	5	370
CAALFM_C101070CA (KRP1)	XP_720437.1	CAALFM_C403080WA	24|52	76	38	2	0|0	1	1	1	1	1	38.15	380	0		24|52	76	38	811
CAALFM_C101070CA (KRP1)	XP_720466.1	RPC53	7|8	15	7.5	2	0|0	1	1	1	1	1	12.59	75	0		7|8	15	7.5	452
CAALFM_C101070CA (KRP1)	XP_720305.1	CAALFM_C701030CA	43|42	85	42.5	2	14|14	1	1	1	1	1	7.95	3.04	0		43|42	85	42.5	1217
CAALFM_C101070CA (KRP1)	XP_720309.1	RPP0	43|45	88	44	2	17|14	0.99	1	0.99	1	0.99	4.53	2.84	0		43|45	88	44	312
CAALFM_C101070CA (KRP1)	XP_720154.1	HTZ1	25|24	49	24.5	2	0|0	1	1	1	1	1	38.15	245	0		25|24	49	24.5	133
CAALFM_C101070CA (KRP1)	XP_719905.1	TPD3	6|5	11	5.5	2	0|0	1	1	1	1	1	9.35	55	0		6|5	11	5.5	643
CAALFM_C101070CA (KRP1)	XP_719920.1	CAALFM_C306760WA	4|6	10	5	2	0|0	1	1	1	1	1	7.67	50	0		4|6	10	5	275
CAALFM_C101070CA (KRP1)	XP_719580.1	NIC96	3|3	6	3	2	0|0	1	1	1	1	1	5.92	30	0		3|3	6	3	960
CAALFM_C101070CA (KRP1)	XP_719615.1	RSC4	4|7	11	5.5	2	0|0	1	1	1	1	1	7.67	55	0		4|7	11	5.5	636
CAALFM_C101070CA (KRP1)	XP_719628.1	NPL6	8|7	15	7.5	2	0|0	1	1	1	1	1	12.59	75	0		8|7	15	7.5	449
CAALFM_C101070CA (KRP1)	XP_719641.1	CaO19.9617	11|26	37	18.5	2	0|0	1	1	1	1	1	18.81	185	0		11|26	37	18.5	520
CAALFM_C101070CA (KRP1)	XP_719658.1	DPB4	8|11	19	9.5	2	0|0	1	1	1	1	1	14.17	95	0		8|11	19	9.5	261
CAALFM_C101070CA (KRP1)	XP_719663.1	RFA1	132|141	273	136.5	2	0|0	1	1	1	1	1	192.14	1365	0		132|141	273	136.5	624
CAALFM_C101070CA (KRP1)	XP_719315.1	CAALFM_CR09810WA	3|5	8	4	2	0|0	1	1	1	1	1	5.92	40	0		3|5	8	4	237
CAALFM_C101070CA (KRP1)	XP_719356.1	CAALFM_CR10180WA	3|4	7	3.5	2	0|0	1	1	1	1	1	5.92	35	0		3|4	7	3.5	213
CAALFM_C101070CA (KRP1)	XP_719192.1	CaO19.12956	43|41	84	42	2	0|0	1	1	1	1	1	62.77	420	0		43|41	84	42	1064
CAALFM_C101070CA (KRP1)	XP_719231.1	MIF2	45|50	95	47.5	2	0|0	1	1	1	1	1	68.52	475	0		45|50	95	47.5	520
CAALFM_C101070CA (KRP1)	XP_719238.1	RBF1	8|11	19	9.5	2	0|0	1	1	1	1	1	14.17	95	0		8|11	19	9.5	530
CAALFM_C101070CA (KRP1)	XP_719243.1	RNH12	6|7	13	6.5	2	0|0	1	1	1	1	1	10.98	65	0		6|7	13	6.5	232
CAALFM_C101070CA (KRP1)	XP_719283.1	RPC34	7|6	13	6.5	2	0|0	1	1	1	1	1	10.98	65	0		7|6	13	6.5	330
CAALFM_C101070CA (KRP1)	XP_719303.1	CaO19.13072	2|4	6	3	2	0|0	0.99	1	0.99	1	0.99	4.08	30	0		2|4	6	3	369
CAALFM_C101070CA (KRP1)	XP_718973.1	SIN3	5|5	10	5	2	0|0	1	1	1	1	1	9.35	50	0		5|5	10	5	1119
CAALFM_C101070CA (KRP1)	XP_718976.1	RRS1	2|4	6	3	2	0|0	0.99	1	0.99	1	0.99	4.08	30	0		2|4	6	3	205
CAALFM_C101070CA (KRP1)	XP_719003.1	RPO41	68|75	143	71.5	2	0|0	1	1	1	1	1	101.39	715	0		68|75	143	71.5	1300
CAALFM_C101070CA (KRP1)	XP_719068.1	TUP1	2|5	7	3.5	2	0|0	0.99	1	0.99	1	0.99	4.08	35	0		2|5	7	3.5	514	TUP1_CANAL
CAALFM_C101070CA (KRP1)	XP_718788.1	DHH1	15|16	31	15.5	2	4|3	1	1	1	1	1	7.26	4.43	0		15|16	31	15.5	549	DHH1_CANAL
CAALFM_C101070CA (KRP1)	XP_718578.1	CaO19.10010	8|18	26	13	2	0|0	1	1	1	1	1	14.17	130	0		8|18	26	13	634
CAALFM_C101070CA (KRP1)	XP_718587.1	RIM1	47|48	95	47.5	2	0|0	1	1	1	1	1	71.39	475	0		47|48	95	47.5	143
CAALFM_C101070CA (KRP1)	XP_718593.1	KAP123	19|18	37	18.5	2	3|0	1	1	1	1	1	6.57	12.33	0		19|18	37	18.5	1109
CAALFM_C101070CA (KRP1)	XP_718605.1	BMS1	21|20	41	20.5	2	2|6	1	1	1	1	1	6.28	5.12	0		21|20	41	20.5	1210
CAALFM_C101070CA (KRP1)	XP_718608.1	ARP9	18|17	35	17.5	2	0|0	1	1	1	1	1	27.84	175	0		18|17	35	17.5	484
CAALFM_C101070CA (KRP1)	XP_718387.1	CaO19.10805	157|179	336	168	2	0|0	1	1	1	1	1	227.46	1680	0		157|179	336	168	474
CAALFM_C101070CA (KRP1)	XP_718449.1	ARP8	18|14	32	16	2	0|0	1	1	1	1	1	23.35	160	0		18|14	32	16	1014
CAALFM_C101070CA (KRP1)	XP_718287.1	NNF1	51|58	109	54.5	2	0|0	1	1	1	1	1	77.12	545	0		51|58	109	54.5	196
CAALFM_C101070CA (KRP1)	XP_718292.1	LYS12	3|4	7	3.5	2	0|0	1	1	1	1	1	5.92	35	0		3|4	7	3.5	376
CAALFM_C101070CA (KRP1)	XP_717975.1	CAALFM_CR00700WA	26|34	60	30	2	0|0	1	1	1	1	1	41.07	300	0		26|34	60	30	461
CAALFM_C101070CA (KRP1)	XP_717759.1	PMA1	4|6	10	5	2	0|0	1	1	1	1	1	7.67	50	0		4|6	10	5	895
CAALFM_C101070CA (KRP1)	XP_717589.1	CAALFM_C107810CA	4|8	12	6	2	0|0	1	1	1	1	1	7.67	60	0		4|8	12	6	756
CAALFM_C101070CA (KRP1)	XP_717622.1	CAALFM_C108110WA	7|8	15	7.5	2	0|0	1	1	1	1	1	12.59	75	0		7|8	15	7.5	1091
CAALFM_C101070CA (KRP1)	XP_717630.1	CAALFM_C108160WA	5|8	13	6.5	2	0|0	1	1	1	1	1	9.35	65	0		5|8	13	6.5	352
CAALFM_C101070CA (KRP1)	XP_717437.1	CDC31	3|7	10	5	2	0|0	1	1	1	1	1	5.92	50	0		3|7	10	5	221
CAALFM_C101070CA (KRP1)	XP_717268.1	CaO19.11268	35|51	86	43	2	0|0	1	1	1	1	1	54.13	430	0		35|51	86	43	247
CAALFM_C101070CA (KRP1)	XP_717272.1	CaO19.11272	2|3	5	2.5	2	0|0	0.99	1	0.99	1	0.99	4.08	25	0		2|3	5	2.5	457
CAALFM_C101070CA (KRP1)	XP_717123.1	NCE4	13|14	27	13.5	2	0|0	1	1	1	1	1	21.85	135	0		13|14	27	13.5	168
CAALFM_C101070CA (KRP1)	XP_717136.1	GCN1	3|4	7	3.5	2	0|0	1	1	1	1	1	5.92	35	0		3|4	7	3.5	1600
CAALFM_C101070CA (KRP1)	XP_717138.1	SGS1	35|31	66	33	2	0|0	1	1	1	1	1	48.34	330	0		35|31	66	33	1189
CAALFM_C101070CA (KRP1)	XP_717153.1	CAALFM_C210700CA	10|15	25	12.5	2	0|0	1	1	1	1	1	17.28	125	0		10|15	25	12.5	290
CAALFM_C101070CA (KRP1)	XP_716949.1	CaO19.5126	3|3	6	3	2	0|0	1	1	1	1	1	5.92	30	0		3|3	6	3	184
CAALFM_C101070CA (KRP1)	XP_716829.1	PET9	33|34	67	33.5	2	13|7	0.99	1	0.99	1	0.99	4.9	3.35	0		33|34	67	33.5	301
CAALFM_C101070CA (KRP1)	XP_716838.1	NAM7	17|18	35	17.5	2	0|0	1	1	1	1	1	27.84	175	0		17|18	35	17.5	1019
CAALFM_C101070CA (KRP1)	XP_716874.1	CaO19.8591	61|56	117	58.5	2	28|0	0.92	0.95	0.92	0.95	0.92	2.1	4.18	0		61|56	117	58.5	681
CAALFM_C101070CA (KRP1)	XP_716737.1	CAALFM_C601560WA	2|3	5	2.5	2	0|0	0.99	1	0.99	1	0.99	4.08	25	0		2|3	5	2.5	344
CAALFM_C101070CA (KRP1)	XP_716758.1	TRA1	3|3	6	3	2	0|0	1	1	1	1	1	5.92	30	0		3|3	6	3	2284
CAALFM_C101070CA (KRP1)	XP_716625.1	NOG1	13|23	36	18	2	0|0	1	1	1	1	1	21.85	180	0		13|23	36	18	640
CAALFM_C101070CA (KRP1)	XP_716534.1	CaO19.1226	15|11	26	13	2	0|0	1	1	1	1	1	18.81	130	0		15|11	26	13	531
CAALFM_C101070CA (KRP1)	XP_716363.1	BRX1	5|5	10	5	2	0|0	1	1	1	1	1	9.35	50	0		5|5	10	5	292
CAALFM_C101070CA (KRP1)	XP_716365.1	CaO19.12699	3|2	5	2.5	2	0|0	0.99	1	0.99	1	0.99	4.08	25	0		3|2	5	2.5	232
CAALFM_C101070CA (KRP1)	XP_716213.1	DCP2	30|38	68	34	2	0|0	1	1	1	1	1	46.89	340	0		30|38	68	34	907
CAALFM_C101070CA (KRP1)	XP_716066.1	ISW2	6|10	16	8	2	0|0	1	1	1	1	1	10.98	80	0		6|10	16	8	1056	ISW2_CANAL
CAALFM_C101070CA (KRP1)	XP_716087.1	CAALFM_C306370CA	3|6	9	4.5	2	0|0	1	1	1	1	1	5.92	45	0		3|6	9	4.5	390
CAALFM_C101070CA (KRP1)	XP_716120.1	CAALFM_C306700CA	8|13	21	10.5	2	0|3	0.97	0.99	0.97	0.99	0.97	2.75	7	0		8|13	21	10.5	613	RMD9_CANAL
CAALFM_C101070CA (KRP1)	XP_715928.1	RPC25	3|5	8	4	2	0|0	1	1	1	1	1	5.92	40	0		3|5	8	4	195
CAALFM_C101070CA (KRP1)	XP_715808.1	CaO19.10345	194|205	399	199.5	2	0|0	1	1	1	1	1	279.67	1995	0		194|205	399	199.5	788
CAALFM_C101070CA (KRP1)	XP_715812.1	RPC31	5|4	9	4.5	2	0|0	1	1	1	1	1	7.67	45	0		5|4	9	4.5	289
CAALFM_C101070CA (KRP1)	XP_715829.1	RPC82	13|14	27	13.5	2	0|0	1	1	1	1	1	21.85	135	0		13|14	27	13.5	595
CAALFM_C101070CA (KRP1)	XP_715704.1	NUF2	124|132	256	128	2	0|0	1	1	1	1	1	180.83	1280	0		124|132	256	128	544	NUF2_CANAL
CAALFM_C101070CA (KRP1)	XP_715586.1	TOP2	35|43	78	39	2	0|0	1	1	1	1	1	54.13	390	0		35|43	78	39	1461
CAALFM_C101070CA (KRP1)	XP_715588.1	CBF1	15|15	30	15	2	0|4	0.98	0.98	0.98	0.98	0.98	4.15	7.5	0		15|15	30	15	223
CAALFM_C101070CA (KRP1)	XP_715589.1	CaO19.10395	13|13	26	13	2	4|2	1	1	1	1	1	6.41	4.33	0		13|13	26	13	567
CAALFM_C101070CA (KRP1)	XP_715596.1	SPT16	72|69	141	70.5	2	8|15	1	1	1	1	1	20.2	6.13	0		72|69	141	70.5	1060
CAALFM_C101070CA (KRP1)	XP_715612.1	CaO19.10419	3|3	6	3	2	0|0	1	1	1	1	1	5.92	30	0		3|3	6	3	611
CAALFM_C101070CA (KRP1)	XP_715472.1	MSH2	8|7	15	7.5	2	0|0	1	1	1	1	1	12.59	75	0		8|7	15	7.5	873
CAALFM_C101070CA (KRP1)	XP_715482.1	RPO3	38|39	77	38.5	2	0|0	1	1	1	1	1	58.45	385	0		38|39	77	38.5	1448
CAALFM_C101070CA (KRP1)	XP_715508.1	RVB1	31|32	63	31.5	2	0|0	1	1	1	1	1	48.34	315	0		31|32	63	31.5	458
CAALFM_C101070CA (KRP1)	XP_715332.1	IDH2	4|3	7	3.5	2	0|0	1	1	1	1	1	5.92	35	0		4|3	7	3.5	369
CAALFM_C101070CA (KRP1)	XP_715236.1	MAM33	4|6	10	5	2	0|0	1	1	1	1	1	7.67	50	0		4|6	10	5	264
CAALFM_C101070CA (KRP1)	XP_715016.1	CAALFM_C114080WA	94|89	183	91.5	2	33|22	1	1	1	1	1	6.99	3.33	0		94|89	183	91.5	1818	UTP10_CANAL
CAALFM_C101070CA (KRP1)	XP_715034.1	CAALFM_C114240WA	25|32	57	28.5	2	0|0	1	1	1	1	1	39.61	285	0		25|32	57	28.5	561
CAALFM_C101070CA (KRP1)	XP_714963.1	SUP45	10|12	22	11	2	0|5	0.92	0.94	0.91	0.94	0.92	2.11	4.4	0		10|12	22	11	436
CAALFM_C101070CA (KRP1)	XP_714910.1	DAD2	25|27	52	26	2	0|0	1	1	1	1	1	39.61	260	0		25|27	52	26	125	DAD2_CANAL
CAALFM_C101070CA (KRP1)	XP_714855.1	CAALFM_C207100WA	14|15	29	14.5	2	0|0	1	1	1	1	1	23.35	145	0		14|15	29	14.5	469
CAALFM_C101070CA (KRP1)	XP_714857.1	RFA2	69|68	137	68.5	2	0|0	1	1	1	1	1	101.39	685	0		69|68	137	68.5	272
CAALFM_C101070CA (KRP1)	XP_714864.1	CAALFM_C207190CA	6|6	12	6	2	0|0	1	1	1	1	1	10.98	60	0		6|6	12	6	174
CAALFM_C101070CA (KRP1)	XP_714691.1	TEA1	4|3	7	3.5	2	0|0	1	1	1	1	1	5.92	35	0		4|3	7	3.5	900
CAALFM_C101070CA (KRP1)	XP_714637.1	MTW1	80|77	157	78.5	2	0|0	1	1	1	1	1	114.2	785	0		80|77	157	78.5	314
CAALFM_C101070CA (KRP1)	XP_714488.1	RPT6	4|5	9	4.5	2	0|0	1	1	1	1	1	7.67	45	0		4|5	9	4.5	401
CAALFM_C101070CA (KRP1)	XP_714502.1	CaO19.11092	30|24	54	27	2	8|10	0.91	1	0.91	1	0.91	1.48	3	0		30|24	54	27	423
CAALFM_C101070CA (KRP1)	XP_714305.1	TOP1	49|51	100	50	2	3|5	1	1	1	1	1	46.43	12.5	0		49|51	100	50	780
CAALFM_C101070CA (KRP1)	XP_713838.1	NEP1	5|6	11	5.5	2	0|0	1	1	1	1	1	9.35	55	0		5|6	11	5.5	267
CAALFM_C101070CA (KRP1)	XP_713843.1	SMT3	2|4	6	3	2	0|0	0.99	1	0.99	1	0.99	4.08	30	0		2|4	6	3	102
CAALFM_C101070CA (KRP1)	XP_713775.1	CAALFM_C102240WA	12|10	22	11	2	0|0	1	1	1	1	1	17.28	110	0		12|10	22	11	875
CAALFM_C101070CA (KRP1)	XP_713691.1	CaO19.8643	6|8	14	7	2	0|0	1	1	1	1	1	10.98	70	0		6|8	14	7	495
CAALFM_C101070CA (KRP1)	XP_713692.1	POR1	6|22	28	14	2	0|0	1	1	1	1	1	10.98	140	0		6|22	28	14	282
CAALFM_C101070CA (KRP1)	XP_713696.1	CaO19.8649	28|38	66	33	2	11|5	0.99	1	0.99	1	0.99	3.94	4.12	0		28|38	66	33	849
CAALFM_C101070CA (KRP1)	XP_713701.1	HTB2	83|91	174	87	2	20|16	1	1	1	1	1	42.76	4.83	0		83|91	174	87	130
CAALFM_C101070CA (KRP1)	XP_713708.1	HHF1	67|58	125	62.5	2	11|7	1	1	1	1	1	39.22	6.94	0		67|58	125	62.5	105
CAALFM_C101070CA (KRP1)	XP_713604.1	SEC21	9|12	21	10.5	2	0|0	1	1	1	1	1	15.73	105	0		9|12	21	10.5	936
CAALFM_C101070CA (KRP1)	XP_713620.1	CaO19.8395	10|14	24	12	2	0|0	1	1	1	1	1	17.28	120	0		10|14	24	12	195
CAALFM_C101070CA (KRP1)	XP_713537.1	CaO19.11352	10|11	21	10.5	2	0|0	1	1	1	1	1	17.28	105	0		10|11	21	10.5	138
CAALFM_C101070CA (KRP1)	XP_713375.1	SUB2	7|9	16	8	2	3|0	0.94	0.96	0.94	0.96	0.94	2.33	5.33	0		7|9	16	8	290
CAALFM_C101070CA (KRP1)	XP_713381.1	ATP2	16|24	40	20	2	0|0	1	1	1	1	1	26.35	200	0		16|24	40	20	512
CAALFM_C101070CA (KRP1)	XP_713385.1	CaO19.13102	2|2	4	2	2	0|0	0.98	0.98	0.98	0.98	0.98	4.08	20	0		2|2	4	2	987
CAALFM_C101070CA (KRP1)	XP_713189.1	RCL1	7|5	12	6	2	0|2	0.94	0.97	0.94	0.97	0.94	2.26	6	0		7|5	12	6	371
CAALFM_C101070CA (KRP1)	XP_713200.1	CaO19.9453	13|15	28	14	2	0|0	1	1	1	1	1	21.85	140	0		13|15	28	14	344
CAALFM_C101070CA (KRP1)	XP_713204.1	MCM3	2|4	6	3	2	0|0	0.99	1	0.99	1	0.99	4.08	30	0		2|4	6	3	878
CAALFM_C101070CA (KRP1)	XP_713205.1	CaO19.9458	20|24	44	22	2	5|5	1	1	1	1	1	8.72	4.4	0		20|24	44	22	562
CAALFM_C101070CA (KRP1)	XP_713046.1	CaO19.8736	6|7	13	6.5	2	0|0	1	1	1	1	1	10.98	65	0		6|7	13	6.5	394
CAALFM_C101070CA (KRP1)	XP_712969.1	CAALFM_C101800WA	4|4	8	4	2	0|0	1	1	1	1	1	7.67	40	0		4|4	8	4	239
CAALFM_C101070CA (KRP1)	XP_712670.1	URA2	4|9	13	6.5	2	0|0	1	1	1	1	1	7.67	65	0		4|9	13	6.5	2216
CAALFM_C101070CA (KRP1)	XP_712532.1	SAR1	2|7	9	4.5	2	0|0	0.99	1	0.99	1	0.99	4.08	45	0		2|7	9	4.5	152
CAALFM_C101070CA (KRP1)	XP_712536.1	CaO19.10970	10|16	26	13	2	0|0	1	1	1	1	1	17.28	130	0		10|16	26	13	379
CAALFM_C101070CA (KRP1)	XP_712537.1	SEC27	5|8	13	6.5	2	0|0	1	1	1	1	1	9.35	65	0		5|8	13	6.5	939
CAALFM_C101070CA (KRP1)	XP_712547.1	NIP7	4|6	10	5	2	0|0	1	1	1	1	1	7.67	50	0		4|6	10	5	262
CAALFM_C101070CA (KRP1)	XP_712475.1	CAALFM_C701210CA	4|5	9	4.5	2	0|0	1	1	1	1	1	7.67	45	0		4|5	9	4.5	278
CAALFM_C101070CA (KRP1)	XP_712478.1	ASC1	2|2	4	2	2	0|0	0.98	0.98	0.98	0.98	0.98	4.08	20	0		2|2	4	2	211	GBLP_CANAL
CAALFM_C101070CA (KRP1)	XP_712479.1	CAALFM_C701270CA	16|17	33	16.5	2	0|0	1	1	1	1	1	26.35	165	0		16|17	33	16.5	602	CMR1_CANAL
CAALFM_C101070CA (KRP1)	XP_712451.1	CaO19.8780	4|6	10	5	2	0|0	1	1	1	1	1	7.67	50	0		4|6	10	5	684
CAALFM_C101070CA (KRP1)	XP_712460.1	NOP58	145|149	294	147	2	0|0	1	1	1	1	1	210.51	1470	0		145|149	294	147	515
CAALFM_C101070CA (KRP1)	XP_712237.1	ELC1	7|4	11	5.5	2	0|0	1	1	1	1	1	7.67	55	0		7|4	11	5.5	100
CAALFM_C101070CA (KRP1)	XP_712246.1	EDC3	22|25	47	23.5	2	2|0	1	1	1	1	1	12.71	23.5	0		22|25	47	23.5	512
CAALFM_C101070CA (KRP1)	XP_712168.1	CaO19.13949	67|65	132	66	2	0|0	1	1	1	1	1	97.11	660	0		67|65	132	66	239
CAALFM_C101070CA (KRP1)	XP_712174.1	VMA2	12|21	33	16.5	2	5|0	0.96	0.99	0.96	0.99	0.96	2.72	6.6	0		12|21	33	16.5	512
CAALFM_C101070CA (KRP1)	XP_712104.1	NOP8	20|28	48	24	2	4|0	1	1	1	1	1	5.49	12	0		20|28	48	24	690
CAALFM_C101070CA (KRP1)	XP_712047.1	RPO26	4|4	8	4	2	0|0	1	1	1	1	1	7.67	40	0		4|4	8	4	157
CAALFM_C101070CA (KRP1)	XP_711967.1	SPC19	23|26	49	24.5	2	0|0	1	1	1	1	1	36.69	245	0		23|26	49	24.5	175	SPC19_CANAL
CAALFM_C101070CA (KRP1)	XP_711904.1	GCR3	86|75	161	80.5	2	2|0	1	1	1	1	1	41.99	80.5	0		86|75	161	80.5	886
CAALFM_C101070CA (KRP1)	XP_711742.1	CaO19.10294	26|25	51	25.5	2	3|0	1	1	1	1	1	8.99	17	0		26|25	51	25.5	665
CAALFM_C101070CA (KRP1)	XP_711555.1	DUO1	8|7	15	7.5	2	0|0	1	1	1	1	1	12.59	75	0		8|7	15	7.5	171
CAALFM_C101070CA (KRP1)	XP_711515.1	MAK16	3|5	8	4	2	0|0	1	1	1	1	1	5.92	40	0		3|5	8	4	315
CAALFM_C101070CA (KRP1)	XP_711283.1	RAD52	4|4	8	4	2	0|0	1	1	1	1	1	7.67	40	0		4|4	8	4	564
CAALFM_C101070CA (KRP1)	XP_711238.1	SNL1	6|9	15	7.5	2	0|0	1	1	1	1	1	10.98	75	0		6|9	15	7.5	199
CAALFM_C101070CA (KRP1)	XP_711070.1	CAALFM_CR06920WA	66|67	133	66.5	2	0|0	1	1	1	1	1	98.54	665	0		66|67	133	66.5	374
CAALFM_C101070CA (KRP1)	XP_711056.1	CaO19.11188	20|21	41	20.5	2	0|0	1	1	1	1	1	32.28	205	0		20|21	41	20.5	606
CAALFM_C101070CA (KRP1)	XP_711026.1	CaO19.9399	75|72	147	73.5	2	0|0	1	1	1	1	1	107.08	735	0		75|72	147	73.5	374
CAALFM_C101070CA (KRP1)	XP_710834.1	CTF5	3|2	5	2.5	2	0|0	0.99	1	0.99	1	0.99	4.08	25	0		3|2	5	2.5	296
CAALFM_C101070CA (KRP1)	XP_710813.1	CaO19.13269	20|23	43	21.5	2	0|0	1	1	1	1	1	32.28	215	0		20|23	43	21.5	1157
CAALFM_C101070CA (KRP1)	XP_710682.1	RPL3	59|64	123	61.5	2	19|15	1	1	1	1	1	19.05	3.62	0		59|64	123	61.5	389
CAALFM_C101070CA (KRP1)	XP_710644.1	CSE4	25|22	47	23.5	2	0|0	1	1	1	1	1	35.22	235	0		25|22	47	23.5	211	CENPA_CANAL
CAALFM_C101070CA (KRP1)	XP_710572.1	CaO19.8798	16|10	26	13	2	0|0	1	1	1	1	1	17.28	130	0		16|10	26	13	123
CAALFM_C101070CA (KRP1)	XP_710535.1	ENP1	5|6	11	5.5	2	0|0	1	1	1	1	1	9.35	55	0		5|6	11	5.5	475
CAALFM_C101070CA (KRP1)	XP_710511.1	CAALFM_C500150CA	15|16	31	15.5	2	0|2	1	1	1	1	1	8.59	15.5	0		15|16	31	15.5	543
CAALFM_C101070CA (KRP1)	XP_710434.1	CAALFM_CR07080WA	6|9	15	7.5	2	3|0	0.91	0.96	0.91	0.96	0.91	1.86	5	0		6|9	15	7.5	245	IF6_CANAL
CAALFM_C101070CA (KRP1)	XP_710427.1	CAALFM_C604120CA	203|200	403	201.5	2	0|0	1	1	1	1	1	288.13	2015	0		203|200	403	201.5	915
CAALFM_C101070CA (KRP1)	XP_710254.1	CAALFM_CR04720CA	9|10	19	9.5	2	0|0	1	1	1	1	1	15.73	95	0		9|10	19	9.5	1387	INO80_CANAL
CAALFM_C101070CA (KRP1)	XP_709976.1	CaO19.37	13|16	29	14.5	2	0|0	1	1	1	1	1	21.85	145	0		13|16	29	14.5	478
CAALFM_C101070CA (KRP1)	P02533	KRT14	186|8	194	97	2	0|0	1	1	1	1	1	14.17	970	0		186|8	194	97	472	K1C14_HUMAN
CAALFM_C101070CA (KRP1)	XP_721698.1	CAALFM_C302260CA	28|21	49	24.5	2	0|0	1	1	1	1	1	33.75	245	0		28|21	49	24.5	586
CAALFM_C101070CA (KRP1)	XP_721313.1	CYP1	8|3	11	5.5	2	0|0	1	1	1	1	1	5.92	55	0		8|3	11	5.5	162	PPIA_CANAL
CAALFM_C101070CA (KRP1)	XP_720417.1	CAALFM_C403290WA	6|7	13	6.5	2	0|0	1	1	1	1	1	10.98	65	0		6|7	13	6.5	899
CAALFM_C101070CA (KRP1)	XP_720068.1	STH1	26|37	63	31.5	2	0|0	1	1	1	1	1	41.07	315	0		26|37	63	31.5	1303
CAALFM_C101070CA (KRP1)	XP_719596.1	HXT63	4|5	9	4.5	2	0|0	1	1	1	1	1	7.67	45	0		4|5	9	4.5	550
CAALFM_C101070CA (KRP1)	XP_719364.1	AHA1	5|9	14	7	2	0|0	1	1	1	1	1	9.35	70	0		5|9	14	7	346
CAALFM_C101070CA (KRP1)	XP_719282.1	CaO19.13050	21|21	42	21	2	0|4	1	1	1	1	1	5.75	10.5	0		21|21	42	21	313
CAALFM_C101070CA (KRP1)	XP_719300.1	ARP4	18|12	30	15	2	0|0	1	1	1	1	1	20.33	150	0		18|12	30	15	468
CAALFM_C101070CA (KRP1)	XP_716425.1	CAALFM_CR08930CA	4|7	11	5.5	2	0|0	1	1	1	1	1	7.67	55	0		4|7	11	5.5	167
CAALFM_C101070CA (KRP1)	XP_714443.1	TIF4631	16|19	35	17.5	2	0|0	1	1	1	1	1	26.35	175	0		16|19	35	17.5	1084
CAALFM_C101070CA (KRP1)	XP_713710.1	HHT1	21|18	39	19.5	2	0|0	1	1	1	1	1	29.32	195	0		21|18	39	19.5	136
CAALFM_C101070CA (KRP1)	XP_712340.1	PIF1	19|30	49	24.5	2	0|0	1	1	1	1	1	30.8	245	0		19|30	49	24.5	906	PIF1_CANAL
CAALFM_C101070CA (KRP1)	XP_711309.1	CAALFM_CR09520CA	122|150	272	136	2	0|0	1	1	1	1	1	178	1360	0		122|150	272	136	924
CAALFM_C101070CA (KRP1)	XP_712600.1	CAALFM_C208910CA	4|6	10	5	2	0|0	1	1	1	1	1	7.67	50	0		4|6	10	5	508
CAALFM_C101070CA (KRP1)	XP_712139.1	ENP2	2|6	8	4	2	0|0	0.99	1	0.99	1	0.99	4.08	40	0		2|6	8	4	750
CAALFM_C101070CA (KRP1)	XP_711291.1	SSF1	2|5	7	3.5	2	0|0	0.99	1	0.99	1	0.99	4.08	35	0		2|5	7	3.5	377
CAALFM_C101070CA (KRP1)	XP_710791.1	CDC54	2|5	7	3.5	2	0|0	0.99	1	0.99	1	0.99	4.08	35	0		2|5	7	3.5	912
CAALFM_C101070CA (KRP1)	XP_710002.1	RRP15	5|4	9	4.5	2	0|0	1	1	1	1	1	7.67	45	0		5|4	9	4.5	255
CAALFM_C101070CA (KRP1)	XP_716067.1	DOT1	4|3	7	3.5	2	0|0	1	1	1	1	1	5.92	35	0		4|3	7	3.5	1343	DOT1_CANAL
CAALFM_C101070CA (KRP1)	XP_710970.1	CaO19.10731	2|4	6	3	2	0|0	0.99	1	0.99	1	0.99	4.08	30	0		2|4	6	3	201
CAALFM_C101070CA (KRP1)	XP_716615.1	CTA4	2|2	4	2	2	0|0	0.98	0.98	0.98	0.98	0.98	4.08	20	0		2|2	4	2	1016
CAALFM_C101070CA (KRP1)	XP_716446.1	ERG13	3|3	6	3	2	0|0	1	1	1	1	1	5.92	30	0		3|3	6	3	451
CAALFM_C101070CA (KRP1)	XP_715234.1	UME1	2|2	4	2	2	0|0	0.98	0.98	0.98	0.98	0.98	4.08	20	0		2|2	4	2	485
CAALFM_C101070CA (KRP1)	XP_710836.1	CHC1	4|4	8	4	2	0|0	1	1	1	1	1	7.67	40	0		4|4	8	4	1671
CAALFM_C101070CA (KRP1)	XP_722497.1	CAALFM_C201420CA	2|5	7	3.5	2	0|0	0.99	1	0.99	1	0.99	4.08	35	0		2|5	7	3.5	538
CAALFM_C101070CA (KRP1)	XP_720724.1	STB4	2|7	9	4.5	2	0|0	0.99	1	0.99	1	0.99	4.08	45	0		2|7	9	4.5	890
CAALFM_C101070CA (KRP1)	XP_713111.1	CaO19.8348	2|4	6	3	2	0|0	0.99	1	0.99	1	0.99	4.08	30	0		2|4	6	3	269
CAALFM_C101070CA (KRP1)	XP_718658.1	NAP1	4|6	10	5	2	0|0	1	1	1	1	1	7.67	50	0		4|6	10	5	435	NAP1_CANAL
CAALFM_C101070CA (KRP1)	XP_721749.1	CAALFM_C301720CA	2|8	10	5	2	0|0	0.99	1	0.99	1	0.99	4.08	50	0		2|8	10	5	1221
CAALFM_C101070CA (KRP1)	XP_716585.1	CAALFM_C405900CA	2|2	4	2	2	0|0	0.98	0.98	0.98	0.98	0.98	4.08	20	0		2|2	4	2	392
CAALFM_C101070CA (KRP1)	XP_721434.1	RPL10	13|11	24	12	2	5|3	0.86	0.97	0.86	0.97	0.86	1.13	3	0.01		13|11	24	12	220
CAALFM_C101070CA (KRP1)	XP_719361.1	UTP5	32|32	64	32	2	11|13	0.87	0.87	0.87	0.87	0.87	1.94	2.67	0.01		32|32	64	32	636
CAALFM_C101070CA (KRP1)	XP_719230.1	MRT4	3|6	9	4.5	2	2|0	0.82	0.95	0.81	0.95	0.82	0.75	4.5	0.01		3|6	9	4.5	230
CAALFM_C101070CA (KRP1)	XP_717779.1	SOF1	14|17	31	15.5	2	5|6	0.75	0.98	0.75	0.98	0.75	0.11	2.82	0.01		14|17	31	15.5	436
CAALFM_C101070CA (KRP1)	XP_715053.1	RPC10	5|3	8	4	2	0|2	0.79	0.91	0.79	0.91	0.79	0.75	4	0.01		5|3	8	4	102
CAALFM_C101070CA (KRP1)	XP_713993.1	UTP6	15|16	31	15.5	2	4|7	0.86	0.93	0.86	0.93	0.86	1.36	2.82	0.01		15|16	31	15.5	431
CAALFM_C101070CA (KRP1)	XP_712535.1	RPL1	41|38	79	39.5	2	17|5	0.82	0.9	0.82	0.9	0.82	1.05	3.59	0.01		41|38	79	39.5	217
CAALFM_C101070CA (KRP1)	XP_710786.1	CHR1	15|15	30	15	2	6|5	0.8	0.8	0.8	0.8	0.8	1.36	2.73	0.01		15|15	30	15	496	ROK1_CANAL
CAALFM_C101070CA (KRP1)	P13647	KRT5	178|8	186	93	2	6|0	0.76	1	0.83	1	0.83	0.7	31	0.01	P13645|P12035|P08779|P02533|P19012|	178|8	186	93	590	K2C5_HUMAN
CAALFM_C101070CA (KRP1)	XP_718756.1	RPS23	9|8	17	8.5	2	5|0	0.8	0.84	0.8	0.84	0.8	1.14	3.4	0.01		9|8	17	8.5	145
CAALFM_C101070CA (KRP1)	XP_714969.1	CaO19.11031	10|16	26	13	2	6|0	0.87	0.96	0.87	0.96	0.87	1.31	4.33	0.01		10|16	26	13	667
CAALFM_C101070CA (KRP1)	XP_714330.1	CIC1	19|18	37	18.5	2	11|0	0.75	0.79	0.75	0.79	0.75	0.88	3.36	0.01		19|18	37	18.5	365
CAALFM_C101070CA (KRP1)	XP_712242.1	ATP1	10|16	26	13	2	4|4	0.73	1	0.73	1	0.73	-0.13	3.25	0.01		10|16	26	13	447
CAALFM_C101070CA (KRP1)	XP_713700.1	HTA2	26|24	50	25	2	10|8	0.9	0.98	0.9	0.98	0.9	1.48	2.78	0.01		26|24	50	25	131
CAALFM_C101070CA (KRP1)	XP_722608.1	UTP21	21|21	42	21	2	4|10	0.67	0.67	0.67	0.67	0.67	0.69	3	0.02		21|21	42	21	942
CAALFM_C101070CA (KRP1)	XP_720317.1	CAALFM_C700910CA	5|6	11	5.5	2	0|4	0.62	0.71	0.61	0.71	0.62	0.09	2.75	0.02		5|6	11	5.5	393
CAALFM_C101070CA (KRP1)	XP_716442.1	TUB1	10|14	24	12	2	5|4	0.56	0.96	0.55	0.96	0.56	-1.76	2.67	0.02		10|14	24	12	323
CAALFM_C101070CA (KRP1)	XP_714997.1	CDC19	23|23	46	23	2	11|6	0.67	0.67	0.67	0.67	0.67	0.71	2.71	0.02		23|23	46	23	504
CAALFM_C101070CA (KRP1)	XP_714681.1	YST1	5|3	8	4	2	3|0	0.57	0.78	0.57	0.78	0.57	-0.57	2.67	0.02		5|3	8	4	217	RSSA_CANAL
CAALFM_C101070CA (KRP1)	P35527	KRT9	209|33	242	121	2	0|21	0.66	1	0.66	1	0.66	-0.73	11.52	0.02		209|33	242	121	623	K1C9_HUMAN
CAALFM_C101070CA (KRP1)	XP_722325.1	ACT1	14|19	33	16.5	2	2|8	0.68	0.93	0.68	0.93	0.68	-0.27	3.3	0.02		14|19	33	16.5	360
CAALFM_C101070CA (KRP1)	XP_722520.1	RPS26A	20|26	46	23	2	11|6	0.52	0.98	0.52	0.98	0.52	-2.64	2.71	0.03		20|26	46	23	119
CAALFM_C101070CA (KRP1)	XP_717966.1	PWP2	24|34	58	29	2	13|6	0.52	0.99	0.52	0.99	0.52	-2.91	3.05	0.03		24|34	58	29	922
CAALFM_C101070CA (KRP1)	XP_714962.1	MAK5	7|17	24	12	2	5|2	0.54	1	0.54	1	0.54	-2.39	3.43	0.03		7|17	24	12	782
CAALFM_C101070CA (KRP1)	P04264	KRT1	296|51	347	173.5	2	26|28	0.5	1	0.5	1	0.5	-22.08	6.43	0.03	P35908|P13647|P13645|P35527|Q7Z794|	296|51	347	173.5	643	K2C1_HUMAN
CAALFM_C101070CA (KRP1)	P02538	KRT6A	192|0	192	96	2	0|0	0.5	1	0.5	1	0.5	-0.26	960	0.03	Q04695|P19012|	192|0	192	96	564	K2C6A_HUMAN
CAALFM_C101070CA (KRP1)	P04259	KRT6B	187|0	187	93.5	2	0|0	0.5	1	0.5	1	0.5	-0.36	935	0.03	P19012|	187|0	187	93.5	564	K2C6B_HUMAN
CAALFM_C101070CA (KRP1)	P12035	KRT3	56|0	56	28	2	0|0	0.5	1	0.5	1	0.5	-0.26	280	0.03	P02533|	56|0	56	28	629	K2C3_HUMAN
CAALFM_C101070CA (KRP1)	Q01546	KRT76	48|0	48	24	2	0|0	0.5	1	0.5	1	0.5	-0.46	240	0.03		48|0	48	24	638	K22O_HUMAN
CAALFM_C101070CA (KRP1)	P19013	KRT4	30|0	30	15	2	0|0	0.5	1	0.5	1	0.5	-0.36	150	0.03	P19012|	30|0	30	15	594	B4DRS2_HUMAN
CAALFM_C101070CA (KRP1)	P08779	KRT16	188|0	188	94	2	0|0	0.5	1	0.5	1	0.5	-0.46	940	0.03		188|0	188	94	473	K1C16_HUMAN
CAALFM_C101070CA (KRP1)	Q04695	KRT17	88|0	88	44	2	0|0	0.5	1	0.5	1	0.5	-0.46	440	0.03		88|0	88	44	432	K1C17_HUMAN
CAALFM_C101070CA (KRP1)	P19012	KRT15	68|0	68	34	2	0|0	0.5	1	0.5	1	0.5	-0.46	340	0.03		68|0	68	34	456	K1C15_HUMAN
CAALFM_C101070CA (KRP1)	P19001	Krt19	29|0	29	14.5	2	0|0	0.5	1	0.5	1	0.5	-0.46	145	0.03		29|0	29	14.5	403	B1AQ78_MOUSE
CAALFM_C101070CA (KRP1)	K1C15_SHEEP	LOC101117682	60|0	60	30	2	0|0	0.5	1	0.5	1	0.5	-0.46	300	0.03		60|0	60	30	453	K1C15_SHEEP
CAALFM_C101070CA (KRP1)	Q3ZAW8	Krt16	61|0	61	30.5	2	0|0	0.5	1	0.5	1	0.5	-0.46	305	0.03		61|0	61	30.5	474	K1C16_MOUSE
CAALFM_C101070CA (KRP1)	Q7RTT2	KRT78	21|0	21	10.5	2	0|0	0.5	1	0.5	1	0.5	-0.46	105	0.05		21|0	21	10.5	521	K2C78_HUMAN
CAALFM_C101070CA (KRP1)	Q7Z794	KRT77	23|0	23	11.5	2	0|0	0.5	1	0.5	1	0.5	-0.36	115	0.05	P19012|	23|0	23	11.5	578	K2C1B_HUMAN
CAALFM_C101070CA (KRP1)	Q86YZ3	HRNR	18|0	18	9	2	0|0	0.5	1	0.5	1	0.5	-0.46	90	0.06		18|0	18	9	2850	HORN_HUMAN
CAALFM_C101070CA (KRP1)	P35908	KRT2	109|11	120	60	2	19|9	0.5	1	0.5	1	0.5	-32.67	4.29	0.06	P13647|P13645|Q7Z794|	109|11	120	60	645	K22E_HUMAN
CAALFM_C101070CA (KRP1)	P13645	KRT10	109|39	148	74	2	33|22	0.5	1	0.5	1	0.5	-40.92	2.69	0.06	Q7Z794|P08779|	109|39	148	74	593	K1C10_HUMAN
CAALFM_C101070CA (KRP1)	Q61782	Krt14	16|0	16	8	2	0|0	0.5	1	0.5	1	0.5	-0.46	80	0.06		16|0	16	8	93	K1C14_MOUSE
CAALFM_C101070CA (KRP1)	Q2M2I5	KRT24	11|0	11	5.5	2	0|0	0.5	1	0.5	1	0.5	-0.46	55	0.06		11|0	11	5.5	525	K1C24_HUMAN
CAALFM_C101070CA (KRP1)	Q9U6Y5	Q9U6Y5	0|11	11	5.5	2	0|0	0.5	1	0.5	1	0.5	-0.46	55	0.06		0|11	11	5.5	249
CAALFM_C101070CA (KRP1)	XP_711563.1	RPG1A	0|19	19	9.5	2	0|0	0.5	1	0.5	1	0.5	-0.46	95	0.06		0|19	19	9.5	930	EIF3A_CANAL
CAALFM_C101070CA (KRP1)	XP_722834.1	POL30	0|8	8	4	2	0|0	0.5	1	0.5	1	0.5	-0.46	40	0.07		0|8	8	4	259
CAALFM_C101070CA (KRP1)	XP_721568.1	KRI1	0|10	10	5	2	0|0	0.5	1	0.5	1	0.5	-0.46	50	0.07		0|10	10	5	668
CAALFM_C101070CA (KRP1)	XP_716629.1	PBS2	0|8	8	4	2	0|0	0.5	1	0.5	1	0.5	-0.46	40	0.07		0|8	8	4	545
CAALFM_C101070CA (KRP1)	XP_715347.1	ALD5	0|8	8	4	2	0|0	0.5	1	0.5	1	0.5	-0.46	40	0.07		0|8	8	4	499
CAALFM_C101070CA (KRP1)	XP_714492.1	CaO19.11082	0|10	10	5	2	0|0	0.5	1	0.5	1	0.5	-0.46	50	0.07		0|10	10	5	519
CAALFM_C101070CA (KRP1)	XP_721143.1	GPM1	7|0	7	3.5	2	0|0	0.5	1	0.5	1	0.5	-0.46	35	0.08		7|0	7	3.5	248
CAALFM_C101070CA (KRP1)	XP_715480.1	CaO19.10613	5|0	5	2.5	2	0|0	0.5	1	0.5	1	0.5	-0.46	25	0.08		5|0	5	2.5	764
CAALFM_C101070CA (KRP1)	XP_713973.1	CaO19.9846	5|0	5	2.5	2	0|0	0.5	1	0.5	1	0.5	-0.46	25	0.08		5|0	5	2.5	281
CAALFM_C101070CA (KRP1)	XP_720513.1	CAALFM_C402400CA	0|5	5	2.5	2	0|0	0.5	1	0.5	1	0.5	-0.46	25	0.08		0|5	5	2.5	804
CAALFM_C101070CA (KRP1)	XP_720313.1	YML6	0|7	7	3.5	2	0|0	0.5	1	0.5	1	0.5	-0.46	35	0.08		0|7	7	3.5	278
CAALFM_C101070CA (KRP1)	XP_718663.1	CAALFM_CR00280CA	0|7	7	3.5	2	0|0	0.5	1	0.5	1	0.5	-0.46	35	0.08		0|7	7	3.5	407
CAALFM_C101070CA (KRP1)	XP_717648.1	TKL1	0|5	5	2.5	2	0|0	0.5	1	0.5	1	0.5	-0.46	25	0.08		0|5	5	2.5	677
CAALFM_C101070CA (KRP1)	XP_715369.1	CAALFM_C202770WA	0|6	6	3	2	0|0	0.5	1	0.5	1	0.5	-0.46	30	0.08		0|6	6	3	717
CAALFM_C101070CA (KRP1)	XP_712545.1	HRR25	0|7	7	3.5	2	0|0	0.5	1	0.5	1	0.5	-0.46	35	0.08		0|7	7	3.5	433
CAALFM_C101070CA (KRP1)	XP_711116.1	RPB8	0|5	5	2.5	2	0|0	0.5	1	0.5	1	0.5	-0.46	25	0.08		0|5	5	2.5	148
CAALFM_C101070CA (KRP1)	XP_715712.1	VPS1	0|5	5	2.5	2	0|0	0.5	1	0.5	1	0.5	-0.46	25	0.08		0|5	5	2.5	693
CAALFM_C101070CA (KRP1)	XP_720339.1	CaO19.7047	4|0	4	2	2	0|0	0.5	1	0.5	1	0.5	-0.46	20	0.09		4|0	4	2	233
CAALFM_C101070CA (KRP1)	XP_719248.1	SRC1	4|0	4	2	2	0|0	0.5	1	0.5	1	0.5	-0.46	20	0.09		4|0	4	2	702
CAALFM_C101070CA (KRP1)	XP_713682.1	CaO19.8634	4|0	4	2	2	0|0	0.5	1	0.5	1	0.5	-0.46	20	0.09		4|0	4	2	403
CAALFM_C101070CA (KRP1)	XP_711908.1	ECM22	4|0	4	2	2	0|0	0.5	1	0.5	1	0.5	-0.46	20	0.09		4|0	4	2	712
CAALFM_C101070CA (KRP1)	XP_721545.1	CAALFM_C103450CA	4|0	4	2	2	0|0	0.5	1	0.5	1	0.5	-0.46	20	0.09		4|0	4	2	1209
CAALFM_C101070CA (KRP1)	XP_721802.1	CAALFM_C301210CA	0|4	4	2	2	0|0	0.5	1	0.5	1	0.5	-0.46	20	0.09		0|4	4	2	136
CAALFM_C101070CA (KRP1)	XP_721803.1	CaO19.1732	0|4	4	2	2	0|0	0.5	1	0.5	1	0.5	-0.46	20	0.09		0|4	4	2	620
CAALFM_C101070CA (KRP1)	XP_719908.1	CAALFM_C306880WA	0|4	4	2	2	0|0	0.5	1	0.5	1	0.5	-0.46	20	0.09		0|4	4	2	267
CAALFM_C101070CA (KRP1)	XP_719009.1	TUF1	0|4	4	2	2	0|0	0.5	1	0.5	1	0.5	-0.46	20	0.09		0|4	4	2	426
CAALFM_C101070CA (KRP1)	XP_717977.1	BUD22	0|4	4	2	2	0|0	0.5	1	0.5	1	0.5	-0.46	20	0.09		0|4	4	2	237
CAALFM_C101070CA (KRP1)	XP_717483.1	SEC26	0|4	4	2	2	0|0	0.5	1	0.5	1	0.5	-0.46	20	0.09		0|4	4	2	952
CAALFM_C101070CA (KRP1)	XP_713399.1	CaO19.13116	0|4	4	2	2	0|0	0.5	1	0.5	1	0.5	-0.46	20	0.09		0|4	4	2	811
CAALFM_C101070CA (KRP1)	XP_721473.1	YKT6	0|4	4	2	2	0|0	0.5	1	0.5	1	0.5	-0.46	20	0.09		0|4	4	2	200
CAALFM_C101070CA (KRP1)	XP_718858.1	CAALFM_C106400CA	0|4	4	2	2	0|0	0.5	1	0.5	1	0.5	-0.46	20	0.09		0|4	4	2	710
CAALFM_C101070CA (KRP1)	XP_710664.1	MEC1	0|4	4	2	2	0|0	0.5	1	0.5	1	0.5	-0.46	20	0.09		0|4	4	2	2325	ATR_CANAL
CAALFM_C101070CA (KRP1)	Q5D862	FLG2	3|0	3	1.5	2	0|0	0.5	1	0.5	1	0.5	-0.46	15	0.11		3|0	3	1.5	2391	FILA2_HUMAN
CAALFM_C101070CA (KRP1)	XP_722317.1	CHA4	3|0	3	1.5	2	0|0	0.5	1	0.5	1	0.5	-0.46	15	0.11		3|0	3	1.5	696
CAALFM_C101070CA (KRP1)	XP_717456.1	ARP5	3|0	3	1.5	2	0|0	0.5	1	0.5	1	0.5	-0.46	15	0.11		3|0	3	1.5	776
CAALFM_C101070CA (KRP1)	XP_715824.1	DAL80	3|0	3	1.5	2	0|0	0.5	1	0.5	1	0.5	-0.46	15	0.11		3|0	3	1.5	715
CAALFM_C101070CA (KRP1)	XP_712474.1	DBP7	3|0	3	1.5	2	0|0	0.5	1	0.5	1	0.5	-0.46	15	0.11		3|0	3	1.5	727	DBP7_CANAL
CAALFM_C101070CA (KRP1)	XP_721105.1	CaO19.8480	3|0	3	1.5	2	0|0	0.5	1	0.5	1	0.5	-0.46	15	0.11		3|0	3	1.5	176
CAALFM_C101070CA (KRP1)	XP_716962.1	CAALFM_C703160WA	3|0	3	1.5	2	0|0	0.5	1	0.5	1	0.5	-0.46	15	0.11		3|0	3	1.5	745
CAALFM_C101070CA (KRP1)	XP_722569.1	CAALFM_C202090WA	0|3	3	1.5	2	0|0	0.5	1	0.5	1	0.5	-0.46	15	0.11		0|3	3	1.5	398	NMD4_CANAL
CAALFM_C101070CA (KRP1)	XP_717602.1	MRPL3	0|3	3	1.5	2	0|0	0.5	1	0.5	1	0.5	-0.46	15	0.11		0|3	3	1.5	404
CAALFM_C101070CA (KRP1)	XP_712587.1	CDC47	0|3	3	1.5	2	0|0	0.5	1	0.5	1	0.5	-0.46	15	0.11		0|3	3	1.5	809
CAALFM_C101070CA (KRP1)	XP_711761.1	LHP1	0|3	3	1.5	2	0|0	0.5	1	0.5	1	0.5	-0.46	15	0.11		0|3	3	1.5	324
CAALFM_C101070CA (KRP1)	XP_711503.1	CDC46	0|3	3	1.5	2	0|0	0.5	1	0.5	1	0.5	-0.46	15	0.11		0|3	3	1.5	728
CAALFM_C101070CA (KRP1)	XP_710759.1	TBP1	0|3	3	1.5	2	0|0	0.5	1	0.5	1	0.5	-0.46	15	0.11		0|3	3	1.5	238
CAALFM_C101070CA (KRP1)	XP_712915.1	CAALFM_C204620WA	0|3	3	1.5	2	0|0	0.5	1	0.5	1	0.5	-0.46	15	0.11		0|3	3	1.5	971
CAALFM_C101070CA (KRP1)	XP_716428.1	MPS1	0|3	3	1.5	2	0|0	0.5	1	0.5	1	0.5	-0.46	15	0.11		0|3	3	1.5	690
CAALFM_C101070CA (KRP1)	XP_720367.1	GBP2	2|0	2	1	2	0|0	0.49	0.98	0.49	0.98	0.49	-0.46	10	0.13		2|0	2	1	297
CAALFM_C101070CA (KRP1)	XP_717614.1	PFY1	2|0	2	1	2	0|0	0.49	0.98	0.49	0.98	0.49	-0.46	10	0.13		2|0	2	1	126
CAALFM_C101070CA (KRP1)	XP_715374.1	CAALFM_C202720WA	2|0	2	1	2	0|0	0.49	0.98	0.49	0.98	0.49	-0.46	10	0.13		2|0	2	1	1002
CAALFM_C101070CA (KRP1)	XP_715139.1	SGD1	2|0	2	1	2	0|0	0.49	0.98	0.49	0.98	0.49	-0.46	10	0.13		2|0	2	1	1011
CAALFM_C101070CA (KRP1)	XP_719815.1	ABD1	2|0	2	1	2	0|0	0.49	0.98	0.49	0.98	0.49	-0.46	10	0.13		2|0	2	1	474	MCES_CANAL
CAALFM_C101070CA (KRP1)	XP_716082.1	TSA1	2|0	2	1	2	0|0	0.49	0.98	0.49	0.98	0.49	-0.46	10	0.13		2|0	2	1	196	TSA1_CANAL
CAALFM_C101070CA (KRP1)	XP_711417.1	CAALFM_C503550WA	2|0	2	1	2	0|0	0.49	0.98	0.49	0.98	0.49	-0.46	10	0.13		2|0	2	1	806
CAALFM_C101070CA (KRP1)	XP_723141.1	CAALFM_C304690CA	2|0	2	1	2	0|0	0.49	0.98	0.49	0.98	0.49	-0.46	10	0.13		2|0	2	1	340
CAALFM_C101070CA (KRP1)	XP_716405.1	CAF120	2|0	2	1	2	0|0	0.49	0.98	0.49	0.98	0.49	-0.46	10	0.13		2|0	2	1	1021
CAALFM_C101070CA (KRP1)	XP_714280.1	PMT4	2|0	2	1	2	0|0	0.49	0.98	0.49	0.98	0.49	-0.46	10	0.13		2|0	2	1	755	PMT4_CANAL
CAALFM_C101070CA (KRP1)	XP_719862.1	NOP13	2|0	2	1	2	0|0	0.49	0.98	0.49	0.98	0.49	-0.46	10	0.13		2|0	2	1	396
CAALFM_C101070CA (KRP1)	XP_721998.1	CaO19.11410	0|2	2	1	2	0|0	0.49	0.98	0.49	0.98	0.49	-0.46	10	0.13		0|2	2	1	380
CAALFM_C101070CA (KRP1)	XP_721107.1	MRPL35	0|2	2	1	2	0|0	0.49	0.98	0.49	0.98	0.49	-0.46	10	0.13		0|2	2	1	378
CAALFM_C101070CA (KRP1)	XP_717440.1	MEX67	0|2	2	1	2	0|0	0.49	0.98	0.49	0.98	0.49	-0.46	10	0.13		0|2	2	1	617
CAALFM_C101070CA (KRP1)	XP_716956.1	ZCF29	0|2	2	1	2	0|0	0.49	0.98	0.49	0.98	0.49	-0.46	10	0.13		0|2	2	1	1105
CAALFM_C101070CA (KRP1)	XP_716852.1	XDJ1	0|2	2	1	2	0|0	0.49	0.98	0.49	0.98	0.49	-0.46	10	0.13		0|2	2	1	439
CAALFM_C101070CA (KRP1)	XP_716609.1	CAALFM_C305880CA	0|2	2	1	2	0|0	0.49	0.98	0.49	0.98	0.49	-0.46	10	0.13		0|2	2	1	510
CAALFM_C101070CA (KRP1)	XP_716539.1	CAALFM_C107690CA	0|2	2	1	2	0|0	0.49	0.98	0.49	0.98	0.49	-0.46	10	0.13		0|2	2	1	452
CAALFM_C101070CA (KRP1)	XP_716097.1	AAF1	0|2	2	1	2	0|0	0.49	0.98	0.49	0.98	0.49	-0.46	10	0.13		0|2	2	1	612	ADF1_CANAL
CAALFM_C101070CA (KRP1)	XP_715131.1	MCM2	0|2	2	1	2	0|0	0.49	0.98	0.49	0.98	0.49	-0.46	10	0.13		0|2	2	1	903
CAALFM_C101070CA (KRP1)	XP_710518.1	CAALFM_C500080CA	0|2	2	1	2	0|0	0.49	0.98	0.49	0.98	0.49	-0.46	10	0.13		0|2	2	1	311
CAALFM_C101070CA (KRP1)	XP_710312.1	TRP5	0|2	2	1	2	0|0	0.49	0.98	0.49	0.98	0.49	-0.46	10	0.13		0|2	2	1	702
CAALFM_C101070CA (KRP1)	XP_717324.1	MRP8	0|2	2	1	2	0|0	0.49	0.98	0.49	0.98	0.49	-0.46	10	0.13		0|2	2	1	205
CAALFM_C101070CA (KRP1)	XP_721468.1	RAD16	0|2	2	1	2	0|0	0.49	0.98	0.49	0.98	0.49	-0.46	10	0.13		0|2	2	1	852
CAALFM_C101070CA (KRP1)	XP_713174.1	SWR1	0|2	2	1	2	0|0	0.49	0.98	0.49	0.98	0.49	-0.46	10	0.13		0|2	2	1	1641
CAALFM_C101070CA (KRP1)	XP_712099.1	CAALFM_C604290WA	0|2	2	1	2	0|0	0.49	0.98	0.49	0.98	0.49	-0.46	10	0.13		0|2	2	1	622
CAALFM_C101070CA (KRP1)	XP_723409.1	RTG1	0|2	2	1	2	0|0	0.49	0.98	0.49	0.98	0.49	-0.46	10	0.13		0|2	2	1	274
CAALFM_C101070CA (KRP1)	XP_723136.1	ZCF31	95|115	210	105	2	43|17	0.43	0.85	0.43	0.85	0.43	-5.4	3.5	0.16		95|115	210	105	1130
CAALFM_C101070CA (KRP1)	XP_721071.1	GCD7	2|2	4	2	2	0|2	0.41	0.41	0.41	0.41	0.41	-0.37	2	0.16		2|2	4	2	365
CAALFM_C101070CA (KRP1)	XP_715018.1	RPL4B	49|47	96	48	2	17|21	0.45	0.72	0.45	0.72	0.45	-1.57	2.53	0.16		49|47	96	48	363
CAALFM_C101070CA (KRP1)	XP_714230.1	IMP4	14|10	24	12	2	5|5	0.44	0.85	0.44	0.84	0.44	-3.42	2.4	0.16		14|10	24	12	283
CAALFM_C101070CA (KRP1)	XP_710448.1	UTP20	2|6	8	4	2	2|2	0.39	0.78	0.39	0.78	0.39	-4.17	2	0.16		2|6	8	4	1197
CAALFM_C101070CA (KRP1)	XP_723521.1	CAALFM_C109710CA	20|19	39	19.5	2	9|7	0.29	0.42	0.29	0.42	0.29	-1.61	2.44	0.17		20|19	39	19.5	527
CAALFM_C101070CA (KRP1)	XP_720704.1	CaO19.11744	22|33	55	27.5	2	15|11	0.25	0.51	0.25	0.5	0.25	-14.34	2.12	0.17		22|33	55	27.5	799
CAALFM_C101070CA (KRP1)	XP_719211.1	NAB3	3|3	6	3	2	3|0	0.36	0.36	0.36	0.36	0.36	-0.57	2	0.17		3|3	6	3	836
CAALFM_C101070CA (KRP1)	XP_717269.1	RPL24	37|26	63	31.5	2	17|12	0.28	0.56	0.28	0.56	0.28	-14.02	2.17	0.17		37|26	63	31.5	155
CAALFM_C101070CA (KRP1)	XP_716951.1	CAALFM_C703270WA	5|6	11	5.5	2	3|2	0.28	0.41	0.28	0.41	0.28	-1.68	2.2	0.17		5|6	11	5.5	397
CAALFM_C101070CA (KRP1)	XP_721830.1	CAALFM_C504340WA	11|5	16	8	2	8|0	0.24	0.48	0.24	0.48	0.24	-5.88	2	0.17		11|5	16	8	299
CAALFM_C101070CA (KRP1)	XP_719595.1	MRPL16	2|4	6	3	2	0|3	0.37	0.61	0.37	0.61	0.37	-1.88	2	0.17		2|4	6	3	213
CAALFM_C101070CA (KRP1)	XP_721688.1	CAALFM_C302350WA	6|0	6	3	2	5|0	0.21	0.43	0.21	0.43	0.21	-9.34	1.2	0.18		6|0	6	3	666
CAALFM_C101070CA (KRP1)	XP_719345.1	ZCF39	9|6	15	7.5	2	0|7	0.23	0.42	0.23	0.42	0.23	-3.05	2.14	0.18		9|6	15	7.5	681
CAALFM_C101070CA (KRP1)	XP_719379.1	CAALFM_CR10410CA	4|4	8	4	2	2|2	0.21	0.21	0.21	0.21	0.21	-1.33	2	0.18		4|4	8	4	276	PNO1_CANAL
CAALFM_C101070CA (KRP1)	XP_714655.1	SGN11	15|13	28	14	2	11|0	0.22	0.33	0.22	0.33	0.22	-2.08	2.55	0.18		15|13	28	14	163
CAALFM_C101070CA (KRP1)	XP_717098.1	PDB1	0|2	2	1	2	0|2	0.21	0.41	0.2	0.41	0.21	-3.25	1	0.18		0|2	2	1	379
CAALFM_C101070CA (KRP1)	XP_718070.1	NOG2	0|2	2	1	2	0|2	0.21	0.41	0.2	0.41	0.21	-3.25	1	0.18		0|2	2	1	297
CAALFM_C101070CA (KRP1)	XP_723501.1	YTM1	21|25	46	23	2	11|9	0.2	0.39	0.2	0.39	0.2	-5.58	2.3	0.19		21|25	46	23	466	YTM1_CANAL
CAALFM_C101070CA (KRP1)	XP_718354.1	RPA43	5|7	12	6	2	3|3	0.18	0.33	0.18	0.33	0.18	-3.39	2	0.19		5|7	12	6	299
CAALFM_C101070CA (KRP1)	XP_714974.1	RPF2	11|12	23	11.5	2	3|7	0.15	0.21	0.15	0.21	0.15	-2.43	2.3	0.19		11|12	23	11.5	327
CAALFM_C101070CA (KRP1)	XP_716558.1	CAALFM_C405650WA	0|3	3	1.5	2	0|3	0.18	0.36	0.18	0.36	0.18	-5.42	1	0.19		0|3	3	1.5	328
CAALFM_C101070CA (KRP1)	P08727	KRT19	0|7	7	3.5	2	6|0	0.17	0.33	0.19	0.38	0.19	-11.01	1.17	0.19	P04259|P19012|	0|7	7	3.5	400	K1C19_HUMAN
CAALFM_C101070CA (KRP1)	XP_723170.1	NOP14	17|13	30	15	2	7|7	0.14	0.29	0.14	0.28	0.14	-6.14	2.14	0.2		17|13	30	15	842
CAALFM_C101070CA (KRP1)	XP_720719.1	CaO19.11759	2|2	4	2	2	0|3	0.13	0.13	0.13	0.13	0.13	-1.88	1.33	0.2		2|2	4	2	335
CAALFM_C101070CA (KRP1)	XP_719422.1	CAALFM_CR10740WA	5|3	8	4	2	0|5	0.13	0.23	0.12	0.23	0.13	-3.71	1.6	0.2		5|3	8	4	225
CAALFM_C101070CA (KRP1)	XP_718427.1	RPS2	31|25	56	28	2	15|10	0.15	0.29	0.14	0.29	0.15	-8.64	2.24	0.2		31|25	56	28	249
CAALFM_C101070CA (KRP1)	XP_717643.1	DIP2	25|27	52	26	2	10|12	0.13	0.24	0.13	0.24	0.13	-3.69	2.36	0.2		25|27	52	26	981
CAALFM_C101070CA (KRP1)	XP_716703.1	CAALFM_C601890CA	17|16	33	16.5	2	13|0	0.13	0.17	0.13	0.17	0.13	-2.25	2.54	0.2		17|16	33	16.5	574	DBP9_CANAL
CAALFM_C101070CA (KRP1)	XP_719603.1	RFC5	16|16	32	16	2	13|0	0.1	0.1	0.1	0.1	0.1	-2.25	2.46	0.21		16|16	32	16	362
CAALFM_C101070CA (KRP1)	XP_718541.1	SSE1	5|10	15	7.5	2	0|9	0.06	0.12	0.06	0.12	0.06	-7.59	1.67	0.21		5|10	15	7.5	701
CAALFM_C101070CA (KRP1)	XP_712916.1	RPL17B	13|12	25	12.5	2	8|3	0.08	0.11	0.08	0.11	0.08	-3.07	2.27	0.21		13|12	25	12.5	185
CAALFM_C101070CA (KRP1)	XP_710461.1	MPP10	24|0	24	12	2	0|17	0.09	0.18	0.09	0.17	0.09	-35.01	1.41	0.21		24|0	24	12	547
CAALFM_C101070CA (KRP1)	XP_712725.1	HTA1	26|22	48	24	2	13|6	0.11	0.22	0.11	0.22	0.11	-4.68	2.53	0.21		26|22	48	24	132	H2A1_CANAL
CAALFM_C101070CA (KRP1)	XP_722300.1	HSP70	64|72	136	68	2	0|43	0.05	0.09	0.05	0.09	0.05	-5.55	3.16	0.22		64|72	136	68	656
CAALFM_C101070CA (KRP1)	XP_717587.1	CAALFM_C107790CA	10|11	21	10.5	2	3|7	0.05	0.08	0.05	0.08	0.05	-3.6	2.1	0.22		10|11	21	10.5	309
CAALFM_C101070CA (KRP1)	XP_713270.1	CaO19.9922	7|4	11	5.5	2	5|2	0.04	0.08	0.04	0.08	0.04	-6.52	1.57	0.22		7|4	11	5.5	247
CAALFM_C101070CA (KRP1)	XP_722066.1	ADH1	26|19	45	22.5	2	12|10	0.04	0.08	0.04	0.08	0.04	-11.6	2.05	0.22		26|19	45	22.5	435
CAALFM_C101070CA (KRP1)	XP_716466.1	ELF1	6|8	14	7	2	0|8	0.05	0.08	0.05	0.08	0.05	-4.58	1.75	0.22		6|8	14	7	1195
CAALFM_C101070CA (KRP1)	XP_721044.1	TAF14	5|6	11	5.5	2	0|7	0.03	0.05	0.03	0.05	0.03	-4.24	1.57	0.23		5|6	11	5.5	236
CAALFM_C101070CA (KRP1)	XP_715329.1	EFT2	13|13	26	13	2	2|10	0.03	0.03	0.03	0.03	0.03	-3.57	2.17	0.23		13|13	26	13	830	EF2_CANAL
CAALFM_C101070CA (KRP1)	XP_713608.1	CBC2	10|17	27	13.5	2	8|7	0.04	0.07	0.04	0.07	0.04	-11.99	1.8	0.23		10|17	27	13.5	224
CAALFM_C101070CA (KRP1)	XP_713199.1	CaO19.9452	28|24	52	26	2	5|16	0.02	0.04	0.02	0.04	0.02	-6.13	2.48	0.23		28|24	52	26	648
CAALFM_C101070CA (KRP1)	XP_710931.1	CAALFM_C307800CA	7|9	16	8	2	4|5	0.02	0.04	0.02	0.04	0.02	-5.79	1.78	0.23		7|9	16	8	207
CAALFM_C101070CA (KRP1)	XP_717144.1	RPS4A	65|56	121	60.5	2	40|0	0.03	0.07	0.03	0.07	0.03	-6.73	3.02	0.23		65|56	121	60.5	262
CAALFM_C101070CA (KRP1)	XP_720342.1	NOP15	12|11	23	11.5	2	5|7	0.01	0.02	0.01	0.02	0.01	-5.45	1.92	0.24		12|11	23	11.5	267
CAALFM_C101070CA (KRP1)	XP_719047.1	RPL16A	24|23	47	23.5	2	15|4	0.02	0.02	0.02	0.02	0.02	-4.46	2.47	0.24		24|23	47	23.5	200
CAALFM_C101070CA (KRP1)	XP_714654.1	CaO19.8966	8|11	19	9.5	2	5|6	0.01	0.02	0.01	0.02	0.01	-7.85	1.73	0.24		8|11	19	9.5	218
CAALFM_C101070CA (KRP1)	XP_712918.1	CAALFM_C204570WA	20|24	44	22	2	10|11	0.02	0.03	0.02	0.03	0.02	-8.57	2.1	0.24		20|24	44	22	426
CAALFM_C101070CA (KRP1)	XP_712796.1	RLP24	5|3	8	4	2	3|3	0.02	0.03	0.02	0.03	0.02	-6.24	1.33	0.24		5|3	8	4	209
CAALFM_C101070CA (KRP1)	XP_721086.1	RPL21	14|12	26	13	2	8|6	0	0.01	0	0.01	0	-7.49	1.86	0.25		14|12	26	13	109
CAALFM_C101070CA (KRP1)	XP_719372.1	TRX1	17|15	32	16	2	12|3	0.01	0.02	0.01	0.02	0.01	-5.88	2.13	0.25		17|15	32	16	103
CAALFM_C101070CA (KRP1)	XP_717453.1	NOP2	6|8	14	7	2	2|7	0.01	0.01	0.01	0.01	0.01	-6.8	1.56	0.25		6|8	14	7	618
CAALFM_C101070CA (KRP1)	XP_712942.1	CAALFM_C204370WA	5|6	11	5.5	2	0|8	0.01	0.01	0.01	0.01	0.01	-5.88	1.38	0.25		5|6	11	5.5	410
CAALFM_C101070CA (KRP1)	XP_711924.1	GCD6	7|9	16	8	2	4|6	0	0.01	0	0.01	0	-7.52	1.6	0.25		7|9	16	8	732
CAALFM_C101070CA (KRP1)	XP_721712.1	RPL12	22|24	46	23	2	15|6	0	0	0	0	0	-7.72	2.19	0.26		22|24	46	23	165
CAALFM_C101070CA (KRP1)	XP_720312.1	RPS18	16|15	31	15.5	2	11|5	0	0	0	0	0	-7.31	1.94	0.26		16|15	31	15.5	135
CAALFM_C101070CA (KRP1)	XP_718996.1	TUB2	11|12	23	11.5	2	9|4	0	0	0	0	0	-7.22	1.77	0.26		11|12	23	11.5	303
CAALFM_C101070CA (KRP1)	XP_717445.1	RPL15	22|21	43	21.5	2	13|7	0	0	0	0	0	-6.55	2.15	0.26		22|21	43	21.5	204
CAALFM_C101070CA (KRP1)	XP_714072.1	SKP1	5|4	9	4.5	2	3|4	0	0.01	0	0.01	0	-6.55	1.29	0.26		5|4	9	4.5	164
CAALFM_C101070CA (KRP1)	XP_711509.1	GSP1	0|4	4	2	2	0|7	0	0	0	0	0	-13.47	0.57	0.26		0|4	4	2	214
CAALFM_C101070CA (KRP1)	XP_719385.1	CAALFM_CR10470CA	5|9	14	7	2	3|8	0	0	0	0	0	-11.88	1.27	0.27		5|9	14	7	531	BFR2_CANAL
CAALFM_C101070CA (KRP1)	XP_717458.1	YDJ1	8|4	12	6	2	3|7	0	0	0	0	0	-11.7	1.2	0.27		8|4	12	6	393
CAALFM_C101070CA (KRP1)	XP_716092.1	APN1	6|7	13	6.5	2	0|10	0	0	0	0	0	-7.85	1.3	0.27		6|7	13	6.5	336
CAALFM_C101070CA (KRP1)	XP_715626.1	CaO19.10434	12|13	25	12.5	2	4|10	0	0	0	0	0	-7.61	1.79	0.27		12|13	25	12.5	526
CAALFM_C101070CA (KRP1)	XP_715467.1	UBI3	8|9	17	8.5	2	7|4	0	0	0	0	0	-7.85	1.55	0.27		8|9	17	8.5	193
CAALFM_C101070CA (KRP1)	XP_441044.1	CAALFM_CR06060WA	9|9	18	9	2	12|0	0	0	0	0	0	-7.26	1.5	0.28		9|9	18	9	257
CAALFM_C101070CA (KRP1)	XP_723118.1	RPL19A	6|6	12	6	2	5|4	0	0	0	0	0	-7.19	1.33	0.28		6|6	12	6	115
CAALFM_C101070CA (KRP1)	XP_723199.1	CAALFM_C305150WA	10|9	19	9.5	2	9|3	0	0	0	0	0	-7.92	1.58	0.28		10|9	19	9.5	475
CAALFM_C101070CA (KRP1)	XP_721466.1	TIF34	5|13	18	9	2	3|11	0	0	0	0	0	-16.91	1.29	0.28		5|13	18	9	350	EIF3I_CANAL
CAALFM_C101070CA (KRP1)	XP_716591.1	RCT1	5|0	5	2.5	2	4|4	0	0	0	0	0	-16.36	0.62	0.28		5|0	5	2.5	191
CAALFM_C101070CA (KRP1)	XP_723201.1	CAALFM_C305160CA	0|5	5	2.5	2	2|6	0	0	0	0	0	-16.12	0.62	0.28		0|5	5	2.5	908	DBP10_CANAL
CAALFM_C101070CA (KRP1)	XP_722291.1	KEM1	55|56	111	55.5	2	13|29	0	0	0	0	0	-8.62	2.64	0.29		55|56	111	55.5	1469
CAALFM_C101070CA (KRP1)	XP_719881.1	RPS12	8|7	15	7.5	2	6|5	0	0	0	0	0	-9.26	1.36	0.29		8|7	15	7.5	143
CAALFM_C101070CA (KRP1)	XP_715203.1	UTP18	13|12	25	12.5	2	7|8	0	0	0	0	0	-9.2	1.67	0.29		13|12	25	12.5	552
CAALFM_C101070CA (KRP1)	XP_712672.1	CaO19.9898	4|6	10	5	2	6|3	0	0	0	0	0	-10.09	1.11	0.29		4|6	10	5	281
CAALFM_C101070CA (KRP1)	XP_714521.1	RRP8	7|8	15	7.5	2	6|5	0	0	0	0	0	-9.26	1.36	0.29		7|8	15	7.5	428
CAALFM_C101070CA (KRP1)	XP_710480.1	MPP10	0|20	20	10	2	20|0	0	0	0	0	0	-41.52	1	0.29		0|20	20	10	567
CAALFM_C101070CA (KRP1)	XP_723571.1	CAALFM_C110190WA	6|8	14	7	2	7|5	0	0	0	0	0	-12.46	1.17	0.3		6|8	14	7	277
CAALFM_C101070CA (KRP1)	XP_722858.1	PWP1	13|21	34	17	2	4|17	0	0	0	0	0	-17.33	1.62	0.3		13|21	34	17	612
CAALFM_C101070CA (KRP1)	XP_722113.1	EST1	5|6	11	5.5	2	2|8	0	0	0	0	0	-9.85	1.1	0.3		5|6	11	5.5	612
CAALFM_C101070CA (KRP1)	XP_720467.1	SAS10	10|11	21	10.5	2	6|8	0	0	0	0	0	-10.25	1.5	0.3		10|11	21	10.5	564
CAALFM_C101070CA (KRP1)	XP_718416.1	TIF1	72|74	146	73	2	35|21	0	0	0	0	0	-10.93	2.61	0.3		72|74	146	73	397
CAALFM_C101070CA (KRP1)	XP_717837.1	RPS24	22|18	40	20	2	16|6	0	0	0	0	0	-13.19	1.82	0.3		22|18	40	20	135
CAALFM_C101070CA (KRP1)	XP_718645.1	CAALFM_CR00460CA	11|9	20	10	2	8|7	0	0	0	0	0	-13.41	1.33	0.31		11|9	20	10	183
CAALFM_C101070CA (KRP1)	XP_716215.1	RPS20	7|8	15	7.5	2	9|4	0	0	0	0	0	-12.54	1.15	0.31		7|8	15	7.5	119
CAALFM_C101070CA (KRP1)	XP_715375.1	CAALFM_C202710CA	7|6	13	6.5	2	5|7	0	0	0	0	0	-12.46	1.08	0.31		7|6	13	6.5	280
CAALFM_C101070CA (KRP1)	XP_714082.1	ISW1	42|35	77	38.5	2	7|29	0	0	0	0	0	-16.63	2.14	0.31		42|35	77	38.5	859
CAALFM_C101070CA (KRP1)	XP_710417.1	NOP4	24|25	49	24.5	2	18|7	0	0	0	0	0	-11.48	1.96	0.31		24|25	49	24.5	741
CAALFM_C101070CA (KRP1)	XP_722704.1	RPL20B	30|30	60	30	2	16|14	0	0	0	0	0	-10.38	2	0.31		30|30	60	30	172
CAALFM_C101070CA (KRP1)	XP_722853.1	NIP1	15|16	31	15.5	2	3|17	0	0	0	0	0	-13.14	1.55	0.32		15|16	31	15.5	874
CAALFM_C101070CA (KRP1)	XP_720328.1	RFC2	20|19	39	19.5	2	10|15	0	0	0	0	0	-16.73	1.56	0.32		20|19	39	19.5	363
CAALFM_C101070CA (KRP1)	XP_719690.1	NDT801	69|61	130	65	2	40|13	0	0	0	0	0	-17.8	2.45	0.32		69|61	130	65	504
CAALFM_C101070CA (KRP1)	XP_715811.1	RRP9	21|20	41	20.5	2	15|11	0	0	0	0	0	-17.07	1.58	0.32		21|20	41	20.5	549
CAALFM_C101070CA (KRP1)	XP_715840.1	SRP40	18|19	37	18.5	2	13|11	0	0	0	0	0	-16.39	1.54	0.32		18|19	37	18.5	378
CAALFM_C101070CA (KRP1)	XP_713834.1	KRR1	16|14	30	15	2	13|7	0	0	0	0	0	-14.99	1.5	0.32		16|14	30	15	358
CAALFM_C101070CA (KRP1)	XP_712831.1	RPS8	16|15	31	15.5	2	11|10	0	0	0	0	0	-15.38	1.48	0.32		16|15	31	15.5	206
CAALFM_C101070CA (KRP1)	XP_721420.1	PRT1	14|18	32	16	2	3|21	0	0	0	0	0	-20.84	1.33	0.33		14|18	32	16	739	EIF3B_CANAL
CAALFM_C101070CA (KRP1)	XP_720769.1	RPS5	27|29	56	28	2	19|14	0	0	0	0	0	-19.46	1.7	0.33		27|29	56	28	225
CAALFM_C101070CA (KRP1)	XP_719417.1	RFC4	19|9	28	14	2	8|17	0	0	0	0	0	-30.92	1.12	0.33		19|9	28	14	323
CAALFM_C101070CA (KRP1)	XP_719019.1	CAALFM_C100510WA	11|8	19	9.5	2	9|10	0	0	0	0	0	-21.94	1	0.33		11|8	19	9.5	309
CAALFM_C101070CA (KRP1)	XP_711114.1	RPS3	42|47	89	44.5	2	28|18	0	0	0	0	0	-23.16	1.93	0.33		42|47	89	44.5	251
CAALFM_C101070CA (KRP1)	XP_888925.1	CaJ7_0366	15|14	29	14.5	2	11|11	0	0	0	0	0	-18.53	1.32	0.33		15|14	29	14.5	105
CAALFM_C101070CA (KRP1)	XP_723101.1	CAALFM_C304380CA	24|35	59	29.5	2	20|20	0	0	0	0	0	-35.75	1.48	0.34		24|35	59	29.5	126	SNU13_CANAL
CAALFM_C101070CA (KRP1)	XP_723139.1	RPS15	20|18	38	19	2	16|12	0	0	0	0	0	-23.32	1.36	0.34		20|18	38	19	115
CAALFM_C101070CA (KRP1)	XP_723211.1	RPL8B	46|55	101	50.5	2	33|19	0	0	0	0	0	-28.68	1.94	0.34		46|55	101	50.5	262
CAALFM_C101070CA (KRP1)	XP_722877.1	RPS6	20|20	40	20	2	14|14	0	0	0	0	0	-20.52	1.43	0.34		20|20	40	20	205
CAALFM_C101070CA (KRP1)	XP_721533.1	CAALFM_C103360WA	10|9	19	9.5	2	6|13	0	0	0	0	0	-20.1	1	0.34		10|9	19	9.5	1410
CAALFM_C101070CA (KRP1)	XP_719810.1	UTP9	31|32	63	31.5	2	20|17	0	0	0	0	0	-20.83	1.7	0.34		31|32	63	31.5	445
CAALFM_C101070CA (KRP1)	XP_717620.1	DRG1	17|14	31	15.5	2	9|16	0	0	0	0	0	-23.55	1.24	0.34		17|14	31	15.5	368
CAALFM_C101070CA (KRP1)	XP_441054.1	RPL7	16|20	36	18	2	14|17	0	0	0	0	0	-31.44	1.16	0.35		16|20	36	18	295
CAALFM_C101070CA (KRP1)	XP_720463.1	HCA4	11|10	21	10.5	2	7|14	0	0	0	0	0	-22.22	1	0.35		11|10	21	10.5	765	DBP4_CANAL
CAALFM_C101070CA (KRP1)	XP_719593.1	RPA49	29|33	62	31	2	20|22	0	0	0	0	0	-32.18	1.48	0.35		29|33	62	31	393
CAALFM_C101070CA (KRP1)	XP_714264.1	PES1	40|38	78	39	2	26|21	0	0	0	0	0	-28.35	1.66	0.35		40|38	78	39	587	PESC_CANAL
CAALFM_C101070CA (KRP1)	XP_711917.1	CaO19.8030	22|25	47	23.5	2	10|24	0	0	0	0	0	-27.65	1.38	0.35		22|25	47	23.5	245
CAALFM_C101070CA (KRP1)	XP_711416.1	RPS25B	15|12	27	13.5	2	12|13	0	0	0	0	0	-26.67	1.08	0.35		15|12	27	13.5	105
CAALFM_C101070CA (KRP1)	XP_710962.1	RFC3	14|17	31	15.5	2	13|15	0	0	0	0	0	-29.05	1.11	0.35		14|17	31	15.5	361
CAALFM_C101070CA (KRP1)	XP_722031.1	HAS1	41|40	81	40.5	2	30|20	0	0	0	0	0	-31.65	1.62	0.36		41|40	81	40.5	569
CAALFM_C101070CA (KRP1)	XP_720441.1	NAN1	40|41	81	40.5	2	23|26	0	0	0	0	0	-29.03	1.65	0.36		40|41	81	40.5	839
CAALFM_C101070CA (KRP1)	XP_720065.1	RPL9	22|24	46	23	2	21|16	0	0	0	0	0	-33.35	1.24	0.36		22|24	46	23	191
CAALFM_C101070CA (KRP1)	XP_719387.1	EIF4E	14|10	24	12	2	9|18	0	0	0	0	0	-33	0.89	0.36		14|10	24	12	209	IF4E_CANAL
CAALFM_C101070CA (KRP1)	XP_718060.1	CAALFM_C603550CA	14|15	29	14.5	2	17|12	0	0	0	0	0	-30.82	1	0.36		14|15	29	14.5	539
CAALFM_C101070CA (KRP1)	XP_713042.1	SVL3	17|16	33	16.5	2	15|17	0	0	0	0	0	-33.2	1.03	0.36		17|16	33	16.5	976
CAALFM_C101070CA (KRP1)	XP_710946.1	SRB1	51|49	100	50	2	35|23	0	0	0	0	0	-34.06	1.72	0.36		51|49	100	50	362	MPG1_CANAL
CAALFM_C101070CA (KRP1)	XP_721710.1	UTP4	33|36	69	34.5	2	27|27	0	0	0	0	0	-47.41	1.28	0.37		33|36	69	34.5	743
CAALFM_C101070CA (KRP1)	XP_719909.1	TDH3	35|33	68	34	2	20|28	0	0	0	0	0	-37.02	1.42	0.37		35|33	68	34	335
CAALFM_C101070CA (KRP1)	XP_718839.1	CAALFM_C106600WA	31|19	50	25	2	31|19	0	0	0	0	0	-60.74	1	0.37		31|19	50	25	347
CAALFM_C101070CA (KRP1)	XP_714986.1	RPC40	27|27	54	27	2	25|17	0	0	0	0	0	-34.98	1.29	0.37		27|27	54	27	369
CAALFM_C101070CA (KRP1)	XP_714823.1	RPL11	23|21	44	22	2	17|20	0	0	0	0	0	-34.78	1.19	0.37		23|21	44	22	166
CAALFM_C101070CA (KRP1)	XP_713714.1	SSA2	91|94	185	92.5	2	45|53	0	0	0	0	0	-43.29	1.89	0.37		91|94	185	92.5	645
CAALFM_C101070CA (KRP1)	XP_712849.1	RFC1	29|26	55	27.5	2	15|28	0	0	0	0	0	-37.73	1.28	0.37		29|26	55	27.5	688
CAALFM_C101070CA (KRP1)	XP_710816.1	CaO19.13272	32|34	66	33	2	26|26	0	0	0	0	0	-45.34	1.27	0.37		32|34	66	33	714
CAALFM_C101070CA (KRP1)	XP_722611.1	UTP22	47|53	100	50	2	33|41	0	0	0	0	0	-62.45	1.35	0.38		47|53	100	50	1175
CAALFM_C101070CA (KRP1)	XP_721772.1	RPS7A	61|61	122	61	2	45|33	0	0	0	0	0	-51.12	1.56	0.38		61|61	122	61	186
CAALFM_C101070CA (KRP1)	XP_717808.1	UTP8	33|30	63	31.5	2	29|26	0	0	0	0	0	-53.44	1.15	0.38		33|30	63	31.5	720
CAALFM_C101070CA (KRP1)	XP_717465.1	CaO19.8143	59|49	108	54	2	35|43	0	0	0	0	0	-66.59	1.38	0.38		59|49	108	54	1042
CAALFM_C101070CA (KRP1)	XP_713680.1	FPR3	27|24	51	25.5	2	23|29	0	0	0	0	0	-56.87	0.98	0.38		27|24	51	25.5	428
CAALFM_C101070CA (KRP1)	XP_712835.1	CaO19.14166	33|40	73	36.5	2	38|22	0	0	0	0	0	-57.33	1.22	0.38		33|40	73	36.5	983
CAALFM_C101070CA (KRP1)	XP_710755.1	CBF5	122|105	227	113.5	2	72|46	0	0	0	0	0	-66.41	1.92	0.38		122|105	227	113.5	479
CAALFM_C101070CA (KRP1)	XP_710707.1	CaO19.170	31|28	59	29.5	2	33|21	0	0	0	0	0	-54.18	1.09	0.38		31|28	59	29.5	112
CAALFM_C101070CA (KRP1)	P00761	P00761	60|59	119	59.5	2	56|57	0	0	0	0	0	-113.58	1.05	0.39		60|59	119	59.5	231
CAALFM_C101070CA (KRP1)	XP_721500.1	RPS1	62|55	117	58.5	2	50|56	0	0	0	0	0	-107.04	1.1	0.39		62|55	117	58.5	256	RS3A_CANAL
CAALFM_C101070CA (KRP1)	XP_720354.1	RPA135	101|91	192	96	2	55|62	0	0	0	0	0	-75.53	1.64	0.39		101|91	192	96	1166
CAALFM_C101070CA (KRP1)	XP_718852.1	RPS22A	30|28	58	29	2	30|28	0	0	0	0	0	-61.61	1	0.39		30|28	58	29	130	RS22B_CANAL
CAALFM_C101070CA (KRP1)	XP_713982.1	CaO19.9855	24|29	53	26.5	2	34|23	0	0	0	0	0	-65.65	0.93	0.39		24|29	53	26.5	672
CAALFM_C101070CA (KRP1)	XP_712185.1	HMO1	43|42	85	42.5	2	33|51	0	0	0	0	0	-86.55	1.01	0.39		43|42	85	42.5	223
CAALFM_C101070CA (KRP1)	XP_710708.1	DBP2	168|155	323	161.5	2	120|65	0	0	0	0	0	-115.47	1.75	0.39		168|155	323	161.5	443	DBP2_CANAL
CAALFM_C101070CA (KRP1)	XP_719050.1	CAALFM_C100160CA	56|66	122	61	2	62|57	0	0	0	0	0	-128.56	1.03	0.39		56|66	122	61	400
CAALFM_C101070CA (KRP1)	XP_723554.1	DBP3	77|71	148	74	2	96|83	0	0	0	0	0	-214.28	0.83	0.4		77|71	148	74	564	DBP3_CANAL
CAALFM_C101070CA (KRP1)	XP_723578.1	RPA34	14|12	26	13	2	15|16	0	0	0	0	0	-37.52	0.84	0.4		14|12	26	13	240
CAALFM_C101070CA (KRP1)	XP_723074.1	EGD2	8|4	12	6	2	19|55	0	0	0	0	0	-145.55	0.16	0.4		8|4	12	6	178	NACA_CANAL
CAALFM_C101070CA (KRP1)	XP_722778.1	BFR1	63|41	104	52	2	108|150	0	0	0	0	0	-433.22	0.4	0.4		63|41	104	52	462
CAALFM_C101070CA (KRP1)	XP_722840.1	CaO19.12092	11|6	17	8.5	2	18|37	0	0	0	0	0	-98.6	0.31	0.4		11|6	17	8.5	385
CAALFM_C101070CA (KRP1)	XP_722620.1	CAALFM_C202540WA	105|103	208	104	2	70|103	0	0	0	0	0	-155.8	1.2	0.4		105|103	208	104	1722
CAALFM_C101070CA (KRP1)	XP_722073.1	CCT3	10|6	16	8	2	10|24	0	0	0	0	0	-54.5	0.47	0.4		10|6	16	8	529
CAALFM_C101070CA (KRP1)	XP_722111.1	CaO19.11525	5|0	5	2.5	2	4|9	0	0	0	0	0	-27.21	0.38	0.4		5|0	5	2.5	752
CAALFM_C101070CA (KRP1)	XP_721707.1	CAALFM_C302160CA	181|171	352	176	2	140|82	0	0	0	0	0	-154.24	1.59	0.4		181|171	352	176	732
CAALFM_C101070CA (KRP1)	XP_721723.1	CAALFM_C302020WA	4|4	8	4	2	3|8	0	0	0	0	0	-13.42	0.73	0.4		4|4	8	4	841	MRD1_CANAL
CAALFM_C101070CA (KRP1)	XP_721735.1	CAALFM_C301890CA	7|4	11	5.5	2	17|17	0	0	0	0	0	-60.37	0.32	0.4		7|4	11	5.5	345
CAALFM_C101070CA (KRP1)	XP_721764.1	CAALFM_C301560WA	18|17	35	17.5	2	15|27	0	0	0	0	0	-49.13	0.83	0.4		18|17	35	17.5	767
CAALFM_C101070CA (KRP1)	XP_721769.1	CAALFM_C301520CA	12|8	20	10	2	9|15	0	0	0	0	0	-31.12	0.83	0.4		12|8	20	10	353
CAALFM_C101070CA (KRP1)	XP_721430.1	CAALFM_C102430CA	9|0	9	4.5	2	9|63	0	0	0	0	0	-157.54	0.12	0.4		9|0	9	4.5	648
CAALFM_C101070CA (KRP1)	XP_721481.1	CDC73	10|3	13	6.5	2	19|27	0	0	0	0	0	-89.11	0.28	0.4		10|3	13	6.5	370
CAALFM_C101070CA (KRP1)	XP_721532.1	RLI1	11|0	11	5.5	2	18|53	0	0	0	0	0	-155.74	0.15	0.4		11|0	11	5.5	622
CAALFM_C101070CA (KRP1)	XP_721548.1	AGE1	2|0	2	1	2	2|7	0	0	0	0	0	-18.24	0.22	0.4		2|0	2	1	958
CAALFM_C101070CA (KRP1)	XP_721341.1	CAALFM_C702120CA	3|2	5	2.5	2	0|11	0	0	0	0	0	-16.44	0.45	0.4		3|2	5	2.5	153
CAALFM_C101070CA (KRP1)	XP_721345.1	CAALFM_C702100WA	5|0	5	2.5	2	3|21	0	0	0	0	0	-50.63	0.21	0.4		5|0	5	2.5	329
CAALFM_C101070CA (KRP1)	XP_721133.1	AMD1	34|16	50	25	2	42|81	0	0	0	0	0	-214.84	0.41	0.4		34|16	50	25	778
CAALFM_C101070CA (KRP1)	XP_720662.1	GCD11	77|47	124	62	2	73|89	0	0	0	0	0	-224.94	0.77	0.4		77|47	124	62	534
CAALFM_C101070CA (KRP1)	XP_720697.1	TIF5	9|5	14	7	2	29|36	0	0	0	0	0	-123.94	0.22	0.4		9|5	14	7	420
CAALFM_C101070CA (KRP1)	XP_720460.1	ZUO1	41|14	55	27.5	2	58|84	0	0	0	0	0	-261.57	0.39	0.4		41|14	55	27.5	427
CAALFM_C101070CA (KRP1)	XP_720470.1	CAALFM_C402780WA	5|4	9	4.5	2	12|23	0	0	0	0	0	-62	0.26	0.4		5|4	9	4.5	544
CAALFM_C101070CA (KRP1)	XP_720349.1	GUS1	23|4	27	13.5	2	43|91	0	0	0	0	0	-277.9	0.2	0.4		23|4	27	13.5	725
CAALFM_C101070CA (KRP1)	XP_720359.1	CAALFM_C700520WA	42|20	62	31	2	58|85	0	0	0	0	0	-246.73	0.43	0.4		42|20	62	31	1091
CAALFM_C101070CA (KRP1)	XP_720388.1	CAALFM_C700250CA	24|24	48	24	2	30|30	0	0	0	0	0	-71.43	0.8	0.4		24|24	48	24	187
CAALFM_C101070CA (KRP1)	XP_720406.1	CAALFM_C700070CA	12|4	16	8	2	18|36	0	0	0	0	0	-102.5	0.3	0.4		12|4	16	8	317
CAALFM_C101070CA (KRP1)	XP_720078.1	APL5	4|0	4	2	2	8|21	0	0	0	0	0	-62.24	0.14	0.4		4|0	4	2	1099
CAALFM_C101070CA (KRP1)	XP_719838.1	CAALFM_C307480WA	8|3	11	5.5	2	20|24	0	0	0	0	0	-84.83	0.25	0.4		8|3	11	5.5	446
CAALFM_C101070CA (KRP1)	XP_719590.1	KAR2	58|49	107	53.5	2	42|81	0	0	0	0	0	-145.71	0.87	0.4		58|49	107	53.5	687
CAALFM_C101070CA (KRP1)	XP_719308.1	CAALFM_CR09740WA	12|8	20	10	2	10|16	0	0	0	0	0	-34.99	0.77	0.4		12|8	20	10	399	RRP3_CANAL
CAALFM_C101070CA (KRP1)	XP_719314.1	CAALFM_CR09800CA	22|14	36	18	2	23|30	0	0	0	0	0	-76.19	0.68	0.4		22|14	36	18	872
CAALFM_C101070CA (KRP1)	XP_719331.1	SIK1	186|192	378	189	2	164|131	0	0	0	0	0	-252.78	1.28	0.4		186|192	378	189	516
CAALFM_C101070CA (KRP1)	XP_719395.1	DRS1	8|8	16	8	2	2|15	0	0	0	0	0	-17.38	0.94	0.4		8|8	16	8	613	DRS1_CANAL
CAALFM_C101070CA (KRP1)	XP_719411.1	CKA1	10|6	16	8	2	9|12	0	0	0	0	0	-29.15	0.76	0.4		10|6	16	8	416
CAALFM_C101070CA (KRP1)	XP_719423.1	CAALFM_CR10750CA	5|4	9	4.5	2	8|6	0	0	0	0	0	-19.33	0.64	0.4		5|4	9	4.5	134
CAALFM_C101070CA (KRP1)	XP_719198.1	SRP72	12|3	15	7.5	2	39|44	0	0	0	0	0	-170.37	0.18	0.4		12|3	15	7.5	635
CAALFM_C101070CA (KRP1)	XP_719058.1	CCT8	9|7	16	8	2	20|38	0	0	0	0	0	-102.23	0.28	0.4		9|7	16	8	540
CAALFM_C101070CA (KRP1)	XP_718803.1	SUI2	43|33	76	38	2	54|68	0	0	0	0	0	-174.07	0.62	0.4		43|33	76	38	300
CAALFM_C101070CA (KRP1)	XP_718825.1	NOP6	7|4	11	5.5	2	5|12	0	0	0	0	0	-24.84	0.65	0.4		7|4	11	5.5	209
CAALFM_C101070CA (KRP1)	XP_718643.1	MRPL6	7|8	15	7.5	2	13|16	0	0	0	0	0	-42.91	0.52	0.4		7|8	15	7.5	233
CAALFM_C101070CA (KRP1)	XP_718386.1	MBF1	4|2	6	3	2	12|16	0	0	0	0	0	-53.35	0.21	0.4		4|2	6	3	151
CAALFM_C101070CA (KRP1)	XP_718320.1	SEC65	4|0	4	2	2	5|19	0	0	0	0	0	-50.88	0.17	0.4		4|0	4	2	275
CAALFM_C101070CA (KRP1)	XP_717934.1	SRP54	2|0	2	1	2	16|24	0	0	0	0	0	-87.44	0.05	0.4		2|0	2	1	556
CAALFM_C101070CA (KRP1)	XP_717802.1	BUD21	7|5	12	6	2	4|13	0	0	0	0	0	-22.65	0.71	0.4		7|5	12	6	219
CAALFM_C101070CA (KRP1)	XP_717430.1	RRF1	11|3	14	7	2	13|28	0	0	0	0	0	-77.6	0.34	0.4		11|3	14	7	261
CAALFM_C101070CA (KRP1)	XP_717448.1	MSH1	3|0	3	1.5	2	0|9	0	0	0	0	0	-17.69	0.33	0.4		3|0	3	1.5	923
CAALFM_C101070CA (KRP1)	XP_717471.1	NCL1	7|0	7	3.5	2	10|49	0	0	0	0	0	-128.63	0.12	0.4		7|0	7	3.5	756
CAALFM_C101070CA (KRP1)	XP_717481.1	NHP2	8|12	20	10	2	12|31	0	0	0	0	0	-68.13	0.47	0.4		8|12	20	10	159
CAALFM_C101070CA (KRP1)	XP_717504.1	RAD27	5|0	5	2.5	2	5|18	0	0	0	0	0	-48.75	0.22	0.4		5|0	5	2.5	372
CAALFM_C101070CA (KRP1)	XP_717293.1	SSZ1	45|22	67	33.5	2	54|106	0	0	0	0	0	-276.63	0.42	0.4		45|22	67	33.5	540
CAALFM_C101070CA (KRP1)	XP_717311.1	CaO19.11312	10|13	23	11.5	2	16|15	0	0	0	0	0	-40.99	0.74	0.4		10|13	23	11.5	276
CAALFM_C101070CA (KRP1)	XP_717154.1	TIF11	10|6	16	8	2	14|11	0	0	0	0	0	-37.02	0.64	0.4		10|6	16	8	154
CAALFM_C101070CA (KRP1)	XP_716860.1	CaO19.8577	11|10	21	10.5	2	16|19	0	0	0	0	0	-48.73	0.6	0.4		11|10	21	10.5	177
CAALFM_C101070CA (KRP1)	XP_716876.1	BDF1	2|2	4	2	2	6|27	0	0	0	0	0	-63.04	0.12	0.4		2|2	4	2	732
CAALFM_C101070CA (KRP1)	XP_716878.1	CaO19.8595	4|0	4	2	2	5|20	0	0	0	0	0	-53.11	0.16	0.4		4|0	4	2	735
CAALFM_C101070CA (KRP1)	XP_716731.1	TIF3	2|3	5	2.5	2	10|13	0	0	0	0	0	-42.61	0.22	0.4		2|3	5	2.5	455
CAALFM_C101070CA (KRP1)	XP_716733.1	ANB1	19|15	34	17	2	28|103	0	0	0	0	0	-234.01	0.26	0.4		19|15	34	17	138	IF5A_CANAL
CAALFM_C101070CA (KRP1)	XP_716735.1	CAALFM_C601590WA	6|6	12	6	2	6|19	0	0	0	0	0	-36.2	0.48	0.4		6|6	12	6	493
CAALFM_C101070CA (KRP1)	XP_716633.1	DED1	247|232	479	239.5	2	185|135	0	0	0	0	0	-238.4	1.5	0.4		247|232	479	239.5	672	DED1_CANAL
CAALFM_C101070CA (KRP1)	XP_716208.1	SSB1	140|132	272	136	2	135|178	0	0	0	0	0	-361.14	0.87	0.4		140|132	272	136	613
CAALFM_C101070CA (KRP1)	XP_716024.1	KRE30	19|13	32	16	2	20|59	0	0	0	0	0	-130.05	0.41	0.4		19|13	32	16	609
CAALFM_C101070CA (KRP1)	XP_715587.1	CaO19.10393	2|0	2	1	2	0|23	0	0	0	0	0	-48.19	0.09	0.4		2|0	2	1	274
CAALFM_C101070CA (KRP1)	XP_715629.1	CaO19.10437	19|0	19	9.5	2	19|35	0	0	0	0	0	-118.25	0.35	0.4		19|0	19	9.5	184
CAALFM_C101070CA (KRP1)	XP_715505.1	CCT6	10|4	14	7	2	10|20	0	0	0	0	0	-51.43	0.47	0.4		10|4	14	7	559
CAALFM_C101070CA (KRP1)	XP_715517.1	NOP1	257|231	488	244	2	284|186	0	0	0	0	0	-491.81	1.04	0.4		257|231	488	244	316
CAALFM_C101070CA (KRP1)	XP_715210.1	SUI3	79|58	137	68.5	2	86|82	0	0	0	0	0	-216.02	0.82	0.4		79|58	137	68.5	281
CAALFM_C101070CA (KRP1)	XP_715249.1	SLA2	2|2	4	2	2	20|25	0	0	0	0	0	-90.43	0.09	0.4		2|2	4	2	1063
CAALFM_C101070CA (KRP1)	XP_715038.1	NPL3	391|288	679	339.5	2	446|361	0	0	0	0	0	#NAME?	0.84	0.4		391|288	679	339.5	286
CAALFM_C101070CA (KRP1)	XP_714952.1	CKA2	3|0	3	1.5	2	5|6	0	0	0	0	0	-23	0.27	0.4		3|0	3	1.5	329
CAALFM_C101070CA (KRP1)	XP_714876.1	RPA12	9|8	17	8.5	2	0|18	0	0	0	0	0	-18.79	0.94	0.4		9|8	17	8.5	123
CAALFM_C101070CA (KRP1)	XP_714877.1	CCT5	7|0	7	3.5	2	16|31	0	0	0	0	0	-102.59	0.15	0.4		7|0	7	3.5	548
CAALFM_C101070CA (KRP1)	XP_714733.1	NAT1	9|3	12	6	2	16|43	0	0	0	0	0	-116.42	0.2	0.4		9|3	12	6	782
CAALFM_C101070CA (KRP1)	XP_714755.1	CCT7	4|5	9	4.5	2	5|16	0	0	0	0	0	-32.55	0.43	0.4		4|5	9	4.5	549
CAALFM_C101070CA (KRP1)	XP_714506.1	PAF1	5|0	5	2.5	2	23|30	0	0	0	0	0	-116.69	0.09	0.4		5|0	5	2.5	467
CAALFM_C101070CA (KRP1)	XP_714401.1	SET2	7|10	17	8.5	2	15|10	0	0	0	0	0	-35.02	0.68	0.4		7|10	17	8.5	844	SET2_CANAL
CAALFM_C101070CA (KRP1)	XP_714415.1	CYC1	13|9	22	11	2	15|29	0	0	0	0	0	-68.16	0.5	0.4		13|9	22	11	110	CYC_CANAL
CAALFM_C101070CA (KRP1)	XP_714316.1	CAALFM_C601040CA	5|5	10	5	2	6|7	0	0	0	0	0	-15.75	0.77	0.4		5|5	10	5	831
CAALFM_C101070CA (KRP1)	XP_714208.1	CAALFM_C500780CA	5|0	5	2.5	2	5|8	0	0	0	0	0	-27.41	0.38	0.4		5|0	5	2.5	395
CAALFM_C101070CA (KRP1)	XP_713293.1	DPS1	15|0	15	7.5	2	23|68	0	0	0	0	0	-200.48	0.16	0.4		15|0	15	7.5	578
CAALFM_C101070CA (KRP1)	XP_713308.1	ARC1	8|0	8	4	2	24|51	0	0	0	0	0	-165	0.11	0.4		8|0	8	4	369
CAALFM_C101070CA (KRP1)	XP_713053.1	EGD1	10|0	10	5	2	12|38	0	0	0	0	0	-108.77	0.2	0.4		10|0	10	5	157
CAALFM_C101070CA (KRP1)	XP_713063.1	GAR1	21|22	43	21.5	2	33|23	0	0	0	0	0	-68.81	0.77	0.4		21|22	43	21.5	196
CAALFM_C101070CA (KRP1)	XP_712954.1	CAALFM_C101940CA	4|0	4	2	2	4|8	0	0	0	0	0	-25.13	0.33	0.4		4|0	4	2	168
CAALFM_C101070CA (KRP1)	XP_712958.1	CAALFM_C101900CA	11|4	15	7.5	2	21|32	0	0	0	0	0	-100.83	0.28	0.4		11|4	15	7.5	505
CAALFM_C101070CA (KRP1)	XP_712844.1	CaO19.14175	13|9	22	11	2	19|25	0	0	0	0	0	-68.8	0.5	0.4		13|9	22	11	416
CAALFM_C101070CA (KRP1)	XP_712768.1	CaO19.11640	12|6	18	9	2	16|36	0	0	0	0	0	-92.11	0.35	0.4		12|6	18	9	244
CAALFM_C101070CA (KRP1)	XP_712585.1	CAALFM_C209040WA	10|4	14	7	2	10|22	0	0	0	0	0	-55.49	0.44	0.4		10|4	14	7	193
CAALFM_C101070CA (KRP1)	XP_712533.1	LSG1	5|4	9	4.5	2	8|14	0	0	0	0	0	-35.18	0.41	0.4		5|4	9	4.5	684
CAALFM_C101070CA (KRP1)	XP_712550.1	CaO19.10985	3|0	3	1.5	2	2|12	0	0	0	0	0	-28.71	0.21	0.4		3|0	3	1.5	555
CAALFM_C101070CA (KRP1)	XP_712316.1	NOP5	147|151	298	149	2	140|93	0	0	0	0	0	-199.46	1.28	0.4		147|151	298	149	516	NOP58_CANAL
CAALFM_C101070CA (KRP1)	XP_712054.1	CAM1	6|10	16	8	2	3|24	0	0	0	0	0	-39.76	0.59	0.4		6|10	16	8	419
CAALFM_C101070CA (KRP1)	XP_711973.1	CAALFM_C104040CA	5|3	8	4	2	5|16	0	0	0	0	0	-34.94	0.38	0.4		5|3	8	4	525	NOP9_CANAL
CAALFM_C101070CA (KRP1)	XP_711902.1	GCV2	2|0	2	1	2	9|50	0	0	0	0	0	-128.58	0.03	0.4		2|0	2	1	999
CAALFM_C101070CA (KRP1)	XP_711912.1	ENO1	23|25	48	24	2	3137|2643	0	0	0	0	0	#NAME?	0.01	0.4		23|25	48	24	440
CAALFM_C101070CA (KRP1)	XP_711918.1	TCP1	19|6	25	12.5	2	31|57	0	0	0	0	0	-169.7	0.28	0.4		19|6	25	12.5	554
CAALFM_C101070CA (KRP1)	XP_711793.1	ECM32	3|6	9	4.5	2	5|14	0	0	0	0	0	-30.94	0.47	0.4		3|6	9	4.5	1105
CAALFM_C101070CA (KRP1)	XP_711631.1	RPG1	12|0	12	6	2	5|19	0	0	0	0	0	-50.88	0.5	0.4		12|0	12	6	930
CAALFM_C101070CA (KRP1)	XP_711456.1	MAK11	21|6	27	13.5	2	18|35	0	0	0	0	0	-94.43	0.51	0.4		21|6	27	13.5	491
CAALFM_C101070CA (KRP1)	XP_711404.1	CEF3	71|37	108	54	2	68|161	0	0	0	0	0	-381.97	0.47	0.4		71|37	108	54	1050
CAALFM_C101070CA (KRP1)	XP_711371.1	PGK1	32|8	40	20	2	27|87	0	0	0	0	0	-218.94	0.35	0.4		32|8	40	20	417
CAALFM_C101070CA (KRP1)	XP_710862.1	CAALFM_C104970WA	86|34	120	60	2	117|187	0	0	0	0	0	-549.15	0.39	0.4		86|34	120	60	1363	CLU_CANAL
CAALFM_C101070CA (KRP1)	XP_710842.1	RPL23A	24|26	50	25	2	39|29	0	0	0	0	0	-86.32	0.74	0.4		24|26	50	25	115
CAALFM_C101070CA (KRP1)	XP_710527.1	CAALFM_C500030WA	4|5	9	4.5	2	4|9	0	0	0	0	0	-17.24	0.69	0.4		4|5	9	4.5	269
CAALFM_C101070CA (KRP1)	XP_717619.1	FUN12	92|75	167	83.5	2	104|103	0	0	0	0	0	-259.94	0.81	0.4		92|75	167	83.5	1017
CAALFM_C101070CA (KRP1)	XP_717655.1	TEF3	161|164	325	162.5	2	132|239	0	0	0	0	0	-420.15	0.88	0.4		161|164	325	162.5	458
CAALFM_C101070CA (KRP1)	XP_714579.1	CAALFM_C502070CA	3|0	3	1.5	2	0|7	0	0	0	0	0	-13.47	0.43	0.4		3|0	3	1.5	328	ESF2_CANAL
CAALFM_C101070CA (KRP1)	XP_712788.1	YAP180	5|0	5	2.5	2	10|13	0	0	0	0	0	-49.62	0.22	0.4		5|0	5	2.5	676
CAALFM_C101070CA (KRP1)	XP_712681.1	GAG1	21|19	40	20	2	20|22	0	0	0	0	0	-46.51	0.95	0.4		21|19	40	20	324
CAALFM_C101070CA (KRP1)	XP_711590.1	DOT4	3|3	6	3	2	5|7	0	0	0	0	0	-17.35	0.5	0.4		3|3	6	3	735
CAALFM_C101070CA (KRP1)	XP_711142.1	GLC7	8|8	16	8	2	11|16	0	0	0	0	0	-36.99	0.59	0.4		8|8	16	8	330
CAALFM_C101070CA (KRP1)	XP_710761.1	RPA190	122|117	239	119.5	2	78|100	0	0	0	0	0	-146	1.34	0.4		122|117	239	119.5	1665
CAALFM_C101070CA (KRP1)	XP_710591.1	UTP30	7|4	11	5.5	2	5|18	0	0	0	0	0	-36.52	0.48	0.4		7|4	11	5.5	369
CAALFM_C101070CA (KRP1)	XP_888889.1	CaJ7_0319	8|5	13	6.5	2	16|34	0	0	0	0	0	-90.79	0.26	0.4		8|5	13	6.5	1038
CAALFM_C101070CA (KRP1)	GFP_AEQVI	GFP_AEQVI	8|0	8	4	2	73|62	0	0	0	0	0	-300.72	0.06	0.4		8|0	8	4	238	GFP_AEQVI
CAALFM_C101070CA (KRP1)	XP_713449.1	CaO19.11208	5|3	8	4	2	6|5	0	0	0	0	0	-15.44	0.73	0.4		5|3	8	4	269
CAALFM_C101070CA (KRP1)	XP_712188.1	CaO19.13969	2|0	2	1	2	5|11	0	0	0	0	0	-33.73	0.12	0.4		2|0	2	1	759
CAALFM_C101070CA (KRP1)	XP_710381.1	SLB2	8|7	15	7.5	2	11|26	0	0	0	0	0	-58.32	0.41	0.4		8|7	15	7.5	317
CAALFM_C101070CA (KRP1)	XP_709962.1	CAALFM_C403560WA	2|0	2	1	2	4|5	0	0	0	0	0	-18.6	0.22	0.4		2|0	2	1	771
CAALFM_C101070CA (KRP1)	XP_712243.1	CAALFM_C104620WA	2|0	2	1	2	0|6	0	0	0	0	0	-11.21	0.33	0.4		2|0	2	1	576
CAALFM_C101070CA (KRP1)	XP_722328.1	DIM1	3|0	3	1.5	2	0|11	0	0	0	0	0	-21.97	0.27	0.4		3|0	3	1.5	326
CAALFM_C101070CA (KRP1)	XP_722029.1	CaO19.11442	2|0	2	1	2	11|17	0	0	0	0	0	-60.73	0.07	0.4		2|0	2	1	474
CAALFM_C101070CA (KRP1)	XP_723479.1	CAALFM_C109330WA	2|0	2	1	2	2|9	0	0	0	0	0	-22.41	0.18	0.4		2|0	2	1	199
CAALFM_C101070CA (KRP1)	XP_711394.1	CaO19.11619	3|3	6	3	2	7|11	0	0	0	0	0	-29.44	0.33	0.4		3|3	6	3	142
CAALFM_C101070CA (KRP1)	XP_710579.1	CaO19.8806	2|0	2	1	2	2|23	0	0	0	0	0	-52.78	0.08	0.4		2|0	2	1	1489
CAALFM_C101070CA (KRP1)	XP_721779.1	CAALFM_C301430WA	0|3	3	1.5	2	4|7	0	0	0	0	0	-23	0.27	0.4		0|3	3	1.5	219	RRT14_CANAL
CAALFM_C101070CA (KRP1)	XP_719673.1	CKB1	0|2	2	1	2	2|4	0	0	0	0	0	-12	0.33	0.4		0|2	2	1	293
CAALFM_C101070CA (KRP1)	XP_714709.1	CaO19.10670	0|4	4	2	2	9|0	0	0	0	0	0	-17.69	0.44	0.4		0|4	4	2	320
CAALFM_C101070CA (KRP1)	XP_711974.1	CaO19.4480	0|2	2	1	2	0|5	0	0	0	0	0	-9.34	0.4	0.4		0|2	2	1	204
CAALFM_C101070CA (KRP1)	XP_711356.1	CEF3	0|37	37	18.5	2	68|160	0	0	0	0	0	-508.01	0.16	0.4		0|37	37	18.5	1050	EF3_CANAL

## Sheet: Explanation of data file
Comparison view table (on next sheet)
Link to comparison view table:			https://prohits-web.lunenfeld.ca/prohits_report/CassandraWong_50_1bgi79i9tgsfik40ts5ssmltm5_0N_1612291999.html
Results on comparison view table are shown as total spectral counts. Results are already filtered based on iProphet >=0.95 and unique peptides >=2. iProphet cut-off is to ensure high probability of MS2 fragmentation pattern being correctly assigned to both peptide and protein. Unique peptides cut-off is to ensure we are actually seeing the protein in question.
A link to the comparison view table has been provided in the email and an Excel table is provided on the next sheet.
SAINT Analysis output (on sheet "SAINTID 5210")
The SAINT analysis tool is used to identify high-confidence protein interactors versus control samples. Prior to applying SAINT, proteins were filtered based on iProphet >=0.95 and unique peptides >=2. iProphet cut-off is to ensure high probability of MS2 fragmentation pattern being correctly assigned to both peptide and protein. Unique peptides cut-off is to ensure we are actually seeing the pro…
Key columns of interest in SAINT output:
Column A (Bait) = your tagged protein
Column C (PreyGene) = prey or protein that was identified in your Bait experiment.
Column D(Spec) = total spectral counts in your 2 Bioreplicates for your preygene, separated by a delimiter ( | ).
Column H(ctrlCounts) = total spectral counts in your Ctrl samples, samples separated by a delimiter.
Column P (BFDR). If your preygene has a BFDR of 0.01 or less, this is our cut-off for a high-confidence protein interactor. I would sort this SAINT document by BFDR, smallest to largest.
If other columns are of interest, please read SAINTexpress literature as provided on the previous sheet.
Spectral Counts
This is the number of times a peptide of a particular protein is selected for MS2 fragmentation and is correctly identified by our search engines.
