# Supplementary material for: Leveraging machine learning essentiality predictions and chemogenomic interactions to identify antifungal targets
Source: Nat Commun. 2021 Nov 11;12:6497. doi: 10.1038/s41467-021-26850-3 (PMC8586148; doi:10.1038/s41467-021-26850-3)
Supplement: Supplementary file 9 — Supplementary Data 7 [file 41467_2021_26850_MOESM9_ESM.xlsx]

## Sheet: HET Primers
Supplementary Table 4: Primers used in this study.
HET registry	Feature Name	Primer 5	Primer 6	Primer 7	Notes
HELC0178	C1_08100W_A	TCATCATTTCTTCCAAAACAATAAAAGTTTTCATTCCCCAATTAAAATAAAAAAAAGAACCCACTAAATCcgtacgctgcaggtcgac	AATATACAGGATACACTAGTGTACTAAGGATACAACTATATCATAATTTGAAACATCAGCAAAAGCTCAAatcgatgaattcgagctcg	GGAATGGCATTATCACGAAG	No barcode
HELC0182	C1_05350W_A	AAAAAAAGCGAGTAAGAAAACTGATACAGTGTTAATTTGCATTAGAATCAAATAGTGCTATTAAATCACAcgtacgctgcaggtcgac	CTGGAGACAAAAAGGTTTAGATTTGTAATGATGATAAAGGTATCATGCTATTGATTTCTATATAACGAATatcgatgaattcgagctcg	CATGACAGTGGAGAGCAATG	No barcode
HELC0183	C1_11190W_A	TCAGATACTGTGTTCCATTCCATTCAATTTGCTGCTAACCGATATTCGTACCTTATAATTTGCATTTTAAcgtacgctgcaggtcgac	AACGTAAAAACTATTTTCGAAAGTATCGTAAATGTGTTAATTGCGATTCTATTGTATTTAATCTCTATTTatcgatgaattcgagctcg	GGTAAGCGAACGGAACAGTC	No barcode
HELC0260	C2_06150C_A	ACCCTATCCCTAAAACGTACAGTATTATATTAAAGAAACAAAAGATGTCCACGAGGTCTCTAGACCTTGCACATGCTTGCGCGTACGCTGCAGGTCGAC	CGAATATAGTATTATTTTTATTATGCTTCATATTCTATACAGCCGGTGTCGGTCTCGTAGAGACTTCGATCATGCTCTTGATCGATGAATTCGAGCTCG	CACAAACGAGAGGCTCTATG
HELC0269	CR_03290C_A	TCTTTAACAGGGTTGGGTTCAGTTGTTACGGTCAACTACACCAGATGTCCACGAGGTCTCTAATGCTGTGCAAGTTGAGCCCGTACGCTGCAGGTCGAC	ATACTGACGGGAAACACAAGGACTACTAAAAACCTAGTTACTTCGGTGTCGGTCTCGTAGAATGCTGTGCAAGTTGAGCCATCGATGAATTCGAGCTCG	GTGGATGATTATCTCAAATG
HELC0270	C2_01110C_A	TTGTCGCAGTTACAGAAAGAAATAATTTCCAAAAACCCGCAAGGATGTCCACGAGGTCTCTAGCCACTACTAAGTCAGCTCCGTACGCTGCAGGTCGAC	ACATAAAACAATATAAGATAATAAACAACTACTTATTGTACACCGGTGTCGGTCTCGTAGAGATGAACCAACCCGGTGCAATCGATGAATTCGAGCTCG	TGTAGAAGCCAAGTTTGC
HELC0271	C3_02260C_A	TTCCCATCATATTCATCAACAACAACAACAACAATATCCCCCAGATGTCCACGAGGTCTCTACGTAGTCGCAGGTTTGATCGTACGCTGCAGGTCGAC	TTTTTTGAATCGAACCACTTTTTTCGTTTCTGATCAGACTTAACGGTGTCGGTCTCGTAGACGCGCTATTGATATGTCGTATCGATGAATTCGAGCTCG	CATATATCATGAACAAGAAC
HELC0295	C2_08270C_A	CCAGCAGTGATAAATTAACTTCTATCTATTCCCATTCCCATTCGATGTCCACGAGGTCTCTCTAGGGTTTGGAACATCATGCGTACGCTGCAGGTCGAC	TTGATAACCAAGCTTATTATTATTTCTAGGTGATGATAATGAACGGTGTCGGTCTCGTAGGTCCAACATCATGCCAATAATCGATGAATTCGAGCTCG	CTTGTATAACTAGACATATC
HELC0306	C2_07130C_A	TCTCAAAGCTTTTATTCGACATGGGAAGCAAGCCAATGATATGGATGTCCACGAGGTCTCTTATGCCGACTCATTACCGGGCGTACGCTGCAGGTCGAC	AAATACGTATATTTTCTTTTTTTCTTACTCTTTTCTTTTACTACGGTGTCGGTCTCGTAGAGGGCAATCGTAGGTCACTTATCGATGAATTCGAGCTCG	CTTGTTAATGGCCTTTCTCTG
HELC0325	C6_00160W_A	TCCTTTTTTACAAGATCACACCATACTTTTTATCACCCAAGTCGATGTCCACGAGGTCTCTGTCAGTTACACAGATTGCGCGTACGCTGCAGGTCGAC	AGGAGAATATAAAGAATGCGTATATATTATTGTATAGGAGAATCGGTGTCGGTCTCGTAGCGATAAGCTCGCTGTCACGTATCGATGAATTCGAGCTCG	GACCAGGAGATTGGGGTGGAG
HELC0327	CR_08510W_A	CACTGTAGACTAGGTTTATAACACACCATCATAATCATTCGCTGATGTCCACGAGGTCTCTGGCGACGTGTTTCCAATTATCGTACGCTGCAGGTCGAC	GTTGTTGAGGCATAACTCTTAGATTGATAATGCCAACAATATCCGGTGTCGGTCTCGTAGCGGCTATAACTAACATGACCATCGATGAATTCGAGCTCG	GTAATAATCTCTACCGAACTC
HELC0553	C2_07750W_A	CACAACCAAACAATAAAGTCATATAGATAATACAAAGCTACAAATCCTCCTCCCCCCCCTAAACAGATAACGTACGCTGCAGGTCGAC	GAATTAAATCAACAAACTAATAATGACTATTATAATATAGTGAAGTAAATACAAGATGGAATAGCTTAATATCGATGAATTCGAGCTCG	TGCTTTCTTTACGGGAACATTT	No barcode
HELC0554	C5_04900C_A	AAAAAAAAAAACAGAGTAAGCAAATACAAATACCCTTTCACAACATCAACAACACCTTTTAATACAAACAcgtacgctgcaggtcgac	TAATTACTATATTCAATATTTTTCTATTCTATAAATCCAAAATCACCCGACCCCCCCCCCCCCCAAAACAatcgatgaattcgagctcg	ACTTCTTGGCCTTCATTGTC	No barcode
HELC0557	C7_02300W_A	AACTATTTCATCCCCCCAAAACAATAAGATTAATCACATAATGgatgtccacgaggtctctGGACCCTCACGAAGGCGTATcgtacgctgcaggtcgac	GGTGTTAAGTCTATAGATTCTAAAAATTTGGCATACTTATCATcggtgtcggtctcgtagTTGTTAGATGCCTTTGTCATatcgatgaattcgagctcg	AACCGTGGCTCAAGTAATTACA
HELC0559	C1_05070C_A	ACTTGTTTCCTAACCCCTTCTAACAACTTCACCTTAGTCAATGgatgtccacgaggtctctTGCGGAATATACGTGCTCACcgtacgctgcaggtcgac	TTTTATTTCTATACAACGTTTATAGTAATATATTTGTCTTTAAcggtgtcggtctcgtagGGAGAAATGCGTTGAACAGAatcgatgaattcgagctcg	TGAGGACGACGATGAAGAACTC
HELC0560	C4_04050C_A	ATAACAAAAAAACAAATTAGTTATACCCATCAAATCAAACATGgatgtccacgaggtctctGTCCGTTGTCGCAGGGTGAGcgtacgctgcaggtcgac	GTCCGCAACGGATACATAATTAGTCTTGCTCTTGCTTTATTACcggtgtcggtctcgtagCCCGCCTGGTCCGCGATAGTatcgatgaattcgagctcg	TCAAATTCTGACCGTTGTTGCC
HELC0562	C4_03520C_A	CAAATCTCGTATTAGTCATTCGCTTTAATTTTTATCAACTATGgatgtccacgaggtctctGCGTACGTAGGAAACGTGGCcgtacgctgcaggtcgac	AAACAGAAAAAGAAAAAGATATAGTATCAGTAACTAGAATTAGcggtgtcggtctcgtagCCCTACTGTCCATCAAATCAatcgatgaattcgagctcg	GAAACGTTCAAAGCGGTAAAAT
HELC0563	CR_04900C_A	CAATCTCTTTACTTTTTACTTCAAAAAATTTTTTTACCCAATGgatgtccacgaggtctctAGAAGAGTTGTGACCGTCGTcgtacgctgcaggtcgac	GCATTTAAGCAAAACCTTTAGCTTTGTGCATTACTGATTCTAAcggtgtcggtctcgtagGCTGATGTCAGAGCACGGTGatcgatgaattcgagctcg	GCAAGACCAATTTAATCACCACCA
HELC0564	C2_03720W_A	CAGTATTAAAGATCAACAAAGTAACAATTTTATATAAAAAATGgatgtccacgaggtctctATGGCGACAGTAGTCCTACTcgtacgctgcaggtcgac	CCCACAAATTAGTATTGTAGAACAGTTCACACTAATTTCTCACcggtgtcggtctcgtagCACGTTGGGAAGTGACTGCCatcgatgaattcgagctcg	ATTCTTCAGTCTGACGCTCTCC
HELC0566	CR_02750C_A	CCCAACAACAACCCCACTCCCCAAAATAAATTTATAAGAAATGgatgtccacgaggtctctGCGCGCGCGACGACTTATCGcgtacgctgcaggtcgac	AAAGCAAAAAAAAAAAAAAAGTATAAAAACTCTTTCCTTTTATcggtgtcggtctcgtagCGTTAGCAGCTACGACATTCatcgatgaattcgagctcg	ACGAATGGAAATACAACGGATGA
HELC0567	C2_00080C_A	CGGACTGTGATAGTTGAGGGTGGGTGTTGGCACCACAGCAATGgatgtccacgaggtctctCAGGGCCTTCCAGCCGCGGTcgtacgctgcaggtcgac	CATTTATTTTTTTTTTCTATAAATCAGATCTGGGTATACTTAGcggtgtcggtctcgtagTTGCTGTAGGTTAACCCGTAatcgatgaattcgagctcg	CCGGTATAACACTCCCCAACAA
HELC0568	C5_00410W_A	CTGCAAAAACTACAACCAGACAACAACAACACTAAACAAAATGgatgtccacgaggtctctTATAGCGTATAGGTGGGCGTcgtacgctgcaggtcgac	ATTTAACTATTAAACGAATATGTAAAAACTTAATTAGAATCACcggtgtcggtctcgtagGAGGATTAATCAGGTGAGGTatcgatgaattcgagctcg	AAAATCGGCGGAAAGGAGTTTT
HELC0569	CR_02290W_A	CTTTATCACAATTCATTTGTTGTTAACTTATCAAAAAAACATGgatgtccacgaggtctctCGCTCACTGCCTGACATGCGcgtacgctgcaggtcgac	CAATTAAAAAAAAATAAGCCATTAATAAAATTCAAACAACTATcggtgtcggtctcgtagTAACACTCGGTACGACAACAatcgatgaattcgagctcg	TTATTGGAAAAGAGGCACCCGA
HELC0571	C2_09130C_A	GTGACAAATATAACAAAGAAAGAAGAAAATATAATTGAAGATGgatgtccacgaggtctctTCGTGATGAGACTAGGCCTTcgtacgctgcaggtcgac	GTGAAATAAGAAATATTATAAGTCCATGATATATTCTTCTTACcggtgtcggtctcgtagTCTTGTTTATCGAGAAGGTGatcgatgaattcgagctcg	TTGCGTTAACTATATGGTACGT
HELC0572	CR_10480W_A	GTTCCGTCCATTTGTTTATTGAGTCGTACATTTTCAAAAGATGgatgtccacgaggtctctGTAGTGGATCTGATAACAGAcgtacgctgcaggtcgac	ATGTTGAAAACCTAGTCAGCCAGCTGTATCCTCCCCATTTTATcggtgtcggtctcgtagGTCGTTCGTCGCAGGACAGCatcgatgaattcgagctcg	AACATAGTCAAGAGCAGGCCAA
HELC0573	C4_01350W_A	TACACATACACGTACACATACACAAACATATATTCATATAATGgatgtccacgaggtctctAAGCTAAGACAGCTCCTCCAcgtacgctgcaggtcgac	TGTTCTTTGAATAAAGGGTTTCTTTTTCCCCTATTATCATCACcggtgtcggtctcgtagATCAGCGCCTTGGTAATGAGatcgatgaattcgagctcg	ACCAAATCAACACCTACACCATG
HELC0574	C7_03290C_A	TATCAACAACAATTAACAACAGCTGTTTTCAAAAACAAAAATGgatgtccacgaggtctctGTGCGAGTGGTAGCTCGAGTcgtacgctgcaggtcgac	AACCAAATAAATACTGCTTGGACAGCATTTACTTTAAAATTAAcggtgtcggtctcgtagCACCCGTACCGAATACGGATatcgatgaattcgagctcg	TGCTGTTGAGTCAAATACACCT
HELC0576	C4_01000C_A	TATTTCAATCTCATTCCATTAACTCATACAAAAATCAATAATGgatgtccacgaggtctctCATAACGTGGTCCTAATCTTcgtacgctgcaggtcgac	AAAAGTCATGCATCGTACCAATTCATTAAATTGTTAAAATTATcggtgtcggtctcgtagGAACTAAAGTGAATCCTGACatcgatgaattcgagctcg	AGAAGATGATGGGGATTCTGGT
HELC0577	C4_00120W_A	TCCTATTTTTTTTTTTCATCAGCTCCATATCCACACTAACATGgatgtccacgaggtctctCACGTGTTCATTCGACGATTcgtacgctgcaggtcgac	GGTCTTTATATTTTGGGCATAATAGAATATATAGAACGTTTATcggtgtcggtctcgtagTAAGGGTCTGAACAGGACATatcgatgaattcgagctcg	GGAGTAGCTGCACGTTTTGTTT
HELC0578	C4_00130W_A	TCTAATTCTTCACTAACTATCACTAATAACTAATACTACAATGgatgtccacgaggtctctAAGGTTTATTTCCTGTGATTcgtacgctgcaggtcgac	TATATTAGTTATGTATTATCAGCAATACTATAATTCAACTTAGcggtgtcggtctcgtagTATTTAGCTACGTCCATGTTatcgatgaattcgagctcg	ATGGGTTATGATTCCTGGCGTC
HELC0579	C1_03190C_A	TTATTGATTTATATAACTACTTCATATAAATTAGATTACAATGgatgtccacgaggtctctGACAGCTTAGCGTTCACGTAcgtacgctgcaggtcgac	TTAAGATTTTCTTCGTGGATACTTCTTTGTGTTGGTTCCTTAGcggtgtcggtctcgtagCCAGCACATGGTCTCACTGAatcgatgaattcgagctcg	TGAATTCCGTGGAGCATATCAA
HELC0580	C1_04190C_A	AACATAAATTCCCTATAGTTTCTTGGTGTTTAGACTATACATGgatgtccacgaggtctctACGTGAGAGTTGGTTTGCGAcgtacgctgcaggtcgac	TAGTAGTAGTAGTAGTATACTCTATTCTATTAAAACTTTCTAGcggtgtcggtctcgtagCTCGTCGCGTAAGCACACATatcgatgaattcgagctcg	GGTGAATTGGCTAAACATGCTGT
HELC0583	C7_03390C_A	AGATTATAAATTACTATCCTCATTCTCAATTTAACAGATCATGgatgtccacgaggtctctTCAAATTCATTAGTTTAGAAcgtacgctgcaggtcgac	TCAAATCATGTATTATCTGCTAACTTTATAACATATAAATCAAcggtgtcggtctcgtagAACCGCTGTACGGTGATTGCatcgatgaattcgagctcg	TGGGAGTTGAAGAAGAAACAAGC
HELC0586	C3_05560W_A	CAACAATTTCCTAACATCATCAAACATAGCATAATCAACAATGgatgtccacgaggtctctCGTGTGCGACGTCTCACTGGcgtacgctgcaggtcgac	CAGATTATCTTATTCTATCTACCGAATATAAAAGCATTTTTATcggtgtcggtctcgtagTTGTCCCACCGCCTACGTGAatcgatgaattcgagctcg	ACGCACTGATTTCTTTCAACGG
HELC0587	C3_02450W_A	CTACGCGTACACACTTTACACATATACATAACCAAGAAATATGgatgtccacgaggtctctGATCGGACTTCTAGTACCCAcgtacgctgcaggtcgac	GATATACTTTAAACTTGCAAAAAGAAAAATCTTTCGATTTTAAcggtgtcggtctcgtagCCGCTGCTACGGGCATTGGGatcgatgaattcgagctcg	CCAGCAAATTTGAAACCTTGGC
HELC0588	C4_06880C_A	GCAACCACTACTTAGTCAACATCAAATCAATAGTACCATAATGgatgtccacgaggtctctACTGGAGCTGTCTACATCCTcgtacgctgcaggtcgac	CCTTTTCCTGTTAAATAATCAACTAAGAAAGCATCTAAACTATcggtgtcggtctcgtagCGCTGTCGCGATGGACTTGTatcgatgaattcgagctcg	AGACCCTGCATTGTTGAGATCA
HELC0599	C2_10530C_A	AATTTTTCTTTCACACCACATCTTTTTCTTTCCCCCAGTGATGgatgtccacgaggtctctACTTCCAGCTACGAAGTTCTcgtacgctgcaggtcgac	AGTTCGATAGAAACTTGGTTAATTTTCAAAGGCTTATATTTATcggtgtcggtctcgtagTACAGGGTATCCGCAAAGGTatcgatgaattcgagctcg	ACACCATTTGAGAGACGGTTCA
HELC0600	C7_02220C_A	ACATCTCACCACCACCACCACTACTATCACTATCACCACAATGgatgtccacgaggtctctGCCGAGACGAGCAGACCTCCcgtacgctgcaggtcgac	GATTTTATAGATTGAATGATATAATATCTATAAATTCTATCATcggtgtcggtctcgtagTCAGCGCCTGGATTCCTTAAatcgatgaattcgagctcg	TCGATCAATAGCTACACAAACA
HELC0601	C2_07210C_A	ATCCAATTCGGACAGTAATTCCTTAAACTCAAACACATCAATGgatgtccacgaggtctctACTCAGGCCCGGATGATGTGcgtacgctgcaggtcgac	AGTCATTTATTCATTTATGAAAGTTCATCTCCTCTCAATTCAAcggtgtcggtctcgtagATGAACCTACGGCAGGCAGGatcgatgaattcgagctcg	TGTCAAGGGTATTGTTAGTGTGT
HELC0602	CR_06000W_A	CACTTTCTAATATAGCACAACACAGTTTACATATTAAAAGATGgatgtccacgaggtctctCACCAGATCAAAGTCCGGCTcgtacgctgcaggtcgac	TTTATTTTTTTTAATTGGTGGTGGTGGTATTATATTCTATCATcggtgtcggtctcgtagTAACCGTGTAACAGAGTATTatcgatgaattcgagctcg	CAGTTAACAAACCCTTCCAACCA
HELC0603	C2_06670C_A	CCCTTTTCACCATTTTTAGTTTCCATAAGATATATAAATCATGgatgtccacgaggtctctGGATGCATCTTAATATAAGGcgtacgctgcaggtcgac	CAACATCCTAAATTAATCAAACAAACACCATTTAATATACTAAcggtgtcggtctcgtagCCGGTGTACGATGTTATTGCatcgatgaattcgagctcg	AAGAAGAATAGTGGGGAGTGGG
HELC0604	C2_10700C_A	CGAATTTTTTCTTGCCTTTCTTTAACTATCTTCATCAACCATGgatgtccacgaggtctctTATTGCAACTGATGTACCGCcgtacgctgcaggtcgac	AGTAAGAGGTATTAATGAATTGCTTTGTATATTAAATAGTTAGcggtgtcggtctcgtagTGGCTAAACCACTGCCTATCatcgatgaattcgagctcg	GTGAGAAACCTGGTGATTGTGC
HELC0605	C1_14010W_A	GCCGCCAAGCGAAATCCATCATTTACACTATCAACAAGAAATGgatgtccacgaggtctctACTGCGCTCGGAGTATGTACcgtacgctgcaggtcgac	CCACAAAAAAATGTAAGACTTAATACTCCCACAAACTCCTCACcggtgtcggtctcgtagAAAGAACCGTGATTATTTCTatcgatgaattcgagctcg	TGGGCTATTTGTTGGAACCAGT
HELC0606	C3_03850C_A	TATATTTGCTTCTTTATTGTCTACAGTCATTTCCGTTGCAATGgatgtccacgaggtctctAGGATGCGCGGCACGAGAGAcgtacgctgcaggtcgac	TAAAATCCCTATAATATCAATACTTGACCAGTCAAGTACTTATcggtgtcggtctcgtagCGAGGAAATAGGTACGCTCCatcgatgaattcgagctcg	ATCCGCCATTCATAGCTCTGAG
HELC0607	C6_03920W_A	TATTATTCATTTTATTCTGGAATTCAACTTTTATTAGAAAATGgatgtccacgaggtctctTCACAAGGACCAGTAGGTAAcgtacgctgcaggtcgac	TCACCATCATGGACTTTATTGTACAAACGGACTATATATCTAAcggtgtcggtctcgtagAGTTGTTTGGCGTAATATGAatcgatgaattcgagctcg	CATTCCTAATTCCGCGCGTAC
HELC0608	C3_02100W_A	TCAGTGTATTTTATATTCATAGGAGAGATATACAGCTATCATGgatgtccacgaggtctctCCACTAGCGCAGGTCGGCTAcgtacgctgcaggtcgac	TTGTTAAACACTTGTATTATTATTTAAATGTATACGTTTCTACcggtgtcggtctcgtagTCGGCGTGACTAACGTACGAatcgatgaattcgagctcg	AACTTCACCACCAACAGCTCTT
HELC0609	C1_06360W_A	TGATTAATATTTATTATCAAATAATATAATAAAACTAACCATGgatgtccacgaggtctctTTGTTATAATCATAGGTAAAcgtacgctgcaggtcgac	AAAAAAAAAAAAAGCTTAGAAGTCTAGCAGTCTAATTGTTTATcggtgtcggtctcgtagTCTGAACTAACAAGACTGAGatcgatgaattcgagctcg	ACAGAACAAGAACAAGAACAGA
HELC0610	C1_10950C_A	TGGCAACCTCATCAGGAATCTAACGGACAGAATATCAATAATGgatgtccacgaggtctctCATCTTCAACAAATTAGTGGcgtacgctgcaggtcgac	TTCTTCAATGATAACTACCAGTACATTATTAATACACCTCTATcggtgtcggtctcgtagTACGATGCGCATGACTTGTAatcgatgaattcgagctcg	GTTTCCCCGGTCTTAACGTAGA
HELC0611	C3_02720W_A	TTTAGGAAACAACATAACAAAATATTCAGTGTCATCAATTATGgatgtccacgaggtctctCTACGAGAATTCCACACGATcgtacgctgcaggtcgac	TTTTTTTTTTCGTCATTCCTATTTCCATATATATATACACTATcggtgtcggtctcgtagACAATCGGTTAACCCGGTGAatcgatgaattcgagctcg	TTACCATCAAGTAAGCCTGCGT
HELC0612	C2_08860W_A	TTTCATTCCAATATAATAGTCATTACCTTACCAAACTATTATGgatgtccacgaggtctctCCGGACCATCACAGCAATCCcgtacgctgcaggtcgac	TATCACTTTTGATAAACTTTTTTGATCATTACACTTTCATCACcggtgtcggtctcgtagATTAGTCATCCTGCAGTGTTatcgatgaattcgagctcg	TCATTATTCGTGGCATTTCTTTCT
HELC0617	C4_03930C_A	AACATAAACAAAACTAAATCAATCTCACTTTTAAACCATCATGgatgtccacgaggtctctGATTGACCTTGGCTCGCCATcgtacgctgcaggtcgac	ACATTACTATTACTGTTATTGTTTGTATGACTTTTCTTTTTATcggtgtcggtctcgtagCGATAGTATACCGATAGCAGatcgatgaattcgagctcg	ACAACAACAACAACAACAACAACA
HELC0626	CR_06160C_A	ACAAATATATCCATCATAACTATAACTATAACTCAATATCATGgatgtccacgaggtctctCAAGGGCTACAATCTCTCGGcgtacgctgcaggtcgac	ATTAACCAAACCCTTGTTCAAAAAAATTCAGTTACTTAATCAAcggtgtcggtctcgtagAAGCAGCGTATGGTGCAGACatcgatgaattcgagctcg	AGTTCACACCGTATCAAGCCTT
HELC0629	CR_02700W_A	ACATCAACTTCTAAAGCATTATACTACTCTTTCCTTCACGATGgatgtccacgaggtctctCACCTGGGAAGAGAGAAATCcgtacgctgcaggtcgac	TATATGTATRTATATATATTACATAACCATTCACCCCAATCAAcggtgtcggtctcgtagGATCGCTGAACGCAGTAGTTatcgatgaattcgagctcg	TGCTAGTGGGGTGGTAATTGTC
HELC0910	C3_03520C_A	AGTACTACAAAACTATTATCAAAGCTAAACAAGACCATATACCGATGTCCACGAGGTCTCTCACCTATCAGGAGACGTGAGCGTACGCTGCAGGTCGAC	ACACTAAATCTAAACACTGGTAGTCCTATAAACATCAGTATATCGGTGTCGGTCTCGTAGGGCCTATTGTCAGTGCCCTTATCGATGAATTCGAGCTCG	TCAATTGACAATTGGTTGAC
HELC0919	CR_08090W_A	TCCCTTCAATTAACCTACACTTATACATAATCTTAATAAAATGgatgtccacgaggtctctCTGATAATGGTACTTCTCGGcgtacgctgcaggtcgac	ATATGGCGTAAAACAAATGACATTCAACATCTAGTTTACTTAAcggtgtcggtctcgtagACGGCCCGCGCGCGGACGTAatcgatgaattcgagctcg	ATGATGATGAAGACGTTGCCAC
HELC1098	C1_03220C_A	AATACCAGTATTACTCATCAAAAAAAGAACAAAAATTATAATGgatgtccacgaggtctctAGGACGTCTTCGCGCATTATcgtacgctgcaggtcgac	AATTCACACAAGAAATATAACTAAAACTTTACATACAATCTATcggtgtcggtctcgtagAGGGACTGTGTTGCCCGTATatcgatgaattcgagctcg	CCTCAAGCGCAGTTCTTTGAAT
HELC1467	C2_04290W_A	AGAAAGAAAGAAAAAATTTTGTCCAATTACTAACAAAAATATGgatgtccacgaggtctctCCCAAGGCCGACATAGGATAcgtacgctgcaggtcgac	GTCATCATCATCAATAAGTGGAACCAAAAAAAATAAATTCTATcggtgtcggtctcgtagGCCTGGTATGTCGGCGGCGCatcgatgaattcgagctcg	GGTTTGCAAGATGGTTTATTGTTCC
HELC1468	C4_02160C_A	TGTTTAGAATTTAAGTAACAATCCACATTGTTTATTACTGATAGATGTCCACGAGGTCTCTCCATGAGTCACAATGAGGCACGTACGCTGCAGGTCGAC	ACGGCAAACCCTGAGAACTGAGGCATTGTCCACTCCCAAGAGTCGGTGTCGGTCTCGTAGGGCCAGTATTTACATCCATGATCGATGAATTCGAGCTCG	GAAACTCCGCAAATCATTCG
HELC0299	C5_05100C_A	AAAGCAGAAGCGAACACGACTTTTTTTTTATTAACTTACCACCGATGTCCACGAGGTCTCTCTATGAAGGGAATGCACAGCCGTACGCTGCAGGTCGAC	AATTAGTTAATGCTAGGTCAATAGAAAACCCCTACCATATGCTCGGTGTCGGTCTCGTAGGTCAGACATCCATATTCAGCATCGATGAATTCGAGCTCG	GGGAAATTTCATCAAGTTCAGG
HELC0321	C2_07530C_A	TCAAATCATCTTTTTCTTTTTAGATTGTTTCTCCCACCTAACAGATGTCCACGAGGTCTCTGAGGCGACTTCATTGATACTCGTACGCTGCAGGTCGAC	TTTTTTTTCGCCTTAGGTTCTTCTCTTACTATGCGGTGGTGGTCGGTGTCGGTCTCGTAGTGTCCAACTAGCTCCAAGTAATCGATGAATTCGAGCTCG	CAAGGGTGTACTATGTTGCTG
HELC0338	C2_08980C_A	ATTCATTCGCTTAGAAATCAATTCCCAATAAAAACAAAAGGGATGTCCACGAGGTCTCTCCACTGGGTCACTGGTGCCATTCGTACGCTGCAGGTCGAC	ACAGTTTGACAATATTTGAAAACTTCTTCGCTAGCAACAACTTCGGTGTCGGTCTCGTAGTACCGGATTGTAATAGAGCGATCGATGAATTCGAGCTCG	CTTGTTTACTGACACAGCTAC
HELC1008	C3_04710W_A	CACAATCACTACCTATCATCATCATCACCATCCATTTTCAATGgatgtccacgaggtctctCATGCGCACCGGGAGCTCGGcgtacgctgcaggtcgac	ACGGAAACCACCTCAATATTTCAGTTCAGAATGGGACTATTAAcggtgtcggtctcgtagCCGGTTATTAAATCCAGCAGatcgatgaattcgagctcg	CACATGTGCTACTTTCTTGGCA
HELC1011	C3_05200W_A	TTCTCTTCTTCTTCACCACTTAATATAGCCAATAGACATAATGgatgtccacgaggtctctACTTCGGTCATGAGGGTCCGcgtacgctgcaggtcgac	CAAATTGTAGTCTGGTATATTAATTCTTGATTAAATAATTTATcggtgtcggtctcgtagGATCCAATGGCGAATGATGCatcgatgaattcgagctcg	AAGTTGCCTTATGACACACCAT
HELC330	C1_13290W_A	ATTTATATTAAATATTTTATTTTACCTGTCTCCCCAGTTCAACGATGTCCACGAGGTCTCTTAGCAGTCCTAAGCAGCCAGCGTACGCTGCAGGTCGAC	TAGTTTGTTAGTTTGTTAGTTTGTTAGTTAGTTGATTAATTGTCGGTGTCGGTCTCGTAGGCCCTGCCGAAACGTAAGAAATCGATGAATTCGAGCTCG	GTATTATTTGACTCCTGCGG
HELC336	C2_08430C_A	TTGCAAACCACAAACATTTGATACCAAACCATGTACAGTAGCTGATGTCCACGAGGTCTCTAGACATAGCCGAATGGAGCCCGTACGCTGCAGGTCGAC	ATATGTGTATGTGCATGTATGTGCATGTGTGTGTTATTGATTACGGTGTCGGTCTCGTAGGCTGGATATAAATCAGGCGAATCGATGAATTCGAGCTCG	GGATGTGTTTGCTGAAGATG
HELC1470	C1_00940W_A	CCCTACATCACCAAAATACTATAAATACACATTTCCAATAATGgatgtccacgaggtctctCAGTACCACGGTCAAAGAGAcgtacgctgcaggtcgac	TACATTTTCGCCACCACTAATCGTAACTATTTCAAATCACTAAcggtgtcggtctcgtagTAGCTCTAAGGAAGAGAAGAatcgatgaattcgagctcg	AGCTTAGAGACAACGCTACTTGA
HELC1474	C1_03030W_A	ATCTAACATCTTTTACTGAAAGCCAAGCATCAACACAATAATGgatgtccacgaggtctctTCCCGCATAACCCGGCAATAcgtacgctgcaggtcgac	TACAAATTTGTGATGAACAAAATATAATAAAAAACCTTCTTAAcggtgtcggtctcgtagTATACGCGTTGTCACCTGCCatcgatgaattcgagctcg	CCAAGTGCTGCCAAACCAATTA
HELC1475	C1_03110W_A	TTTCATTCAATAATACACCAACAATAATATAGAGTCAACAATGgatgtccacgaggtctctCTTCAGATTGCAGGAATGACcgtacgctgcaggtcgac	TATCATGAACATGTTTGCAAAATATTAATTTCACCTAAATTAAcggtgtcggtctcgtagCCTGGACCCATCCTCTGAAAatcgatgaattcgagctcg	AACCTGGGCTAGATTGATTGGG
HELC1477	C1_04610W_A	TTATATCCCTCCACCAATAAAAAGAAGAAATTATAGAAAAATGgatgtccacgaggtctctCGTTAACCACTATACACTGCcgtacgctgcaggtcgac	CAAATGCTAATTTAGAAACCCCAAATTCGGTCACAAAACTTAGcggtgtcggtctcgtagCACTTGCACGTAGTCTTGATatcgatgaattcgagctcg	TCGCCCTTTTAGTATTCAGCCT
HELC1479	C1_05720W_A	GTTCTCTTTTCCTCTAGTAATCAACCAACAAGTTCCAAAAATGgatgtccacgaggtctctGAGAACTCAGAGGTCAGCCGcgtacgctgcaggtcgac	AGTAGGTAGATAAGGTAAGTTTGAAATGATACATTAAACTTAGcggtgtcggtctcgtagTTTGTGGCCGCGACCGTGCTatcgatgaattcgagctcg	GACTTGGGTTTGATGTATGGCG
HELC1481	C1_06470W_A	TCTAGATTTTCTTTCTTCAGAATATCAAGTAACTTTAAAGATGgatgtccacgaggtctctTTCGGATGGTCTGAGTGCGCcgtacgctgcaggtcgac	TAAAACCAATATTTGTATATAAACGTTTGTAATGTGAGCTTAGcggtgtcggtctcgtagTGTAGTTATTGTCACATCTTatcgatgaattcgagctcg	CAAGGTTTCAAGGTGTCTGTGG
HELC1486	C1_10100C_A	TCATCAACCTTTAACTTTATCAATCAATTCATTTTCTATCATGgatgtccacgaggtctctTGAGGTTATTCAAGACGCCGcgtacgctgcaggtcgac	TTGAATCGCCTTTTTTAACGATTCTCTTCTCCAACTTCTCTAGcggtgtcggtctcgtagGACCCGCAGATCTTGGCTCTatcgatgaattcgagctcg	TGTTTGTGGACGAGCAGGAATA
HELC1487	C1_10390C_A	TCTTAGTTCACTAGTAACTTTCGAAGACAACATAGACAAGATGgatgtccacgaggtctctTACACTCTTCGTGCTCAGTCcgtacgctgcaggtcgac	TTCACTGTGAAAGATATCAATTCATTAAAAATAACACTATTAAcggtgtcggtctcgtagCCCTGATGACATTGAGAGGAatcgatgaattcgagctcg	TGGAGAAGTAGGCATGTGTAGA
HELC1488	C1_10870W_A	ATATTGAATAATAGTATAATATAGCAAATAATCAACAAAGATGgatgtccacgaggtctctAGCATGTCGAGGAGGTTAACcgtacgctgcaggtcgac	TTATGTATATGATCGTAATGAAAACTCAAACAATCCGATTTAGcggtgtcggtctcgtagCGAATGCTCGCGGCGTCGCAatcgatgaattcgagctcg	TCCAAATAGTAGTTACCGGGGT
HELC1491	C1_11060C_A	TTACTTGCAAAAGTTACTAGTACAAACCAATCACTAAACAATGgatgtccacgaggtctctCCAGTCAGAGAGCGTCATCGcgtacgctgcaggtcgac	CCTATGTAATTGTACAATGTTGTAAAGTAATTAAATAATTTATcggtgtcggtctcgtagTTGCTGTCAATGCCCTCTGCatcgatgaattcgagctcg	ATTGCTCAACTGAAATCGCTCG
HELC1492	C1_11360W_A	ACTTTCTTTCTTAAACCATCAAAAGTATAGATAATCAACAATGgatgtccacgaggtctctCGCTATTTGTTGCAAACAAAcgtacgctgcaggtcgac	ATAATGACTAATGCATGACCAATAACTTCAGTAATTAGTTTAAcggtgtcggtctcgtagCTTGTAATCGACTGTGTAGTatcgatgaattcgagctcg	TGAATGCAGAAGACCCACATGA
HELC1493	C1_12390C_A	TTTTATTGTATTAACATTTTAAGATATCAAGAAACTAAAAATGgatgtccacgaggtctctCAGGGACCAATCCGATGCACcgtacgctgcaggtcgac	ACCTATATTACAAACATTCAAATAAAGGTGGTTCCTTTCTTAAcggtgtcggtctcgtagAATTATTTGTGACTTCACCGatcgatgaattcgagctcg	ACTCATTCTTGGGCTTCAGTGT
HELC1494	C1_13050W_A	TCAGTTTTCAATACCCAGCAACTACATATAATAATCAAAGATGgatgtccacgaggtctctCGTCAAAGGACATTGGTACCcgtacgctgcaggtcgac	ATGCTTTCTTTGAATGATAAAAAAAAACACAAGTCAAATTTAAcggtgtcggtctcgtagTCGACTCAACGACCATCTAAatcgatgaattcgagctcg	GCCATTGTAGTTTCTACGCCAC
HELC1496	C1_14090W_A	TCTAGTATCCAATTTGAATACCGTCAACTGAATTATCAAAATGgatgtccacgaggtctctGGTAACATAGACCAGACTAAcgtacgctgcaggtcgac	ATATGCCAATATCTCTCAGATTCTTTTTTTTAGCTCAATCTAAcggtgtcggtctcgtagAAATCCAGCGAAGGTGATATatcgatgaattcgagctcg	TCAACAAGAGCAAGAACTACACG
HELC1498	C2_01610C_A	TAGCAACATTGAATACTAACAGCATTTACTTTAGTTAAACATGgatgtccacgaggtctctCTCTCTGAACGACTATGGTCcgtacgctgcaggtcgac	TTAATTAACAAATACTTACTATACAGTAATCAGCAAAACTTAGcggtgtcggtctcgtagACAAGTCTGCTTTGTCACAAatcgatgaattcgagctcg	CACTTTGTGGTTGTGTTGCCTA
HELC1501	C2_03960W_A	TAATCAACCATCAGTTAATATTAGATCAAGTATACAAAAAATGgatgtccacgaggtctctGCCTAGCTCCGGTGGACGTTcgtacgctgcaggtcgac	AATGTACAAGTTCACACAAAAAATGAAGAACAAATCTGTTTAAcggtgtcggtctcgtagTCGAAAGATGGAAGATGACCatcgatgaattcgagctcg	AAATTGTTGACGTGTGTGTGGG
HELC1502	C2_05410W_A	CAACCCTTTAGCATCCGTATAATAAAACACAGCATCCATAATGgatgtccacgaggtctctCTCCACAGCTACAAGCCGTCcgtacgctgcaggtcgac	AATAATGCTAACTCATATAAATATATTTTAGCAAATCATCTATcggtgtcggtctcgtagCACTATAAGGGTAGAAGAGAatcgatgaattcgagctcg	AGAGGGTAAATAGGTTTGACGA
HELC1503	C2_05610C_A	CATGGAACAAAGTTTACTAACAACATTGTTATAGGTAAAAATGgatgtccacgaggtctctAGGCAAGACCTATCTTCTCAcgtacgctgcaggtcgac	ATAATATACTACTATTATTCCTCACCTCAAATAGTTTGTTTATcggtgtcggtctcgtagGTTACCGATGAGGACTAAGAatcgatgaattcgagctcg	AAAGCGATGCCCACTAGTACTC
HELC1504	C2_05710C_A	TGTTCTTATATAACCATTTAAGATAACTAAACTATTAACAATGgatgtccacgaggtctctTTCCGTGGAAGCGTTAGGAGcgtacgctgcaggtcgac	ATTTTTTTTAAACTTCCCCTATATATGTAGACAACAAACTTAGcggtgtcggtctcgtagCTTAGGCAGTTACGATCCTTatcgatgaattcgagctcg	TGCTATCGGTGAAGTAAGTGCA
HELC1505	C2_06240W_A	CAGTACAATTGAATATAAATACATTACAATCACAGACATTATGgatgtccacgaggtctctCCGGTGCAGGTTCCGCTTCCcgtacgctgcaggtcgac	CTTTTTTATGTAATATTATAATACAAGTACTATTTAATTTTATcggtgtcggtctcgtagCATCTTTAGTTCACCCGTAAatcgatgaattcgagctcg	ACGTCGAGGAAGCAATCAGATT
HELC1506	C2_06650C_A	AAATTCAAACCCTTTTTGGATCAAACATTATTTTTCTCCAATGgatgtccacgaggtctctACAGTTCACGTAGCGAGTTCcgtacgctgcaggtcgac	ACTATTAAATATCTACATTAATTATTTCTATAAGTTGACTCATcggtgtcggtctcgtagTCTACACTAACCTCCAGTTGatcgatgaattcgagctcg	TGAAAGGAAATGAAAGGAAAGGA
HELC1510	C3_05370C_A	TTTTGTTTAACCCAATATCAACAAGCATATAATAGAGAATATGgatgtccacgaggtctctCGGACAATCGATCCGGCAGAcgtacgctgcaggtcgac	CTACTTCTACTTCTACTTCTTATTGGTAGATTTCAGTGTTTACcggtgtcggtctcgtagGGGTTTCTTCAAGGCGCAAGatcgatgaattcgagctcg	CGTGCCCATTTTCCAGAAATCA
HELC1513	C4_01700C_A	TTAACTTACTAACTAATAATTAATTAAAAAGTTTATTACAATGgatgtccacgaggtctctTTTGAAGTGAACGACTCGTGcgtacgctgcaggtcgac	TTCAATGCTCTTCTTAATTTTTAAAACTCTTTATTGAACTTAGcggtgtcggtctcgtagTAGAGTAGAACAACCGGAGAatcgatgaattcgagctcg	CAACGGTTTGCAACATTCAACA
HELC1516	C4_04480C_A	TATCATTTTACTACACCAACACATCACAAACCAATACATAATGgatgtccacgaggtctctGCATTACTTCATGCCGCGTGcgtacgctgcaggtcgac	ATTAAAAAGATCTACAAAATAGAAATGGAGAAAGGAAACTTACcggtgtcggtctcgtagAGGACCAGTGTTGATTCGCGatcgatgaattcgagctcg	GGATCGCCATATTGAGTGCATT
HELC1517	C4_04900W_A	TCACTACACCAAGACCGGAGTAATTAATTAATATACAGAGATGgatgtccacgaggtctctCAGATGCACTAGCGATCCTTcgtacgctgcaggtcgac	TTATTATTATATAATTCTTAACTATACCAATCAAGCTTCTTAGcggtgtcggtctcgtagCAACCGCGTTATTTAGATGGatcgatgaattcgagctcg	ACTTGATTGATGATTACCCAACGT
HELC1519	C5_00370W_A	TTAATCAAGATATCACTTTCCACGAAATTACAATTCAATAATGgatgtccacgaggtctctATCGACGTAGACAAACCTCTcgtacgctgcaggtcgac	TGGAAAAACAAGGAGGGGAGGAAAGTACACATTTCATATCTAAcggtgtcggtctcgtagGAGGTCGCTGCGATACTCCCatcgatgaattcgagctcg	AACTTTTAGATAGGTGGCGGCA
HELC1523	C5_03540C_A	ATTCAAGTCTAAGTATACTAACTAGTACAATTTTTTTAGAATGgatgtccacgaggtctctTATCCTGGTGGTAAGCGAAAcgtacgctgcaggtcgac	TATAAAATAACCATTAGATATAGATATTTTTTAATTAATTTATcggtgtcggtctcgtagCTCATATAAGCACCAAGACTatcgatgaattcgagctcg	GGTGTGTTGTCTGGTATTTCGTG
HELC1524	C5_04080C_A	CTAAATTAATCCAGCGTTAATTATCTCAATATAATCAACTATGgatgtccacgaggtctctGGCGTTTCGCGGTCCCAGCTcgtacgctgcaggtcgac	ATAAATGCTAATCGTTTATTATGCAGCTATTCAACCAAGTTATcggtgtcggtctcgtagGTAGTTAGTAGGTTTCGACCatcgatgaattcgagctcg	ACAGAGGAGTGTAGCAACCAAT
HELC1525	C5_04590C_A	CTTTTTTGAAATACATTATTAACTACATAACTAACAGAAAATGgatgtccacgaggtctctACACAGCGGCTTCAGGGCGGcgtacgctgcaggtcgac	GTATAAATATTTCTCAAAGCTTCTTTTGTTTTTATGAACTTAAcggtgtcggtctcgtagTCACCACAAGAAGAGTACCGatcgatgaattcgagctcg	TTTCGTTGTTTTGGGGCAAGAG
HELC1527	C6_00650C_A	TTTCTTACCACTAGTCAATCAATAAAATAAATCAGTCATCATGgatgtccacgaggtctctTCTTCCGACTACGCATCATTcgtacgctgcaggtcgac	ATATAAAAAAAAGACAAGATATACAAATAACTAACCTTCTTAAcggtgtcggtctcgtagTAGATCGCCTATTACCTGGAatcgatgaattcgagctcg	TCCCTGATTCTATCGTGTTTGCA
HELC1530	C6_01700W_A	CTTTTTCTTACAACCTTTAATACTTGACATCATATCAAAAAGTgatgtccacgaggtctctAATGCTGAGGGCCTTTGCGTcgtacgctgcaggtcgac	TATACATGTAATATATATTAACAATCAAAATCAATTACTTTAAcggtgtcggtctcgtagTGTGTTGAATCTTGCTCTTTatcgatgaattcgagctcg	TAGAAACGGATGGGAGGAGTCT
HELC1532	C7_00710W_A	CCTTTCTTACTATACAAATCACATTTAATAATACATCAAAATGgatgtccacgaggtctctGGCTATCAGCACAGCCACGAcgtacgctgcaggtcgac	TTGGTTGTTGGTTTGATGAATGTTTAAACCGTGATTTGTTTAAcggtgtcggtctcgtagGCGGTTGGTGTCTGGATACTatcgatgaattcgagctcg	CTCAACTACGCGCACTAACAAA
HELC1535	C7_00960W_A	ATTTTTGTATAGTTCAGTTTAACAACACCAGTAATCAAACATGgatgtccacgaggtctctTTGTGATAGAGGGTTGTTAGcgtacgctgcaggtcgac	CAACTTATTCTAACATTTGACATAAATGTAGAATTAAATTTAAcggtgtcggtctcgtagGAAGGGTTAGGTACCATTCCatcgatgaattcgagctcg	AGGATGCTGTCAATAATTCGGC
HELC1540	CR_03770C_A	TATATTATAGTAAACATACACCACATTAAATCACGTCAAAATGgatgtccacgaggtctctAGCCCGTTTCAAGTTGATACcgtacgctgcaggtcgac	TTATAGTACAAATTTTTGTAATAAATTGATTAAACACATTTATcggtgtcggtctcgtagTCTTACGGTGCTCGGGTACCatcgatgaattcgagctcg	AGGAAGATGAAGAAACAGCCGA
HELC1542	CR_07630C_A	TCAGTTTTTGAATTATACATATTAGAGAAACAAGTTAGCAATGgatgtccacgaggtctctACGGGACCTTGGTTAGTTAAcgtacgctgcaggtcgac	GATTGTGTATGTGAGTTTTTTTTTCTTCTAAAAAGCCGTTTACcggtgtcggtctcgtagTACACAATCTGAACATTGCCatcgatgaattcgagctcg	GGGATTGCAGATAGAGCCCTTT
HELC1543	CR_08010W_A	CCACAACCTTATCCTTTTACATTGAAATAGTGCTGATACAATGgatgtccacgaggtctctTTAATTAATAGCGCTTCCCTcgtacgctgcaggtcgac	TTAATGAGGACTAGCAGTCTGTTTTCTTTTTATTGGCACTCATcggtgtcggtctcgtagAAGTAACCGCGCGGGCTACGatcgatgaattcgagctcg	GATTGCAGACCCACAAACAGTC
HELC0324	C4_06260W_A	ATAAGGATACAAACTTTTAGAGATTTGAAAGACTATACGACCAGATGTCCACGAGGTCTCTGGCACTATATACACGAGAAACGTACGCTGCAGGTCGAC	CATATATGATATTTCTAAAGCCTAAATTGTGTATTATACATATCGGTGTCGGTCTCGTAGTCATATGACTGTCGTTTGCTATCGATGAATTCGAGCTCG	CCATATCCAGTAGCATTGAC
HELC0326	CR_04440C_A	TCTTGTATTAACTAAGAACTACAACAATCAATTACAGTCAAAAGATGTCCACGAGGTCTCTTCACGAAAGTGGTATAGGATCGTACGCTGCAGGTCGAC	AAAGAAATACTTATACATATTTATCTTTTAGTTTAGGCTTCGCCGGTGTCGGTCTCGTAGACAGGCTTACGTGCAGGAGATCGATGAATTCGAGCTCG	CTTGAGCAAATTATCGCATC
HELC0006	C2_01830W_A	GAAAATAAATGGTGAAACAGCTTCACAAGATATTTTACGAATGgatgtccacgaggtctctCCGCAGTATCAATAAGCGTAcgtacgctgcaggtcgac	ACAAAGACTTAACGAGTTTGAGTAATAGTAGTAGTAGTGGAAGcggtgtcggtctcgtagGCAGAGTCCCTATCAGCTATatcgatgaattcgagctcg	GGATCTGGGATTTGTACGTG
HELC0007	C3_02110W_A	GAAGTTCTTTTATCATAGACCATATAGAAACTAATCAAAGATGgatgtccacgaggtctctAAATGATCGTTCAGCGGGTTcgtacgctgcaggtcgac	AGAATGATTTAAGCAAATATAATGTAACAACTTCACCATCTAGcggtgtcggtctcgtagCTCTACGGAGACGACTTTGatcgatgaattcgagctcg	GATTTGGCACCAGAGTGTTG
HELC0010	C1_00180W_A	AACTTCCTTTAACCTTTCCTTCTATCTTAATCAATCAACCATGgatgtccacgaggtctctGGATGACCACCAGACTAAGCcgtacgctgcaggtcgac	TGGATTTCTCTTATTTCATAATATACAAAACTCCGATGCTTAGcggtgtcggtctcgtagGGCCGACTCTACATCATAGatcgatgaattcgagctcg	CGACGTTGGGTATTATTTGACC
HELC0051	C1_13700W_A	TTATCTCGATATTAATATTAAAAAAATATAATCATTCAAAATGgatgtccacgaggtctctGCGGAGACATCAGACTAATCcgtacgctgcaggtcgac	AATACAAAACCAGATTTCCAGATTTCCAGAATTTCACTCTTAGcggtgtcggtctcgtagCCATCCAGCATAGTAATCAGatcgatgaattcgagctcg	AATGCCTTGGGTGGCTAT
HELC0062	C2_03810C_A	ATCCTTTCTTGATACTAATTCACCAACATATACATCAAAAATGgatgtccacgaggtctctACTTTAATAGCAGTGGAGCGcgtacgctgcaggtcgac	CGTAATAATATAAACACTAATAAACAGGGGATGGTTGGTTTAAcggtgtcggtctcgtagGGCATCCGATCAATCTTAACatcgatgaattcgagctcg	GTGTGGGCAGTGTTGTTGT
HELC0080	C3_04670C_A	CTAGTTTTGTATCTTAGTATCATATACAACAGGAACAAACATGgatgtccacgaggtctctTGACAGCGGGTAACTCTACGcgtacgctgcaggtcgac	TTTGCTAATCTTTTAAAATTCAATTTAACCACATCAAGTTTATcggtgtcggtctcgtagCACTAAGGCCAATCACTTGAatcgatgaattcgagctcg	GCAAGGCCACCTCTACTT
HELC0082	C3_05100C_A	CATACACCTTTTCTTACTATCATCATTATCAAGAACAACAATGgatgtccacgaggtctctAGTGATCACCCGCTGAATcgtacgctgcaggtcgac	GGGAAATATTGTACAAAAGAATAAAGCATGTTAACCACCTTAAcggtgtcggtctcgtagACTCGGAGTTAAGTATCACGatcgatgaattcgagctcg	ACTTCTTGGTGTGGTTCCTG
HELC0095	C4_01270W_A	TTTAGTTAATTTTCAGACAGGCACAAAGGAATTAATCACCATGgatgtccacgaggtctctTCCTTTCGGCGATAGGGATTcgtacgctgcaggtcgac	CTTTCATGCAATCTCTTAGCCAACAATTGAGCGTATTCAGCAGcggtgtcggtctcgtagCAGGCTTACCATTGACTCGatcgatgaattcgagctcg	GGAGGACAATGGAAATGTGG
HELC0096	C4_01520C_A	AAAAAGATTTACTAACTTAATTTCAATTATTTATAGAAAGATGgatgtccacgaggtctctGGCTTTACGAAACTCACACAcgtacgctgcaggtcgac	ATACAATTCTCAAACTAAAAGAAATCAATAGCATAACATTTAGcggtgtcggtctcgtagATACTGGCAGAAGTCCGCACatcgatgaattcgagctcg	CCCAAATCATCAAGCTTCTCC
HELC0383	C1_06100C_A	TGTTCAATTGGAGAAATATACTTAATATAATTCTTAAAATATGgatgtccacgaggtctctACGCGAATAGTGTTCAAGGCcgtacgctgcaggtcgac	GCTAAATATCTACCTTTGATAACATTACCAATGGAAGCTAATTcggtgtcggtctcgtagGCATATCCGTAAATACTCAGatcgatgaattcgagctcg	CCATATCAACATCGCCTTC
HELC0387	C6_01970C_A	TTATACTCTTCATAAGGTTGTACATCATAGAATAACAACAATGgatgtccacgaggtctctCGCGACATCATAGCAACTTAcgtacgctgcaggtcgac	CTACATTTAGATGTAACCGATTCTGTTAGCAATATCCAAAGCAcggtgtcggtctcgtagGATGTTTCACCATAGTCCTCatcgatgaattcgagctcg	CAGGACACTTCCCAACAAC
HELC0446	C6_01610W_A	TTTTTCCTTTTCATTACAGTAATAATAAAAATAATCCAAGATGgatgtccacgaggtctctTACAGGCTTAATTGCCGTCTcgtacgctgcaggtcgac	GAACCTTTTGGAGCTTCTTTGTAAGAAATAGCAGCTTCTTCACcggtgtcggtctcgtagGATCCGAGAACATCACTCTAatcgatgaattcgagctcg	CCCATTCAATAGCACAAGACC
HELC0027	C2_02310W_A	AGAAATATATTTCTATATATCTATTTGTTATTTATTCATCATGgatgtccacgaggtctctAACCACGTCGGATCAGAGATcgtacgctgcaggtcgac	TCGTAGTCCCACTCCCCACCATTTGAATCTGCATCCATCTTAAcggtgtcggtctcgtagGTAATTCGACCCAATCCTGAatcgatgaattcgagctcg	GGTGAAGTTGTTGATGGGTTTG
HELC0390	CR_07510W_A	TATCCACAGAACGGTATATCAATATTTACAACTAGCCACCATGgatgtccacgaggtctctCGAAGTCATGTAGACGTATGcgtacgctgcaggtcgac	GCACTAGTAAATGCTGTATACATAATATGTTTAATATATTCATcggtgtcggtctcgtagTAGATCGTTAGTTCCTGGCCatcgatgaattcgagctcg	CCGCTCCTCAAGAAAAGAAG
HELC1574	C2_06810C_A	TCGTTTTCTCAATAGTATATCCATACAATAACTGCCAAAGATGgatgtccacgaggtctctCATCTCATGGCATAGAGTTGcgtacgctgcaggtcgac	CCAAAACTTCAGCATCGTATCTGGTCTTGAACCATTGGATGGTcggtgtcggtctcgtagTCCATTTGGTGTAAGGACTGatcgatgaattcgagctcg	GCAACCATCTACCCACTCTC
HELC1652	C4_06720W_A	TTTCCAATTCAATCTAGTTTAATAATCATACATATACATAATGgatgtccacgaggtctctGTTACAAGCTCTCCGCTGACcgtacgctgcaggtcgac	TTTTTATTTAAAATTTAGAGTATCCCAAAATAACCTAATCTATcggtgtcggtctcgtagTCTCTTTCAAACCGCTTAGAatcgatgaattcgagctcg	CAAAGTGCCATCAAAGGTGTGT
HELC1653	CR_05050W_A	ATTTACTTAACAACTACAACAACACATATATATAACAAAAATGgatgtccacgaggtctctCGGATGAAAGCCAAGTATCGcgtacgctgcaggtcgac	TTTTTGTATTTTATTTATATGGAAATGTTTTTTTGAAAATTAGcggtgtcggtctcgtagTCGAATATCTCCAGGTCGGGatcgatgaattcgagctcg	AGAGAGGGATAGCAAACAACTT
HELC1655	C3_07750W_A	GCACCTTCAATCTTTTCTTAGCATTGTTCTCTCTTCCCACATGgatgtccacgaggtctctCCGATGCACGCACTCAATGTcgtacgctgcaggtcgac	TTGTTGCTAAAATTAGTATTGATTTTTTCGAAAAATATTCTAAcggtgtcggtctcgtagCGAGAAGTAGTTTGACCCTGatcgatgaattcgagctcg	CGGAATCCAACGACTACCTCAA
HELC1657	C3_06870W_A	CAATTAACATCAACAAACTTTACAATCAAATTAATTAACAATGgatgtccacgaggtctctAAACTCGTCAGTGGCGACTAcgtacgctgcaggtcgac	CAATTAACTAAAAAAATCAAATCAAAGTCTGGTTTTACTTCAAcggtgtcggtctcgtagTCATTAAGATCACATAATTGatcgatgaattcgagctcg	TGGGACATTGGTAATAGGAAGTCA
HELC1658	CR_03830C_A	AGTTATTGACTTTATTAATTACATTACTATTTAATCAACCATGgatgtccacgaggtctctATGGAGCTCACGAACCTCGGcgtacgctgcaggtcgac	AACTATAACAAACTATTAAAACCATAACCCACTAATCACTTACcggtgtcggtctcgtagGCGCTATTGGCACGGGTGTAatcgatgaattcgagctcg	GAATGCCATCACGTGACTCAAC
HELC1660	C1_05780W_A	ATTCACTAATAAAGAAACCTACAACACAAAATACCTTACCATGgatgtccacgaggtctctATAGAACAAGAACTGCCTGAcgtacgctgcaggtcgac	TTTACTTGTAAAGATGTCTTTTGTTGACTAATGATTTATTTATcggtgtcggtctcgtagTCTGTCTCCTATTTGTACGGatcgatgaattcgagctcg	TGAACCACCTCCAACAACACAT
HELC1661	C2_04020C_A	AATTATTTGACAACAAAAGTACCATAACACACAACCTAGAATGgatgtccacgaggtctctGGACACTGAAGCCTTTAGATcgtacgctgcaggtcgac	GCTACCTACCGAGTCTCCCGATGCAAAGCAATCACTCACTCAGcggtgtcggtctcgtagGACCGCTGTCGGCACGTTCCatcgatgaattcgagctcg	ACCGAAGAAATCATCAAAATCAGGA
HELC1663	C2_05530C_A	GGAATTAAAGAGCTCTATTATAAAGAAATACTCAATCCAAATGgatgtccacgaggtctctAGAGACACACTGTGATAGACcgtacgctgcaggtcgac	ATGTTCAAAACAAAAACCAACCCAGAAAATCAGACAACTTTAAcggtgtcggtctcgtagGCGTAGCCCAGGGCGTTGCGatcgatgaattcgagctcg	AGGAGAGCTGTTCATTCTTGCA
HELC1664	C2_09740W_A	CATATCATTCAACTTGACGTTTATTTAACTAGAAACAACCATGgatgtccacgaggtctctAAGCCCGTTACGAATACACGcgtacgctgcaggtcgac	ATAACCACAATCAAGTGCATAAAAATAAAACTACGATACTTACcggtgtcggtctcgtagACTGCGATTAACTTCAGTGAatcgatgaattcgagctcg	TTCCATCGCAGCATTTCTTTCA
HELC1666	C4_01050C_A	TCCCCTTTTTGATTACTACAATAGATTAAAGTAACTAAAGATGgatgtccacgaggtctctCCCGTAATGAGTCCAGGAGTcgtacgctgcaggtcgac	TGAAAAGAATCTTCCAAATATGAATAACAAACTGTACGACTACcggtgtcggtctcgtagGGTCTTCAGACTAGATCAAAatcgatgaattcgagctcg	TCCTTCATCATTCCTTTCCGGT
HELC1667	C1_04180W_A	ATTTTATTAATCGAACACATATATATTTATATAATTAAAAATGgatgtccacgaggtctctCGAGAGCTCTGATCGGATCTcgtacgctgcaggtcgac	TAAACCATTCATGACAAACCTCTCTCTCTCTTTCTTTTTTTAAcggtgtcggtctcgtagAGCGCGTATAAAGCTTTCGAatcgatgaattcgagctcg	ATTTAACAACCCTCCACCCACA
HELC1668	C4_01710C_A	GTTGATTCTGTGGGTATTTCATTCGGATCATTGTCAGTTGATGgatgtccacgaggtctctTATTAGGCGGCCTGGGAGCCcgtacgctgcaggtcgac	CAGCAGAATTGGCTTGTTGGGCATATTGATTGTAACCTCCTACcggtgtcggtctcgtagTCGACAGCTATGACATTATTatcgatgaattcgagctcg	GCTGGTTGGCAGAAGAAACTTG
HELC1669	CR_04100C_A	GTTTTTTGTTCATTAGCTACCACCAAATCAACTATCAACAATGgatgtccacgaggtctctGGCCCAGGCAGTTCTTAACCcgtacgctgcaggtcgac	ACCCTTGACTTAAGAATACTAAAAATGTTTTTAAGCAGCTTAAcggtgtcggtctcgtagGAGGCTGCAGAACCGGGCACatcgatgaattcgagctcg	GTGTATCGCAGTTAACGTGTCG
HELC1670	C1_03020C_A	CAGTTCTACTTCCTACAAGTCTAACCACCAGAAAGCAACAATGgatgtccacgaggtctctGATAGTGAACCACCTTCTACcgtacgctgcaggtcgac	CATCTCCTAAACAACAACTCACTTTAATGCCAAGTTTGCTTATcggtgtcggtctcgtagCCGGAAGCGCAAGTAGTATAatcgatgaattcgagctcg	GCACATATTTCGCAACCGTA
HELC1683	C2_01710W_A	CTACAAAGTCACTTCCAAAAACCACAGTTATATACCAGCAATGgatgtccacgaggtctctTCAAGACACAAAGCATGAAGcgtacgctgcaggtcgac	TCTCCATAGAATTAGATATACCCGCACATCTACTCCTATTTAAcggtgtcggtctcgtagCTATTGGGCAAGGTGTCTGTatcgatgaattcgagctcg	GCCGTATTTGAACGATGGAG
HELC1742	C2_05190W_A	GTTTTCTTTCATAATTGAAAACAAATTCAAATCACTACAAATGgatgtccacgaggtctctAGCCAACCGAGTACGCGTTTcgtacgctgcaggtcgac	CTATCTCTCTATATACCTAGATATAACAATATATGTATCTCACcggtgtcggtctcgtagGCTTTATTATATGCATAGGTatcgatgaattcgagctcg	GCCATTATCCATGCGTGCTAAA
HELC1743	C2_00220C_A	CCAAAATCAATCATCGTTTTCTCTTTGTACAGCACCCATCATGgatgtccacgaggtctctTATGTTAGAGTAAATCGGTTcgtacgctgcaggtcgac	CTAAAGTTTAATTTTATGTATATTTAATATATAAATCTGTTATcggtgtcggtctcgtagACATGACAATGGGAGCTTCAatcgatgaattcgagctcg	TCACGCTTTAACCACTTCAACC
HELC1745	C3_02470C_A	TGAAAAAGTATTCAAGTATAGTAATCCAAAAGATAGAACAATGgatgtccacgaggtctctGGCGTAGACGGGTTATGCACcgtacgctgcaggtcgac	AATTCAACAACATGCATTCATTTTATTTTATCAATTTCCTTAGcggtgtcggtctcgtagAATGTTAGTGTGATGACCTGatcgatgaattcgagctcg	TGTGATCGTAGGTGGCTCTTTT
HELC1747	C2_04600C_A	CTTTTTCTCCATTGAAATCCACATTAAATACAATTCAACAATGgatgtccacgaggtctctACCACAGGATCTCATATCAAcgtacgctgcaggtcgac	CGTTTTTGAGAAGCTAATCTACCTCTTTGTCTTGAGTTCAATCcggtgtcggtctcgtagCTAAGGATCTTTGATCATGGatcgatgaattcgagctcg	GCAACGTACAATACATGGAC
HELC1749	CR_07420W_A	AACTAGACTTTTTTTTATACCACTCTGGTAATTCATCACCATGgatgtccacgaggtctctGTATCTGCCGATTTACGGCGcgtacgctgcaggtcgac	TGAATTTAAACTCTCCTTTGTACTTGTTTGCAAATGCGCTTATcggtgtcggtctcgtagTGTGCTCGGATATGTATCATatcgatgaattcgagctcg	TCTATTTTCCGTGCCTTCCTCT

## Sheet: GRACE Primers
Supplementary Table 4: Primers used in this study.
GRACEv2 Registry	Feature Name	Primer 1	Primer 2	Primer 3	Primer 4
GELC0002	C1_04210C_A	TTTTTTACTTACACGCCAAAGTTCAGTCGTCAAATCATAAGTTCTTTTTTTTTGAAACATACAACTAAAGactggatggcggcgttagtatc	GATCTACTATTACCGATCAATCAATACCATTATTAGTAGTAGTAGTAGTAATATACATACCTGCAGCCATcgactatttatatttgtatg	AAAGACAACGAACCAAACCTTT	CCCAATCCACTTTCACCAATGG
GELC0004	C2_09840W_A	CAAAACAATAAAACCACAACAACAGACCACCACAACTACTTGGCTATTCTTAACAACTTCATCTTGTACTactggatggcggcgttagtatc	TCAAGGGAGCAAATTCTAAATGTTCAGTAAGAATTGCTGTAGTACGTTCGTCTAAAGTTTTATCTGACATcgactatttatatttgtatg	CCTGCCATGATGAATATGTGTG	TGATTCTAATTTCCCCATACCAA
GELC0005	C2_01480W_A	TGAAAAAAAAAACAGAGATCTCTGGTCATTAATATTCACAGCAATTTACACATCATCTCAACTATATCAAactggatggcggcgttagtatc	AAGTCAAATCATCATCGTTTGCAAAAGATGGTTCCTTTTTAACTTGAACTGGTAGATCACTGTCTGACATcgactatttatatttgtatg	GAACTGGACATTTTGGGAACTC	ATCTTGCTCTTCCTCGTCTTGT
GELC0006	C2_01830W_A	ATATTGGAAGAAATGGCAACTGGTTGAATTGAAAATAAATGGTGAAACAGCTTCACAAGATATTTTACGAactggatggcggcgttagtatc	CATGAATTAATATTGACGATAAATATTGAGTCCATAATGATATGGAATTGGGATAATTTTCAACTGCCATcgactatttatatttgtatg	CAAAAGATTTGGAGTCACAGAC	TCAAATTCAATTGCCATATCCCA
GELC0007	C3_02110W_A	TGCTTTTAGTTGAAAGAGAGGTTTTTAGAAGAAGTTCTTTTATCATAGACCATATAGAAACTAATCAAAGactggatggcggcgttagtatc	CACCAACTTCACCACCAACAGCTCTTAAGTAAAGGAATTTAACTTCATTTGGATCAAATTTTGGAGGCATcgactatttatatttgtatg	TAACACTAAGAAGAGGCTAGGG	TGGTTCTTTCAAAGCGGTGATG
GELC0008	CR_02550C_A	TACATAAAGTAGAATCAGCTATTCTTGTTTTTACTATCAATTATAAACCAATTCAATAAACATACATACAactggatggcggcgttagtatc	TTTGTTGTTGTTTTGGAATGTTGGGGATTATCATTCCTGAAGGTCCCAATAATCGTCTTCTATCACTCATcgactatttatatttgtatg	TTCTGGTGTTTGAAATTGGGAG	ATGAACCTCTGATTGGACGTGG
GELC0009	C3_01530C_A	GTAAAAGTTGATTAATCATTAGTAAGATTAACCAACTATCAAAAGTTTCAAAATTGAAGAATAACTCAAGactggatggcggcgttagtatc	CTGGTGTAACGTTATTGGATGCGGAATAATTATGTAGAGATAACTCATCTAAATCAGGTATTTCTATCATcgactatttatatttgtatg	TCAATGTCGCACTTTCAATACA	GGCGGCAATTGATCTTTGGTAA
GELC0010	C1_00180W_A	TAGTAAAAAATTCTTTTTTTTTTTTTTGAAAACTTCCTTTAACCTTTCCTTCTATCTTAATCAATCAACCactggatggcggcgttagtatc	CAATAGAGGCTAAACGACCCAACAAATGGCCTTTACCATCAATAACAACAACTTTTTCAAATGAGGACATcgactatttatatttgtatg	TTTTGTTGTGTGGATTAGGGC	AGATGGGGCTCTGAAATGGAAT
GELC0012	C1_01880C_A	GATTGAAATATAGCATACATATAGTGTGCGATTCAACGGGTTATTTTCTTTTTTTTTTATTTTTGGTATTactggatggcggcgttagtatc	TATCCAGAATCACGCTACCATTATAGCCAGGGATTCGAAGCAAGTCCTCAAGACTTGAAAACTTCTCCATcgactatttatatttgtatg	TATGTTGTGTCATTCAGGTCCA	TGGCCTTGATACTTTTCTTGGA
GELC0013	C1_01940C_A	AAAAAAATTCTTTTCAACAATCAAAAACCTTCTTACCAAAGCTATAATATACAACAATTATTTACCCATAactggatggcggcgttagtatc	TTGTTGGATAGTTTGCTAACAAGTCGGTTGATAACTCTATAAACTTCTCTATGCTCGTCACTTTAGGCATcgactatttatatttgtatg	ATTGACACCCTCTACTGAACTC	TCTTTAGATTTGGTTGTGGTGT
GELC0014	C1_02460W_A	ATTTGCAAGACTATATTTGCAAAAAAAAGTTTTATCCATACTAACAAATAATTCTTTTATATTAGACAAAactggatggcggcgttagtatc	TATTGTATCTAGATTTTGGGTATGGTTTGTTTTTACAGTATCTGTAACATCTAGCTGGTCTTCTAGCCATcgactatttatatttgtatg	GCATATTTAGATTGCCACCACA	ACGTGGAATGGATGAACTCTGA
GELC0015	C1_02900C_A	ATAAACAAATATTTCCCTGCAAAATTATACCATAAAAAGTATCAATCTTGTGACGAAGAAACAGACTTCAactggatggcggcgttagtatc	TTGTATTGAATTCATTGAATGAGTCCGACTTTTTGAACAGGAAGTCTGAATTATGGACATTTCCTGGCATcgactatttatatttgtatg	ATCACCGGATCCAACAAGTAAT	TTGCCCCGATACCATACTTCTG
GELC0016	C5_05280C_A	TCTGGAGAAGAAAAAAAAAATACTGAAAAAAAAATTTTACAACACTCAAGCACCATTAAGACAATATCAAactggatggcggcgttagtatc	TTCTAACGGAGTTGAGACCCGGTTTTGCTAAAGGGATGGAGGTTGGTGTGAATGTCTTTATCTTGAACATcgactatttatatttgtatg	ATCAAGGATAGATGTGTTGCCA	GGGAACTCAACACCAGCTACAA
GELC0018	C2_04950C_A	TCTATTTCATTGAACACATTCCAATTTTCACAAGTTTATAATAGTAAAAGTTCAAATTTCAAGTTTAACAactggatggcggcgttagtatc	CACCAACACCACCAGCAATGAATTTTTGAACCATTGATTGGTTCATAGTTTTATATGCTGTTCTGAACATcgactatttatatttgtatg	CACTTTGAATCCTACAGTTTAGTCA	ACAGGCAGCACAAACTTCTCTA
GELC0019	C2_01620W_A	TACTTTCGTGCACAAATTTGTTCTTAAACCTTTTCATAATACTAACATATGAATTTATAGATTTTCAATAactggatggcggcgttagtatc	ATAAGACTCTGGAAGTAGATAATAATCTAGTTTGTTGTCTAGCAATTCTGAATGTAGTACGAGAAAGCATcgactatttatatttgtatg	TGCATGACAAAGTAGACTCAGA	ACCTTCACTGATTGGCATTTCC
GELC0020	C1_09030C_A	TTTTTATCATTTTCTTTTACTAACAATTTCAAACACATAGTTCCCCCCCCTCCCCCAACAAGTATTCAATactggatggcggcgttagtatc	TAAGAATGCTAGTAGTAATAGAAGCGGTGTTGGCTTTAGTGGCAGCTCTTTGTAATGATCTCATAAACATcgactatttatatttgtatg	TTCCTGTACCAAATCCCACTAA	CAGCTGGAGTTAATTCTTGCCA
GELC0022	C1_12590W_A	TGAGATTCTACAAGTCAACCATAACTACAACACTTTTGCATTATCTTTGCATTTCTAATTATTCATAATAactggatggcggcgttagtatc	TGGCCCAATAAACAGCACAGTTGGCAAGTCCAGTAGTTTTGGTAACAATAGAAGTTATGACAGAAGACATcgactatttatatttgtatg	TGCATTAGGAAGTCTACGATGT	TTCACCAACAGAGAAGAAAGCT
GELC0024	C1_07600W_A	ACAAATTCTTACAACCATTTTTACAACCACATCTTCAATAGCAATATCCACATATACACACATACACACAactggatggcggcgttagtatc	TTAATCCTAATCCATTAACAAGTTTGTTGAAATCAACTTTTCTGGCAGCTTGTTTAGCAACTGATGACATcgactatttatatttgtatg	GACCCCTTGAAGAAGAAGAAGA	ACTGGTTTAAATCCACTAACAGCT
GELC0027	C2_02310W_A	TTTCTTTGGTGGGAGTTTATTTAATTTGTCAGAAATATATTTCTATATATCTATTTGTTATTTATTCATCactggatggcggcgttagtatc	ATCCAAAATTGAATTTTTGAGGTTTATATTTGAACAATGTTGAAATCGGAAACTTGAACGTAAACTTCATcgactatttatatttgtatg	TCTCTCTGTCTTTCTAATTCGCA	ATTCACCGGTACTAGCATCTTT
GELC0028	CR_01740W_A	GTGAGAATTGTTTCTTACATTTTCCAGTATTAACTTCATTAATAACAACATTATCAACCTATTCAACAACactggatggcggcgttagtatc	CTCCAGCTTTAACTAATACCTCACTTAATTTCAATTTTGGAATCTGTCTTAAAATAGGTGTGAATCTCATcgactatttatatttgtatg	GGCGGAGACTTCTAGATAGTTC	TCTTCAATCAAACCACCACCAA
GELC0029	C2_08650W_A	TTGGATAAGTTTTTAACTAATAGTTCACCCATCATTAATTAACCTATTCCCTATCTATATATTCAGAATAactggatggcggcgttagtatc	TTGATGTTACTGATGAATTGAAACGTAAAAATACAAGCTGTCTAGTTGATAATCTAGTTATTCTCAACATcgactatttatatttgtatg	TTAAAACCTGCCAGAATTGTTC	ATGGCAGCATAAGGTCTTGGTT
GELC0030	C2_05760C_A	TTCTCTTATTGAACTAGTACCTACTATATTTTTACATATTCTCCATAATAAATAATTTGATACATAAACAactggatggcggcgttagtatc	CATGGCCTGCCAATCCAAAAAATGCAGTCATTATAGCATATGGTAACAACCCTTCAAATGGAACTGGCATcgactatttatatttgtatg	ACCATACAACAATGCTCTCTCT	TCTTTTCAGCAGTCTTGAACGA
GELC0031	C2_07550W_A	TGCTAAAACAAAACGAAACTATTGATATTTTATTTATATTGTTGCTTAACTTGTGCACACCCACAGAAACactggatggcggcgttagtatc	AGCCGGCAACTCCTCTGGAACTGAGTGACAACGCCTTTGCTGGTGTTCTGAGGCCAATTCTTGATATCATcgactatttatatttgtatg	ACACATTGATAGTTGACGCAAA	TGTGGATCGTCGTATTTGGCAT
GELC0032	C1_02650W_A	AGAAAAAACCATTTTGTTAAGCTAATAGACATTGAAGTTTCTATTATTTAAACGTATAACACAACGATCCactggatggcggcgttagtatc	ATGGGTTTGGATATTTATAGCTTGCATCTGGAAGTGGTGCCACTTCTGCTACCTCTACTTTATCAGACATcgactatttatatttgtatg	CGACTTGTTTGATGTCATTTGC	AGAGTCTTGAACACCCTTAGCA
GELC0033	C1_01630W_A	ACTACTACTTATTTAATCACTTTTGATTTCAAACAACTATTAAATTAAACTTTATACATATTTATCCAAGactggatggcggcgttagtatc	GTCGAGTTAATTCAGCTTGTTTGGCAAAGATGGATTTGGTGGCGTTTAAACCTAAAGCTTTCATAGACATcgactatttatatttgtatg	TTTCTTTGTCGCAGGGTAAGA	CCAGATCTTGTCACTTGTGGGT
GELC0034	C1_03090W_A	ATTTTTTACTAGGAATTTTTTTCTTTTACGTTTTTCACTTGTTTCATATAATCACCAACTCAAGTACAACactggatggcggcgttagtatc	ATGGGTCAACGACCTTCTTTTTTAATCCTTTCTTTCCTTTGGACAATCTCTTGTTTTTACCGACAGCCATcgactatttatatttgtatg	ATCCTGCACACTAAAATTGAGC	TCTTCGGAACCTTGTAAGTCGG
GELC0035	C1_03900W_A	GATGAGACAGTACAGAAAAGAAAAACTCACAATTGAAATTTGAACCATCAATTATAGATTCACATTATCAactggatggcggcgttagtatc	GTACTTGATCAATAATTGATGTTTCAAATGGTGACAGCTTTGTTGTAGTTGATGTTGTTGTTGATGCCATcgactatttatatttgtatg	GGCACACACATAATTTTCAACC	ACTCCATCGTTATCTTTTGTTTGT
GELC0036	C1_04420C_A	AATTGTTCAGTACTTGCATTACATCATTAACAAACTAGCAACGTTTAGCAGACGTCTCTTTTTTTAAGCAactggatggcggcgttagtatc	GTGATACGGCTTTTTGTTTAGCAAAAGTGCTAACAATTTGTTTACCTGCTAAAACTTGTCTCGAAAACATcgactatttatatttgtatg	GGTGTAGTATCAGGTTCAAGCT	AATGACTGAAACTTTGCCTTCA
GELC0038	C1_05360C_A	TAGCCTAATTCATTTGTTTAGAGTCTGGTTGATAGATAATTATAGATTATTATAGCTTTCATAAACAAGAactggatggcggcgttagtatc	AACTATCCTTTTTTTGTCTTTTGGATCGAGGTTTTCCAACTAAATTTTCTCTCTTTCTTTTGGTCCCCATcgactatttatatttgtatg	GGCCATCTGAACCCTTATATAGT	TCGTCAAAACCATCACTCGAGT
GELC0040	C1_07270W_A	CACACATTACACACCACAAATTTATTTGTTCCAACAAACCAACAAAACACGCTGTTAACTTGTTATTTCCactggatggcggcgttagtatc	CTGAATTGTTAAGTTTCGGTACATCATTAGCTATCTTTTGTACAATTGATTTGCTTCTACCTCTAGTCATcgactatttatatttgtatg	CAATTTGTTCATCTCTGGGGTC	TGTTGTCAGACTCAGCCTTTTG
GELC0041	C1_08330C_A	AATTGTTCATCTATAATCACGAATCAATTGATACTTACCCACTTTTTATTAAATCTAACTCAATTACACCactggatggcggcgttagtatc	TATCTTTGTATTCCAACTTACCACCGTTGGTTTCGAAAATAACAGCTTTTTGAGTAGTTGGGACAGACATcgactatttatatttgtatg	CTCCTCATCCATCTTATTCGCT	CCAGCGTAATCACCAACTTTCC
GELC0042	C1_08450C_A	TTCAGTTTTTTCTTTTTTTAGCACAAGAGAAAAGTATTCAGCTCATAAATAATTAATATATCCATATATCactggatggcggcgttagtatc	TATACGAGATTAATAAGCAAGTTTTACCAACGGCACCATCACCGACAACAACACATTTTATAGTTTGCATcgactatttatatttgtatg	CAACCAAACCAACTTTCATCCT	GGTTCGTCTCCTATCATCACGG
GELC0043	C1_08460C_A	ATATAGTTTTCAACCACTATTACTACCTTTCTATTTTTTTAAATTTTTTTTTTCAACAAAAAAGCCATTTactggatggcggcgttagtatc	TTTCATCAGACGAGAACTCAGATGTATTCAAAGTTGAATTTGGTGATTCTTGTTTCACTGTCATCATCATcgactatttatatttgtatg	CACACACATTACCCAATTCCAT	TTCTCCAAAGGTTCGTGAAGAT
GELC0044	C1_08540C_A	AATTTGGACTGTTCAGTTACAGTTTTTTTTTTATAATATACATATCAACCATAGGTATTTATTGCTATTTactggatggcggcgttagtatc	TTGTAGTAGGGGTTTGCTGCTTCTCAGATGATGAAGTACCAAATTTCAATTTGTTTTTAAACTTGAACATcgactatttatatttgtatg	CCACCCCATCCATACTTAACTT	CCACCGGCTTTATTATTGGAGC
GELC0046	C1_09730W_A	AATAGTAAAAATTATTGAGATCTCTTATTATTTGATTTCTTTTTCTGCAAATTAACAACCTTTCAGGAGAactggatggcggcgttagtatc	TATGCAGATGCCGTCTTCCACTATTCTGTCTCCTATCATTTCTAGGGGTAACTGGTTTAGATGAGGACATcgactatttatatttgtatg	GACGAATTGGCTGAAGAATTGA	ACCCATATAGAAAACTTGCAAACGA
GELC0047	C1_10380C_A	CCACCAAGAGACTTTAATAACTGATTTTCTCGAGATACCTTAAAAGATCAAATAGAGTTTTATAGATCTTactggatggcggcgttagtatc	GCTGTTGTTGTTGCAAATGTTGCAAATAAAGCTGTTGCTTCTGCTCGTCTGTAAGCTGATCGAAATTCATcgactatttatatttgtatg	GTTCATACCCGTTTGTCATTCA	GCGGCTGTTGTCTAATAGGAGA
GELC0048	C1_11450C_A	AGATTTCTTCTTCTTCAATTTTTCATTCATTCATTTCGAATTTATAATCAATTAAAATTTCCATTCAATCactggatggcggcgttagtatc	AAATCTTATCTGGGTGACCTTCACCAACGGATTCTGAAGTGAAAAGGAAAGTTTCCTTGGAAGTAGTCATcgactatttatatttgtatg	ACCTATCATTAACTGTGGCCC	CAGAATCGTCGTAACCAATGTGT
GELC0049	C1_12600C_A	TGATGGTTTAAACTGTCCCCAAAAAAAAAATTTTTTTTCTTACTATGAGAGAGAAAGAAAGAAAGAACAAactggatggcggcgttagtatc	CACTTTGCTCACGTCTTTGTAACAACAACGTCGTGTAAATCCAACCAATATTATTATTCCTCAAATTCATcgactatttatatttgtatg	CGGGATCTCTCTTAAGACCTTC	ATTCAAAGAAGCTCCTCGACTT
GELC0050	C1_13360C_A	GCTCTTCACAAACAAACAAACTAATACCATCCACTCCTTCCACCACATCCACCACCACCACATCCCCATAactggatggcggcgttagtatc	TAGATCGATGATAAATAAGATATAATATATCATATTCATTAGTTAATTGTTTAAATGTTGATTTATCCATcgactatttatatttgtatg	CTAATGCCTTTTCTGGTTGTGA	TCTTTCGTGGTAGTGGTAGTGG
GELC0051	C1_13700W_A	ACTCCTGGTTTTCTTTCTTTCTTAGAAACATTATCTCGATATTAATATTAAAAAAATATAATCATTCAAAactggatggcggcgttagtatc	TATTGAAACCAATCAACTGATTAATCAATCAATTAGAATTGAAGCTAAACTAAAACATACCACCGTCCATcgactatttatatttgtatg	AAAAGATCCATACACACACGTT	GCCATTTCCATTGATCGTCACA
GELC0052	C1_14000C_A	TGGCGATAATTTCGTACACTTTCTGATTCCAAACTAAATTACCACCAACTCTAACTTTTGTTCTTTGAAGactggatggcggcgttagtatc	TTTTGAGTAATTCAACCAATGCTCTTGAAATGTTATCTAGTTCCGTAGTCTCTTTTACCAGATTTTTCATcgactatttatatttgtatg	TCAAATTCGGTTGTAATGCAGT	ATGTCGGCAGTTTTGGAATTCG
GELC0053	C1_14110C_A	AAGCTGTACCCATCATTTCTTCTTCTTTTTTCCTCTTTTTTCTTTCTTTCTTTATCATCATTATACTACAactggatggcggcgttagtatc	GTAATGGTAATTGGGATGAACCTTGTTCACCTTTAACGGAAATAACAGAAACTTGTGGTCTTGATGACATcgactatttatatttgtatg	TCCTTTTACTATATTTGCACCCA	TGTTACCAAAAGCAGCTTGACC
GELC0054	C1_14210C_A	TTCTTATAGGTTTCAATAGTACATTGTTGATAATCGAATAAGCATTTTTCACATTTCCAGATCAACCGCTactggatggcggcgttagtatc	ATGTTGATTGCTGGGAAGCCATAGACCCCAAGGACAATATTGATGCCTTTTTTCTTAAACCTTTAAGCATcgactatttatatttgtatg	CAACTGTTTCTTCTGTAGCAAGT	TGGGAAAATAGCATGTGGTTGT
GELC0055	C1_14490C_A	CGATGATCTCTAGTATATATTTTTAGAATGCACGAAAAAAAAAATTTCTTTTAAACCACCAAAACCAACAactggatggcggcgttagtatc	ACCTTTCATCTTTATAGGTGACTAGCGGAACAACATCGAATAGAGATTTGATGGTGGCGGGTACATTCATcgactatttatatttgtatg	TATCCATTCCGTAGTCATCCAC	ATGCATGGAAGGAAGTGGTGAT
GELC0056	C2_00430C_A	AAAAAAAAACTCCAAGAATATTTATTCATATACATTCTCTGTACCAAATATACACAACTAAGAATATACAactggatggcggcgttagtatc	ACTCATTTTCTTTACTGCTTGGTTGTGGATACTGTCCATCAGCATTTTTTCTCCAACCTTTTGGTGGCATcgactatttatatttgtatg	TGATCTTTGGTGTCTGTTTTCG	CCGAGACAGTTTTCCGATTTGC
GELC0057	C2_00570W_A	GTTTTGATTTTTTGGTTCTTTTTTTTCTCCGTCTTTAGTATAATCTATAGTTGACTCTATCAAGACAATCactggatggcggcgttagtatc	TCTTTTTTTTTTCTAGTTTGTGATAAATATACATACGTGAAGAACTTTGATTTTCAATATCTTTTGTCATcgactatttatatttgtatg	AAAATCATCAACGAGCGGAAAA	ATCCGTTGTTGTGTGTGATTGC
GELC0058	C2_01320W_A	AACCAACCAACCAAGACAACTTATCTTCTTCTTATAGACCACCCTTAAGATCAACAACAATATGTCGCCAactggatggcggcgttagtatc	TTAATTCAGAATTATCTGATTTCAGCCTAATTGTTGCTAAAACTGTAGAAACTTCAGTATCTATATCCATcgactatttatatttgtatg	TTATTTCAAGTGCCTGCTTTGA	CAACATCATCAGTAACTCTATAATTATGAC
GELC0059	C2_01730W_A	AAAACAAATCACACATCATATACATATATACTGAATTACTTTGACACACTCCATACTTTCTTCCCGTATCactggatggcggcgttagtatc	TTAATTGTAATTCATCTTGATTATTAACTTCTTCAATAAGCTTATTTAATTTATCAACCGATGTTGTCATcgactatttatatttgtatg	AAGGGATTAGTGAAGGTGAGTG	GACTAACGAAATTGAAATTATTGACG
GELC0060	C2_03070C_A	ATTTTTATTTTTCATTTTTTCACTTGACTGTTTACATATTAATTAGGCGTTAATCATCATCCCCTTAGTTactggatggcggcgttagtatc	GAGTAAACACAAATCGAAATACAATTGTAAGAAGATAAAACGTTCTCCAATTGAAGTTGATCTTGATCATcgactatttatatttgtatg	AACATTATTGCTCAACCAAAAGT	GCAAAGCAGTCAAGTTCAACT
GELC0061	C2_03100W_A	CCTTTTTTTTCCTCTTTTCCTCTTTCCTCTTTTCTTTCTTGTATCAAACCTTAAAACATAAAATAACAAGactggatggcggcgttagtatc	GAACCAAATCATTCTATCCTTGCTCTTCCTCCCATTAAAATTGATCAATTTAAATTAATTACATACCCATcgactatttatatttgtatg	CAAGAAGAGAGGAGACAGGAAA	ACATTGGTGACCTTGTCCATCA
GELC0062	C2_03810C_A	ATTAAATTTTTTCAAATTTTCGTTTTAACAATCCTTTCTTGATACTAATTCACCAACATATACATCAAAAactggatggcggcgttagtatc	CTCATTCTATCGTTTAATGTCACATTCCCATTATATCTCTTATTCTATTTATCACATACGATTTACCCATcgactatttatatttgtatg	CGTGGTATTGGTTGCAAGAAA	AGATGTTCAGAAGTGGTCCCTT
GELC0064	C2_05540C_A	AGTTTTTTCATTGAGAAGAGTACTCAATAAGACAGACACACCAATACTCTAAATCCCCAAGTATTATGAAactggatggcggcgttagtatc	CAAAATCGTTAGTATTTCAAAGAGCAAAAAAAGATTAAATCAATGTTCTTTAATTGTATGTACTTACCATcgactatttatatttgtatg	AGATCCAAACATTGTAGCTCAG	TTGAAATCTTCTTCGGCACAGC
GELC0065	C2_06830C_A	TATCACAGACACACACACACACAAACTATAAACAACGACTTGATCTTACTTTGATATTATATAAATAGCCactggatggcggcgttagtatc	CATTATCTTTAGATTCTAGAGAATCTATAAGATCTTTGGTCATATGATCATCACCATCTATATGACTCATcgactatttatatttgtatg	ACCATTCATAATCTCATCTCCCC	TTCGGCACTGCTTTAGGATCAT
GELC0066	C2_07060W_A	TTTTTCTTTTAATTTCATTTACATACATTAACACATCTACTAACCATATATCACGAGATACAAAGGCAAGactggatggcggcgttagtatc	TATTTCCAAAATATAGTGATGCGTCTATATTTCTATCAGAATCTAGTCTCTTTCTGAAAATTATAGACATcgactatttatatttgtatg	AACTTTTCCATCACACATCAGG	TGGCATCAATTCGTTTCAATTTCA
GELC0067	C2_07170C_A	ATAGCATAACTTTCCAAACAGCAAACACATCAGTGGCATTGATTGTGTTGAATATTCAATAGCTATTTAAactggatggcggcgttagtatc	TGGAGTCAAATTTTTGTTTTTCCAAATTCAAATCATCAAGGGAAACTCGATGAGTGACTCTATCAGTCATcgactatttatatttgtatg	ACTGAAAATCGCAACAAACAGA	AGGGGCAACTGGTATGTTTTCT
GELC0068	C2_07490W_A	AAGATTATTTTTGCTAGCAATTTGAATTTTGTATTGAATACTCTGCGCTACGCTACATTTAGTATTATTGactggatggcggcgttagtatc	TGGAGGAATTGAACCGGAAGAATCCTCTTCTGGCAATGCAAGTGGGTTTGAAAGTACTTCTAAACATCATcgactatttatatttgtatg	TTCAACGTCTCTCTACTCTCAC	ACCGCCACCAATTTCTCGATAA
GELC0069	C2_07960C_A	TTCATACCAGAAGCTTACTATCATAAACTTAGACTGCATCAATTCCAATTATACAACAAACCCTTAAATCactggatggcggcgttagtatc	TATCTGTGCCTTCATTACAAATTACTTCTTTAGCTGACCCAGTGTCATCAGCTGATACAATTACTTTCATcgactatttatatttgtatg	TTCGGTCTCAAAACTTGTTAGC	AGCATCAACTGGCAATTCAAAA
GELC0070	C2_08180C_A	TGCAAACTCTTCTCATTTGATTTCTATTAAATTCCAAATCACTATACCCTTTGACTAAGGAATCTAAGAAactggatggcggcgttagtatc	AGAACAAGAAAAACTGTGAGGCATATGGTATAAATAAAGCTCATCTACATACTTCTAAAGAGTTGCTCATcgactatttatatttgtatg	ATTTAAACCCATCTCAGCTTGC	TCGGGATTTAGTTTGGCTCGTT
GELC0071	C2_08470C_A	GTGATTAATATCCATTTTATTACCTCTCCTCTCCTTATAGAATAAATATTATAAGAATAATGATACTACTactggatggcggcgttagtatc	ATATATGATTTTCTCCTGGACCCCAATCAATTTTAGTTCTAGGATAAAGTAAACGATTTGATCTATCCATcgactatttatatttgtatg	TCTCTTTGTCTCTGTACACGAC	TTCCGTAATTCTGCTTCCGTGA
GELC0072	C2_10230W_A	GAATAGGAAGGTTGAAATCAAAGAAAACAGACATTGAAGGGGGGAATTGGAAGCTCTTTTCATAAACTAAactggatggcggcgttagtatc	GTTGTTGTTGATGATGATTATCACTATTATTCTTACTACTATTACTATTATTACGGTTAGTATTTTGCATcgactatttatatttgtatg	AGAAGAAGTAACAACGTTCCTT	CACGAGAACTTGGTAATAACACTGG
GELC0073	C2_10860C_A	AGCTTGTGAAAAAATCTTATTTATTTGACCAATTTCGCCAACAATTCATCCATCCCACACCACACGCAAGactggatggcggcgttagtatc	GTCTTTCCACCTTTTCACCCTTGGCTGCTCTAAGTATCAAGTCATTCTTCAATGGAGGGAATTCTGGCATcgactatttatatttgtatg	GGTCAAATTAGCGATGTCTTCC	ACCATGTTGATTTCGAAACCCA
GELC0074	C3_00090W_A	TCTTAGTCAATAAAAAAATTGTCTGCCAAAAATTTCACACCTCTTTATCCTATCACAACCCAAATCAACAactggatggcggcgttagtatc	CGAATTGTCTTCTGGCCAATAATGGGTTGGAAATAACCTTTCTAGTTCTGATGGTAACGGCGTCACTCATcgactatttatatttgtatg	TAGTCGTAGGGTCCAACTTCT	AAGCTGGTTCGAATCTTTTGGC
GELC0075	C3_00280C_A	GCATTTACAGGTAAATTTATCCATAGTCTCGTACTAAACTGTTTTATCAGTAATGGATACGTTTACCTCTactggatggcggcgttagtatc	CTATGTGTGTTTTGAATTCTGTTGATCTCTGAGATGGTACCAAGAAAAAAATATTGTTTACAAATGTCATcgactatttatatttgtatg	CTCGCCACCAAGAAATAAGAAG	TTGGGTAGTTCATTTCGAGGGG
GELC0076	C3_00510W_A	TGGCTATTTTTTTTTTTCTGGATTTCTTCCCCAGTTGTGGAAGAGATGGTCAATACAATAAATTTGATCGactggatggcggcgttagtatc	TGATGGCTTCATATAATTCTCTTATAATTGGCAACTGGTCATTGTCTTGGGTAACTGCTCGTACTTCCATcgactatttatatttgtatg	GAGCTCTTTGGTAGTTTGTTGA	CATTGGCTACTCTCCGTGTATCT
GELC0077	C3_00570C_A	AAACTTATAGACGTGAATTCTTTTTTTTTGGGATTTACTTTTTTTTTTCCAATTTTGATATATATTTGACactggatggcggcgttagtatc	GGTGTACTTTGTCATCGTTATCATCTTTCGACTCTATTGAGCAACAAAGCAACGATGAAAGTAATCCCATcgactatttatatttgtatg	AAACGAGAACATCAAACCGAAA	CGCGTTGGAGTGTTCTTTGATT
GELC0079	C3_02690C_A	CGTCATTGAAACGTCCAATAATCTTTGTCATATAGAAAATCTTAAAAAATATATCCACTCGTTTTAAAAAactggatggcggcgttagtatc	AGATTGCTGCAGTTGATCTTGCAGTAGGATTTGGTTTCTTAGATTCGTTTTTTCTTTTTCTTCCTGCCATcgactatttatatttgtatg	TCATTTGCTGTTTGGTTTCTTG	ACTAACCAAACATTGAACAGCA
GELC0080	C3_04670C_A	AGAAAAACACTTTTGAAAAAACAACTTTTTCTAGTTTTGTATCTTAGTATCATATACAACAGGAACAAACactggatggcggcgttagtatc	TATCACACATATCCTGTCTTGTCTCTTTGGTCTAATCTCAATCAATACGTTACATACTAGCGTCAACCATcgactatttatatttgtatg	TGTCTTCTGCTTCCTTACAAGA	TCCATCCACGACAATACTTCAT
GELC0081	C3_04930C_A	GAATAACTATTTGTTTTGAGTGATTAGGTACCACATATGTATTTTGTCCTATAATACCGTATTCGAAGATactggatggcggcgttagtatc	AATACTCGTCTTCCAATGAAGCATCGTACATTATACGAGTTAAAAATGGAAACACAGATAAATTTTTCATcgactatttatatttgtatg	CGCTCATACAAACGTAGACAAA	TGCCACAAGAATAGATCGTTCA
GELC0082	C3_05100C_A	AAAAATTTTCACTAGCATTTCTTCAATTTCCATACACCTTTTCTTACTATCATCATTATCAAGAACAACAactggatggcggcgttagtatc	CGTTGTCTGATTTTGGAGCGGTTCTGTGACCGGATCTAACGTGTTGTTTACTGGTGTGATCTCTACCCATcgactatttatatttgtatg	TGTTTGGAGAATGGCAAATACG	AATGTCTTCTGCCCAAGGACTT
GELC0083	C3_05150W_A	ATCAATAAAAGGATTAGTTTATTTTTTTTATTTTAATTGTATTATTCGTTAAAAGTAGAGTATATAAATAactggatggcggcgttagtatc	GCTTTTCCTCTTGCTTCTCGTCGTCTCCATATAAATCTTCGAAAAGGGCTTCGTCGTCTTCAAGTGACATcgactatttatatttgtatg	GCAGGCAAACACTTCTCTTAAA	TGATCCTGGTGCAGTTGATGTA
GELC0084	C3_05650W_A	TCTTCCTCCTCCTCCTTCTTTTCTTTTCTTTTCTTTTCTCCTTCTCCTTCTCCTTCTCCTTCGTTGAGACactggatggcggcgttagtatc	GATTCATTTGCTTTGTAGGAATATTATTATGAGATGCTTGAGCAGCCGCCAAAGCAGGGTTTGTTGTCATcgactatttatatttgtatg	GAGAAAGAAAGAAAGAGCAGCA	AGGTTCAAATTTTATGGCCACGG
GELC0086	C3_06110C_A	ACAGATAATTTATCTTTCTCCTATTCATTTGCACAATTAAATCCAAAAAAAAAAAAGAATCGAATTCCATactggatggcggcgttagtatc	TGAAGTCTATTGGTGGAGTATTCAAGTTTTTCATTTGTGAAGATAATTGGCTCTGAGTCTTATGCGACATcgactatttatatttgtatg	ATAGAATAGCAAGCAAGGTGGA	AGTGGTTGAATGATATCTGCTGA
GELC0090	C3_06890W_A	TATTTCAAAACCGACTTGTTTCTTTTTTTCTTTTACAACCAATTAATACAAAAGAAAGACAACAATCATAactggatggcggcgttagtatc	CAGTTGTGGAAAGATCATTCTGCTTTCTCAACAAAGCTTCTGTTTCATTGGGTTCAACAGAAGTAGACATcgactatttatatttgtatg	TTCTATTTTATCTCGCGCGTTG	TGAGCTTCATCCCAAACAACATG
GELC0091	C3_07110W_A	TTGAAGGGTTTTTTAAGAATAACTCCTTTGAAATATTGTTTTTAAAAACAAAGAGTTTTATTTATTTGTGactggatggcggcgttagtatc	CGTGTGCATTCAAATCTATGTCTGTACTCTTGGATATTGGCATAAACTGCAGCATAATTCTTTGAGGCATcgactatttatatttgtatg	ACTAGTTAGCCATTTCCCATGT	CACGCTCTTGGTAAGTTGTTGT
GELC0092	C3_07390C_A	AAAATTTTTCTTAACCAGAAATTGTATTCCTCAACAACTGCAAACCTACCAATCAAATTCACCTTCCACAactggatggcggcgttagtatc	CATATTCCTGTGGTGATAATTTGAAAACACGGCTACGTGTAGAAAAGCCTCTATAACCTATTCTGAGCATcgactatttatatttgtatg	AACCTTCTTCTTTAGCTCGTCT	AAGGTTGCCACTTCATCTCCAT
GELC0093	C3_07440W_A	CCTTCTTTCTTTTTTTTGCTTTTGCATTTCTTCAAATATCAATTAATACATTTATACAATTTTAGAAACAactggatggcggcgttagtatc	TGATTGAAGTGATTTGTTGTTTGGTACCGTTAGCTTTGAAGTTGCCACCTACGAAAAATTGACGAGCCATcgactatttatatttgtatg	AGGAATCAGTTGTTGTCCATCT	TGGCACCAACATCCAAGATTTG
GELC0094	C4_00780C_A	AGCAAGTACACATCCTATTAAGTTGATCTTTTATTTTGGCTTTTAATTATTTTAATTCCCAACATTATAGactggatggcggcgttagtatc	CATTTTTAGGGAAACACCCAAAATTCAATGTACGAATGTATTTGTCGTTGATCGAACTCTCAATATACATcgactatttatatttgtatg	CCCTGTCCCATATCGTCATTAT	TCTCATCGTAACTCTTTGGTGT
GELC0095	C4_01270W_A	AAAAAAGTGGAAAAAAAACTTCTTCTTACATTTAGTTAATTTTCAGACAGGCACAAAGGAATTAATCACCactggatggcggcgttagtatc	ATTGCAATATCCAAATAAAGACTCTAATTATAATCACTGATATAGGTTATATTCAATCACATACCTTCATcgactatttatatttgtatg	TGTGCGGTTTACTTACTCTTCT	TGTCACCCCTAATAAACTAGTCCT
GELC0096	C4_01520C_A	TTTATTGCTCGTCCTTTAAAAGAAATGAATAAAAAGATTTACTAACTTAATTTCAATTATTTATAGAAAGactggatggcggcgttagtatc	ACTTTGGTTCTGGAACGGATTCAGTTGGTAAATTACGACCAATAACTTGATATTCGTTTAATCTAGACATcgactatttatatttgtatg	AAAGTCATTGGATGGGAGAGTT	TCTGGATTCATATCTTAACCAAATACCA
GELC0097	C4_02770C_A	TTTTTTGGAGAACTTTCTATTTTTTTGCAATCTATTCATTACTAATCAATACGATTGTTTCACCGTCCAAactggatggcggcgttagtatc	ATGAACATTGTAACACTTCTTCACTGGTTAAGTCTATAGTTTCAAATGTAGTATAATCTCTTTCTGTCATcgactatttatatttgtatg	GATGCCATTACTTCTAGGGTGA	GGTCCTCCTCATCATCCCAATC
GELC0098	C4_03170W_A	TATTTTTGTTAGCGTTTCGTTCATCTCTCAATATCCCCCATTGAAACCATTCCAGAACAATATTCCAATTactggatggcggcgttagtatc	CTTCTTCTTCCTCTTCAGCAATAAAATCTTCTATTTCATCAAGTGGAATTTTTCGTTTCAACAGACTCATcgactatttatatttgtatg	TGCCATACATCCAACTCCAATA	AACATCTGGTCTTGTGGTTCGG
GELC0099	C4_03270W_A	GCGATAAAAGCATCTCATCTCATCTCTCTCTTGTTATATTGAAGTCGATCAACCACACCACTATACAATCactggatggcggcgttagtatc	CTGCAAAAACTTTCTGTCTTCGCTGTTTGTTTTTGATGTTCTTCAATGCTTCACTTGTACTAGTACCCATcgactatttatatttgtatg	GCTGTCTATTCTCCAACACTTG	ATCTCCTTCAACTTCAGCAGCT
GELC0100	C4_04000W_A	AAATACTGAAGAGACATAGTTATTTCTATCACACAAACAAACAAACAAACAGAGATTATTACAAAGTATAactggatggcggcgttagtatc	TTCCATTGATATAATTATCAATATACACTAACTGCTCCAATAATGCTGCTGATGTTGGTTCGTCACTCATcgactatttatatttgtatg	TATATAGTCACCTTTTATCTTATCCTCC	TCCAATTACTATCACTGTTGCTGT
GELC0101	C4_04920W_A	TTTTTTTCTCTTTTAAAGAAGAAACCACTAAATTTCATTCCCAGACAGCAGATTACCTTACTATACCATTactggatggcggcgttagtatc	ACCCTTCCAATCCAAGAGCCAAGTAATGGTCTTTTCCTGGTTTAAGATACTTGTCCAAATCAACGACCATcgactatttatatttgtatg	TACATTTTGTTTAACTCGCGGT	ACTTCTGCACGGTTTGTTGATG
GELC0102	C4_05100C_A	ATTTAATTCACATTTCCTTTCATCAACTAATTAAACCTCTAGTCATTATCATTATTTATTTCATTTAATCactggatggcggcgttagtatc	CACCAGAAGATTTGGCAGGTACTTGTTGTTGTTTTGTTTTGGTACGACCACCTCTTTTCACAATAGCCATcgactatttatatttgtatg	TTATCGGTGCAATCATTCAAGG	TCTGATACACCCACTTCTTTCT
GELC0103	C4_05180C_A	ATATATAGTAGAATGTATTAATAGACTTGTCATAATGATTATATAACGTTCAATATATCTTTCAATAAAAactggatggcggcgttagtatc	AAAAATAAGAGAAGATGTACTCAAAATTATTATCCATTTTCACACGACCAGTAAGTTCCAACATTCCCATcgactatttatatttgtatg	AGATGGTGTATTTCAATGGGGA	TTGATGTTGTCGTTGCTGTTGG
GELC0104	C4_06030W_A	TCCTTGCTATTTCATTCCCCTTTCCTTTAATTTTTTTTTTCTTTAATTTGTATACAAAATATAACTCAAGactggatggcggcgttagtatc	ACATGCTCTCCTTCATCTCCATAAGGTTCATCTTGAACAACTGTCACTATTCAAATCATAAACATACCATcgactatttatatttgtatg	GCGTTTTCCTGATCATTATCCA	AGAAAATGCTTCTTTGAATTCAGC
GELC0106	C5_01390C_A	CTTCTACTACCGATCAAGGATTTCTATTCTATATATTGAATTAATTAGGTCTTGAGCTTTACGCTTTATAactggatggcggcgttagtatc	AGGCTGTGGTGGTGGTGGTTGGAGATCTATCTGGTAATGACCCCTGTAGTGAATTTTTGGCTTGCTTCATcgactatttatatttgtatg	AAAATACCTTGCCGTTCGTTAG	TCAGGTAATGTTTGTGTTTGTTGT
GELC0107	C5_01540W_A	AAAAAATAACTGAAATTTTTTTCAATAGTATTAGAGTATATTCTTAGACTGTATCGAGCATTAAGACACCactggatggcggcgttagtatc	CTTTCTATCTATCTCTAGTACAAACCTTTTGGAAAGCTCTTTCAGATTGAACAGTTAATTCAGTAGCCATcgactatttatatttgtatg	TGTGTGGGAGTGCATATAAAGT	GTTGGTTGTATTTTAACATAAATGGAGTTC
GELC0109	C1_00060W_A	AGCGCACCCCCTGTTCAAAAAAACCAACGAAAAAACAACACAACTTCTTCCATCCCCACCAGCAATGTCCactggatggcggcgttagtatc	CGAATTCAGTTTTGATTGCATCCAACAACTCTGTCAAACGTTGTTGGTGCTGGGTGCGTTGGGGATACATcgactatttatatttgtatg	ACAGCTTTACTACTCTTGGTGT	TTGCCTGTCTCTAGTGTCCAAC
GELC0110	C5_05490C_A	TCGTCTCTGCTTTCGCACAAACTTTTTCTGAAAAAAAAAATCTTTGCAAAAAAATTTTCATCACATCTCCactggatggcggcgttagtatc	TTTTCAATACAAAGTCTTGAGCTTTTCCTTTTTTGGGCTTGGTGGCAGTCATGAGTAGTCGTTTGATCATcgactatttatatttgtatg	TCACTGTAAAACTCCCTGTAACA	TCGAGTCTTCACCGTATTTTCCA
GELC0111	C1_00160C_A	CAAATGAAACATTTTTCTAAAAAAAAAAAAGATTCTTAAAGTTATAGCTTTTCTTTACATCTAATCGAATactggatggcggcgttagtatc	CAACCTTCTTAGCAGGTTTTTCTTCTTTCTTCTTAGACAATTTCTTGTCAACTTTAGATGCTTTAGCCATcgactatttatatttgtatg	AAAACCTTTTGCATCGTTGTTG	TCCTTCTTGTCTTCATCATCGCT
GELC0112	C6_02680W_A	AAAAACTATAACAGCAAGTTAACTCTCCATTGAAATCCTATTTACAAAACCCCAAACACATTTGCCAGTCactggatggcggcgttagtatc	CTAATTCTTGTACATCTTTGTTTATTTGTGAAAGAATTGATTCTATTGTATGTATAGATGTTAGGGGCATcgactatttatatttgtatg	GGAAGACCTGATTTGGAATGTT	ATTATTACTGCTGGTGAAATTTGCA
GELC0113	C6_03110C_A	AAGATTTTATGGTTATTACTTCTATAGTTTTTTGACGCGTTTAACTCTTAAACACATCAAATAGTACATTactggatggcggcgttagtatc	TTCTTGGATCTTGATAGATATATGCTACGGATGATTTATGTGACCGTAGAGTGAATTTTGTAGACAACATcgactatttatatttgtatg	TCTGCAGCAACTAATTCTGAAA	TGGTGTTATCTCGAGAATGGGT
GELC0114	C6_03770C_A	ATTATATCCTAATATTAATATTAATCTATATCCCCACCTCCTCCTCGCCCCACTTACATTTTAATTAATAactggatggcggcgttagtatc	ATGGAGCAGTCACGGTTATATTATCTGGTGTTAAATGTTCAATTTTCGAATTTGGTGAAACGTCAGTCATcgactatttatatttgtatg	TTTGCCTTCCTCAAACAAACAA	GGAGTTGGGGTTAATGCATTCG
GELC0116	C7_00530C_A	AAACTCCAAAAAAAAAACCAAAACAAGATCCAAATATATTATTGCAAAACTCCAACCCCAAAAACACACAactggatggcggcgttagtatc	TATTGAATTTGCAAGTAAGTTTTTCTGAGTCAGCTAGTATATCATCTAGGTCATAATAATCAGTAGTCATcgactatttatatttgtatg	AGCCAGTTGATTTAATAGGTGT	TCAACTGCTAATGGATCGGTTT
GELC0118	C7_01470C_A	ACAAACTTACTCTCTTCTTCTTTTGTAATCATTACAACAATTCTTATATAACTAATATTTTATCTATATCactggatggcggcgttagtatc	TGAAGTCTATAAATCAGTTAGTATACATGAGCAATGCATTGTGTTTAGTTGTAACAAATTGACATACCATcgactatttatatttgtatg	GCCATTTTAACTGTACTGCCAT	TTTTCAACGGCTTTCATGGCAT
GELC0119	C7_01760C_A	ATCAATCAATCAATCAATCAACTAATTTATTTATTTATATATTATATATCAACAGCAATAGACTCACATAactggatggcggcgttagtatc	TTGGAACAAGAACTCTTGATTGTTGAGTTAAAATTCTTCTTGTAGTAGGTAAAATCGTTCTGGTAAACATcgactatttatatttgtatg	CAAAACCAAGAACCAAGAACCA	TTCCCCGTTTCTTCATCAACCT
GELC0121	CR_01230C_A	ACTAAGGTATAAAAAAAATATAAATCCAATAATTAAGGGGAAAAATCTATAATTTATCATTTATAACCTAactggatggcggcgttagtatc	CTGAGTTTGAGTTTGAGGTTGAGGTTGATCCTGATCTTGATCCTATTCTTCCTCCTGTAGTAGAATGCATcgactatttatatttgtatg	CTCCCACCCAATCATAATCTGT	CTTGCTGTTGATGATGACGTGG
GELC0122	CR_02630C_A	TCTTATACCATTACTTTTGATAGATATTCATACACCAAGAATTGTTTCCAACCATTGCTCCTTATTCCAAactggatggcggcgttagtatc	CTGTTTGTATGATTGATGTGGGATAGGGGAATTCATCAGTTCCATTCAATATATCAAATTCTTGACTCATcgactatttatatttgtatg	AGTGGATGACAAAGAACTACCA	TGGCATTAATTAAATCTAACCCATCA
GELC0123	CR_03910C_A	TATAAATTTATACATAAACATATAACGGTCCCCATTTAATCTACCAACGGTTTAATACTCCAGTGCAAGAactggatggcggcgttagtatc	TTTGTAAATTGATTTGCTGTTGAGGTTGTTGGCCATTATTGGCACTTTGATTCTGAGATCCATTATTCATcgactatttatatttgtatg	CAAAGTCTGTTGCAAGAAAGAA	GCTGTTGTTGTTGTTGCTGTTG
GELC0124	CR_03990C_A	AAAATTTTTCGTTCCTACACCAAAGCCAGTGGTGAATCACTAGACTTGTTCATCATATTTTTGAAGTGAGactggatggcggcgttagtatc	TAGAACGAGCTTGGGAAAAGGGTGTCAAAGCTTTCCCCTTACCACAGACAATAACTGCTGTGAACTCCATcgactatttatatttgtatg	TTGCAGGGAGTAATGAAGACTT	ATTGGTGTTGGTCTTCTCTTTT
GELC0126	CR_08980C_A	TAACAACACCACCATTCTATTATACCTTAGCCTTTGGATTATTCAGCACATCACTGCATCAACAGCTATCactggatggcggcgttagtatc	GAAAGTTCAAGGGAGTGGGTGAGTTATTATTACTGTGAAGATTCCCATTTTGCCAGTTGTATCCATTCATcgactatttatatttgtatg	GGTTTCATTGTTCATTTGCTCG	TCTTGGGCAGTTAACGATAATGGA
GELC0127	C4_03900C_A	ACAATTAAACATCACCATCATTCATCTTACATTAACCTTCACGCTATACTGAAACACCATATATATAATAactggatggcggcgttagtatc	TTGGGGGTTTCCGTTGAGAATTTATAATGTTTAATAAATAATTAATTTTAGCATTAGAATCTTGACTCATcgactatttatatttgtatg	TGAGAGAAGAAAAGTGTTGCAA	GAATTTGAATCGACGATGGTAC
GELC0128	C4_04570W_A	TTTGTCAAATTTTCCATTGTCTGCAGTGGTACCAACTTACTACTGGTAGTATGATAGTGAACTTTCAGATactggatggcggcgttagtatc	AAGGCGGTGGGGCAAAATATATGGCAAAAACATAGGAGCAAGCTGTTAGTATTGATAGTATCACTTTCATcgactatttatatttgtatg	AAAAGTGCTCCTCAATACTGGA	TCAAACTGCCTGAATTGGTAAACC
GELC0130	C1_14100W_A	TTTATCTTAACTTGTCTAATATATTGTATACCTTCACCTCATCTATTTATTCCAAGTTAAATTTATTTTCactggatggcggcgttagtatc	CAACTGCACTTTCTCCTAAAAGCACAAGTTTGAATTGGGCAAAACGTTGGTTAGATTGTTTGTTCGACATcgactatttatatttgtatg	TGTCTTGGGTTGAGTGGAATAA	TTGGTGCCAATGACTTGTAACG
GELC0131	C2_06910W_A	AACGATACAGAGTTTAATTTAATTTAATTCAATTCAATTTAATTAATTAATCATATACACTTAATTTTCAactggatggcggcgttagtatc	TTTTACCAACACCAGAGTCTCCTAATATAATGACTTTTAATAATGTTTTCTTTCTAGATGATGATGACATcgactatttatatttgtatg	TGCCATATTTGAAGTTGTTGGG	CCAGCGGTATCCCAGATTTGTA
GELC0135	C6_01120C_A	TAAATTATTCGAAACTTATATCTAAAAACACAAATTAAAGCTATCTATTACAATATAGACTCCCCTATCCactggatggcggcgttagtatc	TTTTGAGTAAGTTGACTTTATAAGGGTTATATCTTGATAAATTATGTTTTGAAAAAATGGGAGATGTCATcgactatttatatttgtatg	AGTTAGTGACATTGTAAGTGTTGT	TCTCCCAAATTCAAATAACCCCA
GELC0136	C6_03630W_A	ATTGATTTAAAGAGACCAGATTTTTTGAGGGATATTTTACACTTGTGTTGATGATACAGAATCATTACTAactggatggcggcgttagtatc	AATACTTTCTCGATGGAATCTGAAAAATGGGTAAAACATTCAGTCTTCTCAAACAAACTCTCGCAATCATcgactatttatatttgtatg	AGTTCCGCATACAACTCTAACA	CGTATTTCAAAGTGGCAATCCCC
GELC0137	CR_00320C_A	CAATATTTCCAATCTTATCATTTACTTTCTATTCCTATAAACCTAGTCAAGAACACAACCCATATTAACTactggatggcggcgttagtatc	TGTTCTGTGGCGTAGGGGCTTTAGAAATATCCCCATTCTTCTTTTTGGTGTTGATTGGTTGTTCAGTCATcgactatttatatttgtatg	AAAACATTGAACATACGCCCAA	CCATAAACACGATTCTTGACTGGT
GELC0138	CR_04200W_A	CTTTTCTTTTTTCCCTTCTTGTTTTTCATATCCACCCACATATTTATTTGCACATTAGATTTATAGAGTAactggatggcggcgttagtatc	TTTTCAATTCAGCATCAGATGCATTTGGTGATACCCCCAAGGCATCGTAAAACTTTGTGTCTTTAACCATcgactatttatatttgtatg	TTCAAAACGTCCAAAAGAACTT	GCAAAGATGTCATCGGCATTCA
GELC0139	CR_06520C_A	AAAACTTCAACCCCACCAACTCCTAACCCTAATATTTCCCCTTTCTTTTTTTGCATATAAGACTCCCACAactggatggcggcgttagtatc	TACCAACACTTTGATCACCAAGAAAGACAATCTTGTATTTTTTTAGTAAATTTGATTTATCTGAACTCATcgactatttatatttgtatg	TCCAGAATCAACAATTTCAACAA	ACATATTACTGCAACATGAGAATC
GELC0141	C1_00360W_A	AACTCCTCTAGCTGTTCAGTAGAAATGTAAGCTTGCCATCGATGTATTAGCTGGTAGTGTTACGAAAACCactggatggcggcgttagtatc	AAAAAAAAAACTTTTGAAGGCGCGCCCTATTTTGTTTGTTTATTTTTCGTGTTTTCCTAATAAAGCACATcgactatttatatttgtatg	CTATTCTATGCGCAAACTCCAC	TGGCATACTCGAGGATGTGATG
GELC0142	C1_00540C_A	AATGTCTAATAGCTCATCCCCTCTTCAAACCACTTTATAGCATTGTGAATTGTTTACTTTACGTAATAAAactggatggcggcgttagtatc	GGTATGAGGGCAAAATATTGTTGAGCAACTCATCTTCATTTGGAGGTTGTGGTTCATTATCTGGCGACATcgactatttatatttgtatg	TTGTAGGCAAAGGATGGTATTT	TCCACATATCCTCACTTTCTTGGT
GELC0143	C1_01070C_A	ACTTTGAATACCCATACATCGTTGAATGATTTTCTTCCATTATAAATCAATTTTAATAAACTAAATAGATactggatggcggcgttagtatc	CCAATTTAGCTTGCTTTTTTGATTTCTTTCTTGTTAGTGCTTTTTTTTTACCAGCACCCAGTGTTCTCATcgactatttatatttgtatg	TCTTAGAGAGAATTCGCGTTTT	ACGAGACTGTTGTGTAGGTGAT
GELC0144	C2_00090W_A	GAAACAAAAACAAAACATTCTTGGTCGCAACACAAGAAAAAAAAAATTTCATTTCACTTTCTCTACAAAGactggatggcggcgttagtatc	CAGCGTGTTTCTTTGGCCCTCTTAGCCAACGTGTAGGGTTAACTAGTATAGGGTGATTGTATGCTCTCATcgactatttatatttgtatg	GCACTCAAACACAATGGTAGAA	AAGTTGATGAAGGCGAGTTTGC
GELC0145	C1_01490W_A	CATTCTATAATCTTAAGAGATCTTAAACAGTCATTACCTATTCCTTGATTTATTTATTATTTCCTTAATCactggatggcggcgttagtatc	TAGCAATGTTATCGGCGTCTTTTTTAACGTCTTTCTTAATTTGTTCGTTAGATGGAGCTTTGGATGACATcgactatttatatttgtatg	CAAATTTGACTCTCTCGCTCTC	TGGTTCAACTCTTTTCTAGCTTCC
GELC0146	C1_01600W_A	AACAACTGAAAATTTTTTTTAGTATCAGACTTCAATCATAATTCTATAACCATAATTCTCCACACAAAGAactggatggcggcgttagtatc	AATGTATACTTCTGGTGAATGACTTCCAAATAGAAGCAACTAATCTACCACTTCTAGTATTTCCATCCATcgactatttatatttgtatg	ATCAGCCATAGATTCATCAGCA	ACGAGCATGATCAGGACCAAAT
GELC0147	C1_01680C_A	CTTTAACAAAGTGTGTGGATAAAACAGCCATAACAACAAAGATATTTTACAAAAAATAACTACTATCACAactggatggcggcgttagtatc	TGGAAAGGGTAGATGTCACTGGCTTTAATTGAATTGAACGCACAGTAGATGAAAGAAGTGTCCTAAACATcgactatttatatttgtatg	ACATGCGTTTATCACACAATTT	TCATTTGTGCTGAAGTAGTTGA
GELC0150	C1_05390C_A	TATTTTTGTTGTTGTTTTTTTTCTTTATTCCTACTGAAAACAAAGAACCAAAAACAACCAGGTAGCGAAGactggatggcggcgttagtatc	CTTCGACTGTAGTTTGAACTTCATCAGAAAATGAGTTGATGCAGTCATTGAAATTCCCATTCACCGCCATcgactatttatatttgtatg	TGGAAGAGGACTATAAGGAACG	TGTGGTTCTCAATTTGGGACTT
GELC0151	C1_05680C_A	AAGTTAACAAGCCATTGATAGTGAAGTATATATTTCATTACATTTGGATAATCAATTAAAAATAATAATAactggatggcggcgttagtatc	ACAATTGAGCTTTGGCAAAGTCACGCTTAACAGCTGTGGAAGTAAATGAACGAGTAAATGATCTTAACATcgactatttatatttgtatg	ATACCTTCTTTCCTCACCCATC	AGGCTACCAACTTTCAAGAGCT
GELC0152	C1_06230C_A	ATTCTAACGGGTTATTCGTACTTTGGAAACCAGCTAATCCTATAGCTTTTTGCACACTTTTTTTATAAACactggatggcggcgttagtatc	TCAACAATTCTTTAGTCCAATTTGTTAACGGTTCAGTTTCTAATGAATTCCAATTTACTTTGAACGACATcgactatttatatttgtatg	TATAACACACACCAATCACCCT	AACGGATTTGCTTGAACCTTGG
GELC0153	C2_00590W_A	GTACAACCAATCACACTTGTCATACGTATAATCGTCTAGTTTTAACGTCTCCAGCAATTTAACTGGGAAAactggatggcggcgttagtatc	TAAACCAATGTCTGCTAGCAACATTTCTATTAATCAAGCATTTGCTAATCATGGGATTTATTAGTATCATcgactatttatatttgtatg	TGAGATAGCGCTACCAATAACA	ACAGCTGAGTTTCTAGTTTGTGC
GELC0155	C1_08520C_A	AAAAAGCAGAATTTGATGAAAATTTTTAGTATTTGTTAGATCCATTCCCCATCAATCCAATAACAGAACAactggatggcggcgttagtatc	GTCTCTTCCCACGCACAAAGTGTTTTATCACATTTGATGTGGTTGTTGGCTTGTTTAATGGGTTAAACATcgactatttatatttgtatg	TCCCTGTTGTTCTGCTTGATAT	TGCTTCAAATCTTCCATGGCAT
GELC0156	C1_08550C_A	CTATTCTATATTTATCCATTAAGATCTTGTAACATTCTGTATAAAGTCAATTTTAGTTGTTCATCTAATAactggatggcggcgttagtatc	CTCTCATCAGAACCAATGATACAGCATTGTACCCAATTGGACTAATAGATGTTACAAATGATCTCAACATcgactatttatatttgtatg	TAAGGGTTGCCTTTCTAACAGT	TTTGGTGATGCTTTGGTTGTGG
GELC0157	C1_08630W_A	CAAAAGAAAAATTTTAGAAGACCTTTATTTGTACCATCTCATAATCAGATACAACACACTACATCCTAAAactggatggcggcgttagtatc	GGGAAATGCGTCTATTCAGTACAAGTAATCTAGTCCATTGTGACAGCAAGAATCCATTCGGGGACCTCATcgactatttatatttgtatg	GAAATGGTTTGAAGAGAAGAGCT	TGCTTCCCCACTAAAGTATCTTCA
GELC0158	C1_09450C_A	TACACACATCTCAAACAATTGTATTAATCAAATTTTACCAATTAAGACGTGGAAACTAGTAAAAGGGAAAactggatggcggcgttagtatc	TTGGTTTTAATGGCAATCCAGTATTGCTTTTACTAGCTGATTTATCCAGTTGAGATATGGATAAAGACATcgactatttatatttgtatg	GCCAGGAAGTTAAACCATCAAA	AGATGTCCCTGGTTTGCAGATT
GELC0160	C1_09670C_A	ATTTTTAAACAATCTTCTTATTACTTCTGTCATTAAAGTATAACATTCTTACTACCATAATCACTACACAactggatggcggcgttagtatc	TCACTCTGACAAGTTTGTTCTTATTGGCTTGTAATAATGTTCCGTCTATTCTGATATTTGAAGCTTCCATcgactatttatatttgtatg	TCTGGAAATGCTTAGTCTGTGT	AGCCAACTTTGAAGCAGCATTT
GELC0161	C1_10260C_A	AAAAAAAACAACCATACAACAAACATTGACTGGTTGTCCAATACACTATACTTAGACCCTTATACACATTactggatggcggcgttagtatc	CTCTTTCTTCAGCAGATAATTCAGAATCAGAATCATCAATGTATTCGCTGGATTTATATGAAGGTGCCATcgactatttatatttgtatg	TCATTATAACAGGACTCGAGCC	AGATGCTCCAAGATCTTCGGTG
GELC0162	C1_10910C_A	GTCATTTGCAAAACCAACCTTTGAAGATCTTGGAATATATATAGTTATATGGATTAGTTGTTGTCATTCAactggatggcggcgttagtatc	CATCAACTGTAGAATTATACGGCAGTGGTTGATCTCCTTCACCCTTAGTTATAAATGAGTTAGAATCCATcgactatttatatttgtatg	AGTTTTGTCTTTCTGTGGCTTC	TGATCTTGCACATCGATTCCCT
GELC0163	C1_12040W_A	TGACTTCCATCTTTTTTAATACTTCAGTAGTTAAACGCTTAGACTTCCAGAATTGTCAATCCGAACCAACactggatggcggcgttagtatc	CACCATCGTCTTCATCATCTAAATATGAGAATTCCAAAAGTAGAAACTGGTTATCAATGATATCTTGCATcgactatttatatttgtatg	ACAATTCTCCGATTCTCAAGGT	AATTACGGCGGCTAATTTCTGG
GELC0164	C1_12260W_A	AACGAGGAGTGAAAAAAAAAAGCGAAACATCCATTAATCAAATCTAGCCTCATTAGCTTCCCCATACATAactggatggcggcgttagtatc	TCTGATCCTTGGTTAAAGAAGATGCATTTATGGTTTCCTTCAAAGTAGGAGTCAATTTAAAGGATGTCATcgactatttatatttgtatg	TCAGCAGCTTTTCTAGGGAATA	CGTCTGTATTCTTGTTCCTTGGC
GELC0168	C1_12690C_A	TCTAAACAAATCAGTTCAAACTAGAATGGCCAACCATAAAAAGGCAAACATTAATCAAATTTAACATATAactggatggcggcgttagtatc	TATCATCTAAGAGGATTAATTCAAGATCATTTATTCGTTTGAAAAGTCCTTCAAATGTATTATCAACCATcgactatttatatttgtatg	ATAATACCAATTCCCTCCTCCC	TGGTTGTGGCTGTCGAAGTATT
GELC0169	C2_04740C_A	AAGCACTAAGCACCAACTTATATATGGAAATATCTAACACTATAGCTATTACAAACTCACTACTCTAATCactggatggcggcgttagtatc	ATCCAGTTAATGTCGTCGGTAGTTCATTTGATGTTAATAAGTTTATAATTTGAGTTAATTCTTGTTCCATcgactatttatatttgtatg	GTGGACACAGTACTGATTGGTA	TCTCGATTTTGCTTTATATGACGT
GELC0170	C2_09300W_A	AGAGAAAAAAAAAAGTGGAATTATAACTTCCTTACTATTCTACATTTATTACTTCTATGGAAAAACAGTTactggatggcggcgttagtatc	GTAGAGTAGAAATTGTTTGCAAATACTTATTATGTGGAATCGAAGAAACCAAGGATAGTTGATGAACCATcgactatttatatttgtatg	ATGTTCTTCACCGCATTAATGG	TCTGATTGACTTTCCCAGGCTC
GELC0171	C2_04770W_A	CTTCTCTTTTAAAAACAACAACTTCATATCTTAACACCTTGCCATCAGTATTTTAATCACAACATCTACTactggatggcggcgttagtatc	ATTCTTCTTGTTCTTTTTCAATCTCTTCTCGTTTAGAAGTAGTTATCCTACGTCTAATTCGAGGTGCCATcgactatttatatttgtatg	GGGGAACGTTGTAATGGAC	TTCCTAACGTATGATGATTGTTTC
GELC0173	C2_01200C_A	ATTTTTTTTTTCCTACTTAGAATCCCCGTTGTTTTATATTTATATTTATTAATCCCCCCTTTTTTTTATCactggatggcggcgttagtatc	CATCATCTTGTGCCTCGATATGTTGAGAAGTGGTTGCTCCTCCTGAAAACACTTCTCCTGATAACGACATcgactatttatatttgtatg	CAAACTACGGTGAAGTGAAGTG	GTTGACTGCTTGGAGTTTCGTT
GELC0174	C2_01260W_A	ACAACAACAACAACAACAACAACAACAACAACAACAACCAATATATATTCATCACTCGATTCGACCAACAactggatggcggcgttagtatc	ATTCAATTGGACTATTTTGACTATAAGCCAAATTCACACGTTTTACTTTGATTGGATTGATCAATGACATcgactatttatatttgtatg	GCACGAAGAAATAACACCACTT	ATCTCCCTAACGGTAGTAAACT
GELC0175	C2_02160W_A	AATACTTCCTTTATCGTCTTGTTTTTATTTTATTTTTTTAGAAAGAGGGGGGAGGAGTAATTTTTCACTAactggatggcggcgttagtatc	CTGATGCAATACATGATGGTGAAATTATTGATATTTCATTATCTTTGCCCCAAACGTGTAATTGTAACATcgactatttatatttgtatg	AAATCCTTTCTTTGCTCACGAG	TGTTTTCAACGAATCACTAGGT
GELC0176	C2_02900W_A	GAATCAAATTTGTTTTGAATTCGGATCAAGTAATATTGATGTTATTTAAATAAACTATCACTTCCTTTCCactggatggcggcgttagtatc	GATTGATGGGGTCTAAATCTATTGAGTTTGGTGATTCTATTAATGGTAATGGCAATGATTGTGAACGCATcgactatttatatttgtatg	GTGAAAGAAGGACGTGGTTTAC	GCCCACCACCAACATACTACAT
GELC0177	C2_03890W_A	TGTTTTGGCGTTTGTTTGTTTTGATTTGATTTGTTTTTTTAATATCAACTTGTTCTACTCAAACAAAGCCactggatggcggcgttagtatc	GAGATGATGTCTGTAACACATCTGAGAGTGTTTCAAATTCAGAATTGGAATTACCAGGTGAACTTGACATcgactatttatatttgtatg	ACACTTTTCAATTCTGGTTCCG	AGTTGATGATGTTCGAGATTTGA
GELC0178	C1_08100W_A	TCATCATTTCTTCCAAAACAATAAAAGTTTTCATTCCCCAATTAAAATAAAAAAAAGAACCCACTAAATCactggatggcggcgttagtatc	AGGTGGCCTTATTCTTTTGGGTCTTGGCCATTTCATCTTCAATGGCCTTAATTTTCTCCACGGTAGTCATcgactatttatatttgtatg	TAATGCCCAAACAATGTGTAGC	TGTAGTGAACTCATAGGCAGCA
GELC0179	C4_01890C_A	TCACTAACAGGAACAACGACATCCATAAACAGTATTATATAAACAACATTTTATTCAGCAAATAATTACAactggatggcggcgttagtatc	GAATCCTTATCTCCTTATTAGTTCCCCAGAGCTTTGAAAAAATATTACCAAAACTAAAAGCTTGACCCATcgactatttatatttgtatg	AAAATAGGCGGCGACAAATC	TCGACAACAAAGATAACTGCTGA
GELC0180	CR_02140W_A	ATTCTGTATACCTTTATACAAATAAGATTTTAAAGCCTATTCACAAACATCAATCTTCTGTCAGATTTCAactggatggcggcgttagtatc	CAAAAGTTAGTATATAGGGTTATTGAAATACAAGTGTAACGGGCTTTTGTTGAATGTACATACCTCTCATcgactatttatatttgtatg	CTGGTGGTAGTAGTGGATTCTC	CTCTCATGGCTGTGAATTGTGC
GELC0181	C3_01470W_A	ATTTATTTGTGAATTTCCTTCCTGTCCTTCATTCGTTCAATATAGATAAACACATCAACTGTCGTTCAAAactggatggcggcgttagtatc	AAAAAAATATAGTTTGTTAAAGAAAAAACATTCATAATGAATATGAATGACATACCACTAAACCACCCATcgactatttatatttgtatg	TCAAACCAATCCAACTTCTTCAC	CAACATTGAACCCGACCGTG
GELC0182	C1_05350W_A	AAAAAAAGCGAGTAAGAAAACTGATACAGTGTTAATTTGCATTAGAATCAAATAGTGCTATTAAATCACAactggatggcggcgttagtatc	CGGAAGAATCTCCTAAAAGAACTATTTTATAAGGTGGTGGTAATATTGATGAGTGAGATGTTTCCAGCATcgactatttatatttgtatg	CAACAAACAAACAACTCATGCA	CAATGAACGGTACCTTTCCTGG
GELC0183	C1_11190W_A	TCAGATACTGTGTTCCATTCCATTCAATTTGCTGCTAACCGATATTCGTACCTTATAATTTGCATTTTAAactggatggcggcgttagtatc	CTAAAATAAGAATATTGTATTGCTCTCTTTTGGTGTATTGAGTGTACAACGACGATGCTAGATGAAACATcgactatttatatttgtatg	AGGAAGATGTTGATGGTGAGAA	CAACTGTGGGTAAAATCCGTTT
GELC0184	C1_02380C_A	TACTAACAACAACAACAACAACCTTATTAAATCATCCTATCTTAAACTTTACCACCTTCCTCTAATTATTactggatggcggcgttagtatc	AACCTAATGTTAATACTCTTATTTCATTATCTTTTAATTTTTGTTTTTTAATAATTGTAAGTAATCCCATcgactatttatatttgtatg	AGTTCTTTCTTTATACGGGGCA	TGGCCCAAAATGATCTTAAACT
GELC0185	C5_05190W_A	AACTTTTATTAATTATCGTCCTGTTTCCTGCTCCCACTCCCGCTCCTAACTGTTTTCCTTCTATTATACAactggatggcggcgttagtatc	TGGTTGATTCCTTTGAAAAGGATGGTACACTTGTTTCTTTATAGGAAATAGGAGAAGTTGGAGATTGCATcgactatttatatttgtatg	TTGTTACTGAGGTTCCATCAAC	CAGTTGACTAAAATAGAATTAAATTGTGCC
GELC0186	C2_09380W_A	TGAAGAGACCATCCCTCTAGGTAAACCACTGGTATATAACCTATACAATTAAAAGAACCAAGTAATAACAactggatggcggcgttagtatc	TCTTTTTTTCAGTATTAGGGTTAGTTTGCTTTATACTAGTCAGTTTCTTGCTCTTATTCACAGATACCATcgactatttatatttgtatg	TCATTACTTGTGCACGATTGAC	ATTTTCATCTTCGCTTGCGTCC
GELC0187	CR_02950C_A	GAAAAAAATTTCATCACATACAAAACTTCTTTGGTGTCAGTGACTTTAAGTTTCATTTACACCAAGCAAAactggatggcggcgttagtatc	ATACTGATTTATTCAATGAACTCTTGGCTATATTATTAATCAAGCCACTTCCCAATATACTTTTCATCATcgactatttatatttgtatg	TTCAATTTGGTGGTAGTCGTTG	GAGGTCTTTCTCTTGTTTCAAGA
GELC0188	C4_01880W_A	TTTCTACATTTTTCCTTTGATTTTGTTATTATCAACAAGCCTAGTTAATAAACAAGTTACACATATAGCTactggatggcggcgttagtatc	CCATATCCCCAAGACCAATTATACCAATGGTCTTGCATTCTTGTAAATTCTTTAATTCAGTTTCCGCCATcgactatttatatttgtatg	GCTCAAGAACCAAATATCCACC	TGAGGGACCATAGATTGACACA
GELC0189	C5_01710C_A	AATTTCAAACTTCTTGGTGTATTAATTCAAATTCATTTCAACTGAAAGTTACTTGTATATATTATCATTTactggatggcggcgttagtatc	GTCGTAGTAATTGCACTGCTGAGGTGCTCCTTATGGAAACTCTAATTCCATACACGCATAAGCCATTCATcgactatttatatttgtatg	ATGGGTTTGGATTTGGTGATTG	AGTTGATTCTATCTTGTGGGTCT
GELC0190	CR_03430W_A	CCATCTTTTTACTATAGAAATCTTTAACAATCCAAGCATTCCATAAACTTGACTTCTTACTTCTAGGAACactggatggcggcgttagtatc	TGGCTGTAATCAATGCAGGAGTAGTACCTGGCGTAAAAACAGATTCCCATAATTCAACAAAAAATGACATcgactatttatatttgtatg	GAAAGTATCGTCGGCTTGAATC	TGGGAGAGTTCGTTATTGCTTTG
GELC0191	C3_01300C_A	TCTTGTACGACCAGTATCAGTGGCATCACCATCTCAATTGAGGAGAACGTTTTCAAAATTAAGTAAAAACactggatggcggcgttagtatc	CTTTTTCAGTAACAAGATCAGATTCATGATCATGTTCCAATTGATATTTCAAAATATTTTCTCTACCCATcgactatttatatttgtatg	TCCTTGTCAACGATTTCCCTTA	GGAGATTGACCTTGACCATTCA
GELC0193	C2_03950W_A	GGAAAGAAAAAAAACTTTCCAACATCTACTATACGAAACACCTACCTACTCTATAACGCAAATTCCCACAactggatggcggcgttagtatc	GTCTAGCTGAATATATCTGTGACACACACGATATACGGGGAATAGATATTAATCCTCTAAACACGTTCATcgactatttatatttgtatg	ACCCATATCTAACCTCCCTACT	ACCCACCATATAATCCACGGTT
GELC0194	CR_10370W_A	TCTAAGAAACTACTACTTGTTACTACAATTTAGTACCACCACCTTCATAACATATAACTGGCATTTCATAactggatggcggcgttagtatc	CTTCCCAAGATGCAGCAACGGTTTTTTTACTATTAGATGGAATATCAAAATCTTCGTCGTCCCAACTCATcgactatttatatttgtatg	GCACAAGTACACGAAAAGTCTA	TGCTCTAATTCTTTTCTTTTGGCGT
GELC0195	C6_00550W_A	TTTTTTGTAAGGAAAAGGACTCTCCACCAATAGACTTCAACTACATAAATATATCAACTTTTTTAGCAAGactggatggcggcgttagtatc	TTCTGAAAATTGGTCTTACTTTTGGTAATATCCCTGATTTACCTCCATATTTTAATACGTTTCTACCCATcgactatttatatttgtatg	ACCATACAGAGCATGCTACTAC	GCGTCTCTTTCTTCTTCGGGTA
GELC0196	CR_01370C_A	TTCTTCACCCCAAGAGAGTAATCGATACTTAACTGTTGGAGCATTACAAATTGGGAGTTCAGTAGCAGACactggatggcggcgttagtatc	ACGTGGATTCTCCAGCCTGACTAAGCAACAGACGACTTGTAGATAAAAAACGGGTAGTAAACTTGAACATcgactatttatatttgtatg	TCCCATAGCTGCTTAGATGTTT	TGACTTCATGTTGCTTCAAAGTGT
GELC0197	CR_00410W_A	TAGAAGTGTTGATTCTTAAAATCGCGTCCTTTCATACTTTCCAATCGGTCCAAGTGAATTACTGGATTACactggatggcggcgttagtatc	TATATGTTGGATTTGTCTGGAAGTAAATGGTTTCAAATTCACCATTTTGTAATATATCTGGAGGAAGCATcgactatttatatttgtatg	ATTTGCTGACATGGTGAAGATG	ACCGGACCAATTACTTTTCCAA
GELC0198	CR_03950W_A	AAAATTTTTTTTCAGCCCATGTCCAGTTTTATTTCTAAATCACTTTTGACTCAAAGAAACTTACCTTACGactggatggcggcgttagtatc	GCAGTATTCTTGGGTGAATGGCCAATCTTGGAAGAACAAATCGTTGTTGGGCTATCACAGATCTAAACATcgactatttatatttgtatg	AAAGAAGGTGGTGAGATTGGTA	CCAACTTGATATCTGTAGCTGCC
GELC0199	C6_02370C_A	TACAACCCTAACAAAAATATAAAACTCTCTATTCATTAACCGCAACCTTCACGAATAAATATTCATCCAAactggatggcggcgttagtatc	AAAAAGAAGAAGAAGAAGCAGCAGCAGCAGCAGCAATTCTTTCTCTAAGTATATTGGTTGCCCTTAACATcgactatttatatttgtatg	TTTTCATATTGGGTCGTGCATT	CAGCAATCAAAGTTGGAGCAGT
GELC0201	CR_10740W_A	TTTCGTCGTTTTTTTTTTTCTTTTTGTTATATCCCCTTTAAACTATCAGCACATACACACCAACACCATTactggatggcggcgttagtatc	CAAGCTGTTCGTTATCTGAATTTGAAATATCCTGTTCTGTCACTACCGTAGCTTGTTTCTTTGGGGCCATcgactatttatatttgtatg	CAAATCTTTGCACTCTCCTTGT	TCCATGCCCGGATCTTGTTTTA
GELC0202	C4_06740C_A	GAACTTATCCATACCTAATTTAATTTAGAACTCATTAGCAACCACTCCCTTTTTTTTCACTTTATAAAATactggatggcggcgttagtatc	CTGTAGAACTTCCAGTTATCGATTTAAATTCGTCGACTTTCTCTTTGTGGTCTGAAGACAAAGAATCCATcgactatttatatttgtatg	AGGAAAATTATGGCCGAGAAGA	ATCAGGCGTTTCATTTTGGTGG
GELC0203	C4_03200C_A	GAGCAAGCAAAACGCATATCTCACCACACACCAATTGTAGGCTATTCTCAACCGGAAAGTACAACTAGCAactggatggcggcgttagtatc	TTAAAGTTGGTTTGGCTTTTAAAATGTTGGCCCATTTATAAATGCACTCTTTTGTAATTGGGGTGATCATcgactatttatatttgtatg	TGATACGGACATACTTAGCACA	TAGTTGTCATACCCGTCACTGC
GELC0204	C4_05020W_A	CGTACGATATAACCAAAGTATACATATTCAATTTATATTTATTTACCTGTCAAAAAAACACCTTATTATCactggatggcggcgttagtatc	ATTGAAATAATTGGAATTCCGGTTTAGGAGTCTTTATATGGATTTTTGATAATATACTACTTGGTCTCATcgactatttatatttgtatg	CAGTTGATTGGAGTTTAGACGG	CCTGCAGTTGAATTAATGGTTAA
GELC0205	C3_01850W_A	AAAAAAAAAAAAATTTTCAATTACTATCGAATAACCTCATACCTTTAACCATCACAAGCTTCACGGAATTactggatggcggcgttagtatc	TTTTATTCACCGGTAAAGAAAAAGATGTCGATATAGACCTAGTGAATATAAGTGAGGATCTTCTAATCATcgactatttatatttgtatg	TGTAACGACTATCAAAGCAACAG	CCATTGTCACTGGTACTACTGGT
GELC0206	C7_03000C_A	AGAACCAGACAGTATAATGAAATCTTAATTATTGGTATAAGAGGTTCCATTAATATTCTTTCAACTAATTactggatggcggcgttagtatc	CTACCGAATATAACCTGGTAGCATTAACCCAACTAATGAGTCTTATTGTCTTTGACACCGATCTGAACATcgactatttatatttgtatg	ACCAAAACCGAGAAAGCAAATA	AGATCCCAAAGTCACGACATCA
GELC0207	CR_05100W_A	ATCACTAAATATTACCAACATAGAGCTTACTCTACACAACCCCCACATACTTTTTTTTAAAAAGCAGTCAactggatggcggcgttagtatc	TTTTTATTGGATCTTCAAATGTTTTTAGTCGATGATCTCGGTAAATCATCTCATGGTTGATATTTGCCATcgactatttatatttgtatg	TCTGGCCATGTCAAACCATTA	TTGGCAATTAAACTCATGGGAC
GELC0208	CR_06940W_A	CGCCCATACAAACACAAGTGTTGCCAACACATACAACTTTACAAAATTCCATTTTTATACAACACCAATAactggatggcggcgttagtatc	GAAATATTTTCTGTTCAATATCTTTTAAATATAATTCTTGATCTTCTAATTGTTGTTCAATCGATGGCATcgactatttatatttgtatg	TATGGAATTGCTTTGCCTGATT	TCCCCAAATACGTTTCAATTTCT
GELC0209	C4_03330W_A	ATACAAATTATATTATAAATTTCGATATCAATTTCAAAGATAAGAAAAAACAAACCCCTAGCCGTTACAAactggatggcggcgttagtatc	ACAAAATATTGGCAGCTCCTTTAGCAAAATATTCCCAATCTTCTGGTGAAGTGATCTTTGAAATCTCCATcgactatttatatttgtatg	GCTCTTTTCTATTTGTTGTTTTCTTC	TCAACATCAACTTATTTCCTTGACT
GELC0210	C3_03090W_A	AAATTGGTTGCTGTTATTATTTGTTTTTAAGAATATTTGTTCATAATTTGTTTCATACTTGTTTCAACAAactggatggcggcgttagtatc	TCGATCTTGTTTGCTCTTTTGAAGATTTCGTGTTCATATTCAAGTTCTTGGTGTATGATGGTGTTGTCATcgactatttatatttgtatg	GTGTCGATTGTTGTACCACTTT	AGAAGAAGAAGAAGCTATAGTGGC
GELC0211	C6_00790C_A	ATATTATCAACACCACTAATTAGATATATTTTCTTCATTTATCAGTCAACACCACATTTAACCTTACATTactggatggcggcgttagtatc	CCGACGTTACCATTGATGTGGCTGAATCACTCATATGCATATGACCTTCGTGTCTTTTTAAGAATTCCATcgactatttatatttgtatg	TGAGCAAATATTCTTTGACCCT	TGGTGCTAGCTCTTAAATCTTTGA
GELC0212	C2_10090C_A	TTTTTTTTAGTCTTCTTCTCTTGAGATGACCTACACCAAGAAGTTAGATATTCCCCCCTTCCCTGCTTAAactggatggcggcgttagtatc	CATAAAATGTAGTTGTTTGATGAAAGTTACGACTCCAAATAGGTCGTATATGTTGACTGGATCGTAACATcgactatttatatttgtatg	ACAGTCTGTTTAATATTAGATGGAGT	TGGGATCTCTAAATGTTACTGAATCA
GELC0213	C5_01480W_A	GATTGGCATTTTGTTCTTTCACATAGTTTTTATTTCTAGTTAACAACCTATCAAATACACCTCCACAACAactggatggcggcgttagtatc	GAGACTTGGCTTCTCGACGATCTATAAATTTCTTTTTTGATTTAAATGAATTTTTATTATTTGGATGCATcgactatttatatttgtatg	CATCACAATAGTACAAATAGATATAGACCA	TGGCTGCACGTTCTTCAAAATT
GELC0214	C5_02780W_A	CAATTCCAAACAAAACAAATCCTTAATTGCCTAGCCCAACCCAACCCAACCCAATCTAACTATCTAAAAAactggatggcggcgttagtatc	GTTGATTATCTAAGGAGTATAAGATTTTAATTTGCATCAGCCTGACGGATGATGAATCTTCTGTGGCCATcgactatttatatttgtatg	CAGAATACCCATCGAGCAAAG	TGGCTACAAAAGGTTCATCTGGT
GELC0215	C4_01150W_A	ACCACAACAAATCAGAAAACAACAACAACATCATCATATCAACATTAACCAACTTTCTGCTGCATCAAATactggatggcggcgttagtatc	ATTCAGGTAATGTTGCATCAATAGCAGATTTCCTCCGTGATGAAGTTGGTGCAATTGAATATCTCTTCATcgactatttatatttgtatg	TTTAAGGGATGCTGGTGGTATT	TCCAAAACCCAGTATTTTCCCA
GELC0216	C7_00730W_A	TAATATCAAAAAAAGAAACATTTCCTTTACCAATTAGTTCTTATTCAAGCATTGATTTATATTTATCAGGactggatggcggcgttagtatc	CTGTTGATGGAACAGTGTTGGAGAAATCAAGATTTAAGGTCAGTAAATAATCTATTGGTTCAAAGTTCATcgactatttatatttgtatg	GAATTGGGAATGTGAATACTGCA	AGGACGAGAAACAGATTTTGGT
GELC0218	C3_02670W_A	AAATCGAATAGAAAACAAAAAATTGTCTTGCAAGATCTAATTATTCTAATACAACCAAGCAGCTTTTAAAactggatggcggcgttagtatc	CAAGCTCTGGTTCTTTTGGTGTCTCATTAGGTAAATGTGTAGGTAAGTCAAATATAAACAGGTTGTCCATcgactatttatatttgtatg	ACTTTTCCCAGTGATCTTTGTG	TGTGGGCCAATTTCGTTTTCTT
GELC0219	CR_07350W_A	CAAGCGAGTACATAAAAAGTCTTGTTGTGATGAAAAAAAAGAACACCGTACAGTTTCCTCTTTAACAAGGactggatggcggcgttagtatc	TTGACGTTAGCAATTGAATAGTATAAACGTATAAGTTGGCATCCACCGTTTCGTATATCAGGTCGTTCATcgactatttatatttgtatg	GATGCTGTTTTCTTCTGCTGTA	CGGTGGATTCAATTTCACTCTGT
GELC0220	C5_03410C_A	CAAACATCTGTTGGTTTATTCATCGAAAAAGCTATAATTTGAGTCTCCACACATTCCGTTTACACACATCactggatggcggcgttagtatc	ATTTGTTTTTAGGTATTGGTTCGTATGGAATAGATTTTGTTGAAACTCTGCGTATCGAAGTTCTAATCATcgactatttatatttgtatg	TATATACGATTACTGGGGCTGC	TTTCGTGAGGGGCATTGATTTG
GELC0221	C6_01960W_A	GTTAAAAAAATTCCTTCAATACTACGTGTTCGTCGCCTTTTTACCATACCCAAATACAATCTTCCATAAAactggatggcggcgttagtatc	AGACTGGCGGAATCGAAGATAATGCATTTGTGGTGCGAATATGCTTCAACAACTTCTTGTTGCTTGTCATcgactatttatatttgtatg	GGGTAATCTGCGAAATCTCATG	AACACCACCAACGCTATAGTCC
GELC0222	C5_04030W_A	TTTGCATATCAAATTATATTTATTTCATTTCATTTCAATATTACTTTATTAATTTATTTTATTTTGCATAactggatggcggcgttagtatc	CTTTAGCCTTTTCAGTTAACATTCTAGTACGTTTAGACTTACGTATATGTTGTTGTTGTTGTTGTGACATcgactatttatatttgtatg	CCCATACAATTCGGACTAGAGA	TTCAACGGGGTCAATCTTATCC
GELC0223	C7_01370W_A	AAGGCAAATTAAATTAAATTAAATTAAATTAAATTTCTTGTAAATAAAAGATATCCTTCAAGTTTATACTactggatggcggcgttagtatc	GTTTATTTGATAACTGTTTATAAATATCAAATAATAGTCGTATAGATTTGGGTATTTGTTGATATTTCATcgactatttatatttgtatg	TGAAGATGAAGATGAAGATGAAGA	TGGTCAGAGATAATTCATAATCACCA
GELC0224	C2_04370W_A	TTGGAAAATATCTTCATCTTACTACACCAAGAAGAAAGACTACACCAGTTAATTCAAGAATATAAAAAATactggatggcggcgttagtatc	TGTCAATGATTTGACTATATTCTTGAATAGAATCTTTTAATTCAGAATCCACTACTATAACAGATGACATcgactatttatatttgtatg	TAAACGGCCTAACTATGTGTCT	TGTTGGTTCAAATTCCTTTTCAGT
GELC0225	C4_04600C_A	GGGCGCCCAATTGTTGTAAACACCAAACACAACAAGATTGGACGAACGTTAGAGAATATAAAATAGAAGAactggatggcggcgttagtatc	TTGACAAATCAGACGTGTAATTGTCTTCTAGAACACCCAATACCTGCTGACGGTCTGTTTTGGTTGACATcgactatttatatttgtatg	GATCTGTATCTTGTGCCGTAGA	GGTTGCTCACTCTGCGTTTAAG
GELC0226	C5_01530C_A	CCACACAGTGTTCAATACACATCATTGCAGGTGAATGCATTTTATAGAGAACTGGAGGTATATGTAAATAactggatggcggcgttagtatc	ACATTGAAGTTGTAGCTGTTGAAGACGACGAATTACGCGACGCCGAAATGTAATTTTCCGATAAATTCATcgactatttatatttgtatg	CTACGGCTCAAAGTGCTTAAAT	GTGTTGTCTCTCTTGTTGTCGC
GELC0227	C6_02840C_A	GAGAGGCACCTCCCCCCAAAAAACAAGCAAAAGATACGGACTTTGAGATTAAATAGAAACACAATCTATCactggatggcggcgttagtatc	GTTGTTTCTGTTTAAGTGATGCTGAATTAGTTGGGATATTTAAATCACTTTGGTTCTTATTAGATGACATcgactatttatatttgtatg	AGAGATTTCCTAACCAATTCCCA	CTATGATGAAGGGCAGTGTTGG
GELC0228	C6_03220W_A	ATCTAAACAAACACGAAATACACCAAAAAGTTAAACATCTCACATTTTTAGGTGATTCGATGAATTAAACactggatggcggcgttagtatc	TTTGTGTATTTTTCAATTCATGGTCTAACTCATTCAATAAATCATCGTCATCTTCTGCTTCAATATTCATcgactatttatatttgtatg	GATGACGTGCTTTATCTGATACT	CGTGGGTTGAATCGAAGTAACG
GELC0229	C3_01800C_A	GACCATAGTTCCTGAATAATATTATCAATTTAAACTTCCTCGTTGTTATCTTTAATTCATTCGCCAACCAactggatggcggcgttagtatc	ATGAAGATGGTGGTGACAAAGATGGTGTTGCAGTAGCCGGGTTGGTTTGAATTTCAACTTTGCTGGACATcgactatttatatttgtatg	TCACTTTTGATTAACATCTGACACA	TGGAGGTGTTGTAGATGCAGAG
GELC0230	C6_01000C_A	AAATATACAAAACTGCTGTGAAAAATTTTAAAAACCAAGCCTAAGCTCCTATATCTGAAAAGTATCTTCCactggatggcggcgttagtatc	GAGATCGAAAGCGTTTTACCAGGTATTTCCTTACCTGAGGTAATGATCTTAATATCCTTGTTTCTAGCATcgactatttatatttgtatg	CTGAAACATGTCTGATTTGGAGT	ACCACGAGATCTGATACTTCTTCTG
GELC0231	C3_06740W_A	ATATAGGAAACGAGTTGGGGAAATCAATCAACTAGCTCTGAGTGTCATATCAATTCTTTAGTACTTGGAAactggatggcggcgttagtatc	TCGACGAATAAGATCGGAGAGATTTGGATAGCGTTATAACATGCTTGTTGGCTCTAAATATTCCCAGCATcgactatttatatttgtatg	GCTGTGAACATTACTGATAGCA	TCATCACGAGAATTATTGCTGCT
GELC0232	CR_00050W_A	TTGTTCTGGAATTCTGGGTGTAAACAAAATTTTTTTTTTTTTTTTTTCCTAAATCAACACACCTCTCTACactggatggcggcgttagtatc	TGTTGGATGCTGTGAATGTCACTTTTTCAGTGGGATTATTGTTCATAGTTTGGGTAACAGTGGAAGACATcgactatttatatttgtatg	CTTTGTCCGCACTAACATGTAA	TAAGCAAACTGGTCTGGGAACT
GELC0233	C3_05950W_A	GAGACAAACACAGATCTATTCAAAAACTCCATTCACTGGCAAGTACAGAACTACAAATATCAACGACTACactggatggcggcgttagtatc	CATGAACAGTATATACAAATTTACAACACCTTAGTAGAGGGCGTTGTGTCAAAGTATAACGGTAAAACATcgactatttatatttgtatg	CATTGAATGTTTGCTGTAACTCA	CGGCTATTTTCTGTTGTGGTGT
GELC0234	CR_03350C_A	TCGAGTTTTTTTTTTCCAACAATCAATCAAAGAAGTAAACTATATAAACCAAAAAGTGTTTTCCAGGAAAactggatggcggcgttagtatc	AAATGGGTCTGCTAAAAAGTGAAACTGCTTTTGAAACCAGTCGACCCAAGCATTTTCCTCTTACTATCATcgactatttatatttgtatg	GATCTTTCTCGATGCTGCTTTT	TCTTGCAAGCTCTGAGGTGAAT
GELC0235	CR_08470W_A	ATTATCAAAGATCAACCTTTGAAGTTTAACCCCCTTCTGAACTCCTTCATATACATGTATACAAATAATTactggatggcggcgttagtatc	GGTGTGACTCTAAAGTATTTGAAAATCGCGACCCTAGTGACGACGAAAGCAATGTACTTATAAACACCATcgactatttatatttgtatg	TAAACACACCAAGAACACACAC	GCGGGGATGAGAAATTACTTGC
GELC0236	CR_08500W_A	CACATTATAATCCACCACGCCTTTCTAATTGAACCCAGTTATCCCTCCCTCCATATTGTTACATACACAAactggatggcggcgttagtatc	TCAAATTAGGATTGGATAATGGATCATGTCTGGACTTTTGAGTTTTCTTATTTCTTCTGTGCTTACCCATcgactatttatatttgtatg	ATATAAACGATCCTGGCCTGAA	TGGCATCATTCAAACAATACTGCA
GELC0239	C4_04220W_A	AGAAGAAATTAAAAAAATCATTTCCAATCCAAATTCTCCCCATTCGAAGTATAAACAAACCAACTAACACactggatggcggcgttagtatc	CTTCTCTACTAGTTGATACTGTTACTTTCGATGAAGAGTTTGTTTGAGGGGTGACTGGGGTGGATGACATcgactatttatatttgtatg	CGCCATGGAAATATTCTCTGTT	GGGTATCCATCCACTATTGTTGA
GELC0240	C4_04910C_A	CCTTTATTTTCTGTACCATCACTACTTACATTTATACTATTTGCCACATCAGATAAAACCCAGACCAGTTactggatggcggcgttagtatc	CGTCAAAATTCGTCGACTGAATCGATCTGAATGATTGTTGTAACTTTTCAAGAGGATCTGAAACTGTCATcgactatttatatttgtatg	AGTAAGGTAATCTGCTGTCTGG	TCCATAGATGCAGATTCCACAA
GELC0241	C6_02540C_A	ATTCATCTCAGTCTCGCCAATTTTTAGAAAAAGTTACAGCACCACCCATCATGATATTTTGGCCAACTAGactggatggcggcgttagtatc	TATTTATGACTGGCTTATGCAATATAATACCTTTGGCATTTGGTCTGAAAGTGAATTTAGGCTTGTACATcgactatttatatttgtatg	TAGTTTTCAAGCAATCGGATGG	TTCAAAATAGCCTCCCGTTTG
GELC0242	C6_03200W_A	ATCACAACAATAACACGATTTTTTTTTTCATTAACCACAACATCATTATCATTCACAAACCTTACATATAactggatggcggcgttagtatc	GTACTCTGGGAAATGTCAATTTTGGGATAATTGATATACGGCATCTTGCCAGTACCAAAACGAACTTCATcgactatttatatttgtatg	CAGACCACCCAATATTTTCCAC	ACCATCTAAATAAAACTCTGTTGGA
GELC0244	C3_06880W_A	AGATTTTGAAACTGATTTTTTTTTTTCAAATATAAACAAACCACATCTTTCTTTTGACTTCCTATTACCAactggatggcggcgttagtatc	ATGAATTGGATTTATAGATCTTAAATGTTTGATTTATTATCAACGACGATATATCTCTATCCTGGGACATcgactatttatatttgtatg	TCTGCTTGAAGTAAAACCAGAC	ACTGTGAATGCTCTTCAATTGA
GELC0247	CR_02600W_A	CAAAAAAAAAAATACGCATCAACAGGTCTGAAACCAATCTCTAGATGAACACTCCCAAATATCTCTTGCAactggatggcggcgttagtatc	GACATGAAAATCCAATGGTATTTGCAAAATATTTCAGAATAGTTTTCGATAATTTCCCTTTATTTGTCATcgactatttatatttgtatg	TTGGGTAGATTAAAGTCATCATCA	AAACCAAGATTCATCACGACAGG
GELC0249	C4_01720C_A	CTTCAAAGAAAAAAAAAAACAAGGATCACATTTCATAAACACACATATATATATATATAATCAAGAAACCactggatggcggcgttagtatc	TGCTATTACTATTGTTACCATTATTGAATCGTTTCAGTTGATTCTTATATGTTTTTCGATACGTTGACATcgactatttatatttgtatg	ACATTCTTAAACTTGCTCACGT	CGAATCGGTTGTGTCGTCTTTA
GELC0250	CR_04330W_A	AATACGAAGTAAAACAACGTAAACATTCAACAAAAAATCAAACCAGGAAAAGAAGCCATTTTTTGAGAGTactggatggcggcgttagtatc	CCTCCTGCAATACTTGAAGTAGCTCATTCCTTGTTCTGTAATGTCTTGCAATGCTTTCATATTCGACCATcgactatttatatttgtatg	TCTTTGTGACCGTCGTACTTAA	ACTCATGGACCTGTTCACTGTG
GELC0251	C7_03210W_A	GAGCTACAATACACGCAATTTGAGATGACCATTGGATCACTCCATCGTTGTCTTTTCATTAACTTCAATTactggatggcggcgttagtatc	TGTTAATTAACAATAAGGCTTTATCCAACGGTAGTTTTGTTACTACTGGCTTATTAGTATCTTTACCCATcgactatttatatttgtatg	CAATGATCGTCAACACAACTGT	GTTCCACCTTTGTTATTTTGGCT
GELC0252	CR_07390C_A	TTTATTTCAAGCCCAAGTCGTTGAAATATTTATAGACCTTTCTCTTTTAATCAACCCTATCACCACAAAGactggatggcggcgttagtatc	CACACAAGTTTTTATATATCATTTTCTTGTGGGAGGCAACATTTTTTTGAATAGTGAATACCTTGGGCATcgactatttatatttgtatg	TCTGAGCCATATAAGACAATCACA	TCCACACTCTACTCTGTCTGGT
GELC0254	CR_02440W_A	GGATAGATCTGAGCTACAGCTCAACGACATAATAGAAATCAGCTCTAGGATGCATATTTTTATTGCTCCGactggatggcggcgttagtatc	TATATCTTTGCTCTCTAGTGGAAGAAGGTTGTTGATTTGTTAAACTTTTTGATCCAGTTTCTGACTGCATcgactatttatatttgtatg	ACGAGCAAATGGTAAACAAACA	CTGACTACCTCTGTTACGACCG
GELC0255	C4_02370C_A	TTTTCTTTTTCTTTTCTTCACCAACTTTTATACATTCGCTTTATATATCCTAACAATTACTTTATTAAAAactggatggcggcgttagtatc	TGGAGTTAGCGTAAGTGGCTAAAGCGGAACCAGCAACAGCGGATAAGATGATAGCGGATGAGAATTGCATcgactatttatatttgtatg	GGTTTCTCTGTTTTCTCTTCTCG	CAGCACCTTCAGCAGTAGAAAC
GELC0256	CR_00810W_A	AGAAAACTTTAATCACCAACTTTGATCAATATTAATCAACAACAACAACAATAAGTCATCTCTAATAACAactggatggcggcgttagtatc	CTAGTTTTGAGTCTTCGGCTTTTTGCATGAACTTCATGTTCATGACTCGATTTGATAACCCTGTCGACATcgactatttatatttgtatg	CTGGCGATAATAGTTTTGTTCCA	ACCCCAAGATCGTTTTGTAGTTG
GELC0257	CR_09970W_A	CCCCTCTATTATAAATTTAATCAAATCAACTTGTATACATATAATTCAATATAACTATTGCTTTTAAATCactggatggcggcgttagtatc	ATCCTCACAATCTGGAACACACATACCTTCCTAAGTCAGATAATTCTTTGTTAATACGTTTTAATGACATcgactatttatatttgtatg	TCGTTTGCTCACTAAAAGTCAA	TCCGTTCAGTTCGTAATAGTCTGT
GELC0259	C1_07390W_A	CCAACCAAATATACATATCATTAGACAACCACTATTCAGTTTCTACTCCGCTCCAAAAAAAACTTAAATCactggatggcggcgttagtatc	AAAACTGTTTGGCAACAGATTCATCTTCTAAGCCTGTAACAGCAAGAAAAGTGGGTATACTTTCATCCATcgactatttatatttgtatg	TTTCAGTACACTAACCAACAGG	TCGGCTTCACGGACATTATCAT
GELC0260	C2_06150C_A	TTCAACAGTGTTGATTTTCAATTCTTTACCCTATCCCTAAAACGTACAGTATTATATTAAAGAAACAAAAactggatggcggcgttagtatc	ATGTCAAAAAGTCACCATTCCTCATATACTCAGAGTTGTCAATGGCAATCATAGTAGCCTCAAGAACCATcgactatttatatttgtatg	TATATGAGCAGTTCTTGGACGT	CAATGCTGCTACTTGGATTCCG
GELC0263	C1_03990W_A	ATTATTATTAGATTTTTCTAAACTTCCAACTTGACAACAAACAACAAACAGACGACACACAAATTTCAATactggatggcggcgttagtatc	TTAATCCTTGTTCATCTTGATTTGGTCGTTGAGATTTATCAATAAATAAATTGGTTACCCCTGATGACATcgactatttatatttgtatg	AGTTAAATTCCGATCCACACAC	GTACCACCACCACCACCATTAT
GELC0264	C2_03760C_A	AAATTTACTCCCTAAATTTGTTTTTTTTACAACCAATATTCAGCTTTTTTCTATATGAAGATCAATTATTactggatggcggcgttagtatc	TTTCAAATTTGGAATCTGCAAGTAGGTTCACTGTAGATACCTTTGGTTTTGATTTCAAGGGAATATCCATcgactatttatatttgtatg	TGAGTGGGGTGTTGCATATATT	TCTATGTCCAGTTTCAGGGTCA
GELC0266	C2_09980W_A	CGACATCACGTTTTCTTTATATACTCTTAACTGTTTATCATCATTCCATCAAATTCTGGTATCATACAATactggatggcggcgttagtatc	TAGGATATATCTCATTTATATATTGAGATACCAAATAAAAAGTCAATTGGAAATAATTGTTAATAGTCATcgactatttatatttgtatg	TGACTTGGCGTTGCTATAACTA	AGCATCAATAGGGAATTTAACGGT
GELC0267	C4_03770W_A	AATACTTGAATTTGTCTCCAAAATTGAATTTTAACAATTTTCCCATTCAATCTTCCTTCCAGTTTATTCAactggatggcggcgttagtatc	ATTGTGATATATCTTGAATGGCAGTTTTAAATTCTTCTAATGTTAAAGTAGGAAATTGTGTTGATGACATcgactatttatatttgtatg	TGAATTGATATGGTAGCACTGTG	ACTTTCAATTCGAGCTATTTGTTCT
GELC0268	C2_10600W_A	TGGTCGATGAAACTGTTAACGTTTGATGAGTTTGTTTTTTATCGTTTAGTTAGTTAGTTAGTATTGTTTTactggatggcggcgttagtatc	TCACGGGATTTATGGCAGCTGCAAATCTACACGACCTGATCAACACGGGAACACATATAACATTAAACATcgactatttatatttgtatg	TCATCAGTAAATTCAACGGCAC	CTTGAACGAAGGGAGATGAGGT
GELC0269	CR_03290C_A	TTTACTGATAATCAATCAAGAAAATATTCTTTAACAGGGTTGGGTTCAGTTGTTACGGTCAACTACACCAactggatggcggcgttagtatc	GATACGAATGTACAGTTAGATGCTTGGGTGGGGAATCATAATCAAGTGGGAAAGAATGGTGTCGTGACATcgactatttatatttgtatg	AACAACACACACTTTCAACAGA	AGCTGATACTGGATGTCGTCAA
GELC0270	C2_01110C_A	TGCCCACAAATAAATTGTGATACCGGTCTTTTAGCATATATCTTCTACTCTTCAATCAACATCTTTACCAactggatggcggcgttagtatc	TTTTGGAAATTATTTCTTTCTGTAACTGCGACAATTCATCAGATATGAATTGCTGTTGAGGATTAGACATcgactatttatatttgtatg	TCGCAATTTTAAACAAACAAGCT	TCGTCGTGATTCAGATGTGGAT
GELC0271	C3_02260C_A	GGTTTTTTTTTCATCAAAGTCATTATTTTCCCATCATATTCATCAACAACAACAACAACAATATCCCCCAactggatggcggcgttagtatc	AAGATGATCGACTTTGATAACCACCACGTTGTGGGTTTCTAGGGCCTCTTGGTCTATATCTATCTGACATcgactatttatatttgtatg	GCACTACTACTCACCACACTTA	CCTTTGGGTGATGGATGCAGAG
GELC0272	C2_04930C_A	ATACACAATTATAGTCATTTATATATCTACTTAGTGGGTGGTTTTTTTTTTAAAAAAAAAAAAAGAAAATactggatggcggcgttagtatc	GTACGCTCGGTGTATCGTATTGCCTTTGATCATTTGACCTCGGCACATGATGGCCAGCAATAACAGACATcgactatttatatttgtatg	TGATTGTGAAGTGACTTTGCAA	ATTTCTCGCATGGCAGTGATTG
GELC0273	C6_01190C_A	AAGAAAACTAATCAAAGGCTCCTCCTCAAATAGTTCTGTGATACTACATAATTATCTATCAATCCACTAAactggatggcggcgttagtatc	GTGCATCCACATATGATGACACAGCAACAGTTGGTGCTGATGGTGCCAATAGTGATAATTTCTGTCCCATcgactatttatatttgtatg	CCAAGCAGAGCCAAAATAGAAA	TCAATCAATCTGTGCCACGGTA
GELC0274	C1_00780C_A	CAAACCAATACCCAACACTTTAATATCTAGGGTTTCCATTCACATATACACATATAAACATATATTAATAactggatggcggcgttagtatc	ATGGATGTTGTTGTTGTTGTTTTTGTTGTGAAATTGATTTTGGAGTTAATGGTTTAGTTATATTTATCATcgactatttatatttgtatg	GTTCTGGTCCCACTACTTACAT	TGGTGAAAGTTAAATATGGTTGTTGT
GELC0275	C2_04980C_A	TATTCCTCAATTAATCCATATTATATATCCATATATATTTATACACACATATCAATAATTATTATTAGTAactggatggcggcgttagtatc	TAGGTTTATTTTCATTCACGTCAGCATAGACTCTGGCTATTGAGTATGGTCTTGATTTTGAGCTAATCATcgactatttatatttgtatg	TTGCTTTTCTTCTTCTTCTGCC	GGTCCTCCAGTTAAATTTTGTAAT
GELC0276	C6_02160W_A	AATTTGGAAAACATAACTTTTCTTGTTTTATAGTAGTACTGAAATAGTTCAACCTAACCTCATCATACTAactggatggcggcgttagtatc	CAAATCCACCCCGACCAACTTCTTCATATACTTCTAATTCTTCACTTGAATTGACTCTAGTATAATTCATcgactatttatatttgtatg	GGGCACACGACATTAATAAGAA	ACCATCAATAAATTCCATAATCACCCA
GELC0277	C4_05030C_A	CACAACTACTACTGCTAATAGTTCAATTGGAAAAGGGCCCAATTAATTTACAATTTATAATTATCTTATAactggatggcggcgttagtatc	TGTCATTATTTTTTTGATTAATCAAAGTAGAATCCAGATTAGATTCATTGGTTGGAGGAATATCTGACATcgactatttatatttgtatg	AGATACCGAGTTACTCTTAGCT	AGATGGTCGTTTATCACTGTCTGA
GELC0278	C6_00350W_A	TAATTCATATTCAAGAGACACCGGATTAGTACCCACTTTCAGATTGAACTTAACTTTTTGGAATAAGAACactggatggcggcgttagtatc	TCTGTTGCTGCTGAGTACTCCGATTTGACGGCTGGATAGATAAGTTCTGTAGATGTTCTAACCCTGACATcgactatttatatttgtatg	ACTCGACAACAACAATCTTAGC	TCTCTTTCACTATATGTCGTTTCGA
GELC0279	CR_05940W_A	TTTATTAACTATAACAATTTACATTTTTTTTTATTTTCCATAAAGCCAAAGCTGTGACTTTTAATAAGAAactggatggcggcgttagtatc	GCACTTTAAAGTTTTGAGATATGTTGAATACTACTTGGCGAGTTTGAGTGGGGCCAGTAGATTTCTTCATcgactatttatatttgtatg	TTTGCGTTTCAGTACTTTCCTT	TGTCGTGGTTCTTGAATTTTGT
GELC0280	C2_04260W_A	TCTCTCACTTTACTTAAAATCAATTCTATTCGTCATTAAGAAAATTACATATAGAAAACCCAATGCAAATactggatggcggcgttagtatc	TTGTTGTTTGTGATGGTTGAGATATCCCAACATTATTAAGTTTTCTAAATGAAGCTGAACTATAACTCATcgactatttatatttgtatg	TTCGCAGTTTAGTTGGTTCTTC	TTTCCCATAAGTACCAGCAGCA
GELC0281	C1_13470W_A	CTTACTTATACCATTTGTTAATACCTGATACCTCCCCATTTTCCCTCGCACCAAGAAACCCCAAATCACAactggatggcggcgttagtatc	CTGTGTCATTAGAAACACTCGAATGTCCATCAGTACTTAAAACTCTTGGTCTCTTTCTATTACTAATCATcgactatttatatttgtatg	TAATCAACCAACGTGTTCTTCC	TGGGAAACTTGAATTACTTGAATCAGT
GELC0282	CR_03900W_A	ATTAATAATAAAATTATAATAACAGGTTTGCTTGTTCATTGTTTTTGCTCATTCATACTCCACCTCAACAactggatggcggcgttagtatc	GTGAAGGCACTGGTGGTAAATCCTTATGCTTTGTAGCTTCTTGTGTATCTATACGAGTTGTTCTTGTCATcgactatttatatttgtatg	AGAGAACAAGGCGTACATAGAA	GTCGTAAAGAAGTCGGCTCCTT
GELC0283	C2_03770C_A	TTTAAAGATCATATAGAAAACCTAATACATTAGTTCGTGTGTATATGGTACTCAAATCTAACAAACAGTCactggatggcggcgttagtatc	GTTTTAATTCCTTTGCATCATTTCGATCTATTCGGGTTATGTTTTCTGTAGAATCATTAATCTCTGTCATcgactatttatatttgtatg	AATACACCACCACGAAAAGTTG	AGTTCCTTCAAATTTTCAGCCTTCA
GELC0284	C2_10260C_A	ATTTAAAACCCATCCATAGATACATCAATTAGTTATTACCCACTTCTTGTATCAATCCCTTTACTTAACAactggatggcggcgttagtatc	CACTTAATCGATTAAAGATTTTTTTGAATTGATGTCCTTCAACTGGATGAGAATGATGATCAGTTGACATcgactatttatatttgtatg	GATCTTTTATCACGTGCCAACT	TCTCTAAATCCAACAATATGAGGGT
GELC0285	C3_06620W_A	GCTTACAGGAGTCTTTTTTTTCTATTAATTTCATTTTTTTTAAAGACAATATTATCTATCAACATATCTTactggatggcggcgttagtatc	GTTGTTGTGCAGTGGGATTGTCTTCTATGAAAAACAGGAGTGATGGTGGTGGCGGCCGGTTTGAAGTCATcgactatttatatttgtatg	TCACTCACATACACACAGAACA	GGGATGACGTAAACAAGGGAGA
GELC0286	C3_00550C_A	TGCTTGTAAATATCATTTGACTTAGATCCTTTCTCCCCCTCCCTCCTGTTATTTGCTTTTTCCATTCATCactggatggcggcgttagtatc	ACAAGGACAATTCGTCATCTTTGTCGTGTTTATTTTTTCCAAATAGTTTGAGTTTATGTTTATCTGGCATcgactatttatatttgtatg	CCAATCATATAGCAACCATTCCC	GAAGGGTTACGATGGTTTGCAC
GELC0287	CR_10660W_A	CTTTTTGACTTTGCTAATTTCCTATCGCTATTCATTGCCACATAACAAACTTTTTAATAGCAATAGCACAactggatggcggcgttagtatc	GTTTGGTGGAAAGGACATCGGCATATACCCTTGAGACTGATTGCACTGTATTATGGCGGTGCGAGGACATcgactatttatatttgtatg	GTGTGTAAGTAGTAGGTCGTGT	GGGCCATCTACCAAGTTCTTCA
GELC0288	C3_04550C_A	AAAATACATATATAAATGTAGATTTTCCCCTAATTTTGGGTTTTCGCTTGTTCTCATCAACAAGCACACGactggatggcggcgttagtatc	TGTTGTTGGCAGTCGTTGTCTTGTTTCCAGTGGTTTCATCCCAAGGTGTAAACTTGCCTGTCTTGGTCATcgactatttatatttgtatg	TGAAACCAACAGCCTCCTATAA	TGAGTGACAAAAGATGACTATGAGA
GELC0289	C5_03310C_A	CTCATTTCATATTTAGATTTCCCTTATTTTTGCTGCTAACAATTAACTACTACACATCAACATCTTCATTactggatggcggcgttagtatc	GGATCATATCATGAGTGATTGGACCATTAAGAAATACTTTTAAAGCTTGTAAATCAATTGAAGAAACCATcgactatttatatttgtatg	TGATTTCGAGTTCTCCAGAGTC	ATGTTGCCATTAATGTACCAGT
GELC0290	C1_06780W_A	TTCAAAAAGAATTGTGCCACTCGATTTCCTAGTTATCCATAGTCTTTTACAAATTTGAAATTTTAGCATTactggatggcggcgttagtatc	GTTGCTGTTGCTGCTGTGGTTGTTGTGGCAGTTGACTTTGCTGCAGTGTATTTTCAATATCGGTTGACATcgactatttatatttgtatg	ACCGCCGATATTCTATAACCAA	AGTGATTCCAGGTGATTTAGCA
GELC0291	C3_00790W_A	TAGTTTAAATTAATACTTGAAATTATAGAAGAAAGAGAATACATATACAACGACAGTACCCTGGCTAATAactggatggcggcgttagtatc	TATATCTATGATTAATTATTTTCCGGTTCGATTTGGGATCTAGTACAATTGCTAATTTATTTGTATCCATcgactatttatatttgtatg	TTCAATTTCAACTTGGCATCCA	TCTCACGTTTAATCTTCATGCTGA
GELC0292	C5_02560C_A	ATTGCTGTTGATGGGATAGGGTGGGGTTGGAAGAAGATAGCTTATACACTTCACATTAAATTCACACCATactggatggcggcgttagtatc	AACGATGGAAATATATTGATTTGACCAGTTTCTTTGGCCGATTCATATAAATCAATGATTGTCTAAACATcgactatttatatttgtatg	CCAACATCATTTGCAGTAACCA	TATAGTAAGCCGTTCCCAACCC
GELC0293	CR_02040W_A	ACAGCACTTCCCTGATATCACAAGAAGAAAGGTGTTGTTGTTCTATTTCTTAAAATCAAATTAGTTAATTactggatggcggcgttagtatc	TAGAAACTTTATGTGATCCTACTGTTAATCGAGTACCTGCTTTATATGCATTTGGAGGTGGTTGTGGCATcgactatttatatttgtatg	ACTCATTCTAGCATCCCCTTTT	CCTAAACGGGAAGCATGAGAAT
GELC0294	C6_02190C_A	TATAATTTAGGATAAACTAATTTGGTTTTTTTTTTTTGCCGAGTCCTGTTAATAAACTACTACCCTAGCAactggatggcggcgttagtatc	GCGAGGAAGAATTTTCCACCACATCAGGTAAAGTATATTCATTTATAAAAGTTGACGATGATTGAGGCATcgactatttatatttgtatg	TGACATTTGATTTGTTTAGTTGGG	GTCCTAACCATTCACCATCTTTGT
GELC0295	C2_08270C_A	CAAACACCATCGCCCACACTCCCACACCCAGCAGTGATAAATTAACTTCTATCTATTCCCATTCCCATTCactggatggcggcgttagtatc	AATGTAATCCCACAACATTATTATTGTGGGAATTTTTACTACTACTGCTATGACTAGTTCCAAAATTCATcgactatttatatttgtatg	AAATTACAGACCAATCCCCACT	TGTACTCCTTCTTGACCAAAAT
GELC0296	C2_00300C_A	CCATTGATAAAACAAGAACGGAAAAAAAAAAAATTAAGATTAACATAGCTTTGCCGTGATATCAACTACAactggatggcggcgttagtatc	AATCGTGACCAAACAATTCACAAAACTGTTGTATCCAAGGTATATAGTCTTCTTCTGGATCGCTAGGCATcgactatttatatttgtatg	TCTCTTTTCACACACACTCAGT	TGCTGGTATTGGTGGTTGTATTG
GELC0297	C5_01490C_A	CATAAAATTCGTGATTTTTCAGTTCCCCCATTAACTTCATTCATTAAACTTGATTTTTAGTTCATTAAGGactggatggcggcgttagtatc	TATTTGGTATATAACCTATTTGTCTTCTCAATATACTAGACCCTGGCCCTAGTCTAACTAATCTTATCATcgactatttatatttgtatg	TAACAGGTGGGTATTTGTGTGA	AGTTGTCCCTAACCCAATAGCT
GELC0298	C1_04520C_A	AAACCACGAGCTTTTATCCAGAACTGAGCTTCATCCTCAACTTTTCATTAATATAACTTTTTGAACAATAactggatggcggcgttagtatc	AGATTCAAAGCAGATAAATCGAAATATTGGAAAAAAAAATTTCAACATACTGAGAAGACGAGCCGGTCATcgactatttatatttgtatg	CATTCATGTCTGCTTGTGTGA	TTCTCATGGTCCAATTCTTTCA
GELC0299	C5_05100C_A	CTTCATTTATCTACAAACAGAGTAATCAAAGCAGAAGCGAACACGACTTTTTTTTTATTAACTTACCACCactggatggcggcgttagtatc	GCAAAAATAAGTACAAATGTTTTACACGTTATATTCAATTTCAACATACCCTTTTCCTGATCAATGACATcgactatttatatttgtatg	TCTGATGATGAGTAACCGAATTG	TCACATGAACTACTACGTCCAA
GELC0300	C4_04460C_A	CTTGAAACAGACAACTTAGTTTAAAGATAATTGTGAAAGAAAAAAAAATTATCACAGACAATACTCAATTactggatggcggcgttagtatc	TATCTGGTATTGGAGGACATGATTGCCCCTTTTCAGTCGACAACTCTTGGTGCAGTAGAGATGTAGACATcgactatttatatttgtatg	GAACCACCAGCTTTAATCACAT	AACACCTCAGGCTGAACTACTG
GELC0301	C7_04110W_A	ACACAAAGTCAACTATAACATTTCATTTTTCAATCAGTCAAACTATCACTACTATATCACCTACCCAGACactggatggcggcgttagtatc	TAATTGATGGAGAGGATAAAGTGGGGAAGCAAGGCAAGCAAGTTCCAAAAATCGATAGTAATACATCCATcgactatttatatttgtatg	ATCATTAGACAACATCGGGGAT	GATTTGAATCGGTGGTAGTTCT
GELC0302	C7_03940C_A	ATTTTGGTGTTTTTATTTTTATCTTTTTTTTTGAACAACACGCTCATTTATTCCAGAGGTTCACAACATTactggatggcggcgttagtatc	TACTTTTGGCTCTAAGTCTTTGTTTTGTCAACTCATTTTCATCCGTTATGGATGATTTATAAGATCGCATcgactatttatatttgtatg	CGCTTCAAAGAGAGAGAGAGAA	CGAACTACTTGAGCTGTTTCTGT
GELC0303	C2_10750C_A	TCTCTATTTTTTTTTTTTGCTCAACTAATTTACATTTTCTCCAGCAACGCCACCACTACCACCACTACCAactggatggcggcgttagtatc	TGACAACAGTAACCTTGTGTTTTCCAACCTGGAGAACTGTGCCCTCTGGAAGTTTTGGAAGATGACCCATcgactatttatatttgtatg	CAATACATGTTTGGACGAGTTCA	TGCCATTTTCTAATCGTTCAGCA
GELC0304	C2_09230C_A	TATTTATTTAATTATTCATTTGTTTGTTTGATTTTTATTAACTTACTACTTTGGAGATATCGATATTGCCactggatggcggcgttagtatc	TAGTAGTATTTATATCATCCAAAGGTGCAGTTGCTGGCGCCTCCTGATTTGTAGATTTTGGACTGAGCATcgactatttatatttgtatg	AAAAGTGACTCAGCTTCTAGAA	GGGTTCTGACTGGGAAGATTGT
GELC0305	C7_02800W_A	AGCCCCCCCTTACATCAACAAAAAATTTTTCCTCTCTGTTGTTTATCTCGAGTTTCTCCCTCTCTCTCCAactggatggcggcgttagtatc	CAGGGTCGTTGAGTATTTCAAAAACAGAGGGCTGCATTGGTGATAACCGTGGTTTTTTAGTGGGGTTCATcgactatttatatttgtatg	GCAAATTGGATGTGGCAGATAT	TTTTGGACAAGTCTCCCATGGC
GELC0306	C2_07130C_A	TCATTAAACGAAACTGACCATGTTTGAGAATCTCAAAGCTTTTATTCGACATGGGAAGCAAGCCAATGATactggatggcggcgttagtatc	TTTCATTGGCAGTAGCAGTACTAAATGGTTGTTGATATTGCTGTGGCTGCTGTTGTTGCTTTCTTTTCATcgactatttatatttgtatg	CGTGTGTGTGAAGAGAGAAATT	TTGTTGTTGTTGTTGTTGGGGA
GELC0307	C1_04090C_A	CAAATTAGAAAACAAATACATACTGTAGAGTTTATCCGGATTATTTAAATAGATATAATAACTCAAAGTTactggatggcggcgttagtatc	TTTCCTTACTTGTACGAACAGAGGATGGATGGATACTTTTGAGGATGGATGGATACTTTTGAGAAAGCATcgactatttatatttgtatg	TCCTTTGATGCCTTGAAATTGG	GGTGTTAGTTCTCTCGATGCCA
GELC0308	C1_13610C_A	TACCTTCTATTCCTTCCCCTTTTTTCCACCTCAAACTCCATCACTGGATATATACTTCTATAAATTAATAactggatggcggcgttagtatc	CTGAACTATTTCCTTGACGCTTGTTCAGACCAGAACTATGGAAATTCCCTGTAGAAGTATTGTTTCCCATcgactatttatatttgtatg	TTGGTTTGGTTTGGTTTGGTAG	CTTTTGGCAGTGGTTGTAGTGG
GELC0309	C1_10010C_A	AAAGATAAATAACTACACAACAACCAACATTACAGCCAAAACCACATACCTGTGCAATATTTAAGCTCCAactggatggcggcgttagtatc	TGGGATTATTGTTGGCCATTGGTGTGCTACTGGTATCACCCGATACGTCTTGACACGGGTTTGAATCCATcgactatttatatttgtatg	TTGGGCTGACAGTAGAGTATTG	TGAAAGAGCGTGAAAACTGGTT
GELC0310	C6_03010W_A	CCTTTATACTATAATCATTTTTTTAGTAAACATCCGTACTACAATCGTGTTTGTAGATGTCTACGTAATCactggatggcggcgttagtatc	CGTCATTTCTTTCTTTTATTTTCGATGATTGTAATAATGCTATAGTTTTGTTAATATCTGACGTAGACATcgactatttatatttgtatg	CGCAAAATTGTTCCCAGAAGTA	TGTGCGGTATTTGAAATCGATT
GELC0311	C7_02990W_A	CATCGATAACGTCAATAACAGGAGGTCTGTTAGCTATGAAACTCAACGAATCAAACTACCGTTTCAAGCGactggatggcggcgttagtatc	AAGAAGAAGAATAAACTAGACTATCTGACGATATTCGTGGCTGTAAAGTATCTGTGCTTTGCAGTTTCATcgactatttatatttgtatg	TCAATTTCTTCACAAACTACAGCT	AATGTCAGACTGGATTGGCGAT
GELC0312	C2_04760W_A	AAAGGATAACTACAATATCTTCAAGACAATTACTAGACATTATTGAACATATTTTTCTTATTGTGGGTTGactggatggcggcgttagtatc	AAACAACACCAAATTTCCCTCTTCCAATAACTTCTGTACGTTTATATAATGATGTTGCATTCATTTGCATcgactatttatatttgtatg	GGGGACTTTTCTTCATTTGGTT	TCGTAATGATCCACCAGCACAA
GELC0313	C5_02670W_A	GTCAAGAATAGTTTTCAACCCACACACATTATATATAGAGAAACCCTAGTCAGTTCAACAGCTTTCTTATactggatggcggcgttagtatc	GTAATAAAAACTTGTCATCTTCAAATGACCTCGTTATGCTGTTGTTTGTCTTTGTGATGGTCGATGTCATcgactatttatatttgtatg	TAGCAAGCAAACTCATGAAACC	TGTTGCTGCTAAAATTGTTCTACCA
GELC0314	CR_07240C_A	GTTGTTCTTCAGTCCACTGACCCATCACCTATACCTCCTACCTCCTCCGACCCCAACCCACCCTTTTACAactggatggcggcgttagtatc	TTCCGTGGCAAGCCCATCCAATAAAGGAGGGCATGTCACTTATCTGGTACTCCTGATACTCCTTATCCATcgactatttatatttgtatg	AAACAGTTAATTCCATCCACGC	CGTAGCATCGTCATTCATCTTGT
GELC0315	C1_06680W_A	ATACTAATTAATTTTCTTTTTAACAAAATTACAAGAATCACAACTTTCTATTTCAAAAACAACAACGGGAactggatggcggcgttagtatc	TGGACAAACCAAAAGTAGTCGCTATCTTTGTTTTAGGTAGTGCGCTTTGTGGTTGTGAGAGTGTCGCCATcgactatttatatttgtatg	TAATTGTATTGTCGTGGTGGTG	CGCACCGGTGTACTGATTAGAT
GELC0316	C1_07380C_A	ACTACTACTACTATTACTATTAATAGCATAATAATTATTATTATTCCTATTATACCAATTTCACTTAGCAactggatggcggcgttagtatc	TTATATCATTAACTTTTAGATATCGATCTCGCAATAGTTCGCCCTTGTCATATCGTTCAAATTGTTCCATcgactatttatatttgtatg	ACAAACGAACTTACAAACGAACT	TCCCGTTATTTCTCATTTTCGCA
GELC0317	C1_07970C_A	ATATTATCATATTATCATATTCAATTCATTAGTCTGTTAATTCAGAACTTTCTTTTTCACCCTAAAAACAactggatggcggcgttagtatc	GTCGGGGCGAAGCAATAATCGACACTAGAAGTATTGATATTATATATGAAATGAAATAGAATAAATGCATcgactatttatatttgtatg	ACATAAGTGGGAGAGAGATCAA	ACGATTAACACAATGTAATGAGCCA
GELC0318	C1_10210C_A	CAGTTATATTACCTTCTTGTTACTTAATTATTAATTATTTGCTATATTATTGAATTGAATCCTCAAAAGAactggatggcggcgttagtatc	CAGCTGCCCCATTTGGTGGAGGTGGCGCACGTCTATGGTTTTTCAAATCTGATGTATAAATACTTGTCATcgactatttatatttgtatg	ATCAATTACTAATACTGTCAGGGAT	ACCTGATTGACGTTTGCTAGAA
GELC0319	C1_11400C_A	GTTATTTTTTTCCAAGTACTACACGTCTTTATTTTTAATACATTTATCATAAACAAAACTTATATCAATAactggatggcggcgttagtatc	TCTGTGGATGATTATGATTTGATTGGGACATAATCGATGACGATATCGAAGGTTGTCTTGAATGTGGCATcgactatttatatttgtatg	CTTTGGCTTCTTTGAATTTTGCA	TGGAAACTACTTTAACGGCAGC
GELC0320	C2_07330W_A	TATCACCGCTAGTAGATAATATTTCTAACTTTGATAGTAACATTAACGAAGAAAAACAAATCATTAATCAactggatggcggcgttagtatc	TGAAAATCTCTGTTAGAGCAACACCATCAACCACTTGTAGTTGTGCTGATGTAGATGCTGATGCTGACATcgactatttatatttgtatg	CTATGATGAATATGGGCCAAGC	GCATTTAAGGCAGCTATACCACC
GELC0321	C2_07530C_A	TAAAAACAACGAAATATCCAGATTATTTCAAATCATCTTTTTCTTTTTAGATTGTTTCTCCCACCTAACAactggatggcggcgttagtatc	TGTTTAATTTGCTAAGAAGTACTTGCGTATTATCAATTAGAATAATTTGTAATATCCCAATCACGTCCATcgactatttatatttgtatg	TAGCGAATGTAAATGGGCAATG	TGATGCCATTTCTTGACTTGTCA
GELC0322	C7_00740W_A	TTTATTTATTTAATTGATAACCACATTTACATCTTTATATCAGTTTTTCCCCCCCATCCTATACATTAATactggatggcggcgttagtatc	GTTCAAATATCGATCCGTGAAAGACAGTACTTTCAGGTTCAGGTGTTGATTTATTGGGAGTATTCGACATcgactatttatatttgtatg	ACACAAGAAGAAAGCAACAAAGA	TGTTCTTCAATAGTTGCCGATGG
GELC0323	CR_00260W_A	TAAAACAAAGAGCTAAACGCACTGACTAAAACGAATAAACTAATCTTGGACATTCCATTTATAATCAATTactggatggcggcgttagtatc	GAATTGATGGTAGATTTGGTGGATACACCTTTTTATTATGGTATTGTGAATCTGGGTCTTGATTGTTCATcgactatttatatttgtatg	GAGAGAGAGAGAGACCCCTTAA	TTGAGTGATTCTGGTGGTGGTT
GELC0324	C4_06260W_A	CATTTTGTTTTAGAAATATTCTTCTCTATAAGGATACAAACTTTTAGAGATTTGAAAGACTATACGACCAactggatggcggcgttagtatc	CTAGGGCAACTATTGATTGGAGATAAAGTAAAAGTGTTAATAATATCGAGTGGTGATTACGTTGATGCATcgactatttatatttgtatg	CAGCTGATTGGAATTGGTGAC	CAACACTCACAAGCCAAATCGT
GELC0325	C6_00160W_A	AAAAGAGTATATAAGCACCAAAAAAATTCCTTTTTTACAAGATCACACCATACTTTTTATCACCCAAGTCactggatggcggcgttagtatc	AAGACCATGTGGTGTAGTTGGCGTTAGCAAAAGCAATAAAGGTGAACAAGTAGATAACGAATTTAAACATcgactatttatatttgtatg	TGCTTCATCATACACTACTGGT	TTTGCTGGCACCATTAGACTCT
GELC0326	CR_04440C_A	CTTTTTTTTTCTTCTTGTTGTTTACAATCTTGTATTAACTAAGAACTACAACAATCAATTACAGTCAAAAactggatggcggcgttagtatc	CTGATGAATCAGCAGACATAACAGCAGCAATTGAGGCGGTTAAAGCTAATAAAGTGGTGGAGAATTTCATcgactatttatatttgtatg	GCAATTGAGGAGAATATTTCAGC	ACCACTTGATGAGCCAGATTTG
GELC0327	CR_08510W_A	ATCCATGGTTTTCCAATATTTTGCATTCACTGTAGACTAGGTTTATAACACACCATCATAATCATTCGCTactggatggcggcgttagtatc	AAGCTAAGGCACTGGAGGAAAACAAACCCAAAACAGTGGTAGCAGCAACAGCGAGTGATGGAGATCTCATcgactatttatatttgtatg	GATAACCAAACGCCAATCAGAA	CAGGACAACAGGACAGACTACA
GELC0328	C1_05760C_A	TAATAGTTCAAAGTAAGTTTTCTTTCATTCGTTAACTATCCAATACCCAATCTTACTTTAGAAATTAAAAactggatggcggcgttagtatc	TTCCATTTTGAAATTCAGCTAAAGCAACGGAAGATAAAGCAGAACCAGCAATAATTTTTGAAAAGTGCATcgactatttatatttgtatg	TCTTGAATTCATTGTATCGTCTTGT	ACACTAGATGGGGAAAGACTGC
GELC0329	C1_05960W_A	ACAGAGCATTCTAATACAATCCCACTACTATTGCAACTACTACTACTACTACTACTAAATTATCATATCAactggatggcggcgttagtatc	TAGGTGATGCTGCTGGTAATGAATATACTAATGGTATAAGTAGAAATATAAATGTGAATAAAAATTGCATcgactatttatatttgtatg	GGTGGCAAAACATCAACTTACT	ACCATCAACTTGTCCATCAGCT
GELC0330	C1_13290W_A	TTGTTTGAGTTTACTTGTTTGAATTTCATTTATATTAAATATTTTATTTTACCTGTCTCCCCAGTTCAACactggatggcggcgttagtatc	TATGGGATAATTCGCGACAGTTTATAAATATTGTTAATGAAACAAACACAAATATGATTGACAATTGCATcgactatttatatttgtatg	ACAACCTACTACAACAAGTTTGA	TGGTGTTTCTTCCAATGGTTCA
GELC0331	C2_00660C_A	TTCATCTATGCCTTATTTCCTTCCTTTTTATTCATAAAACATTAGATTTTTAATCACACACACTATTACTactggatggcggcgttagtatc	AGTCAGTTGAAATTGGTGAATCACCTGCTAATGCAAGAGCAACAATTGAAATAATAGACAAGTATTTCATcgactatttatatttgtatg	AATCAATTGACATGCCAAGGAA	AACTGGCTTTTCGTGAACATGG
GELC0332	C2_00800C_A	GAAACCATTTTCTAGCTATAATTTCTATGTTTCTATCAATGGGGAAAGTCTAATTTATCATTATTACACAactggatggcggcgttagtatc	CAGTATTCAAACTTTGAACCGGTAATGTAAACCATATCAAGGTGGCTAGTAGGCTACTTGTAAAATGCATcgactatttatatttgtatg	CCCCAATTCAGAAATAGCCAAG	CCGGAGCCCTGTGGAAATTTAT
GELC0333	C2_00910W_A	GAGGACATATACCATAAGATAGAAATACAATCACTAAATCTAAGTGACGGCAGAGCAAAATATCATAAGAactggatggcggcgttagtatc	CTATTGAAACTGGTAATGTAACTGGTAACAAAATTGTAAACCATAAAACTATGGAAGTGGTGGAGAACATcgactatttatatttgtatg	TCTTGTGGAAATTTTAAAGCGT	TGTGGTATTTTCATTCCCAGGAGT
GELC0334	C2_03350W_A	AACTTATCAGGTATCCATTTCACGAACAGACTGTTACACTTCCATTCGCTTCTAAATTTAAATACTCAATactggatggcggcgttagtatc	TGACAACTTGCTGTGCCAGCACAGCAGTGCCCAATGCAAAGATAGCTGTGAAAACAGTTGAGAACTTCATcgactatttatatttgtatg	TACCCACCACAGTTCAATAATGA	TGTTTGTCCATCCAGCAATTGA
GELC0335	C2_03440W_A	CTTTTTTTCACCAGTAAAACTTTGTCCCACCAACATTTCATTCGTTTATTTAAACTTACTACTACCAGTCactggatggcggcgttagtatc	CGGCAGCGGGGACAGCGTCTGCCGCTAAACATGATGTGAGAACAAAACTCAATAAAATGATACCTCTCATcgactatttatatttgtatg	ATTTGTTGGTCGAGAAATCGC	GGCAGTTGTCGCAGTAGTTTTA
GELC0336	C2_08430C_A	CTATAACTCGAAAAAATAGTTCCGTTTTTGCAAACCACAAACATTTGATACCAAACCATGTACAGTAGCTactggatggcggcgttagtatc	AACATAGTACAAATAACGTAAACCATATAACAAGTTTTGGAGTCATTGAATAAATTAGAAGTATTTTCATcgactatttatatttgtatg	ATACGATGCCTGTAAAACAACG	ATGTTTCCGATTCTTGGGTGGT
GELC0337	C2_08590W_A	ATTAATCTTTTGATCAATTAATTCACACTCGCTTTAATTAATTTATCAAATCCAAGAAATAATAATAATAactggatggcggcgttagtatc	CATCTTGAGCTAAAGTGGTGGTAGCAGCAAATAATGCACTTGCAGCAGCAAAAATAGTAGATACCTTCATcgactatttatatttgtatg	ACTTTGTTGCCGTTGGAATATC	ACCAGCACCATATAAATTACGAGC
GELC0338	C2_08980C_A	ATTCATTCTAAACTGTATTTGGCAATCACATTCATTCGCTTAGAAATCAATTCCCAATAAAAACAAAAGGactggatggcggcgttagtatc	TAATCAACGAAGAACCTGCTACGGACAACACGAAAACCCAAGAAACCTTATATTTGCACAACAATACCATcgactatttatatttgtatg	TTTAAATAGGGGCTGGGAGATG	TGAAGACGAAGATGAAGTACAAGGA
GELC0339	C2_09210W_A	AAAACTGACCCTGGTACAGCACGACTGTGGCAGTATCGTAATAAACAAAGGTAAACTGAAAATTAGAGCTactggatggcggcgttagtatc	GAAAAGTTATACGAACAACATTTTGTTTAGTGTGGATATTCCAGATCAACAACAATATGACTAAAATCATcgactatttatatttgtatg	AAATTGAGGCTTTGGTTTTGGT	TGCTTCGACGACATTGTAAACT
GELC0340	C3_01370C_A	CAAAAAAATGCTGAGACAAATCTCTTTCCAATTTATTTCAAACATCATTATTTATTAAAATATATTAATCactggatggcggcgttagtatc	GATCCAGTTTAACATTGGTGATTAAAAATGAAAAAATCAATAATATAAGCAAATTATTAGTACTCAACATcgactatttatatttgtatg	TAGCAAGCCAACAATTTACGAA	AGCGCACGTGAACATATTTCAG
GELC0341	C3_02300W_A	GATTTGGAAAAGTTGAAATACTATAATTCAAGACTATTTCACTAGAATACCCACACTTGCTGAGAAAATTactggatggcggcgttagtatc	CTGTATGGGCGTGAGTGGTTGGCACAAGCCTGATGATCCATAAAACAAGTAATAAATAACTGGCAAACATcgactatttatatttgtatg	GAGTTCCCATTTATATTCCGTGT	AGAAGTACCATCAACCGTAACGA
GELC0342	C3_03050C_A	TCAAGATTTGTTTTAATTTTAGGAATTGCTTCTACACTATCAACAATCAACAAACAAATTCACATTCGCTactggatggcggcgttagtatc	GCTTATGATAAACACCAGCAAGCGCAGTGGAAACAATACCAGCAAAGACAGCAATTGATTCCAATTTCATcgactatttatatttgtatg	ATACACTGAGGCAATTGTACGA	TTCGTGGGATGTAGTCAATGGA
GELC0343	C3_06190C_A	AGCATGTTTCCTGTAGGAAATTTCATTCATTGACTTGTATAAACATCATCAGCATCACCATTCACCGACAactggatggcggcgttagtatc	CTCCCGATATAGTTTTTGCCATTGCTATCGTGCAATAGAAAAAAAGATGTAATAGTATTACTGTCTTCATcgactatttatatttgtatg	GCATTCAAACGCATCTGTAAAC	AATTTGAAAACGCAGGGCATGA
GELC0344	C3_07160W_A	CCATCAAATAGTGGTGTTTTTTTTTTGTTTTTTTTTTGTGGGTTTCCTTTCTATCTGTTATTCAAAAATCactggatggcggcgttagtatc	CCACGGTATCTTTAATTTGTAATCCCAGAACAATTGGAATAGAAACAATTATTAATGTTGATACTTTCATcgactatttatatttgtatg	TTTTGTTCCATGCGCGTC	AGTACGGCCAACCCCAAATAAT
GELC0346	C4_01330W_A	TTTCATTCGTTATAACAATCATAAAGAAAGTGTTTCTATACTATACTAATTATTCCAAAAACATAACAATactggatggcggcgttagtatc	CATCAATTGCAATTGCTTTGATTTGAGTAAATAAAACTTGTAAAATGGTGATAATTGCAATTGATTTCATcgactatttatatttgtatg	AGTTTTCAAATTGTCAGCCACT	AGAACTTGCCATTGACATCTTGG
GELC0347	C4_01340W_A	TGATTTTTAGGGAGATTTTCTCTTCAATAAAACAAAATATACTTGAAAGTATTCTACACATTCATATATAactggatggcggcgttagtatc	CATTAGTAGATTCACTTAATAACAAAGTGGTCAACAATAAAAATGACAAACAATTTGTTGTAAATTTCATcgactatttatatttgtatg	TCTGTTCTAATCTGCTCTGTCA	GTGCGCCAGTAACAATTTGTAGT
GELC0348	C4_01360W_A	TTTCTTTCTTTCTTTCTTTCTTCTTTATTGTTAATTACATTCAATTCAATTCAATTTATCTTTTCAAAAAactggatggcggcgttagtatc	TGACTTGTTCTAAGTTGATGGCTAAAGTGGTAGTAGCAATTGAAACTAAAGTTAATAATTGGAATTTCATcgactatttatatttgtatg	TTCTTTCACAATAGGGCCATCT	TGGTCTTCTTGGCAATTTCAGC
GELC0349	C4_02390W_A	TCATTATTATCAACTAATCACAGTTAATTTAATAACAACAACAACTTTTACTATCGCTTAATACATTACAactggatggcggcgttagtatc	TGGAGTTGGAGTAAGCAGCCAAAGCGGAACCAGCAACAGCGGATAAGACGACAGCGGATGAGAATTGCATcgactatttatatttgtatg	GATCGACTCAACTCATTCATGC	GGTGACAACGGTGGTAGAAACA
GELC0350	C4_02440C_A	AATAATAATTGACAAGAGAAATATATATATATATATATTATAATACCAGGATAATAGAAGCATCATAATAactggatggcggcgttagtatc	ATCTAATAGTACTCATACTAGCTGATAAAGCAGTAGTTACTAAAACTGAAATTGGTAATATTGATCTCATcgactatttatatttgtatg	ACCAGCGTTTCAGATCAATTG	TAACGAGTTTCTGGTGCTTCAC
GELC0352	C4_03510C_A	TTTTTTCTGTTTTTTTATATACCAATACGACACAAGTCTCCGATAGTCATTCGCTTTTATACTTACAAGAactggatggcggcgttagtatc	ATGGGAAGGTAGCCTCAGCTGTCAAAATAAAGCAAGCGAGTGTGGCAAGTTGGGTAGTTGCAAATCTCATcgactatttatatttgtatg	AATCAGATCATGCCATACCACT	AGCAAGAAGTAACTACCACTGT
GELC0353	C4_04070C_A	CTTCATTCGCTTAACAGACATATAACAACTATAAACAAAACCAAAAAAACAATCTATAATTATCTACAATactggatggcggcgttagtatc	GAACATCTCTGATAGCAGCTAAAGCAGATGATGCCAAGGTTAATACAGTTGCAATTGTAAAGTACTTCATcgactatttatatttgtatg	TTTTCCTCCACCAATACTGAGT	CACCACCAGAAACAACCAACAG
GELC0354	C4_04470W_A	CTGAAAAATATTCATTAAACTTTCATTTGGTTTTCTTTGGTGATTATTTTTTTTAAACTTATAACTTTCTactggatggcggcgttagtatc	ACTTGATAGAACATTTCACAACTGAGGTTAAATATAGTAGGAATACAAAATTCATTATTACTAGGTCCATcgactatttatatttgtatg	AGCCACGACGAAGATAGATAAA	CCCACAAGTCATAAGAACCGGT
GELC0355	C4_04530C_A	TTTTTGTTTCATTCATAGATTTACTTATTTCCATTTAACATACCAAACTACAGGTTGAAGCCAAAAAAAAactggatggcggcgttagtatc	ATTCAAACTTGGCTAAAGTTAATGAAAAGAGTGTGGCAAATGTGGCCAATGATTTGATTAATGAATACATcgactatttatatttgtatg	TCGACGCCTCATTCATACTAAT	AGCAACAATGTAAATACCAGCGT
GELC0356	C4_06310C_A	GATTCATCCATATTCAATGAGTGAAAGCTAGAAAGATTCACTCTATACAACAAATTCAAATTACTTAACAactggatggcggcgttagtatc	TAGTAGTAGTAGTAGCAGCAGCAGCAACCGTAACCAGAATCAAGGTAAATAATACAATAGTAAACTTCATcgactatttatatttgtatg	ATTAGAAGATGGGAATGAGGGG	CTTTAGTAAAACAATCACAACTTCTC
GELC0357	C4_06550C_A	CCTGTTTTCCACAAAAAATTTTTCTAGATTAATTCTTTCCCATCATTACAAACCAATCATCATCCGCAATactggatggcggcgttagtatc	CAATTTCGATAGCAAAAATTAATTGAGTGAGTAAAGCGATTGAAATAAGGATATTCTGGAACAATTTCATcgactatttatatttgtatg	CCCATCAAACAATCTTCCAGAA	ACTGACTTGAAGTGCCAAAAGA
GELC0358	C4_06560W_A	ATCTATCCATATTCAATGAATCATAGTTATAAAGACTTTCTCTACAAAACAAAATTCAAATTACTCAACAactggatggcggcgttagtatc	CTTTGTTGTAGATTCTTTGAGCAGCTGTAACAATCAGAATTAAGGTAAATAATATAATAATGAACTTCATcgactatttatatttgtatg	GGTCAACTTCCTGGTACTAAATG	CCAATCCGAATCTTCAGTTGCC
GELC0359	C6_01680C_A	AAATACCTGAAGAATATTCTTTCGAGGACCAAACAGATTATTTAACTAACTACAAACAACACAGATTAGTactggatggcggcgttagtatc	CACCCCATTTCTCTTCCAAGTTTGTGGATATAACTAACGGAAGCAATGTCAAAAGTGCAAGTAGTTTCATcgactatttatatttgtatg	CGGGGAAGTCTTTGTTGTTTAT	TGCTTTAGGGTTGAATCCACGT
GELC0360	C6_03060W_A	GAATATCGCCTTTTGTAAAATCTATTTTTTGATACTCATCAACAATATTTTTAATTTTGCTTTAGTTAAAactggatggcggcgttagtatc	CTTGGAATAAATCATTGGCTTCAATTAATCTAGCTAATACCAAAAAAGCTAGAATTGAAATCGTTTTCATcgactatttatatttgtatg	TCAATCTTAATGACATGGGTGAC	TCCAATGACCAACCTAAAACTGA
GELC0363	C6_03860C_A	TGAACGTTTTGAAAAAGACCCACCACAGAGGTTTGATTTTTAATTAATTATTCAAACAAAAGAGGTAACGactggatggcggcgttagtatc	AACTTTGTTGGTCTTTTTTCACAGCAAAAGCAACTGGTAAAATCACAGCAAGTAGTAAACCAGATTTCATcgactatttatatttgtatg	TCCAGAAAATTTGATCTACCCA	GTTGATGAGGTTGGTGTTGACG
GELC0364	C6_04130C_A	ATTGGTTTTTAATAATTTTCACTTTTTTAACATAATTCTACATTAGCCATCTATCACCAAAACATTTCAAactggatggcggcgttagtatc	AAATGCCCGTAATAACCTTTGCCGTAGCAACTGATACACAGAGGCTTAGCAACAAAAATTGTAAAAGCATcgactatttatatttgtatg	ACAGAACAATTGACGCATGAAA	AGCATAAGTACGACCATCAGCA
GELC0365	C7_00190W_A	TAAGATCAACAATGGATCCCTTTTTTTTTGGTTTTTCTTTTCCCACCATTCGTGATAGCAACTCATAATCactggatggcggcgttagtatc	AAGCTATACCGGCTAAGGAAAGGACAAGGGCGTTAGTGGCCACGGAAAAAGGACTAATATGTAATGACATcgactatttatatttgtatg	CGATGCAGGTAAATTACGATGT	TGGTCTCCTGGGTAGTGGTATT
GELC0366	C7_00860W_A	TTCCATTTAGTTTCACTTCTAGTCTATCGTTACTACTACTACCATTATCACATATCACATATCCTTAACCactggatggcggcgttagtatc	GAGCAGCTAAAGTGGTTTGTAAAGTAGAAACAATTGCAATCAAAGTAGAAATCTTTAAAAATGAAGCCATcgactatttatatttgtatg	TAATTTCACTCCAGCCAACAAC	AGCAGAAATGGCAGTATCAGCA
GELC0367	C7_03110W_A	CCAATAAAACACGGTCAAGTTTTTGTTTTAATTCAATTAGAAAGCTATTCACAACCCTCAATTCTCCATAactggatggcggcgttagtatc	CTCTTTTGAATAGATTAATCAAACTTGCTGAAGATAAAGCAATAACTGCAAAATAAGCAAAAAATTTCATcgactatttatatttgtatg	GTATCAAAACCCAAGCACTGTT	CGAAAGCGCCATTACAACTGTT
GELC0368	CR_01430W_A	TTTTTTTGGTAACCATTCATCAATCATATAGAAAGAGTTGTCAACAATGATATATATGTAAGTTGTCCTTactggatggcggcgttagtatc	GCGATTCTGTGGCACTAGTTTGGTTGATACTAGGGGAAATTTCCAATTTATAATTTTTCGATGAGGACATcgactatttatatttgtatg	TTTTCGTATTGCTGTGGTGTAC	GATTAGGGTGTCTTCAGGGGTC
GELC0369	C3_05050W_A	TAATATTAATTATTCATAACCTATTTATTCATTGATTATACAACTAAAAATTAAAATACCGAATTACACCactggatggcggcgttagtatc	GAGGAGTTGTAGTTGTGGAAGTAGAAGTGGTTGTGTTTATTGGTGAAACAGGTGACATTGGTAAAGACATcgactatttatatttgtatg	TTTGAAATTACCTACCCACCCA	TCTCTAGTGAATGCTCGTTGACA
GELC0370	C5_00940C_A	GAATTCAGTAAACAAACATTCAATTAAGGCGAAGAAATATAGAAAGAGCCCCCCAAAAAATACTGAAACAactggatggcggcgttagtatc	GCTGGTCGTCTCTTAAATAAGTTGATTCATTGTATCTTTCCATAATTTCGGACTGTGGATCTTCGTTCATcgactatttatatttgtatg	GTTTGACGAGAAAGTAGTTGCA	TGCGCTGCTAGTAACTCATCTT
GELC0371	CR_04420C_A	TACTTATCCATATTAGATACCCGCACCCCCTTAATACATATTTTCTTTTAATATCAAATAGACTATCACAactggatggcggcgttagtatc	ATGCAGCATCTGAAGCAACTAAAGAAGACAATAAAAGGGATAATGATACAGTTGTGAAAGCGAATCTCATcgactatttatatttgtatg	TCCATCATCATCAACAACAACA	ACCATGGCAAACTAGTAGCATA
GELC0372	CR_08190W_A	ATTTTGGCGGCCCATAAGAAAAAAAAGTAACAACCACTAACTATGCTGTCAACACGATTGTAATCTTGCCactggatggcggcgttagtatc	ACCCTATCCAAGCCCATGGTAAAAATATAGAAATAAGCATAGGGAGTATTAATGATTTTGAGTAGACCATcgactatttatatttgtatg	TATGGGCCATGGTTTGTATCTT	TGTACATTCACCGAGCTGTTTG
GELC0373	CR_09690C_A	AAAAAACAAAACAAAACAAAACAAAACAAAACACACAAACTAACTAACTAACTAACTAACTCCACAAATCactggatggcggcgttagtatc	GGGACCAAGCTATTATTGGATTAGTATAAATTGATAGAAACAATACCACTATGATATTTAATAATTCCATcgactatttatatttgtatg	GTGGGACCAAAAGAAAAGAAAA	TGAAAGACCAATTTTAATCGAACGA
GELC0374	C1_13450W_A	TTCCAGGTTGTTGAAACTAATCGGGCATCATTCTTCTATTATCAACTACAATTTCAAGGGTAATAACAACactggatggcggcgttagtatc	CAACTTCTAATGCAGCACTGAGGTTGAGAGTAAGCAAAATTGTGAATATAAAGTTTGATACCACTTTCATcgactatttatatttgtatg	TCCAAGTAATCACACGCCTATT	AGAGCTAAGACAGGACCATTGT
GELC0375	C2_08990C_A	TTCAATCCAAAGACACACCATATAATAGTGACATACAAACAGAGAAAAATCGTTCATATATATTCTGAACactggatggcggcgttagtatc	ATTTGATCCAAGATGAACTAACAATGGACAATAAAAATATCCAGTAATGAATTGCAGTATTGAGCAACATcgactatttatatttgtatg	GCAAGAAAACAAAAGCAGAACC	TTCAACAGTACATGGCGAGACA
GELC0376	C3_06320W_A	ACTTTTCAACTTTGAAAATAAGAATTTTTCATCAATCTAACAATCTACAATTTTCAACAGTCTAATACCTactggatggcggcgttagtatc	CACCAGTAACTTCTTTGGATATGACCGTTGTAAACAGGGCCAACAAATATAAAAGATATAGTTTCTTCATcgactatttatatttgtatg	TTCCTCAACCAACTACATTCGA	AATTGCACTGAGGTTTCGTACG
GELC0377	C5_00730W_A	AGTGTAGAATTATAGCTAAAACTTTCAAAATTTTTCATTAATATCATACCCGAATAAAAGCAAAACCACAactggatggcggcgttagtatc	TGATAACAACAGCTAAAGTGGAACTGATTATTAACCACAAGGTTAAAGCAATTCTTTTGAACAAATGCATcgactatttatatttgtatg	CAAACATAAACCTTGTACGCCT	AAGAGTGGAGATGTCAGGGAGA
GELC0378	C6_00070C_A	TTTTCTGGAGATCTCTTTTGTTTCTTTTGAAGCAAACTTTCAATCATTCGTTACAAACTATAGTTCAATCactggatggcggcgttagtatc	TGTCAATTTCATTTGCATTGGTCAATGCAGCAACTGTTAGTAACACCGAACTGACAGCTGTTACTTTCATcgactatttatatttgtatg	TCAAGAGCACTGACAGATTAGG	CAGTGGATGGTTGGTCAGATGA
GELC0379	C6_03710W_A	TGCAAAGGGACGTGCTTTTCATTCTTTTCATTTTTGATGTTTAAAAACCCTTAATCACCAAGAATTTCGAactggatggcggcgttagtatc	AAACACCGGTAATCGTTTTTGCAGTCGAAACTGTCAAATATAGCAATAACAATAGGAATTGTGGTAGCATcgactatttatatttgtatg	GCATCATCCATCGCATAGAATT	CACCATCAGCAGTCAAATCAACA
GELC0380	C7_00090C_A	CTTATAGAGCCCTGGTCCCCAGAATTTGAAAATGTAGTTGGTTGTGAAACACTCAGGGATATACTCAACAactggatggcggcgttagtatc	CTTCTGTAATAGATGATTCTGCACTCACAAAGGATGCTAAAACGATTGAAATAACAATGGATGGAAGCATcgactatttatatttgtatg	TGTCCAATCAATGTCATAGGTG	CACAAACACCCAGTATCCCAGT
GELC0381	CR_00610W_A	ATTCAATTTGTTATCCTTTCTGGTTTTTTGACAGTTCCGTTTTCTTTCACGTCAACTTCAAACAACAATTactggatggcggcgttagtatc	TAATGTCAATGGCAAAAACAATGTTTGTTAACAAAGCAACTGTGATTATAAATTTTTGAAGGAATTTCATcgactatttatatttgtatg	CAGTGATTTGAATTGAACCGGA	AAGATGTGAGGTCAGCGAGATG
GELC0382	CR_01290C_A	ATTTGATCGACTTAGGTTTTCGTAAAATTTTTTATTATTATTATCAAACTAGAGATATACTGATATTAAAactggatggcggcgttagtatc	TTTTTTGTATTAACTCCTTGTTCTTCTCCTTCTCTCTGGAATCTACCAGAGTGGGATTCTTTTCCGACATcgactatttatatttgtatg	CTATTTAGTCGTGCACAATGGG	AGTAGCAGAAACACTAGGGAAC
GELC0383	C1_06100C_A	TTTCAAATATTGTATTCCCTATACTTTTATTGTTCAATTGGAGAAATATACTTAATATAATTCTTAAAATactggatggcggcgttagtatc	TTCCTCTGTTTTTAGCACAAGCAATAACAGTATTATTGTTACCTAAATCAACACCAAATGGAATAGACATcgactatttatatttgtatg	TTTGATTTGAGGGACACTACCA	ATCTGGATGATCATGAGGTAATC
GELC0387	C6_01970C_A	AGAAAAAGTAAAAATCAATAGTGAAATTTTTTATACTCTTCATAAGGTTGTACATCATAGAATAACAACAactggatggcggcgttagtatc	CTTAAACATGTATTCGCTCTCCCTATGAATCTCTTCTCCAAACATGGTGTTATCTAAACATACGAGCCATcgactatttatatttgtatg	ACTTGGTGTGAGATTATTTAGCA	GTTCACTTGATGTACGCTACGC
GELC0389	CR_02680W_A	ATTATTTTTCACTCAATATCACTATTCACAAGAACTACGGCCACGACAAAAACCACCCTACAGTATATCAactggatggcggcgttagtatc	AGGGGTTTGAACCCCCAGCAAATCCATTATTTCTTCTTAATCCATATATTGGATTTGATGTTTGACTCATcgactatttatatttgtatg	CCACGTCAAGGGTAACTACTAA	AGTTGTAGTTGCTGGGGTTGAT
GELC0390	CR_07510W_A	ATTACTGAAACAATAACACAGTTTTGTCATTATCCACAGAACGGTATATCAATATTTACAACTAGCCACCactggatggcggcgttagtatc	GAATTTGTGGCAATGCCATGTTAGTAAATTATTTAATACGAGCAGTCTTAACAAGTTGAATACATACCATcgactatttatatttgtatg	GTTTCAACTTAGGGTCATTAAACT	CAACGTTCGGTGTGTGTTTCTT
GELC0391	CR_08950W_A	GGGTTGGACACTAGTATCTTTTTTTGCTGTGTTGACACATTCATAGTAAAGCAATTAATATATCTATATCactggatggcggcgttagtatc	GCTGTTAGTAACCATGCCATCAAAGATGAGGATGCATTGCTAATTTATACATACCAATTGGAGTAGACATcgactatttatatttgtatg	TGACGTTTGCTTGTAAGATTCC	TTGACTAGCTTCAGACCCACAC
GELC0393	C1_05660C_A	ATAAAGCCATTACGAGTCTACAACTTTTTCAACACAAGACATTGACCAATCAATCAATCTATTTTTTTAAactggatggcggcgttagtatc	AAATGTACTTTGAACTAGACGAACTTGCAGAAGTGCCTGAGGATAAAGCCTGTGGAACTTGTACGACCATcgactatttatatttgtatg	TCACTTTCTCATCCATTCTTGC	GATTTGCAAAGTCGGGAACATT
GELC0394	C5_02230W_A	ATTGCATTTAAGTTTTTATATTTTGTATAACTTTTTTTTTTGAAAAACAAGAAGAAAACAATCACGAAAAactggatggcggcgttagtatc	CAATTTTGTAATTGTATGGACCATAGGTGTCATTGGATGGTCTACCCCAACTGTATGGATCGTGATTCATcgactatttatatttgtatg	GGTGTAAGCTTTACAGTGGTTT	ACCAACAACAGTCTCCTTACCT
GELC0395	C3_00290W_A	TCTTATTTCTTGGTGGCGAGTTTTCCAAATCAAACATTATTTGTATATCCCATACTCCAAGCAAGCAATCactggatggcggcgttagtatc	CCTTTTTCTTATCATCTTTCTTTTTGTTGAGATTATCGCCACCTGGTATTCCTGAAGGACCTTGACCCATcgactatttatatttgtatg	ATGCTTGTCAAGAAACACATCC	TGCTTCTGTAGGTTGGAATGCT
GELC0396	CR_01610C_A	ATTAATTTGTTGTTCAACCCCGAAGTTAACACGTTTTTTTACAATTATTTCACAACTATTTAAAAGAAATactggatggcggcgttagtatc	GGTATGTAGAAGAATTTGTTATAGATACAAATTCAGCAATCAATTGGGAATCTGGAGTATTTTCAGACATcgactatttatatttgtatg	TATTTGGGATTTCAACATCGGT	GCAATCCTGATTTCTCTCCTCCA
GELC0397	C2_02240C_A	ATTATTAAGAAAACAATTTTTTTTTAAAAAAATATAAAACATTTAATACAGACCCTATTTATTATTGATAactggatggcggcgttagtatc	TCCTAATTTCCGGTTCAATCTTCCTTCTTTTGAACCCAGGTTCCCGTGTAGGGTTATTGTCACTATTCATcgactatttatatttgtatg	GTATATACCTAGCATGCCGTGT	TGTTTACACTTACGATTTGCACG
GELC0398	C1_02810W_A	CTACTTATTCTTCACATCAAATACACATTTAAATAATACCCAGAATTTAGAGCATCCTTGAACCTTACAGactggatggcggcgttagtatc	CACCAATATTACTCGTGTCTGAATCTGAGGAAGACTCGTTATCTGCTACGTCGTTTCTTGAAGGTGCCATcgactatttatatttgtatg	GAAGGGGACGGAAAGTTATGTA	TTGCTTTGAACACGCGTAGAAG
GELC0399	C1_06650W_A	CAATAGAAAGTGAAGAAGAAGTAGAAACCACCAGTCTCCAACTCTATTATTAATATTATCTCTATTCACAactggatggcggcgttagtatc	TTAATGGATCTAAATTGACGGGGTTCAATTCGAATAGATCTTCCATTTGAAATGGTTTTATTGATGTCATcgactatttatatttgtatg	TTTGTTCTTCAGTTGGTTGTGG	ACGGTATTGGTCCAGAACTGTT
GELC0400	C1_03730C_A	TTCTTACTATTTGCATATAAATTACACCAAATAATTAATACTTTTCAATCCTGGGTTTTTTTCATTCCGTactggatggcggcgttagtatc	CTCCTGCTGGTTTGTCTTTATATGTATTATTGCCTTTCGATATATTATTTATACCAAATGAAAAAGACATcgactatttatatttgtatg	ATTCCAAGAAAGAAAGCAAGCA	CTTCCAGTTGAGCTCTTTCCCA
GELC0401	C5_04600C_A	ACAACAACAACAACTCCCCCATCAAACTCAAGATTATTCATAACTCTTTTTTCTTTGATTTATATCATCAactggatggcggcgttagtatc	GTAGTGTCTTAATTGTGTTTCCTGTCTCAGGCATGTTAGACAAGTCGTCTAGACTGGTAGGTGAACTCATcgactatttatatttgtatg	AACACAACACAACACATTCTCA	GTGAGGGCGTTTAATGCTTGAT
GELC0402	C7_03870W_A	ATACACCATCAAAAGATTCTATTAATCAGGATATTCACCCAAATTCCCTCCCCCCTTCATACTATAAACCactggatggcggcgttagtatc	AAAAAAAAAAAAGGGGGGAGTAACATACTTTAAAATCACGCATAAGTCTTCTTCTAGCAGGTGTTGACATcgactatttatatttgtatg	GTGGCGATTTTCTATTACGGTC	TCAAAAGAAAGTTAGGATTGAGGGG
GELC0403	C2_00970C_A	CTCTTAGACTCATTAATTTGTGCCATTATTTTTTCATTTGGTTTATTTTTGATACTACAAACAGCCAACCactggatggcggcgttagtatc	AATTCTCCATCCCAAATATTTTATCTGATCCATCACCGAATAATAGATTGTCGGTTTCACTGTTCCCCATcgactatttatatttgtatg	CGGAATAGGTTAAGGTTGCAAG	GCTTCCCTCCTTGTTCTCGTAG
GELC0404	C5_00560W_A	ATTGTTTATATCACAAAAAATCTACTTAAATCCTACATACTTCAACCATCATAGTTGTTTCAAAAAAAAAactggatggcggcgttagtatc	TTATTCCAGGGACTGGATCACTGACTAAACGTTCAGTTTCTTTAATGATTCTCTTAGGTAATGCTGCCATcgactatttatatttgtatg	AATCACACGACCATGACTTTTG	TCAACACATCCAAACAAATTCTTCCT
GELC0405	C4_01470W_A	TACAATTATCATTCTATTATTCAACAATATTTAAGAACCCCAATTGTGATTGGAAATTAGTTACGATAATactggatggcggcgttagtatc	ATGAGGAAAGACTGTCTGATGTTGTCGGATTCAGCATGATGGATATATCTGCGTTATTTACAGAACTCATcgactatttatatttgtatg	AGAGAAGATGTAAAGAAGAAGCA	TCGGTAAATGAATTGATCGATAAAGT
GELC0406	C4_00460C_A	TCTTTTAAAGCTGTATCACAAACCATTTAATCAACACCGAAATTAAATAACAGAAAGGCATACTAGCGGGactggatggcggcgttagtatc	GATCTTGTTTTGGGGTATTTCTAATATCACTGTGTTGAGGATTTGTAAAGCTTTCTAATTTCTTAAACATcgactatttatatttgtatg	AGCTTAAGTCTTACAATGGCCT	ATGTAAAGACTCTAACCGCGGT
GELC0407	C7_02860C_A	GCCATTCAACAACTTCAATTTGACTAACTTGTTCCTTTTTTTTTGATTTTTTTTTTGGTTAGGTTTCTTCactggatggcggcgttagtatc	GATGATATAGAGGTTGTGATGAAGTAGCCTCACCACGACAAATACGACATGTGTGATCTGTTGATGACATcgactatttatatttgtatg	AAACCATACTTGAAACCCAGGA	AAGTGGAATATACTGTGGCATTGC
GELC0408	C7_04050W_A	TTTGTTTGGTTTTTCTCTAGATTCTTCCACTTGACATAACAAGTGTTCAATATATTTCAAACATTCCGTCactggatggcggcgttagtatc	ACTGATGGGGCTTGTACGATAAGACTTTTAAAACTATTGATTCTTGCTCTTTTGTATAGGATGAGGACATcgactatttatatttgtatg	TAATTGGTACTTGGGTGTTGTG	TGATTCTTGAAGTAGGGTCCGA
GELC0409	C1_05330C_A	TTACTAATTTTTTTTTTTTCTTTATCACGATTCTTCTATTTCTTATTTTAATACTTAGCACTATTTCTTCactggatggcggcgttagtatc	AATTGTTTGATTTGTAAACATATCTTCTGTAAGGTGCACGGGTTTTCTTTGGACGTCGTTTATTAGCCATcgactatttatatttgtatg	TTGATCCTTTTCCTTCCACTTT	TCAAATTTACTCCATGGCCACA
GELC0410	C1_04960C_A	CCAATGGCAATTTTATTATCAAACAGTTTTTTTTTTTAGGTCTCAACAAACCATAATCAAAAGCTAATCAactggatggcggcgttagtatc	GAGATGGGTTGATTATTGTATTACCAAGTGAATCTTGGGTATGATCTTCTTCCTCTTCTATACTTGTCATcgactatttatatttgtatg	AGCTTAACTATTTCAAAACGTGGT	GGGAAACTAGATGATGTAATGGGGA
GELC0412	C1_03810C_A	CTAAAGAGTTTACAACTTCAACAAAAACAATCAAATTATATCTATCAAACGTATATATTTACTATTAAATactggatggcggcgttagtatc	ATATATCAACTAATGACGGTAGCTTTTTGTTCAGTTTTTTAATTTGTGTCAATGGTCGTAGTGATTCCATcgactatttatatttgtatg	CCACCATGATTGTTAAGGTTGT	TGGTGGTCGATCAGGAAAATCT
GELC0413	C4_05250W_A	AATGGAAAATTCTTACTTTACTTTTTTATGGAATAACACCTTCTAATCTATCATTATTCATAGTCCTCATactggatggcggcgttagtatc	GAGCTAGTTTTGGTTCTGTGGAGGAAGACGAGGAGGAAGAAGTGAAAACAGTTTTGAAATGAGACAACATcgactatttatatttgtatg	ATTCATTCTTGCATTACCACGG	CCATTGGTTGTAAGACTTTGGTGA
GELC0414	C6_03050C_A	TGATACTGAAAACCCCCATCTATCCAATCTTTCCTCGAGGACTAATGAATATTTAACTTGATCCAAAAAAactggatggcggcgttagtatc	ACTTTAGATTTGAGTTGGGTACCATTAATAATAGTTTGATTTGTATTTCCAACGGCAACTTGACTAACATcgactatttatatttgtatg	CCTCCACATTTATCTTTCCAGC	GGTGGTGAAATCAGGGTTGTGA
GELC0415	C3_00310C_A	TTCTTACACACTAAAAAAAAAAGTTATTTAAATTTATACGTGGTACTCAATTACTCCATTTTACAGAACAactggatggcggcgttagtatc	TAAATTCCAAAACTTCTATTTCATCATCTTCGTCGTCTGAAGAGATGTTGGTTACATTGGGAGTTGACATcgactatttatatttgtatg	CCAAACACGTCAACCCATTATT	CGGACACAAACCTCTTCCTCTT
GELC0416	C3_07610W_A	TAAGTTGATCATTTTCTATACACTTTTTTTTCTTTCTACTTCTAACTCCCCCAGACATAAACAATTGACCactggatggcggcgttagtatc	CCATAAACCTAATATCCGGGTCAACGTCCATTGCCCTATCTTTCAATATGTTGAAATTAATATCATGCATcgactatttatatttgtatg	CCAAAACAAGTAACGATGCTGA	TGGTTCAAATGATTTTATTGCTTGGG
GELC0417	C5_03570W_A	CATAGGATATCATGGACTCATCGACTGTATTATTTATTGGAGCAGTTGCAGTTGCATTTATTTTTTTGAAactggatggcggcgttagtatc	CTGTGGATTGGTCTTGTGACAAATGATCTATGTTAAACTCATTTGGTGTGGTATTGGGGACACCATCCATcgactatttatatttgtatg	ATAGCTGGATGACGTTGTTGTA	AGCTTCCACATTTCCGGTAGTT
GELC0418	C3_05110W_A	GTAGAACAAAACGAATCTAAGCACCGTATTTGCCATTCTCCAAACAACAACATCCTCACGATAAAGATCAactggatggcggcgttagtatc	TCGATATCATACATATCGATCGTGTTACAGGAGTGTTGGTAAACCCTCGTATAGGAGTTAGTTGAGCCATcgactatttatatttgtatg	ATGCGTGTAGTATGAACAGTGA	ACTTAAATACTTCCGTGATCCG
GELC0419	C3_00940W_A	TAATCTACTGAAATCACAACTAAATCCCCTTCTCTCCTTCTCTCCTTCACATCACATATATTATTTTAAGactggatggcggcgttagtatc	CTTCTTCAGAACCACCCAGCAAATCATTACTGTTGTTTCTGCCATTCGATGACCCAGAGTCGTCAGGCATcgactatttatatttgtatg	TAGCTTTTAAGAGATTGTGGCG	AATGGTTTCTTTGTCTGCTGCC
GELC0420	C1_01560W_A	TTCAAACTTAGCCCCCAAAAAGTAGCAACATCTATTGAATCCTCCAATAATTAACGATTATGTTAAAACTactggatggcggcgttagtatc	CTTTAAAAGATCTCCACACTTTAAGTGTTTCCGTATAATCATCCTGTGTAACTTGCGGTACTGTACTCATcgactatttatatttgtatg	GGCTTAATTGAAAAGTATAGGGCA	GCAGTCAACTTAAATCGCCCTG
GELC0423	C2_10050W_A	AGTGAACGGCAAACACGATAATCAGAACTCGAACTCAATTGATTCTGGGTCTAAAAGAAGTTTCAACAATactggatggcggcgttagtatc	CCTCAACATTTATTGATGGATCCACCGAACTAGTATTATTATCACTATTGTTATTATTATTTGTTATCATcgactatttatatttgtatg	TTAACACAACACCACTACAAGC	ATCAATCACTTCAGGACTGGCT
GELC0424	C3_04970C_A	CTACCCTATCCGTTTGAATCCGTATTATCCCATTCTGTCAGGAAAGAAATAGAGTTTAAAAAAGGAAACCactggatggcggcgttagtatc	TTGGTGTGGTGTTTGCAGAGCTTGCTAACTTGGCCAATCTTTTGGCTCTCACATCATCAGCACTCGACATcgactatttatatttgtatg	GTGCTGTATATAACGCCAACTG	TGATCTACAGGAGTATGACCAGA
GELC0425	C4_02960W_A	AGATACCAAGAATACTAGAAATAAATAGGTAAAGAATCAACATTCTCAAAGTGCTCGAATATTTGAAATTactggatggcggcgttagtatc	CGAAATCTGCCTTGATAGGAAGTTGTAAAAGAAACTTTTTTAACAACTTATTCTCTTCATCGGTTTCCATcgactatttatatttgtatg	TCACCAATTGTAGGAGTGTTTC	CATGTTTTGGGTCTCGTTTCGA
GELC0428	C1_03610C_A	GAACTCTCTATTTTTTTTCTTTCCTATTTTCTATGGTGATACTTTCTACAAGTCTACTTTTCTCTGATCAactggatggcggcgttagtatc	CTATGCAGCCTGCTCTCAAAGTCCAGGATAACGTCGATCCGACAAACTTAAGTGATTCAAAGAATGTCATcgactatttatatttgtatg	TGGGTTTCGTTTATTAGATGATCG	AAATCATATCCCCTGGCATCCC
GELC0430	C1_05300C_A	TTAAGGTTTTTAACAACACTACAAAAATCAACAATAAGACCATATATAAGGTTGTCTAATTGCGCTATACactggatggcggcgttagtatc	ACATGTTTGAGTGATAAAATCGGTAGGTTACGTATGATAATAAAATAACAATGAAATATGAAAAATTCATcgactatttatatttgtatg	AACTCCTCACGAATTTTCTTGG	CAACACATTGTCAATTGATGGG
GELC0431	C2_00700W_A	CAGTGATTAAACTTTCTTCAAGTCCATCCAAATAGCATACCTTGAACGTGAAGCTGTTGTCTACAAATTTactggatggcggcgttagtatc	CAGGATAAAGGGTGTTGACTCCTTTAATTTCTTCGAACTCCTTACATTTTTCGTCAAATTCTTTCAACATcgactatttatatttgtatg	GGCTCTACTCAGACGGAATTTA	TGTAATCTGGTTCTTCTGTGTT
GELC0432	C3_06230W_A	TCTTTGTTGAAAACTTTGCAACCTAAAAAAATAAGAATCACTCCAACAAGTTTAAACTACATTATCAATTactggatggcggcgttagtatc	GGTGTGAGCATGCATATCTTCTTACAACCCGACTTATGGCCCTGCTTTGTTTTAATCTAGTTTTCAACATcgactatttatatttgtatg	AAAACTTCCTTTTCCTGGTGAT	TGGAGGATTTGTTTTGAAGGCA
GELC0433	C4_03230C_A	AGAGAACATATTTCTGGAGAAATCACTGAAAAATCCAATGATTGATCAAGGAAAATTAGATCCGTTGAAAactggatggcggcgttagtatc	ATTTGTCTGCCACTTCTTGTTTGATGTTGTGTATGCTGACATAGTTAACTCTTTCTACTTTATTGTTCATcgactatttatatttgtatg	TGGTGTTCTATACTTGCCATCT	CTCCAATTCCCGTTGTTGAGTG
GELC0434	C4_04550C_A	TTAGAGAAATAACAAGAGTAATAACCCAAATCATTCTCAACATCAATATCAACCACTTGAAATAGTGACAactggatggcggcgttagtatc	TATCAAACCGTTTATAGGTGGCATATGTTCGTTTGAAAAATAAACGCAGAAATATCTTGGAGCCAAACATcgactatttatatttgtatg	TGTTCTCTGGGTTTCTATCACA	TGCAGTTGGAATTGTTGGTAGA
GELC0435	C5_00860W_A	CCAATTGAAATACACCCCCATAGCAACACTAGTTGTCTTCCTTCCCTTCCAATATATATAAACACAAATAactggatggcggcgttagtatc	TGAATGAATATAGTACTGGAAACCATGTCAATGTTAACAATGTGGTTTTCACTCCTCTAGATATTCCCATcgactatttatatttgtatg	TTCATTGTGATTGGCAGCAAA	GGTTTTCTGGCGATCGAAACAT
GELC0436	CR_09470W_A	TATATATATATATAGACATGTTAAAGACTATGTTTTGTTAGAGGTTTGTACTACACCACTACAACCAACCactggatggcggcgttagtatc	TATTGTGTTGTTCAATTAATGGTTTCTTGAAATTAGTTTGTAAAGTTGTTGCAGAAAAGAAACAATTCATcgactatttatatttgtatg	CCGAAAACCAGCTTACATTACA	TCCATTTATATCACCACCCATTT
GELC0437	C6_02860W_A	CTTCTTCTTCCCAATAAAGATAAACTTTAAAGATCATAGGTTTTATATATGCATTTGTATATATATTCTTactggatggcggcgttagtatc	TTGAATAATATTTGCTCACTGAAACAAAGGAACTTCTAGTGGTTGTCAATTTCAAGGAGGGAATTATCATcgactatttatatttgtatg	TGTTTTATTTGTAGCTATAGTCGGA	AATGTTCACAGAAATGGGCGAG
GELC0438	CR_04340W_A	AAAAAAAAATTTGGCGACAGTTCAATTTCTATCTCTTTTGCCACATTAAAGGTGTTAATATATTTCATAGactggatggcggcgttagtatc	ATGTTCTAGGTATAGAAACTCTAACCAAAAACAAGGCCCGAGGCTTGTTACATTTGGAAGCCTTAATCATcgactatttatatttgtatg	TAGTCAGCGTGTAAGAGGTATG	TCGGCTAGGTTTGTCTTTGTCA
GELC0439	C1_13780W_A	GAGACATTATAGAGTGAAGATTGTACATTAGAATACCCTCCCTTTCTTCCCCCCCCTTACTCAATAAATCactggatggcggcgttagtatc	TAGCACTGATCCAGCCTAGTTTTTCATCAGGATACCAACAACGGGTTCCCACATCGTATAATGATACCATcgactatttatatttgtatg	TGTTTTAAGAAGTTGATTGGGCA	GTCAAATCTTCTGCTGCTTCCA
GELC0440	C2_04230W_A	TAAAAAAAGAGAATATCGTCCCCCTTTTTTTTTCACTTAATTATTTTACGACTGATAACAAAATCTAACCactggatggcggcgttagtatc	TTGAAGTGTATCTTAACCATTGTCTTGGTTGTACGGCAGATCTAAGTAGTGAGCTAGTTTTCAATATCATcgactatttatatttgtatg	TCTGGTTCAAGATCCACTAAAGT	GGTGAAATTTTAGGGGTGTGCC
GELC0441	C2_04500W_A	ATTTTGGGTTTCCATTTTTTTTTACAGCCACAAACATCCAAACATCAATACTTAAAAATATTTCTGAAAAactggatggcggcgttagtatc	CTGCAGTGTTTCTAATGAATGGTGTTGATCCTGTCTCCAATAATACTACTAATCGATCTAATCTTGACATcgactatttatatttgtatg	AACGACAATTCATCAACACCAG	CTGGCTGCAGAAATTCTCGTTT
GELC0442	C2_08760C_A	TAGAAAGTAACAAGAGGTAACTTACCAAAACCAATTATAGTTATTATCAAGACACTTAATCATTTTTAGAactggatggcggcgttagtatc	ATGGGACAGCACCAGGTGTTGATTTGGAATCACCAGTCGAGGACTGGTTTGAAGTAGTATTATCAGACATcgactatttatatttgtatg	CACTCTTCTACACGTCCAGTAA	TGGGGTTGTTGTTGTTGTTGTT
GELC0443	C3_02960C_A	CTTTGCTTTTTCTGAAAAGAAACATTAACGTGTTCTACTAGTTTGTCACACTACGACACAAGTCCTTGAAactggatggcggcgttagtatc	CAGTAGCTTTGACAAAATTTAATAAAACAGCAACCGCAATGGTGTAGTAGATATACCTTGCAATTGACATcgactatttatatttgtatg	ACAGAAGACATAGAGCCAACAA	ACGATGGCCTCTATAAAGCTAGG
GELC0444	C3_04760C_A	TAATATCTTTTTTTTTTTAATCATACATATATAGGCGGCATCATTTCTTTTTCAGACTAGGCACTTGACGactggatggcggcgttagtatc	TTACTAGGTTGTCATACTCGGGTGGTTTTTGTGTTTCTACTCCCAGCTGTGGTGTTACTGGATGTGACATcgactatttatatttgtatg	ACAGAACAAACAGAAAGAGCTT	CACGTCAGCAAAGATTTCCCTA
GELC0446	C6_01610W_A	TTCTTTCTTTCTTTCTTCTTCTTTCTTTCTTTTTTCCTTTTCATTACAGTAATAATAAAAATAATCCAAGactggatggcggcgttagtatc	ATCACTAGAATGTATTACTAATTGAATTTAATAAAAAAAAAGGTAGTCAACATACATCTTCTTCAGCCATcgactatttatatttgtatg	TATAGAGAACGAACACCAACGA	TGCAAGTAAAGGGAATTGAAAGACA
GELC0447	CR_00640W_A	TGAATAAACACTCAAAAACTACTCACAACAACAACACTTATTTTCACTTGCTTTATTTCTTCGATTTTTTactggatggcggcgttagtatc	TTGTAATTAGGAAACGCGATCTATGTACAAGTGAGTTAGTATTCTTTATTAGAGATAATTTGCATCTCATcgactatttatatttgtatg	TTTGAAGAAGCTCGAGTGATTG	TGACCTTGATGAGCTCTGACAA
GELC0448	CR_03700C_A	ACGACTCCAGAATTTTGATTCTTTAAATTATTTAAACTGTTCAAATTTGATAAATGTATCATTATTTATAactggatggcggcgttagtatc	GTCCAAATACATCTCCAATAGCATTTTCTAAATCTATATCCTCTTTTGATGCTCTATTTCCTTCATTCATcgactatttatatttgtatg	TGATCATTTCACACGACACAAT	TGGGAGGGTTGTGGTAAATCTT
GELC0449	C2_02760W_A	ATCAACACCTAATCAAGATATTTTACATCACCAACCCAATTACTGTTCCTTCATTATTCACATATACAGAactggatggcggcgttagtatc	CATAATCAATTCCTAATATTGCACAAAAAACAATGGACAATATATAAAAAATAAATAGAGATCCCTTCATcgactatttatatttgtatg	ATAGAGTCGTTATTACTGGGGC	TGTGTGGGAATCTGGTTACTAAGG
GELC0451	C3_05680W_A	TTCTTTCCATACCCACATCTTATAGACATTAATATCACCATTTAGCATTTTCCTTCTTTTTTTTTGTATCactggatggcggcgttagtatc	ATGGCGGTGGATTGGCTTGTATTGATTTATATTCTTTATTTAAACGTTTAGTTGCTTGTCTTGATGCCATcgactatttatatttgtatg	TTTTGTAAGTATATTTCCCATCAGG	TGGGTTTAAATCGTCCACTAGG
GELC0453	C2_09930W_A	GATGTTGTAACTACTACTTATCTATTAATATACTAATAGAGCCGTTTCCATGCCTAACTTATGGTAGATTactggatggcggcgttagtatc	ATTTGAGTGAATTGAGATCTTGTCCAATCGACACGACCTGGAGAAGATGGCTGATAGTAGGACTACACATcgactatttatatttgtatg	TCTCCAGAATCAGTACGAAGAA	TGATGTTGATTTTGGTACTGTGA
GELC0455	C1_05750C_A	TATAAATATTCACATTATATACTTTAAAGCAAAGTATATATACATAATTTTTTGTCAAAACTCATGGATCactggatggcggcgttagtatc	TGGTTTCTGTTTGTTCATTGTTGACACTATGGCTATGATTGTGACTATGGTCATCAGAGTGATAAGACATcgactatttatatttgtatg	CCTTGCGTCATAAATGTAAAGC	GCAGGCAGTGTTAAAATCTTGC
GELC0456	C3_00670C_A	AGTAAGAAAATTTTTCTTTATCCTGTTTTTTTTTAGTCATTTTTTTGCTAGGATTTACGATTATTTACAAactggatggcggcgttagtatc	AAGGAAGTAATTCATTACTATCTAGTGGTGAGTGGGGACGCTTTTTCGGTGTGATAAATTGTGCTGACATcgactatttatatttgtatg	TCACCAATTCATTCAACACTAGC	TCCTATCGAAACTGCCAATGACT
GELC0459	C2_04220C_A	AATCAATTTACTTTGATCTATATATACATATTATTTTGCTGCACAAGTCATTTGAATTTTTATTGGCACAactggatggcggcgttagtatc	ACCTTCCAACATCTAATAAACAAAGTTTGCAGGAGGGTATTGCTATTGTTTATCCACATACTTCTGACATcgactatttatatttgtatg	AGTAGTAGAGATTTTCGTGCAGA	TCTTTACCTTGAGAGTCCAACA
GELC0460	C1_03740W_A	TATAGAATACCTCCAAACAAAGTTCTTTCAAAACAGAAACAAACACCTAAAGTAAAAAAGAAGTACGGAGactggatggcggcgttagtatc	TATTAGAACCATTACTGGCACTAGGCGATACACTATCAACCAGACCTTTTTCGGGTGTAGTATCCGACATcgactatttatatttgtatg	CTACAACCAATACCACCAAAGG	CACAGGGTGCACTTGGATTATT
GELC0461	C1_07020C_A	TATTTTCTATCAACCAACACCCACATAAATCATTCCTTCATTTACTTATATATAATCCGATTCTTGTACAactggatggcggcgttagtatc	GTGGAATGGTATCTGAATTAATTAATGCATTTGCAATTTTCTTTTCCTCCGAAGGCTCTTGTGAATCCATcgactatttatatttgtatg	AAAATAACTTCCGCACTTTGGA	AGGACACCGAATATGACGTGTT
GELC0462	C1_00670C_A	TTGTCTTTGCATTTTTCTTTTAGGCAATTTAGGCAAGTCTTAGATTAGCCGGCTATTATTGAATCAGGTAactggatggcggcgttagtatc	GTAATTCATGCGCTTGCAGGGTGTCTGTTGCTATAGTTTCATTTGATGTTAAATCGAATACGTAGAACATcgactatttatatttgtatg	CTTTACGGCGTTTAGTGTTCTT	ACAATTAACTTTGCGGCGTTTG
GELC0463	C3_05470W_A	TTATTCAATTTAACTGCTTAATTTATGCTCATTTAATATATATATTCTTTCTTTGTCATTCAAATTCTAAactggatggcggcgttagtatc	GTGGGGTTGTTGTAGATGGGTTTTTTCTTTTCCGTTTATTAGTAGTAGAAGTTGATGAATTGATTGACATcgactatttatatttgtatg	TAAACTATGTGTGTGTGTGTGG	AGCTTTAAGACGTTTTGATCTCA
GELC0464	CR_03240C_A	TTTTGACAGATCAACTTTGTTTTAGATCTTTCAAAAATTCAACTACAACTACAAAACATACCAAAAAGTCactggatggcggcgttagtatc	ATGCTTTTTTCAATTCGGTATCGGTTGCCGTTGATGATACTTCTAATAATTCATAGTAACATGTTTTCATcgactatttatatttgtatg	CTCTTGTTGGTAGATTTTGGCA	AATCGAAGGTAAATATGATTCTCCT
GELC0465	C1_09180W_A	GATTTACATTCCTGAATCCAGAAAGAGGCCCATACTATTATCATATCCCCATATCTTTATTAGTTTATCTactggatggcggcgttagtatc	AATATATCCTTTTTTGAGACACGAAAGCAACAGAAGGTGATGATCTATCTTGTGAAATATTTGACGCCATcgactatttatatttgtatg	CCTTCTCCTTTTCTCCATCCAT	TGCTCTCGTTGCTTCTTTCTCA
GELC0466	C6_02750C_A	ATCACATCTCAATCAACCAACTATCATCCCAACCACTACAACTATTCATAAACCAAGTACTGACTTCGTCactggatggcggcgttagtatc	GATCCAGTGGAGAATTAACACCCGAAGAAGACGCGGTAGCAGGTGATAAAGAAGATGGTGATTGTGACATcgactatttatatttgtatg	GCTTTGTTCTGCTTTGTTTTGT	TCGTCTTGATATTCGAAGTACTT
GELC0468	C4_02500C_A	AGAAAATAATCTCCCAAGAAACAAAAAGTAGAAAAAAAAAATTAAAAAAAAAAAAAATAAAACTAACTGAactggatggcggcgttagtatc	CGGACTCAGTCATTAAAACTGGGTTGACAAAATAATTAAGGTATTGACTCTGGTGAGTTGGTGAAATCATcgactatttatatttgtatg	TAAATAAGAATTCAGAGGGTAGGGT	ACATGTTTGCTGTCGTTGTTGT
GELC0470	C4_02530W_A	CCACTACTATATTCATATCATTATTTATAACTATTCATATAATTCTATAAATTAATTAAAACCAACATATactggatggcggcgttagtatc	AATCACATTTGACTTTTCTCGATCTACATGTCCAACATCCTTCAAATGTACGACCTTTTCTCCTTGCCATcgactatttatatttgtatg	AGTTTGGCTTGGGTTTTGATTT	TCACTAATTCAACATTTCGTCGT
GELC0471	C3_05920W_A	TGCCCTTCTTTTTTTTTCTTGACGGATAAATCAGTATCAGATATCGAATTATTAATCTAATTTATTAAAAactggatggcggcgttagtatc	TTTTCCGAACTTGGGGTTCTGTACTTTTAGGACTTTTAGGTGTTTCTATAGGGGTGGTGGCAATTGACATcgactatttatatttgtatg	TTAGCCGAAGTTTGGATTTTGT	TTCCGTGTGATGATCCATTGGT
GELC0473	C2_02530W_A	GTTGTTTTTCCTTCTTAAATTTTGTATTAGTCTTATAGCTTTTTTTTTTTTTGTCATTGTTGATCTAATCactggatggcggcgttagtatc	TTTCACTCAATTGTTGAAATGATGGTAATCTTGGCAAAGTGTTAGGGATATTCTGATTTGCTCCATTCATcgactatttatatttgtatg	TGCCCGATTTTAAAGTTGATCC	ACAATACCATTGACAGGAGCAGT
GELC0475	C4_02220C_A	AAAGTCTGGTAAGTATACTAATTAAATCTTTATTATTCTACACAATTTTCCCTTTATATGGTTTTGAATTactggatggcggcgttagtatc	TTCGCTTCTTACAGTAATCACAAGCTCTGGATACTTTTCTTCTTCTTTCTTTAGTGGTTTCTATATCCATcgactatttatatttgtatg	GTGTTCTACTGCTTCTGTCAAT	AGACTGTTTCGTTGGGCTAAGT
GELC0476	C1_11810W_A	CACGTCTTTCAAATTAACACACACAGACAGACACGTTTAACAAATAAAGTTCTTACCAATTGACTTTATCactggatggcggcgttagtatc	GTTTGAAATTTTTATTACCATATTCATCATCATTGTTAGAATTCTTATTGGATTGATTATGCCAACTCATcgactatttatatttgtatg	AAGAAATGGGTTGTAGTTGAGA	TCCAATCCCAGTGCTTCTAGAA
GELC0478	C1_09100W_A	AAAGCTCATATTTAACATCCTTTTTTTTTCCCCCAAAACTTACATTTATTTTTGTATCTATTTTAAAAGAactggatggcggcgttagtatc	TGTAGGTTTTTGTTGATGTTGTCTCATTTTCCGATGTTGGGAAATTCAAAGTCGTTGAATCTTGATTCATcgactatttatatttgtatg	CACACATACACACAGACATACG	GTGTGTTCCTGTTGCTGTTGTT
GELC0479	CR_05540C_A	ACAGCACCTCCGCATTATCAAGACCACAACACTCAAATAATCACTTCATTTCTTCCATTGCCTTATTCCAactggatggcggcgttagtatc	TTGAGCAGGTAACAACAACAACTGGTCTGAAGAAAACCCTCATACTGTCTCTATGCCGAGGGTGATTCATcgactatttatatttgtatg	TTTAGAAGAACTGCGCGACTA	AGCTGACCATACTATTCAAAGGGT
GELC0480	C5_01500C_A	ACATTAACAATAATAGACAGTTATTGGAGTATATTGAGAGTGGGAACTAATACTCAAATCAAACGTAAAGactggatggcggcgttagtatc	CTTTGTTAGGTGAGTTGATTTGTTTGGAGAAACTATTACTGCTTTCCATTTTTACAGCTATAGGACCCATcgactatttatatttgtatg	TCTTCAAACCTTCACAACACAA	CTCCTCCACTGGCATCGTTATC
GELC0481	C2_01870C_A	TATGTTTATTAAAATTTTGTTTTCGCCATTGGAAGTTTATTTATTGAATATTCATCAGACACTAATAACAactggatggcggcgttagtatc	TAATCCAAGAATTTGATCGATTACAACATGCTTGATAATAAAAATATTTTAAAAAATTGGCTTCAACCATcgactatttatatttgtatg	AGTAATTCAGGTGTTGCGGTA	AGTATTGATCATTAATGGACGACC
GELC0482	C2_01880C_A	ATCATCCTCAACCTCATTCATCAAGTTTATATTTTTATTTTTCTTTTTTGGTTCGTAATTACTAAAAAAAactggatggcggcgttagtatc	GTTTTGGTATGGGTAATATTCTTGGTCGTCCTTTTGGTCGTTTAACAGGTGGGGTTTGATCTTGACTCATcgactatttatatttgtatg	TCTGTCTCCATTTAATTACATATATCCG	AGCAACAACAACAGATTCCAGA
GELC0483	C7_03220C_A	TCCGTTATTACTAATCACAGAATTTTATTAGCAGCTCGAAGAACACGCAAATTCGAAATCAGTTCTCATTactggatggcggcgttagtatc	GATCACATTTGACTTTTCTTCGCTTGCAAAAATCACAAACCTTTGAAATTCTGTTCCTTTTTTGACCCATcgactatttatatttgtatg	ATCCCTCAAACCAAGTCATCTT	GCTACTGGGAATCGATACTGCA
GELC0484	C3_01580W_A	ATTTCATTGTCTGTTTCTATTTATAGAGCTATATGTTCTTTAAAATTGATATTACCCACAGGACCTGGCGactggatggcggcgttagtatc	AGTTATTGTCGTCATTATTGTTGTTGTTATTATCCCCACTACTATTAAAAATAAAGTTATGGTTATTCATcgactatttatatttgtatg	TCACAATCTGAAGTCCTCGTAA	TACTGATTCGGAAGGTGCTTGA
GELC0485	C5_01850C_A	TTGATACAAAATATCAAACAGATAAAAGTCAACCAAGCTTCACACTGACAAATAGTTGCTTTAATTAAAAactggatggcggcgttagtatc	CTTTAGTACGAAGTCGTTTTTCACCATCTTGAGTGTAAACAGGATTAAGTGTATCATTAACATCCAGCATcgactatttatatttgtatg	TTCCTTACGATCCAAAGACTGT	CACTTGTTGTCCGTGCTTTTCT
GELC0486	C2_02250C_A	TATTGGTTCTTATTTTTTTTCATATATCCCATTATTATTATTATTACTAAGAAAGAATTATCTATAAAATactggatggcggcgttagtatc	TGGGGAGGTTATCTGTTTTGGAATATGGAGGTGGTGGAAGCTGTTGATTTGATATTGAAGGTGCTGTCATcgactatttatatttgtatg	ACACTGTTAAAAGGGTCAAACA	TGTCTTTGGTGTTGTGGGTGTA
GELC0488	CR_02120C_A	AAAATAACTAAGTCATCTAACAGCAAAATGTCAATCCTCATTGAAAGCGGCGTAACTCTACTCAAACGCAactggatggcggcgttagtatc	TCTTAGTTTGAAGTATTGGTTGGCCGAGTTCCTCCTCGAATTTGATACGTTTTTGTTTCTGTTTAACCATcgactatttatatttgtatg	TTGAGACCAACTTTGACTGAGT	ACTATGACTGGTGGCGATGATC
GELC0490	C3_06850W_A	TATTTACATATTTGCTTGATTTCTTTTTCCTTGCTTCAAATTTTCAAATTTCCTTTCCTTTTTACCAAATactggatggcggcgttagtatc	TCCCGACCCGTTTCTTTTTGATGTGGTGGAGTCCCTGTGTATGAGAATGGATTGAATGATCGTCAGACATcgactatttatatttgtatg	ACAGAGTATTAATTGCCGCAAC	TGTAAATGTGGTCGTGATAATTCA
GELC0491	C2_01890W_A	ACAATTTCAATACTATATATCAATACTATATATCCTTTTCATTTATTTTTTCCCCCCCTCCACTTCAATCactggatggcggcgttagtatc	CGGAGTCAACCTTCTCGGAGATAATATTTTGATGATCTTTTTCCAGTTTAATTTTAGTTTGATCAGTCATcgactatttatatttgtatg	CCAACACACATACACAAGACAA	CTGTACAAGCACGAGAACCTCT
GELC0492	C4_01380W_A	TAATAATAATTAATCATTAAATAATAACAACATTCGGTTAAGCAAAAATAATCAACATAAAAGAAAAATTactggatggcggcgttagtatc	GTTGGCTGGGAGTACTAGAGGAAGTAGATGAAGTGGCAGTTATGGAATCATTTTTCACCGGTGTACTCATcgactatttatatttgtatg	AATTATTGATTGTTACAGCCAAGC	AGGAGCAGGACGTTGTTGATAA
GELC0493	C3_06310C_A	CCCTGGACATCAAGAATTTCAACAACAGATCTAAGTCTAATATATATAAATATATTTTTTTTTGGCAGAAactggatggcggcgttagtatc	CTTCTAAACTCTCATCCAGGCAAAACTGACCGTTGGTGGTGTTGGTGGTAGTGGTGCTTGTTGTTGTCATcgactatttatatttgtatg	CTAACTTCTCTGAGTCATTTCTTCC	AGCCTTCTTACTTGATTCCTTGA
GELC0494	C3_05930W_A	TTAGTTCACAATTTTTTTTTTCACATCGCCCCACATCGGAACCATTTGGAATACTTGATAGAATTAACCAactggatggcggcgttagtatc	TCTTACGTTTCCGACAGTTTGTACAAGACAAGGAAGGTTTGTTTCTTGATACTTTATGTTCAGATGTCATcgactatttatatttgtatg	ACTTGTTATGTCTTTTCTTTCTTTCC	CGTTTCCGCAATCTAGCCAATT
GELC0495	C5_02180C_A	ATTAAAAACAACAACAGACCACCAAAAAAGAAAGAGCTTGTCAAAGCAACAGTGACCGCTGCAACTCTACactggatggcggcgttagtatc	TCGCAATATGAACAAGGTTATCCAATGAGCTCTTCCCACTATTCTGGCTACTTGCGACGTTATTATTCATcgactatttatatttgtatg	ATGCATCATCTCATTTGTTGGG	GCATTCAACACACGCCATTTTC
GELC0496	C3_02640C_A	GTCGATATTCATACAACACATTAATCTAACTTTATTCGTATCCCAGAAATTCTAATTTCCCATTATCGCAactggatggcggcgttagtatc	TGATTCTGTTACACTTTATTTTTCTTTTTCGACAAGAAATACAAGAAATTGGAAGTAACGCGGAACTCATcgactatttatatttgtatg	ATGGATGAAATAGGTTGTTGCC	TAGTATTGATGCCGAGCCACTT
GELC0497	CR_06240C_A	ACTTCTTTAACTTGTATTTTCTTTATCTACCCCAGATTTTACAAAAAAATAAAAAGAGGACCAAATAGAAactggatggcggcgttagtatc	GATCATTTGTAGTAGTTGATTTTCGTTTTTTGGAAGTTCCAGGAGTTGTATCAGGTGGTATTGAAACCATcgactatttatatttgtatg	ATGACACGAAATGGTTGATTCC	CATCCCACTTATTTCACCTTCGG
GELC0498	C3_01220W_A	AAATTTAACTGAATATTTAAATCGTGAAGGAGCTTTTATATTACCACCAATTTCTGAACAACGACAATTGactggatggcggcgttagtatc	ATGAATCTTTATTATCAGATATTTCAATAACGGGGAAAAATGGATATATTTTATTAATGAAAATTTCCATcgactatttatatttgtatg	CTGTTGTTGCCTCTGAAAATCA	TGACATCGTTCTCTTATAGGTTGGT
GELC0499	C2_00720C_A	CATAATATTTCAAAGAAAAGTTATCATCTTAAACCAACAAGCCCTAACACTAAGTGACCTACATTAAAAGactggatggcggcgttagtatc	CACCACAGTTATTCAATGCAGTTGATGAGTTGGTAAGCTTTTCATCAGATACACTTAATGTGGATTCCATcgactatttatatttgtatg	ATGTGACTAGTTTGCAGACAGA	GAACACCCGTCGTATCCTGTAC
GELC0500	C3_07200C_A	TCTGGATAAACTTGTAAACAAATTCATTATCATTAATATCATAATCTTCATTATCATTTTCATTTTCGCAactggatggcggcgttagtatc	CTTTTATTCGTAATTTTTTACAACTTAAACAACCATTTCTTGATCGTTTCACCGTTCTTCTTTTAGACATcgactatttatatttgtatg	CTCTCTTTTGGTGATAACAATACTCA	TCACATGTTGGTTTAGATTCATCACA
GELC0501	C1_04510W_A	TTGTTAGTATTCATTTTTCATACGTTCTTAACAGTTTATTTATTATATTGCCGTCGTTTTTTCAAATGTTactggatggcggcgttagtatc	TAGCAGGTAAGGGAGTGTTGCTCCTCAGCTTTCTCTTCCTCAAAGATTTTCCTGGATTAATAAATCCCATcgactatttatatttgtatg	TCTGTTGGCAATTATTCGTCAA	CCATGGACTTGAGGAGGGGATA
GELC0502	C1_04560W_A	TTCCTTCAAACTGCTTAATTTTCTTTTCCTGTTACTTTGATTTGTTTTGTCAAGAAATATATATGTATACactggatggcggcgttagtatc	TTCCTGATTGGTTAAGGTTTGTTACCTCGGTTGATAAGGTATCTAATAATGCTGTGCTAGTTGTAGTCATcgactatttatatttgtatg	AAATGTGGATCGAAAGTTTGCT	ACCATTTATCCGAAAGCTTCAGT
GELC0503	C4_03160C_A	TTTCATTGAATCATAATATAGACAAAAACAGCTTTGTGGATTGTTGTTTGACAATACTTCACAATTTATCactggatggcggcgttagtatc	TCACAGGTAACTGGTTGTTGTTTGCTAGAGGATGGAGAATTGAGTGTTGCCGCTTTGTTTTATCTTCCATcgactatttatatttgtatg	TATTGGAGTTGGATGTATGGCA	GCCCTGAAGTAGCTTTTGTTGT
GELC0504	C4_06820C_A	CAAACATTCAAACGAAAACTATCTGGTATTTAATTTTCCATTTTCAACATCAAGTGTTTAAATATCAACAactggatggcggcgttagtatc	GTGATTGACGAGAGGTATTGGATTTACCATTGTTAGGGTCATTCCAATTGATATTGGGTATTGAACTCATcgactatttatatttgtatg	GAATCTTTTACCCGAACAGCAT	GCTGTAATGGAAATGGTGGACC
GELC0505	C4_04730W_A	CAACGTGTACTATCTATTCTGTGTATTTGTACACCTATAAATAAACAATATCAATATACTAGACAACAAGactggatggcggcgttagtatc	CAATATGAACTACCCGTTTTCGAACTGATGAGTTTGATGTGTCTGAAGCTTCATTCAGAGGCGAGCTCATcgactatttatatttgtatg	ACACGATTTAGGAGGAGTCAAG	ACACCATCTCTTCCGACATTCC
GELC0506	C3_04530C_A	TGTTTTTTTTTTTTCCCTTTTATAAATTATCCGTTAAGTTTACCGCTTTTTTTTTTGACTATTTTAAATTactggatggcggcgttagtatc	GCTTCTTGCCTTTCTTTTGTCCATCGGCATTTCTCACGGGAGTAGCACTAGGAGTAGCTTGCGACATCATcgactatttatatttgtatg	TAATACCTCACACCAACTCACA	TTGGTTGAGACTAGATGGAGAC
GELC0508	C1_12130C_A	TTTTCAACTAGGAAAATAACTAATAGTCTTGATTAGCTGCTAAAACATCTACTATATTGAGGGTCTTAGAactggatggcggcgttagtatc	TTACCTTTGATCTTTTACAGTTACAACACGGTTTGGTTCGTTTCTCCTTTTTGTCCTCCTTTGGTGGCATcgactatttatatttgtatg	TGCCCGTTGAGTACTATTTGAT	TGACGGCAAAGGACCTGAATTA
GELC0509	CR_02640W_A	AAGGCAACCCACCAAATAAACAAAGTATTTATTTGCAAACCATCACACCATTAAAAATAATCAATTTATTactggatggcggcgttagtatc	CACTACCATTAGTTATATCATCATTTGTGTGCATGTTATTATGAGTTGAATAGTAGATAGCAGTAGACATcgactatttatatttgtatg	ACACACACACACATTTTACACA	TGGATTGATAAGTGTGGAGCTT
GELC0512	C1_13640W_A	CACCAACCACTAATTTAATTATACCAAAAAAAACTGTTGTAGTAATCACTGATTTTTATTTCTTGGAGAGactggatggcggcgttagtatc	GAGTGCATGTGGTGACACGATGACCTCTGATACATCTTTCACAAGCGTATTTGACTCCTTTGATCAACATcgactatttatatttgtatg	TTCAATATGCACATGTTCACCC	TCTTATGACAAGCACATGAAGGT
GELC0513	C3_07860C_A	AAGCGAGGGAACTTGAAAAATTGCTCAACTCTTATATAGCAAAAATAAACAACCAATAGCTTCTTCGCCAactggatggcggcgttagtatc	GTCGGTTACATTTGATTTTACGTGACCGACACGCGTCACAGCTGTAGATTGTACGATCACGTTTGGTCATcgactatttatatttgtatg	GTGCTACAATCCATGATCAACC	TCGACTAGTGGTGTTTGGTCAG
GELC0514	CR_03890W_A	GAACATAGTATCCACCATTTTGTCCACAATCGCTACAGCCTCGGGTGCTTATTACTTAAAACCATTGACAactggatggcggcgttagtatc	TATCTTGGGATAATTGTTGGTGATTCACATTTGCATCCAATTGTTGTTGGTCCAAATATGTTTGATCCATcgactatttatatttgtatg	GGTTTCCTGATACTAATTGTTGCT	CGAAGGAGTTACTCGTGGTTGA
GELC0515	C5_01810W_A	ATTAGTATTTTTTTTTTGGTAGAAGATCCAGTTCACTTGCCCTTTTTCATTTTATTTACCCATTAAAATAactggatggcggcgttagtatc	AGTTGGTAAATGCTTTACTTTGAGACCAATCACCATTTGGTGTTGTTGAATTTTCTGTCTTAAAATTCATcgactatttatatttgtatg	TTTCCGATTACACATTTCCACC	ACCACTATTCGACAAAGCAAGG
GELC0516	C3_06790W_A	AAACCATCTTTGTATTTGCCCATACCCATATATCTATAGACAGTATTGTTGTTCTTGCCACATATTAATTactggatggcggcgttagtatc	CTTCGGGATCCAACTCTTTGTTTAGTTGTATAATAGTAGTTTTCAAAACTGGTGGTGAAGGTAAACTCATcgactatttatatttgtatg	CCCACGTTGCTTCTATTTCTAT	TCGATATTTGCAGTTGATCTTCGT
GELC0517	C1_10570C_A	TGTGTCACTAAATTACTTCTTATCGAACAAGCCGTGTTTACATAATTCAAACTAAAAGAACATCACCTCCactggatggcggcgttagtatc	CGGGTGGTAATTTTGATGATTTAAGAAAAAAATCGACATTGACATCTGTGTTTTCGTTTCTGTTTGTCATcgactatttatatttgtatg	ACCTCCCTTTCCACTTTTATCA	GCGACAACTTCTCTAATCGGTG
GELC0519	C4_05700W_A	TCTATCAAGACCTTTAGAACACTTTTAACTAAACTACCTGTATCACTGTCCCCTCATATTTAACAAAACCactggatggcggcgttagtatc	TAGGGTTGGCTTTACCAGTCTCGTTGGTAGACATAGAAAACGAATTGGAGTCACTAGCTTCAAGTTCCATcgactatttatatttgtatg	GTCCCCACTAGATTGCAATTTT	TGCTAGATTTCTTACCACCACG
GELC0523	C1_01860W_A	TTTTTTTTTTATTGTGTTTGTTTATACTACCCTTTGCATATATTACTAATATTTATCTTACCCTTTCATCactggatggcggcgttagtatc	TTAAAATGGTGGTGTCATCTACTGCTTTTTCAAGATTAGATACAGTAGATCTTATTTCCTTTGTATCCATcgactatttatatttgtatg	TTGAGCTGTCTAGTTTTCCTGA	TGTTCCTGTTCCAGCTGCTATT
GELC0524	C1_05140W_A	TTTCAACGTTATTTCTCCATCCATACTTGTTACATTATAAATATTCACTACTATTCCAGAAATTCAAATTactggatggcggcgttagtatc	GTAAACGAATACGTGCACTGGTTGTTGTTGCAGTAGTAGTAGATGAAGATAAAGATGATGAACTGGACATcgactatttatatttgtatg	CCCTTCCAATTTTATATAAATATCAGGTC	TTGGTGGACATTTGAAGGGTGT
GELC0525	C1_06130C_A	TCTGATATTTGATTAACTTTGTTTACTTTGTTACACAAGTTTTACATATACTACAACAACTTACAAAAAAactggatggcggcgttagtatc	AAGTTGGTGTAGCAACAGATAAATCATCTATATTGGAAGTAGTATTGGTGTTATCAACAGTTAACTCCATcgactatttatatttgtatg	ACTTTACACACACACTCACTCA	CATGAGCTGCTCTTCTATTTCT
GELC0526	C1_06280C_A	TATCTTCACTCCAAACATCAATATCCTCAATTTACTTCCAATTAGTTTTATTTTTTAATCCACTGTATAAactggatggcggcgttagtatc	TTGTATCTTCTCCATAAGGCGAATTTGGTGCTGAAGAAGTTGAATCGGGTGTAACCATATGGGTAATCATcgactatttatatttgtatg	AGTGATTACCATACAGTCGTTCT	TTGCATAAGGTTGAGCTTGCTG
GELC0527	C1_07670W_A	TTTGTTTTATAAACTAGGTTTAATATTTATTGTCTATTTATCAAAAAAAAAAAAAGCTTGCATATCATTTactggatggcggcgttagtatc	TCTTCCGACAAGTTAAACAACCAGTTTTAGATCTTGTTCGTTTTATTTTCCCAACAGTAGATAGTTTCATcgactatttatatttgtatg	CTACTGGGTATAAATTTGCCGC	TTCAATAGTGTTGTGGTTTTGTT
GELC0528	C1_08940C_A	TCACAAGTTTGTCCTCTTTTTTTTTGCTTCTTTATCGAATAATACCCACCCACCACCAACTTGAGCAAATactggatggcggcgttagtatc	GGATATTACTTAACATCTGTGAATTGAAATAAGGTGTTGTTTCAAATAAAGGTTGGAATTCTTGAGACATcgactatttatatttgtatg	GAAACACACGCATCCTTCTATA	GTTCTTGCTGTTGTTGCGACA
GELC0529	C1_09380W_A	GCCTACGTCAAAGACTCAACTCTTGCCCTCAACGTTCACCGACATGCAATACTTCTAGTAAACCAATCCAactggatggcggcgttagtatc	GTCTCAATTCATCACCTAAATCCAATACACTGGATTGTTTTAATGGTATAAATAATAAGTTTGTATTCATcgactatttatatttgtatg	AGTACAACAACTGATCTTTGCC	AAGCCAAAGTGTCAAACCAAGC
GELC0530	C1_11520C_A	AAAAAATTTCAAGACTGAAAAAAAAATTTTTCACTTTGACTTTCTTTCATCAATCATAGTATCATTCAAGactggatggcggcgttagtatc	AGGCGTGAGTTGTTTTTGGTTTCAATGAAATATTCAACACCTTTTGATACGATCTATAACTCAACTCCATcgactatttatatttgtatg	TTTTGCCATTTTCGCTTAGTTG	GTCTGGCCAACAACAATCCAAG
GELC0531	C1_11690W_A	CACATTCACATAACCATACACTTGCACATACACATACACATCTATTCCTATTATCATAGTTCATACCCTCactggatggcggcgttagtatc	GAGTTTTAGTTGTAGATGATGTAGTTCTTGATGAAGATTCCGTTCTAGTAGAAAACGTTGGTGAATACATcgactatttatatttgtatg	TACTGCTATTATTCCTGACGGG	GTTGCTCCCGTTATTCCGATTG
GELC0533	C1_13960W_A	TGAGATGTCAGAAACAGACCATTCAGAAACTAGTGAATCCACCATTGAGCCATTTCAATTTGAAAAAGTTactggatggcggcgttagtatc	ATAGTGTACTATAAGATAAGAAATCTTTGGATTGTAATGCGTCTTGAGCTCCAGATTCCAAGTTTTCCATcgactatttatatttgtatg	ATGTGCTAGTTTATCCCCTCTT	GGAGTCTCTGATAGGCCCATTG
GELC0535	C2_01700C_A	GACCAGAAAAGATTATTACATCAAGAACCCCCATTTTTTTATTCTATCAGTTTATGATAACATTATCGGAactggatggcggcgttagtatc	TTTGTTTTATCTGGATAGAAGTGTCAGATAGACTTGGTTTATTTGGTTCTTTATTTATCATCAGAGACATcgactatttatatttgtatg	TGGAAAGACGGAACAAACAAAT	GCTGTCAAAGGGGTTATCAAAGG
GELC0536	C2_05640W_A	CAAATTTAATTATCATCAACATTCTTTTGTCTTTTTTTTCTTCTTCTTTAGACAAGATTATATCCAAACCactggatggcggcgttagtatc	GATTTAAATTTGGGTCTTGGTGAGGTTGGTTAATGTGTTGTGGTGGATAATGCTCGGGTCTATTAAACATcgactatttatatttgtatg	TATACCATCCAGCGTATCCAAC	TACTAATGGTGGCTGCTGTTGT
GELC0538	C2_10660W_A	AGAACCTAAAAAAAAAAAGTAGTCAACATTGTCGAAGCTACCAAATAACCACAGTAATACTATTAACGATactggatggcggcgttagtatc	CGAAACTTCGAGATCTAGTGTGTGAAGGGCCCATATGATGATTAAACATGGCTGACTGGACTAAACTCATcgactatttatatttgtatg	TTTTCCAACAAATTCCTCCTCC	TGATCTTAAGTTGCTTGTTGGCT
GELC0539	C3_00750W_A	AATTTATGAAAGGCATCATTATTTCTTTCCATAACTCAAAACCAATTACAGTAATTGAAGATAAGATCAAactggatggcggcgttagtatc	TGGTGGTAGCTTCTTGTTGTGAAGTTTCTCCTAATGGTGATTTTGTGGGGTTTGGGCTAGATGAACCCATcgactatttatatttgtatg	TTCAGAAACAATAAGCGAGCTG	TGGTTTCGTTGGATAGACACAA
GELC0540	C3_02220W_A	CCAATTAGTTCAATACATTCTACACCAAGAATTAAACAACCATTTTCAACTATCCTTATTCCCATAAAAAactggatggcggcgttagtatc	GAAGTTTCTTGGTATCATCTAGATTTGCTGGTGAGGCAATATCTGAAAAATTTCTTTTAATATCTGTCATcgactatttatatttgtatg	TCATTCTTTCCTTCTTTTCCATCT	ATCCAGAAAATCGCTACCACCA
GELC0541	C3_05170W_A	ACAAACAATATAATTAATTTTTGCAGTTTATTCCCAAATTACATATACACATAAATTGACTAACATCAGCactggatggcggcgttagtatc	TAATGTTTGAGCTTGAACCTATTGATCCAGTACGGTTGATCAATTCTGAAACAGAAGGTAATTGTGTCATcgactatttatatttgtatg	TCGGTTCCTACTTTCTTGTCTT	GGACTTGGTTGTGAAAACTGGA
GELC0542	C3_07560W_A	CAAACTCATTCACTAACCCTCCTATTAATATTCTCCATACATTCAGCTGAACAATATTTTCAATACTAAAactggatggcggcgttagtatc	TAACTGCTGTTGGTGCTGTGGTTGTTGTTGCAGTCGATGCTGATTTAGCCATTACTGGTGATATAGGCATcgactatttatatttgtatg	TCACTTCTTCTACAATTGAATCGA	TCAATTGCTGCTTGTGATCCAA
GELC0543	C3_07790W_A	TGGTGAGATAAAGAAACCTCAGGAAAAAAAAAAAAATTTTGTGGTCACACTGTTGAAGAAGACGACGACCactggatggcggcgttagtatc	CATTATCTTTGAATACTGTAGGCGTCGAACTCTTCTGAGTCGGGTTATTCGTAAATGGTGAACCAAACATcgactatttatatttgtatg	TTTTCCGAAGATTTACGCTCAC	ATCCTCTGGTATTGTGGCTGTG
GELC0544	C6_04350C_A	TCATAAACAAGTACTACCAGAAAATGAACCGACATCAACAACAACAGCAACTCCATCATCATCCAATACTactggatggcggcgttagtatc	GAAATTGATGTTTGACCAAAAAATCCAAAATCAACGAGTTTAAAACCTGTTTAGTTGTGTTGGGAACCATcgactatttatatttgtatg	ACTGGCTATCTTACCCACTTTT	AAGAAAACTTGCCACCATTCCA
GELC0545	C4_04850C_A	TGGCCACATTCATAATCACGATCACAGAACAGATTTAGAGAAAATAAATACACAAATAAATGATACGTCGactggatggcggcgttagtatc	TGCAAAAATCCAAGTCGTCCAACGCAGGACATGAAAAGTTGAAATTGGGTTGATTAGAAATAGGTTCCATcgactatttatatttgtatg	ATGGAGCTCAGGTTGAATTTTC	AGGATCATCGCAACACTCAAGA
GELC0547	C6_03400C_A	ATTTTCAATTAATCAACACATCCTTTGAAGAAGTCTCTTTAGCAAACAACAAACAACAAACATATCAAGTactggatggcggcgttagtatc	TTTTTGATAATGTTGGTCTTGCTAAAATGAAATTAGCTGCCTTAACGACAGATGTCATAGATTGAACCATcgactatttatatttgtatg	AAAACTAGACCAATGCGCATAG	TCATCTTCTTCAGGTTTAACAGCT
GELC0548	CR_10650W_A	TTTAACGCGCGCATTGAACAAAAAAATTTTTTTTTTTACAACTCTATCCATCTCATCCCTATCTACAGCCactggatggcggcgttagtatc	TTGCATCATCATGAGCTCTATGTACAACATTGAATGTGGTGGCGGTTTTCTTATTGAATCTTCTAGGCATcgactatttatatttgtatg	CGTGCTTGCATTTAAATTTGGT	TCATACTTTGAGTCGTCGTAAG
GELC0553	C2_07750W_A	CACAACCAAACAATAAAGTCATATAGATAATACAAAGCTACAAATCCTCCTCCCCCCCCTAAACAGATAAactggatggcggcgttagtatc	ATAGTAGTGACGTTTTGCCACACGCTCCGTCTCCAACAATAACTAGCTTTCTTCTAACTGATTCTGACATcgactatttatatttgtatg	TGCTTTCTTTACGGGAACATTT	TGCAATCAAAATAACATGGGAATTGT
GELC0554	C5_04900C_A	AAAAAAAAAAACAGAGTAAGCAAATACAAATACCCTTTCACAACATCAACAACACCTTTTAATACAAACAactggatggcggcgttagtatc	CTGTAGCCTTATTTTTTTGGGTTCTAGATAATTCTTCTTGAATTTGAGCAATTTTCTCAAGTATCCCCATcgactatttatatttgtatg	ATCCAATAGATTCGGCAACTTG	AAGATCCTTGACCTGGTTGTGG
GELC0555	CR_08700C_A	ATAATCTTTCGGTTCACACAAAATCAACTGATTTTTTGTCTAACAGCTCTAATCAAGTATAGTTATCTACactggatggcggcgttagtatc	CAACCATCAATATTCTCATTTCACGTCTCCCCAAGAGACTGGCAAATAATTTTGAAATTGTTAATCCCATcgactatttatatttgtatg	ACTCCAACTCAATTCCAAATGC	TCTGTCCCGGTCATTTGAATCA
GELC0557	C7_02300W_A	AATTCCACAACCATCGTGAAAAAAATAACAAACTATTTCATCCCCCCAAAACAATAAGATTAATCACATAactggatggcggcgttagtatc	CCTTTCTGGCGGCTCCAACTTGGATAATTAATATTAGTAAAGAATATAGTAGTGATATAGTTTTATTCATcgactatttatatttgtatg	GGTTTCCAAAGGTAGGTGAGTA	GGTGTTGTTGGTCTTTGAAGGG
GELC0559	C1_05070C_A	CAAACCCCAACATCGACAACATCAAAAAACACTTGTTTCCTAACCCCTTCTAACAACTTCACCTTAGTCAactggatggcggcgttagtatc	GAAATCCAATTATATTGATTATAGTCAAAGAGACTTGAACAACCCATCTAGAATTTAGTGAACCGGACATcgactatttatatttgtatg	TCATATGTTTCTCCTTGGCTGA	ATGAGTTGAACCCCGGAAGTAC
GELC0560	C4_04050C_A	TTTTTTTTAATATTCTTCTTTTAGTTCATTATAACAAAAAAACAAATTAGTTATACCCATCAAATCAAACactggatggcggcgttagtatc	CAAATAATTGAATGGATGAGATGGTAGCAAGAGCAGAGCTAGACAAGGATAAAATAGCAAGGAATTTCATcgactatttatatttgtatg	CGCACAAAATCTCCAACTAGTT	GTAAACGTCACCACCCAAAGT
GELC0562	C4_03520C_A	TCTATCCCATCAACAAGATCAAACAAAATACAAATCTCGTATTAGTCATTCGCTTTAATTTTTATCAACTactggatggcggcgttagtatc	ATGGGAAAGTAGCCTCAGTGGATAAAATGTAGTAAGCGAGGGCAGCGAGTTGGGCAGTTGCAAATCTCATcgactatttatatttgtatg	TTCGACCTTGGAATGTTAATGC	CATTTACACCAGCGCTTCCAAA
GELC0563	CR_04900C_A	TCTTATTATTATTCTGTTAATTCAAATTTTCAATCTCTTTACTTTTTACTTCAAAAAATTTTTTTACCCAactggatggcggcgttagtatc	AATCTTCAAAAGCAGCAGCGTTAATGGCAGTAGCAATAGATAATAATAAAGTGAAGGTAGTAGCTTTCATcgactatttatatttgtatg	GGTGGTAGATGATACTGAAACTC	ACAGAAGCAGAAACAGAAGCAG
GELC0564	C2_03720W_A	GTTGTTATAACCACTACTAAACTACTACTACAGTATTAAAGATCAACAAAGTAACAATTTTATATAAAAAactggatggcggcgttagtatc	TGCCACCACCACTTGTAGCATAAATCAAATTGGAAATTATTAAAATGTATACAATTTGGAAAACCCTCATcgactatttatatttgtatg	TCACATATTCATACTTACATTCACAC	AAATACCACCCATTGCAGCAAC
GELC0566	CR_02750C_A	TTGTTTTTGTTTTGTATACCAATTCCTACCCCCAACAACAACCCCACTCCCCAAAATAAATTTATAAGAAactggatggcggcgttagtatc	ATGCATCATCAGCCATAACAGTAGGAATGATTAATAAAATAGATGAACAAATTAAACTGGTGAATTTCATcgactatttatatttgtatg	CATCTCCTTCCTTTTCCTCCTT	GCAGAAAGTTCAGAAGCAAGGG
GELC0567	C2_00080C_A	TGAGATGTCGCAGTATATATATCGTTGGGTCGGACTGTGATAGTTGAGGGTGGGTGTTGGCACCACAGCAactggatggcggcgttagtatc	CTGTACGCACATTAGCTGGTGCACTCAAACACAATGGTAGAATCAACACCAATATTCCAAAACCGTGCATcgactatttatatttgtatg	AAATGGGTTGTTGTCTAGGGA	ACGAACTGGTGGATAAACTGGT
GELC0568	C5_00410W_A	TTTTTTTTTCACTTTTGTTAAATTATCGCACTGCAAAAACTACAACCAGACAACAACAACACTAAACAAAactggatggcggcgttagtatc	GCAGTACTAATAGTAGTACTAGTAATGCTTGTAAATTGCAACAATTAGTGTGGTTGTATAGTACAGTCATcgactatttatatttgtatg	AGGTTGTAATTAGTTGAAGGGGT	GGCGATGAAGAAAGAGAATGCA
GELC0569	CR_02290W_A	AGTTGTAATTTTCATTTTGATCCTGTTTTTCTTTATCACAATTCATTTGTTGTTAACTTATCAAAAAAACactggatggcggcgttagtatc	CAGATGTACCATCTTGAGCAAATACTGTATATGATGCTATAACAAGCCAAGCTAAAGTCGAATACTTCATcgactatttatatttgtatg	GCTCTTGTCCTTTCCTTGTCTA	TTCTCATGGGTAGTGGTTGGAG
GELC0571	C2_09130C_A	CGATTTTTGTTTCATAAATCTATTCATTAGGTGACAAATATAACAAAGAAAGAAGAAAATATAATTGAAGactggatggcggcgttagtatc	GGTAAATGTCAATAGCATTAATTGCATTGAATAATACGAAAAATGGCAAGAATATTTGTTTCAATAACATcgactatttatatttgtatg	TGCAATGAAAGATGGAAGCAAA	CTCCTAATAATTCAACTTGTAATCCA
GELC0572	CR_10480W_A	ATACATTTTTCATTAGAATATAGATTTAAAGTTCCGTCCATTTGTTTATTGAGTCGTACATTTTCAAAAGactggatggcggcgttagtatc	TTTGATTTGCCAATGCAAATACACATGCCAAATAACACGAAATTATGATTAGAAACTTGTTGAAATTCATcgactatttatatttgtatg	TTTTATTGTGTTGCTGCTCCTC	AAAGAACCCAACCCGATCTCTC
GELC0573	C4_01350W_A	TACAATCAAACTCATTTCAAACACTACACATACACATACACGTACACATACACAAACATATATTCATATAactggatggcggcgttagtatc	TGACAAAATCACTTAAAAATAAAGTAGCCAATAATAAAGATGATAATAATAAGTTAGTTGTGAATTGCATcgactatttatatttgtatg	TACACAAAGCAAAGCAGGAAAA	CACTAGTGGAATTATGCATGGT
GELC0574	C7_03290C_A	CAGATCTTTTAGTTAAATTTCCAATTGTATTATCAACAACAATTAACAACAGCTGTTTTCAAAAACAAAAactggatggcggcgttagtatc	TGATAACAAGAGCTAAGACAGAATTAAGCAAAAGCCAAAAAGTGAAAAAAGATTTCCGAAAGATTATCATcgactatttatatttgtatg	AAACAACAAACAACACGAAACC	CAAAAGGGGTGAAGTCAGGGTA
GELC0576	C4_01000C_A	GAACCTTCCTCTCCAAATATTTTTTTTTCTTATTTCAATCTCATTCCATTAACTCATACAAAAATCAATAactggatggcggcgttagtatc	GATCTGAAATAGATACACATATAATTTGTGAAATAAATGTAAATAAAATTATTAGTTGAGTAAATAGCATcgactatttatatttgtatg	TGGGTTCGGCTTTAATAATTTGA	TAGTTCCACTGCTAGACCCACT
GELC0577	C4_00120W_A	CGGGTTTAACGTTATATAAGGGTAAGAGATTCCTATTTTTTTTTTTCATCAGCTCCATATCCACACTAACactggatggcggcgttagtatc	TTGGGTATGTACCAAAGTTACCGTAATCAGCAGCAGATACTAAAAGAATCAAGTAGAATATGAAATGCATcgactatttatatttgtatg	CCTTATTATCATCAGACAAGGGA	CCAACTAAACCAGCCCATTGTG
GELC0578	C4_00130W_A	GCATTTTCCATGACTTCCGTTGTTCTGAATTCTAATTCTTCACTAACTATCACTAATAACTAATACTACAactggatggcggcgttagtatc	CTTCTGGGATAGCAGTGACACCAGCAGCTGAAGCAATGGAAACGATTGACAATAAGGATAAGGCGAGCATcgactatttatatttgtatg	CGGACTACTTTCTGACTGGATA	TAGATTCTGTCAGCGAAACCGT
GELC0579	C1_03190C_A	TCTAATTAAGTTCATTGGCAATTTCAATCTTTATTGATTTATATAACTACTTCATATAAATTAGATTACAactggatggcggcgttagtatc	AATACATACTGTTGGCTGCAGAAGCTAAGCCAGCAATGGCAGTAATAGCAAGAATGTTCTTGAATTGCATcgactatttatatttgtatg	TGGCTCTACTTGTCTGAAAATG	GCCGAAACCAATTAATCCCAACA
GELC0580	C1_04190C_A	CCACTAAAGCCACCCAACCATCCAACCATCAACATAAATTCCCTATAGTTTCTTGGTGTTTAGACTATACactggatggcggcgttagtatc	ATACAATAAATTTATATTTTCTCAGACGTGGGAACAAATTGGAATAAGGAAATAGTCGTTTCGATAACATcgactatttatatttgtatg	CCATGGTGTTTTACTGCATTGA	TCATTTTCATTCTCGTTGGGCA
GELC0583	C7_03390C_A	AGTGGACCCAATTGAATAGAATATCTCAATAGATTATAAATTACTATCCTCATTCTCAATTTAACAGATCactggatggcggcgttagtatc	CTATTGCTATACAGTCTTTACCAATCATAGCTACTGCTGCACCTCCGTTAATTGAAAATGGATCCGACATcgactatttatatttgtatg	GAGATTTTGTACAAGTATCTTCATTG	ACCAAATTTGCCAATGTTGATG
GELC0586	C3_05560W_A	AAAAAAAAACTAGTGGCAAACCACCTTAATCAACAATTTCCTAACATCATCAAACATAGCATAATCAACAactggatggcggcgttagtatc	CCATAATTGAAGTACCTAAATTCACTTCCCCCTTTTTCAAATGATTGATGTCTACTGAAATACCGTTCATcgactatttatatttgtatg	TGTTGTTGTTGTTGTTGAATGG	CCAGGAGGCAATTGTGATGAAT
GELC0587	C3_02450W_A	CTTCATCTTCATTTTAATTATACACTCAACCTACGCGTACACACTTTACACATATACATAACCAAGAAATactggatggcggcgttagtatc	ACGTTACATAAATAAATTCAAAGTATACAAACATACCATCAACGTCCATGCGATCTTGATCGTCAGCCATcgactatttatatttgtatg	GAGGAAAAGAAGGAGGAACAGA	GCATATCCCATGACCAAAACGC
GELC0588	C4_06880C_A	GAACGAGGAAAAAAAAAAATGTCATGAGTGGCAACCACTACTTAGTCAACATCAAATCAATAGTACCATAactggatggcggcgttagtatc	TGAGACCTGATGTATGTTTCAGAGGGATTGTAGTAGATGGTTTAGAATCTAGTTTGGTGGCGTCTGACATcgactatttatatttgtatg	ACAATATAGCCCAGCCTGATTT	AGACACTTCATCTTGACCATCA
GELC0599	C2_10530C_A	GACAACAAAACAAACAAAAAAGAGAGCACAAATTTTTCTTTCACACCACATCTTTTTCTTTCCCCCAGTGactggatggcggcgttagtatc	CTCGTCGTACAGTACCAAACGATCCTTTCCCAATAACCTCAAGAGATTCATATTCATCGATAATCGACATcgactatttatatttgtatg	GAGTGGTATGGTGATGGTTTTG	AATAACCTTTGCCAAGTCCCCG
GELC0600	C7_02220C_A	CCTGCTCCCCACGCATACACGCTTCATCCAACATCTCACCACCACCACCACTACTATCACTATCACCACAactggatggcggcgttagtatc	GTATGTTTGGTTGTTCTTGGTGGAAACCATTTGCAGTGGTTATGTTTTTGGGGAAAGAAAATGAACCCATcgactatttatatttgtatg	TTCCGAGAAAATTTCCCATTCC	CAACAACTTTTGAATGTGATGCA
GELC0601	C2_07210C_A	TCACATCACCAAGCTGCATCAACTGAATCAATCCAATTCGGACAGTAATTCCTTAAACTCAAACACATCAactggatggcggcgttagtatc	GCTGCGGTTGTTGAAATTGTTGCTGATATTGCTGATGCTGAAGCTGCTGTTGTTGTTGATGATTGTCCATcgactatttatatttgtatg	TTTACAACCACCAATTGCCAAA	AACAGTAGAACGTTCAGGCAAC
GELC0602	CR_06000W_A	GCTAAGTTTTACTCACTATTCACTATTACCCACTTTCTAATATAGCACAACACAGTTTACATATTAAAAGactggatggcggcgttagtatc	AAGCAGTGGCAATATTGTATCCTGGTTGCTGTTGTTGTTGTTGTGAATGTTGTCCATTTGTTGAAGTCATcgactatttatatttgtatg	CACACACACTCAACACACATAA	TGGGTCTGAAGTTAACGTCGTT
GELC0603	C2_06670C_A	GTTTATTTATAAACAAATCTTAACTTCTTCCCCTTTTCACCATTTTTAGTTTCCATAAGATATATAAATCactggatggcggcgttagtatc	TAACATCCTGTTGATGTGGTTGATAATGATGTGATTGATGTTTTGGTGATCTATTGAAAAAATTTGTCATcgactatttatatttgtatg	AGATCAACAATATCCCACTCGT	TGATTTGGCTTGTTGTGGAGAA
GELC0604	C2_10700C_A	AGAGGTTGGGGATAGGTTAAAACGAGATCTCGAATTTTTTCTTGCCTTTCTTTAACTATCTTCATCAACCactggatggcggcgttagtatc	AATGTTGTAGTTGTGGCGACAAGCTACGGAGCATTTGTAGCAATTGGTTAGCAGCATCGAACGAATCCATcgactatttatatttgtatg	TCCACTGTTGACATTCTTTCCT	AGCCCTGTACATATGCTTGTTT
GELC0605	C1_14010W_A	TCGTATCCATATCAATTTGAAAACTTTGCAGCCGCCAAGCGAAATCCATCATTTACACTATCAACAAGAAactggatggcggcgttagtatc	AGTGATTTTCGTTATCGGTATATGTCGAACATGCTTTAAGGTGATTGTTTTTGTTTTTGAGTGTAGCCATcgactatttatatttgtatg	TAAAGATAATGGGTCCTGGCTG	AAGCTCTCGTATTGCCCTGATT
GELC0606	C3_03850C_A	TCCATCCTAGCACCTTCATAATCCATTCTATATATTTGCTTCTTTATTGTCTACAGTCATTTCCGTTGCAactggatggcggcgttagtatc	TCCTTTGTTGCTGTCTTGGTGGTGTTTGTGGTGTGACAAATAAAGATGGTGTATCATTAGAAGAGGACATcgactatttatatttgtatg	CATCCATATTTCTTTGCTGCCA	GAGGGGTGATTGGAGTAAAGGG
GELC0607	C6_03920W_A	CCTACTTACAGTGTCCTGGTTTGACACTTTTATTATTCATTTTATTCTGGAATTCAACTTTTATTAGAAAactggatggcggcgttagtatc	TTTGTTCAGGCGACAAACTCAATATATAATCGTTAGGAGTAGCTGCTGATGGTGGTGCTATGTCAGTCATcgactatttatatttgtatg	TGCTAATAATGAACAAGGCGTG	TCCGATGATGTTAACAATCCAGC
GELC0608	C3_02100W_A	GGTTTTTGTTTATCGAGCAACTATCACTCATCAGTGTATTTTATATTCATAGGAGAGATATACAGCTATCactggatggcggcgttagtatc	AATTTATATATGTTGACACTTGGGCGGCATCCCACTGTAGAAAGGAGTCGTTGCTAATTGGTGATGCCATcgactatttatatttgtatg	AAGCTGTTTTCTTGTTTGACGA	TGTGCTGCAATAAGATCACTGA
GELC0609	C1_06360W_A	TACTTAACAAAAATTATCACCAACAACTAATGATTAATATTTATTATCAAATAATATAATAAAACTAACCactggatggcggcgttagtatc	TAACTATTTTAGTATGAAGTTGAGAAGTTAATGTAGAAACTTCATCTTCCATATCAAATATATCTATCATcgactatttatatttgtatg	TGTTGTTGTTGTTTCACGTGAT	TTGATGATTTCCTTCGTTGTCT
GELC0610	C1_10950C_A	AAAAATTTCTTAGGCTTAAAAAAAAAATTTTGGCAACCTCATCAGGAATCTAACGGACAGAATATCAATAactggatggcggcgttagtatc	CACTATCTGAGTCAGAAGAAGTATTGAGATGTATATCTTCTACTCCTTGCAAAATTTCTTCTGAAGACATcgactatttatatttgtatg	TGATGCTTGACAAGGTATGGAT	ACTTGTTCAACTGTAGCCCTGT
GELC0611	C3_02720W_A	TAGGTTTTCTTTTTTGTTTCTAAGTATACATTTAGGAAACAACATAACAAAATATTCAGTGTCATCAATTactggatggcggcgttagtatc	GTTTCAAGTTCGGTATTTCATTCAAATCACCAATCTGTGATGTTGCTGTAGTTGTTGTAGTTGTAATCATcgactatttatatttgtatg	ACATCAGAGAGAGATTTCCCAG	TCTTCTAAATTAACATCCTCCGG
GELC0612	C2_08860W_A	CTTTTCCTTCTTTCCTTCCTTCCTTCCTTCTTTCATTCCAATATAATAGTCATTACCTTACCAAACTATTactggatggcggcgttagtatc	AAGTATTTGGAGTGTTGCTATTGCTATTATTGTTGTGGTTGTTATTGGTGAATAGAGCTAGTTGTACCATcgactatttatatttgtatg	AATTACACAACACCTCCTCCAA	GTTGCTATTGAAAAGAAACCTCGTG
GELC0617	C4_03930C_A	TTCATTCAATTACATCTCCTATAGATTACAAACATAAACAAAACTAAATCAATCTCACTTTTAAACCATCactggatggcggcgttagtatc	ATTTACCATTATTTGATTGTGTTAAAGTTTCAACTTGTTTTAGAAATTGTGAATTATCTAATCTTGTCATcgactatttatatttgtatg	ACGAATGGGATTAGTTTAACGT	GTAGTGGTGGTGGTGGTAGTTT
GELC0626	CR_06160C_A	ATAAACAATTACCAATTACATCTGCTCCCAACAAATATATCCATCATAACTATAACTATAACTCAATATCactggatggcggcgttagtatc	TAGGGTTATCTGCATAATTGGTGGTTATTATGCTGCTATCATCACTTTTATCTTTAGTTGTAAATGACATcgactatttatatttgtatg	ATGGGAAATTCAGTTACAGGTG	AGACTGCTCCTTTGAAGAATGT
GELC0629	CR_02700W_A	TTGTATCAATCAACTACAACAACAACAACAACATCAACTTCTAAAGCATTATACTACTCTTTCCTTCACGactggatggcggcgttagtatc	ATGTCAATCGGAAATATTGGAAAAAAGTATCTCTATCGACATAATCAAATATTTCATCAAATGCAGCCATcgactatttatatttgtatg	TTCCTTCTTGTCTTTGGCTCTA	ACCCCAACCAAATTCTTTAGCT
GELC0638	C1_01030W_A	ATTAAATACTTTTTTGTCTTTTATTTTTTGATCTAATTCTTAAACCAATATAGATTATATCCCAAACAAGactggatggcggcgttagtatc	GATCGTAGGATGAAAAATAGTGTTGTTCAAATTTTGACAATTGTGATTTATCAGTAGCTGATTCAGACATcgactatttatatttgtatg	TGGGAAAGGTCATGAGTTCG	CGATTTCCTTGGCCTTGTCAAT
GELC0639	C1_01270W_A	ATTTACTCATTTTCAAAGAACAAAACAATACTTAGTTTTTAGCCATACATACAAATAAATCACAGGGACAactggatggcggcgttagtatc	TAAAGTTGGGCTTTATTGGGTCCCATAAATTACCATTCTGTTGAGCCAGGGAATTTAAGGTAATCAGCATcgactatttatatttgtatg	AAAAGAATCAGGAGTCAGGAGG	TGGTTTGTATTCCCAACTCTCCT
GELC0640	C1_02130C_A	TCTTTGTAATTTTTTTTTTCTCCCACATATACACACATACAAACCGATTTTTATAAGAAAGAGTTATACCactggatggcggcgttagtatc	AGTATCTGGATTTAGTTAATTCTTGATCATTGGAATAAAATGATAAATCATCAAACGTAGGAACTGACATcgactatttatatttgtatg	AGACATCTGACACGATTCATGA	TGGCAAAATTCTTGGAATCAGTGT
GELC0641	C1_02300W_A	TCTTATAGACACCACATCTCCAAACCCTCCCCCTCCCCCCCCCACACACACACACTCGTCTCATTTAATCactggatggcggcgttagtatc	ATTCTGCTTGAGATTTATTTAATTGATTATCCATTTCAAGTAGGACTTTTTGTAATGCTTCTTGATTCATcgactatttatatttgtatg	ATTTCCAAGCAGTAGTCCTAGT	AATGCTTTACCACAACCTTGCC
GELC0642	C1_02440C_A	CACTCAAATCATCAATTATTACCACCACTACTTCCTTCAATTAACTAACTACTCTTAAAATTACCAAAGTactggatggcggcgttagtatc	TAAATAATTTCTTTGAATCATCCAAAGTTATGGTGGATACTCCATTGGTTGACTTTAGTTTTAATCTCATcgactatttatatttgtatg	CCATGCCATGCTTTATTGCTAT	GGTTGTGGGGATAATGGAGGTT
GELC0643	C1_03250C_A	ATAGATAAAAAAAAACAACAGCATAAGCTACAATTTGATTGCCTCACTTTTCGTCTCCGTCAAAAATACTactggatggcggcgttagtatc	TTTTGATATCTATCAGATTTTCGGACCATTCTCCTTTCACCTTATCGTATTGAGTAGTATCGGGGTCCATcgactatttatatttgtatg	GGACACAGGAAATGATTTAGAGC	GGGACGTCTGCATACACAAAAC
GELC0644	C1_04170C_A	TTTATTTTCTTTTTACTTTATTATTACAATTTTATTCTAATAAATTAATCATATATCATAACTTATAACAactggatggcggcgttagtatc	AACCAGCTTTAGCTGATCTAGAAGTTGAAGCTTTTTCTGAAGAACCGGCTTTTCCTTTACCACCTGACATcgactatttatatttgtatg	TGGCAGAGAGAAGAAGAAGAAG	ATGGCCAATTGTAAATGTCTTG
GELC0645	C1_04670W_A	CAAAGCAAATAAAAAGATAAACAGACAAAACTATTCTTAACAGAACGGCAATCACATCAAGACTTAATCAactggatggcggcgttagtatc	TTGATGATGTCGTCCATTGCTCTGGTTGCAATGCTGCCGTAACACTACTTTGTTCTTTTGCGGATGACATcgactatttatatttgtatg	TGTTGTTGTAAGGACTTAGAGGA	CTGGATCGTCAGTCAATTTGGC
GELC0647	C1_05810W_A	ATCAATCTTCGCAAGGAAAAAAATTATCTGAAAATCTATTCTTTCCACAATCCTAAAAGAACAGGGAACAactggatggcggcgttagtatc	TACGAAACTCAATCAATTGCTGAGGAGGTAATGAATTTAAATCTATATTGGTAGGTTCGGCTGCAGACATcgactatttatatttgtatg	GAGGTAGACTAGAAAGATGGCA	CAGACAAGGCTTGCAAGGATT
GELC0649	C1_06630W_A	ACAGTTTCAACTGAAATACTCAATAAACTACTCTCTAGTCAATAACAGTCAATCTATATTTCTTTGCAAGactggatggcggcgttagtatc	TACCAATGGAGTGGTTGAAATGAACAAAAGAGTTCCCATCTGGAAATGCAGATATCTTTTGAAGTGACATcgactatttatatttgtatg	AGACAATATACACAAAACGCGT	TTCTAATTTCCCTTCAGTGGTGGT
GELC0650	C1_07080W_A	TTCGATTAGATTCTAAACTCCATTAATTTCATACACTTATCAAAAACAGTATACACAGCAATCATTTGTCactggatggcggcgttagtatc	GTTGATGAGGTTGCGATTGTTGTTGATAGGAAGCCGAAACAGGAGTTTGGGTGCCACTGTGTGAGAACATcgactatttatatttgtatg	ACTGGTTTAAATTATTGGCGGG	CTGATGGCCCTTATTGGTGTCA
GELC0651	C1_07330W_A	GAAAGCTTATTTTCTTTTTGTTATTTCAGTTCAGTTCAGTCTACTGCCCCTTCCATTTCCTCTCCTTTCCactggatggcggcgttagtatc	TAAGGTGGTGACGGCTATGATGATGATTTAAATAACCTGCATTATTGGACTCTAAATTATAAGAAAACATcgactatttatatttgtatg	TCACACATACCCACACACTTAA	TGTTGAAGTTGGCTCATAGTGT
GELC0654	C1_08270C_A	TACATTAATACTTTCATAATAACCATTTATTGATACCAAAGGGGGTTCTTGTGTGTCCGGATTGCCTATTactggatggcggcgttagtatc	TCCATGAGGCGTTAGGATTTGAGCCTCCCCCCATTTGTTGGAGTGAATTCTGATTTGGAGGAATATTCATcgactatttatatttgtatg	TCCCAACCAAACAATTCAACTC	ACTTTCATTTTAATAGCCCGCA
GELC0655	C1_08300W_A	TTGATCATTTTATTACAAACCCAAATATTAGTTTACAACCAACATCGAAAAGAAGTGTCTGCCATTGACAactggatggcggcgttagtatc	ATGCTTGAAGCCCTTCAGAAATCTTTTTGTTTAGCTTGTCAAATTCTTGTTGTAGTTTTCTTGCACTCATcgactatttatatttgtatg	GTGGACGAGCTCAAAATTTCTA	AGTACGATTCTCCTGCAATACA
GELC0656	C1_08810C_A	TTCTTTTTTAGTAACCAGTAATAAGGATCTCATCTCAGTGTTCACTATTCACCCAAGTTCATAACGCATTactggatggcggcgttagtatc	TGGATCTAATTAAATTTGCCACTATGGGGCTTGATCGTATTCCCAACGATCTGCTCAACTGTTTTAACATcgactatttatatttgtatg	GGCATATGAAGTATTGGTCTCG	AGTCTTCAAATTTAACAGGTTGGA
GELC0657	C1_09390W_A	ATTGAAGAACTTGTGCGATGCGCTATTTTTTTTGTCTCTTATCTACATAGACTATGATATAAAACAATATactggatggcggcgttagtatc	TTATTGGTTTTTTGGTTGACATATTTGGAATTATTGATTTTGCTAGTAGTTGATATAACTTGTTCAACATcgactatttatatttgtatg	CACCGAAAACTAGTAAACCTGG	TGATAATCTTCATCCCATGGCAC
GELC0658	C1_09870W_A	TATTTAAGAGATAAACCAAAGACACTGAAACAACTAAGCGAAAAAAAAATTAATATACCTTTGGATCAAGactggatggcggcgttagtatc	AATTATTCTTGTAATTAGAGGAGTCCCTTAATGGTTGTCTTGATGTAGGTTTATCCATGACAGAAGACATcgactatttatatttgtatg	GCATATTACGCGTCTCACATTT	TGAGAGTCACCCACCAATGAAG
GELC0659	C1_10330C_A	AAAAAAAATAATCAACATACTATCAAAGTTGGTGGCTTCTTTACATCATTCTTCTAAAACTCCCTATTCCactggatggcggcgttagtatc	CAGTATTGAATCCAGCTTTAATAGTATATGATCCATTATCTATCACTAGTTTTTGAAGTTGTTCTGGCATcgactatttatatttgtatg	GAGAACAATAGCTTCCACAACC	TGGGCGTCTAAATTGAATTCCA
GELC0660	C1_11910W_A	AATAGAAAATTCTAATAATCTAACAATCTAACAATCTAATTCAAAGATCTTATCTCAACACCCTTCAACGactggatggcggcgttagtatc	CAATTTTTTGACGATTGTCTGATATACTGTATGTTTGATTGATTTCATTAATAAACTGAACCACACTCATcgactatttatatttgtatg	CTTGGGGCTTTGTTCTTCTTAG	TTCAAAAGAGACCAAGGATCCA
GELC0662	C1_13970C_A	GCCAAAAACTTTGCAACATTTCAAATTTCAAGCATAAATCAATCCAAAAATTGAATATCGAATTTAACTGactggatggcggcgttagtatc	GTTGTGATGAAGGCGTAGAACTTGAATCTAATAAAGATGATATGGAAATGTTATTCTTACCAGAAGCCATcgactatttatatttgtatg	TGGCCATAGTTAAGCAATATGA	GGGCACTTGAGTTGAACTTGAC
GELC0663	C2_00440W_A	TACTTTTACTGACCACCACTAGTTTGTTTTGCTTGTTAATTTCTACATCTAATATCATAAAAGTTCATGCactggatggcggcgttagtatc	CTTTGGTGTCTGTTTTCGTTTTCCGTTTGGGAGAGGCTTTTATAATGTTTGTTGTAGTAGTTACCAGCATcgactatttatatttgtatg	TTTCTTTACTGCTTGGTTGTGG	CCTTCAGAAGCTACTTTGTTGGC
GELC0665	C2_01470W_A	GCTTTCTTCTGGCTACTACAATCTTCACTTACAACTAGAATTCATACTAAAAACATTCGATAGAAACATCactggatggcggcgttagtatc	AACTTATGGACCCCAAATGAGCCAATTTGTAATATTGAGTGGATATCGATGAAGCGTTTGCCCCTACCATcgactatttatatttgtatg	TTCTTAGATGTTGTGGCTCCAT	TGATCAACGTTCACAGTATCGGT
GELC0666	C2_02100W_A	AGTCTTTTTTTTTTTTTTGCAATACATTCATTTTGATTAATCTTTTTGCTAAGTCTATTACTTTCTTATAactggatggcggcgttagtatc	ATTGTTGTTTCATTTGATGCCAGCGTTGAATCGCTCTTTGAATATCCTCTCTTGTAGGTTGACGATTCATcgactatttatatttgtatg	ACAAGCCAACAATTTAATTTTCCC	TGGCGATTGTTGTGAATGGTTT
GELC0667	C2_03520C_A	TTTCACAACAACCAGAAACTCAAACCACTACCACTACCACTACAACAACTTAATACTATTAATTTCCAAGactggatggcggcgttagtatc	ATGAACCAGCAGCAAATGGGTCATTGAATTGATAGGCTTTCCATTTAGAAGCTTCGCTAGAATAAACCATcgactatttatatttgtatg	AACCCACCAATCTTTCTCCTC	TCTTTCATTGACAGTAGCAACACA
GELC0668	C2_03980C_A	AAGACACTGACACGAATAAATATCAACACGACAACCATCAGCAAGTTACAAAATCAAATTAACAATACAAactggatggcggcgttagtatc	CTTGAAAATTAGTTGAATAATTATACAATAACTGCAATGACTTGTCTAATGCTGACTTGGTTCCTGGCATcgactatttatatttgtatg	GACGTTTCAAACTAGACACCAC	GTTGTTCAAGACTATCACCAGCA
GELC0669	C2_04130W_A	TTGATTTAAAGACACAGTTAGACTGAAAATCGAGATTGATAGTTTTCTACATTTAACATAGATACTAATTactggatggcggcgttagtatc	TAAGCGGGGTTGTAAACAGGGGATTCTCGACCAGCTCGATATTATTGACTTCTGTTTGTGCTTGACTCATcgactatttatatttgtatg	CCAAGACTCAACGATCAACATT	ACGGTTTTCATCAATTGGTTCTCT
GELC0670	C2_04490W_A	AAAAACTCCAACTCCTTACATTTGCTTTCTTTCCATTCATATATTCTTTTAACCACTTAATACAACAACAactggatggcggcgttagtatc	CTGCTTGTTCAGCTTTACGGGCATTTCCAGCTGCCTTCTTGGAATTTTCTCCTGCGTTCTTTTTAGCCATcgactatttatatttgtatg	ACCTAATGTTCATGTTGCTGAT	AGCTTTTGTTGGTTTGGAAGGC
GELC0673	C2_04870C_A	TTGATTGAACAACATCTACAGTTTCAACTATCAAGCACACTCTCCACCAATAAATTTATCACCCCCAACAactggatggcggcgttagtatc	CAAATAGCAGATCCATTCCACTACCAGAAAAGTTCTCAACCACCTCTTCAGTAATGTACAATAAAGACATcgactatttatatttgtatg	TACCTTGTGCCTTAATGTGAGA	AAATTCTTGCCTGATCGTCCGA
GELC0674	C2_06220C_A	TTTATTCCCAGAGAGAAGAATAACCCTAACAAACAACAAGTGGAGAGTTTATCATCCAATATTTCGGAAAactggatggcggcgttagtatc	GCACATGCGATATCAAACTTAAAGTCTCCTTCAACTTTTCGGAACTTTTTGTCATCAATTTCAACTTCATcgactatttatatttgtatg	ATTGAAATGTCGCTGTTTGGAA	TCAATCCTTCACTGTTTGCTTT
GELC0675	C2_07200W_A	TACCTTACGGCCTAGCTATCACACTTACGACTCTTTAGGGGAGGATAATAAAAATAAATCAGTAATCAATactggatggcggcgttagtatc	TTTGACCTTCTTTATCTTCTTTTGGATATAACATATTATTGCATTCTGCACAAAATCTAAAGGATGCCATcgactatttatatttgtatg	CAACTCCCAACAACTTAAGTCG	TTCATGATGTCCACAATCCGGA
GELC0677	C2_08600W_A	ATCTCACTTTTTTCATCTTATAACTAAAATAAATTAAATATTAAAATTATACACACACATTCTTCTTATCactggatggcggcgttagtatc	TGGAAGATTTACCAGAACCTGAACGTCCCATTAAAAGTAGTTTCTTTCTTGATGATGCAGATGTAGACATcgactatttatatttgtatg	TAGCGCTACCAATATAAGTCGT	CAGTTTACTTTCAACATCAAATACATGGA
GELC0678	C2_09040W_A	AGCTTAACAAGCTTGCTTTTTTCGACAATACATATACATATAGATATTTAAAGAGAACATAATATTAACAactggatggcggcgttagtatc	CAATTGATAAACCTTTTCCTTTTAAAATCTCCTTTAATTGAGCTACTGTTTGAGTTGAATAATCTGACATcgactatttatatttgtatg	ACTTTTCTCTACCACGAATTGC	AGTGTGCTTTCATTTTCTTGTGT
GELC0679	C2_10250C_A	CCTTTTAGTTCCTTTCTTCTTCTTCTTCTTCTTCTTCTTTATGAATAGATAAACACTCATTTAACAAATCactggatggcggcgttagtatc	ACATTGGTGTCGATCGTTTAGAAGGCAGGCTAGTGTTATTAGAACTCTCTTGAAAGTTGTTATTGGACATcgactatttatatttgtatg	TGCTGGTTCAAATCAACAACAA	CCGACGATGTTGTTGTTGATGA
GELC0681	C3_01210C_A	GAACTCAAAAAAAAAAATTGTTCATCATAATCAACTCTATCAACTAATAACAAACCTAATCAATTGAACTactggatggcggcgttagtatc	ATAGTAAGCTAGTTGATTCAAAATACATACCTTCACTTTCTGGTATATTATCTCTTGATGGAGCCTTCATcgactatttatatttgtatg	TCTATTGTACCCGAAAGTCTTTT	GCAATTGAGTGGCTCTATCTTCT
GELC0682	C3_02240C_A	CTATTTTATTTGTTTTCATTAGTATATCATCCCCCATTACACGTTTGATTCAAATTCCAACTTTTAAACCactggatggcggcgttagtatc	ATTGAGCTGATTGTTGCTGTTTTGATGTGCCGTTACCTTGATCGGCCGATTTCGAAGCACAAGAACCCATcgactatttatatttgtatg	TCTCCATAGTAGTACCACCTGA	ATTCAGGCTATCAGAAGGGTGC
GELC0683	C3_05790C_A	CTATGCTCTAACCGACAACATTAGATTACTTTGATAACTCACAACCTTTAATTAACACTATCTACAAAATactggatggcggcgttagtatc	GGTTTTTTGTTTGCAAGTTTGTGCTTGCCTTTCATACTAGTGTCTTGTACGTTATTGGTGTACTTGTCATcgactatttatatttgtatg	GACTCTAGCTGTTCATCTGTCA	TTACTGGCAATTGTACCGTTGG
GELC0684	C3_06060W_A	TTCGATCGATATTAAGATAAGAATACTTGTACTTACTCCCTATAACTTCTCCTAATAAACACACTACATAactggatggcggcgttagtatc	CTAAGGAGATATCACCACAACATTGTATAAATCTTTCCTTTTCCGGAACTTTATTCTTTTGAACTGGCATcgactatttatatttgtatg	GATTTTGGAAGGCTGGATTGTT	ACGCTGTTCTAACTGGTTTTGC
GELC0686	C3_06470W_A	AATCCGACACAAATAATAATACAAACATTTATATTTGATTTTTAAAAAGATACATTGGTGCTTACTATACactggatggcggcgttagtatc	GGGGTTGAAATTGAAAACTAGACAAATTCTGAGCATTCGCCGGATTGGAATTAGAATTGAATGAACTCATcgactatttatatttgtatg	TAATTGTCAGCTTTGGTTCCAAG	GACGGTTGTTGGGTTTGAAGAG
GELC0689	C3_07630C_A	CATCGATACCCTACTTCAGGACAATTAGTGACTACATTCAGCTTACGTCTGGTATACGCATTGGATCAAAactggatggcggcgttagtatc	CAACAGGAACTTGCTTCTGTTGAATTTTCCCCTTTTTTTCAATTTGTTGAAGAATAGATGACAAGCCCATcgactatttatatttgtatg	TTTGGAATTGGGTGCTTTATCG	AGGTTGACGACTTCCAGATCTG
GELC0690	C3_07660W_A	CTATTTTTTTTTTTTTGCACTACGATTTCTTTAGCAATCTCTCACAATATCATAGTTCCCCCCCTACTCAactggatggcggcgttagtatc	GCAGTTCTTCTCTTATATTAACATCATTCAATAGCTTTCGGTGATGTAAATTGGGGCTCTGGTTGCTCATcgactatttatatttgtatg	GAGGCTGGATGGTTATTGATTT	TCCTCTTTCTTATTGTTGTCTATTCGT
GELC0692	C4_01780C_A	TGTGTGTTTTTTTCTCTGAAGTGATTATCTTCTACAAACCAACTCAATCAATATTATATTATAAGACACCactggatggcggcgttagtatc	TATCTAATTTCTGAGCCAGTAGTGCTTCTTTAAAACGAGATATAACTTCAAGAGAAAAACTATCTAACATcgactatttatatttgtatg	CGTGTACTTTAGCCAGTTTTGA	TGGTCCTGTTTATTATCACCATAT
GELC0693	C4_02030W_A	ATTAATCTGTATTATAATATCCAAACTGTTCGTTGATTCATATGTATCTATTGATAACAAAGTACTTGAAactggatggcggcgttagtatc	TGAAATAATATCCAGGGTTCAGCACTGACGATTTCTGTCGTTTATGTGTTCTATGTGGGTTATTGGACATcgactatttatatttgtatg	AATCTGGTTCGTCACAAGTACT	GTTCCTGTTGTTGTCGAAGCTC
GELC0694	C4_02850W_A	TTAACTATCTTTACAGTGAAGTTAGTTTGTATTCAATATTCGAAACTAGTTGAAAGTCCAATTAACTACGactggatggcggcgttagtatc	AATCTGAAACAAAATTTTGCTTATTGACACCAATAAATATAGCCTCCTGAGTTATTTCCAGGCTTGTCATcgactatttatatttgtatg	ACGCTGTTACCATAATCTAATGA	ACAGTTTCCCGTTTTCTCTCCA
GELC0695	C4_03440C_A	TTCTAATTCCCTTATACTTATTAATTAACTCTGGTTTAATTTATTACATTACTCTAACTTTAGTAATAGGactggatggcggcgttagtatc	GATTAGTGGTGATTGTTGTGGAATTATTATTAATGTTTAGCTTTGGTTTAGAAGATGAAGATTGATACATcgactatttatatttgtatg	ACCACATCATCATCATCTCTGT	AGGTTTTGGTGGATCATTAGTAGT
GELC0696	C4_03800C_A	CATATAATCCTCACTATTTTCAGTATAGATCATTGCTACAACTCAACTACAAGACACTAATTTACTAGAAactggatggcggcgttagtatc	GTTCCAATGCCTGTGAGAATTGGACTTCAACACTGGTATTTTGATCGTAAGTTACTAAATCAATTGGCATcgactatttatatttgtatg	CCTTTTCTTCTCTAGTCACTGGT	TGTCCTAATTGTAATGCTTGTGT
GELC0701	C4_06450W_A	AACAATCAACAATCAAGAAAGTTAACGCCACCACCTAAAACTAACAATGTCAAATACTCCAGGTCGTTCTactggatggcggcgttagtatc	TAGTGATTTCCAGTAATTCATGAAGATTTACTTGAGTTGTGGTGGTGGTTGTTATTGGAGTACTTGACATcgactatttatatttgtatg	GTTGTTTAATTGGTGCCGTTTG	TGTTGGTTTTAAACTTGGTGGTGA
GELC0702	C4_06730C_A	TGTTTCTGACACTTATAGAACATTTTTAAGACTTCCTTTTTCTTTTTCTATTTATTAAACTTACACCAACactggatggcggcgttagtatc	TACCTCGAGTCATGGATTGTTGAATTATGGCTAATTTTTCTGCCTCTAATCTAGATTGACGACTGGCCATcgactatttatatttgtatg	CTATCTATACAAAGAGGGGCGG	TCACTGACTTCGTTTTCCCAGA
GELC0703	C4_07070W_A	GTATAAAAAAATGTATACAAACAAACAAAAAAAAACACGAATGAAACACCTTTGTTGATTGTTCTTAACCactggatggcggcgttagtatc	ACCTTTCAATATAGAGCACTTTATTGGGATCATCTAAATGGATATATGAAAAAGTTCCGTCTCTAGACATcgactatttatatttgtatg	GAACAGGTTCGTTTAAATTGGT	GTCATCTTCTTCTTCCTCGGCA
GELC0704	C5_00210C_A	CACTATTTAGGATTATTCTTGATTGTTTATTTCCATTTATACTTTGGTTGTTAGTAAGTTAATATCGGTTactggatggcggcgttagtatc	TCAGCTTTTTGGCATGCGGTGAGTTTAACGAGTCTGGAGTAGACCTTTTCTTTTCGTTATCAACAGCCATcgactatttatatttgtatg	TGTCGTGTGCTTCATTCAAATT	ACACTGTGACAATATGCTTCAGA
GELC0705	C5_01340W_A	CCATACACCCATTTGACAAGATTATCAGTACTGTCAAGAAAACTCACTATAAAACAACTACTTTTAGACGactggatggcggcgttagtatc	CATGTAGCTTTATCGAGGTGTCAGCTGGCATACTAGTGCCTGAATTGTCAAGTAAGTCAATCAGTATCATcgactatttatatttgtatg	AAAGGTGTGCAAAGTGGAAAA	TCAAACAAGTCTTGACCTCTGAC
GELC0707	C5_02160W_A	AAATTCCCCTTTGGAGGTGGTTTTTGTTATGGGAAATACTATTGTACATCTTTTTCATAATTAATTAATTactggatggcggcgttagtatc	TATGTTTTTGGCAGTCATAATCTAACTCCATATTATCTCGTGGCATATTTATCGTGATAATTGAATCCATcgactatttatatttgtatg	CGATACTCTCCCATTCGCAA	AGTCAATCCATCTCTTTCTAACCTGA
GELC0708	C5_02620C_A	TGCTACTCGTGAACCACCGGTATAGATCACCAAAAAACATTATTAGACAACCAGAGAGACAAAAAAAAAAactggatggcggcgttagtatc	ATTCTTCAATGTGTCTTTTCATATTTTGACCACGATTGACTCTAGTCACACGTTTTGTTGGCTCTTCCATcgactatttatatttgtatg	TCATCAAGAACAAGAAGAAAGACT	TAATTGTCTTTTGTGGCACCGC
GELC0709	C5_02750C_A	ATTATTACTATTACTATTACTTTTGAATATCATTTCCTTTTTTTGATCTGAACTCTTACTACTATTGGCAactggatggcggcgttagtatc	TGTCTTGATTAACATCAATGGAATGAATTCCTCCATTATGATACAGTTGAGGTAATTTCAAAAACTTCATcgactatttatatttgtatg	ATGGAGTGAGTGAGTGAATGAG	ACCTTTTGTTGTCTCCTTTGAA
GELC0710	C5_03550W_A	GTATCACTTATTTTAACACAGTGCAGTCATGGCAAAAAGAGTTGCAGATGAGCAAATAACGAAAGATGGAactggatggcggcgttagtatc	TTCTTCGGGATAAGACATCAGATGAGGCTATGGCTGGGGCATCTGGCTCACCATCAGAATAATTTGGCATcgactatttatatttgtatg	TGTCACGTGCATTTTATTAGGG	GGATTGAGCTGGTTGAGAAGGA
GELC0711	C5_03560W_A	GATTCTGTTACTTCAAGATAACTTCTATTACACAACATCAACACAGATTACAAACATTACTAATTATAAAactggatggcggcgttagtatc	GTCTTGTGTGGGTATTGGTATTAGACTCTGATTCTGATGCTGATTCTTTGTGACTATTTCGGATGGCCATcgactatttatatttgtatg	CTGTGAGCTTTCTTTTGCATCT	ATTTCAACAATGCAGTATCGCT
GELC0712	C5_04160W_A	TGCATAGTTTTCTTTTCAGTTAAACTGGCAACAGCATTTCCGACAACAAAACCAGCTATCAATCAATATAactggatggcggcgttagtatc	CTATTGATTCATTGGCATGTGTCTCTAAATTTTCTTTAGCTGTATCTTGATTTGAAATGGGGGTCTCCATcgactatttatatttgtatg	AGTGTAGAATTATAGTATTACTGGGGT	CATTGGGTTTGAGCTTTGTGGT
GELC0713	C5_04410C_A	AGCTATTTTGTTTTTCTTCTCAAACTCAAAACACATTTTTCAAAGAACTACCAATCCAATATTTGAGACAactggatggcggcgttagtatc	AATTTTCAGCCTGTCTAATATTCTCTCGAATAGAAGCTCTCAATTCTCTTCTTCTTGATGATAAGGTCATcgactatttatatttgtatg	AGTCGCACCAAATTTCATATTGT	ATTGGTAGTTGCCTCGTGTTCT
GELC0714	C5_04580C_A	TCATGAACTCAAGAAAGTCTCTTGCCCCAAAACAACGAAAACCGTTCATCAAACACAATTATACACAGTCactggatggcggcgttagtatc	GCTGCTGTGTGTAAAATGGTGGAAATGAGTAGATCTTCGGAAACTCAAACTGCAATATTGGATCTGACATcgactatttatatttgtatg	AGCATGTTTAATGTGAAATTAGGGT	TGGAAATCTGAATTGACTTGACGA
GELC0715	C5_04630W_A	AAAAATTGGAACTCTTTTCAACAATCAATACAACAATTTATTCAAGATCCAATATTAATTCATCATTACAactggatggcggcgttagtatc	AATCAATAAAAGATTTCATAGGTTGGATTATTCCACATAGCATACAAGCTCTTTCAGATCTACTTGACATcgactatttatatttgtatg	TGAATAACTAACGGCCCTAGTC	TTTCCCATTCACTTTGACAGCA
GELC0716	C6_00190W_A	CGCGACCTGGTAAAAATAATTTCGACGCCAAAAAATTTTTTTTTGGCTTTCCCAACCTTCATCATTCACAactggatggcggcgttagtatc	CTTTTTCAACAACAGCTTTGATGTCATTCTGTAGTTCAGGGGGTAATTGTTGAACCCATGCTGAATCCATcgactatttatatttgtatg	AACGCATTGGTGAATTTAGGTC	TTGCCGTCCTCTTCAACCAAAT
GELC0717	C6_01590W_A	TTTTTCCCCAATATCATATATACGTGTCAATTAGTGATCTGTTTTATTCTTACTTTTTTTTTTTGACTCGactggatggcggcgttagtatc	GCATTTTTGCAAATACTCGTTGTCGAGGTTGGAATGCTAATTTAGCCGAAACTGACTTTTTTGGTGCCATcgactatttatatttgtatg	CCCTCCATTTCCATTTTCAACT	TGGGACATCTTTTAATGCTTTAGA
GELC0718	C6_01830W_A	AAATAATGGAGAACACATTTTTTTTTCTCTTTGGAGGTTTTAGAAGGCAAAACCAAATCTAGACAAGGAGactggatggcggcgttagtatc	CAATTCCCTTGATTGCATCATTCAAAGATGGTTTGGGCGCAGTGCTTTTCGTTCCGAATAATCTGTTCATcgactatttatatttgtatg	TGATTCGAAAGCCCAAAATGTT	GTTGTCATGGAAGCTTGTGTCA
GELC0719	C6_02170C_A	TTATGTGGAAAAAAAAAAAAGTAAACACCATCAAATATAGACAACCAACCAACTTTACTATTCCACTTCAactggatggcggcgttagtatc	CATTGATAGTATATCGAATTTTGTATAAATCAGATTCTTGGATATCTGATGATAATATTGGAATTCCCATcgactatttatatttgtatg	TGAGCTTATGGAACTCTTTTAAAGT	TCGAATGGTTAAATCATCAGAACA
GELC0720	C6_02690C_A	GAAAGAGGAAAGTGTCATTTCTCAAGACAAGAAAAAGAAGAGAAAATTTTTGGAACCTTGACCACTTGAAactggatggcggcgttagtatc	TTTGATATTGATTATGATCCATCATCATATCCTCATTAGGATCAGGCTGTTGCGACGGGTAAAAAGACATcgactatttatatttgtatg	ATAACCCATCACCACTCATTCA	AGCTGTTGTTCATATTGTGGATAGC
GELC0721	C6_02790C_A	AGTTTCAATATATTTTCATCACACTATTTACCTTATCGAACCGGATTGTATCGTTTAGCACTGACATCCCactggatggcggcgttagtatc	TCAGACGACGATGTTGTTTCCTGATCCGTTGAATCCCTCGTGATTGAAGAAATTGTTGAAATGCTTCCATcgactatttatatttgtatg	TGAAAATTGCTTAAGGAACCCG	CCACCACCAAAACTTTCACTCC
GELC0722	C6_03290W_A	AACAAAATCTCAGTTTCAATCCCACATTTATCAACTTACTCTATTCATATATTCAGCAACAGCAATATAAactggatggcggcgttagtatc	TTCCACTCCCTCGATTGCTTGCAGTACTAGTATCCGAATTATATCCTCTTCTTCCTGATTTACGTGACATcgactatttatatttgtatg	AACCGGTAAACACATTGATCAA	CGTTAGTTAATTCGTCTTGTCCACA
GELC0725	C7_00510W_A	AATAATGCTACTTGCAAGTCTATGTTTACATGTCACTAGATCCCCTCCAAAAAGCAAGACTGAATAAGGAactggatggcggcgttagtatc	TGCAAGATGACGATCTGTGGCCTCTAACACATTCCATGCAAGCATATTTGATATCATCTATTAGTATCATcgactatttatatttgtatg	CAACAGCCCAGTCAATTAAACA	ACCCCACTACTGCAATCTATGAC
GELC0726	C7_00600C_A	CGCGAACTCTTGCAAATTTCCAGTAACTAACCATCTTTACTATCCACCCTCTTATTGTTGAATACCAGCTactggatggcggcgttagtatc	CCAGTGTAATAACTTTTAGTTGATCCTCTTCACTTAATCCTTCAGGGGCATACCTAGAGGGAAGAGACATcgactatttatatttgtatg	AACTCCAGTCGAATAACTTGGA	GGCGACTCTTCAATGACCATTT
GELC0727	C7_00810W_A	TGTTGATAGAAAAAAAAAAAAACACAACCAAACTAAAAAAAAGATAGCCATACATTCATACCTATTCATCactggatggcggcgttagtatc	CTTGTTGATGTGGTGAAACTTGAGTTATAATGTCCTGTGGTTGTTGCTGAGATGAAGTAGATGTAGACATcgactatttatatttgtatg	TCCAATTCCAATTCCAATTCCA	ACATCAAGAAATACTCCATTGGG
GELC0728	C7_02040C_A	GATTTATATTTTACTATAAGTCCTATCTGCAATTATTCTACCCCATACTACACATATATATACATTGACTactggatggcggcgttagtatc	TGGACAGTAATCGTGTCACAGTTGGTACTGGTTGTGGTGCTGCTTGGTTAATTAATTGATCTAACTTCATcgactatttatatttgtatg	ACACACAAACATACAGAATTCCA	GATGGTTGTTGTGGTTGTTGCT
GELC0729	C7_02110W_A	TTTTTTAATCCTATCTATACCCGTGGAAAAGAAAACTATTTGACGGGTTTTCCATTGCTGAACATTCTATactggatggcggcgttagtatc	CACCGTTTGACATATTTCTTGTACTCAATGATAGCTTGATACTACCCCGATTACCAACTCTAGAGCCCATcgactatttatatttgtatg	TGAGCAAAATTAGACACTTGGG	TTGCCAGAAACAGATCCAGGTT
GELC0730	C7_03320C_A	TACGTTTTTGATTCTCTCTTGTTTTTTTTCATGCAACCCACCAAGTCAACCAAAGCAACCAAGTCATACCactggatggcggcgttagtatc	TCAAATTAGACGCTTTTGGAACTTGTTCAAGATGTCTACCAATAGTTTGCTTGTCAGTTTGAGTGGCCATcgactatttatatttgtatg	AGTTGTCAGTTGGGTCAGTAAA	ATTTATGGGTTCCGGTGATGCC
GELC0731	C7_04100C_A	TTATAGTTGACTTTGTGTTGTTGTAGTCAATTGCTTGTTTGAAGGTGTAAGAGAAAGAGAGAAAAAAAAAactggatggcggcgttagtatc	GAGGACTACTCATTATTAGTTGCACAATCAATATGAACTTGGGTCTCGAGATTTTTCTGTTCGAATACATcgactatttatatttgtatg	AGAGCATATTGAGATGACGGTT	CACATCGTCCACCTCCATGTTA
GELC0733	CR_00140W_A	GTGAAGTAATATAAATTCCAGACCAAACCCATAAGAAAAAAAAAAAGGAATCATTCGAGCCACACCCACAactggatggcggcgttagtatc	TTGAAGGGCGTAAAAGATCTGGCAAGAACAAAGAAGCCAAGTCCTCGATTCTCTCTTTATTTGAATCCATcgactatttatatttgtatg	CCCTCACCCTGAATATTCTCAA	TGTTGTGGTTGTTGCTGTGATC
GELC0734	CR_00630W_A	AATAAATGATTTCTTTAATACCATTTCCTCATAAACACAATATATTTATATAAACTACAAACATTAAGCAactggatggcggcgttagtatc	ACCTTTCATCATGGAAATTTAGTTTTTCTCGTATAGCATGGGTAACTCCTAATTTCTTATTGTGTTCCATcgactatttatatttgtatg	TGCATGACAACACGACCT	ACACTTTGTATTGCTGCTCGAAC
GELC0735	CR_01580C_A	AAAAAGAAAAGAAATTATAAAAGTATTTAACCACTACCACCACCACCAAGGAGTATTCATAAACTTTTAAactggatggcggcgttagtatc	GGTTTTTTTGACTGGAAGATCCGGATTTTGATTCAGAAGAACCACTTGCCTCTATCTCTGGTGAACTCATcgactatttatatttgtatg	ACTGTTCAACTTTTGTCACGAT	GCTGCTGATTTTGGAGGGTTCT
GELC0736	CR_02050C_A	CGAAATTCATTATTAAGGAATTATATAGAAGCTACCATTTTCACATCTATTATCATTTTCCTTTTTAAGAactggatggcggcgttagtatc	TTTGATTTTCTTCCTCTGAGATTTGATTTTCTAGCTTAGAATCTAGATGTTCTTCTTGACCAGTCGACATcgactatttatatttgtatg	AGCTTCAAACAATAACACACGA	GGCTCAGTTTCGGTTTCCTCTA
GELC0737	CR_02930W_A	GTTTACTTCAGGAATTGTTTATTTGATTTTAATTTTCATTACAATTGATATATAACAATTTTACATTAGGactggatggcggcgttagtatc	TTGCATGTCGTTTGTTGGGATATATTGGGTTAATATTGAATGGTGAAGGAAATTGTTCTGAATCACCCATcgactatttatatttgtatg	CGAATTACAACACACATCAACC	TCCAATCAATTACATCCTCGGCA
GELC0739	CR_04130C_A	AACACCAAAACATTGAAGGATAGATTTTTCAAGACTAGGATTTTACTGCCACTGTACTTGGAGGCAAACAactggatggcggcgttagtatc	TTATCTCATTCTCGATGGACCAATGTCTATGAGTTTGTTTAGAAGGGTTATTCTCATCCAAAGTTGCCATcgactatttatatttgtatg	GTATTACTTTCACTGGGGAGGA	TGTGGTTTCTTCTGTACTGGTGT
GELC0740	CR_05390W_A	TTCACTAGAATCTTGGCTGTTGTCAATTTTTTTTTCAATTCAATCATACACATATACATATAAACACACAactggatggcggcgttagtatc	TTTCTTCTTCAGCTAATTGAGCAATGTGGTGGTATAATGAGTAAATAATAATTGCAACTTTTGGAGCCATcgactatttatatttgtatg	TCGATGGACTACAACTACAAAA	GCATCCCAGAAAGCCTTGAATT
GELC0741	CR_05610C_A	TCCTCCTTTTTTTTTTATTTGTATATTTTTACAACCAATAAGTTATTATTGAATTCATTGTACACACTAAactggatggcggcgttagtatc	TGGGTGGTGCCGCTGGTGATGAGCTACGTGACAAATTATTTCTAATCATAATTGGGTTCATGGATATCATcgactatttatatttgtatg	CAAACGCAATCTCAGAACTTCA	ATCATCCTCATCGTCGTCACTG
GELC0742	CR_05670C_A	CCAATACACCCTCAGTCCTTTGACACGACACACATATAATTCTCAAAAAAAAAAAACAAACAACACGCCAactggatggcggcgttagtatc	CTTGAGCAGCTTTGGATAATTCGAAAAGAGTAGAGACAAGAGTGTCTTTGGTTGTTTTCAAGTCTGACATcgactatttatatttgtatg	GTTCTCCTCTCTTCCTTCTTCC	GCATTTGGGTCCTTTTCTTGCT
GELC0743	CR_05910W_A	AAAATCCATCAATGTTCAATTAAAGTTATTGTAATTTACCACTTTTTAAATCCATCACTAAATCAACAAAactggatggcggcgttagtatc	TGAATGTGGTATCAAGTGTTTGTTTGATTTTCTTTGCTGGTTTACGTGAGGATGACTTTCTTTTACCCATcgactatttatatttgtatg	CCACCATCACTTTCTAGCTCA	GTCAGAGTAGACGTCACCTTCT
GELC0747	CR_09490W_A	TTAATATTTGTAACTTTTCCAACTTAAAATAATTATTGCATATTGCACTAAAACTAAAACTACTATAAATactggatggcggcgttagtatc	TAATATTAGCAATATCAGGTTCAATAATTGGTGGTTCTGGAGTTGTATCCAAAATTTTCCTTAAATCCATcgactatttatatttgtatg	CTAACTTCTATTAATCGGGGCG	TCTCGTCGATCATTTAATTCACA
GELC0748	CR_09960C_A	ATATAACTCAACTGACTAGTATCACTTAGCCATCGGATCCTTATATTTGTTTGTCCTTTATTATCAGCTCactggatggcggcgttagtatc	TGGTGGTGGTGTCGGAATCAATTTTATTTCCTTCCTTTCTTTGTGATCTTGAATTAAATGTTACTATCATcgactatttatatttgtatg	GGTGGGAAATTGTTAAAGTCGT	CAGACAATCATTGCAAACGGGT
GELC0750	CR_10450C_A	AAATATTCAAAGTGTTATTTTTTTTAGGGCTAATACGACAACACCACTTGTCACCACTAACATACAGAAAactggatggcggcgttagtatc	TTGCTTCTCCCAGCACAAACATCATCTGCAGAATCTCAATCCTGTATTTGTACTTGTTATCAGAGGCCATcgactatttatatttgtatg	GCACTCGGAGTCATCATTAAAA	ACCACCTTCTTGATCTTTGGCA
GELC0751	C1_05700W_A	CTTTAATTGACCATCGACCACAAAAATAATATGGAAATAATACTAACAGAACTTAGAAACATCACTCATAactggatggcggcgttagtatc	GAAGATTCAGAGGACTAAAAATCATGTAATACATACCAAAAGGATGCTCGTCTTTGAATTGTGATCTCATcgactatttatatttgtatg	ATTCATCTATATATACATCCCCATCGA	AGTCAAATCCACTGGCACTAAA
GELC0752	C3_02530W_A	TCAACCTTTTTAATCTTTCTTCATTAGATTCTATTATTGAAATAAGTAAAAACATATACATAAATAGAAAactggatggcggcgttagtatc	CCCATTGATTAGTATTCTTTTTTTCAAATCTAGCATTAGCTGCTCTTTGTTTAGGTGTTTGTAAAGCCATcgactatttatatttgtatg	GTGGTCATAAGAAGAAATCGCA	TGCTTTCCCCAAATTTCTTCTTCT
GELC0754	CR_10270C_A	CAATTGCACCGAATCGAGATTTTTCTTGAAGTAATCAACCTCTCAAAATCAAAACTAAAACAACATAGCAactggatggcggcgttagtatc	AATAGTCGACAGACCAAGGAAGACAGTTTTTATCGACCCAATGCCAGTTATTTGGATTGTTTACCACCATcgactatttatatttgtatg	ATTTGGCATGCTGTTTATTCGT	TTCCGGAATTGTGATTGACCCA
GELC0755	C2_02000W_A	CCTTTCATTATTTTTTTCCTTGAATAACCTACTTTGGGTTAACATACACATATAGTTAGAAACATCCACCactggatggcggcgttagtatc	AATCTGAGTTTCTTGGTTTAGGTGTTGATTGTTTGGCACCACGACGTCTTTGTAATCCTGTTGTTGACATcgactatttatatttgtatg	GTTCAAGTTACGCCCAATCAAT	TTCCAACAATATGCATCCACGC
GELC0756	C1_10740C_A	GTATTTTCAGAACTCAATTGAATATCAAGTACAAATAACTTATATCTATAATTTACAACAATAACAAACAactggatggcggcgttagtatc	TCCCGGCTTGGCTGTTGATGTTGTCAACATCATCCTTCTTGATTCCTTTTAATTTGTCAGTTAAACCCATcgactatttatatttgtatg	AACGGGGAAAGTATGAAATTGG	CAGCACCAGAACCAGTACCAG
GELC0757	CR_03070W_A	AACAAAAAAAAAAGTGAAACAATTTATCACTCTAATTATTCAGAAAAGATTCTTATAGCATCACCACATAactggatggcggcgttagtatc	CGGAATCTTCGGGTACCAAGGTTATTGCAACATTCTTGTCTTTTAATTTGGCTTTGTTTTTAACTTGCATcgactatttatatttgtatg	TTTTGCAGAATTGTAATTGGGC	TCAGAAGCAATGTAGTCTATGTCT
GELC0758	CR_08250C_A	TCATTTCTCTTTTTTTCTTTTTTTTTTCAACTTCAATTCATTATTAATAACAATTATACACTATTAGATCactggatggcggcgttagtatc	TGGCCTGTTGTTTTGCCAATTCAGTAGCATTATTGATAATCTTGATAGCGTTATCTGTAAAATCTTCCATcgactatttatatttgtatg	ATGGAACCTTCTAGTGACTTCC	TAACACCTGGCCTGCTTGATAG
GELC0760	C3_00340W_A	TTTTTTTTCAGTCGAATTGAAAAGTGCTTTACGATAGTTCGATTAATATACCCATAACACCATTCATCTGactggatggcggcgttagtatc	GAAGATCTTGACGAAAAGCAACTTTTGTAGCTCTCAATGCGTTTCTATATGCTGATAAAACAGATGACATcgactatttatatttgtatg	GCTAAGGAAAAGGGGTCTACTT	TCGTCCTTGTTTGATGGTTTCA
GELC0761	C3_06950W_A	TATTGTCATATTCTTATAGATTCCCCAACTCCGCTATACACATATTTATACCAGTTACAGTTATTTATTGactggatggcggcgttagtatc	TATTATAATCTAAATTATAACTTTTCCATTGTGGGATTGATAAATGAGGTAAATTATCACCAAATTTCATcgactatttatatttgtatg	CACCCCAACGTATCATTCATTC	TGCTATCATTTCCATTTTCATTACCACT
GELC0762	CR_10020C_A	CTGAAAATGGACCATAGACCCAAACTACTTCTCTCTTTCTAGCACCACAAACCCCACAATTAGCACAACAactggatggcggcgttagtatc	GGTGTGATGTTAAGTCAGCAAATATGCTTTTGAAAATGAACCATAGATATACAAGTGAAGTCCAATTCATcgactatttatatttgtatg	CCTTCCCGAGTTAGAATGTCTT	TGGGTTTTGTTGGTGCCATTTT
GELC0764	C2_04010C_A	ACATCTTTTTTGACTACATTCTAATAAAACAACAACTAATATATTATTCAATTAAATATCGCTGCTAAAAactggatggcggcgttagtatc	CAGTGGCATATTTTCTAGGTCTACCGAAGAAATCATCAAAATCAGGATCAAAAAAACCGAACCAAGACATcgactatttatatttgtatg	TGAGCTGGAATGATCTGGAATT	AGGAAACCACGTATTTGTCGGA
GELC0765	CR_00830W_A	TATCAGAATAGAAAAACATCTGAAAAATTCTATTTATTTTACGGAAGCTACAACCATAACCCCATTAGACactggatggcggcgttagtatc	CTGCCTTTTTATATTCCTTCAGTGCAAATGCTTTATTACCTTGGTCTTTTAGTTCTTCTGCTGATGCCATcgactatttatatttgtatg	AACTTCTGTACACCAACCACA	TGCAGTACTCCCCTTATTGTGG
GELC0766	CR_10810C_A	AAAAAGACAACTTTTTTTTTTTGGAAATTTTTTTTTTTTTTTTTTCTTTCTTTCTTCACCACTAACCACCactggatggcggcgttagtatc	CCGACGCTAACGTGAAAAAACGAGTCACGGGAGGTATTCTCTGGATGTTTTCAACAATTGTATTAGCCATcgactatttatatttgtatg	ACTTGGTTTCCTCTGATGTTGA	GGAGTTGATCACCTGAAGAGCT
GELC0767	C5_05160C_A	TTACACGACTCCAAATCGTATACTTTACTACAACTACCAGTACATTCGACTTCAACAACTACTGACAAAAactggatggcggcgttagtatc	TATCAATCTCTTCAATACTAAAATTGGTATCTTCGATGAAACCATCAAGAATACTTGCATTAGCCCCCATcgactatttatatttgtatg	TGACATAAACCCGAAAGCTTTG	CCCAGAAAATGCAGATAATCCAGT
GELC0768	CR_05780W_A	TTATTTAAACAATCAATTCCAGCATTTTTTTCTTTTCTTTTTTCCATTTCATTTCATTTAGCAAGCAATAactggatggcggcgttagtatc	GTTTGATTTTAAACCCTTCTGTGACTGCTTTTTTGTTTAATTCAAACAATTCTTTATCAGAGAGTGACATcgactatttatatttgtatg	CCCCATAATTAGTACTGCTGGT	ACGATTGCCTTGGTTCCTCTAA
GELC0771	C1_10160W_A	TCTTTTTGGTTTTTTTTTTTTAATTTTCAAATTCATCAAATTTTAATAGATCATTAATAACTATTCAACAactggatggcggcgttagtatc	CAGCTAAGGCAAATGAGGCGTAATCTTTGACAGTATATTCAGGGAGTTTATATTCACTTGGAGTTGACATcgactatttatatttgtatg	TTCTGATCAACGTTGTCAAGTC	CCACCGAATTTGAAAGCACCTT
GELC0772	C1_00730C_A	CCGTTTCCTACTCCGTTTGCTCAACAACTTTTAAATATTTAAATCAATTTTCTGGCTCCCCATTATCATCactggatggcggcgttagtatc	GTCTATGTTGAATTGCATTTAATGCATTATTGATTTGTTCAGTATTACGTTGAACAGTATTTCCTGACATcgactatttatatttgtatg	GACACACATCAACAGAGTACAC	AGGTTTAAATGTTGCTGGTGGA
GELC0774	C7_04010W_A	CGTAAAAAAATAGAACGGAGAAGAAAACTGGATCGTACCCGCAACTTCTATTCATCTTACAACCTCAACAactggatggcggcgttagtatc	CCAAGTCAATTCCAAGTACATGGTGCTTGAACCTTCTAAACGTTATACGGGCAATGTTTTGTCTTAGCATcgactatttatatttgtatg	ATTTACAGTAGTGGACCGTGTT	CGGGGTTTACTACAGCTTGTCT
GELC0775	C7_03860W_A	AAACCTGCTTACACTTCTATTGTTAGACTTTTTTTTAAAAAAATTCTTATCATCCCACTTTATCTACATTactggatggcggcgttagtatc	GAATGAGTAAACCTTGAACACCAATAAGGGATGTTAAAATAGAAATAGCAACAGCTTTAGATAATCTCATcgactatttatatttgtatg	TATATTCTTTTCCCACCGACCC	AGCAATTTCATTAGCACCAACA
GELC0776	C5_00570W_A	AAATCAAATACTTATAGAATTTTTCACCTAATTCTACTTTATCCAATTTCGAATTGCTATCCACACTCTTactggatggcggcgttagtatc	TAGGGTCGTCATTGTTATTAACTCCATCACTACTATTATTTAGCGTGAAATTGTGCTTATTTTTAGTCATcgactatttatatttgtatg	CCCACTTCATTTCATTTCCCAT	GTTTTCATCAAGGAACGGCGAT
GELC0777	C5_00280C_A	TTTTTCTTCTGTTTATACTTGTTTTTTTTTTAACCGAAAATTTTTCAGTAACCATATTAATATTTAATAAactggatggcggcgttagtatc	TGCCCCAGAAATACAAGGCCGTACCTCCAATAGTGCCCAAACTAAGGGTGTTAACAAGTAGTTTCGACATcgactatttatatttgtatg	TGGCTATGTCTGTCTTTTAGGG	TGAGGCTTTGGTTATATGTTCA
GELC0780	C1_02840W_A	TTTATTAATAGTATCTACTGATTTGTTTGGTTTACCATTCCTTTAAATATACACCAACAAAATAGATATTactggatggcggcgttagtatc	TGTCAAATTTATAATACTTATCAGTGACTTGAGGAATCTCGAGGTCAACCAATGATAATACTTCTGCCATcgactatttatatttgtatg	TCAAGAGTGTAAACCAAAAGAGT	ACAACGATTTATCACTGAATGGCA
GELC0781	CR_08170C_A	CAAAGAAAAAAAAAAAATATACAAATGAAAAATAAATACCAAAGCAACTGGCAGGAGATAATTATGTACAactggatggcggcgttagtatc	ACTTGCAGCTCAATGCATCTAAATCAGTAGCACGGACTAACTTGTCCTGGCGATCTTGTGGTGATAACATcgactatttatatttgtatg	AGAAGGGAGAATTAGTCGACAA	TGTCCTTAAGTATGAGCCTCGG
GELC0782	C1_00430W_A	CTGGAGTAATCCATTACGCGACATCACATAAATCAACCCTCCCATACCCCCCCCACAGAATTAGCCTATAactggatggcggcgttagtatc	TGTTGGCATATTGTTTGGAAAGTTGTTGCTGTAAACTAGCAGTAGCTGAACTTGACAGTGTTTGTAGCATcgactatttatatttgtatg	CGACCAATTTAGTTAGTAGCGC	TGAATTGAAAACTCCTGCCAAAGT
GELC0783	C3_03660W_A	CCAAAAATAGAATTAGATTAATAATTTCTTTCTTTCTTGCTTCCTGTTATATATATTTATACCAAGTTTGactggatggcggcgttagtatc	CTTTCTTCTTCTTTCCAATGCCATTAAATGCAGCCAATGCAGCTGCATTTGCAGCACTGTTTCCAGACATcgactatttatatttgtatg	CACGATTAGAAACTCTGGTGTC	ATTTGCAAAGCTGGCTGAAGAG
GELC0784	C1_03330C_A	GTAGATAATCTATTTACTCACTCTTCTTGGAAAGTCATTTATTATTAGGAACCAGTAACTTAACACAAGAactggatggcggcgttagtatc	ACCCATCAGAAGTCGAAACAGAAATAGAAGAGTAGTCTGGATTAAAAGACAAATCGTTGATAGTGACCATcgactatttatatttgtatg	CAACTGGCAAGAGAAAGGTAAC	CGAGATTATCTTGGGTTTGTGGA
GELC0785	CR_03220C_A	ACATTTTAATAGAAACACAGAATCAGTTGCTCCTTATCAGTAATTATACACCACAATAAACTTAAAGAATactggatggcggcgttagtatc	CCTCTTCATTGGATGTCTGTTCCAGTGTTGATTGGACAATTGGTTGTTTGTTCGGGTTTGGTTGATTCATcgactatttatatttgtatg	TAATCAACAACGATCTGGATGC	TCCACAACGATATGATAGCCAA
GELC0786	C2_03530W_A	TGTATTTGTATTGCTTCTTAAACCTTGTTTATTGACTATTTAACTCATAATAATCACAAACATATGAGCTactggatggcggcgttagtatc	CAAATATGAAGTACCCATATTTGATATTGATGTTATGATGATCACCATGTCTTGGAACAACCTCGTCCATcgactatttatatttgtatg	GTTTCAGAAACGGGAATGGTAA	ACGCCATTCTGCCATATCTTTT
GELC0787	C3_05850W_A	TTAAATCACATTCCATTGATCTTAATCCAATTCATCTATTACAATTCTCATTCTACATTATCCCCCTAAAactggatggcggcgttagtatc	TCAATTCATGAGGGATTTTGAATTGATTTTGATGGGTTTGTATATGGAAATTTAACGTTGGTTCTGTCATcgactatttatatttgtatg	TAAGGCGAGAAAAGTTAAGTCG	TCTGGCAATTAATCTTGATCGGA
GELC0789	C3_07230W_A	TTTCCAACCTACATAATTTTTTGTTGTTGTTTTTTTATTAAAGGCTGTGTTGTCTAATAAAACATTGACAactggatggcggcgttagtatc	TATTAGGATTAGCATTGGGATTGGGATTAGCATTAGATTTGCTATTATCTGTCCGATTATAATTGGACATcgactatttatatttgtatg	ATGTCAACGTACCATTTTAGGG	ATCAGCAAATGGATCATGGGGT
GELC0791	C3_05710W_A	CAAAATTTCCTTTCTTTCTTTCTTTCTTTATTTTTTACTCAATTGAATCAATATTAAAACAATAAAAGCCactggatggcggcgttagtatc	CTTGATTCGAGGATCTTTTTGGATCATAATTGGATTGATCACCAGATGAATAAAAATCGTTAGCTGACATcgactatttatatttgtatg	ACTTGCATAGAAATTTCAGGTTT	CCACCATATTGTTGCTCGTGTT
GELC0793	C3_02930W_A	CGAAACTCTAACCAAGTAAGAAGGAAAAAAATAGTTGCTCCACTGTTTTTGACCTTTTGTAGCCAAACCAactggatggcggcgttagtatc	ACTTCAAGTTTGCTAGCATAATCGAAATGAACTCTTCTATATTGTCATTGAACTGTTGATTTGTAATCATcgactatttatatttgtatg	GTATAGCTCACGTTTTCTTCCC	CAAATCCCAACTGCCAACGTTC
GELC0794	C1_02610W_A	AAGTGTACAGAGTTTGTGATTGCCAGAATTTGCAAAATATTTTAAAATAACAACGATGCAGCATCCAAGGactggatggcggcgttagtatc	GATTAGCAACCTTTATACTTGAATCTGAGCCATTAGGTTTTTTTGCATTTGTAGATGTCTGATTGAACATcgactatttatatttgtatg	TTCATTTCATCCAGAGCTAGCT	AGTCTTCCTCTTTCATGTCCAAGT
GELC0796	C2_05720C_A	TTGCATTTTATTGATTATCTATATTTTAAAATAACACATCGTCTTCAAGCCAACAGTATATTTTTTTGTCactggatggcggcgttagtatc	TTGACTTTAAAAATGAGGTCCAGGATGACGATTTAGCTGTTTCTTCAGAACTGGATTTGGAGTTTGACATcgactatttatatttgtatg	GCGAAAACGAACAGCAAATTAA	ATGCTCGGCCCAATATTGAGAA
GELC0797	C5_05480W_A	TCGCGTGTATACGACCGAAAAAATTTTTTTTCTTTTTAACGCACCACTTTTTTTTTTTCTCTCTCTAACCactggatggcggcgttagtatc	ACGAGTCTGCTGGGGGAGTGACAAACTTGAACGTCTTGTCCGAGTTCCTATGCTTGATTTCAGCGTCCATcgactatttatatttgtatg	GAGGCCGATAAGTTGTCTATCA	GGCGTGTGTCTAAGGTAGTAGG
GELC0798	CR_05830C_A	GCCATTGTGTGTTAGGAGCAGATATACATACTATCTAACTACATTTGAGTGCTTGTGAAAATATTGAAGAactggatggcggcgttagtatc	TTAAAAGTTTAATATATTGTTTCTTTGGTTCACTGGCAACCTTTGAACCACCAAGATCATCTAGACTCATcgactatttatatttgtatg	AGATGTCGTTGTTGATGAAGTG	ATCCAAATACTGCCAGTCCTCT
GELC0799	C3_03680W_A	TTGCATCAATTGGAATATTACTTGTTCATACTGGAGTTTTCATTGAACTAAATATTATTAAAATATTATTactggatggcggcgttagtatc	AGATCTTTAATGCTGTGAGTTGGAATTCAGTGAAATTCCGAGGAATCGTAATTGAATTCAATTCAAGCATcgactatttatatttgtatg	TGGTGGATTAATCGGGATCAAT	TGCTAAACAGACTGAACCGTTC
GELC0800	C1_00410C_A	AAGTTCCTGTTTTTTTTTTCCTAATTTTCCCCAACTATTCGTTCTAAGTAATTTCCCCTTTGTCCAAAAAactggatggcggcgttagtatc	CAGTGTACCAAGAAGTACTAGTATTACCGATATCAGTAAAAGATTCATCAATTTTAGAAGGTGGTGACATcgactatttatatttgtatg	CCACATTTCTCCACTTTACACA	TTTTGGTTTCACTGGCAGATCT
GELC0801	C1_12080W_A	TATATTTTCTTTTCAATTCCATCTTCTTTCATTTTATTATTTCTTTTATTGATTTTTCAATCACTTCACAactggatggcggcgttagtatc	CTGTGGAAGATTTGATACTATCACTCATTTGCAAACCAGTTGCTTGAGGGGTAGAAGAAGAGGAAGACATcgactatttatatttgtatg	GAACCGAGAAACAAGGAAAAGA	TCATCTGCTTCGTCGACACTAC
GELC0802	CR_10710C_A	TCAACTCAATATATATTTTTATACAGATTGGTAACAAACCACCACGTTGACTTAAACTTTTGTGATAATCactggatggcggcgttagtatc	GATTTAGTTCATCTAAGGGCTGGTCGTTCTTTAGGGGAAGGATCTGCTGTAATGATTTCAATGCTGACATcgactatttatatttgtatg	CAGACCTCAATGAATTAACCGT	AAGCTGTTGGACTGTTGTTCCA
GELC0803	C6_02920C_A	GCTCATAAGAGAAGAACAATCAAGAAATCAAGAACTCAATTCACGTTTATTCCAAGCTCCCTTATATATAactggatggcggcgttagtatc	ATCCCGGCACCGGAAAAGAATTCTTATTTGAAGTCGGTTTTTTATATGATAATATTGATGTTTCAGTCATcgactatttatatttgtatg	TCACGTACCTTCTTTGAGATGA	CCATCTGTTGTGGCATTGTCC
GELC0804	CR_00370W_A	TAGTTACCCATACACTACAGAAAAAGGGAGTGGGAACCACCTAACAAAAAGAACAATTCCCCGTCTCAATactggatggcggcgttagtatc	ACGATGACGAGCTGATTAGTGATTTTCTTGGTGGTCTAATTTTGGACTTTCGTCCCCCTGGTGGCATCATcgactatttatatttgtatg	CCGTTCAGCCAATAACAGAAAA	TGGGTTTTAATAACGTTTGCCACA
GELC0805	C1_06880C_A	TGCACACAACAATAAACAAATAGAAAGGTAAAGTGTTAATTTTATTTACAACCAAGGAGTTGACTTATCAactggatggcggcgttagtatc	CTACTTTTAAATATAACATACTAATAAAACTGCTTATTGAATTTTCATAGTTTGAAACAAGTTGCGACATcgactatttatatttgtatg	ACAAAGAAAAGAAAGCTGCCAA	TCCAATGAGCTCTCCATATTTCGA
GELC0807	CR_00390W_A	ATAACTTAATGATAATATTAAAAGATATAACACAGTTTCATTCACTACTTTAGCATTTTTCATAATAATCactggatggcggcgttagtatc	TCTTATCTACTAATAATTCCCCTCGTAGTGAATCATCCTCCGAATCTGATATATACTCAGTATTCGACATcgactatttatatttgtatg	TAGACAAATTATTCGCTTGGGC	TGAATCGTCGTCACTATCCTCG
GELC0808	C4_04420W_A	ACTCTCTTTGAAATTAAAAGAATAAAACGATATTATTAACAAATAGTTTTTGTTTGAACTCATTCTAAAAactggatggcggcgttagtatc	CCATTTCATGAACTATTGAAACCTTGTCTGTCGAAAGTTTGGGTCCCCGTACACGTCTTAACCTTGCCATcgactatttatatttgtatg	AGTTTATGTTTTGTCGCCTCG	TAATCCAGAAGACATCGGTGGC
GELC0809	C1_07850C_A	AATACCACAAAGCATTTAGAGACAACCAACCAACTAACCAACTAACCAACTATCATCTATACAACAAAAAactggatggcggcgttagtatc	ATCGTACTTCATGTTGAGAAAAAGAAGTGTTATTATTACTCGATTGATCCCAGTATCCTGATGTATTCATcgactatttatatttgtatg	TAAGTCGAATTGATGGCATGTC	ATGGTGATGGTGATGGTGGAAA
GELC0810	C3_04870W_A	TGCTTTTCTGGGTTTTCTTTGATATTATTTTTCAATTGTCCTTCTTTTTTTCTTATTTTACTTTCAAGTTactggatggcggcgttagtatc	CCAGTGTTGATGACGACGAAGGAATGAAACGGTTACTTGTTTCTGTAATCAATGATCTTGATATTGCCATcgactatttatatttgtatg	CGATAATGTATAAACTCGGTTGCA	TGCAGAAGACGAACCTATGGAG
GELC0811	C6_02300C_A	TCAATAACCACAGTTATATATTGTTATCCACTTATCTCCTCCCACTCTACACAACACATACTATATAGTAactggatggcggcgttagtatc	CCACACTATCATCATATTCTAAGATATCTTCTGGTGATAATCTTATGGTGGTAGCTTCTCGTCTAAGCATcgactatttatatttgtatg	TTCTCTCTGACTTCTTGGTTTC	TGTTGCTGTTGTTGACTCACAC
GELC0812	C1_02230W_A	CCCCATTTTAGTTTTAGTTTTAGTTTTATTATTTTTCCTTCAAAAGAATTAGTTGTATAACAAGTCATTAactggatggcggcgttagtatc	TTGGTGAACTATGATCAGGATCAACAACACTAGTATTTTTTGAAGTATTTCTATAATCAAAACGTGACATcgactatttatatttgtatg	GATCTTTCCCAAGTTCTTCATTT	CTGATTTGGCCAGGGTAAACAT
GELC0814	C2_07360W_A	GTCGTTCTTCTTCAACGGTTTTAGAAACATTTACAACCTGCCCATTTAACGTATTTATTGAACCCCATCGactggatggcggcgttagtatc	CCGACTGAGGTGATAATTCCCTTGCTGTCAATTTATCATCTGCACTATGCTCGTTATTGGCATCATACATcgactatttatatttgtatg	TTTTCAACCTCTTCTCGAACGA	CGTAAGGTAGTGGAGCAGGAAA
GELC0816	C3_02560W_A	AATCATTTTGAATCAAAAAGTTTCCTTTCGGTTTTTTTTTTAAAAACATAAATTAACGGCGTTGTCCGAAactggatggcggcgttagtatc	ATAGGGATGCTATGGATTTAGACCACATAAGTTTATGCTTATTGAGTCCAATTTCTGCTTCAAATACCATcgactatttatatttgtatg	CTTTTGGTGAATCTGATGGACC	CGCGTAGGAGGTTTTACTGGTA
GELC0818	C5_05450C_A	CTAGGACAAAATTTTGTATAGAAAAAAATATACACTTTTTCTTTTTTTTTTTACAACCAACCTCACCCCTactggatggcggcgttagtatc	AAGTGCCTACTTGTCGGCTGGTCGATGACCAGAACTTGTTGCGGTAATCAGCAGAGTCGTTAGACAGCATcgactatttatatttgtatg	AAAGAACCACGACGAAATGAAG	CCTGCAACATTTCGAAGGAGTC
GELC0819	C7_00660W_A	CATTTTTGTTATATAAACTTCATTTATATTATTAGCATATCAATCAATCAATCAATCAATCAATCGATCAactggatggcggcgttagtatc	GTCTAATAGATTTTGGTGTGGCGGTAGTTGTAGAAACAGCGGTTTCTTTTTCCGTTATTGTGGCAGACATcgactatttatatttgtatg	CCACAGTAACAACCAAAGCTAC	CTTGTGGTGTTTGTGGAGATGG
GELC0820	C7_03810W_A	CTTATAACATACCATTACTCCCCCTAATATATTGTTAAACACTTTGCCCCCCCCCCCCCCCCTTAGCCCAactggatggcggcgttagtatc	TCGGGGGTACTTCATCAGCATTACAAGCTTTTTTAACACTTGTTTGTAAATCAACTTCAGCACGACTCATcgactatttatatttgtatg	AAGAGAAGGAAGAAAGGAAGGG	CATGACTAGGGAAAACTGTTGCC
GELC0823	C1_04050C_A	CAAATCAACAATCACCAACAAACTACTAATCACTCTATAACATCAACTAATTAAATCAACAAAAATAACAactggatggcggcgttagtatc	TGTATTGAGCAGGAGCAGCAGCAACAATAGTGGCAATAGTAGCAGTCAATAAAGTTAAGGAAAATTTCATcgactatttatatttgtatg	CTGCGAAAGGAATTTTGTTGTG	TCCGAAATTGGTGAGTCTGAAAC
GELC0824	C5_02540C_A	TTGCATAGTTTATCTTGGTGTGTGATAGGTGTTCATAGAATAAGAGTTATTATAAACAAATTCATTATCTactggatggcggcgttagtatc	TGTAAGTAAATGAAAAGCAAACCAGGAATCTGCTTACTATATAAACTGACCTACGATTATTGCTTGTCATcgactatttatatttgtatg	TGTTGAACAATTTTGCTGTGGA	TGTTTTCTTTCCCAAGTCGTTT
GELC0825	C1_00890W_A	ATGATCTTACAATTGAATTATCCATAATAAAATCCAGTGAAAACAAACCCTCTTGCACAACTTCCTAAAAactggatggcggcgttagtatc	AAGTGATTAATGATGATTTTCCAACTGCATCATCTCCACAAACTACAACTCGAATTGCATCTGGTGACATcgactatttatatttgtatg	TCAAAAGATTCCAGAAGTTCAACA	CACGTTTATTGTTGTGTTTTCGT
GELC0827	C1_12450C_A	TTGGCTTTTTCAATTCACATAGACATTATATTTGCTTCATTGTTATTGATAAGAGTTGTTAATTCCACAAactggatggcggcgttagtatc	ATGACTCGATTCTTTTCGCCAACGCCTGAATAAATATAAAATGGTCATCTTTCATTATGGAATCACTCATcgactatttatatttgtatg	CACCCACATCATCATCAAACAA	TCATCACGATATTTGAGTTTGTTGT
GELC0828	C3_05000W_A	TAGTGTGAATTCTATTTCTTTATTATTTTTATACATTTCTTGTTTTATATTATTCTAGTAAATTGAAAAGactggatggcggcgttagtatc	TCTTTTCACCAACAGTGTATCCTTCAACTTTTTCAGGAACTAAATCATCATCAACGTTAGAATTGGACATcgactatttatatttgtatg	GCAAAATGGACTCTCTCTCTCT	TCTTTATCAACGATGGTGTTTCC
GELC0830	C1_02870W_A	GGAACTGACATTTTAAATATCTAATATATTTCCTCCTAGTCTACATTATTCATAGTTAATTTCAATTTCAactggatggcggcgttagtatc	CTGAATTTGAGGATGGTTTCGAAATGCCATTGGTATTATTCTTGTTATTTGTTAAACGATGTTTTGACATcgactatttatatttgtatg	CAAAGATGTGGTGTAGATTGCA	TTTGCTGGGGTAGAACAACTGA
GELC0832	CR_00440C_A	TTTTGATTTTGTTTATTATTTGTTTTACTGGGTTTTGTTTTGTGATTTTGATTTTTGACAGTTTAATAACactggatggcggcgttagtatc	ATGCATTAGGGTTGCCAAATGAATGGTGTATACTATTACCTCGTTGAGGGGTATCAAACGAATGCTTCATcgactatttatatttgtatg	CCCAACACAACTCAACTCATTT	GGGAACGAGAATGTCCAAATGG
GELC0834	C6_02980C_A	TTTTAACTTGTGTTGAGTTATTAATCCATTTCCTTCTCTCTCCATTCCATTCATCCTTCCTTTTTTGCAAactggatggcggcgttagtatc	GTGAATTAGTGGATGGTCTAGGGGATGGAACATTGGTATGTACAGTATCTTTTTTTTCAAACACCGGCATcgactatttatatttgtatg	AACTCAAACCCAAACTCAAACC	TGTCCCGGAAGTTGAAGAAGAG
GELC0836	C5_01130W_A	TATCAAATCATATCTCATCACTTTATAATCACATTTCCACAAACAATCCAATCAAACACTACGAATCAATactggatggcggcgttagtatc	AGGGGGTGGTAAAAAAGCTTGTAGCTTTAACTGTGTCCTGGCTTGGTTTATCTGCCCAAAACCAACCCATcgactatttatatttgtatg	TTCTGTGCTTACGTAACAATGG	GGCATGTTGGAGAAGAAGAAGC
GELC0837	C1_13680C_A	CATAATTATTTTTTCATTTTAGATTAATTTATTACTTCTTTCTTTAAAACCACACCCAGCATTGTCAATCactggatggcggcgttagtatc	ATGTGGAGAAAGATCTAAAAGTTGGTGTAACAAGTCTCAATGAAGTTGGTCTTAATAATGTTCTAATCATcgactatttatatttgtatg	TTTTCTCTTGTTTGTGTTGGCT	TCTGGCAAGTCAACAAATGTGAC
GELC0838	C4_04100C_A	TGAATGAGATGAGGTAACAATTACTACAGCTACTACTTATTTTGATTTTGATTATACACAGATACAAATAactggatggcggcgttagtatc	CATTACTGGTGTCTGTATCTATTAATCCTCTTCTAGCAGCTCTACTATGTTTCGATATTTTCTTTGCCATcgactatttatatttgtatg	AGCGCATTGTCTATTTCCAAAT	CCCATCCTGACTTACGAGCATT
GELC0839	C3_06480C_A	ACTTATCTTCATTAACCCTCCTTTCTCTTATCCCATATACATAATATAATTAATTATTTCACATTCAACAactggatggcggcgttagtatc	AATTGTGAAGATGAGTCATACATACTGGTATTAAACAAATATCAGCCAAACAATGCAATGTTACTGCCATcgactatttatatttgtatg	TGGTTGCCTCATATCTCTGTTT	ATGTAACGTGGTTTCAAGGGGT
GELC0840	C4_06070C_A	TTTTTCCAGCTGATTTTTTTTTTCCACTAAGAAATGCTGATTCAGGTTTGATTGGCCACTTCATAGTGTAactggatggcggcgttagtatc	GAGTTGATTGAGATATGTATCGTCGATAATGTGAAAATGCCCCACGACATAAATAAATAGGTGTTATCATcgactatttatatttgtatg	GAATGTGTTTGGCCAATTGTTG	AGCTTATTTAAACTGGCCACGC
GELC0841	C1_13600W_A	AGGTACTGAAATTAAACTTATCAATGATTATAATCCGATTGAAGCATCAAAAGAACCATTGTTTTCCCCAactggatggcggcgttagtatc	ATTTTTTAGGTGGTTTTTTCAAAAGAGCGGTGGTTTTGGGATTACTAACTTCAGATAAAAACGGTACCATcgactatttatatttgtatg	GGTTGTCCCTTGTCAAGAGATA	TTCTTGAGAAAATGGTTGCGGT
GELC0842	C1_07510W_A	CTATATCTATCGTTTTTCAAATTTCACCTATTATCAAACATCCTTATTCTATATATCTCTCATTTTTTTAactggatggcggcgttagtatc	AAGACATTGCTCGTTGAATAATATTTGGATATCTAAAATTGAATATTGATCGTGTTAAAATAGTTCTCATcgactatttatatttgtatg	GAGGGTGTATGTGAAGGTGTAA	TTCACCAAAATGACGTACTCCT
GELC0843	CR_01570W_A	TAATTATATACATTTACGAATTAAAGTAACTGTTTTTACAAAACCCTCTATATAATAATAATCCTTGGTAactggatggcggcgttagtatc	GAACATAATATCCTGTTACAAACGACACAACACCTACTGCTATTAAACTTAAATTTGATTGGCTTGTCATcgactatttatatttgtatg	TCACACAGCAACACACTTTAAA	CTGCTGCTTTACCTTTACCCAT
GELC0844	C3_06910C_A	TTGATTATCAGGCATAATTAATCTATTTTCCCCATAAAACAAGAGAAACTTCAAAAGTAACACTGGCATTactggatggcggcgttagtatc	AAACGTCATCATGTTTCAATTCATCCATTAACAAAGCTAATGGGTATAAATCATCACTAAAATTATTCATcgactatttatatttgtatg	GTTGCGTTTTGGGAGAAATTTG	GTTCAGAATATTGATGACCACCA
GELC0846	C7_02810W_A	TTTATGCAACATCACGTGACCTTCTCTCAGCAAAAAAAAACCATTTATATATTCCTTCTCATCCTCGCAGactggatggcggcgttagtatc	GTTGCGACATGGTAGTGTGCGTGGCGAAAAAAAAAGATTTTTTTTTTTTTGTTTGTTTTTTGTCTCTCATcgactatttatatttgtatg	TATCCAAGTAGAATGTCAGCCC	AGCAATTTCACCCCTCTCTTCG
GELC0847	C7_02530C_A	TCTCCCCCCCCCCCCCCTCCCTACTTCACCAACTATTCACAATACTCACAAATCTAACGGTACATCAAACactggatggcggcgttagtatc	CAGGAACATTAGTCAAATCATTTATCGTTAAATTGAAAGCAAATTTAGGTTTACTTGATGATGATAACATcgactatttatatttgtatg	ACGCACACTACCATCAAAATTT	CTGGTAGTCATGGGTGTGGATT
GELC0848	C6_04080W_A	TTTCTTCAACAACTTCCCTTCTTCTTTGACGTCACCATTTTATTCAATCGAAATTAATTATTAAATTATTactggatggcggcgttagtatc	TATCAATGTTTAATTCATTGATTTTTGATTCAATTACTTTGGTGTCTTCACCTTCAGTAACACCAGCCATcgactatttatatttgtatg	ACAAACTGGTCTATCTTGTGAC	CACCCGATGCTGTAGAAGTAGA
GELC0849	C3_00260C_A	ATTCGAGAGAGAGAAAAAAAAAAATGGTTCGACTTTTATTGTAAAACCTTTCTTTAACCACACCACTGTTactggatggcggcgttagtatc	AAGCGGCCAAGCAACCAACTAGACCCGCTCCAACAATCCCAATTGTCTTTTGACTCTCTTCTTCCAGCATcgactatttatatttgtatg	ATTTGTCTGAGGCCGAAATAGA	ATTCCTGTTTCGTCCCGGTAAT
GELC0850	C1_10770W_A	AGACAATTAAAGAAAAGAGTTTGTATCGCCACAGACTTGAATTGCCTAATCGTTCTATCTATATTATAACactggatggcggcgttagtatc	TAGTTCTATTCGACCGGTCATTCCAGTTTCTGAACAGTTGCCTGAACACATTTTCAGACTCAGTCGACATcgactatttatatttgtatg	AAACAACACGGAAAATGGGTAG	CTCCAAGACAACACCCAAAACC
GELC0852	C3_03470W_A	TTTGATTCTTCTTCTATAGTATAATAACTAACTACTTTTAACAAATCACTTACCATTTGACTAATTCAACactggatggcggcgttagtatc	AGTCGTACCATTGACCATTAATAAATGGTTTATTTTGAAATAAATTTGGGTTATTTAATTTAGGAGCCATcgactatttatatttgtatg	CATTCCATTGCCACAACTTAGT	CTTCTGGGGTTTGGTCAGGTAA
GELC0854	C5_01560C_A	TTTAATTTAACCTTCCCGCCTTTCTTTTCTTCTTTTTGAATTATATCGATTTTAAAAACTACACTTCATCactggatggcggcgttagtatc	GTAAAGTAAAAATTAAACCAAGGACAAAGGCCGTTAATGCTATTATTCTTAATTGTCTAACTCCAGCCATcgactatttatatttgtatg	AGCATTGAAAGAGGAGAAGTGA	TGGCTTCATCTTGATCTTGTGA
GELC0857	C1_02150W_A	TTTTAAAAAAAAAGGAAAATAGTTTTACCAATTTTCAACATATACAACTCATAATAATAAAAACTTAAACactggatggcggcgttagtatc	TTAATTCAATAACTGTATGAGAACCAATGTAACCTGCACCACCAGTAACAAGAATATATTCGTTTGACATcgactatttatatttgtatg	GTTACATTGGTTCCTCTTCGTC	AGCAGCAAAATGAATGACTCCA
GELC0859	C3_00200C_A	TTCAACGATGTACTCTTTATTGAAACAATCCATTCGTCCAAACCTGTTAGTTGCTCAACAGTTTAGAACCactggatggcggcgttagtatc	AATTTTGCGTAAACAACACATCTTTGGGTTCACCGTGTTGACTATAAAGTACAGCCTGAGCAGTGATCATcgactatttatatttgtatg	GAAATTTGTACCGCCAGAACTT	AACCCTTCGTTCCCACATGG
GELC0860	C1_14160W_A	TGATCCTTTTTTTCATTAGGGTTTCTAGACATTGTTGTCAAGATCTGCACAATTAGGTATTTGTTATTCAactggatggcggcgttagtatc	CTCGCCAAAATGAGTTTTTATTCAACCAGTTCTTCAATGGTTCTACTTTACTTGATAATGTAGACGACATcgactatttatatttgtatg	CTACCAGTAAGACTCGCCATAG	TCCAAACATCCCTTCCGATAGT
GELC0861	CR_04590C_A	TCTTTTTTTTTTTTTCCTTCTGAAATATTTTCCTTTATTTTATTTTACTTTTTTCAGTTCCAACAGATCTactggatggcggcgttagtatc	TCATTTTTCTAATTGATGCAATACTATTTTCAATTGGTATACGGTTTTTGGAAACAACTTGCTTGAACATcgactatttatatttgtatg	TCCAGACTTAGTTTTCTCCACA	TGTCTTGGGCTTCTTTAAACCA
GELC0863	C2_02020W_A	ACATTTAAGCTATTTTGTTTTTTCAATTCTTGCTTTCACTACCGTTTGCATAACAAGAAATTACCCTAGAactggatggcggcgttagtatc	AATCATCTTTGTAAATTTTAGTATTTGCAGGAATGGTCAGCGGGATATCCGAAGGTAATTCTAATGTCATcgactatttatatttgtatg	GTAGGCTGTGTTGAAGAAAGTG	TCCCCGTTTTGTCATAATTTTGT
GELC0864	C3_07400W_A	ATAGTTGCACGATAATTTTTTTTTTTTCTCTTTTTATCATCTCATCAAACCAGGTTGCAAGTTTATAATTactggatggcggcgttagtatc	TTGCTCTCCAACCTTCTTCTTTAGCTCGTCTATAGTATAAGTCACGTTTGTCCTTGCTGGCTTTCCCCATcgactatttatatttgtatg	TTTTCTTGTTGCACTTGGTTCA	TGGGAGTCATAGGCTGTAAATCA
GELC0867	CR_02400W_A	AGGATTATTTTCTTTTCCCTTTTCTGATTACTTTCACCAATTTTCTTCTCTCCAAAAAAGCATCTTCTTCactggatggcggcgttagtatc	CAACATCTTGGAAAACACTTTGACTAGTTAATAACAACCCGTTATTGATTAATTTAGAAACAGAAACCATcgactatttatatttgtatg	GTGGGCTCTGTTTAGTTTAACT	ACCATTACTTTTACTTGGGTATCT
GELC0868	C4_01730C_A	TTTGATTTATTACATTATCTTGCCATTTTTTATTATTTTTTTTTTATATTTTTACTCAATTAATTAAACAactggatggcggcgttagtatc	CTAGATATTTGAAATAAGGACACAGTTTATCGTTCAATGGACCATCATCATTAGTTAAAACCACATGCATcgactatttatatttgtatg	GTATGGTTTTATGAATGAAGGAAATG	TGAAATTTGGGTTCTGGTCTAA
GELC0869	C3_06560W_A	TTAATACATTTAGAGGAGAGATCAATAGATAAAGAACAAAAGAAAGTATTCAAAACACGTTTTTTCAAATactggatggcggcgttagtatc	GTGATTGTGATTGTGACTGAGATTGTTGGTCTAGTGACTGATTCTTTTTATCTATTTCTGTGACAGGCATcgactatttatatttgtatg	TTATCCTTCCTTCCTTCCTTCC	GGTGGAGTTATCGGTGATGTGT
GELC0870	C3_07040C_A	CTGATTTCGTTCTTGTTGTTTGCTCCCTCCTCGTAGTTTAGAACAAGAATTCTGCTTGTTTTCCCAATAAactggatggcggcgttagtatc	ACATGAAACGTTTAATTAAGGTTGTTGTTGTTGTTGTTGTTGTTGTGGGTTTGAATAATTGTTTAAACATcgactatttatatttgtatg	TACTGGATGGTTTTCGGTAACT	TGATCTTGTTGTTCTAATGGCCA
GELC0871	C5_01700W_A	CTGAAAGGATTATACTTATCATCATCATATAATAGTAGTATATCTATTCTTTTGATTAATAGAAGTTATTactggatggcggcgttagtatc	ACGTTGCTTTAGACCTGGTAGATATAGATACCGGAAATGGTTTTAATGATATTATTCTTCTAGTCAACATcgactatttatatttgtatg	TGGTGTTTGATTAGAAAATGCCA	TCGTTTAATTACACTGCCATCACT
GELC0872	CR_03490W_A	GCAGTATTAACATGATATTATGTCAAGATTTTGGCATTTCAAAAAGTTCTATTTCACCCTGTGCTACTCAactggatggcggcgttagtatc	CGTGTTCTGACGTGACATTCATTGGAACTAGAGGTTCATTCTTGAAAATCTTTCCCCGCATTCTTTGCATcgactatttatatttgtatg	GGCTTGAGGAATATCTAAACGG	TGTTGTATCTGCTGCTAGAACCA
GELC0873	C4_04440W_A	ACCACTTTTTTTTTCTATTTTTATCAAGTATCCCCAAAACAGGCTAATCAATAAATCAAAGAACGCAAAGactggatggcggcgttagtatc	CATAAATCAATGGAGTGAAAACAGAAATTTTTACAATTTCCGGTTCAGGAGTCACGGTTTCTTCTGCCATcgactatttatatttgtatg	AGAAGAAATAGTGATGGCTGGT	TCAACTGCACGTCTCAACAATG
GELC0874	C1_03390W_A	TTCAAGTCTACTATATTTCTTGCTTTTACTTCTGTCAATCAATACATTTTGAATTAGTCAAATTATCATAactggatggcggcgttagtatc	TAGCAGAACCTTCATCGCCTGACTGATGAATCTTAATGTTTGATCTGAAACCCCAGCCTAATATCCCCATcgactatttatatttgtatg	GGAGTTAATGTCCGGATTACAC	ACGGGGTTGTAATCTAGGGAAC
GELC0876	C1_10140C_A	GATCAGATCAAATCAAGTCTTTGTTTAGTTATTGTTTTATATTTTTGTTTTGTTTTACAATTTACCTTAAactggatggcggcgttagtatc	CATTAGGGTTTATTAAGGACCGATAAGGAGGTAGATAACTGTGGAAATCAAGTGAATCCGTCTTTAACATcgactatttatatttgtatg	AACCCATACAGCTGCAATTAAG	AGCACATTGTTATTATTAGCACTTGA
GELC0877	C5_00220W_A	CCCCATCCGCGAACAAACGAAATCTGATCTTAGTTGTAGTAACTTGCTACAGTTTACAATCCAAGTCAATactggatggcggcgttagtatc	ATTTGAACAAGTACTCCTTTACAGCATTCACTGACGCAATTATAAAAATTATTGTTAGAAATAATTTCATcgactatttatatttgtatg	TTTCAGCTACCAAGAAATGTGC	ATGGGAATTGAATGGGATGGTC
GELC0878	C6_03940C_A	GTACAATAATTAGCAGCGTTCAATAACAAAATAAAAAGCGGAACATAAACTAATACTCACCAAGTACGATactggatggcggcgttagtatc	GAGGTGTTAAAACTGGTTCATCTGGAGTATCCACATGAATGTTATTTGTATCGTTTCCGTCGTCTGACATcgactatttatatttgtatg	AGACAACTTACACACACCACA	GGGGCTGTCTGTTGTAGTTCTT
GELC0879	C7_00400W_A	TTTTTTTTTTTCACTCCAGAAATACTCCCCTTTTCTTATTCCTTTCTTTTAAAACCAATATCCAAAAAACactggatggcggcgttagtatc	CTTCATTGACAATTTCGGTACCGACATGGTCACCAGGCAAGACAGTAATGGTTTTGGTTTTAACAGACATcgactatttatatttgtatg	TACAATTGAATGGAGTGGTCAT	CCAACAAAACTGCATCGGATGA
GELC0881	C1_01750W_A	TGTCTCAAAAGAAACAAGTTACCGCTTTACTTATATCCACTTGAAGAAACAAGGACAACCACAAGCCACCactggatggcggcgttagtatc	CAAACATTTGCCAAAGTGGGAAACCTTTCATTTGTTCTCGGAAAGAGATCTTTGCCATTTTTTTTGTCATcgactatttatatttgtatg	TGTACAAACACCCTCACTAAAA	GGATGCTTTTCCCCATTGTACA
GELC0882	C5_01050C_A	TGAGTTAAGAAAAAAAATTTTTGATTCTACAATAAAACCAAAGCCATATTTCAACCATACCTGTCAAGCAactggatggcggcgttagtatc	AATAATGGAAAGATCTTATTGGTTGTATGACCGATTTTACACCTAATGATCTCGTTATTAATCCAAACATcgactatttatatttgtatg	GCCTCTTTGTGGGTTGATATTT	AATGCTCGTCTTTTACCCGTTG
GELC0883	C2_09970C_A	ACAAGGTTAATCTAACAGAAATATCCTTATTTCCTTAACTTCCTTAACTTTCTTAACTTTCTTGAATAAAactggatggcggcgttagtatc	GATCAGCAACTGCATCAGCAACTCCTAAAAACTCAGGAAATGAATAAATCAATGGAACTGTTGTAGTCATcgactatttatatttgtatg	GGTGGGTGTGGTTTGAATTATT	GAGTATTCAACGCGCCTGATG
GELC0884	C1_09260C_A	AGGCAGAAAAAAAAACAAGGTGTAGGCATAACACTGATTAACTGGCAAGTATCAAGTAGCACCTATTCTAactggatggcggcgttagtatc	TTGTCGGAGTGCTAGGCGACGACGTTGAGGAGGACACTGTTTTTGAGTTGTCTGTATCTGTTGATGCCATcgactatttatatttgtatg	CGTCATTTCGGTTTTCATTTGG	ATTTTCTGCAACCCCAACCCTA
GELC0885	C3_05420W_A	ATCTTATTTGGGATTTACCATTAGTTTGTACAGGATATACTTTTTTCTATGGATCAATATTTATTACCACactggatggcggcgttagtatc	ATTTAATTACATTATCTTCATTTAATGAAGATGATGAAGAAGACGATGTGAATATATTTTTGAATGGCATcgactatttatatttgtatg	CCAGTGGTTGTTTGAAATGAAC	AGTTCCAGTAGTTCCAGCAGTG
GELC0886	C1_03010W_A	CTCCATATCAACAAACTAAGAATAGTCTGCTTTGCTTAATTTGATTATCTCTAGTTAATTCCTTATTACAactggatggcggcgttagtatc	CAGAAGTGATTTCAACTTCGGCGTCAGCTAAGATTAAAGCGGCGTATGATAATGCAGATTCAGTAGACATcgactatttatatttgtatg	AAGGTGCTAGTATCGAGTCAAG	TCTTCTTCAGCAGCTTCTTCGG
GELC0889	C3_03410C_A	TATAAATAGATTCACATTTCTTTATCAATTGTTGAGTTCCTATAATTTAAACTAAGAATAACATCTAACAactggatggcggcgttagtatc	ATGAACCCCATTGTCTAAATTTGATATCCTTTAATCTTTTTTCTTCAGGAGTTGATCCATCCATAGTCATcgactatttatatttgtatg	GAGAGAATGTACTTTGGTGGTG	TCTTTCCCATTCCATAAAGCCA
GELC0891	C2_02090W_A	GTTTTCCCTGACAATTGAAATTTAACAACCACACACAATTGACAGACACATTTCTAATTACATTCTTAATactggatggcggcgttagtatc	GGCCAGAAATGTCCACTAATTCATCCCTAAAATTGTCTTCACTCTCATTTGAGCTTAACTCAAGTGACATcgactatttatatttgtatg	TCCGTTATTCATACCAACACCA	AGATCTGGTGGTATTGGAATTGA
GELC0892	C4_05580C_A	TTTCTTCTTTATCATAACCAACAAACTCCCAACCCCTTTGTTTTCCCTTAATATCTATTAACCATTCGCTactggatggcggcgttagtatc	CAGCTGGAGCAGCAGCGACGGATGAGATAGCAGCTAAAACTAAGGTGGCAGTGGCGAAATCTAACTTCATcgactatttatatttgtatg	ATAATTTGACTTTGAGGTGGGG	TGGCAGTCAAGACATCAGTGA
GELC0895	C4_03140C_A	TAATTCGTTGGTGACAAGTTCTTCAGTTCAACTTTATTTCTCATTACTCATCTTCTACAATCAGTGTAATactggatggcggcgttagtatc	AAGAGGAGTTTTCTTTGAGTGATAATAATCGAGTCAATAACACAGTTGCATTTTGTGAGGTAGATGACATcgactatttatatttgtatg	CATCTTCTGCAAACTCCTTCTG	TCATTGGATTCTCGCAAAGGGT
GELC0897	C2_01860C_A	CCCAAACAACATAATCAAGAGAAGAACCCCACGTTTCCTTCAATCTATAACCCGGGTTTGATACTCAAGAactggatggcggcgttagtatc	ATACTGTTCCTTCAATATCTAAAATCACTGTATCAATTGGGATATCATCTGTTTTGGCTGTAGTTGTCATcgactatttatatttgtatg	TGAGGTTGGTATGTATATTGAAGT	CGCTTGATTTAGTGATATTATCTGGT
GELC0898	C2_10010C_A	AAAAATTTCCCAAACCCACTTCCACCACCACAGTCAATACATACACACTACACATACACATTTAGATACAactggatggcggcgttagtatc	CAGTAGTTTCGTAACCAGCTACAGTGGCAATTGTAGCTGCAAATGCAGTAAAAATGGTGGATAATTTCATcgactatttatatttgtatg	GTAACAAAATTTCGGGTGGGTT	TTGACCAGTTACACCGACAACA
GELC0899	C1_09280W_A	CTCCAATAAATCACAGAAAGGCACCAGATTAGATCATTGTCTATTAATCCAAAGCTAAATAAATAACTTTactggatggcggcgttagtatc	TCCTGATTTCATCTAATGTTGACGTGGGAGATATCCCTAGGATCTTAAAGTGTTGTACCGTGGGTTGCATcgactatttatatttgtatg	GATGACACATTAACCATTGCCA	TGTGTTTGTGTTAGGGATCGGT
GELC0900	C5_00400C_A	TATTGTAATCCTTTGTTTTTCTTGTATTCTTCCTTTCAATCGGCTATAAGTTAAACCTACTTTTTAGACTactggatggcggcgttagtatc	TAACTGGAGGATAGGTAATATCTTGCGTTAGAACTATAACTTCGTTATCATTATTTGAACTACCATTCATcgactatttatatttgtatg	ACAACCTACTCTTACTCTTCCT	TCTCTAGACGACGATGATGACG
GELC0901	C2_09080C_A	TTTTACTATTTTGTTGGTATTTTCTTTCTGAAAATGCAAAAAAATATATAACCATTGAAACTCATCAACGactggatggcggcgttagtatc	ATTTATTAGGGATTTCTCCTTCTACTCCTTTTACTTCTTTGTTATCATTTAAGTTTGTTTGCTTGTTCATcgactatttatatttgtatg	TATGGGTTGTACGATTAGGCTT	CCAAATGTGACAGTCAACCCAC
GELC0902	CR_08880C_A	AATAGTATTCCTACTTCTCTTCTTCTTTTTTTGGTTCTTACAATTATCAAGAATCAAATCTTTATCGATAactggatggcggcgttagtatc	TTGCAGCCTGAACGATCGAGTAGGAACGATAAACTATTAGTGGGGAGGATTGAACGACGGGTCGTAACATcgactatttatatttgtatg	TGGTTTGCAATAATAGGTTTGGA	CCATGTCGATACCTTCAGCAAG
GELC0903	C6_02550W_A	TTTGGTTGAGGGAGGCCAACATTTTTACAGCCAAAGGTTTGTTGCAATTATATATGAACTCATTAACACCactggatggcggcgttagtatc	GAGGATTTGTACACAAGTAACTATACTGTATTTGGTAGTAGTTTTCAAGCAATCGGATGGATAATGACATcgactatttatatttgtatg	GAGATCTCATCAAATGTTGTGGA	TACGTCATATTCCAATAATTCCCA
GELC0905	C3_07220C_A	GACTTAGTTAGTCAATCACTCTACCCCCCCTCCCCTCCATTCTTCCTATTCACCACAAATCATCCCCAATactggatggcggcgttagtatc	GATCATTGGTTAAAGTTTTCAATGAGGCAAAAGCAGAGTTGGCAGCTTTAGCTATAGTTTCTGCTGTCATcgactatttatatttgtatg	TATGTACACACTATGACGAGCA	TTTCGCCAATGTGATTTTCCCC
GELC0906	C7_03590C_A	TTTTAACTTTTTAGTTGTATATTTTTATTTTCATTCATTTAAAACTCATACACCCACCAACATATCTATCactggatggcggcgttagtatc	CAATTGATGCTCTTCTTTTAGTATTAGAATGAGTGAATTGATGAGTTCTATCTGGATGTGATGATGACATcgactatttatatttgtatg	CTTTGTAACTCTCCTCCTCCTC	TGTTGAAGGAGAATTACCAAAACT
GELC0907	C1_12100C_A	GAGAGGATTATTTATAACACTCTTTTTGTATGAAGAATTAATCAACAATATACCCCATAACCTAAAAACCactggatggcggcgttagtatc	TGGACTTGTATACCTTCAACAATGATAGTGCCAACGAGTTCTTTTGTAGTTTTGAGTTCTCTATTGACATcgactatttatatttgtatg	TATGAACTCGGCTTGTAACGTA	TGAACGACTCCTTTGACAACTT
GELC0908	CR_02150W_A	GAACTCTTGTATGGGACATAGCATATACACACCAATATAACTTCACATACAATTCCATGAACTCTTCAATactggatggcggcgttagtatc	GTACTTTTCCCATACTTTTACAAGAACTCGTAAAAGCTTTAGAAAATATCAATCTATTCATTCCAATCATcgactatttatatttgtatg	AGCTAATACCGCCAATCAGTAT	CGATTCCGGCTTTGCTAATCTT
GELC0909	CR_00330C_A	CTAACCAATATATTATTTGTTGATTTACATATATTCTGTTCTTATCTTCTAAGTTTCATTGATTGTTGAAactggatggcggcgttagtatc	CATGTAGTAATAACAAGATGTTTTTAACATCCTGTTTATTATATCCAGCTAATCGTGATATGTTGATCATcgactatttatatttgtatg	TAGATGAGGTTTAAGGGCTGTG	TGTATATCTCTCTTGCCCCATT
GELC0910	C3_03520C_A	TTTAAGAACTGATACTGTTGAAACTAAAGTACTACAAAACTATTATCAAAGCTAAACAAGACCATATACCactggatggcggcgttagtatc	CATATTCCACTTGGTATAATCTACCTTCTGGTGAAAAAATAGTGGTTCTTGAATCGTATCTTCTTGACATcgactatttatatttgtatg	AAATTGGTGATCTGCGACATTT	CTGTTGGGCTTGAATTCTTGCA
GELC0911	C6_03140C_A	CGAGTTTTTGATCAATCTTTAATACTTCACACCAATCACTATTTACTGGAAAAAGATCAATATACATTGAactggatggcggcgttagtatc	CAGGTAGTACCTTTATACTTTTCCTACTAGAAAGGAATAACAAATTCCTTACAGACGGTAATATTATCATcgactatttatatttgtatg	GTTGGGTCAGAAACAATGATGA	GTTGCATCGAGGTGTGATTTCA
GELC0912	C5_01270W_A	AACAACAAAAGAATCAAAACAAGGTTAAAAAGAACCGAAAGAACCTTAAAAGAACTTTTTACACATCACCactggatggcggcgttagtatc	CGGTTTGTTCGGGAGTTTTCCATGGATTTGTTATATGTGAAGATGGCGGCGATGGCATTCGTTGTCCCATcgactatttatatttgtatg	AATTCATAAAAGTGTGGGAGCC	CTTTCGTCCCATCTCCTGCATC
GELC0913	C1_11770C_A	TATTTTATTTTTTTGGTTTAGTAATTAATTATACAACCCTTAGGACAACCTAACAAGATATATTATTATTactggatggcggcgttagtatc	ATTGATAAAATCTCCAAGCGTAAAATGCAACATTTGGGTTAGACCCAACTAGTAAGCATGATGTTGGCATcgactatttatatttgtatg	TCTCTTTCGTTCTTTCTGTCCT	AGCAAATGTGTTAACCCTTGACA
GELC0914	C1_01350C_A	ATTTTTCTCCTTTCATTTCTTCCTTTTTTTTATTTTGTCTTGATCTTATATTAACAACAAACACCTAATCactggatggcggcgttagtatc	TGTAGACGACGTTATCGTAATTGGTTTCAATTAAACCAGAGTCGATTTCAGTAATACCTTCGGATGCCATcgactatttatatttgtatg	AATGTTTCTGTAGGGCGAGAA	GCAGAAATGGTAAAGGTAGCGG
GELC0915	C6_01630W_A	AATCAAAAACAAATTCGAATAATTCAATAAATCTACATATCCGATATTATTAATCAATTAATTATCCATCactggatggcggcgttagtatc	CTCCGCCAAAGGTGTCATCAGCCAAGAAAGACCCTAAGTCCATTTTAACATTTTTTTTAGGTGGTGCCATcgactatttatatttgtatg	TCATCGCATTAAATATTAAGTGGG	AAAACCAGAACCAGAACCGGAT
GELC0916	C4_06270C_A	ACACAACACAACTTTAGAATCTTTTCATCACAGCATTTCTTTCTATTGCCAAAAGGATATTATACAAAAAactggatggcggcgttagtatc	GTTCTATTAAATGAAGTCCCAAAAATCCTGATCCTCCAATGATTAATACTGACTGTAAAGATTCACTCATcgactatttatatttgtatg	TTGGGCAATAGTCTGGTGTATT	GTAATCCATGCATCGGTGAAGC
GELC0919	CR_08090W_A	TCCTTTCTTTCTTTCTTTCTTTTTCCTCTTTCCCTTCAATTAACCTACACTTATACATAATCTTAATAAAactggatggcggcgttagtatc	AAGTAGCAACACATGAGTAAGTAGTACCTAAATCGATACCAATAGCACCTTGGAAAACACCGTCAGCCATcgactatttatatttgtatg	GTCATCGCACTCTTGTTCTTTT	ACCAATCAAACGCTTAGCATCG
GELC0923	C7_03620C_A	GATCAAAACAAAACAATCCAAAAACATAGACATAATCAATTCTAATCCATCAACAGCTTCATTTTTTTCTactggatggcggcgttagtatc	TACATTTATTTATTACTGAACCAACTAGTATAATCAGTAAATCTGGATTGATCTTTACTTGTTCTGACATcgactatttatatttgtatg	GAAATTTGTTGATATAGACACCAATC	ACATGATCTTGGGTCACAGTAACA
GELC0924	C1_14420W_A	TGTACGTGACTATAAATGTCGATTTTTTTGCCACTGAAACATTCTTTTTTCTTTTTTTTTTTCTTCAACAactggatggcggcgttagtatc	AGCAAAGTGAGTCAGGTACGTCAACAGATATAATATCACCAGAGTGGTCTAAAGAAATGGTAAGTTGCATcgactatttatatttgtatg	GGGTGTTGATGACTGGAGATAA	TCGCTAATCTGGGTGTCATCAG
GELC0927	C2_08850C_A	ACAAACTAGGGCAACAAAAAAAGACAAAAGACATAAACCCTCAATCAAAAGATATACATAAATATTTATCactggatggcggcgttagtatc	TTGGTTTAATGGAATTAGTAGTGGTGGAGGTCATTATTGTACGAGTTGATAGTTTGAAAATTGAAGACATcgactatttatatttgtatg	CCCACCCACTCAACATTTAATT	TCCCGTTTGTTTGATTGAAGCA
GELC0930	C3_07850W_A	TGTAGAAAATTTATGAACAAAAAAAAATAAAATATTGTCGACTTTTTTTTTTTTTTTGTAGCACACCATCactggatggcggcgttagtatc	TCTCCAAGGCTATAAGAGTGGATAAATAGGACTTTATGGTATGGGAAACATGGTGGAGGTGTTTATGCATcgactatttatatttgtatg	GTGTTGTATGAATGTTTCCCCA	AGCAAAAGTACATTCCCAACGC
GELC0931	C2_10570W_A	ATCAAAAAACAACAAATAAAAAAAATTATACACGCGTAATCAGCGTCATCTTGCAACAATCGTTTAGCCAactggatggcggcgttagtatc	CGGCCTGTGGTGTTATATGAGGGTTTGTTCGTTTCACCCAAGCCACTTGTTCTTGCAAATTATTTATCATcgactatttatatttgtatg	GCATGTTGTTGGGTCTGATTT	ATATCACTTGTTTCTGGCGGGA
GELC0932	C5_05400W_A	AATTTCTATCAACAACAAATCGGATAACAAAATTTCACCAAGAAGTTAGTTGCTTGTCAATCATTTCGCTactggatggcggcgttagtatc	TATCTCCCTTATAGTCTCTTGACAATAAAGGTTTGCCCTTGATGTCTAAAAAATGTATCTGTGATGCCATcgactatttatatttgtatg	GCCAACACATATACTTCCAACA	AGTACTGGGTCATGACTTCAACC
GELC0933	C4_00080C_A	AATCACAGTCACATTGGTAGGCATATAAATATGAGCTAATTGAAAGGTTTTTTATTTTTTTCACTCACCAactggatggcggcgttagtatc	TAGTAATATCCTTCAAAACCCTATCAAGAGACAGGGCAAGTTTGGTGGATTGCGTACTTGTAAACTTCATcgactatttatatttgtatg	CTATAAAGTAGTGGCCGTGGAT	TGTTCGTACAAAATCAATGCCCC
GELC0934	C5_00030W_A	TTTTGTTGTCTATTTTAGTTCGAAAAAAAAAGCCGGAAAAAAAAAATTTTCCTTCATCACCACCCCAACCactggatggcggcgttagtatc	TGGAGGTGACGGCAGTACGGATTGAGGTTCTATATGGGAGGATAGACCTGGCAGGGATATACTTGAACATcgactatttatatttgtatg	AATCGATGATATAGCCCGTTCT	TGTTCCTGACGCACGTATATGT
GELC0936	C5_00140C_A	ATCAAAGACGTTGTATGATTTTAAGAATCTTCTTCATCCGATTGGGTTGGCGTTGGAGACGATTGTGGCTactggatggcggcgttagtatc	GGATGTTGAAATTTTCCGGGTCAGGGGTTAGCAAATGCAACATAAATAAACGCAATGGCCAGTACACCATcgactatttatatttgtatg	AAGATGTCTAGAAGGGTCGTTG	CCCTTAACCCGTCATCTTCCAT
GELC0937	C1_14520W_A	GATATATCACTACCAACCCCAAGATGTCGAGTACTGTTACGACCCTGAACCACTAGCCATACCCTGTCAGactggatggcggcgttagtatc	CCTGTCTAGTACTCACCAACACAACCATACTCCCATCATCATTGAGCCCCACATGGYTGACCGGCCACATcgactatttatatttgtatg	GTACAAACTGAGGCTGACAAAT	ATCTGTATTGGTGGCGGAAAGT
GELC0939	C4_00280W_A	AAAAAAAAAAACAAATGTTACCCAGTTTGTTTCTTTTTTATCAACATCTATTCATTTTTGTTAAATAACTactggatggcggcgttagtatc	TTGTAAAAGTTAGTATATTGTTGGTCATTACATTGCAAACTTATATACATACTTCTGCTAAAGAAATCATcgactatttatatttgtatg	GCTGCTGAATCCAACTAAACAA	TTAGCACGGGAATACTCTTGGG
GELC0941	C3_07890W_A	AAAGACATGGTTAAAAAAAACAACAACAACAACAACAAAAAAAATTTTTCTCTTGCCTTCTTTATCAACCactggatggcggcgttagtatc	CAAACTGCATAATCTCTTTTCTAGAAGCCTCATCAAGGCTCTGAATAGCCGTGGTAGATAAACTTGACATcgactatttatatttgtatg	GTTGATCATGGATTGTAGCACC	AACGCCCTTGTAATGCTTCAAC
GELC0942	C5_05460C_A	GAAAAGAAAAAGAAAAAAATTTTTTTTTGTTGTGACACTTTTATAAATTACGCAAACACTACCCGCAAACactggatggcggcgttagtatc	TGGGCGAGTAGACTCTGGCTAGGCCCTGTGATAAGTCGTACACATATACTTGCACTGTGTCTTCAGTCATcgactatttatatttgtatg	ACGTCTCAAACAAATCAATGGT	TCGTCGTGGTTCTTTAGTTCGT
GELC0945	CR_10750C_A	ATAATGTACATAAATAACCATCTCATCGAAGAAAAAAAAATTTTCTACTCTTTAGTCTTCTCCAGTAAAGactggatggcggcgttagtatc	TCTGGGCATGCTGATCTAACTTCTTTTTAATAACGGTATCGTTACAAACTTCACAGGAGAATGAAACCATcgactatttatatttgtatg	TAGGCGAAGAGGAAATGCTAAA	TGGTTGTTTGGATGGTTTTGGG
GELC0946	CR_09330C_A	GATTTCCTTCATTTTCTTTCTAAATCATCATATTTTAATACGAAGCCTCCCCCCCTCCCCCATTCCATATactggatggcggcgttagtatc	TTTTTGATGGTGTTAAAACAACAGAGTCTCCACTCAAAACATTCTTAACTTTTGCTACAAACACTGACATcgactatttatatttgtatg	TAAAACGTACTGGTCGACTCAA	TGTCTCTTAATTTAACATAACCTTGAGCT
GELC0948	C5_00160W_A	TTTTTATTTTTCTCTTCATTTTTTTTTCTGGCAAATTTTTTTTCCTTCTACTTCTACACCATTGCCTCCAactggatggcggcgttagtatc	TAAAACTTCTTTTAGCTCTTGATCGGGAAAGGACAGAAAATGAACGACGATAAATGGTTGTGGAAAGCATcgactatttatatttgtatg	TGGCATAGTTTCTTCTTTTGGC	ACGCCAACACTCAAAGTCAATC
GELC0949	CR_10380C_A	TATTTGGCTATTTACTGAGTCCTCTACTTTTTTAGTTTTTGCAACAACACCCAATTGAAAACCACTTTCCactggatggcggcgttagtatc	TAGCTTTAGTTAACAGTTTTTGATTATGTGGCCTTTTGGAAATAGTTATTTTTGGTTGGGGTATTAACATcgactatttatatttgtatg	CAGATGAAGGATGTTTGTTGGG	CCTTGGTATGAATTGGGCTCCT
GELC0953	C7_00140C_A	TTCGTTGTTCAAAAGCTACACCTCTTTTTTTTTTCTTTTCTTTTTCTTGAAAAACACCCTACCATCAAACactggatggcggcgttagtatc	TATTATTTCTTCTTGCAGATTCCAATATTTGCTCTGAATATGAAGCCCCTTCAGTTGGAGTATCTGTCATcgactatttatatttgtatg	TGTTTTATGTGCGGTATGGTTG	GGTTTCTCCGTCTCTGTTTTGC
GELC0954	C7_00340C_A	TGGGAGTCTCCTTATGAGCACGTTTTTTTTTCCACTTCTTCCTTTCTCTACGGAATAACTGGCAACCACAactggatggcggcgttagtatc	GTTCTGCATTCTTTCTGATCTCATTATCTGAGCTAGTCTGGTTTAGAACCAAATCTATCAAGCTTGACATcgactatttatatttgtatg	TTCTTTAGAGGAGGTTGAGGAC	TGGCTCTTGATTTACTGGAGGG
GELC0955	CR_00060C_A	GGTATGTGTTGGAATATTTTTGTGTGTGTGGTAACCAAAAAAATTTAAAACAAGTGTTTCTGGATCGGGTactggatggcggcgttagtatc	TCATGATGAAGAGTAATGGTTGTTGTTGTTGTTTTTTTTTTTCAAACGCGACTTCTAAATCTCTAGCCATcgactatttatatttgtatg	GATAAACCGTAGCCAACAAGAC	GCACTTCTCTTTGTTTGGGTCG
GELC0956	CR_09190C_A	AGATTATACTTGATTGAGTCTCAAATAGCTTGTCAAATCATACAGTCAGTCACTAACAAATTAGTAGCAAactggatggcggcgttagtatc	GAAAATCAGGGATGCACAACATTCCTTCCCTTTCAAATGTACTTAACTGTTCTTTTGTAAGACCGACCATcgactatttatatttgtatg	AGGGAACGTTTGTATAGATTGGT	CCCATCTTTATCAAATGCGTCAGT
GELC0957	CR_09010C_A	CCTTTATCTCTTTTCCCTTTATCTCTTTTCCCTTTTCCCTTTTTCTTTCCCCACTGTAACCCTTTCAATAactggatggcggcgttagtatc	GGTTGATTACATCAATCACACGTTTAAGATGATCACCACCATGGATAGAGTCAGTTGCCAAGCGAGTCATcgactatttatatttgtatg	GTTGTTGAATATCCCGGATGTG	CCATTAAACGCACCCAATCCAG
GELC0958	C2_00880W_A	TAAAAAAACTTGTGAATCCTTTTTAAATTTAAACCAGGAACCGATACTTTTCTAAAACCAGTCAATCAACactggatggcggcgttagtatc	AATCGTGTACAAATTGTGAAGAGATGTTTCCTGCTCCTAAAATACCCCAATTGAGAGTGATAACTGTCATcgactatttatatttgtatg	TGCAAAGCCTCTGTATTACTGA	ACACCACATCTATATCCAGGTT
GELC0959	C2_00230W_A	TTGTCGCCCCTGGTATATCAATTAAAAAAAAAAAAATTCCAACTTCTTGATGTTCTACGTGCAGTAGACTactggatggcggcgttagtatc	CTTGTTTCTTTGAATCCTTACAATACCCACAGTCTCCATCTCCAAAATAACGTGGTGGTGTCACAATCATcgactatttatatttgtatg	CCCCTTGGAGAGATTCATATCC	TGTGTATAACCTGCAACAGCTT
GELC0961	C5_03640W_A	CGGAAGAAAAAAAATTGTTTTGGAAAAATTATTTAACCTCTCTTCTCAATTATCATTCACAAAACAAACAactggatggcggcgttagtatc	TAACTGTCTCCAATCCCCTAACTGTGATGTCCGATTCGTATGACAACCCTAACCCAATGAGGTACAACATcgactatttatatttgtatg	TCTTGCTTTTCTTTTCCCCTTC	GACCAAGTCTGTGTGTGTTGTG
GELC0962	C7_04220W_A	TCTTCCTAAATATTACTTTGACTTGGCATTCGATTGGAAGTTGTAAACTCTATCCTAATAATAAAGAAGAactggatggcggcgttagtatc	AAATACTAATTGCAAGATGCGTTAGTTGAGAATACCTATGCACGCAAAACCATGATATTGGGATTGACATcgactatttatatttgtatg	ACAATCAGGTGAAGTTTCCATTC	TGTTTGAAAGTGCAAGCCAACA
GELC0963	CR_10840C_A	TCCTAATTTTCGTCTATAAATACACCTTGCAATCCCCCCCCCCATTCATTCGTTTTTTATTTCCCCAACCactggatggcggcgttagtatc	TTTCTGGGGATTCGTAATCTTCAAACGAAATGTCGTCGATTTTGTTAAGCACTAAAGAAGGGTTTGTCATcgactatttatatttgtatg	CGAATTGGAAGTGTTAGATGCT	TTCAAGTTGGTTACGTCGTCAC
GELC0964	C4_06960W_A	TGAGAATTTGTATAAATGACTGAGGATTTGCTCAGCTTTCATTCCTATCTACTACTGCCCCATATTAAAAactggatggcggcgttagtatc	TGCTACTGCTGCTGCTATTACTGACATTACCATATACTTTTCTGTGATTGGCTTTGAGTATTTCAGACATcgactatttatatttgtatg	AGTGCTTGTCATAACTGTGAGT	CTGGTTTCCCGTTTCTTCGATG
GELC0965	C4_00050W_A	TAAATATATAAATTTTTTTGTTATGCGAACCTCGGTAGAAAAAATCGACAACTCTTTCTTTCTCTCCACAactggatggcggcgttagtatc	TTAACTTGAACGACGCCTCAAAGTTCTTATTAATGAATTGCTTTAAAGCAAGTTTGTAGTTGTGATCCATcgactatttatatttgtatg	CGGAAGAAGAAAACACACCAAT	GAATTGATTGCAGCGTTGGTCT
GELC0966	CR_04530W_A	TTTCTTGCTTAATTTTTTTTTCTTCTCTCCCTTCCTTTCCCCATTAGAGCTTCTTTAACTTAATTGAAACactggatggcggcgttagtatc	TTTGAGCACCCCAATATTTATCAGCCGGCACTGAGATTTCACCAAAAGCGTCAGATTCAATACGTGACATcgactatttatatttgtatg	TGAGTCTGCTTCCAAGTATTTG	TCAATTACCTCGGAAGCAGCTT
GELC0967	C4_06750C_A	AAACTCAATTGGAAACAAGAAAAGTAGCTTTTGCTAGCTTTAGCATTTTGCGCTAGTCTGGTTTGTAGCAactggatggcggcgttagtatc	GACTCAGTTCACGATTATTCTGCGTCGAGTAAAGTATTAGGTAAGCGCATGGTACAAATTCAAAAGACATcgactatttatatttgtatg	AGCAACAAAGGGGAGGTAATTA	CGGCCATAATTTTCCTGTTGCA
GELC0969	C1_14380C_A	TTTTCGATGAGAATTTTTTTTTTAGCCCAAAAGAAAAAGTGTGCTCCCATAACAACCACACAACTCCTCAactggatggcggcgttagtatc	ATTTGGAAACATTGTCGATCTGCCGTATAGATTTCCCTATTCTTGAAATCGTCTCCCTAATAGATAGCATcgactatttatatttgtatg	ACACTCTTTGCATCTGATGGTA	CCTGGGCACTATCGTACTCTTC
GELC0983	C3_00210C_A	TTATCTATAAAAGTAGAGCTGATTACCAAAAAAAAAAAAAAAAAAGTTTCCCACCACTTTTCCAATAACCactggatggcggcgttagtatc	TGGTGATCGACTTTGTTAATAACGGATACTTGATTAGATACGCCAAATACTGAGCATTCAACGACGACATcgactatttatatttgtatg	GAAAATACGACTGGTTGCAAGT	TGTAGTGACTAATTGGAGTGGCA
GELC0984	CR_10760C_A	ATCATCATGAGACAAAAACCAACACAGCAAAACCACAACTCCTCTTTATAACCCACCTTTCACCCAAGCAactggatggcggcgttagtatc	CTGCCAACGTTTTGTCGTAAGCTTCCTGCTCTTTTTTTCCACGAAACACACGGTTACCACTGTATGACATcgactatttatatttgtatg	TCCACGCCACAATAGTAGATTT	TAGCATTTCCTCTTCGCCTAGC
GELC0985	C7_04240C_A	ATGGTGCGATTCAAAATTATGAAAAAAAAACACCTGTACTTGCATACTCCTACGTTTAACCACTGACAACactggatggcggcgttagtatc	TGAGTGCTTGTTGCGGTAGATATTTGATTATCGACTTCTTAATAGGTACAGGCAAGTCAATCAAATTCATcgactatttatatttgtatg	TGAGCTAACTATGTGACAGGTG	CAATTCCTTGCTCACCACCTTG
GELC0987	C2_00050C_A	AAAAAAAAAAGGGACACCCAACTATAAATAGTGGAGGGATTGTCGCCTCTCGTTTTTTTTTTGATCAGCAactggatggcggcgttagtatc	AAAACCGAATCGGAGCACTAGCCAAACCACTGACAAGCACAATAGTATAGAATAAAACTAAGCAAATCATcgactatttatatttgtatg	GTGGCGTCGAATACTATACTGA	CTTCCCAACCTTGCAGTAAACC
GELC0988	C1_09330W_A	CTTTTGCAAAGAATCCTGAAAAACAAACACCAACCATTGTATTAGTATCATTGCAAAGCTTTAATTCACCactggatggcggcgttagtatc	TGATATGAAGGGATCCAGTTGATTTGGATATATTTTTCGTTACTTTATTTAAATTATGAGCTAACGGCATcgactatttatatttgtatg	TCAGACTACCCTCAAAACAACT	TTCTTCATCTTCATCACCGCCA
GELC0990	C1_01080W_A	ACAAACAACAACATACATCAATCTCTCTCTTTGTTTATATTTTCCCCCAATGGTTCAGCGATAATTGAACactggatggcggcgttagtatc	TGTTCTCTTCGTGCTTTAATCTGGCAATGTACTTGTGACATAGTGATACAGTTAAAATATCTGGTTTCATcgactatttatatttgtatg	GGTATTCAAAGTTGTGGGTCTT	AGGTTCGGTATCTTCCTTTCGG
GELC0991	C6_01670W_A	AACAACACGTTTTCTAACATAGATATTCACATTAACTACACATATACATACCCAGCTCAACATCAACACAactggatggcggcgttagtatc	CTGCTACTGCTGCTGCTGAGGCGGCTGTGCTTGAATTAAATCGGATCTGGAGTCTGGCAACCTTTAACATcgactatttatatttgtatg	CAACAACAACACCACCAGTAAA	ACTTGTGAAGGTAAAAGTCCAGT
GELC0993	C4_00180W_A	TTTTTTTTTTTTTTCGATTGGCTCTCACTCCTTTTTCTTCACACATACAAAACCTGCCTCTACCAACGAGactggatggcggcgttagtatc	TTCTGTCCTCCTTGTTGAGGTTTTTAAACGGTAGGGTAATGTTATACACCAAGTTTCTCCATAATAACATcgactatttatatttgtatg	CCTTTACAAACCTTGCCAGAAA	CCTGTTCCACTCATCTGATCGT
GELC0994	CR_02030C_A	ATGCGGCTTTTCAATTAATTTTTGGTCTTGACATTCCTTTTTTTTTGGTGGTAGGGTTCATTTGAAGGTGactggatggcggcgttagtatc	GGCCAAAGAATATGATTGGATATTTTTTTTTGTATGTGTTTTTTTTTTCAGTTCGGTCTTTGATGATCATcgactatttatatttgtatg	TGAGACTACAAAACCGCAATTT	AGACCAAGGCAAATATGTGTTT
GELC0995	C1_06980C_A	TAAACTGAAGGATCTACCACTACAAGAAGTTGTTGAAAATAGTTAAACAAATTAACACACACTCATCAAGactggatggcggcgttagtatc	TATCAGGCTGTTGAAGTTCGATGGAATCCGTGGTCTCTTCCGATGATAGGTTTTTTTTCGTTTTTATCATcgactatttatatttgtatg	AATGCACCTTATTACCGCTAGA	TCCTTTGAATGTGCCCTGTGAT
GELC0996	C6_04440C_A	ACTTTAGGCGTAGAAGTAGATTTCGCGAGTAGTCTTGTAGTATGTGAAAGATATCGAATGGTCTTCATTGactggatggcggcgttagtatc	CATGCGACTGTGTGTTGATATAAACCCACAAAAAAAAAACAACAACAAAAAATGAAAATTTTCTTTTCATcgactatttatatttgtatg	CGACAGGTAAAGTTTCGCATAG	CCCGTTCGTTTGTATCTTTTCGT
GELC0998	C2_10620W_A	AAAAAAAAATTTGGTGAAAAAAAAAAATTATCTACCACTCCTATACCATCATCATCAACAATAAACCACAactggatggcggcgttagtatc	ACAATTTGTCCAACATCCAGTGAGATGGAGCTGCTAATCTTTTCAAGTGTTTCTTTGGACCTCTACCCATcgactatttatatttgtatg	CAGGAAGTAGAAAAGTCGGCTA	GCTGGGTAGGTGGTATCAGTTC
GELC1001	C2_09690C_A	CCAAACAACAAAATCAGAAGACTTCACCCCTCATACAAGTTGAACAATCAATTTATAGATATATACATTGactggatggcggcgttagtatc	TGGATGACCTTTTCGTAGAGTGGTGAGCCAGCGCACCACGATTATGATTGCTCAGACCTCTTTCAGCCATcgactatttatatttgtatg	AATACAACCCTGCAAAGTTTGT	TTTGATCTCCTTACGCAAATCA
GELC1002	C1_14370W_A	GCAACTAACCAAAAAAAGAGCGAGAAAACTGGTATATTGGAATCTGTGTAGTTTAAGGAAAAAATAAGTGactggatggcggcgttagtatc	GGCTATTTTGATAAATCATACTCATATATATACACTTCGACTTCCCCTTTCTCCTATTCCCCCGTAACATcgactatttatatttgtatg	AAATTTCAGAAACCTCTCGCTG	AACTCCAACAAAGGGCCCTAAA
GELC1003	C1_14180W_A	GATATAAATTAGAACAATAATCAATACTAAAGTATTTGTGGAGAGTGGAAATTGTGTTACATACTTGAAGactggatggcggcgttagtatc	GGTGATTCCTGAATTGGTTTGTGTGTGGCTGTATAGTTGTCGGAGTTTGCTGTATGTTTTTGTATAGCATcgactatttatatttgtatg	TTTAGTAGTTTAGCGGGTGGTT	AGCTGTTCTGTTCCTGTCCTTT
GELC1005	CR_08710W_A	ATAGGCTGTTTTTTTTTTTCTTTAAGTCAAGCAAGTGTAAACAACAACAAGCCTGTTAGGTAATCCAATCactggatggcggcgttagtatc	ACTCAATTCCAAATGCCGGTGCACGTTTTTTCGTAGATGGGGATTTCGGAAATGTAACTGTAATAGACATcgactatttatatttgtatg	GCATCCAAACCAACCATCAATA	AGCACATTTGACCAACTTGACA
GELC1006	C6_02610C_A	TCAAATTTTTTTAGCTTTCCCACTTGATTTCTTCTTGTATTGGCTACCTAAATTGTAATTAAGATCAATCactggatggcggcgttagtatc	TTGGATGAACTTCCACATCAGAATCATCAGAAATTTCTATCTTATCCCACTTGGAGTAATCTATTGGCATcgactatttatatttgtatg	TGTATTTATTTCTTTAGTTCACCCC	AATTCAGTGGATGTTAACTTTTCC
GELC1008	C3_04710W_A	ACGAAAAAAAAAATTACCCTGAAGAGCTTACACAATCACTACCTATCATCATCATCACCATCCATTTTCAactggatggcggcgttagtatc	TGATATAATCACTTTTATACTTGGAATATAAACAATCAATATTAGAATATCCACATTCTATACAGATCATcgactatttatatttgtatg	CACAAACTCAAACTACCAGGAG	AGTTGATGATCCTATTTCCATTTCCA
GELC1011	C3_05200W_A	AAAAAAAATACACCAAAACTCTTTTGTTTCTTCTCTTCTTCTTCACCACTTAATATAGCCAATAGACATAactggatggcggcgttagtatc	TCCCATTATTCATACCGTTTCAATTGCAATAGACACAGTGAATCACATACCTAACTGATACACCTGGCATcgactatttatatttgtatg	GGTGGTTGTTTTCTGCTTCTAT	GGCTGCTTATGGAATGGGTACA
GELC1012	C2_00320W_A	AGTGTGTGTGAAAAGAGAGCTTTCGAAAAATAAAAAAAACACATACCACCAGAGACGAGTTCTACCAATAactggatggcggcgttagtatc	ATTGTTTTGCTACAAGCACAAGAAATATTGATAATAATATAGTATATGGATGTAAATCAGGTAAAAGCATcgactatttatatttgtatg	TCCGTTCTTGTTTTATCAATGGAG	ATTTTGCATACTCGTCTTGGGC
GELC1016	C3_06570C_A	CTGTTAAACCTTGTTTTCTCTTTCTTCAATCAATTGAATAATAGATACTTATACATTCATTACTCCTGTCactggatggcggcgttagtatc	GTGGGAAATTTTGTGCCAAGTATATTAAATCACTTGGTAATGTTGACAATTCTTGAGCAATTGATGACATcgactatttatatttgtatg	CAGACGATTGTTATAAGCTTCGA	ACATAACAACCCAATTTAGCTGA
GELC1017	C3_04890W_A	ATAGTTTTATTTATTTATTTATTTATTAATTCAAATATATTTCACTAATTAACACATACAATAAAAACATactggatggcggcgttagtatc	AATTGTCCAGTGCATCCACCCATGGCTTTTCGTCTAGCTGTTGCGACAAAGACGTGTTTGCAGTACTCATcgactatttatatttgtatg	TCAAACACAAACAATAAGGCTGT	ACTAACACCAGGTATGTCGGAC
GELC1018	C3_05210C_A	CGAAGGCTTTCAAAAATAGTGATCCAGAATATTAAAAACAGAATCTTTATTTGAAATTTAATTCAACACAactggatggcggcgttagtatc	AAGGTAGAAAGCCTATTATACAGTCATATAATTGATTGACTGATAATAAGGGTGTGACCAGTTCTTCCATcgactatttatatttgtatg	TCTTCAAACACCGCCAAATAAG	GCTGTTGGGTAAGCGGTATATC
GELC1019	C6_00980C_A	CCAACAATTCAAATTCCATACTTTCATGTTTCATTGTCCACAGACTTCTTGAAGTGAAAACCTTTAGCAAactggatggcggcgttagtatc	TGATGGGATGAGCGCTTATTAGATGCAAAATTTGGGAAACAAATAACGATAAGACCAACCCTAAATACATcgactatttatatttgtatg	GCAAACATTTTCAGATATTGGTCC	AATGTACCCTGTAACCGAGTCG
GELC1020	C1_10560C_A	CGTCACAATTGTTTTGTTTTGAAAAATACTTTCACCTAGTGAGTCTTTAATTACCATTTAAATAACTTTCactggatggcggcgttagtatc	TAACTTCTGGTGGTAACTTCCCCAAATCACTGAAAAAATCAACATTGGTATAAGAACTTGTGCTTGTCATcgactatttatatttgtatg	AGGCATTTATAGCTGAATCCCA	ACACGTCGCATTTACATCTGGA
GELC1022	C6_00990W_A	AACACTTGAAAAAACTGCGGATATCAACTACACCCCCCAATCGGCACTAAATGAAATCCAGATCCATGCGactggatggcggcgttagtatc	TTACTGGTAGTAGCTGTATTACCCAGCACACAATTAACAATATTAATAATGCTATAAATGCTTTGAACATcgactatttatatttgtatg	AAAACCACTCAGATAAAGCCTT	TGGCAAGACAATACCACCAGTT
GELC1023	CR_05310W_A	ATATTGAACAACAACTGTACAATTTTGGTGTGGAATCCCTTACATCAATTCCTACTAAGAATCAACAGTCactggatggcggcgttagtatc	TCGTTTGATACCATTTTGATAATCTGGTTTTACCTTGTCGAGATATGAGAAATAAAAATTGAATGGCCATcgactatttatatttgtatg	TGTTGTGGCTTAGATACCCAAT	ATCATCAGAATTCACCCCAATGAC
GELC1024	C1_03790C_A	CTTTCCTTCGTTCTTTCCTTCGTTCTTTCTTTCTTATTTCAACAATTCTCCATTAAGAACAAATTTAATTactggatggcggcgttagtatc	CAATGGCAGGAACTGGTTGAAATGGTTGTAAAGCCAAATTATAAGTAGCAATTGGAGTTAAATTAGACATcgactatttatatttgtatg	GTGTGCAAAGTGTATGAGAGAG	CGTCCAATTCATCTTCTTCGTCA
GELC1025	C1_03750W_A	TCAACCATCATTTACAACTCTTTACAAGGAATAATTATTAGAATAGTATCTACCTACCGGGGCAACTTTCactggatggcggcgttagtatc	TTAAAAATAAAATGCCTCCAAGTATACGTAATATATCTAGGAAAGAAAATTTCGTTCTTGAATCTCTCATcgactatttatatttgtatg	TGCATTCATAGTAAGGTTGTTGT	TGGGTAAATGTTTATCAGTCCC
GELC1029	C1_04200C_A	TTATTATTATTATTATTTAATATATCAATTTCCCTTATAACTTCAATTATTTGAATTTAATTTTCACATTactggatggcggcgttagtatc	CTTGATCAAATTTAATTGCTGGTGCAGCAGCAGCAGAATCACCACCACCAGCTTTCTTTTCTTCAGCCATcgactatttatatttgtatg	AGGGAGAAACAACAACAACAAC	ACCATACAAATCCAACATCAGGT
GELC1030	C1_04220C_A	ACATGATAAATCGATTTATTGTTTGACACTAGCTAACCACATTTAAAAAATATTGACTTACCAAAAAAGCactggatggcggcgttagtatc	GATTTCTCGTTCGTAATATTGTGGCTATTTCTAATACAATTTGTGCTATATCTTCAGGTGGGAATGCCATcgactatttatatttgtatg	ACGCCACTAAGATGAACAAAAC	AGCTACTTGTTCACTTGGACCC
GELC1031	C1_04250C_A	AAGAGAAGAGAGAGAGACCAAAAAGTGGCGTATAATTCTCGTTCTCAGATTTACAACAAGCAGAATAAAAactggatggcggcgttagtatc	CCTGTCTTTTTGGTTCCATTTCGCACCAGGCACAAACAAAACAATACACTTTTTCTTTTTTTGGTGTCATcgactatttatatttgtatg	TTCTAGCCATTGTTGTGTGTTG	AGGGGAGTAAAGGAAGAAGAGT
GELC1032	C6_04230W_A	TATTCATAAATACAGTTTTGAAAAACAAACCAATCAATTATTATCCAACAACAAGGGGAGGGCCAATAAAactggatggcggcgttagtatc	TGTAATGATAAACGCATTGAATAAATACTAATGCAAGTTCAAAATATTCTTGAATAGCTAAATTATTCATcgactatttatatttgtatg	ACATACTTATTGGTGGGTGGAA	ATGGCAATGGTTCGTTCAGAGT
GELC1033	C6_04260C_A	GTACTATTTTTTTTTTCTTTCAATCCCACTTCATTTTCTTGTTTAGTTTGATTCAATCCCAATTCCCATCactggatggcggcgttagtatc	AATCATCAATAGCAAAATCAGCTAATTCATCGTCTTTAGAGGTTACTTTCGCCGTAAAGTAGTACACCATcgactatttatatttgtatg	ACGAGGGATATGTTTCAGTGAT	CGAAAGCTTGTCAACATGAAACC
GELC1036	C6_04370W_A	GAAGTTTTCTTTCTTCTTCATATATAAGATTGTTTATATAACTCAATACTAGACAAACTGTAGAGTAAATactggatggcggcgttagtatc	ACGATGTTGTGGAGGAAGAAGAAGTAGTAGTAGTAGTAGCCGTATTTGCACCTCTATCAAGGCCACTCATcgactatttatatttgtatg	ACGAACTACCCAAGAATGACAT	TCGTATTGAGAATGATGGGAAGT
GELC1037	CR_07140C_A	AATGATTCAAACTTTGTTTGCTTTCATCCTTTCTTCTTTACTTATAAACCACTTGGTAAAAATCAAATAAactggatggcggcgttagtatc	AGCCATACTCATATGGTGATGAGCCATATCCACTACGATAACCACCATAGCCTCTTGATCTTCCATACATcgactatttatatttgtatg	CACTGATCACTCGTGGTAAGT	AGATGGAGTGGTTGGCTTGTAG
GELC1038	C5_03870C_A	ACTTTTTTTTTTAATCACCACTTTTTTCCCATAACATATATATCTTGATATATCTATATATCCCCTTATCactggatggcggcgttagtatc	TATTTTCTGATGTTTTGTTTTTATTGGAATGTATGTTACCAGCACCTCCTCTACCTGTAGAATATGCCATcgactatttatatttgtatg	TCGTGTGGTGTTTGTTAATTGT	GCCAGTGGAAACTTTAGCTGTG
GELC1039	C5_03860W_A	AGAATTTAAAACTCCAATCTACTCATCTTCTTCTCCTCATGTCTATTGAATTAATTTCCATTCTTCAATCactggatggcggcgttagtatc	AAGAAGCTAAAATTGCAATGACTTCTTTCAATTTATTAGCATTACCAGTGACAAAAGTAATTGTAGACATcgactatttatatttgtatg	TCAGATGTTGATGAAAGTAAGGT	GGTCCATCAATGACTTTAGCAGC
GELC1040	C5_03810C_A	GCATAGAAAGTTTCTAAAATTGTCATATATATAAGCACCTATTCAACTACAGCAAACACCATTATCCATCactggatggcggcgttagtatc	ATGGAATTGTTCGTTTTTGTTTATGATCAATATGACTTTGAAACATTGATAATCTTTGGTTAGCATACATcgactatttatatttgtatg	TGCCAAATCCAACAGAAGAAAA	GTTGGTCTTGTTGGTGTACAGC
GELC1043	C5_03740W_A	TTTCCTGAAATTTATTTTTTTTTTGATACATTTGATTCATCTCCCTTTTCTATAATCAATTTCATTAATCactggatggcggcgttagtatc	GGGAAGATACAGTTAAAACATTTGGTGAAATCTTTTTAGTGACCACTTTCAATGGTGATGGATAACCCATcgactatttatatttgtatg	AGATCTCTCAGTACGATGTGC	TCAGTAGTTAATTCGGCAATGG
GELC1054	C1_11620W_A	ACTTTTGTGATTTCAAAATGCCCTCTTTAAAAAATATACGTATTACCCCTGCAAGTGTAATTGCGCCCAAactggatggcggcgttagtatc	CAAAACAAAAGACTAAAAAAAAAGGAACAGAAAACCAAACCCCACCCCAAGTCACGTGAACTAAGCTCATcgactatttatatttgtatg	GTAGGGGTTTGTAGGATTTCGA	TGTACTGGTTATACTGTTTGAGCA
GELC1055	C1_11580W_A	ACAATTTATAATTCCTCATACCGTGTTGAGAAGTTTGAAATTATATCTAGTCTTGCGATACATTTAGAACactggatggcggcgttagtatc	TCTCATTACCATAGTATGTGTGCACATCATATGACTTGATGCCACCGTAAAATTCGTGATCTTCTCCCATcgactatttatatttgtatg	ACAGACCAGAACTCCCTAGATA	CGGTCCGTGGATGAATTAAAACA
GELC1056	C1_11560C_A	AAATCCAAAACCAGAAAAATAATCCTTTATCCATCGAGCTCTATATAATCAGAAGTACTTCATAAAATCAactggatggcggcgttagtatc	TTAGTAAATAGTCTATAGAGTTCCACCTTTTCTGTACAAAAAAATGTAGATGTAAATTTGACCTGTTCATcgactatttatatttgtatg	AAGTGAGAGGACAAATACTGGG	TCAACTCTTGCATTTCCGAAAA
GELC1057	C1_11510C_A	CTTCGTGAATGCGCTTATCTTGATTTATTGAATTTCCTTTAACTTCACTTGATACCCACTCAACCCCCTTactggatggcggcgttagtatc	AATGGGCTTTGCTTATTGCTGGATTGCTGTTTATTGTTACAGCAATTCGTTTTTGTAAAAGTGATAACATcgactatttatatttgtatg	CAACAACCAGTGCTCCTTTTAA	CGGACTTTGGCCATTCATGAAG
GELC1061	C6_00300C_A	CAGTCTTTCACAATTCACGCATATCGATGCAAATATACAACTAGAACAATTATACATATACAATAAAGTCactggatggcggcgttagtatc	GGAATATCGCCTCATTTGATTCGTTGTTTGAGGATAACACGCTATTTTCGGAAAGTCTTATAGGAGACATcgactatttatatttgtatg	ACACACCTAATCCGATTGTTCT	GTCCAATTGAGAAACCAACCCA
GELC1063	C6_00380C_A	TCCTGTACACAACATAGAAACATTCCCATCACACGATGGCTATATCTTTCTAGAGATAAACCTTAACCAAactggatggcggcgttagtatc	CGTCATTCTCATTATCGTCGTCCTGGTCTATTAATGTTGTGAAACTATCTCTGCTGACGGACCTCAACATcgactatttatatttgtatg	GGTAGTTGTCTTCGGTGAATTG	TCGTTAGGATGGGTGGTTTGTT
GELC1064	C6_00390W_A	GACGGACCTCAACATTTGGTTAAGGTTTATCTCTAGAAAGATATAGCCATCGTGTGATGGGAATGTTTCTactggatggcggcgttagtatc	AGGTCATTTTCTTTCGTGCACTCACAGTAGAGAATTGAACAAGAATTATTCTGTTTCCTGTACACAACATcgactatttatatttgtatg	ACCCCTGTATGCAAATAACTCA	TGTGGTAGTTGTCTTCGGTGAA
GELC1067	C6_01160W_A	TATATCTTTAATCTAATCCAATATATATTGTATTTACCACCATAAAGACACATCTTTTATATACTAAACAactggatggcggcgttagtatc	GTTCAGGGTTAGATAATAATGAATCATCAATATTGGTAATGATTAATGTGTTTGTTGGTTTCCTTGGCATcgactatttatatttgtatg	TTAAACCAAAGCATAGCCAACA	CGCCACCTCCTATAGTTGTTGT
GELC1068	C1_07710C_A	ATAATAATAATAATAATAATAATAATAATAACTTATCATCTTCCCTCCCATTTAACATCTCTTTTATAAAactggatggcggcgttagtatc	CTCCTTCAAATAATTCAGGGGCAACATTTAAATTTTGTTCTGCTAATACAATACCTAATATTCCACACATcgactatttatatttgtatg	TCTTCTTCCTTTTCCTTTTCCT	TTCACTTCCAGCACTTGATCCA
GELC1069	C4_05560C_A	ATTTTCTTCTTCTTCTTCTTCTTTTTTCACACTTTTCACTTTACTTAGGAAACTTTGTTACACCAAGGATactggatggcggcgttagtatc	GAGCATTTGTAAAATGTACCGAAGTTCTTCCAGCAGCTCGCTTAGAAATTAAATGAGTAGGATCAGACATcgactatttatatttgtatg	CTTTTGTGGTTGTGGAGTCAAA	GGCGGAGTTTTGGTTTGATGAC
GELC1070	C4_05590W_A	ATTTCCACATATTTGTAACATTTTCCTATAACAATTGATATATAACGGCAAATTCAAAGTTAGAAATACAactggatggcggcgttagtatc	AATTTATCAAAAAAAGCACAATTAGGTATATTGTGATACTGATTGTTAAGATCCAATAAATATTAAACATcgactatttatatttgtatg	GCAATCCAAACTCCCTTTCTTT	CAATTTCAGTGCCGATGATCCC
GELC1073	C4_05750C_A	TACAAAGTCAAACTTTCTCATCCAATATTGTTTCCAATTTTGACACCGCTGTTTATATATAAATAACTTGactggatggcggcgttagtatc	ACAAAGTCAACTTCCCTTCTGGATTCAATATTTCCGGTGCTTCATTTATCACCTGGGCTGTTAATCTCATcgactatttatatttgtatg	TTCCTTGGTTTCTTCCTCATCT	GGGGAAACTCTCATCATCGATA
GELC1074	C4_05770C_A	TATTTTTTTGCAACTTATCTACTGTTTACCGTGGGTCGCTTCCAACATATAATCAAACCCCTCGCAAACAactggatggcggcgttagtatc	ATCTTTTCGGTGTTCTTGCATCGATTAATACTACCGCAAACAAAAATACTATCAATTGTTGAATCTTCATcgactatttatatttgtatg	TACTATGGCCCTAATTGATCCA	TGTGTTGTTATTGAAACCTCGGAC
GELC1076	C4_05890W_A	ACATAGCAACAAAACTTTCAACGATATCCTAACCAATTCTATATAAAGTTACTTTTCCTATAATATCAAAactggatggcggcgttagtatc	TTCGGGGATATTTATTGATATTGAGATTAATAGATGACAGAGGAGTTGATGATTGGGTTGGATCTGACATcgactatttatatttgtatg	CACGTGAATGTAGTTACTTGCA	TGATTTGAAAGACTCCTGGGAA
GELC1077	C5_04040C_A	ATAGTTATTTTGTGTTATTACTGTTGGTAATAGTTGACAATTCTCAAGGGAAATACGCAGACCATGTCCGactggatggcggcgttagtatc	TATTTTGTGTCTGATGAAAACTAAGCCCATGTTTTTCTTGTCCTTCTTCTTCTTCTCTAGTATCTTGCATcgactatttatatttgtatg	AACAACAAAAGAACCGTTTAGC	GGAATGAAGGAATGACAGCACC
GELC1078	C4_03780C_A	TTTTTTCATTCATTCATTCATTCATCCATCCACCTATAGATTATCATTGAAAGTCATTAAACAACTAACAactggatggcggcgttagtatc	TTGGTAGGATTACCAGTTTTGGAACTGTCAATCTATAAGTGTTCCGTAATATCATTCGTTGTCCCAACATcgactatttatatttgtatg	AGGAAGGAAGGAAGGAGATTTG	ACTAAAGAAACAACAAACGCACA
GELC1081	C4_03710C_A	TTTATCTAAAAGCTAAACAACAATAGAAATCTAATCTCCCGCATACACTGGAAATCAAGAAATTTTATTTactggatggcggcgttagtatc	TTGTTGTGATTCTAGGGGAGAGTCTGTCAAATCTAGGAGATCTGATCAGAAGTAAAGGTGTGTTGGGCATcgactatttatatttgtatg	TCTAACAGCAACAACAACAACA	GTGATCACTGCAAATAACCAAGGT
GELC1082	C6_01200W_A	TGGCTTTGTTTATGAAGATTGTTACCAACTAATCTTCTTACAATTAAAGGCACATATAGATTGAAAAGAAactggatggcggcgttagtatc	CAGATTCTGATGATATCGGCAATGCCTGTTTTTGAGCATATACAAATTCCTCTTCATCTTCATTAATCATcgactatttatatttgtatg	CTGATGGTGCCAATAGTGATAA	GGGTTGATTGGGATTGAGTGTTG
GELC1083	C4_03590C_A	CAATAACTTCCCACTCAATCCCATTATTTCTTTCCCTTGACAGTTGAACTTTCCCATACCAACTTGAAATactggatggcggcgttagtatc	TAATTGAATTATCTGGAGCATTAATCCATTTAATAAGGAAATCTTTGGAATGAACTTCTAAAGTTTCCATcgactatttatatttgtatg	AAGTTCCTTTCACAAGCCAAAA	AGACCTTGTTCTTTGTGGTGGT
GELC1084	C4_03560W_A	CAAAGAAAAGAATATTTTTACTTTTGAGACTGAACTTTTAATACACTTTCCAACAGTAATCCCTCAAACTactggatggcggcgttagtatc	CAGCGGTCTCTATTGTAAACTCTTTCGCAGAGTCTATCATAGACGTTATTCTCGAGAATGAGTCGCTCATcgactatttatatttgtatg	AAAAGGTTAAAGACAGCTGCAA	TCACGGTCAGTTCTCGAATTCA
GELC1085	C4_03530W_A	CTTTTTTTATGAGCTTACAAAGCTCCCCTCTGAGGTTATTGCTTTAATTCTTGGGTTACTACCAAAATGTactggatggcggcgttagtatc	TTACATTTGAAAAAATTGTTGATATAACGATCTCTTTAATTGGCGGGAAATACAATAATTCTGGTAACATcgactatttatatttgtatg	TATTTGGGCTTTCAGTTAACCA	AGTTCAACGAAGGTATCCGGTT
GELC1098	C1_03220C_A	TACATCTCAAGTTACAGTCAAAAACATCTAAATACCAGTATTACTCATCAAAAAAAGAACAAAAATTATAactggatggcggcgttagtatc	TTTCTTCATAACGTTCTGCTTGTTCGGCTAATTTAGCAAGGTAAACGGAATCTTCACGGGAGGCTGGCATcgactatttatatttgtatg	TCAATTGCAAGTATGTGGGATC	CTTGGCTCTCATTTCCTTTGGC
GELC1181	C1_03950C_A	TCAACCCACTAATAAGAACAATTATTGTACAACTATCATCATTCTAACACCATATTACCCATCCTGGACCactggatggcggcgttagtatc	ATTCTGATAAATAATTATATTTATTGGTCTCTAGTAAGAGGTTTGGTATATCTTCTATCGTTATTGACATcgactatttatatttgtatg	TCCGGTTAAGGTTGTTTAGGTT	TGTTGTTGATGAATGGTTAGGT
GELC1193	C1_06460C_A	AAAAAATATCAATCGATTTTTCACAATACTTCCTTTTCACGGTTTCTTTTTATCAACAGACAATTCAACCactggatggcggcgttagtatc	GTCTTTTACCAGTTTTTTCAGCATTGTTGATGGCGTTTAAAGCATCAGCTAAGACGGAGGTTCTAGTCATcgactatttatatttgtatg	AGGAGTGAGATTTTGTTAGTGGA	TGTCAGTCCATCTTTCAATGTCG
GELC1324	C3_02320W_A	TTTCTTTTTGTTTTACTTCTTCTTCTTCTTCTTTCTTCTTTACAGATTCAAACTATTAATTCAAACAAATactggatggcggcgttagtatc	TAATTTGTGATCTTAAAATGGAACCATAAAAGGTTTTCGTTGATGAAGTTCTCAAATTACGAGAAATCATcgactatttatatttgtatg	CCCGAAATTGACTCACACAAAT	TCACCACCAGTTAATCCAATGA
GELC1425	C2_06600W_A	TTCACATTCAAGTTATCCTCCTCAGATGGAAGATTTTTCTACTGAAGTGATATCACTTGCTAATAGTGAAactggatggcggcgttagtatc	CTTGCAACTGTGGTGGTGTACTGGGTGTTGTTGCTGCTGCTGCTGCTTGATATCTACTTTCAATAGTCATcgactatttatatttgtatg	ACTCCTACTCCTATTCCTATTCCT	TGGAGATGTAGGTGAAGGTTGAC
GELC1467	C2_04290W_A	AGGTCAATCAAGAATAAAAGAAAGAAAGAAAGAAAGAAAGAAAAAATTTTGTCCAATTACTAACAAAAATactggatggcggcgttagtatc	GGATGGTTTCTGACGCACCTGAGTGGCCATTGGTGACATTCTCCGTTACAAGTTCTATTTTGGCAGACATcgactatttatatttgtatg	GTCCACACTCCCTTTGTTTAAA	TCAGCTATATTTCTGTGATGAACCA
GELC1468	C4_02160C_A	ATTTATTTATTTATTAGAAAATATTGCTGTTTAGAATTTAAGTAACAATCCACATTGTTTATTACTGATAactggatggcggcgttagtatc	ATACATTTCTGATTGTCGATTTGGAAACAAATGGAAGTGTTCGTATTGATGGCTTTAGTATTCGAAACATcgactatttatatttgtatg	TCAACCATTGCTCATACTTCCT	TGAAGTCTTTGATGGTGTTAACGT
GELC1470	C1_00940W_A	GAGAGGAAACTACCATACTTCATTCTAAAACCCTACATCACCAAAATACTATAAATACACATTTCCAATAactggatggcggcgttagtatc	GACATATATATACTTACTTATCCACGCCATCTGGCAATATGAAAAGTTCGAATCTATCTGGAGCATTCATcgactatttatatttgtatg	TTCTTTTCTCTCTGTGGTGGG	GCTCAACTTTATAGGCAGCAAA
GELC1474	C1_03030W_A	CATTTTTTTCAGAACAGGAAAATTTTTGAAATCTAACATCTTTTACTGAAAGCCAAGCATCAACACAATAactggatggcggcgttagtatc	TTGATAATAAAACATCTCTCTATCTCTTTATTTCAATTCGTTTACATACTTGAACAGATTGGGTTGACATcgactatttatatttgtatg	CCCTCCACTGTCTGTAATACAA	GATATTCTATTGGCCCAGTGAGC
GELC1475	C1_03110W_A	GCTTTTTTGCAAAATTTATTCTTGCCGGATTTTCATTCAATAATACACCAACAATAATATAGAGTCAACAactggatggcggcgttagtatc	CTGTATCAATCAGTTCTATCCATCTCGTCCTTTCTATCTATCCTGCTATCTCACATACGACTTGACTCATcgactatttatatttgtatg	TAGCCCTAAAGATATGTGCAGG	TGTGTAGAGAACTGATCCAAGT
GELC1477	C1_04610W_A	CTTTTTCCCTTTCTTCTTCACAACTTCTATTTATATCCCTCCACCAATAAAAAGAAGAAATTATAGAAAAactggatggcggcgttagtatc	TTAAAGATGATCTGGCAGCAATAGTAGCTGTACGAGCAGCAGTACGTAAAACAGGACGAGCTGACAACATcgactatttatatttgtatg	GTGATACACCTCTGTCAATTGC	GCACAGTAGTTTCCTTCAATTCCA
GELC1479	C1_05720W_A	GAAACGAACAAAAATTTTTCACTTGACCTTGTTCTCTTTTCCTCTAGTAATCAACCAACAAGTTCCAAAAactggatggcggcgttagtatc	GCAATCCCATTGAACTTGGTGTTCGTTTTGGTTACTAGACAATATGGAAGTCGATGACATACGTAGCCATcgactatttatatttgtatg	GTCACCGATTTAACAACAAGCT	AGCGGTTTGACAATGACAATACC
GELC1481	C1_06470W_A	AAAAAAAATTTCAAGCAAAAATTTTTTCCATCTAGATTTTCTTTCTTCAGAATATCAAGTAACTTTAAAGactggatggcggcgttagtatc	TTATTATAATAATCACCCAATAAAAGACTGAAAGACATCATTATAACACTGTTATTGTACATACAGGCATcgactatttatatttgtatg	TTTCCTCCTTCCTCACTGTAAC	GGTCTGTTTTGCTTTTGAGCCT
GELC1486	C1_10100C_A	TTTTGTCTTCCAATATCCAGTGACTTAATCTCATCAACCTTTAACTTTATCAATCAATTCATTTTCTATCactggatggcggcgttagtatc	TAACAGTTACAACTCGGTGAACTGACAATGCTAAGATAACATCATATATATTGATTCACATACCAGACATcgactatttatatttgtatg	ACTATTTGTTTCCTTGGTTGCA	CTCCTTGCAATTGAGAAGTTTCA
GELC1487	C1_10390C_A	TTTTTCTTTGAAAAAAAATTTACATACATATCTTAGTTCACTAGTAACTTTCGAAGACAACATAGACAAGactggatggcggcgttagtatc	TTAATCTCTTTGTATTGGAGGAATATCTTGTATCTCATTGTTGAATATTGCTATACTGGAACATACCCATcgactatttatatttgtatg	GGAATTTCTTGGTTTAGGGCTC	TCTCTCCTTATAAAACTCCATCTTTGA
GELC1488	C1_10870W_A	GTATCAAATTTTGAAAATTCTTTCTGTTTGATATTGAATAATAGTATAATATAGCAAATAATCAACAAAGactggatggcggcgttagtatc	TTCTGGATTCAATAGTTCTTTAAGTCTTAGAATAGGGAAACGTATGCATTGGTGGTTTCAAACATACCATcgactatttatatttgtatg	TTTGAAGCTTTTCACCTGACTC	TCCATGTCAAAACTTCTTGGTGT
GELC1491	C1_11060C_A	AAAAAAAAAATTAAAACAAAATTTTTAGAATTACTTGCAAAAGTTACTAGTACAAACCAATCACTAAACAactggatggcggcgttagtatc	TTAACGTTTCCATGATACTCCCTGCTGTACAAGACTTATTAGACTTCATGTTGTTTCCTCACATACCCATcgactatttatatttgtatg	GTTTGTTACAATTACGCACGTG	CACCATGTGCATTAAAAGCCCT
GELC1492	C1_11360W_A	AAAGAAAAAAAAAATTTTGAAAATTCATAGACTTTCTTTCTTAAACCATCAAAAGTATAGATAATCAACAactggatggcggcgttagtatc	GTCCATGGGCTCAAACATCTTAGATATTCTAGTAAACACTTTCAATATTGTATCTTCACATACTACCCATcgactatttatatttgtatg	GCCCTAGTAGCCTTTATTTTGC	TCAACAAGTTCCAAAATAGTGCT
GELC1493	C1_12390C_A	TTTTGAAAAAAAAAAAAGAGACAACCAACCTTTTATTGTATTAACATTTTAAGATATCAAGAAACTAAAAactggatggcggcgttagtatc	TATCATTGTCTACCCATATAGGTACTCATTTTTACATACCAACTTTACCAGATTTGATGAACTTAGCCATcgactatttatatttgtatg	ATATAATGTATAGTGTGCGCGC	AACTCCAAAAGAATCTCCCAAA
GELC1494	C1_13050W_A	AAAAAATCTTAATCAATAAAACTACATTTTTCAGTTTTCAATACCCAGCAACTACATATAATAATCAAAGactggatggcggcgttagtatc	TGTTGTCAACTAAAACAACACGTCCGACTTCGACAAATCTCCAGTTGGCAGCTTTAACGGTAGAAGACATcgactatttatatttgtatg	GTGTGATGAGCTAAAACCCATT	ACCCATTTGCTAGAGTTATTTCT
GELC1496	C1_14090W_A	GAAAAATTTCACTACCATTTATATTTTTACTCTAGTATCCAATTTGAATACCGTCAACTGAATTATCAAAactggatggcggcgttagtatc	TGAGGACTACGTCAATTGTTAGTAATGAGTTCTTATATAAACTTTATTGAATTCTGAAACAACATACCATcgactatttatatttgtatg	AGGATGACGATGAAGAAGTTGA	TTATCACCGGCCTTGACAGAAA
GELC1498	C2_01610C_A	CAATGTATATCTGACTTCTTTCAAGTCTCCTAGCAACATTGAATACTAACAGCATTTACTTTAGTTAAACactggatggcggcgttagtatc	AACATCTGACTGGTTTAACGTGACCTCTACCTTTCTTGTTTCTACCGTTGGAAGCTCTCTTTTTTGGCATcgactatttatatttgtatg	CATCAAAGAAGAATGGAAACCGA	ACTCTAACAATTCTGGCGTGGA
GELC1501	C2_03960W_A	AAAAGTAAATTTTTTTCAAAAACTTTTCTATAATCAACCATCAGTTAATATTAGATCAAGTATACAAAAAactggatggcggcgttagtatc	CCATTCCAATAACACAACTGTCTATATCTATAGTGGTAAACTGTGACTACCACATACCTGACTTAGCCATcgactatttatatttgtatg	CAGTGTGCAAAATTAGGGCTAT	TCTTTCCTTCACGACTGACATCT
GELC1502	C2_05410W_A	AGTGAGAGAAAAATTTTCCAATAATATTTCCAACCCTTTAGCATCCGTATAATAAAACACAGCATCCATAactggatggcggcgttagtatc	ATAGAATAAAACATACTCTTTTGTGCAAGTTGATGGTGTATTCTCTAGTAACAACGTCTTGTAAAGCCATcgactatttatatttgtatg	TGTGATGTGTAAATAATGTCGCA	CTTTCCCATGTTATAATTCTCCAAT
GELC1503	C2_05610C_A	TTATTTGTTTTGGTTGGAAAGCGATTCCATCATGGAACAAAGTTTACTAACAACATTGTTATAGGTAAAAactggatggcggcgttagtatc	TCTTTCTGAATTGGGCTCTTTTGGCACCAGTGGCGGATCTTTTGTGACGTGAATCTCTAGAAATACCCATcgactatttatatttgtatg	TGAGAGAAGGATAGTGAATAAGAGA	TTAGATGGATGGTAAACGACAC
GELC1504	C2_05710C_A	AATTTTGTCATAAAAAATTTCAAACAACCTTGTTCTTATATAACCATTTAAGATAACTAAACTATTAACAactggatggcggcgttagtatc	CCTTCTTGTTTCTACTAGTTTGCTATAGTCTGCTTTCATTTTTGAACATACATCTGTGTGATTCAGCCATcgactatttatatttgtatg	ATTACTGCACACATTTAGTCGC	ACCGAAATAAATCAGCATATCCA
GELC1505	C2_06240W_A	AAACTGTTTCTTAACCTACTAGATAGATAACAGTACAATTGAATATAAATACATTACAATCACAGACATTactggatggcggcgttagtatc	AAAAAGCGTGTTGTTAGTATCCTGAAATGCAAAAAAAGAAAAAGCCAATATTGAATCAAACATACCTCATcgactatttatatttgtatg	GCGTTTAGAAGTCGAATGTTCA	ACAGTGCCTATCAAAAGCTCTCA
GELC1506	C2_06650C_A	TAAAAATTATTTCAATGATAAATTATATATAAATTCAAACCCTTTTTGGATCAAACATTATTTTTCTCCAactggatggcggcgttagtatc	GTTCTAACTCTTCTTGTTCATCATTAGAACTATCTAAATCATCTAATAATTCTTGTTCATAATCTGTCATcgactatttatatttgtatg	TGGTGTTGATGGATGATTGATG	CCATAGAACCATCCTCATCCCC
GELC1510	C3_05370C_A	AAATTTTTTCAAGTTTTCACGTACTTAGATTTTTGTTTAACCCAATATCAACAAGCATATAATAGAGAATactggatggcggcgttagtatc	AATGGACGTTGGCAGCTAATAACAATTTAGCGTCTTCTGGAGTTAAGTCAAATGAAGCTGGTAATGACATcgactatttatatttgtatg	TCTTGTTTCTGTTTGTTTTGCG	ACAATTGATCTGCTAGTTTCCA
GELC1513	C4_01700C_A	ATTTATTTTGTTTTTTGTTTTTTTATTATTTTAACTTACTAACTAATAATTAATTAAAAAGTTTATTACAactggatggcggcgttagtatc	ATAAGGATCTTTTTGGAGCATCTGGATCCTTCTTCTTTCTAGAGGACTTCTTTCTTTCACCTGGAGCCATcgactatttatatttgtatg	GTGAGAGAGTGAGTGAGAGAAA	ACTCTTTATTGAACTTAGGCGGA
GELC1516	C4_04480C_A	TTTTTTTAACTTCCTTTCCTTTCTTTGAAGTATCATTTTACTACACCAACACATCACAAACCAATACATAactggatggcggcgttagtatc	ATGATTTGTCAGCCAAGAATTCGTTCAATGACTTGATAGATTCGACTTTAGAGAAATCTGAGAATGACATcgactatttatatttgtatg	GAGTGAGTGAGTGGAAGAATGA	CCACCTCATAAACACGGACCAA
GELC1517	C4_04900W_A	TCAATTATACTTGGTATTTCCTTCTTTCTTTCACTACACCAAGACCGGAGTAATTAATTAATATACAGAGactggatggcggcgttagtatc	ACTTTCAATGAGACGATGTATCCATCAATCAAAGGTAATATCACGAATTTATGAAAATTATACTGACCATcgactatttatatttgtatg	TTCCAAACCTCTTTCTCACTCA	GCTAATTTTGAGTTGATGTTTTCTTGGT
GELC1519	C5_00370W_A	AACACCTCCCGTTCAGAGTTTTTTTGCTGTTTAATCAAGATATCACTTTCCACGAAATTACAATTCAATAactggatggcggcgttagtatc	ATGCTAACGTAGTTGATTGGTCTTAGCTTTTATCATTTGAAAAGTAGAACATTCTCTTGTAACATACCATcgactatttatatttgtatg	GAAACCTGTGCCTTATTTCGTT	TGCAGTTAAGGATTCGTCAGCA
GELC1523	C5_03540C_A	TTCCCCTACGGCAGTGAATGAAAAATTCTTATTCAAGTCTAAGTATACTAACTAGTACAATTTTTTTAGAactggatggcggcgttagtatc	TACCTTTTTTACCACCAGCTAAAGCGGCGGCGGCTTTAGCAGCTTTAGTTTGTTGAACCTTTGGAGCCATcgactatttatatttgtatg	TGAAAATGGGAGGAATACAGTCA	GCAACTCTGGCTAAAGAACCAC
GELC1524	C5_04080C_A	AAAAAATGTACCTACATCACAAACACTTTCCTAAATTAATCCAGCGTTAATTATCTCAATATAATCAACTactggatggcggcgttagtatc	CCCAAACTTTTTGCTGGTTCTTAACTAATGCTGGATTCCAAGACTTTTTTAGATTTAGATCACCTGCCATcgactatttatatttgtatg	TGTGGCTATAAGAACTGTAACCA	TCTCTTCCACTTTCTCATTGCCT
GELC1525	C5_04590C_A	AAAAAAAGTTCTGTTAATTTTTTACAAACTCTTTTTTGAAATACATTATTAACTACATAACTAACAGAAAactggatggcggcgttagtatc	ATATCTGATGCTTTCTATTCATCCAAACTCATTTTTCACACACTTTGACTACCGTATCTGTCACATACATcgactatttatatttgtatg	AGTTGATTTGACATTTAGGGCTG	TCTGGCCTGTTTATTGATGAACT
GELC1527	C6_00650C_A	ATTTTCATTTCCTTTCTTTCTCAATCTTCTTTTCTTACCACTAGTCAATCAATAAAATAAATCAGTCATCactggatggcggcgttagtatc	TTAATAGTATGTGATGCTGATTTTAGTGACTGATTGATTGATAACATACAGATGAATGCATACGACCCATcgactatttatatttgtatg	TGAATGAGCTTGTAACTGGTCT	CAAAGAAGAGACACCGAGACGA
GELC1530	C6_01700W_A	TGAAAAATTCTTTTGAAAAGAGAAATTCCCCTTTTTCTTACAACCTTTAATACTTGACATCATATCAAAAactggatggcggcgttagtatc	GACATTGTTTCTTCTTCCCATTTCAATATAATTCTCCCCATATCCATATATCCTCATTGTAAAACATACTcgactatttatatttgtatg	GAGAAAGCGAGAAACTGACATT	TTGTTGAGTATTTGCCGTGAGT
GELC1532	C7_00710W_A	TATTCCTCTTTTCCTCTTCCTTTTTCTTTTCCTTTCTTACTATACAAATCACATTTAATAATACATCAAAactggatggcggcgttagtatc	AAAAAAAGTGACAAATGTTAATATATGTTGTTCATCTAGGGAAGTTTCATTGCAAAAAAAAACATACCATcgactatttatatttgtatg	CGGAATTTGCTACAACACTTGA	ATCGTTTTCTCTGACTGGACCT
GELC1535	C7_00960W_A	GAAAAAAAAAATTTATTTCATTTGTTGAAAATTTTTGTATAGTTCAGTTTAACAACACCAGTAATCAAACactggatggcggcgttagtatc	AATCTTATAATACACTCACATACCGTAAAATGTGTTGGAATGAACCTTGTTCTTGGACAACTAATGGCATcgactatttatatttgtatg	ATTAGGGCTTTTAGGGCTTTCT	TCCCAAACAGTAGTAAATCATTGC
GELC1540	CR_03770C_A	CAAAAAAAAATTCTTGAACCAATTGAGTTTTATATTATAGTAAACATACACCACATTAAATCACGTCAAAactggatggcggcgttagtatc	ACTTCGATGTATGCCCCTGCTCTCTCATTATTTGATAATTCCAATTCAAACGTTATCGTCGACATACCATcgactatttatatttgtatg	GTACAAGCCAAACTAGCCAAAA	AGCTTTGTTTAAAAGTGTGAGCAGA
GELC1542	CR_07630C_A	AAAAAAAAAATTTTCAGTTTTCAATAGATTTCAGTTTTTGAATTATACATATTAGAGAAACAAGTTAGCAactggatggcggcgttagtatc	TATATTATGATATTCTGATCATCCAAGAATATCCCTCCATAACTCATGGTAAATCTAATGAACATACCATcgactatttatatttgtatg	TGAGCCCTAATAGCCCTAATTG	CTTTGACGTTTTCTGAGGTGGT
GELC1543	CR_08010W_A	ATAAAATGGAGAGCTTTAAAACCACAACAACCACAACCTTATCCTTTTACATTGAAATAGTGCTGATACAactggatggcggcgttagtatc	TACAACGTACCATATTATTAATTATTCTTGACAATAACGCGTTATGCGTCTGTTCGTGAGGATTTTCCATcgactatttatatttgtatg	TGCAATCAGAAACTTTCAGACG	GGCTCCTTCTTCAAACCAGTCA
GELC1574	C2_06810C_A	AAATCTTTCGTTTGAAAAGTTTTGAAAGGTTCGTTTTCTCAATAGTATATCCATACAATAACTGCCAAAGactggatggcggcgttagtatc	TTTCTCATTATGATATCACTTCCAATTAAAACAAAACATTTCGATCTCTTTAAACACTTGAACATACCATcgactatttatatttgtatg	AAGTATCCTGTGTCACGTGATT	ACTGGTATCTGTTATATGCTGGCT
GELC1650	C3_07420W_A	GGAAAAAAAAGCACACTGAAGAAAAATTTTCACCTCAAGTCAAAGAACCTGGTAAACACGTATAAAAACCactggatggcggcgttagtatc	ATAATGACAACAAAACGGATGATGAGATATGAACTGTGTTCAATGTAGCTGGGGTGTATTTTGATGCCATcgactatttatatttgtatg	ACATAATGATTGTGGGTGTTGG	ACTGTAGATTGAAACCATCCCA
GELC1652	C4_06720W_A	TTTTATCAATTTGTTCTTGTTCAACAAATATTTCCAATTCAATCTAGTTTAATAATCATACATATACATAactggatggcggcgttagtatc	TTCCGCCACCGAAACCACCACGGCCACCTCTTGCTGGACCGCCTCTACCTCTTGGAGCTCCGAATGCCATcgactatttatatttgtatg	TTGCTTTGTTATGGCTCTGAAG	TGGCAATGAAAACACCAGCATG
GELC1653	CR_05050W_A	CTTTTATACAATTAGACGTTAGTCTTGACTATTTACTTAACAACTACAACAACACATATATATAACAAAAactggatggcggcgttagtatc	TTTTACCATTTTGAGACAATTCCAAATATTTAGCCAAAATAGCAGTTTGTTCTGTAAGGGAAGTAGTCATcgactatttatatttgtatg	GTTTGATTTCACTTGCAATGAGT	AGCTTGACCAGTAGATGAACCA
GELC1655	C3_07750W_A	TAAAAAAATGTGGAAAATTTTTTGGATTTAGCACCTTCAATCTTTTCTTAGCATTGTTCTCTCTTCCCACactggatggcggcgttagtatc	CTCTTATTTCATCCTTGCCATTCCTATCTATTAGAGTGGCGACCTTATTTCCATTCAAAGCGTACTTCATcgactatttatatttgtatg	GATTCGTTGAAATCGGTCATCA	TCTGACCCCTCTGATAAAACAACA
GELC1657	C3_06870W_A	TTCTTTTATTCATCACAATTGAATTCAAATCAATTAACATCAACAAACTTTACAATCAAATTAATTAACAactggatggcggcgttagtatc	TGCCCAAAGCAACTCTTAAGACTAATCTACCGATTCTACCGAAACCGTTAATACCAATTTTAATAGCCATcgactatttatatttgtatg	AAATTGTTTCAACCAACCCACT	AGCTGGGTCTCTTTCTTGGAAA
GELC1658	CR_03830C_A	TAATTCTTTCTTCCCTTCTTTTACCACTTTAGTTATTGACTTTATTAATTACATTACTATTTAATCAACCactggatggcggcgttagtatc	CATCGTAAGGTGATCTTTTCCTTCTTCGATTATTGTCACGAGATGAGGAAGCAGCTGGTGGACTTGACATcgactatttatatttgtatg	CAACATTCAATCACGTCCAGAA	TCGTCCCCTTCTTCTTCTGAAT
GELC1660	C1_05780W_A	ACTGGTTATCTACTACTACTCTTACGCTTGATTCACTAATAAAGAAACCTACAACACAAAATACCTTACCactggatggcggcgttagtatc	TATTTCCGGTGGCCCCACTCAATGAGAGAGTCGTTCTGGAGCTGGAGCTAACTGGTACTAATGAAGGCATcgactatttatatttgtatg	AGATGCATAGCTCTTGATGGTT	ATAGACATATGGGTTAACAGACTC
GELC1661	C2_04020C_A	ATAGTAGACTAAACTCTCCTGATACTTGCTAATTATTTGACAACAAAAGTACCATAACACACAACCTAGAactggatggcggcgttagtatc	CCTTCTCCTCTTCTTGTAGAATCCCGACCGGTTTCTCAACTAATTCTTTATTGGTTTCTTGTATTGGCATcgactatttatatttgtatg	TTAGAATGGGTATCGCTAGTGG	CCCAGTGGTTAAGTCCTGATCA
GELC1663	C2_05530C_A	TAGTTTAGTTCAACTTATACATTTAGAAACGGAATTAAAGAGCTCTATTATAAAGAAATACTCAATCCAAactggatggcggcgttagtatc	TTCTTTTCAATTGAACTGATGTCAGTTCGTCTGAATCAATTTTTCTTTTACTTGGACTCTCGTCAGGCATcgactatttatatttgtatg	AAGTTAGTGTCTCAACCGTTCT	CCTGTCTGGTTGTTGATTGTCT
GELC1664	C2_09740W_A	TTCACTTTTCATTTTTTTGGTTTTTACATTCATATCATTCAACTTGACGTTTATTTAACTAGAAACAACCactggatggcggcgttagtatc	GATAATTGTTCAACTCATATGAGTTGTTTTGTTGATAACCATTCTGGGAATTCTGATACGGGTTGCTCATcgactatttatatttgtatg	ACCCTACACACAAACGTACATA	AACGGCTTGAGTTTGCACATTT
GELC1666	C4_01050C_A	AAAAAAAAAATAAACTTGAATATTTTGGAATCCCCTTTTTGATTACTACAATAGATTAAAGTAACTAAAGactggatggcggcgttagtatc	AACATTTACGACAAATGGATTTTTCACAGTTGTATTTTGAAGCTAAAGCTTTCAAGGATGGTTCAATCATcgactatttatatttgtatg	TTGTCGATTCTCAAACCTCTCT	TCATCCTCCTCTAAACCTTCAATGA
GELC1667	C1_04180W_A	TTTATTCTTCTTTTTCTTTTTCATTACTTTATTTTATTAATCGAACACATATATATTTATATAATTAAAAactggatggcggcgttagtatc	TTTTTTTAGCGGCTGGTTTTTTTTCAGCTGGAGCTTTAGAAGCTGGTTTCTTTTCTGCTTTTGGGGCCATcgactatttatatttgtatg	ATTTAGTGCCACCAAGAAGAGA	TGTAAGCAGCCAATTTAGAAGC
GELC1668	C4_01710C_A	CAAGTTGTGTTGCCAACTACTCAACAACAAGTTGATTCTGTGGGTATTTCATTCGGATCATTGTCAGTTGactggatggcggcgttagtatc	TCTGGTTGAACTTGTTCAGAAATAGTCTCATCTTGTATGACTTCTGCTGCTTCCTTTGGTTCACCTGCATcgactatttatatttgtatg	AACCAGAAGAGCATATTCCAGT	TGTTGTTGTGTTGGTTGACTTGT
GELC1669	CR_04100C_A	ATTTTTTTTTCACTTGACTTTTTTGTTTTTGTTTTTTGTTCATTAGCTACCACCAAATCAACTATCAACAactggatggcggcgttagtatc	GATACAAGAATCTCATAACATCAGATTGCTTCTTTCTTTGCAATTCTTCTAAATATTTGTAGGCACCCATcgactatttatatttgtatg	GTATATCCTACAGTCACGTGCA	GTCTGGAAGCTCTGTGGATGAC
GELC1670	C1_03020C_A	TTCTAATTAAAACTACTTTTCATTGGAAAACAGTTCTACTTCCTACAAGTCTAACCACCAGAAAGCAACAactggatggcggcgttagtatc	CTCTGACTCTTTCTTGCCAGTGCTTTCTGAAGTGGTTGTTCAATAATGGTAAGTTCTTGGAAATAGCCATcgactatttatatttgtatg	AGCCCTAGATTGTGTACAGTAC	GTTCTGGCGTATTTTGGAGCAA
GELC1683	C2_01710W_A	AACAACAACGAACATCACATATATCATTTTCTACAAAGTCACTTCCAAAAACCACAGTTATATACCAGCAactggatggcggcgttagtatc	TTGTGCGTATTATTGATTGTCTTTCATTTGAAGATATTGCTTGTTTGTTTGGTGTATTACTGCTACTCATcgactatttatatttgtatg	GATGATTTGCGTGACTGATTCA	TGACCAGCCATAAATATACTTGCA
GELC1742	C2_05190W_A	AAAAATATGAATGAAAATACATAACACTTAGTTTTCTTTCATAATTGAAAACAAATTCAAATCACTACAAactggatggcggcgttagtatc	CACCTTCATCTATAATCCTTTTACATAAATCAAGATATGCTTGCTCTGCAGTGTTAGGTGATACAGTCATcgactatttatatttgtatg	AATTTGTAGATTTGTGTGGGGC	TAGCATCAGTAGAGCCAGCAAC
GELC1743	C2_00220C_A	ATATACCAGGGGCGACAAAAAAAAAAATAGCCAAAATCAATCATCGTTTTCTCTTTGTACAGCACCCATCactggatggcggcgttagtatc	CATTGGGGGTATCTTGTTTGGTAGTGGATTCAGATGTCTTTTTGGTTGGACTTGTTTTAATCGAACTCATcgactatttatatttgtatg	AAAATGTTCCTGACCTCCTGAA	TAATTTACCCCGTGCGTCCTTT
GELC1745	C3_02470C_A	TCCCTTTCCCTTTCTTCTCTTCTTTTTTTTTGAAAAAGTATTCAAGTATAGTAATCCAAAAGATAGAACAactggatggcggcgttagtatc	CTCTGGCTTTAATATCAACAGTGACACCTTCTGGGATATCTAAGATTTGATCAGTTTGGATGTACTTCATcgactatttatatttgtatg	TAACCCTAGCGCACATGAATAT	TGACACCAGTGATCAAGTTAGCA
GELC1747	C2_04600C_A	TCAAAGGAAAAAAAAATTTTTTACAGTTAACTTTTTCTCCATTGAAATCCACATTAAATACAATTCAACAactggatggcggcgttagtatc	CTCTCAAGTAAGAACCACGGGCAGAAGCTGATTTGGCTGGGTTAGCAGGAGTGGCAGCGTAACGAACCATcgactatttatatttgtatg	TGGAAATATGGTCGCACTCATA	TGACAGATTTAGCAGGCCATCT
GELC1749	CR_07420W_A	GTTGTTGAACAAGTGAATTTTCCCAATTAAAACTAGACTTTTTTTTATACCACTCTGGTAATTCATCACCactggatggcggcgttagtatc	ACTTGGCAGCGGTTGGTCTGGCTAAAGCTGTAGTACGCTTCAATGATGATTTAATAGATCTTGATAACATcgactatttatatttgtatg	TCAAATACCCACACCGTTAAAC	ATCGGTTTCAATGGTGGCAATC

## Sheet: Other Primer
Supplementary Dataset 7: Primers used in this study.
Oligo ID	Description	Sequence (5' to 3')
	HIP UP-TAG universal amplification primer	AATGATACGGCGACCACCGAGATCTACACCGAGGTCGAGAATGATGTCCACGAGGTCTCT
	HIP UP-TAG index amplification primer (1)	CAAGCAGAAGACGGCATACGAGATNNNNNNGCCATTTGTCTGTCGACCTGCAGCGTACG		1 , For solvent triplicates NNNNNN= CGTGAT, ACATCG, and GCCTAA and for drug treatment triplicates NNNNNN= TTGACT, GGAACT, and TGACAT.
	HIP DOWN-TAG universal amplification primer	AATGATACGGCGACCACCGAGATCTACACCACATGATATGTTGAGCGGTGTCGGTCTCGTAG
	HIP DOWN-TAG index amplification primer (1)	CAAGCAGAAGACGGCATACGAGATNNNNNNGAGTATCTGTATCTGGCC GAGCTCGAATTCATCGAT
	HIP UP-TAG sequencing primer	CGAGGTCGAGAATGATGTCCACGAGGTCTCT
	HIP DOWN-TAG sequencing primer	CACATGATATGTTGAGCGGTGTCGGTCTCGTAG
	HIP UP-TAG index sequencing primer	CGTACGCTGCAGGTCGACAGACAAATGGC
	HIP DOWN-TAG index sequencing primer	ATCGATGAATTCGAGCTCGGCCAGATACAGATACTC
oLC9302	CaGLN4_amp_F1	CCAGACGCGGTAGTCTTCTTGC
oLC9303	CaGLN4_amp_R1	TTCTCCTTGGAGCGCGTTCG
oLC9304	CaGLN4_seq_F1	TTGAATTGGCAGCGCAGAGC
oLC9305	CaGLN4_seq_F2	TGAGATTACTCCTGAAGAAGC
oLC9306	CaGLN4_seq_R1	TGGCCTTAGAGTGACCAATGTGC
oLC9307	CaGLN4_seq_F3	TCGATGAATTGTACGAGTTGGC
oLC9308	CaGLN4_seq_R2	TGCATCACACAACCACTCATACG
oLC9309	CaGLN4_seq_F4	AACGGTGAGATTTGAAAGTGC
oLC9310	CaGLN4_seq_R3	ACCTTCGTCATAGTTAACATGGACG
oLC9311	CaGLN4_seq_R4	TCCGAGAGTTTGGATGCGCAC
oLC9374	CaMtw1-pLC1208-F	ACAAAATCAAGACGACATTGATATGATAATACCAGAACAAGACGATATAGATGTGGATGCAATAAAGAATATAAATGCTCAAATTggtcgacggatcccc
oLC9375	CaMtw1-pLC1208-R	TCAAGTCATTAAATTAACCTAAATGTGTATATGTATACGTTTGTTTGTTTGTTTGTTTGTTTGTTTGTTTGTTTGTTTAGTCtcgatgaattcgagctcg
oLC9376	CaMtw1+803-F	ATCAAGATTCTGGTGCAGGG
oLC9377	CaMtw1+1230-R	TGGAATAATGAAAAATCACG
oLC9378	CaMtw1-sgRNA-R	CACGACAGCAATGAAGTTGGcaaattaaaaatagtttacgcaagtc
oLC9379	CaMtw1-sgRNA-F	CCAACTTCATTGCTGTCGTGGTTTTAGAGCTAGAAATAGCAAGTTAAAA
oLC9380	CaMtw1+990-F	TGGAAAACTATCTTATGTTG
oLC9381	CaGcf1-pLC1208-F	TCTTGAAAAATGGAAAGAACTTAGATTGAAGGAATACAGTGATTATTTGAAATTTAAGGAAAACTACAAAGTGGAGGATGACTTTggtcgacggatcccc
oLC9382	CaGcf1-pLC1208-R	ATGACAGTTGTTAAACAAATTGTATATTTTTACATATATTTTATAGTTCAAACAAATTGTAAGTTGATGTATCTTTTATTTAtcgatgaattcgagctcg
oLC9383	CaGcf1+607-F	ATCTGAAACTGAAAAGCAGC
oLC9384	CaGcf1+981-R	TGTATTTTACCCCCTTGTGC
oLC9385	CaGcf1-sgRNA-R	CTTTTAGTTGATTGAGTTCTcaaattaaaaatagtttacgcaagtc
oLC9386	CaGcf1-sgRNA-F	AGAACTCAATCAACTAAAAGGTTTTAGAGCTAGAAATAGCAAGTTAAAA
oLC9387	CaGcf1+780-F	GTCGGTTATGATAAACCCAC
oLC9388	CaDad1+pLC1208-F	TCATCAAACAAGAGAAAATACCCGTGACGAAAATAATAAAATAAGTTCCTCTGATACAGAAGATGAAAACAACAACAACAAGATAggtcgacggatcccc
oLC9389	CaDad1-pLC1208-R	CTGGAAATCTGGAAATCTGGTTTTGTATTCTTGTTATTCTTCTTTTTGTTATTACATATATAACTTGTTACTTTTTTAAAAAtcgatgaattcgagctcg
oLC9390	CaDad1+197-F	TGGTCGACATTTTATGATGG
oLC9391	CaDad1+596-R	TTGTTCACCACAAATGTTTC
oLC9392	CaDad1-sgRNA-R	TGGGTGGCTATTTTATAGTCcaaattaaaaatagtttacgcaagtc
oLC9393	CaDad1-sgRNA-F	GACTATAAAATAGCCACCCAGTTTTAGAGCTAGAAATAGCAAGTTAAAA
oLC9394	CaDad1+400-F	AAAGCTAAGCTAAATTCAAG
oLC9284	CaC6_03200W-pLC389-F	TCGAGTTCGTTCTGATCATACTAAGAATCTTATGAAAATCAAACAGAGTTCCAATGAGTACTTAAAAAACGGTGGTGGTTCTAAAGGTGAAGAATTAT
oLC9285	CaC6_03200W-pLC389-R	GTTTTATTATACACGAGTATGATCTACCATATATATATATCTTTATATTTACAGGAATGTATAACAAAGTGTAAAACGACGGCCAGTGAATTC
oLC9286	CaC6_03200W+1115-R	AGATCTTCAAGATGAATCGG
oLC9287	CaC6_03200W+861-F	CAGCAGTTTTCAATGATGGA
oLC9288	CaC6_03200W-sgRNA-R	ATGTTTTCTACAAAACAAAAcaaattaaaaatagtttacgcaagtc
oLC9289	CaC6_03200W-sgRNA-F	TTTTGTTTTGTAGAAAACATGTTTTAGAGCTAGAAATAGCAAGTTAAAA
oLC9290	CaC6_03200W+993-F	CGGTTTTTCGATTTTGTTTTG
oLC9334	CaC1_01070C-pLC389-F	TCTGAAAAATGTTGACACAAAAGATCTTTTAAGAGCTATATGTCGGTTGGAAACCCAAAACAAATCTTCAGGTGGTGGTTCTAAAGGTGAAGAATTAT
oLC9335	CaC1_01070C-pLC389-R	TAATACATGACAAGAAATAAATAATGATGAAAAAATTAAAAGTAAATCAATGATAAATGTTTTGCAATCGGTAAAACGACGGCCAGTGAATTC
oLC9336	CaC1_01070C+1326F	GGTAGCAATAACAGATGGTC
oLC9337	CaC1_01070C+1639R	ATAGAATACCGAGGTTGTGC
oLC9338	CaC1_01070C-sgRNA-R	CAGTTTTTCCTTATACTGATcaaattaaaaatagtttacgcaagtc
oLC9339	CaC1_01070C-sgRNA-F	ATCAGTATAAGGAAAAACTGGTTTTAGAGCTAGAAATAGCAAGTTAAAA
oLC9340	CaC1_01070C+1430F	GTCCGATTAATAAACCCCAG
oLC9514	CaNAD2+498-F	TTCGTTACAGGTGGTATAGC
oLC9515	CaNAD2+665-R	CATGTAAAGGTGCTAATCCC
oLC2535	TetOp-F	GTTTGGTTCAGCACCTTGTCG
oLC6701	CaHIS3prom_UPtag_R10	CCACCATCTAAATTAAGGGC
oLC6853	SAT1_R	CGCAGAAAGTAATATCATGC
oLC8017	CaHIS3+468-F	TTGTCAACGGAAATGATCCC
oLC6924	pLC963-CaCas9-F	ATCTCATTAGATTTGGAACTTGTGGGTT
oLC6925	pLC963-CaCas9-R	TTCGAGCGTCCCAAAACCTTCT
oLC5978	pLC963-SNR52-F	gactgtcaaggagggtattc
oLC5979	pLC963-SNR52-Nested-F	CCGCaagtgattagacttag
oLC5980	pLC963-sgRNA-R	gaataccacttgtttaccgg
oLC5981	pLC963-sgRNA-Nested-R	GGTGGCGGCAAAACTAATTC
oLC600	GFP+344-R	CCTTCAAACTTGACTTCAGC
oLC274	pJK863down-F	CTGTCAAGGAGGGTATTCTGG
oLC6970	pLC1208down-F	TGCTCTTGGTGGTACTGC
oLC6971	pLC1208up-R	CATTCTGTTTATTTGAGACTACTCTTG

## Sheet: qRT-PCR Primers
Supplementary Table 4: Primers used in this study.
Oligo ID	Description	Sequence (5' to 3')
oLC2285	CaACT1AB+855-F	GACCTTGAGATACCCAATTG
oLC2286	CaACT1AB+1076-R	CAGCTTGAATGGAAACGTAG
oLC752	GPD1A+570-F	AGTATGTGGAGCTTTACTGGGA
oLC753	GPD1AB+766-R	CAGAAACACCAGCAACATCTTC
oLC9312	CaRPG1_AB_758F	CTAGTGGTCATAATGCCATTG
oLC9313	CaRPG1_AB_1040R	CTTCATCAGTAGCTAAAGGTG
oLC9314	CaPRT1_AB_857F	GTGAACCAGTCAGAACATTTG
oLC9315	CaPRT1_AB_1026R	CTTGAATACCATCAACTTTAACC
oLC9316	CaNIP1_AB_251F	CTGACAGTGATAGTGATGATG
oLC9317	CaNIP1_AB_462R	GGAGTTATCTAAACTAGTCAAC
oLC9320	CaTIF35_AB_238F	CCAGGACCAGATACCAGTAC
oLC9321	CaTIF35_AB_445R	GCCACTTGGAGTAACACCAGC
oLC9322	CaTIF34_AB_618F	CCAATTCGCCCCAGAAGACAG
oLC9323	CaTIF34_AB_746R	GTCTTTGACCGGGGTAATGG
oLC9324	CaC5_02660C_AB_602F	CCATTACTGAAAAGATTGCC
oLC9325	CaC5_02660C_AB_733R	CGGTGGCTTTATTCAATTGTTG
oLC9326	CaC3_07420W_AB_206F	CAAGAAGTGGGGGTCAATAC
oLC9327	CaC3_07420W_AB_395R	GGATACTTCTTGTCCAACAC
oLC9330	C2_04370W_AB_726F	GGTCAATACTAATGTTGCTC
oLC9331	C2_04370W_AB_907R	GATGAGGAGGTAGAAGCATC
oLC9332	CaHCR1_AB_260F	GAACTCGTAAGGAATTGTTG
oLC9333	CaHCR1_AB_435R	CCTTAGTTAATGCTGGTCTC
oLC9341	CaC6_03200W_AB_616F	CATGTATCTCAAAATGCTGC
oLC9342	CaC6_03200W_AB_774R	GTCCATTCTGCAACATCTCC
oLC9343	CaC1_01070C_AB_456F	GGACGATTACATAGAGCAAG
oLC9344	CaC1_01070C_AB_656R	CAATTGTCTCAACCTATCTG
oLC9345	CaMTW1_AB_423F	CATGCAAGAATTACAACTTCG
oLC9346	CaMTW1_AB_705R	CATCAATGAATTTATCACGC
oLC9347	CaNSL1_AB_69F	CATACTACAGGCGATCATGG
oLC9348	CaNSL1_AB_204R	GTAAATCTAGTCCATCGGCC
oLC9349	CaNNF1_AB_591F	GTGTCTCGATAATGCTGAGC
oLC9350	CaNNF1_AB_529R	CCCGCTTTTTCTAGCTCAAC
oLC9351	CaGLN4_AB_830F	GGTACGCTCAATTCAACAAG
oLC9352	CaGLN4_AB_982R	GCCAACTCGTACAATTCATC
oLC9415	CaASK1_AB+371F	GGTATGAGGATAGTCGTGGG
oLC9416	CaASK1_AB+512R	CTCTGTTGACCATGTAGGGG
oLC9417	CaSPC19_AB+16F	CTACCACAGAACCAACGATTC
oLC9418	CaSPC19_AB+213R	GTGGGGTAATATTCTTGGTG
oLC9419	CaDAD1_AB+163F	GATGTTGCTAGATTATGGTC
oLC9420	CaDAD1_AB+269R	GTTGTTGTTTTCATCTTCTG
oLC9421	CaDAD2_AB+130F	GAGACGATGAATGGAGGAAC
oLC9422	CaDAD2_AB+252R	CTAATGGTTCAGGGAAAGCC
oLC9423	CaDAM1_AB+323F	GATGTCCAAGTAGAGAGCAATG
oLC9424	CaDAM1_AB+482R	GTGTTGGTCTTTGCTGTGATG
oLC9425	CaHSK3_AB+64F	CGCACAACATTAACTCCACC
oLC9426	CaHSK3_AB+125R	CGTTGTGTAGCAGATGATGAAG
oLC9427	CaDUO1_AB+297F	GTTTGGAGAAGGACAACAAC
oLC9428	CaDUO1_AB+412R	GCATTCTTTTCCTTGGCTTG
oLC9429	CaSPC34_AB+231F	GGATAGTAAACCCGAAAGAG
oLC9430	CaSPC34_AB+366R	GGTCTCGAATAAGCATTTCTG
oLC9431	CaDAD3_AB+224F	GACAACTAGAGACAAAATTGG
oLC9432	CaDAD3_AB+348R	CCTCTTCATTACCATCTTCC
oLC9433	CaDAD4_AB+11F	CTCACGAACAGACGCATAAC
oLC9434	CaDAD4_AB+187R	CTTCTTCAAACCAGTCACCTC
oLC9441	CaTIM12_AB+26F	CCCAATTTTCTCAAGCTACC
oLC9442	CaTIM12_AB+144R	CACCTTCACCATATTCACGT
oLC9651	oLC9651-Ca_GCF1+155-F	TACCAAACCTCCTAAAGTCG
oLC9652	oLC9652-Ca_GCF1+369-R	ACGCTTCTTTTGGAACATGG
oLC7860	BamHI_HIS3_F	CGCGGATCCCGTACGCTGCAGGTCGAC
oLC7861	HIS3_BamHI_R	CGCggatccATCGATGAATTCGAGCTCG
oLC6701	CaHIS3prom_UPtag_R10	CCACCATCTAAATTAAGGGC
oLC244	M13-Forward	GTAAAACGACGGCCAG
oLC243	M13-Reverse	CAGGAAACAGCTATGAC
oLC7964	oLC7964_BamHI RFP sense	TCGACGGATCCCCGGTGGTGGTGGTgtttcaaaaggtgaagaaga
oLC7965	oLC7965_Asc1 RFP anti	GATGCGGCGCGCCttatttatataattcatccataccacc
